# Supplementary material for: Water-Soluble Polyoxometal Clusters of Molybdenum (V) with Pyrazole and Triazole: Synthesis and Study of Cytotoxicity and Antiviral Activity
Source: MDPI journal article supplement (doi:10.3390/molecules28248079), 2023-12-14

## checkCIF/PLATON report

Structure factors have been supplied for datablock(s) jul167-4

THIS REPORT IS FOR GUIDANCE ONLY. IF USED AS PART OF A REVIEW PROCEDURE FOR PUBLICATION, IT SHOULD NOT REPLACE THE EXPERTISE OF AN EXPERIENCED CRYSTALLOGRAPHIC REFEREE.

No syntax errors found.      CIF dictionary      Interpreting this report

### Datablock: jul167-4

---

|                 |                                                                   |                                            |
|-----------------|-------------------------------------------------------------------|--------------------------------------------|
| Bond precision: | N- C = 0.0081 A                                                   | Wavelength=0.71073                         |
| Cell:           | a=26.6106(4)                                                      | b=26.6106(4)      c=26.6106(4)             |
|                 | alpha=90                                                          | beta=90      gamma=90                      |
| Temperature:    | 150 K                                                             |                                            |
|                 | Calculated                                                        | Reported                                   |
| Volume          | 18843.6(8)                                                        | 18843.6(8)                                 |
| Space group     | I -4 3 d                                                          | I -4 3 d                                   |
| Hall group      | I -4bd 2c 3                                                       | I -4bd 2c 3                                |
| Moiety formula  | 12(C16 H16 Mo12 N24 O28),<br>3(O4), 4(O3), 6(O2), 84(O),<br>48(N) | 4(N H4), C16 H16 Mo12 N24<br>O28, 10(H2 O) |
| Sum formula     | C192 H192 Mo144 N336 O456                                         | C16 H52 Mo12 N28 O38                       |
| Mr              | 28318.21                                                          | 2396.13                                    |
| Dx, g cm-3      | 2.496                                                             | 2.534                                      |
| Z               | 1                                                                 | 12                                         |
| Mu (mm-1)       | 2.419                                                             | 2.420                                      |
| F000            | 13392.0                                                           | 13824.0                                    |
| F000'           | 13148.99                                                          |                                            |
| h, k, lmax      | 38, 38, 38                                                        | 37, 38, 38                                 |
| Nref            | 4795[ 2538]                                                       | 4789                                       |
| Tmin, Tmax      | 0.865, 0.865                                                      | 0.684, 0.746                               |
| Tmin'           | 0.865                                                             |                                            |

Correction method= # Reported T Limits: Tmin=0.684 Tmax=0.746

AbsCorr = MULTII-SCAN

Data completeness= 1.89/1.00

Theta(max)= 30.495

R(reflections)= 0.0243( 4537)

wR2(reflections)=  
0.0565( 4789)

S = 1.131

Npar= 254

---

The following ALERTS were generated. Each ALERT has the format

**test-name\_ALERT\_alert-type\_alert-level.**

Click on the hyperlinks for more details of the test.

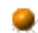

### Alert level B

PLAT043\_ALERT\_1\_B Calculated and Reported Mol. Weight Differ by .. 435.35 Check

**Author Response: Reported formula contain 36 unlocalized H atoms of 10 disordered solvate water molecules and 4 ammonia cations. Also the checking algorithm calculate the number of the formula units as 1 instead the real 12.**

PLAT430\_ALERT\_2\_B Short Inter D...A Contact O5W ..N1N . 2.85 Ang.  
z,x,y = 11\_555 Check

**Author Response: The H atoms of the disordered solvate water molecules are not localized. This contact corresponds to the H bond.**

PLAT430\_ALERT\_2\_B Short Inter D...A Contact N1N ..N14 . 2.87 Ang.  
-1/4+y,-1/4+x,-1/4+z = 44\_444 Check

**Author Response: The H atoms of the disordered solvate water molecules are not localized. This contact corresponds to the H bond.**

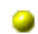

### Alert level C

PLAT041\_ALERT\_1\_C Calc. and Reported SumFormula Strings Differ Please Check  
PLAT042\_ALERT\_1\_C Calc. and Reported MoietyFormula Strings Differ Please Check  
PLAT068\_ALERT\_1\_C Reported F000 Differs from Calcd (or Missing)... Please Check  
PLAT241\_ALERT\_2\_C High 'MainMol' Ueq as Compared to Neighbors of N14 Check  
PLAT250\_ALERT\_2\_C Large U3/U1 Ratio for Average U(i,j) Tensor .... 2.1 Note  
PLAT430\_ALERT\_2\_C Short Inter D...A Contact O3 ..N1N . 2.88 Ang.  
x,y,z = 1\_555 Check

**Author Response: The H atoms of the disordered solvate water molecules are not localized. This contact corresponds to the H bond.**

PLAT911\_ALERT\_3\_C Missing FCF Refl Between Thmin & STh/L= 0.600 3 Report  
PLAT975\_ALERT\_2\_C Check Calcd Resid. Dens. 0.72Ang From N1N . 0.70 eA-3  
PLAT975\_ALERT\_2\_C Check Calcd Resid. Dens. 0.91Ang From N1N . 0.47 eA-3  
PLAT975\_ALERT\_2\_C Check Calcd Resid. Dens. 1.00Ang From N1N . 0.46 eA-3  
PLAT975\_ALERT\_2\_C Check Calcd Resid. Dens. 1.07Ang From O2 . 0.45 eA-3  
PLAT975\_ALERT\_2\_C Check Calcd Resid. Dens. 1.07Ang From N1N . 0.42 eA-3

## ● Alert level G

FORMU01\_ALERT\_2\_G There is a discrepancy between the atom counts in the  
\_chemical\_formula\_sum and the formula from the \_atom\_site\* data.  
Atom count from \_chemical\_formula\_sum: C16 H52 Mo12 N28 O38  
Atom count from the \_atom\_site data: C16 H16 Mo12 N28 O38.  
CELLZ01\_ALERT\_1\_G Difference between formula and atom\_site contents detected.  
CELLZ01\_ALERT\_1\_G WARNING: H atoms missing from atom site list. Is this intentional?  
From the CIF: \_cell\_formula\_units\_Z 12  
From the CIF: \_chemical\_formula\_sum C16 H52 Mo12 N28 O38  
TEST: Compare cell contents of formula and atom\_site data

| atom | Z*formula | cif sites | diff   |
|------|-----------|-----------|--------|
| C    | 192.00    | 192.00    | 0.00   |
| H    | 624.00    | 192.00    | 432.00 |
| Mo   | 144.00    | 144.00    | 0.00   |
| N    | 336.00    | 336.00    | 0.00   |
| O    | 456.00    | 456.00    | -0.00  |

|                   |                                                  |                |              |
|-------------------|--------------------------------------------------|----------------|--------------|
| PLAT003_ALERT_2_G | Number of Uiso or Uij Restrained non-H Atoms ... | 4              | Report       |
| PLAT045_ALERT_1_G | Calculated and Reported Z Differ by a Factor ... | 0.083          | Check        |
| PLAT083_ALERT_2_G | SHELXL Second Parameter in WGHT Unusually Large  | 64.25          | Why ?        |
| PLAT171_ALERT_4_G | The CIF-Embedded .res File Contains EADP Records | 1              | Report       |
| PLAT186_ALERT_4_G | The CIF-Embedded .res File Contains ISOR Records | 1              | Report       |
| PLAT300_ALERT_4_G | Atom Site Occupancy of O3W                       | Constrained at | 0.25 Check   |
| PLAT300_ALERT_4_G | Atom Site Occupancy of O1W                       | Constrained at | 0.25 Check   |
| PLAT300_ALERT_4_G | Atom Site Occupancy of O7W                       | Constrained at | 0.25 Check   |
| PLAT300_ALERT_4_G | Atom Site Occupancy of O2W                       | Constrained at | 0.75 Check   |
| PLAT300_ALERT_4_G | Atom Site Occupancy of O5W                       | Constrained at | 0.5 Check    |
| PLAT300_ALERT_4_G | Atom Site Occupancy of O6W                       | Constrained at | 0.75 Check   |
| PLAT300_ALERT_4_G | Atom Site Occupancy of O4W                       | Constrained at | 0.375 Check  |
| PLAT300_ALERT_4_G | Atom Site Occupancy of O8W                       | Constrained at | 0.1667 Check |
| PLAT300_ALERT_4_G | Atom Site Occupancy of O9W                       | Constrained at | 0.25 Check   |
| PLAT300_ALERT_4_G | Atom Site Occupancy of O11W                      | Constrained at | 0.375 Check  |
| PLAT300_ALERT_4_G | Atom Site Occupancy of O12W                      | Constrained at | 0.25 Check   |
| PLAT302_ALERT_4_G | Anion/Solvent/Minor-Residue Disorder (Resd 2 )   | 100%           | Note         |
| PLAT302_ALERT_4_G | Anion/Solvent/Minor-Residue Disorder (Resd 3 )   | 100%           | Note         |
| PLAT302_ALERT_4_G | Anion/Solvent/Minor-Residue Disorder (Resd 4 )   | 100%           | Note         |
| PLAT302_ALERT_4_G | Anion/Solvent/Minor-Residue Disorder (Resd 5 )   | 100%           | Note         |
| PLAT302_ALERT_4_G | Anion/Solvent/Minor-Residue Disorder (Resd 6 )   | 100%           | Note         |
| PLAT302_ALERT_4_G | Anion/Solvent/Minor-Residue Disorder (Resd 7 )   | 100%           | Note         |
| PLAT302_ALERT_4_G | Anion/Solvent/Minor-Residue Disorder (Resd 9 )   | 100%           | Note         |
| PLAT302_ALERT_4_G | Anion/Solvent/Minor-Residue Disorder (Resd 10 )  | 100%           | Note         |
| PLAT302_ALERT_4_G | Anion/Solvent/Minor-Residue Disorder (Resd 11 )  | 100%           | Note         |
| PLAT302_ALERT_4_G | Anion/Solvent/Minor-Residue Disorder (Resd 12 )  | 100%           | Note         |
| PLAT302_ALERT_4_G | Anion/Solvent/Minor-Residue Disorder (Resd 13 )  | 100%           | Note         |
| PLAT304_ALERT_4_G | Non-Integer Number of Atoms in ..... (Resd 3 )   | 0.75           | Check        |
| PLAT304_ALERT_4_G | Non-Integer Number of Atoms in ..... (Resd 4 )   | 0.50           | Check        |
| PLAT304_ALERT_4_G | Non-Integer Number of Atoms in ..... (Resd 5 )   | 0.25           | Check        |
| PLAT304_ALERT_4_G | Non-Integer Number of Atoms in ..... (Resd 6 )   | 0.50           | Check        |
| PLAT304_ALERT_4_G | Non-Integer Number of Atoms in ..... (Resd 7 )   | 0.25           | Check        |
| PLAT304_ALERT_4_G | Non-Integer Number of Atoms in ..... (Resd 9 )   | 0.12           | Check        |
| PLAT304_ALERT_4_G | Non-Integer Number of Atoms in ..... (Resd 10 )  | 0.17           | Check        |
| PLAT304_ALERT_4_G | Non-Integer Number of Atoms in ..... (Resd 11 )  | 0.25           | Check        |
| PLAT304_ALERT_4_G | Non-Integer Number of Atoms in ..... (Resd 12 )  | 0.12           | Check        |
| PLAT304_ALERT_4_G | Non-Integer Number of Atoms in ..... (Resd 13 )  | 0.08           | Check        |
| PLAT311_ALERT_2_G | Isolated Disordered Oxygen Atom (No H's ?) ..... | 02W            | Check        |
| PLAT311_ALERT_2_G | Isolated Disordered Oxygen Atom (No H's ?) ..... | 05W            | Check        |
| PLAT311_ALERT_2_G | Isolated Disordered Oxygen Atom (No H's ?) ..... | 06W            | Check        |

|                   |                                                  |        |              |
|-------------------|--------------------------------------------------|--------|--------------|
| PLAT311_ALERT_2_G | Isolated Disordered Oxygen Atom (No H's ?)       | .....  | O4W Check    |
| PLAT311_ALERT_2_G | Isolated Disordered Oxygen Atom (No H's ?)       | .....  | O8W Check    |
| PLAT311_ALERT_2_G | Isolated Disordered Oxygen Atom (No H's ?)       | .....  | O9W Check    |
| PLAT311_ALERT_2_G | Isolated Disordered Oxygen Atom (No H's ?)       | .....  | O11W Check   |
| PLAT311_ALERT_2_G | Isolated Disordered Oxygen Atom (No H's ?)       | .....  | O12W Check   |
| PLAT395_ALERT_2_G | Deviating X-O-Y Angle From 120 for O3W           | .      | 85.6 Degree  |
| PLAT395_ALERT_2_G | Deviating X-O-Y Angle From 120 for O1W           | .      | 60.0 Degree  |
| PLAT432_ALERT_2_G | Short Inter X...Y Contact O2 ..C25               | .      | 2.99 Ang.    |
|                   | z,1-x,1/2-y =                                    | 14_565 | Check        |
| PLAT432_ALERT_2_G | Short Inter X...Y Contact O5W ..C23              | .      | 3.01 Ang.    |
|                   | z,1-x,1/2-y =                                    | 14_565 | Check        |
| PLAT764_ALERT_4_G | Overcomplete CIF Bond List Detected (Rep/Expd)   | .      | 1.11 Ratio   |
| PLAT860_ALERT_3_G | Number of Least-Squares Restraints               | .....  | 24 Note      |
| PLAT883_ALERT_1_G | No Info/Value for _atom_sites_solution_primary   | .      | Please Do !  |
| PLAT910_ALERT_3_G | Missing # of FCF Reflection(s) Below Theta(Min)  | .      | 1 Note       |
| PLAT933_ALERT_2_G | Number of HKL-OMIT Records in Embedded .res File | .      | 6 Note       |
| PLAT955_ALERT_1_G | Reported (CIF) and Actual (FCF) Lmax Differ by   | .      | 1 Units      |
| PLAT961_ALERT_5_G | Dataset Contains no Negative Intensities         | .....  | Please Check |
| PLAT965_ALERT_2_G | The SHELXL WEIGHT Optimisation has not Converged |        | Please Check |

---

0 **ALERT level A** = Most likely a serious problem - resolve or explain  
 3 **ALERT level B** = A potentially serious problem, consider carefully  
 12 **ALERT level C** = Check. Ensure it is not caused by an omission or oversight  
 60 **ALERT level G** = General information/check it is not something unexpected

9 ALERT type 1 CIF construction/syntax error, inconsistent or missing data  
 27 ALERT type 2 Indicator that the structure model may be wrong or deficient  
 3 ALERT type 3 Indicator that the structure quality may be low  
 35 ALERT type 4 Improvement, methodology, query or suggestion  
 1 ALERT type 5 Informative message, check

---

It is advisable to attempt to resolve as many as possible of the alerts in all categories. Often the minor alerts point to easily fixed oversights, errors and omissions in your CIF or refinement strategy, so attention to these fine details can be worthwhile. In order to resolve some of the more serious problems it may be necessary to carry out additional measurements or structure refinements. However, the purpose of your study may justify the reported deviations and the more serious of these should normally be commented upon in the discussion or experimental section of a paper or in the "special\_details" fields of the CIF. checkCIF was carefully designed to identify outliers and unusual parameters, but every test has its limitations and alerts that are not important in a particular case may appear. Conversely, the absence of alerts does not guarantee there are no aspects of the results needing attention. It is up to the individual to critically assess their own results and, if necessary, seek expert advice.

### **Publication of your CIF in IUCr journals**

A basic structural check has been run on your CIF. These basic checks will be run on all CIFs submitted for publication in IUCr journals (*Acta Crystallographica*, *Journal of Applied Crystallography*, *Journal of Synchrotron Radiation*); however, if you intend to submit to *Acta Crystallographica Section C* or *E* or *IUCrData*, you should make sure that full publication checks are run on the final version of your CIF prior to submission.

### **Publication of your CIF in other journals**

Please refer to the *Notes for Authors* of the relevant journal for any special instructions relating to CIF submission.

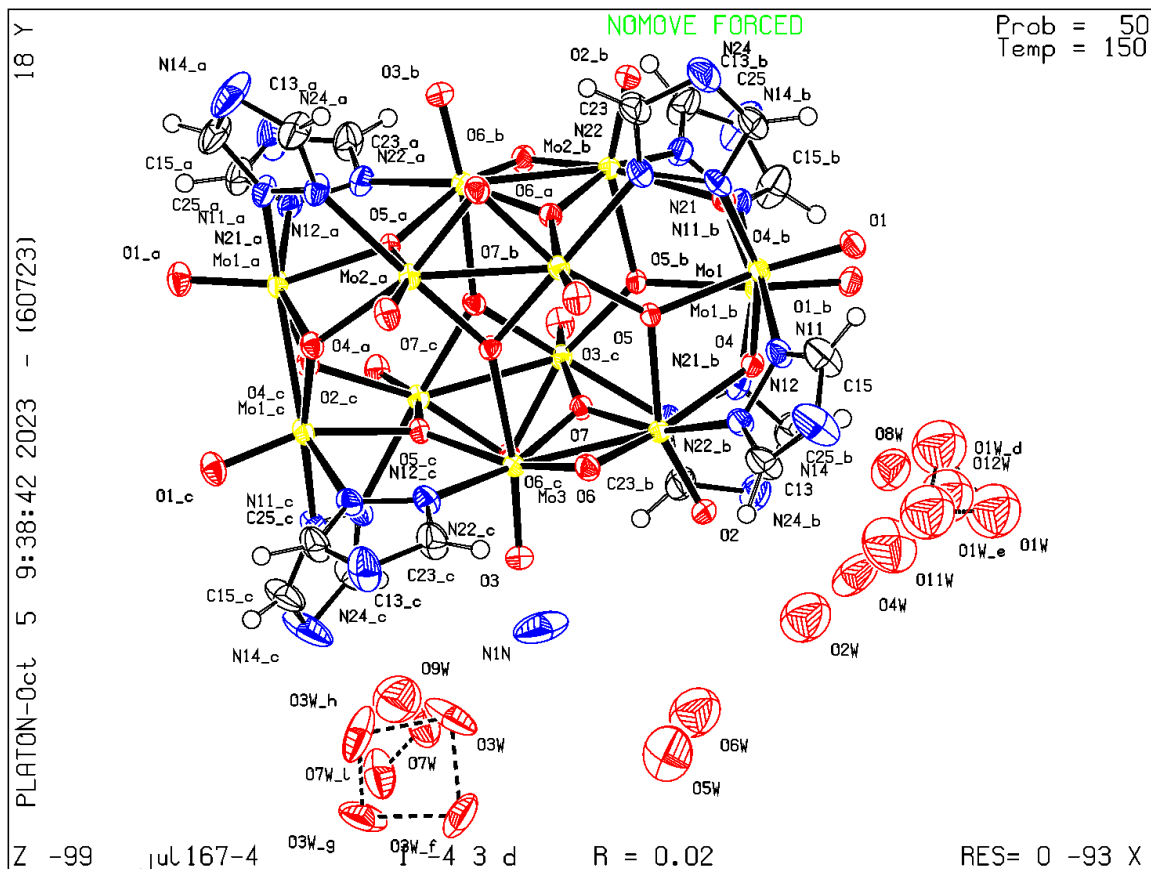

Supplement: s1 [file s1]
