# Supplementary material for: Water-Soluble Polyoxometal Clusters of Molybdenum (V) with Pyrazole and Triazole: Synthesis and Study of Cytotoxicity and Antiviral Activity
Source: MDPI journal article supplement (doi:10.3390/molecules28248079), 2023-12-14

## checkCIF/PLATON report

Structure factors have been supplied for datablock(s) jul167-3

THIS REPORT IS FOR GUIDANCE ONLY. IF USED AS PART OF A REVIEW PROCEDURE FOR PUBLICATION, IT SHOULD NOT REPLACE THE EXPERTISE OF AN EXPERIENCED CRYSTALLOGRAPHIC REFEREE.

No syntax errors found.      CIF dictionary      Interpreting this report

### Datablock: jul167-3

---

Bond precision:      C-C = 0.0064 Å      Wavelength=0.71073

Cell:                      a=11.7496(4)              b=21.5118(7)              c=22.6938(7)  
                             alpha=90              beta=102.174(1)              gamma=90

Temperature:              150 K

|                        | Calculated                       | Reported                              |
|------------------------|----------------------------------|---------------------------------------|
| Volume                 | 5607.0(3)                        | 5607.0(3)                             |
| Space group            | P 21/n                           | P 21/n                                |
| Hall group             | -P 2yn                           | -P 2yn                                |
| Moiety formula         | C16 H16 Mo12 N24 O28, 4(O), 4(N) | C16 H16 Mo12 N24 O28, 4(H2O), 4(N H4) |
| Sum formula            | C16 H16 Mo12 N28 O32             | C16 H40 Mo12 N28 O32                  |
| Mr                     | 2263.85                          | 2288.04                               |
| Dx, g cm <sup>-3</sup> | 2.682                            | 2.710                                 |
| Z                      | 4                                | 4                                     |
| Mu (mm <sup>-1</sup> ) | 2.695                            | 2.696                                 |
| F000                   | 4272.0                           | 4368.0                                |
| F000'                  | 4190.75                          |                                       |
| h,k,lmax               | 18,33,34                         | 18,33,34                              |
| Nref                   | 21393                            | 21345                                 |
| Tmin,Tmax              | 0.772,0.806                      | 0.612,0.747                           |
| Tmin'                  | 0.764                            |                                       |

Correction method= # Reported T Limits: Tmin=0.612 Tmax=0.747  
AbsCorr = MULTI-SCAN

Data completeness= 0.998              Theta(max)= 33.158

R(reflections)= 0.0385( 16050)

wR2(reflections)=  
0.0914( 21345)

S = 1.063

Npar= 832

---

The following ALERTS were generated. Each ALERT has the format  
**test-name\_ALERT\_alert-type\_alert-level.**  
Click on the hyperlinks for more details of the test.

---

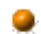

### Alert level B

PLAT043\_ALERT\_1\_B Calculated and Reported Mol. Weight Differ by .. 24.19 Check

**Author Response: Reported formula contain 24 unlocalized H atoms of 4 disordered solvate water molecules and 4 ammonia cations.**

PLAT430\_ALERT\_2\_B Short Inter D...A Contact O1WA ..N2N . 2.75 Ang.  
x,y,z = 1\_555 Check

**Author Response: The H atoms of the disordered solvate water molecules and ammonia cations are not localized. This contact corresponds to the H bond.**

PLAT430\_ALERT\_2\_B Short Inter D...A Contact O1WA ..N3N . 2.77 Ang.  
x,y,z = 1\_555 Check

**Author Response: The H atoms of the disordered solvate water molecules and ammonia cations are not localized. This contact corresponds to the H bond.**

PLAT430\_ALERT\_2\_B Short Inter D...A Contact O1WA ..O25 . 2.82 Ang.  
x,y,z = 1\_555 Check

**Author Response: The H atoms of the disordered solvate water molecules and ammonia cations are not localized. This contact corresponds to the H bond.**

PLAT430\_ALERT\_2\_B Short Inter D...A Contact O4 ..O2WB . 2.82 Ang.  
1/2-x,-1/2+y,3/2-z = 2\_546 Check

**Author Response: The H atoms of the disordered solvate water molecules and ammonia cations are not localized. This contact corresponds to the H bond.**

PLAT430\_ALERT\_2\_B Short Inter D...A Contact O2WB ..O9 . 2.76 Ang.  
-1+x,y,z = 1\_455 Check

**Author Response: The H atoms of the disordered solvate water molecules and ammonia cations are not localized. This contact corresponds to the H bond.**

PLAT430\_ALERT\_2\_B Short Inter D...A Contact O5 ..O4WB . 2.79 Ang.  
x,y,z = 1\_555 Check

**Author Response: The H atoms of the disordered solvate water molecules and ammonia cations are not localized. This contact corresponds to the H bond.**

PLAT430\_ALERT\_2\_B Short Inter D...A Contact O3WA ..N73 . 2.70 Ang.  
 $3/2-x, 1/2+y, 3/2-z = 2\_656$  Check

**Author Response: The H atoms of the disordered solvate water molecules and ammonia cations are not localized. This contact corresponds to the H bond.**

PLAT430\_ALERT\_2\_B Short Inter D...A Contact O7 ..N4NB . 2.80 Ang.  
 $x, y, z = 1\_555$  Check

**Author Response: The H atoms of the disordered solvate water molecules and ammonia cations are not localized. This contact corresponds to the H bond.**

PLAT430\_ALERT\_2\_B Short Inter D...A Contact O7 ..N1N . 2.86 Ang.  
 $x, y, z = 1\_555$  Check

**Author Response: The H atoms of the disordered solvate water molecules and ammonia cations are not localized. This contact corresponds to the H bond.**

PLAT430\_ALERT\_2\_B Short Inter D...A Contact O9 ..N4NA . 2.79 Ang.  
 $1+x, y, z = 1\_655$  Check

**Author Response: The H atoms of the disordered solvate water molecules and ammonia cations are not localized. This contact corresponds to the H bond.**

PLAT430\_ALERT\_2\_B Short Inter D...A Contact O25 ..O1WB . 2.72 Ang.  
 $x, y, z = 1\_555$  Check

**Author Response: The H atoms of the disordered solvate water molecules and ammonia cations are not localized. This contact corresponds to the H bond.**

PLAT430\_ALERT\_2\_B Short Inter D...A Contact O26 ..N4NA . 2.59 Ang.  
 $x, y, z = 1\_555$  Check

**Author Response: The H atoms of the disordered solvate water molecules and ammonia cations are not localized. This contact corresponds to the H bond.**

PLAT430\_ALERT\_2\_B Short Inter D...A Contact O27 ..N1N . 2.76 Ang.  
 $1/2-x, -1/2+y, 3/2-z = 2\_546$  Check

**Author Response: The H atoms of the disordered solvate water molecules and ammonia cations are not localized. This contact corresponds to the H bond.**

PLAT430\_ALERT\_2\_B Short Inter D...A Contact O28 ..N3N . 2.71 Ang.  
 $3/2-x, -1/2+y, 3/2-z = 2\_646$  Check

**Author Response: The H atoms of the disordered solvate water molecules and ammonia cations are not localized. This contact corresponds to the H bond.**

PLAT430\_ALERT\_2\_B Short Inter D...A Contact N1N ..N2N . 2.66 Ang.  
 $x, y, z = 1\_555$  Check

**Author Response: The H atoms of the disordered solvate water molecules and ammonia cations are not localized. This contact corresponds to the H bond.**

PLAT430\_ALERT\_2\_B Short Inter D...A Contact O4WC ..O4WD . 2.80 Ang.  
 $x, y, z = 1\_555$  Check

**Author Response: The H atoms of the disordered solvate water molecules and ammonia cations are not localized. This contact corresponds to the H bond.**

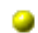

#### Alert level C

PLAT041\_ALERT\_1\_C Calc. and Reported SumFormula Strings Differ Please Check  
 PLAT068\_ALERT\_1\_C Reported F000 Differs from Calcd (or Missing)... Please Check  
 PLAT230\_ALERT\_2\_C Hirshfeld Test Diff for C34 --C35 . 6.8 s.u.  
 PLAT241\_ALERT\_2\_C High 'MainMol' Ueq as Compared to Neighbors of C54 Check  
 PLAT411\_ALERT\_2\_C Short Inter H...H Contact H25A ..H65 . 2.12 Ang.  
 $-1/2+x, 1/2-y, -1/2+z = 4\_565$  Check  
 PLAT430\_ALERT\_2\_C Short Inter D...A Contact O5 ..O4WC . 2.87 Ang.  
 $x, y, z = 1\_555$  Check

**Author Response: The H atoms of the disordered solvate water molecules and ammonia cations are not localized. This contact corresponds to the H bond.**

PLAT430\_ALERT\_2\_C Short Inter D...A Contact O8 ..O4WB . 2.89 Ang.  
 $3/2-x, -1/2+y, 3/2-z = 2\_646$  Check

**Author Response: The H atoms of the disordered solvate water molecules and ammonia cations are not localized. This contact corresponds to the H bond.**

PLAT430\_ALERT\_2\_C Short Inter D...A Contact O12 ..N2N . 2.90 Ang.  
 $1/2+x, 1/2-y, 1/2+z = 4\_666$  Check

**Author Response: The H atoms of the disordered solvate water molecules and ammonia cations are not localized. This contact corresponds to the H bond.**

|                   |                                                 |       |        |
|-------------------|-------------------------------------------------|-------|--------|
| PLAT906_ALERT_3_C | Large K Value in the Analysis of Variance ..... | 3.148 | Check  |
| PLAT911_ALERT_3_C | Missing FCF Refl Between Thmin & STh/L= 0.600   | 18    | Report |
| PLAT972_ALERT_2_C | Check Calcd Resid. Dens. 0.62Ang From Mol1      | -1.72 | eA-3   |
| PLAT973_ALERT_2_C | Check Calcd Positive Resid. Density on Mol1     | 1.02  | eA-3   |
| PLAT975_ALERT_2_C | Check Calcd Resid. Dens. 0.77Ang From N1N       | 1.04  | eA-3   |
| PLAT975_ALERT_2_C | Check Calcd Resid. Dens. 0.76Ang From N2N       | 1.03  | eA-3   |
| PLAT975_ALERT_2_C | Check Calcd Resid. Dens. 0.87Ang From O4WD      | 0.84  | eA-3   |
| PLAT975_ALERT_2_C | Check Calcd Resid. Dens. 0.76Ang From N3N       | 0.82  | eA-3   |
| PLAT977_ALERT_2_C | Check Negative Difference Density on H14        | -0.45 | eA-3   |
| PLAT977_ALERT_2_C | Check Negative Difference Density on H25A       | -0.38 | eA-3   |
| PLAT977_ALERT_2_C | Check Negative Difference Density on H35        | -0.43 | eA-3   |
| PLAT977_ALERT_2_C | Check Negative Difference Density on H65        | -0.57 | eA-3   |
| PLAT977_ALERT_2_C | Check Negative Difference Density on H83        | -0.43 | eA-3   |

### Alert level G

FORMU01\_ALERT\_2\_G There is a discrepancy between the atom counts in the  
     \_chemical\_formula\_sum and the formula from the \_atom\_site\* data.  
     Atom count from \_chemical\_formula\_sum: C16 H40 Mo12 N28 O32  
     Atom count from the \_atom\_site data: C16 H16 Mo12 N28 O32

CELLZ01\_ALERT\_1\_G Difference between formula and atom\_site contents detected.

CELLZ01\_ALERT\_1\_G WARNING: H atoms missing from atom site list. Is this intentional?  
     From the CIF: \_cell\_formula\_units\_Z 4  
     From the CIF: \_chemical\_formula\_sum C16 H40 Mo12 N28 O32  
     TEST: Compare cell contents of formula and atom\_site data

| atom | Z*formula | cif sites | diff  |
|------|-----------|-----------|-------|
| C    | 64.00     | 64.00     | 0.00  |
| H    | 160.00    | 64.00     | 96.00 |
| Mo   | 48.00     | 48.00     | 0.00  |
| N    | 112.00    | 112.00    | 0.00  |
| O    | 128.00    | 128.00    | 0.00  |

|                   |                                                  |      |        |
|-------------------|--------------------------------------------------|------|--------|
| PLAT003_ALERT_2_G | Number of Uiso or Uij Restrained non-H Atoms ... | 5    | Report |
| PLAT171_ALERT_4_G | The CIF-Embedded .res File Contains EADP Records | 4    | Report |
| PLAT186_ALERT_4_G | The CIF-Embedded .res File Contains ISOR Records | 2    | Report |
| PLAT300_ALERT_4_G | Atom Site Occupancy of O1WA Constrained at       | 0.75 | Check  |
| PLAT300_ALERT_4_G | Atom Site Occupancy of O2WA Constrained at       | 0.5  | Check  |
| PLAT300_ALERT_4_G | Atom Site Occupancy of O2WB Constrained at       | 0.5  | Check  |
| PLAT300_ALERT_4_G | Atom Site Occupancy of O3WA Constrained at       | 0.5  | Check  |
| PLAT300_ALERT_4_G | Atom Site Occupancy of O3WB Constrained at       | 0.5  | Check  |
| PLAT300_ALERT_4_G | Atom Site Occupancy of N4NA Constrained at       | 0.5  | Check  |
| PLAT300_ALERT_4_G | Atom Site Occupancy of N4NB Constrained at       | 0.5  | Check  |
| PLAT300_ALERT_4_G | Atom Site Occupancy of O1WB Constrained at       | 0.25 | Check  |
| PLAT300_ALERT_4_G | Atom Site Occupancy of O4WA Constrained at       | 0.25 | Check  |
| PLAT300_ALERT_4_G | Atom Site Occupancy of O4WB Constrained at       | 0.25 | Check  |
| PLAT300_ALERT_4_G | Atom Site Occupancy of O4WC Constrained at       | 0.25 | Check  |
| PLAT300_ALERT_4_G | Atom Site Occupancy of O4WD Constrained at       | 0.25 | Check  |
| PLAT302_ALERT_4_G | Anion/Solvent/Minor-Residue Disorder (Resd 2 )   | 100% | Note   |
| PLAT302_ALERT_4_G | Anion/Solvent/Minor-Residue Disorder (Resd 3 )   | 100% | Note   |
| PLAT302_ALERT_4_G | Anion/Solvent/Minor-Residue Disorder (Resd 4 )   | 100% | Note   |
| PLAT302_ALERT_4_G | Anion/Solvent/Minor-Residue Disorder (Resd 5 )   | 100% | Note   |
| PLAT302_ALERT_4_G | Anion/Solvent/Minor-Residue Disorder (Resd 6 )   | 100% | Note   |
| PLAT302_ALERT_4_G | Anion/Solvent/Minor-Residue Disorder (Resd 7 )   | 100% | Note   |
| PLAT302_ALERT_4_G | Anion/Solvent/Minor-Residue Disorder (Resd 9 )   | 100% | Note   |
| PLAT302_ALERT_4_G | Anion/Solvent/Minor-Residue Disorder (Resd 12 )  | 100% | Note   |
| PLAT302_ALERT_4_G | Anion/Solvent/Minor-Residue Disorder (Resd 13 )  | 100% | Note   |
| PLAT302_ALERT_4_G | Anion/Solvent/Minor-Residue Disorder (Resd 14 )  | 100% | Note   |

|                   |                                                  |              |
|-------------------|--------------------------------------------------|--------------|
| PLAT302_ALERT_4_G | Anion/Solvent/Minor-Residue Disorder (Resd 15 )  | 100% Note    |
| PLAT302_ALERT_4_G | Anion/Solvent/Minor-Residue Disorder (Resd 16 )  | 100% Note    |
| PLAT304_ALERT_4_G | Non-Integer Number of Atoms in ..... (Resd 2 )   | 0.75 Check   |
| PLAT304_ALERT_4_G | Non-Integer Number of Atoms in ..... (Resd 3 )   | 0.50 Check   |
| PLAT304_ALERT_4_G | Non-Integer Number of Atoms in ..... (Resd 4 )   | 0.50 Check   |
| PLAT304_ALERT_4_G | Non-Integer Number of Atoms in ..... (Resd 5 )   | 0.50 Check   |
| PLAT304_ALERT_4_G | Non-Integer Number of Atoms in ..... (Resd 6 )   | 0.50 Check   |
| PLAT304_ALERT_4_G | Non-Integer Number of Atoms in ..... (Resd 7 )   | 0.50 Check   |
| PLAT304_ALERT_4_G | Non-Integer Number of Atoms in ..... (Resd 9 )   | 0.50 Check   |
| PLAT304_ALERT_4_G | Non-Integer Number of Atoms in ..... (Resd 12 )  | 0.25 Check   |
| PLAT304_ALERT_4_G | Non-Integer Number of Atoms in ..... (Resd 13 )  | 0.25 Check   |
| PLAT304_ALERT_4_G | Non-Integer Number of Atoms in ..... (Resd 14 )  | 0.25 Check   |
| PLAT304_ALERT_4_G | Non-Integer Number of Atoms in ..... (Resd 15 )  | 0.25 Check   |
| PLAT304_ALERT_4_G | Non-Integer Number of Atoms in ..... (Resd 16 )  | 0.25 Check   |
| PLAT311_ALERT_2_G | Isolated Disordered Oxygen Atom (No H's ?) ..... | 01WA Check   |
| PLAT311_ALERT_2_G | Isolated Disordered Oxygen Atom (No H's ?) ..... | 02WA Check   |
| PLAT311_ALERT_2_G | Isolated Disordered Oxygen Atom (No H's ?) ..... | 02WB Check   |
| PLAT311_ALERT_2_G | Isolated Disordered Oxygen Atom (No H's ?) ..... | 03WA Check   |
| PLAT311_ALERT_2_G | Isolated Disordered Oxygen Atom (No H's ?) ..... | 03WB Check   |
| PLAT311_ALERT_2_G | Isolated Disordered Oxygen Atom (No H's ?) ..... | 01WB Check   |
| PLAT311_ALERT_2_G | Isolated Disordered Oxygen Atom (No H's ?) ..... | 04WA Check   |
| PLAT311_ALERT_2_G | Isolated Disordered Oxygen Atom (No H's ?) ..... | 04WB Check   |
| PLAT311_ALERT_2_G | Isolated Disordered Oxygen Atom (No H's ?) ..... | 04WC Check   |
| PLAT311_ALERT_2_G | Isolated Disordered Oxygen Atom (No H's ?) ..... | 04WD Check   |
| PLAT432_ALERT_2_G | Short Inter X...Y Contact O2 ..C55 .             | 3.00 Ang.    |
|                   | -1/2+x,1/2-y,-1/2+z =                            | 4_565 Check  |
| PLAT720_ALERT_4_G | Number of Unusual/Non-Standard Labels .....      | 12 Note      |
| PLAT860_ALERT_3_G | Number of Least-Squares Restraints .....         | 30 Note      |
| PLAT883_ALERT_1_G | No Info/Value for _atom_sites_solution_primary . | Please Do !  |
| PLAT898_ALERT_4_G | Second Reported H-M Symbol in CIF Ignored .....  | ! Check      |
| PLAT910_ALERT_3_G | Missing # of FCF Reflection(s) Below Theta(Min). | 3 Note       |
| PLAT912_ALERT_4_G | Missing # of FCF Reflections Above STh/L= 0.600  | 28 Note      |
| PLAT913_ALERT_3_G | Missing # of Very Strong Reflections in FCF .... | 1 Note       |
| PLAT933_ALERT_2_G | Number of HKL-OMIT Records in Embedded .res File | 15 Note      |
| PLAT941_ALERT_3_G | Average HKL Measurement Multiplicity .....       | 3.5 Low      |
| PLAT961_ALERT_5_G | Dataset Contains no Negative Intensities .....   | Please Check |
| PLAT978_ALERT_2_G | Number C-C Bonds with Positive Residual Density. | 0 Info       |

---

0 **ALERT level A** = Most likely a serious problem - resolve or explain  
 17 **ALERT level B** = A potentially serious problem, consider carefully  
 21 **ALERT level C** = Check. Ensure it is not caused by an omission or oversight  
 64 **ALERT level G** = General information/check it is not something unexpected

6 ALERT type 1 CIF construction/syntax error, inconsistent or missing data  
 48 ALERT type 2 Indicator that the structure model may be wrong or deficient  
 6 ALERT type 3 Indicator that the structure quality may be low  
 41 ALERT type 4 Improvement, methodology, query or suggestion  
 1 ALERT type 5 Informative message, check

---

It is advisable to attempt to resolve as many as possible of the alerts in all categories. Often the minor alerts point to easily fixed oversights, errors and omissions in your CIF or refinement strategy, so attention to these fine details can be worthwhile. In order to resolve some of the more serious problems it may be necessary to carry out additional measurements or structure refinements. However, the purpose of your study may justify the reported deviations and the more serious of these should normally be commented upon in the discussion or experimental section of a paper or in the "special\_details" fields of the CIF. checkCIF was carefully designed to identify outliers and unusual parameters, but every test has its limitations and alerts that are not important in a particular case may appear. Conversely, the absence of alerts does not guarantee there are no aspects of the results needing attention. It is up to the individual to critically assess their own results and, if necessary, seek expert advice.

### **Publication of your CIF in IUCr journals**

A basic structural check has been run on your CIF. These basic checks will be run on all CIFs submitted for publication in IUCr journals (*Acta Crystallographica*, *Journal of Applied Crystallography*, *Journal of Synchrotron Radiation*); however, if you intend to submit to *Acta Crystallographica Section C* or *E* or *IUCrData*, you should make sure that full publication checks are run on the final version of your CIF prior to submission.

### **Publication of your CIF in other journals**

Please refer to the *Notes for Authors* of the relevant journal for any special instructions relating to CIF submission.

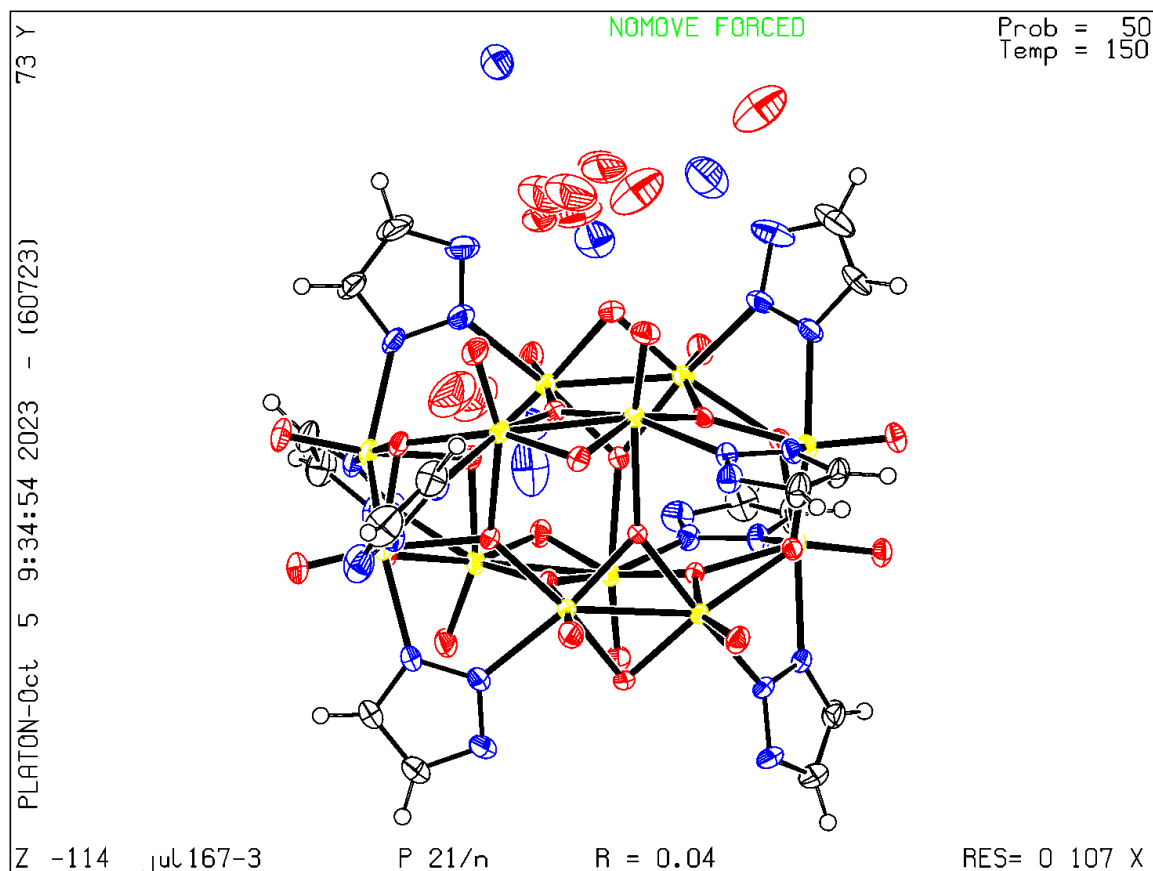

Supplement: s1 [file s1]
