# Supplementary material for: Water-Soluble Polyoxometal Clusters of Molybdenum (V) with Pyrazole and Triazole: Synthesis and Study of Cytotoxicity and Antiviral Activity
Source: MDPI journal article supplement (doi:10.3390/molecules28248079), 2023-12-14
Supplement: s1 [file s1]

# Water soluble polyoxometal clusters of molybdenum (V) with pyrazole and triazole: synthesis and study of cytotoxicity and antiviral activity

Anna V. Konkova <sup>1</sup>, Iulia V. Savina <sup>1</sup>, Darya V. Evtushok <sup>1</sup>, Tatiana N. Pozmogova <sup>1</sup>, Maria V. Solomatina <sup>2</sup>, Alina R. Nokhova <sup>2</sup>, Alexander Y. Alekseev <sup>2,3</sup>, Natalia V. Kuratieva <sup>1</sup>, Ilia V. Eltsov <sup>4</sup>, Vadim V. Yanshole <sup>5,6</sup>, Aleksander M. Shestopalov <sup>2,3</sup>, Anton A. Ivanov <sup>1,\*</sup>, Michael A. Shestopalov <sup>1</sup>

<sup>1</sup> Nikolaev Institute of Inorganic Chemistry SB RAS, 3 Acad. Lavrentiev Ave., 630090 Novosibirsk, Russia; [konkova@niic.nsc.ru](mailto:konkova@niic.nsc.ru) (A.V.K.); [savina@niic.nsc.ru](mailto:savina@niic.nsc.ru) (I.V.S.); [evtushok@niic.nsc.ru](mailto:evtushok@niic.nsc.ru) (D.V.E.); [pozmogova@niic.nsc.ru](mailto:pozmogova@niic.nsc.ru) (T.N.P.); [kuratieva@gmail.com](mailto:kuratieva@gmail.com) (N.V.K.); [ivanov338@niic.nsc.ru](mailto:ivanov338@niic.nsc.ru) (A.A.I.); [shtopy@niic.nsc.ru](mailto:shtopy@niic.nsc.ru) (M.A.S.)

<sup>2</sup> Research Institute of Virology, Federal Research Center of Fundamental and Translational Medicine, 2 Timakova St, 630117 Novosibirsk, Russia; [mariaza@ngs.ru](mailto:mariaza@ngs.ru) (M.V.S.); [alina-nohova@mail.ru](mailto:alina-nohova@mail.ru) (A.R.N.); [al-alexok@yandex.ru](mailto:al-alexok@yandex.ru) (A.Y.A.); [shestopalov2@mail.ru](mailto:shestopalov2@mail.ru) (A.M.S.);

<sup>3</sup> Research Institute of Applied Ecology, Dagestan State University, 43a Gadzhieva St, 367000 Makhachkala, Dagestan, Russia; [al-alexok@yandex.ru](mailto:al-alexok@yandex.ru) (A.Y.A.); [shestopalov2@mail.ru](mailto:shestopalov2@mail.ru) (A.M.S.);

<sup>4</sup> Department of Natural Sciences, Novosibirsk State University, 2 Pirogov Str., 630090 Novosibirsk, Russia; [eiv@fen.nsu.ru](mailto:eiv@fen.nsu.ru) (I.V.E.);

<sup>5</sup> Department of Physics, Novosibirsk State University, 1 Pirogova st., 630090 Novosibirsk, Russia; [vadim.yanshole@tomo.nsc.ru](mailto:vadim.yanshole@tomo.nsc.ru) (V.V.Y.);

<sup>6</sup> International Tomography Center SB RAS, 3a Institutskaya Str., 630090 Novosibirsk, Russia; [vadim.yanshole@tomo.nsc.ru](mailto:vadim.yanshole@tomo.nsc.ru) (V.V.Y.);

\* Correspondence: [ivanov338@niic.nsc.ru](mailto:ivanov338@niic.nsc.ru);

## TABLE OF CONTENT

|                                                     |    |
|-----------------------------------------------------|----|
| Crystal structure data .....                        | 3  |
| NMR and mass-spectrometry data for 1 .....          | 5  |
| NMR and mass-spectrometry data for 2 .....          | 10 |
| NMR and mass-spectrometry data for 3 .....          | 15 |
| NMR-spectra of 2 after precipitation with HCl.....  | 16 |
| UV-vis spectra of solutions in culture medium ..... | 17 |
| ICP-AES data.....                                   | 18 |
| IR spectra .....                                    | 19 |
| Thermogravimetric analysis.....                     | 21 |
| Powder X-ray diffraction analysis .....             | 23 |
| Crystal structure data .....                        | 25 |
| References .....                                    | 26 |

## Crystal structure data

**Table S1.** Main interatomic distances (Å) for **1**, **2** and **3** in comparison with literature data.

| Compound                                                                                                             | Mo–Mo                     | Mo–μ–O                | Mo–N                                                      | Ref        |
|----------------------------------------------------------------------------------------------------------------------|---------------------------|-----------------------|-----------------------------------------------------------|------------|
| <b>1</b>                                                                                                             | 2.5773(11)–<br>2.6225(12) | 1.916(7)–<br>1.990(7) | 2.143(8)–<br>2.197(9)                                     | This study |
| <b>1</b>                                                                                                             | 2.5803–<br>2.6014(9)      | 1.923(4)–<br>1.981(4) | 2.148(5)–<br>2.199(5)                                     | This study |
| <b>3</b>                                                                                                             | 2.5731(4)–<br>2.6036(4)   | 1.913(2)–<br>1.989(3) | 2.157(3)–<br>2.229(3)                                     | This study |
| [Mo <sup>V</sup> <sub>6</sub> Mo <sup>VI</sup> <sub>2</sub> (μ-pz) <sub>6</sub> O <sub>18</sub> (pzH) <sub>6</sub> ] | 2.5722(5)–<br>2.5752(4)   | 1.928(2)–<br>1.950(2) | μ-pz: 2.195(2)–<br>2.206(2)<br>pzH: 2.256(2)–<br>2.240(2) | 1          |
| [Mo <sub>8</sub> <sup>V</sup> Mo <sub>2</sub> <sup>VI</sup> O <sub>26</sub> (3-Me-Py) <sub>8</sub> ]                 | 2.5576(8)–<br>2.6128(8)   | 1.812(4)–<br>2.050(5) | 2.213(6)–<br>2.251(6)                                     | 2          |

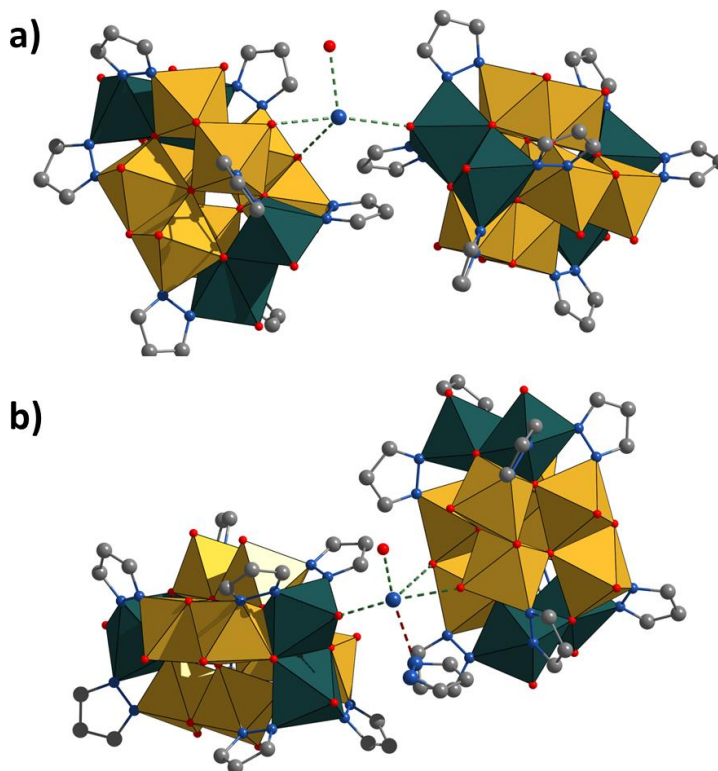

**Figure S1.** Hydrogen bonds observed in the crystal structure of **1**. Color code: O – red, C – gray, N – blue, Mo<sup>V</sup><sub>2</sub>O<sub>6</sub>N<sub>4</sub> – yellow edge-connected octahedrons, Mo<sup>V</sup>O<sub>8</sub>N<sub>2</sub> – blue-green edge-connected octahedrons, N...O – green dashed line, N...N – red dashed line.

a)

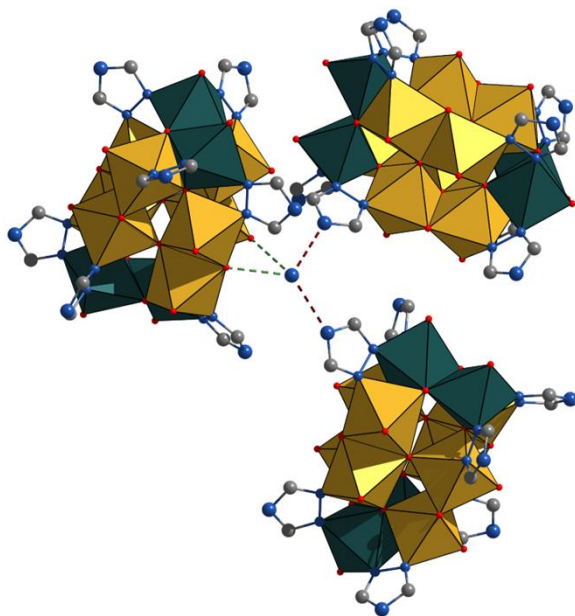

b)

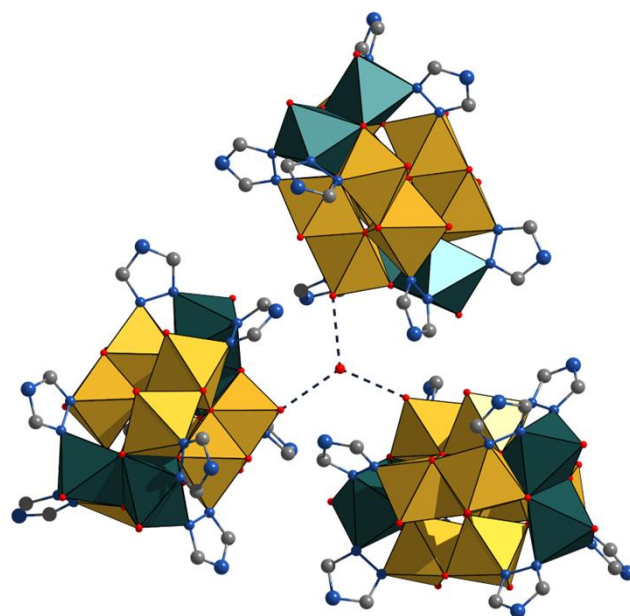

**Figure S2.** Hydrogen bonds observed in the crystal structure of **2**. Color code: O – red, C – gray, N – blue,  $\text{Mo}^{\text{V}}_2\text{O}_6\text{N}_4$  – yellow edge-connected octahedrons,  $\text{Mo}^{\text{V}}\text{O}_8\text{N}_2$  – blue-green edge-connected octahedrons,  $\text{N}\cdots\text{O}$  – green dashed line,  $\text{N}\cdots\text{N}$  – red dashed line,  $\text{O}\cdots\text{O}$  – blue dashed line.

## NMR and mass-spectrometry data for 1

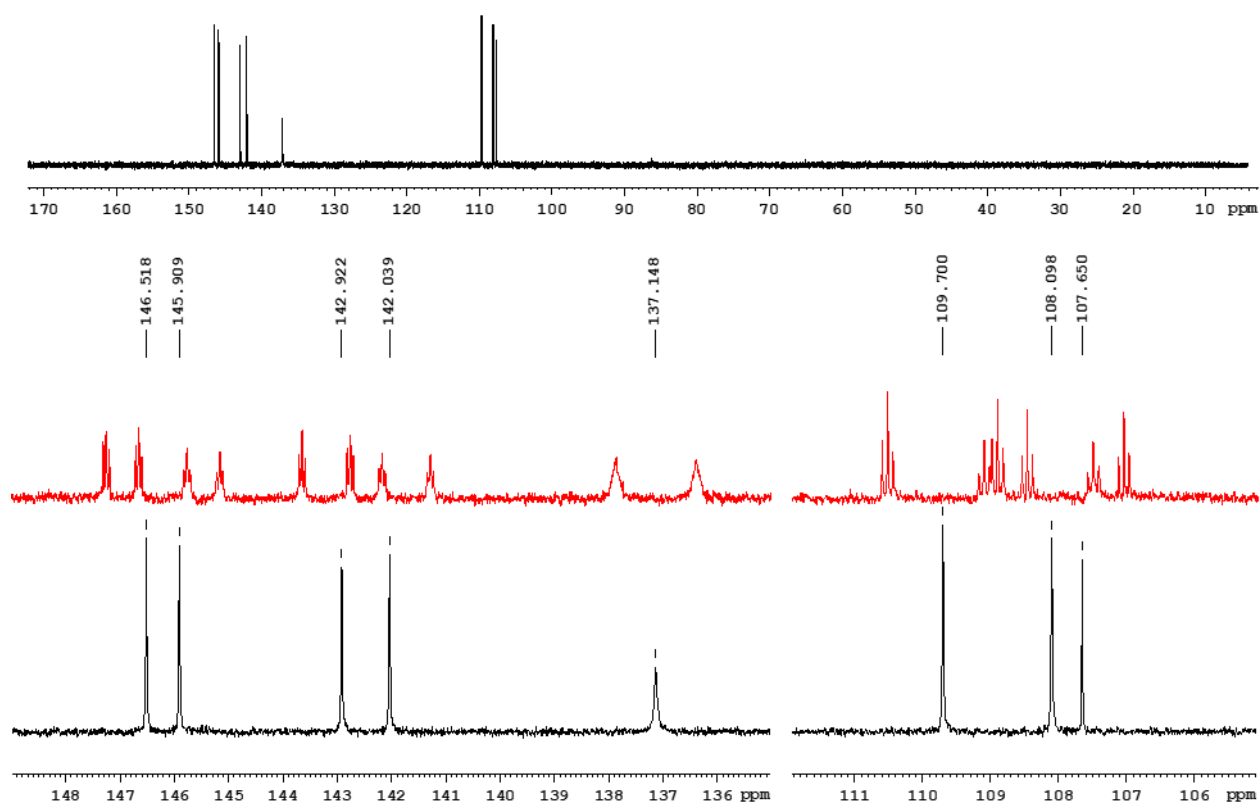

**Figure S3.** <sup>13</sup>C NMR (red) and <sup>13</sup>C{<sup>1</sup>H} (black) spectra of 1 in D<sub>2</sub>O.

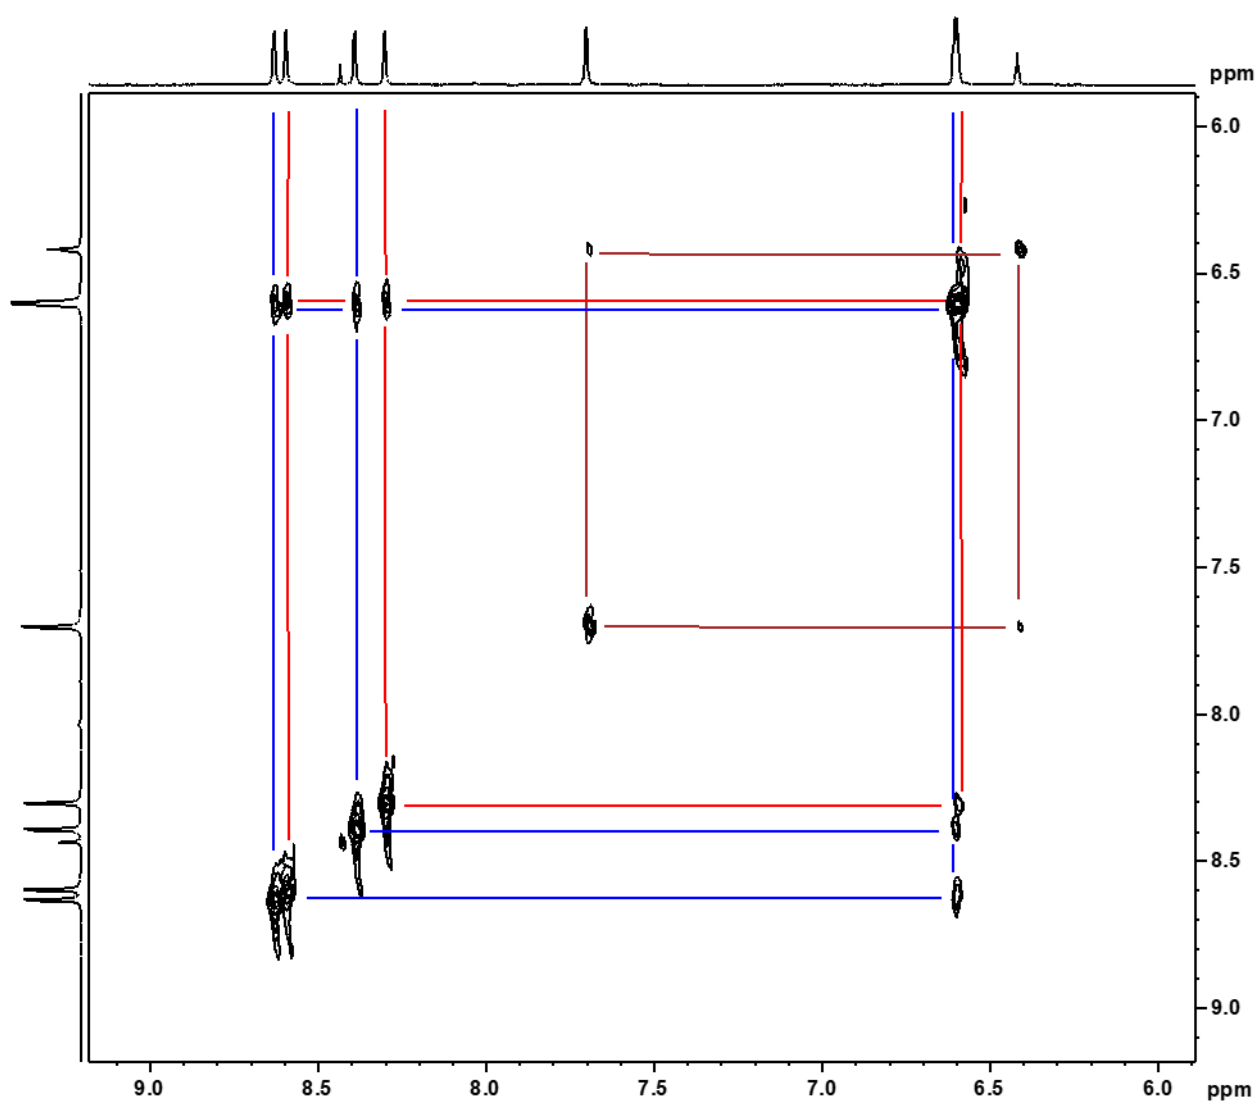

**Figure S4.**  $^1\text{H}$ ,  $^1\text{H}$ -NMR correlation spectra of **1** in  $\text{D}_2\text{O}$ .

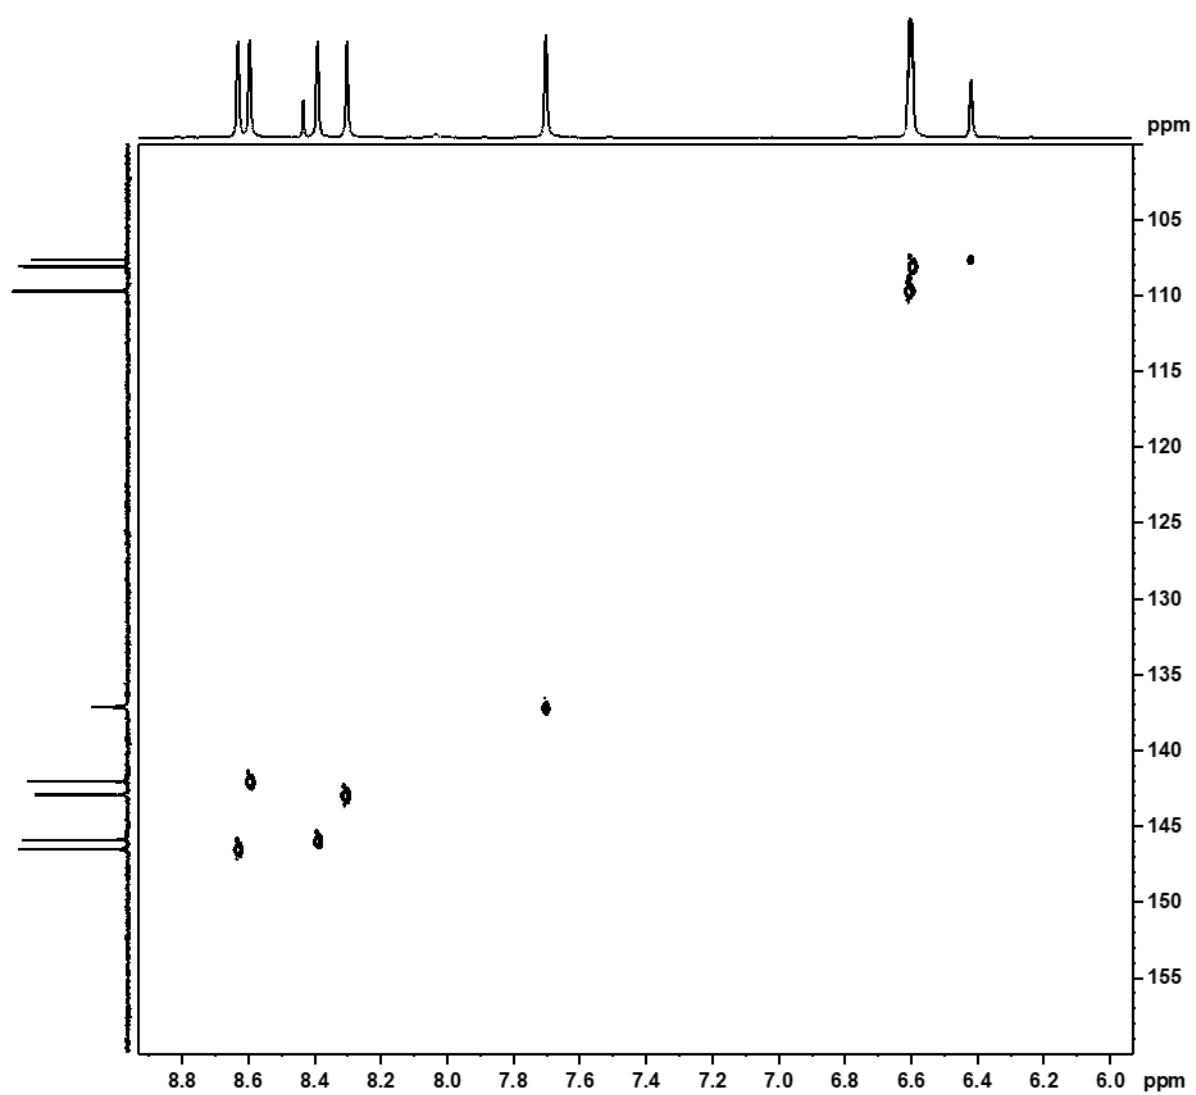

**Figure S5.** <sup>1</sup>H, <sup>13</sup>C-NMR correlation (HSQC) spectra of **1** in D<sub>2</sub>O.

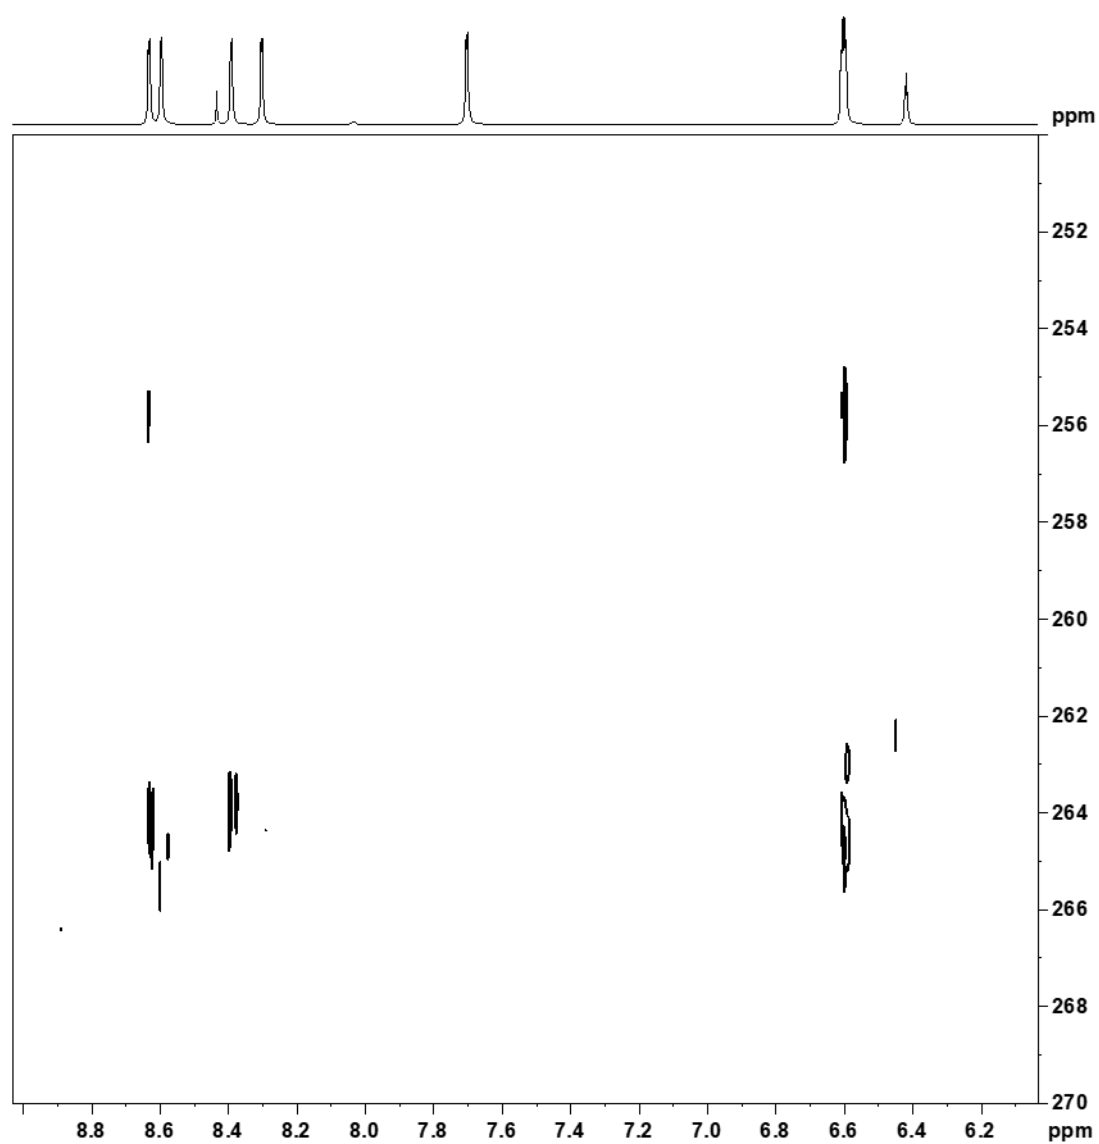

**Figure S6.**  $^1\text{H}$ - $^{15}\text{N}$  HMBC NMR spectra of **1** in  $\text{D}_2\text{O}$ .



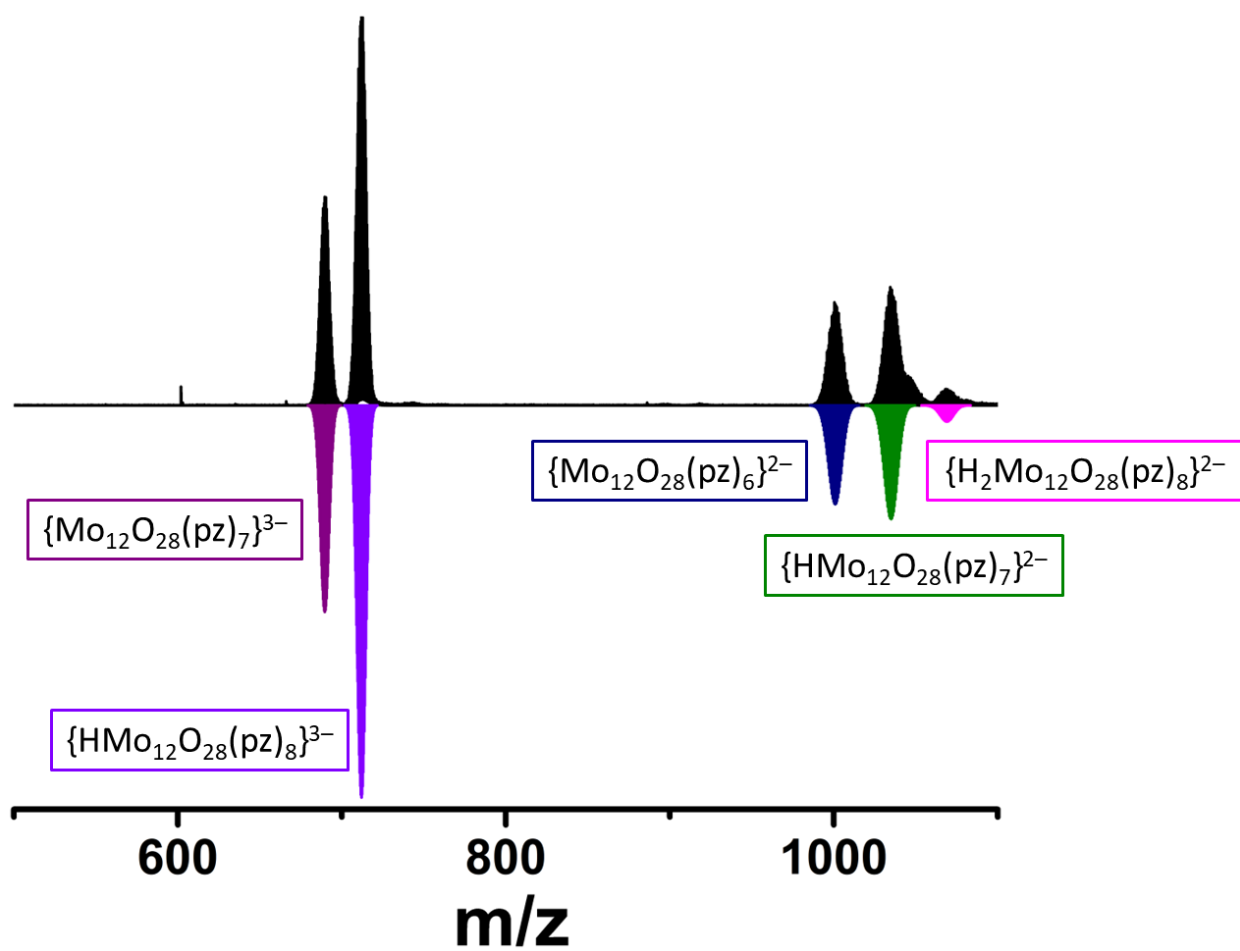

**Figure S7.** HR-ESI-MS spectrum of solution of **1** in water (black) and simulations of cluster forms (colored).

## NMR and mass-spectrometry data for 2

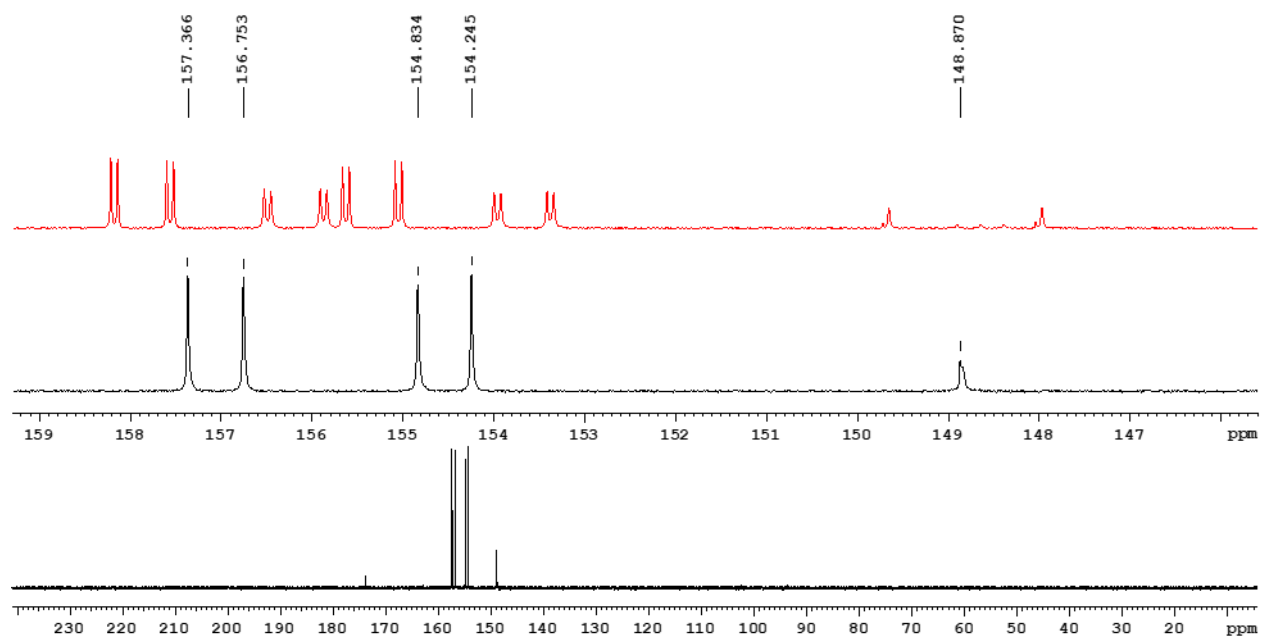

**Figure S8.** <sup>13</sup>C NMR (red) and <sup>13</sup>C{<sup>1</sup>H} (black) spectra of 2 in D<sub>2</sub>O.

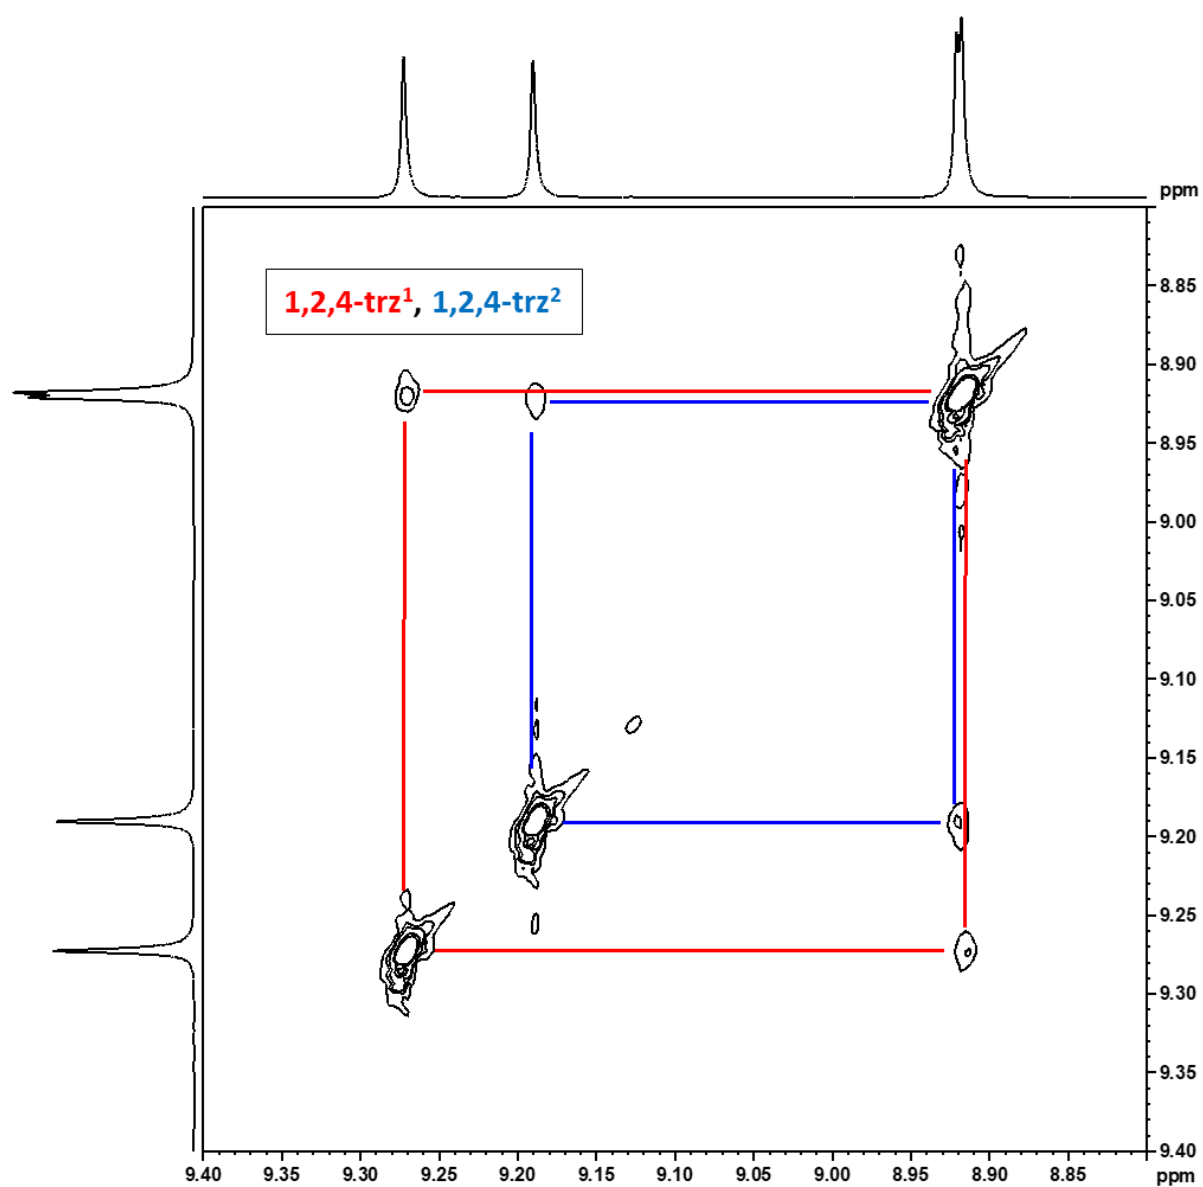

**Figure S9.**  $^1\text{H}$ ,  $^1\text{H}$ -NMR correlation spectra of **2** in  $\text{D}_2\text{O}$ .

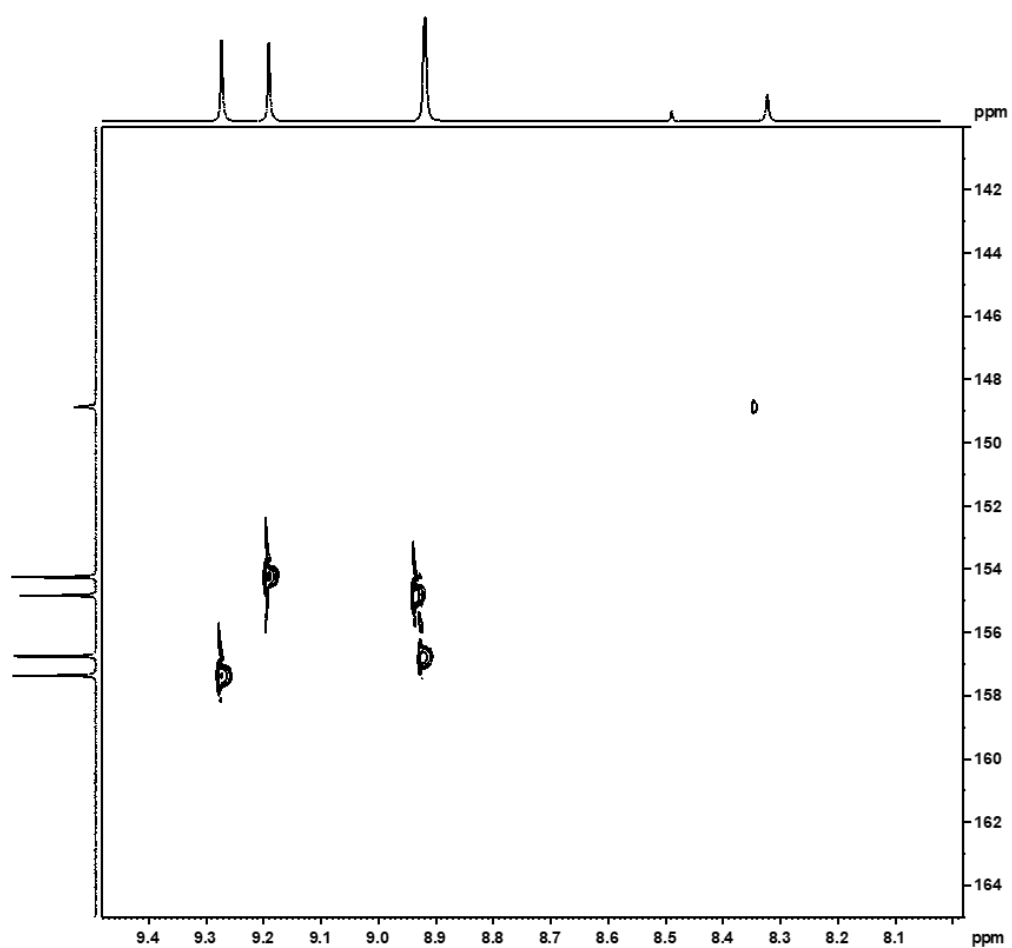

**Figure S10.**  $^1\text{H}$ ,  $^{13}\text{C}$ -NMR correlation (HSQC) spectra of **2** in  $\text{D}_2\text{O}$ .

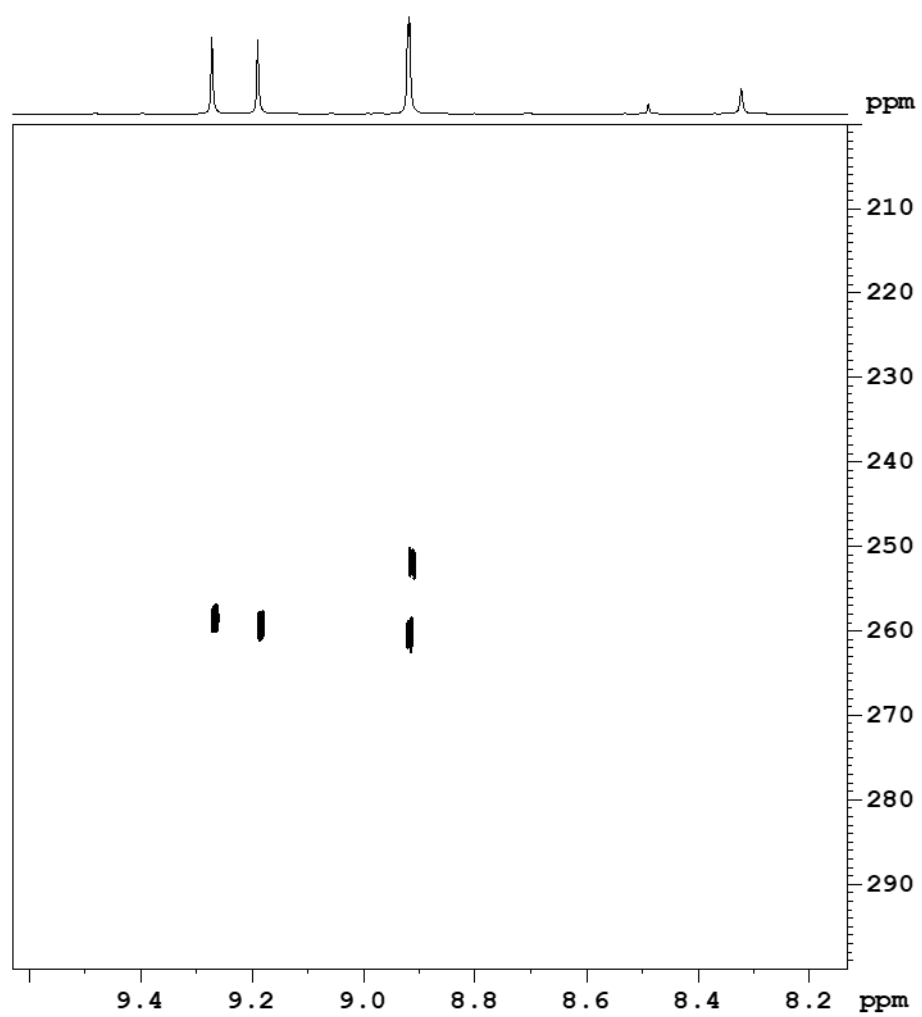

**Figure S11.**  $^1\text{H}$ - $^{15}\text{N}$  HMBC NMR spectra of **2** in  $\text{D}_2\text{O}$ .

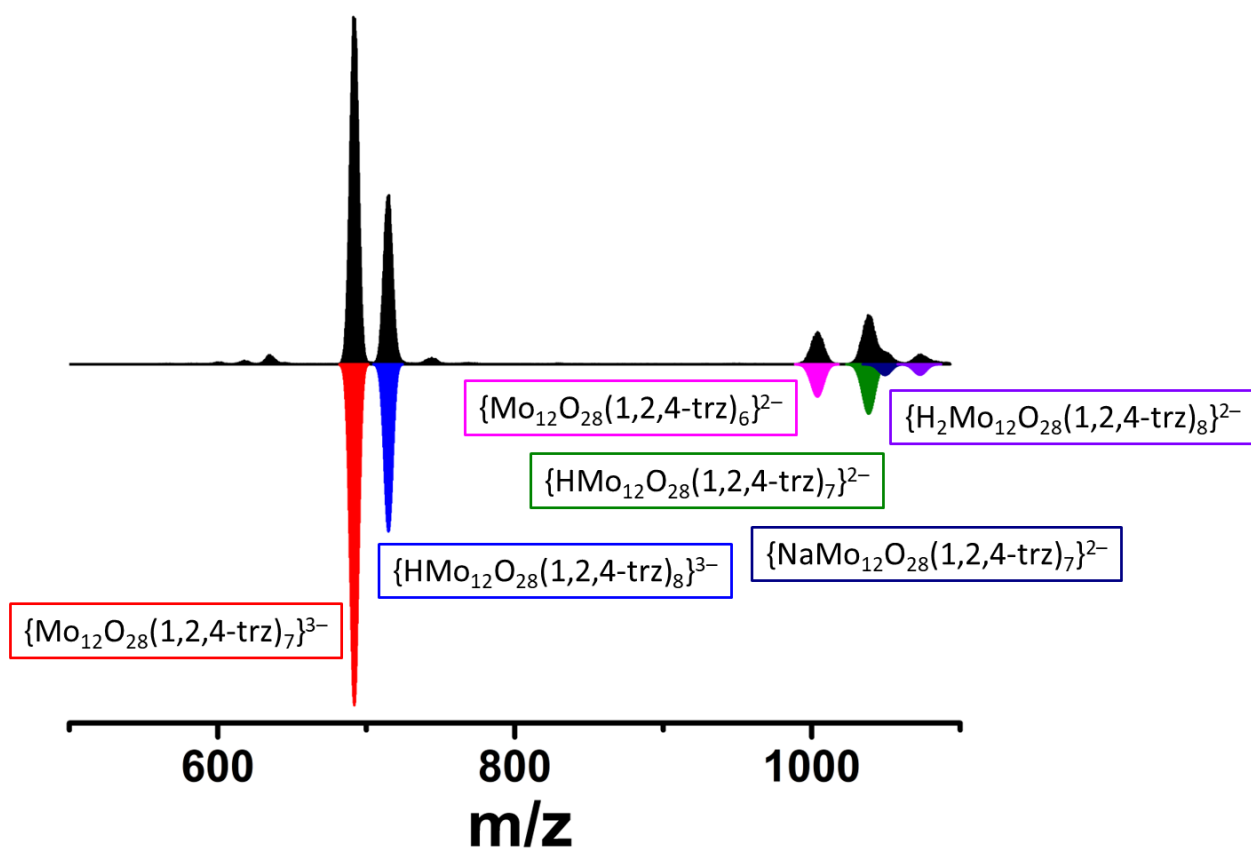

**Figure S12.** HR-ESI-MS spectrum of solution of **2** in water (black) and simulations of cluster forms (colored).

## NMR and mass-spectrometry data for **3**

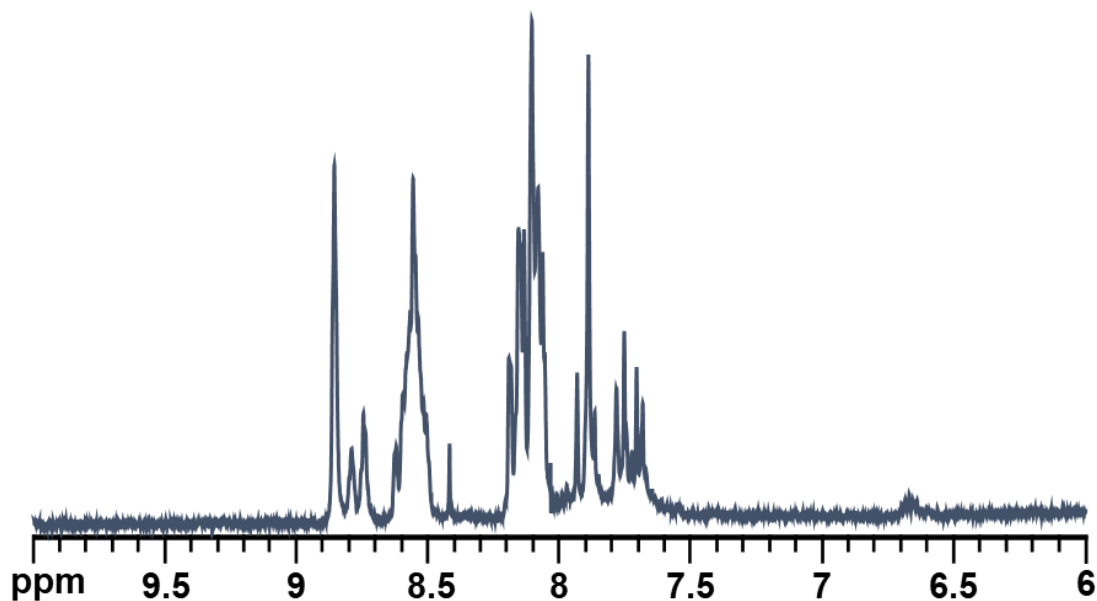

**Figure S13.**  $^1\text{H}$  NMR spectra of **3** in  $\text{D}_2\text{O}$ .

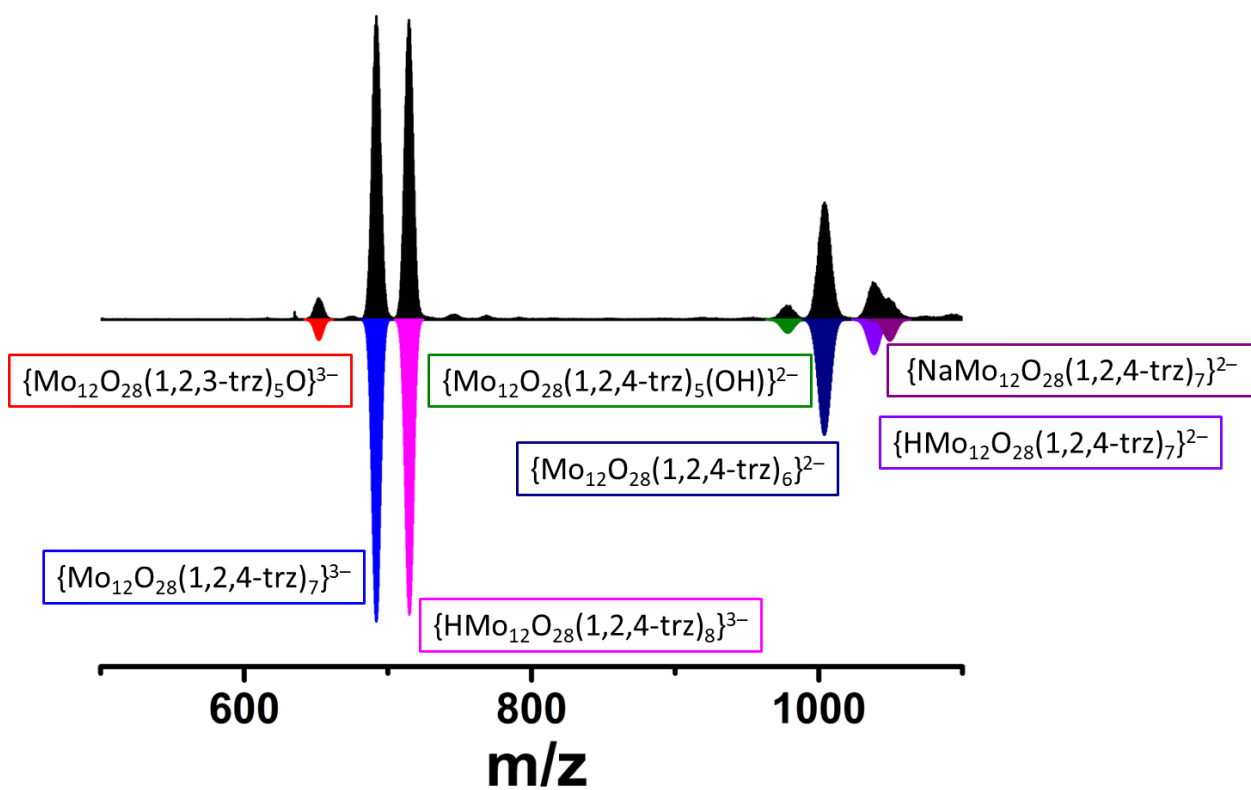

**Figure S14.** HR-ESI-MS spectrum of solution of **3** in water (black) and simulations of cluster forms (colored).

## NMR-spectra of 2 after precipitation with HCl

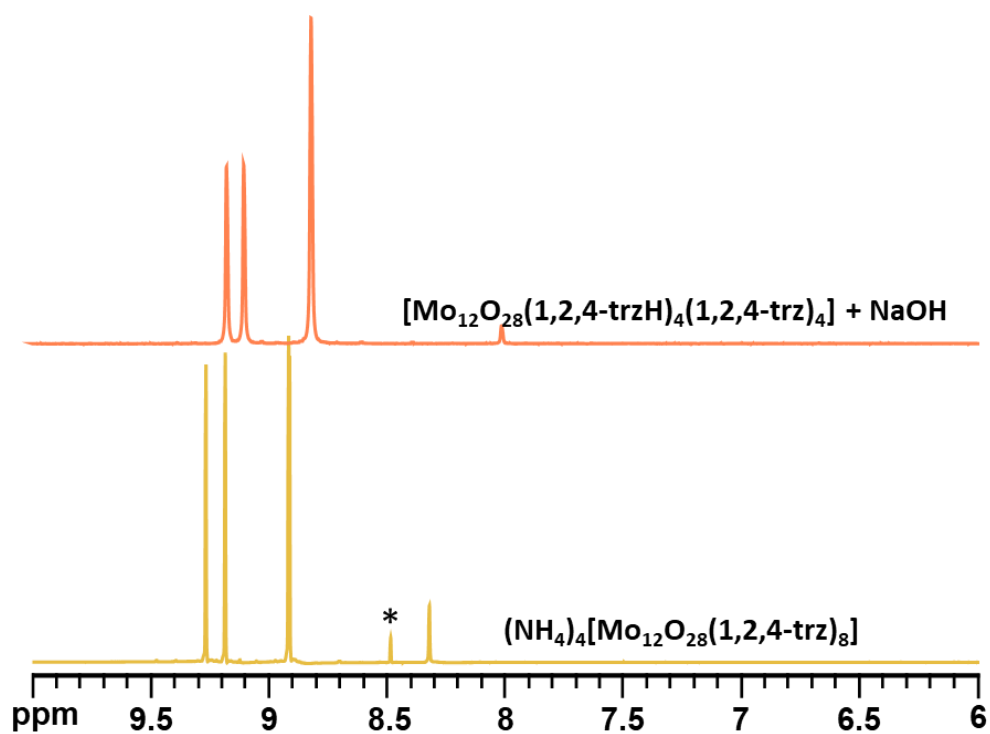

**Figure S15.**  $^1\text{H}$  NMR spectra of **2** before (bottom) precipitation with HCl and spectra of dissolved precipitate with NaOH (top) in  $\text{D}_2\text{O}$ .



## UV-vis spectra of solutions in culture medium

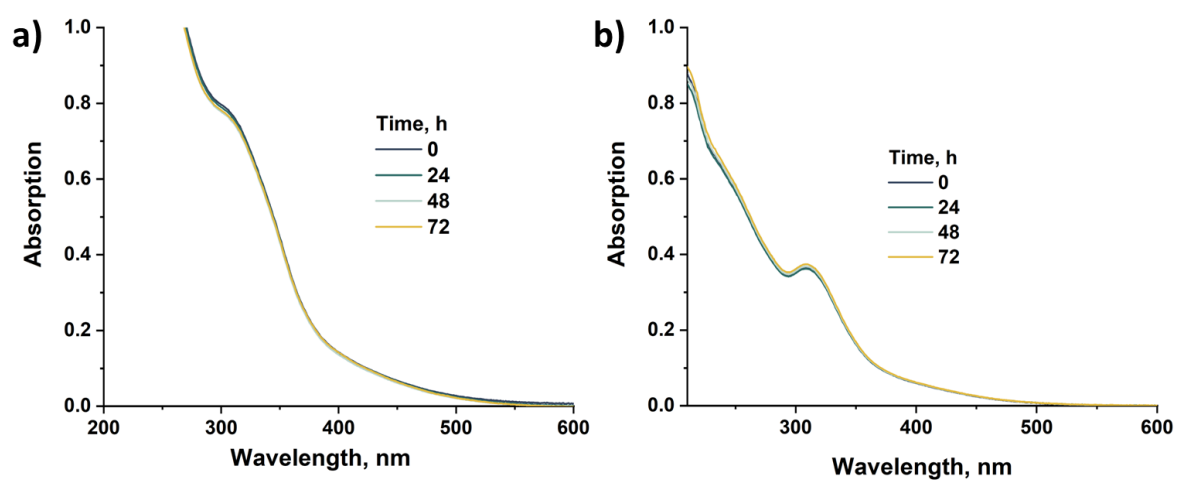

**Figure S16.** UV-vis spectra of compounds **1** (a) and **2** (b) in culture medium in time.

## ICP-AES data

**Table S2.** Quantities of Mo accumulated by cells (Hep-2 and MRC-5) after incubation in 1 mM ( $\sim 2350 \mu\text{g Mo} / 5 \cdot 10^5 \text{ cells}$ ) of solutions of **1** and **2** for 30 minutes, 2, 6, 24 and 48 h.

| Sample type | Time       | Hep-2, $\mu\text{g Mo}/5 \cdot 10^5 \text{ cells}$ | MRC-5, $\mu\text{g Mo}/5 \cdot 10^5 \text{ cells}$ |
|-------------|------------|----------------------------------------------------|----------------------------------------------------|
| Control     |            | 0.02                                               | 0.01                                               |
| <b>1</b>    | 30 minutes | 0.25                                               | 0.22                                               |
|             | 2 hours    | 0.46                                               | 0.25                                               |
|             | 6 hours    | 0.47                                               | 0.24                                               |
|             | 24 hours   | 0.75                                               | 0.77                                               |
|             | 48 hours   | 0.75                                               | 0.83                                               |
| <b>2</b>    | 30 minutes | 0.18                                               | 0.23                                               |
|             | 2 hours    | 0.32                                               | 0.11                                               |
|             | 6 hours    | 0.33                                               | 0.12                                               |
|             | 24 hours   | 0.43                                               | 0.34                                               |
|             | 48 hours   | 0.42                                               | 0.34                                               |

## IR spectra

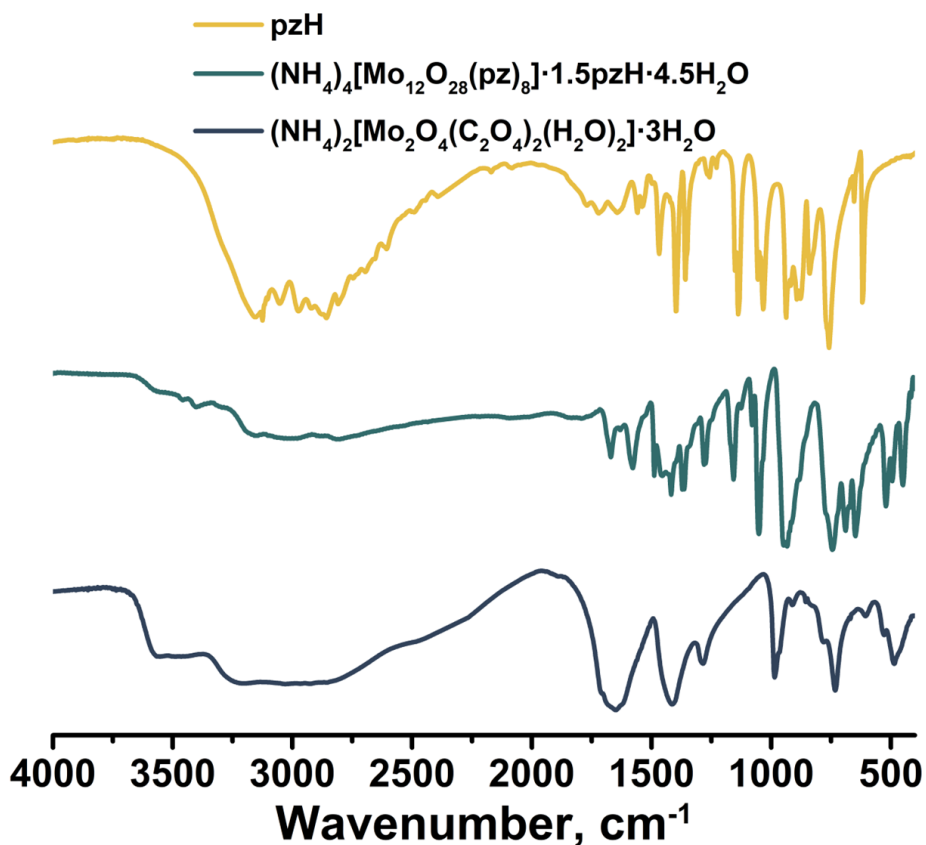

Figure S17. FTIR spectra of **1** in comparison with pyrazole and initial cluster.

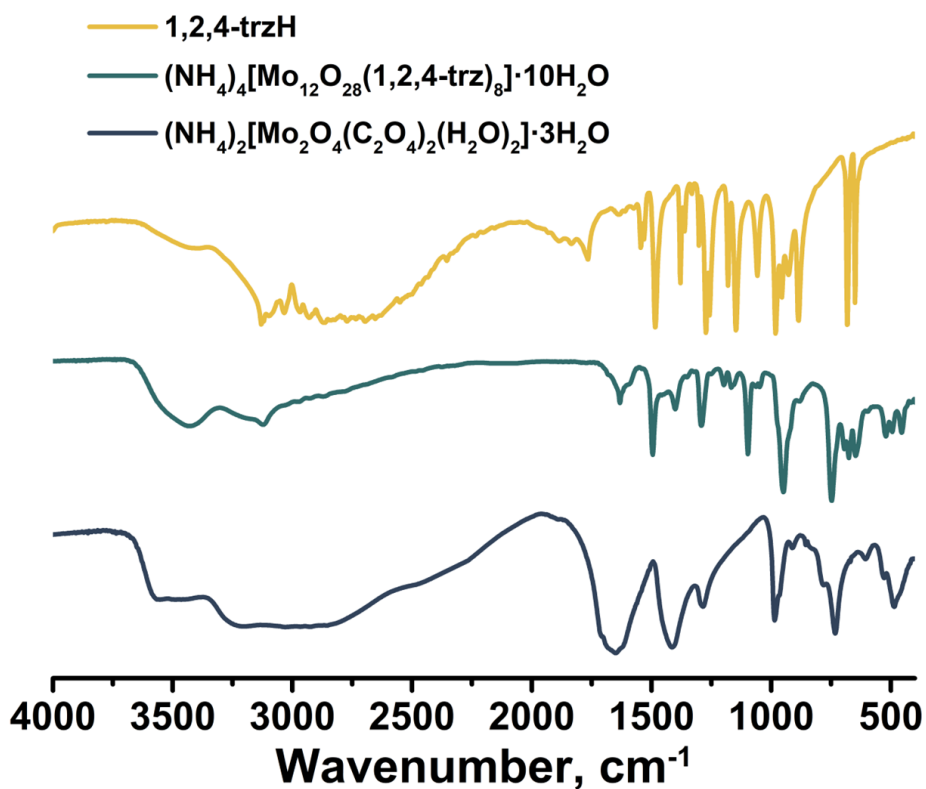

Figure S18. FTIR spectra of **2** in comparison with pyrazole and initial cluster.

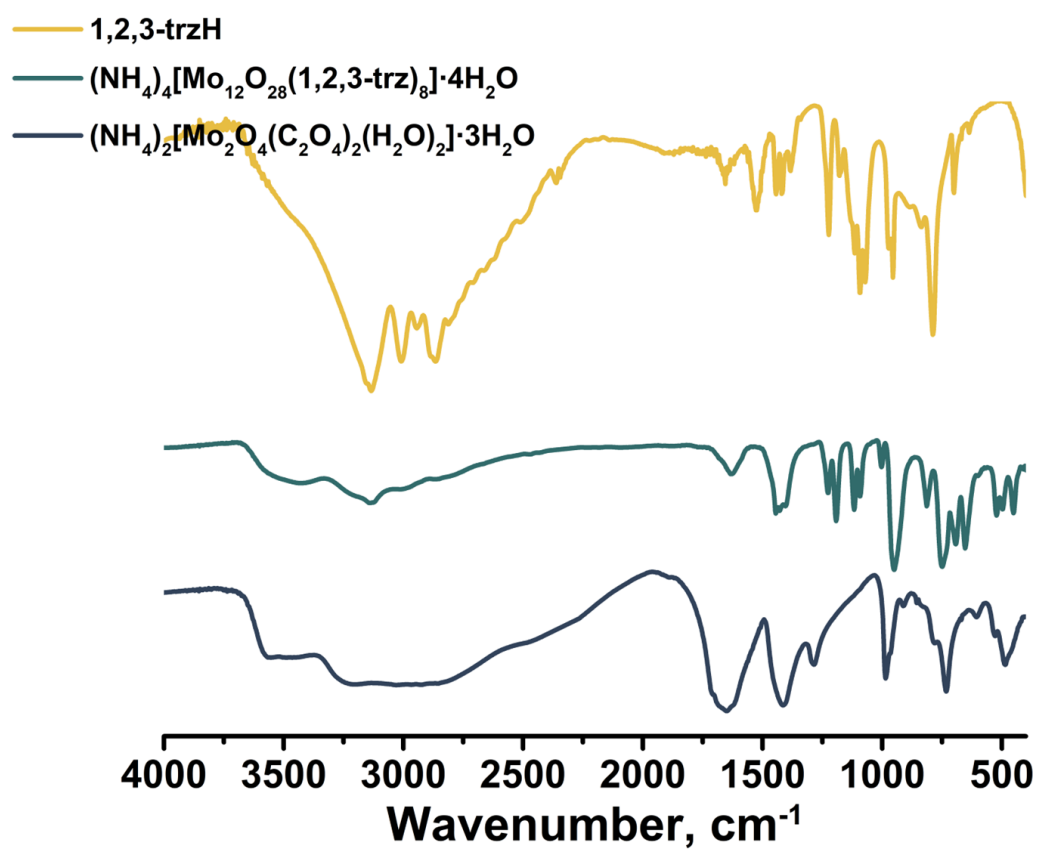

**Figure S19.** FTIR spectra of **3** in comparison with pyrazole and initial cluster.

## Thermogravimetric analysis

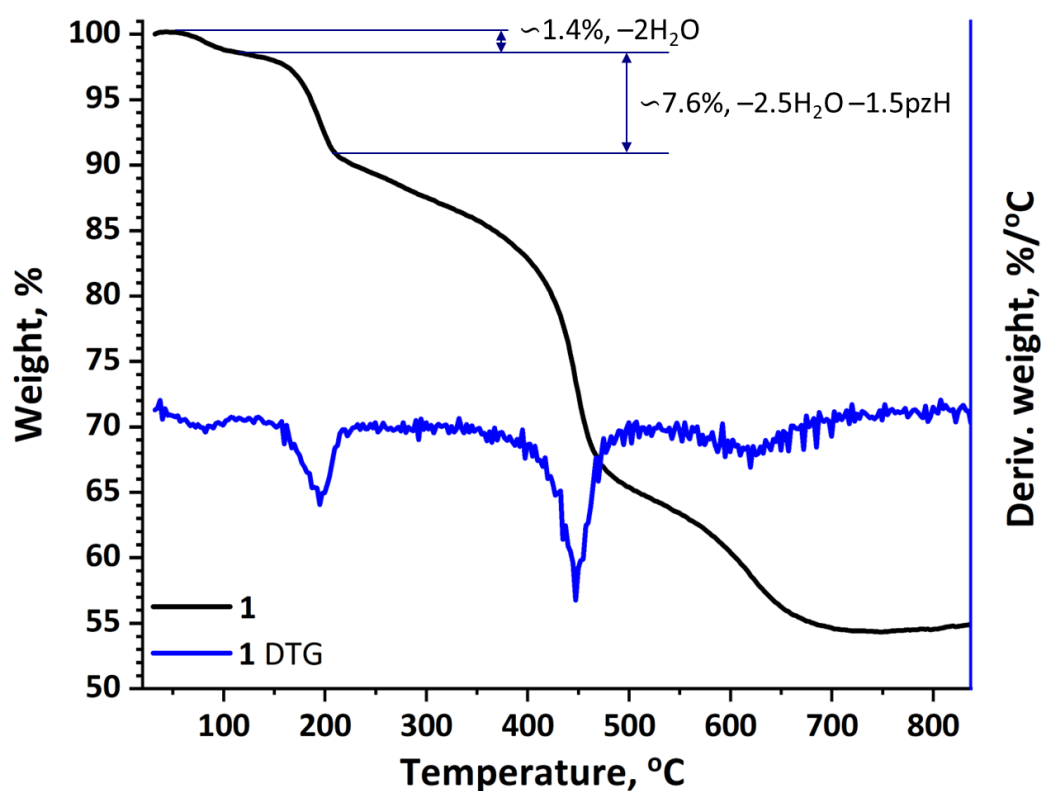

Figure S20. TGA and DTG curves of **1**. Heating rates of 10 °C·min<sup>-1</sup>.

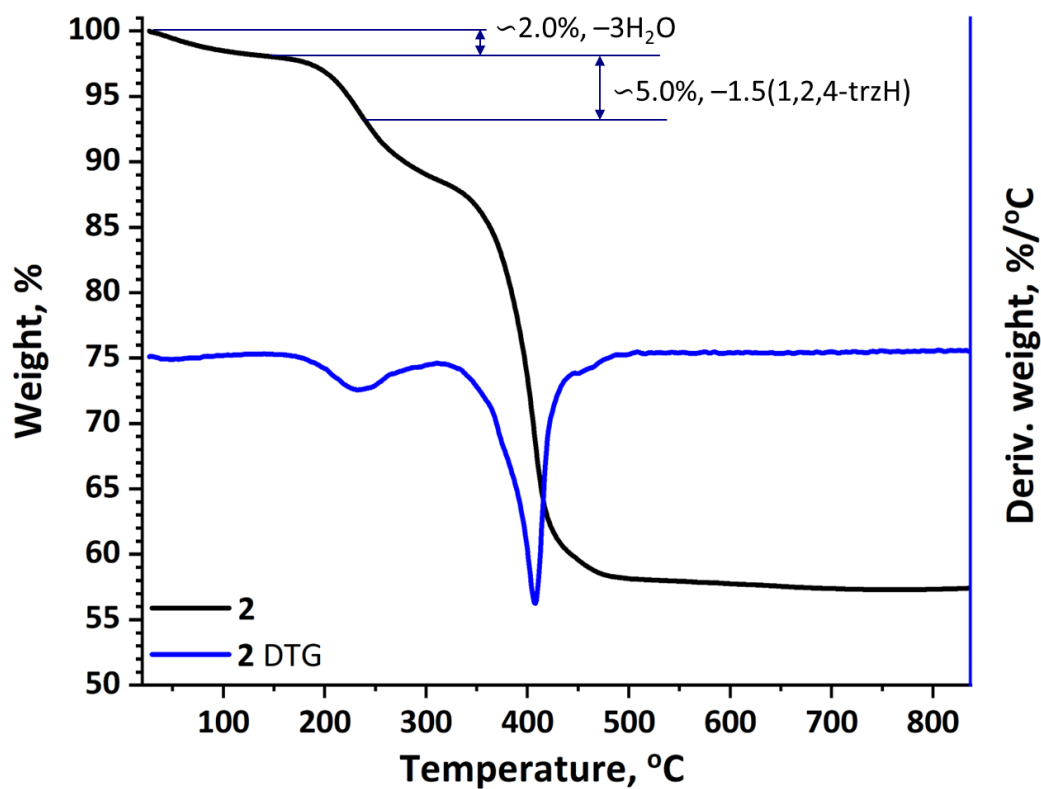

Figure S21. TGA and DTG curves of **2**. Heating rates of 10 °C·min<sup>-1</sup>.

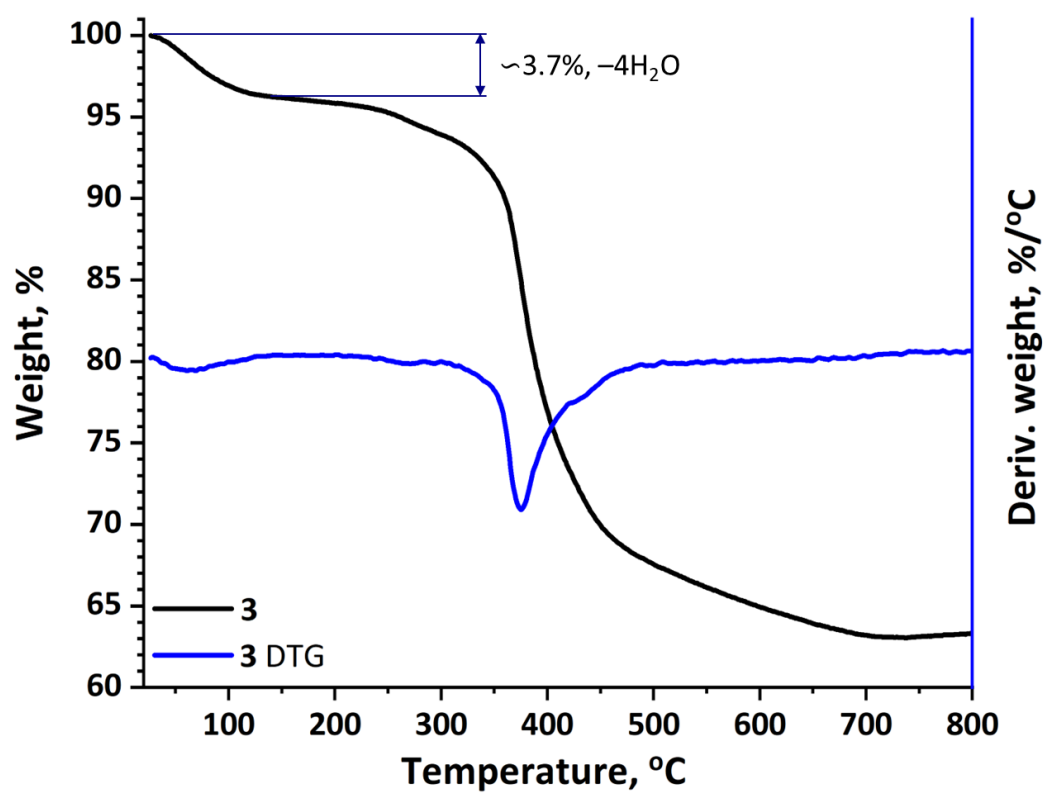

**Figure S22.** TGA and DTG curves of **3**. Heating rates of 10 °C·min<sup>-1</sup>.

## Powder X-ray diffraction analysis

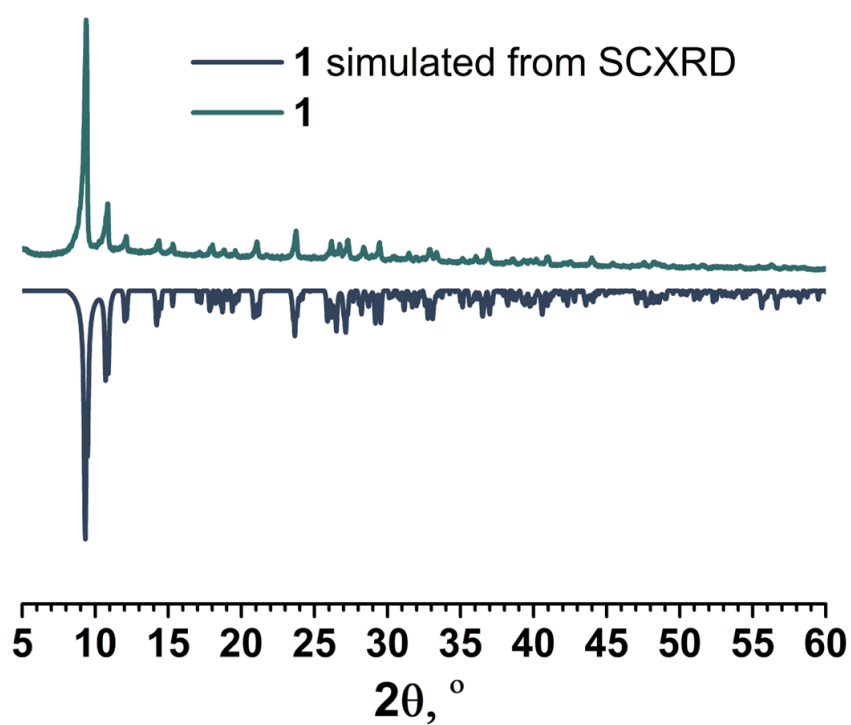

**Figure S23.** XRPD pattern of **1** in comparison with calculated one from the SCXRD data.

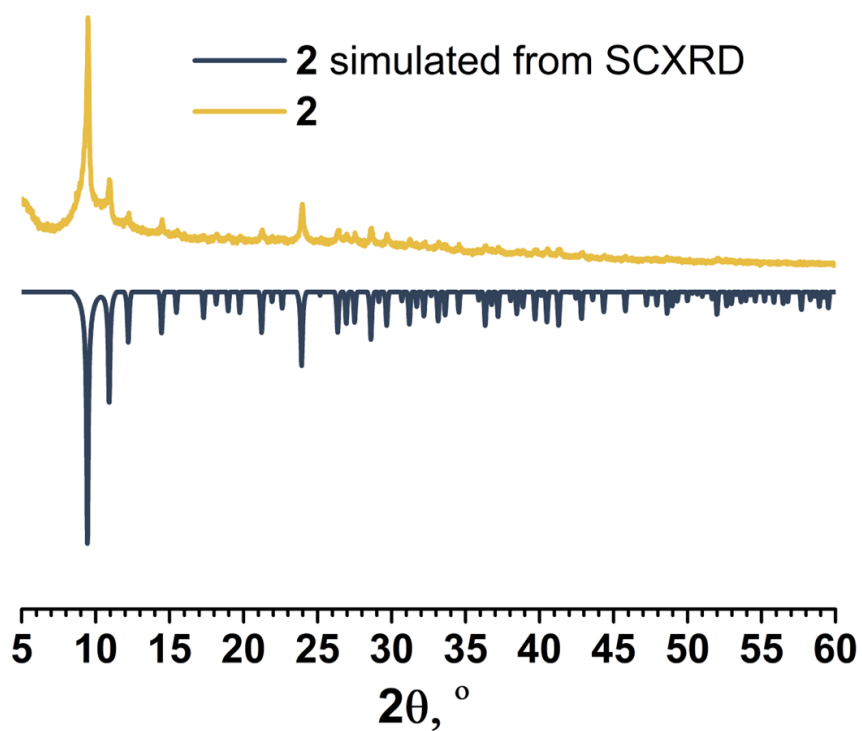

**Figure S24.** XRPD pattern of **2** in comparison with calculated one from the SCXRD data.

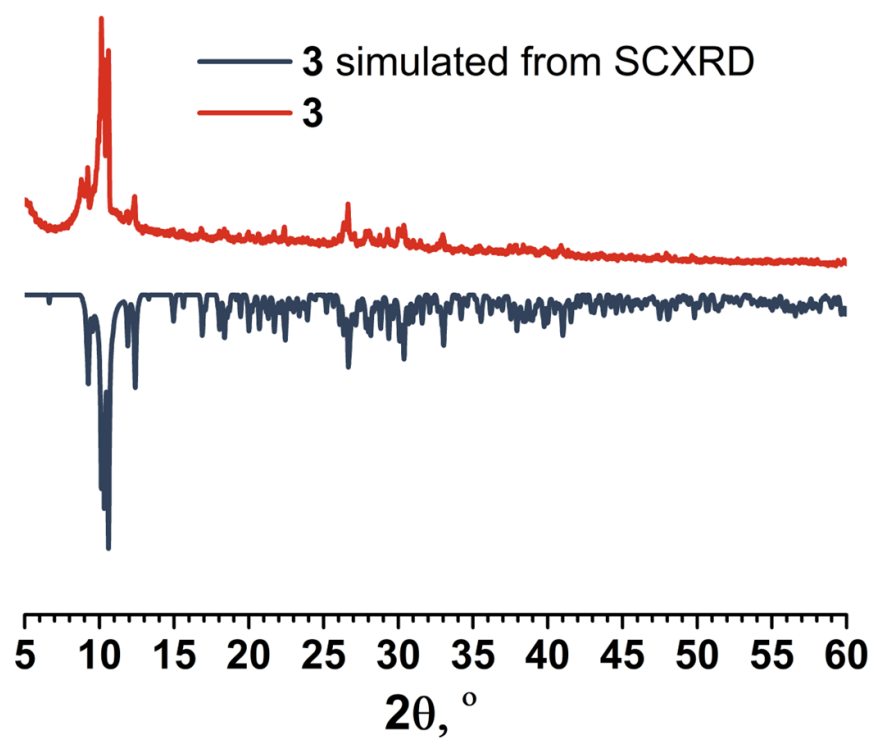

**Figure S25.** XRPD pattern of **3** in comparison with calculated one from the SCXRD data.



## Crystal structure data

**Table S3.** Selected crystallographic parameters of the single-crystal X-ray diffraction structural analysis for  $(\text{NH}_4)_4[\text{Mo}_{12}\text{O}_{28}(\text{pz})_8] \cdot 1.5\text{pzH} \cdot 4.5\text{H}_2\text{O}$  (**1**),  $(\text{NH}_4)_4[\text{Mo}_{12}\text{O}_{28}(1,2,4\text{-trz})_8] \cdot 10\text{H}_2\text{O}$  (**2**) and  $(\text{NH}_4)_4[\text{Mo}_{12}\text{O}_{28}(1,2,3\text{-trz})_8] \cdot 4\text{H}_2\text{O}$  (**3**).

| Compound                                                               | <b>1</b>                                                                 | <b>2</b>                                                             | <b>3</b>                                                             |
|------------------------------------------------------------------------|--------------------------------------------------------------------------|----------------------------------------------------------------------|----------------------------------------------------------------------|
| CCDC                                                                   | 2299185                                                                  | 2299187                                                              | 2299186                                                              |
| Empirical formula                                                      | $\text{C}_{28.5}\text{H}_{55}\text{Mo}_{12}\text{N}_{23}\text{O}_{32.5}$ | $\text{C}_{16}\text{H}_{52}\text{Mo}_{12}\text{N}_{28}\text{O}_{38}$ | $\text{C}_{16}\text{H}_{40}\text{Mo}_{12}\text{N}_{28}\text{O}_{32}$ |
| Formula weight                                                         | 2391.23                                                                  | 2396.13                                                              | 2288.04                                                              |
| Temperature, K                                                         | 150(2)                                                                   | 150(2)                                                               | 150(2)                                                               |
| Crystal system                                                         | Trigonal                                                                 | Cubic                                                                | Monoclinic                                                           |
| Space group                                                            | $R\bar{3}c$                                                              | $I\bar{4}3d$                                                         | $P2_1/n$                                                             |
| $a$ , Å                                                                | 38.3453(15)                                                              | 26.6106(4)                                                           | 11.7496(4)                                                           |
| $b$ , Å                                                                | 38.3453(15)                                                              | 26.6106(4)                                                           | 21.5118(7)                                                           |
| $c$ , Å                                                                | 22.8946(11)                                                              | 26.6106(4)                                                           | 22.6938(7)                                                           |
| $\alpha$ , °                                                           | 90                                                                       | 90                                                                   | 90                                                                   |
| $\beta$ , °                                                            | 90                                                                       | 90                                                                   | 102.1740(10)                                                         |
| $\gamma$ , °                                                           | 120                                                                      | 90                                                                   | 90                                                                   |
| $V$ , Å <sup>3</sup>                                                   | 29153(3)                                                                 | 18843.6(8)                                                           | 5607.0(3)                                                            |
| $Z$                                                                    | 18                                                                       | 12                                                                   | 4                                                                    |
| $\rho_{\text{calc}}$ , g/cm <sup>3</sup>                               | 2.452                                                                    | 2.534                                                                | 2.710                                                                |
| $\mu$ , mm <sup>-1</sup>                                               | 2.338                                                                    | 2.420                                                                | 2.696                                                                |
| $F(000)$                                                               | 20718                                                                    | 13824                                                                | 4368                                                                 |
| Crystal size                                                           | 0.12 × 0.10 × 0.10                                                       | 0.06 × 0.06 × 0.06                                                   | 0.10 × 0.08 × 0.08                                                   |
| 2 $\theta$ range for data collection, °                                | 1.850 to 33.172                                                          | 2.165 to 30.495                                                      | 1.893 to 33.158                                                      |
| Index ranges                                                           | $-58 \leq h \leq 58$                                                     | $-37 \leq h \leq 37$                                                 | $-18 \leq h \leq 18$                                                 |
|                                                                        | $-58 \leq k \leq 45$                                                     | $-38 \leq k \leq 37$                                                 | $-33 \leq k \leq 33$                                                 |
|                                                                        | $-35 \leq l \leq 35$                                                     | $-38 \leq l \leq 38$                                                 | $-28 \leq l \leq 34$                                                 |
| Reflections collected                                                  | 184771                                                                   | 180189                                                               | 74359                                                                |
| Independent reflections                                                | 24695 [ $R_{\text{int}} = 0.0853$ ]                                      | 4789 [ $R_{\text{int}} = 0.0811$ ]                                   | 21345 [ $R_{\text{int}} = 0.0520$ ]                                  |
| Data/restraints/parameters                                             | 24695/19/918                                                             | 4789/24/254                                                          | 21345/30/832                                                         |
| Goodness-of-fit on $F^2$                                               | 1.069                                                                    | 1.131                                                                | 1.063                                                                |
| $R_1 / wR_2(I > 2\sigma(I))$                                           | 0.0514/0.1212                                                            | 0.0243/0.0549                                                        | 0.0385/0.0850                                                        |
| $R_1 / wR_1$ (all data)                                                | 0.0580/0.1249                                                            | 0.0275/0.0565                                                        | 0.0606/0.0914                                                        |
| $\Delta\rho_{\text{max}}/\Delta\rho_{\text{min}}$ (e·Å <sup>-3</sup> ) | 2.197/−2.089                                                             | 0.640/−0.506                                                         | 1.260/−1.537                                                         |

## References

1. M. K. Ehlert, S. J. Rettig, A. Storr, R. C. Thompson and J. Trotter, *Inorg. Chem.*, 1993, **32**, 5176–5182.
2. B. Modec, J. V. Brenčič, L. Golič and L. M. Daniels, *Polyhedron*, 2000, **19**, 1407-1414.
