# Supplementary material for: Water-Soluble Polyoxometal Clusters of Molybdenum (V) with Pyrazole and Triazole: Synthesis and Study of Cytotoxicity and Antiviral Activity
Source: Molecules. 2023 Dec 14;28(24):8079. doi: 10.3390/molecules28248079 (PMC10745505; doi:10.3390/molecules28248079)
Supplement: Supplementary file 1 [file molecules-28-08079-s001.zip]

Archive with 7 entries (7 files):
- Compound 1 checkcif.pdf
- Compound 1.cif
- Compound 2 checkcif.pdf
- Compound 2.cif
- Compound 3 checkcif.pdf
- Compound 3.cif
- ESI revised.pdf
