# Supplementary material for: Water-Soluble Polyoxometal Clusters of Molybdenum (V) with Pyrazole and Triazole: Synthesis and Study of Cytotoxicity and Antiviral Activity
Source: Molecules. 2023 Dec 14;28(24):8079. doi: 10.3390/molecules28248079 (PMC10745505; doi:10.3390/molecules28248079)
Supplement: Supplementary file 1 [file molecules-28-08079-s001.zip › Compound 1.cif]

data_jul167-1

_publ_requested_journal          'Dalton Trans.'
_publ_contact_author_name        'Dr. Natalia V. Kuratieva'
_publ_contact_author_address     
;Nikolaev Institute of Inorganic Chemistry,
SB Russian Academy of Sciences,
Akad. Lavrentiev prospekt 3,
Novosibirsk,
630090 Russia
;


_publ_contact_author_email       kuratieva@gmail.com
_publ_contact_author_phone       7(383)3309466
_publ_contact_author_fax         7(383)3309489
loop_
_publ_author_name
_publ_author_address
'Konkova, Anna V.'
;Nikolaev Institute of Inorganic Chemistry,
SB Russian Academy of Sciences,
Akad. Lavrentiev prospekt 3,
Novosibirsk,
630090 Russia
;
'Savina, Iulia V.'
;Nikolaev Institute of Inorganic Chemistry,
SB Russian Academy of Sciences,
Akad. Lavrentiev prospekt 3,
Novosibirsk,
630090 Russia
;
'Evtushok, Darya V.'
;Nikolaev Institute of Inorganic Chemistry,
SB Russian Academy of Sciences,
Akad. Lavrentiev prospekt 3,
Novosibirsk,
630090 Russia
;
'Pozmogova, Tatiana N.'
;Nikolaev Institute of Inorganic Chemistry,
SB Russian Academy of Sciences,
Akad. Lavrentiev prospekt 3,
Novosibirsk,
630090 Russia
;
'Solomatina, Maria V.'
;Research Institute of Virology, 
Federal Research Center of Fundamental and Translational Medicine, 
2 Timakova St, Novosibirsk 
630117 Russia
;
'Nohova, Alina R.'
;Research Institute of Virology, 
Federal Research Center of Fundamental and Translational Medicine, 
2 Timakova St, Novosibirsk 
630117 Russia
;
'Alekseev, Alexander Y.'
;Research Institute of Virology, 
Federal Research Center of Fundamental and Translational Medicine, 
2 Timakova St, Novosibirsk 
630117 Russia
;
'Kuratieva, Natalia V.'
;Nikolaev Institute of Inorganic Chemistry,
SB Russian Academy of Sciences,
Akad. Lavrentiev prospekt 3,
Novosibirsk,
630090 Russia
;
'Eltsov, Ilia V.'
;Novosibirsk State University, 
2 Pirogov Str., 
Novosibirsk, 
630090 Russia
;
'Yanshole, Vadim V.'
;International Tomography Center SB RAS, 
3a Institutskaya Str., 
Novosibirsk, 
630090 Russia
;
'Shestopalov, Alexander M.'
;Research Institute of Virology, 
Federal Research Center of Fundamental and Translational Medicine, 
2 Timakova St, Novosibirsk 
630117 Russia
;
'Ivanov, Anton A.'
;Nikolaev Institute of Inorganic Chemistry,
SB Russian Academy of Sciences,
Akad. Lavrentiev prospekt 3,
Novosibirsk,
630090 Russia
;
'Shestopalov, Michael A.'
;Nikolaev Institute of Inorganic Chemistry,
SB Russian Academy of Sciences,
Akad. Lavrentiev prospekt 3,
Novosibirsk,
630090 Russia
;


_audit_creation_method           SHELXL-2014/7
_shelx_SHELXL_version_number     2014/7
_chemical_name_systematic        ?
_chemical_name_common            ?
_chemical_formula_moiety         
'C24 H24 Mo12 N16 O28, 1.5(C3 H4 N2), 4.5(H2 O), 4(N H4)'
_chemical_formula_sum            'C28.50 H55 Mo12 N23 O32.50'
_chemical_melting_point          ?

_exptl_crystal_description       prism
_exptl_crystal_colour            red
_diffrn_ambient_temperature      150(2)
_chemical_formula_weight         2391.23

loop_
_atom_type_symbol
_atom_type_description
_atom_type_scat_dispersion_real
_atom_type_scat_dispersion_imag
_atom_type_scat_source
C C 0.0033 0.0016 'International Tables Vol C Tables 4.2.6.8 and 6.1.1.4'
Mo Mo -1.6832 0.6857 'International Tables Vol C Tables 4.2.6.8 and 6.1.1.4'
N N 0.0061 0.0033 'International Tables Vol C Tables 4.2.6.8 and 6.1.1.4'
O O 0.0106 0.0060 'International Tables Vol C Tables 4.2.6.8 and 6.1.1.4'
H H 0.0000 0.0000 'International Tables Vol C Tables 4.2.6.8 and 6.1.1.4'

_space_group_crystal_system      trigonal
_space_group_IT_number           161
_space_group_name_H-M_alt        'R 3 c :H'
_space_group_name_Hall           'R 3 -2"c'

_shelx_space_group_comment       
;
The symmetry employed for this shelxl refinement is uniquely defined
by the following loop, which should always be used as a source of
symmetry information in preference to the above space-group names.
They are only intended as comments.
;

loop_
_space_group_symop_operation_xyz
'x, y, z'
'-y, x-y, z'
'-x+y, -x, z'
'-x+y, y, z+1/2'
'x, x-y, z+1/2'
'-y, -x, z+1/2'
'x+2/3, y+1/3, z+1/3'
'-y+2/3, x-y+1/3, z+1/3'
'-x+y+2/3, -x+1/3, z+1/3'
'-x+y+2/3, y+1/3, z+5/6'
'x+2/3, x-y+1/3, z+5/6'
'-y+2/3, -x+1/3, z+5/6'
'x+1/3, y+2/3, z+2/3'
'-y+1/3, x-y+2/3, z+2/3'
'-x+y+1/3, -x+2/3, z+2/3'
'-x+y+1/3, y+2/3, z+7/6'
'x+1/3, x-y+2/3, z+7/6'
'-y+1/3, -x+2/3, z+7/6'

_cell_length_a                   38.3453(15)
_cell_length_b                   38.3453(15)
_cell_length_c                   22.8946(11)
_cell_angle_alpha                90
_cell_angle_beta                 90
_cell_angle_gamma                120
_cell_volume                     29153(3)
_cell_formula_units_Z            18
_cell_measurement_temperature    150(2)
_cell_measurement_reflns_used    9392
_cell_measurement_theta_min      2.41
_cell_measurement_theta_max      32.83
_exptl_crystal_density_meas      ?
_exptl_crystal_density_method    ?
_exptl_crystal_density_diffrn    2.452
_exptl_crystal_F_000             20718
_exptl_transmission_factor_min   0.606
_exptl_transmission_factor_max   0.747
_exptl_crystal_size_max          0.12
_exptl_crystal_size_mid          0.10
_exptl_crystal_size_min          0.10
_exptl_absorpt_coefficient_mu    2.338
_shelx_estimated_absorpt_T_min   0.776
_shelx_estimated_absorpt_T_max   0.831

_exptl_absorpt_correction_type   multi-scan
_exptl_absorpt_correction_T_min  ?
_exptl_absorpt_correction_T_max  ?
_exptl_absorpt_process_details   'Bruker SADABS-2012/1'
_exptl_absorpt_special_details   ?


_diffrn_radiation_probe          x-ray
_diffrn_radiation_type           MoK\a
_diffrn_radiation_wavelength     0.71073
_diffrn_source                   ?
_diffrn_source_type              'Incoatec ImS 3.0'
_diffrn_measurement_device_type  'Bruker D8 VENTURE'
_diffrn_measurement_method       '\f and \w scans'
_diffrn_detector_area_resol_mean 7.4
_diffrn_reflns_number            184771
_diffrn_reflns_av_unetI/netI     0.0528
_diffrn_reflns_av_R_equivalents  0.0853
_diffrn_reflns_limit_h_min       -58
_diffrn_reflns_limit_h_max       58
_diffrn_reflns_limit_k_min       -58
_diffrn_reflns_limit_k_max       45
_diffrn_reflns_limit_l_min       -35
_diffrn_reflns_limit_l_max       35
_diffrn_reflns_theta_min         1.850
_diffrn_reflns_theta_max         33.172
_diffrn_reflns_theta_full        25.250
_diffrn_measured_fraction_theta_max 0.999
_diffrn_measured_fraction_theta_full 0.999
_diffrn_reflns_Laue_measured_fraction_max 0.999
_diffrn_reflns_Laue_measured_fraction_full 0.999
_diffrn_reflns_point_group_measured_fraction_max 0.999
_diffrn_reflns_point_group_measured_fraction_full 0.999
_reflns_number_total             24695
_reflns_number_gt                22592
_reflns_threshold_expression     >2\s(I)
_reflns_Friedel_coverage         0.998
_reflns_Friedel_fraction_max     0.999
_reflns_Friedel_fraction_full    0.999

_reflns_special_details          
;
 Reflections were merged by SHELXL according to the crystal
 class for the calculation of statistics and refinement.
 
 _reflns_Friedel_fraction is defined as the number of unique
 Friedel pairs measured divided by the number that would be
 possible theoretically, ignoring centric projections and
 systematic absences.
;


_computing_data_collection       'Bruker APEX3 V2018.7-2'
_computing_cell_refinement       'SAINT V8.38A'
_computing_data_reduction        'SAINT V8.38A'
_computing_structure_solution    'Bruker SHELXTL'
_computing_structure_refinement  'Bruker SHELXTL'
_computing_molecular_graphics    'Bruker SHELXTL'
_computing_publication_material  'Bruker SHELXTL'
_refine_special_details          
;
 Refined as a 2-component inversion twin.
;
_refine_ls_structure_factor_coef Fsqd
_refine_ls_matrix_type           full
_refine_ls_weighting_scheme      calc
_refine_ls_weighting_details     
'w=1/[\s^2^(Fo^2^)+(0.0495P)^2^+637.5670P] where P=(Fo^2^+2Fc^2^)/3'
_atom_sites_solution_primary     ?
_atom_sites_solution_secondary   ?
_atom_sites_solution_hydrogens   geom
_refine_ls_hydrogen_treatment    constr
_refine_ls_extinction_method     none
_refine_ls_extinction_coef       .
_refine_ls_abs_structure_details 
;
 Refined as an inversion twin.
;
_refine_ls_abs_structure_Flack   0.01(6)
_symmetry_cell_setting           ?
_symmetry_space_group_name_h-m   ?
_symmetry_int_tables_number      ?
_chemical_absolute_configuration ?
_refine_ls_number_reflns         24695
_refine_ls_number_parameters     918
_refine_ls_number_restraints     19
_refine_ls_R_factor_all          0.0580
_refine_ls_R_factor_gt           0.0514
_refine_ls_wR_factor_ref         0.1249
_refine_ls_wR_factor_gt          0.1212
_refine_ls_goodness_of_fit_ref   1.069
_refine_ls_restrained_S_all      1.070
_refine_ls_shift/su_max          0.000
_refine_ls_shift/su_mean         0.000

loop_
_atom_site_label
_atom_site_type_symbol
_atom_site_fract_x
_atom_site_fract_y
_atom_site_fract_z
_atom_site_U_iso_or_equiv
_atom_site_adp_type
_atom_site_occupancy
_atom_site_site_symmetry_order
_atom_site_calc_flag
_atom_site_refinement_flags_posn
_atom_site_refinement_flags_adp
_atom_site_refinement_flags_occupancy
_atom_site_disorder_assembly
_atom_site_disorder_group
Mo1 Mo 0.14751(2) 0.06252(2) 0.28276(3) 0.01624(14) Uani 1 1 d . . . . .
Mo2 Mo 0.16479(2) 0.11715(2) 0.36324(4) 0.01624(14) Uani 1 1 d . . . . .
Mo3 Mo 0.11128(2) 0.00392(2) 0.39687(3) 0.01528(14) Uani 1 1 d . . . . .
Mo4 Mo 0.25182(2) 0.12135(2) 0.35346(3) 0.01481(13) Uani 1 1 d . . . . .
Mo5 Mo 0.19366(2) 0.00122(2) 0.31852(3) 0.01497(13) Uani 1 1 d . . . . .
Mo6 Mo 0.20111(2) 0.09009(2) 0.49512(3) 0.01414(13) Uani 1 1 d . . . . .
Mo7 Mo 0.14010(2) -0.02624(2) 0.47034(3) 0.01479(13) Uani 1 1 d . . . . .
Mo8 Mo 0.28439(2) 0.08469(2) 0.40466(3) 0.01506(13) Uani 1 1 d . . . . .
Mo9 Mo 0.23200(3) -0.02495(2) 0.38027(3) 0.01609(14) Uani 1 1 d . . . . .
Mo10 Mo 0.22409(2) 0.05009(2) 0.55946(3) 0.01515(13) Uani 1 1 d . . . . .
Mo11 Mo 0.21825(3) -0.03722(3) 0.54694(3) 0.01718(14) Uani 1 1 d . . . . .
Mo12 Mo 0.28831(3) 0.00772(3) 0.49675(4) 0.01792(15) Uani 1 1 d . . . . .
O1 O 0.1299(2) 0.0790(2) 0.2273(3) 0.0233(14) Uani 1 1 d . . . . .
O1W O 0.1337(6) 0.2576(5) 0.3034(8) 0.061(4) Uani 0.75 1 d . . P . .
O2 O 0.1420(2) 0.1423(2) 0.3365(3) 0.0215(14) Uani 1 1 d . . . . .
O2WA O 0.1273(7) 0.3698(7) 0.3816(10) 0.037(3) Uani 0.442(17) 1 d . . P . .
O2WB O 0.1543(5) 0.3506(5) 0.3527(8) 0.037(3) Uani 0.558(17) 1 d . . P . .
O3 O 0.0702(2) -0.0009(2) 0.4331(3) 0.0220(14) Uani 1 1 d . . . . .
O3WA O 0.1991(4) 0.3268(5) 0.2755(8) 0.030(3) Uani 0.5 1 d . . P A 1
O3WB O 0.2282(6) 0.3228(6) 0.3558(9) 0.044(5) Uani 0.5 1 d . . P B 3
O3WC O 0.2277(11) 0.3327(9) 0.3071(15) 0.028(5) Uani 0.25 1 d . U P C 2
O3WD O 0.1928(11) 0.3047(9) 0.3175(15) 0.028(5) Uani 0.25 1 d . . P D 4
O4 O 0.2806(2) 0.1395(2) 0.2919(3) 0.0224(14) Uani 1 1 d . . . . .
O4WA O 0.0460(8) 0.0457(9) 0.0574(12) 0.060(7) Uani 0.5 1 d . . P E 3
O4WB O 0.0348(18) 0.032(2) 0.095(2) 0.068(11) Uani 0.25 1 d . . P F 2
O4WC O 0.0000 0.0000 0.0853(19) 0.068(11) Uani 0.5 3 d S T P G 1
O5 O 0.1622(2) -0.0420(2) 0.2834(3) 0.0222(14) Uani 1 1 d . . . . .
O5WA O 0.0000 0.0000 0.3905(15) 0.053(7) Uani 0.66(4) 3 d S T P . .
O5WB O 0.0000 0.0000 0.465(3) 0.053(7) Uani 0.34(4) 3 d S T P . .
O6 O 0.2311(2) 0.1363(2) 0.5243(3) 0.0216(14) Uani 1 1 d . . . . .
O7 O 0.1054(2) -0.0391(2) 0.5237(3) 0.0205(13) Uani 1 1 d . . . . .
O8 O 0.3212(2) 0.0955(2) 0.3555(3) 0.0236(15) Uani 1 1 d . . . . .
O9 O 0.2086(3) -0.0745(2) 0.3612(3) 0.0257(15) Uani 1 1 d . . . . .
O10 O 0.2593(2) 0.0869(2) 0.6030(3) 0.0226(14) Uani 1 1 d . . . . .
O11 O 0.2277(3) -0.0681(3) 0.5892(3) 0.0248(15) Uani 1 1 d . . . . .
O12 O 0.3192(2) -0.0029(2) 0.5375(3) 0.0232(14) Uani 1 1 d . . . . .
O13 O 0.1215(2) 0.0604(2) 0.3589(3) 0.0173(12) Uani 1 1 d . . . . .
O14 O 0.1988(2) 0.1105(2) 0.3036(3) 0.0166(12) Uani 1 1 d . . . . .
O15 O 0.15514(19) 0.0219(2) 0.3307(3) 0.0149(11) Uani 1 1 d . . . . .
O16 O 0.2033(2) 0.1064(2) 0.4110(3) 0.0167(12) Uani 1 1 d . . . . .
O17 O 0.1553(2) 0.0300(2) 0.4531(3) 0.0160(12) Uani 1 1 d . . . . .
O18 O 0.2356(2) 0.0640(2) 0.3562(3) 0.0154(11) Uani 1 1 d . . . . .
O19 O 0.1877(2) -0.0152(2) 0.4014(3) 0.0157(12) Uani 1 1 d . . . . .
O20 O 0.2395(2) 0.0712(2) 0.4796(3) 0.0153(12) Uani 1 1 d . . . . .
O21 O 0.1890(2) -0.0076(2) 0.5206(3) 0.0162(12) Uani 1 1 d . . . . .
O22 O 0.2703(2) 0.0282(2) 0.4268(3) 0.0177(12) Uani 1 1 d . . . . .
O23 O 0.2387(2) -0.0408(2) 0.4697(3) 0.0186(13) Uani 1 1 d . . . . .
O24 O 0.2593(2) 0.0206(2) 0.5568(3) 0.0189(13) Uani 1 1 d . . . . .
O25 O 0.1061(2) -0.0486(2) 0.4002(3) 0.0169(12) Uani 1 1 d . . . . .
O26 O 0.2899(2) 0.1383(2) 0.4166(3) 0.0184(12) Uani 1 1 d . . . . .
O27 O 0.1779(2) 0.0568(2) 0.5651(3) 0.0189(13) Uani 1 1 d . . . . .
O28 O 0.2461(2) 0.0045(2) 0.3080(3) 0.0179(12) Uani 1 1 d . . . . .
N1N N 0.3093(3) 0.2037(3) 0.4947(5) 0.038(3) Uani 1 1 d . . . . .
N2N N 0.2851(4) 0.3381(5) 0.4368(8) 0.061(4) Uani 1 1 d . . . . .
N3N N 0.0973(5) 0.1778(5) 0.2912(7) 0.060(4) Uani 1 1 d . . . . .
N4N N 0.1052(5) 0.1028(6) 0.1264(6) 0.058(4) Uani 1 1 d . . . . .
N11 N 0.0916(3) 0.0052(2) 0.2683(4) 0.0212(16) Uani 1 1 d . . . . .
N11S N 0.4398(5) 0.0815(5) 0.3615(8) 0.060(4) Uani 1 1 d . . . . .
N12 N 0.0749(3) -0.0171(3) 0.3172(4) 0.0211(16) Uani 1 1 d . . . . .
N12S N 0.4658(5) 0.1186(6) 0.3484(9) 0.074(6) Uani 1 1 d D . . . .
H12S H 0.4908 0.1264 0.3382 0.089 Uiso 1 1 calc R U . . .
N21 N 0.1852(3) 0.0537(3) 0.2220(3) 0.0204(16) Uani 1 1 d . . . . .
N21S N 0.5061(8) 0.2165(7) 0.4977(13) 0.060(8) Uani 0.5 1 d D . P . .
H21S H 0.5253 0.2145 0.5158 0.072 Uiso 0.5 1 calc R U P . .
N22 N 0.2077(2) 0.0369(2) 0.2402(4) 0.0181(14) Uani 1 1 d . . . . .
N22S N 0.5058(7) 0.2514(6) 0.4912(11) 0.039(5) Uani 0.5 1 d D . P . .
N31 N 0.2176(3) 0.1769(3) 0.3721(4) 0.0229(16) Uani 1 1 d . . . . .
N32 N 0.2535(3) 0.1788(3) 0.3652(4) 0.0212(16) Uani 1 1 d . . . . .
N41 N 0.1404(3) 0.1148(3) 0.4484(4) 0.0203(16) Uani 1 1 d . . . . .
N42 N 0.1491(2) 0.0979(3) 0.4951(4) 0.0186(15) Uani 1 1 d . . . . .
N51 N 0.1638(3) -0.0878(3) 0.5140(4) 0.0229(17) Uani 1 1 d . . . . .
N52 N 0.1401(3) -0.0827(2) 0.4747(4) 0.0178(14) Uani 1 1 d . . . . .
N61 N 0.1950(3) -0.0266(3) 0.6287(4) 0.0234(17) Uani 1 1 d . . . . .
N62 N 0.1997(3) 0.0103(3) 0.6352(4) 0.0228(17) Uani 1 1 d . . . . .
N71 N 0.3321(3) 0.0709(3) 0.5023(4) 0.0215(16) Uani 1 1 d . . . . .
N72 N 0.3247(3) 0.0991(3) 0.4771(4) 0.0190(15) Uani 1 1 d . . . . .
N81 N 0.3139(3) -0.0071(3) 0.4229(4) 0.0272(19) Uani 1 1 d . . . . .
N82 N 0.2906(3) -0.0216(3) 0.3751(4) 0.0221(16) Uani 1 1 d . . . . .
C13 C 0.0364(3) -0.0450(3) 0.3053(5) 0.028(2) Uani 1 1 d . . . . .
H13 H 0.0179 -0.0642 0.3322 0.033 Uiso 1 1 calc R U . . .
C13S C 0.4514(7) 0.1436(7) 0.3518(17) 0.107(12) Uani 1 1 d D . . . .
H13S H 0.4654 0.1716 0.3433 0.129 Uiso 1 1 calc R U . . .
C14 C 0.0280(4) -0.0412(4) 0.2473(6) 0.036(3) Uani 1 1 d . . . . .
H14 H 0.0035 -0.0570 0.2269 0.044 Uiso 1 1 calc R U . . .
C14S C 0.4118(8) 0.1204(7) 0.3703(14) 0.092(6) Uani 1 1 d D . . . .
H14S H 0.3930 0.1287 0.3799 0.111 Uiso 1 1 calc R U . . .
C15 C 0.0637(4) -0.0088(4) 0.2255(5) 0.030(2) Uani 1 1 d . . . . .
H15 H 0.0676 0.0017 0.1870 0.036 Uiso 1 1 calc R U . . .
C15S C 0.4067(9) 0.0831(7) 0.3712(14) 0.092(6) Uani 1 1 d D U . . .
H15S H 0.3814 0.0598 0.3782 0.111 Uiso 1 1 calc R U . . .
C23 C 0.2356(4) 0.0443(4) 0.1993(5) 0.031(2) Uani 1 1 d . . . . .
H23 H 0.2549 0.0357 0.2004 0.037 Uiso 1 1 calc R U . . .
C23S C 0.4750(10) 0.2394(11) 0.4538(14) 0.060(10) Uani 0.5 1 d D . P . .
H23S H 0.4678 0.2577 0.4373 0.072 Uiso 0.5 1 calc R U P . .
C24 C 0.2313(4) 0.0670(5) 0.1542(5) 0.038(3) Uani 1 1 d . . . . .
H24 H 0.2469 0.0767 0.1196 0.046 Uiso 1 1 calc R U . . .
C24S C 0.4558(15) 0.2018(14) 0.442(2) 0.10(2) Uani 0.5 1 d D . P . .
H24S H 0.4336 0.1882 0.4158 0.117 Uiso 0.5 1 calc R U P . .
C25 C 0.1998(4) 0.0720(4) 0.1709(5) 0.028(2) Uani 1 1 d . . . . .
H25 H 0.1899 0.0864 0.1493 0.033 Uiso 1 1 calc R U . . .
C25S C 0.4739(9) 0.1856(7) 0.4736(15) 0.053(9) Uani 0.5 1 d D . P . .
H25S H 0.4653 0.1578 0.4778 0.064 Uiso 0.5 1 calc R U P . .
C33 C 0.2822(3) 0.2174(3) 0.3606(5) 0.027(2) Uani 1 1 d . . . . .
H33 H 0.3102 0.2272 0.3557 0.032 Uiso 1 1 calc R U . . .
C34 C 0.2639(4) 0.2407(3) 0.3642(7) 0.035(3) Uani 1 1 d . . . . .
H34 H 0.2767 0.2692 0.3617 0.042 Uiso 1 1 calc R U . . .
C35 C 0.2241(4) 0.2148(3) 0.3720(6) 0.028(2) Uani 1 1 d . . . . .
H35 H 0.2040 0.2221 0.3766 0.033 Uiso 1 1 calc R U . . .
C43 C 0.1235(4) 0.0932(4) 0.5381(6) 0.031(2) Uani 1 1 d . . . . .
H43 H 0.1230 0.0820 0.5753 0.037 Uiso 1 1 calc R U . . .
C44 C 0.0979(4) 0.1066(5) 0.5211(6) 0.039(3) Uani 1 1 d . . . . .
H44 H 0.0773 0.1071 0.5436 0.046 Uiso 1 1 calc R U . . .
C45 C 0.1089(3) 0.1196(4) 0.4630(6) 0.028(2) Uani 1 1 d . . . . .
H45 H 0.0963 0.1299 0.4382 0.033 Uiso 1 1 calc R U . . .
C53 C 0.1185(4) -0.1166(3) 0.4450(6) 0.030(2) Uani 1 1 d . . . . .
H53 H 0.0993 -0.1209 0.4154 0.037 Uiso 1 1 calc R U . . .
C54 C 0.1286(4) -0.1451(4) 0.4647(7) 0.040(3) Uani 1 1 d . . . . .
H54 H 0.1183 -0.1719 0.4509 0.048 Uiso 1 1 calc R U . . .
C55 C 0.1564(4) -0.1264(4) 0.5080(6) 0.030(2) Uani 1 1 d . . . . .
H55 H 0.1687 -0.1382 0.5302 0.036 Uiso 1 1 calc R U . . .
C63 C 0.1943(3) 0.0152(4) 0.6915(4) 0.026(2) Uani 1 1 d . . . . .
H63 H 0.1958 0.0388 0.7075 0.031 Uiso 1 1 calc R U . . .
C64 C 0.1861(4) -0.0185(4) 0.7232(5) 0.030(2) Uani 1 1 d . . . . .
H64 H 0.1809 -0.0229 0.7639 0.036 Uiso 1 1 calc R U . . .
C65 C 0.1872(4) -0.0443(4) 0.6828(5) 0.031(2) Uani 1 1 d . . . . .
H65 H 0.1831 -0.0703 0.6910 0.037 Uiso 1 1 calc R U . . .
C73 C 0.3518(4) 0.1346(4) 0.4976(6) 0.038(3) Uani 1 1 d . . . . .
H73 H 0.3531 0.1594 0.4888 0.046 Uiso 1 1 calc R U . . .
C74 C 0.3785(4) 0.1302(5) 0.5344(7) 0.042(3) Uani 1 1 d . . . . .
H74 H 0.4017 0.1509 0.5533 0.051 Uiso 1 1 calc R U . . .
C75 C 0.3638(4) 0.0896(4) 0.5375(6) 0.034(3) Uani 1 1 d . . . . .
H75 H 0.3745 0.0768 0.5610 0.041 Uiso 1 1 calc R U . . .
C83 C 0.3068(5) -0.0378(5) 0.3392(5) 0.037(3) Uani 1 1 d . . . . .
H83 H 0.2961 -0.0496 0.3023 0.044 Uiso 1 1 calc R U . . .
C84 C 0.3415(5) -0.0343(6) 0.3646(6) 0.050(4) Uani 1 1 d . . . . .
H84 H 0.3586 -0.0435 0.3500 0.061 Uiso 1 1 calc R U . . .
C85 C 0.3448(5) -0.0142(5) 0.4166(5) 0.040(3) Uani 1 1 d . . . . .
H85 H 0.3660 -0.0065 0.4441 0.048 Uiso 1 1 calc R U . . .

loop_
_atom_site_aniso_label
_atom_site_aniso_U_11
_atom_site_aniso_U_22
_atom_site_aniso_U_33
_atom_site_aniso_U_23
_atom_site_aniso_U_13
_atom_site_aniso_U_12
Mo1 0.0160(3) 0.0156(3) 0.0166(3) 0.0004(3) -0.0038(3) 0.0074(3)
Mo2 0.0151(3) 0.0136(3) 0.0204(3) 0.0004(3) -0.0029(3) 0.0074(3)
Mo3 0.0129(3) 0.0136(3) 0.0180(3) -0.0002(2) -0.0016(3) 0.0056(3)
Mo4 0.0134(3) 0.0141(3) 0.0160(3) 0.0015(2) -0.0009(2) 0.0062(3)
Mo5 0.0167(3) 0.0152(3) 0.0135(3) 0.0003(2) 0.0004(2) 0.0084(3)
Mo6 0.0133(3) 0.0153(3) 0.0150(3) -0.0007(2) -0.0004(2) 0.0081(3)
Mo7 0.0152(3) 0.0147(3) 0.0150(3) 0.0011(2) 0.0009(2) 0.0079(3)
Mo8 0.0141(3) 0.0177(3) 0.0151(3) 0.0010(3) -0.0002(2) 0.0092(3)
Mo9 0.0204(4) 0.0173(3) 0.0147(3) 0.0010(3) 0.0028(3) 0.0125(3)
Mo10 0.0168(3) 0.0187(3) 0.0130(3) -0.0004(3) 0.0002(2) 0.0112(3)
Mo11 0.0217(4) 0.0204(4) 0.0149(3) 0.0033(3) 0.0022(3) 0.0146(3)
Mo12 0.0188(3) 0.0248(4) 0.0166(3) 0.0030(3) 0.0017(3) 0.0158(3)
O1 0.020(3) 0.021(3) 0.024(3) 0.003(3) -0.007(3) 0.007(3)
O1W 0.070(12) 0.053(10) 0.069(11) 0.014(8) 0.012(9) 0.037(9)
O2 0.020(3) 0.018(3) 0.029(4) 0.005(3) -0.003(3) 0.012(3)
O2WA 0.033(7) 0.040(7) 0.038(7) 0.001(6) -0.005(5) 0.018(6)
O2WB 0.033(7) 0.040(7) 0.038(7) 0.001(6) -0.005(5) 0.018(6)
O3 0.018(3) 0.022(3) 0.030(4) 0.000(3) -0.003(3) 0.013(3)
O3WA 0.010(6) 0.036(9) 0.042(9) 0.000(7) 0.004(6) 0.010(6)
O3WB 0.029(9) 0.038(10) 0.040(11) 0.006(8) -0.003(8) -0.003(8)
O3WC 0.039(9) 0.019(7) 0.036(9) -0.011(6) 0.004(7) 0.022(7)
O3WD 0.039(9) 0.019(7) 0.036(9) -0.011(6) 0.004(7) 0.022(7)
O4 0.018(3) 0.022(3) 0.023(3) 0.009(3) 0.004(3) 0.007(3)
O4WA 0.048(14) 0.084(19) 0.060(16) 0.027(14) 0.014(12) 0.043(14)
O4WB 0.07(3) 0.11(4) 0.041(17) -0.01(3) -0.03(2) 0.06(3)
O4WC 0.07(3) 0.11(4) 0.041(17) -0.01(3) -0.03(2) 0.06(3)
O5 0.022(3) 0.020(3) 0.021(3) -0.003(3) 0.001(3) 0.008(3)
O5WA 0.054(10) 0.054(10) 0.052(16) 0.000 0.000 0.027(5)
O5WB 0.054(10) 0.054(10) 0.052(16) 0.000 0.000 0.027(5)
O6 0.024(3) 0.019(3) 0.022(3) -0.005(3) -0.005(3) 0.010(3)
O7 0.017(3) 0.023(3) 0.020(3) 0.003(3) 0.008(2) 0.010(3)
O8 0.015(3) 0.029(4) 0.028(4) 0.002(3) 0.005(3) 0.012(3)
O9 0.035(4) 0.018(3) 0.024(3) 0.002(3) 0.004(3) 0.013(3)
O10 0.020(3) 0.026(4) 0.021(3) -0.004(3) -0.005(3) 0.010(3)
O11 0.032(4) 0.031(4) 0.019(3) 0.001(3) 0.001(3) 0.022(3)
O12 0.027(4) 0.029(4) 0.021(3) 0.002(3) -0.001(3) 0.020(3)
O13 0.016(3) 0.014(3) 0.022(3) -0.001(2) -0.005(2) 0.007(2)
O14 0.015(3) 0.015(3) 0.019(3) 0.001(2) -0.004(2) 0.007(2)
O15 0.011(3) 0.015(3) 0.019(3) 0.002(2) 0.001(2) 0.007(2)
O16 0.019(3) 0.016(3) 0.019(3) 0.001(2) 0.000(2) 0.012(3)
O17 0.015(3) 0.013(3) 0.017(3) 0.000(2) -0.001(2) 0.005(2)
O18 0.014(3) 0.014(3) 0.018(3) -0.001(2) -0.002(2) 0.007(2)
O19 0.021(3) 0.014(3) 0.014(3) 0.003(2) 0.003(2) 0.010(2)
O20 0.014(3) 0.019(3) 0.016(3) 0.002(2) 0.002(2) 0.010(2)
O21 0.019(3) 0.016(3) 0.015(3) 0.001(2) -0.001(2) 0.009(3)
O22 0.023(3) 0.021(3) 0.015(3) 0.001(2) 0.003(2) 0.015(3)
O23 0.025(3) 0.019(3) 0.017(3) 0.002(2) 0.004(3) 0.014(3)
O24 0.020(3) 0.025(3) 0.018(3) 0.004(3) 0.003(2) 0.016(3)
O25 0.014(3) 0.014(3) 0.021(3) -0.001(2) -0.001(2) 0.006(2)
O26 0.017(3) 0.016(3) 0.020(3) -0.003(2) -0.004(2) 0.007(3)
O27 0.018(3) 0.023(3) 0.017(3) -0.002(2) 0.003(2) 0.012(3)
O28 0.021(3) 0.019(3) 0.016(3) -0.001(2) 0.002(2) 0.012(3)
N1N 0.031(5) 0.028(5) 0.032(5) -0.001(4) 0.011(4) -0.002(4)
N2N 0.031(6) 0.062(9) 0.083(11) -0.026(8) 0.010(7) 0.018(6)
N3N 0.052(8) 0.078(10) 0.073(10) 0.045(9) 0.031(7) 0.049(8)
N4N 0.055(8) 0.098(13) 0.032(6) 0.030(7) 0.013(6) 0.046(9)
N11 0.023(4) 0.012(3) 0.020(4) 0.001(3) -0.002(3) 0.002(3)
N11S 0.039(7) 0.060(9) 0.065(10) -0.009(8) -0.007(7) 0.014(7)
N12 0.017(4) 0.013(3) 0.026(4) 0.001(3) -0.004(3) 0.002(3)
N12S 0.038(7) 0.094(13) 0.098(14) 0.046(11) 0.025(8) 0.038(9)
N21 0.027(4) 0.028(4) 0.011(3) 0.004(3) -0.001(3) 0.017(4)
N21S 0.050(17) 0.10(3) 0.043(15) 0.009(16) 0.000(13) 0.044(18)
N22 0.018(4) 0.019(4) 0.017(3) -0.001(3) 0.001(3) 0.008(3)
N22S 0.048(14) 0.026(10) 0.047(13) -0.008(9) -0.017(11) 0.020(10)
N31 0.021(4) 0.021(4) 0.028(4) -0.003(3) -0.002(3) 0.012(3)
N32 0.018(4) 0.016(4) 0.030(4) -0.001(3) -0.005(3) 0.008(3)
N41 0.023(4) 0.020(4) 0.025(4) -0.004(3) -0.006(3) 0.017(3)
N42 0.018(3) 0.023(4) 0.020(4) 0.003(3) -0.001(3) 0.014(3)
N51 0.028(4) 0.022(4) 0.023(4) 0.006(3) 0.004(3) 0.016(4)
N52 0.018(4) 0.011(3) 0.025(4) 0.004(3) 0.001(3) 0.008(3)
N61 0.028(4) 0.026(4) 0.019(4) 0.002(3) 0.005(3) 0.016(4)
N62 0.028(4) 0.029(4) 0.020(4) 0.001(3) 0.002(3) 0.020(4)
N71 0.019(4) 0.031(4) 0.017(3) 0.000(3) -0.003(3) 0.014(3)
N72 0.021(4) 0.021(4) 0.020(4) 0.001(3) -0.003(3) 0.014(3)
N81 0.028(5) 0.045(6) 0.024(4) 0.007(4) 0.005(3) 0.029(4)
N82 0.028(4) 0.027(4) 0.021(4) 0.002(3) 0.007(3) 0.021(4)
C13 0.024(5) 0.014(4) 0.036(6) -0.002(4) -0.011(4) 0.003(4)
C13S 0.042(11) 0.082(18) 0.20(4) 0.03(2) 0.024(16) 0.035(12)
C14 0.031(6) 0.032(6) 0.040(7) -0.007(5) -0.018(5) 0.011(5)
C14S 0.079(9) 0.086(9) 0.125(11) 0.010(8) 0.005(8) 0.050(8)
C15 0.032(6) 0.024(5) 0.026(5) -0.001(4) -0.009(4) 0.008(4)
C15S 0.079(9) 0.086(9) 0.125(11) 0.010(8) 0.005(8) 0.050(8)
C23 0.035(6) 0.041(6) 0.022(5) 0.012(4) 0.007(4) 0.024(5)
C23S 0.09(3) 0.07(2) 0.050(19) 0.021(18) 0.017(19) 0.06(2)
C24 0.039(7) 0.056(8) 0.017(5) 0.012(5) 0.008(4) 0.022(6)
C24S 0.09(4) 0.09(3) 0.08(3) 0.01(3) -0.06(3) 0.02(3)
C25 0.039(6) 0.032(6) 0.017(4) 0.006(4) 0.000(4) 0.022(5)
C25S 0.06(2) 0.022(12) 0.06(2) 0.018(13) -0.005(17) 0.015(13)
C33 0.022(5) 0.012(4) 0.039(6) 0.001(4) -0.006(4) 0.004(4)
C34 0.027(6) 0.010(4) 0.061(8) -0.002(5) -0.003(5) 0.003(4)
C35 0.026(5) 0.012(4) 0.042(6) -0.004(4) 0.001(4) 0.007(4)
C43 0.033(6) 0.046(7) 0.033(6) 0.011(5) 0.007(4) 0.034(6)
C44 0.042(7) 0.060(9) 0.033(6) 0.003(6) 0.011(5) 0.040(7)
C45 0.023(5) 0.031(5) 0.038(6) -0.006(5) 0.000(4) 0.019(4)
C53 0.033(6) 0.013(4) 0.043(7) -0.002(4) -0.009(5) 0.010(4)
C54 0.043(7) 0.015(5) 0.064(9) -0.006(5) -0.012(7) 0.016(5)
C55 0.031(6) 0.025(5) 0.043(6) 0.011(5) 0.001(5) 0.020(5)
C63 0.025(5) 0.041(6) 0.017(4) 0.000(4) 0.006(4) 0.020(5)
C64 0.032(6) 0.038(6) 0.015(4) 0.005(4) 0.005(4) 0.014(5)
C65 0.041(6) 0.039(6) 0.018(5) 0.011(4) 0.007(4) 0.024(5)
C73 0.039(7) 0.035(6) 0.044(7) -0.003(5) -0.019(6) 0.020(6)
C74 0.028(6) 0.041(7) 0.041(7) -0.006(6) -0.019(5) 0.005(5)
C75 0.029(6) 0.041(7) 0.031(6) 0.008(5) -0.004(5) 0.016(5)
C83 0.057(8) 0.055(8) 0.018(5) 0.002(5) 0.011(5) 0.043(7)
C84 0.071(11) 0.094(13) 0.028(6) -0.012(7) -0.003(6) 0.073(11)
C85 0.046(7) 0.078(11) 0.024(5) 0.008(6) 0.005(5) 0.051(8)

_geom_special_details            
;
 All esds (except the esd in the dihedral angle between two l.s. planes)
 are estimated using the full covariance matrix.  The cell esds are taken
 into account individually in the estimation of esds in distances, angles
 and torsion angles; correlations between esds in cell parameters are only
 used when they are defined by crystal symmetry.  An approximate (isotropic)
 treatment of cell esds is used for estimating esds involving l.s. planes.
;

loop_
_geom_bond_atom_site_label_1
_geom_bond_atom_site_label_2
_geom_bond_distance
_geom_bond_site_symmetry_2
_geom_bond_publ_flag
Mo1 O1 1.701(7) . ?
Mo1 O14 1.966(7) . ?
Mo1 O13 1.990(7) . ?
Mo1 O15 2.041(7) . ?
Mo1 N21 2.151(9) . ?
Mo1 N11 2.196(8) . ?
Mo1 Mo2 2.6143(11) . ?
Mo2 O2 1.707(7) . ?
Mo2 O13 1.972(7) . ?
Mo2 O14 1.990(7) . ?
Mo2 O16 2.038(7) . ?
Mo2 N41 2.144(9) . ?
Mo2 N31 2.179(9) . ?
Mo3 O3 1.706(7) . ?
Mo3 O25 1.924(7) . ?
Mo3 O17 1.955(7) . ?
Mo3 O15 2.107(7) . ?
Mo3 O13 2.179(7) . ?
Mo3 N12 2.189(9) . ?
Mo3 Mo7 2.5818(11) . ?
Mo4 O4 1.709(7) . ?
Mo4 O26 1.923(7) . ?
Mo4 O18 1.965(7) . ?
Mo4 O16 2.112(7) . ?
Mo4 O14 2.183(7) . ?
Mo4 N32 2.190(9) . ?
Mo4 Mo8 2.5815(11) . ?
Mo5 O5 1.689(7) . ?
Mo5 O28 1.965(7) . ?
Mo5 O19 1.975(6) . ?
Mo5 O15 2.016(6) . ?
Mo5 N22 2.154(8) . ?
Mo5 O18 2.291(7) . ?
Mo5 Mo9 2.5773(11) . ?
Mo6 O6 1.695(7) . ?
Mo6 O27 1.961(7) . ?
Mo6 O20 1.971(6) . ?
Mo6 O16 2.014(7) . ?
Mo6 N42 2.162(8) . ?
Mo6 O17 2.297(7) . ?
Mo6 Mo10 2.5786(11) . ?
Mo7 O7 1.688(7) . ?
Mo7 O17 1.971(7) . ?
Mo7 O25 1.972(7) . ?
Mo7 O21 2.002(7) . ?
Mo7 N52 2.167(8) . ?
Mo7 O19 2.287(7) . ?
Mo8 O8 1.687(7) . ?
Mo8 O18 1.969(7) . ?
Mo8 O26 1.977(7) . ?
Mo8 O22 2.017(7) . ?
Mo8 N72 2.143(8) . ?
Mo8 O20 2.297(6) . ?
Mo9 O9 1.702(8) . ?
Mo9 O28 1.923(7) . ?
Mo9 O19 1.974(7) . ?
Mo9 O22 2.110(7) . ?
Mo9 O23 2.187(7) . ?
Mo9 N82 2.187(9) . ?
Mo10 O10 1.705(7) . ?
Mo10 O27 1.916(7) . ?
Mo10 O20 1.968(6) . ?
Mo10 O21 2.125(7) . ?
Mo10 O24 2.153(7) . ?
Mo10 N62 2.188(9) . ?
Mo11 O11 1.704(8) . ?
Mo11 O23 1.967(7) . ?
Mo11 O24 1.988(8) . ?
Mo11 O21 2.048(7) . ?
Mo11 N51 2.155(10) . ?
Mo11 N61 2.197(9) . ?
Mo11 Mo12 2.6225(12) . ?
Mo12 O12 1.707(7) . ?
Mo12 O24 1.981(7) . ?
Mo12 O23 1.981(7) . ?
Mo12 O22 2.051(7) . ?
Mo12 N71 2.152(10) . ?
Mo12 N81 2.169(9) . ?
O2WA O2WB 1.68(3) . ?
O5WA O5WB 1.70(7) . ?
N11 C15 1.349(14) . ?
N11 N12 1.358(12) . ?
N11S N12S 1.30(2) . ?
N11S C15S 1.32(3) . ?
N12 C13 1.350(13) . ?
N12S C13S 1.327(13) . ?
N21 C25 1.335(13) . ?
N21 N22 1.375(12) . ?
N21S C25S 1.332(14) . ?
N21S N22S 1.352(14) . ?
N22 C23 1.340(14) . ?
N22S C23S 1.341(14) . ?
N31 C35 1.346(13) . ?
N31 N32 1.348(12) . ?
N32 C33 1.336(13) . ?
N41 C45 1.354(13) . ?
N41 N42 1.372(11) . ?
N42 C43 1.337(14) . ?
N51 N52 1.358(12) . ?
N51 C55 1.368(14) . ?
N52 C53 1.329(14) . ?
N61 N62 1.342(13) . ?
N61 C65 1.371(13) . ?
N62 C63 1.334(13) . ?
N71 C75 1.330(15) . ?
N71 N72 1.376(12) . ?
N72 C73 1.318(16) . ?
N81 N82 1.345(14) . ?
N81 C85 1.349(14) . ?
N82 C83 1.354(14) . ?
C13 C14 1.391(17) . ?
C13S C14S 1.39(3) . ?
C14 C15 1.401(19) . ?
C14S C15S 1.342(14) . ?
C23 C24 1.412(17) . ?
C23S C24S 1.28(6) . ?
C24 C25 1.367(18) . ?
C24S C25S 1.354(14) . ?
C33 C34 1.388(17) . ?
C34 C35 1.351(16) . ?
C43 C44 1.372(16) . ?
C44 C45 1.410(18) . ?
C53 C54 1.404(17) . ?
C54 C55 1.366(19) . ?
C63 C64 1.376(17) . ?
C64 C65 1.369(18) . ?
C73 C74 1.398(18) . ?
C74 C75 1.37(2) . ?
C83 C84 1.40(2) . ?
C84 C85 1.389(19) . ?

loop_
_geom_angle_atom_site_label_1
_geom_angle_atom_site_label_2
_geom_angle_atom_site_label_3
_geom_angle
_geom_angle_site_symmetry_1
_geom_angle_site_symmetry_3
_geom_angle_publ_flag
O1 Mo1 O14 103.3(3) . . ?
O1 Mo1 O13 112.7(3) . . ?
O14 Mo1 O13 94.1(3) . . ?
O1 Mo1 O15 156.8(3) . . ?
O14 Mo1 O15 97.2(3) . . ?
O13 Mo1 O15 76.0(3) . . ?
O1 Mo1 N21 89.9(4) . . ?
O14 Mo1 N21 82.4(3) . . ?
O13 Mo1 N21 157.3(3) . . ?
O15 Mo1 N21 82.2(3) . . ?
O1 Mo1 N11 83.6(3) . . ?
O14 Mo1 N11 173.0(3) . . ?
O13 Mo1 N11 82.7(3) . . ?
O15 Mo1 N11 76.0(3) . . ?
N21 Mo1 N11 98.1(4) . . ?
O1 Mo1 Mo2 102.6(3) . . ?
O14 Mo1 Mo2 49.0(2) . . ?
O13 Mo1 Mo2 48.4(2) . . ?
O15 Mo1 Mo2 99.01(19) . . ?
N21 Mo1 Mo2 131.4(3) . . ?
N11 Mo1 Mo2 129.6(2) . . ?
O2 Mo2 O13 102.7(3) . . ?
O2 Mo2 O14 112.3(3) . . ?
O13 Mo2 O14 93.9(3) . . ?
O2 Mo2 O16 159.1(3) . . ?
O13 Mo2 O16 95.7(3) . . ?
O14 Mo2 O16 75.8(3) . . ?
O2 Mo2 N41 90.9(3) . . ?
O13 Mo2 N41 83.7(3) . . ?
O14 Mo2 N41 156.6(3) . . ?
O16 Mo2 N41 81.2(3) . . ?
O2 Mo2 N31 84.8(3) . . ?
O13 Mo2 N31 172.5(3) . . ?
O14 Mo2 N31 82.7(3) . . ?
O16 Mo2 N31 77.0(3) . . ?
N41 Mo2 N31 96.7(3) . . ?
O2 Mo2 Mo1 101.8(3) . . ?
O13 Mo2 Mo1 49.0(2) . . ?
O14 Mo2 Mo1 48.25(19) . . ?
O16 Mo2 Mo1 97.79(19) . . ?
N41 Mo2 Mo1 132.6(2) . . ?
N31 Mo2 Mo1 129.6(3) . . ?
O3 Mo3 O25 105.1(3) . . ?
O3 Mo3 O17 104.4(3) . . ?
O25 Mo3 O17 96.8(3) . . ?
O3 Mo3 O15 158.0(3) . . ?
O25 Mo3 O15 91.1(3) . . ?
O17 Mo3 O15 87.8(3) . . ?
O3 Mo3 O13 90.0(3) . . ?
O25 Mo3 O13 158.3(3) . . ?
O17 Mo3 O13 94.3(3) . . ?
O15 Mo3 O13 70.7(3) . . ?
O3 Mo3 N12 88.9(4) . . ?
O25 Mo3 N12 86.3(3) . . ?
O17 Mo3 N12 164.8(3) . . ?
O15 Mo3 N12 77.2(3) . . ?
O13 Mo3 N12 78.4(3) . . ?
O3 Mo3 Mo7 102.3(3) . . ?
O25 Mo3 Mo7 49.3(2) . . ?
O17 Mo3 Mo7 49.2(2) . . ?
O15 Mo3 Mo7 99.50(18) . . ?
O13 Mo3 Mo7 143.16(18) . . ?
N12 Mo3 Mo7 135.6(2) . . ?
O4 Mo4 O26 104.8(3) . . ?
O4 Mo4 O18 105.1(3) . . ?
O26 Mo4 O18 96.7(3) . . ?
O4 Mo4 O16 158.0(3) . . ?
O26 Mo4 O16 92.3(3) . . ?
O18 Mo4 O16 86.2(3) . . ?
O4 Mo4 O14 89.8(3) . . ?
O26 Mo4 O14 159.3(3) . . ?
O18 Mo4 O14 93.5(3) . . ?
O16 Mo4 O14 70.4(3) . . ?
O4 Mo4 N32 90.3(4) . . ?
O26 Mo4 N32 86.1(3) . . ?
O18 Mo4 N32 163.0(3) . . ?
O16 Mo4 N32 76.9(3) . . ?
O14 Mo4 N32 79.1(3) . . ?
O4 Mo4 Mo8 101.9(3) . . ?
O26 Mo4 Mo8 49.5(2) . . ?
O18 Mo4 Mo8 49.07(19) . . ?
O16 Mo4 Mo8 99.78(18) . . ?
O14 Mo4 Mo8 142.40(18) . . ?
N32 Mo4 Mo8 135.5(2) . . ?
O5 Mo5 O28 102.1(3) . . ?
O5 Mo5 O19 103.5(3) . . ?
O28 Mo5 O19 95.2(3) . . ?
O5 Mo5 O15 98.6(3) . . ?
O28 Mo5 O15 156.8(3) . . ?
O19 Mo5 O15 90.1(3) . . ?
O5 Mo5 N22 93.2(3) . . ?
O28 Mo5 N22 86.2(3) . . ?
O19 Mo5 N22 162.6(3) . . ?
O15 Mo5 N22 82.2(3) . . ?
O5 Mo5 O18 172.8(3) . . ?
O28 Mo5 O18 79.7(3) . . ?
O19 Mo5 O18 83.2(3) . . ?
O15 Mo5 O18 78.6(3) . . ?
N22 Mo5 O18 79.9(3) . . ?
O5 Mo5 Mo9 98.3(3) . . ?
O28 Mo5 Mo9 47.8(2) . . ?
O19 Mo5 Mo9 49.2(2) . . ?
O15 Mo5 Mo9 138.6(2) . . ?
N22 Mo5 Mo9 133.9(2) . . ?
O18 Mo5 Mo9 88.00(17) . . ?
O6 Mo6 O27 102.0(3) . . ?
O6 Mo6 O20 102.4(3) . . ?
O27 Mo6 O20 95.0(3) . . ?
O6 Mo6 O16 98.7(3) . . ?
O27 Mo6 O16 156.6(3) . . ?
O20 Mo6 O16 91.1(3) . . ?
O6 Mo6 N42 92.6(3) . . ?
O27 Mo6 N42 86.6(3) . . ?
O20 Mo6 N42 164.2(3) . . ?
O16 Mo6 N42 81.6(3) . . ?
O6 Mo6 O17 173.3(3) . . ?
O27 Mo6 O17 79.5(3) . . ?
O20 Mo6 O17 83.9(3) . . ?
O16 Mo6 O17 78.7(3) . . ?
N42 Mo6 O17 81.0(3) . . ?
O6 Mo6 Mo10 98.2(3) . . ?
O27 Mo6 Mo10 47.6(2) . . ?
O20 Mo6 Mo10 49.07(19) . . ?
O16 Mo6 Mo10 139.27(19) . . ?
N42 Mo6 Mo10 134.2(2) . . ?
O17 Mo6 Mo10 87.67(17) . . ?
O7 Mo7 O17 102.9(3) . . ?
O7 Mo7 O25 102.1(3) . . ?
O17 Mo7 O25 94.7(3) . . ?
O7 Mo7 O21 98.5(3) . . ?
O17 Mo7 O21 90.7(3) . . ?
O25 Mo7 O21 156.9(3) . . ?
O7 Mo7 N52 93.9(3) . . ?
O17 Mo7 N52 162.5(3) . . ?
O25 Mo7 N52 86.2(3) . . ?
O21 Mo7 N52 82.1(3) . . ?
O7 Mo7 O19 173.3(3) . . ?
O17 Mo7 O19 83.5(3) . . ?
O25 Mo7 O19 79.1(3) . . ?
O21 Mo7 O19 79.2(3) . . ?
N52 Mo7 O19 79.5(3) . . ?
O7 Mo7 Mo3 98.7(3) . . ?
O17 Mo7 Mo3 48.60(19) . . ?
O25 Mo7 Mo3 47.7(2) . . ?
O21 Mo7 Mo3 138.43(19) . . ?
N52 Mo7 Mo3 133.8(2) . . ?
O19 Mo7 Mo3 87.00(17) . . ?
O8 Mo8 O18 103.5(3) . . ?
O8 Mo8 O26 101.3(3) . . ?
O18 Mo8 O26 94.8(3) . . ?
O8 Mo8 O22 100.0(3) . . ?
O18 Mo8 O22 91.0(3) . . ?
O26 Mo8 O22 156.0(3) . . ?
O8 Mo8 N72 92.6(4) . . ?
O18 Mo8 N72 163.3(3) . . ?
O26 Mo8 N72 86.3(3) . . ?
O22 Mo8 N72 81.6(3) . . ?
O8 Mo8 O20 173.6(3) . . ?
O18 Mo8 O20 82.9(3) . . ?
O26 Mo8 O20 79.0(3) . . ?
O22 Mo8 O20 78.6(3) . . ?
N72 Mo8 O20 81.0(3) . . ?
O8 Mo8 Mo4 97.9(3) . . ?
O18 Mo8 Mo4 48.93(19) . . ?
O26 Mo8 Mo4 47.7(2) . . ?
O22 Mo8 Mo4 139.1(2) . . ?
N72 Mo8 Mo4 133.9(2) . . ?
O20 Mo8 Mo4 87.09(16) . . ?
O9 Mo9 O28 105.7(3) . . ?
O9 Mo9 O19 104.5(4) . . ?
O28 Mo9 O19 96.6(3) . . ?
O9 Mo9 O22 158.7(3) . . ?
O28 Mo9 O22 90.7(3) . . ?
O19 Mo9 O22 86.7(3) . . ?
O9 Mo9 O23 90.0(3) . . ?
O28 Mo9 O23 158.7(3) . . ?
O19 Mo9 O23 93.2(3) . . ?
O22 Mo9 O23 71.0(3) . . ?
O9 Mo9 N82 90.3(4) . . ?
O28 Mo9 N82 86.6(3) . . ?
O19 Mo9 N82 163.3(3) . . ?
O22 Mo9 N82 76.8(3) . . ?
O23 Mo9 N82 78.9(3) . . ?
O9 Mo9 Mo5 102.0(3) . . ?
O28 Mo9 Mo5 49.2(2) . . ?
O19 Mo9 Mo5 49.27(19) . . ?
O22 Mo9 Mo5 99.05(19) . . ?
O23 Mo9 Mo5 142.26(18) . . ?
N82 Mo9 Mo5 135.8(2) . . ?
O10 Mo10 O27 104.6(3) . . ?
O10 Mo10 O20 104.6(3) . . ?
O27 Mo10 O20 96.6(3) . . ?
O10 Mo10 O21 159.1(3) . . ?
O27 Mo10 O21 91.2(3) . . ?
O20 Mo10 O21 86.8(3) . . ?
O10 Mo10 O24 90.4(3) . . ?
O27 Mo10 O24 159.5(3) . . ?
O20 Mo10 O24 93.0(3) . . ?
O21 Mo10 O24 71.3(3) . . ?
O10 Mo10 N62 90.0(4) . . ?
O27 Mo10 N62 86.5(3) . . ?
O20 Mo10 N62 163.7(3) . . ?
O21 Mo10 N62 77.2(3) . . ?
O24 Mo10 N62 79.5(3) . . ?
O10 Mo10 Mo6 101.9(3) . . ?
O27 Mo10 Mo6 49.1(2) . . ?
O20 Mo10 Mo6 49.15(19) . . ?
O21 Mo10 Mo6 98.78(18) . . ?
O24 Mo10 Mo6 141.93(19) . . ?
N62 Mo10 Mo6 135.5(2) . . ?
O11 Mo11 O23 103.4(3) . . ?
O11 Mo11 O24 112.7(3) . . ?
O23 Mo11 O24 93.4(3) . . ?
O11 Mo11 O21 156.9(3) . . ?
O23 Mo11 O21 97.0(3) . . ?
O24 Mo11 O21 76.3(3) . . ?
O11 Mo11 N51 91.2(4) . . ?
O23 Mo11 N51 82.2(3) . . ?
O24 Mo11 N51 156.0(3) . . ?
O21 Mo11 N51 80.9(3) . . ?
O11 Mo11 N61 83.8(4) . . ?
O23 Mo11 N61 172.6(3) . . ?
O24 Mo11 N61 82.2(3) . . ?
O21 Mo11 N61 76.2(3) . . ?
N51 Mo11 N61 99.4(4) . . ?
O11 Mo11 Mo12 101.6(3) . . ?
O23 Mo11 Mo12 48.6(2) . . ?
O24 Mo11 Mo12 48.5(2) . . ?
O21 Mo11 Mo12 99.92(19) . . ?
N51 Mo11 Mo12 130.7(2) . . ?
N61 Mo11 Mo12 129.0(3) . . ?
O12 Mo12 O24 102.9(3) . . ?
O12 Mo12 O23 113.7(3) . . ?
O24 Mo12 O23 93.2(3) . . ?
O12 Mo12 O22 157.6(3) . . ?
O24 Mo12 O22 96.2(3) . . ?
O23 Mo12 O22 76.5(3) . . ?
O12 Mo12 N71 89.5(4) . . ?
O24 Mo12 N71 84.2(3) . . ?
O23 Mo12 N71 156.6(3) . . ?
O22 Mo12 N71 80.7(3) . . ?
O12 Mo12 N81 84.5(3) . . ?
O24 Mo12 N81 172.3(3) . . ?
O23 Mo12 N81 81.9(4) . . ?
O22 Mo12 N81 77.0(3) . . ?
N71 Mo12 N81 98.0(4) . . ?
O12 Mo12 Mo11 102.0(3) . . ?
O24 Mo12 Mo11 48.7(2) . . ?
O23 Mo12 Mo11 48.2(2) . . ?
O22 Mo12 Mo11 99.4(2) . . ?
N71 Mo12 Mo11 132.8(2) . . ?
N81 Mo12 Mo11 128.3(3) . . ?
Mo2 O13 Mo1 82.6(3) . . ?
Mo2 O13 Mo3 135.3(3) . . ?
Mo1 O13 Mo3 103.2(3) . . ?
Mo1 O14 Mo2 82.7(3) . . ?
Mo1 O14 Mo4 134.8(3) . . ?
Mo2 O14 Mo4 103.0(3) . . ?
Mo5 O15 Mo1 129.7(3) . . ?
Mo5 O15 Mo3 126.3(3) . . ?
Mo1 O15 Mo3 104.0(3) . . ?
Mo6 O16 Mo2 130.8(4) . . ?
Mo6 O16 Mo4 125.1(3) . . ?
Mo2 O16 Mo4 103.9(3) . . ?
Mo3 O17 Mo7 82.2(3) . . ?
Mo3 O17 Mo6 145.1(3) . . ?
Mo7 O17 Mo6 132.3(3) . . ?
Mo4 O18 Mo8 82.0(3) . . ?
Mo4 O18 Mo5 145.8(3) . . ?
Mo8 O18 Mo5 131.5(3) . . ?
Mo9 O19 Mo5 81.5(2) . . ?
Mo9 O19 Mo7 144.7(3) . . ?
Mo5 O19 Mo7 132.6(3) . . ?
Mo10 O20 Mo6 81.8(2) . . ?
Mo10 O20 Mo8 145.4(3) . . ?
Mo6 O20 Mo8 131.7(3) . . ?
Mo7 O21 Mo11 130.2(3) . . ?
Mo7 O21 Mo10 127.3(3) . . ?
Mo11 O21 Mo10 102.5(3) . . ?
Mo8 O22 Mo12 130.3(4) . . ?
Mo8 O22 Mo9 126.5(3) . . ?
Mo12 O22 Mo9 103.2(3) . . ?
Mo11 O23 Mo12 83.2(3) . . ?
Mo11 O23 Mo9 135.7(4) . . ?
Mo12 O23 Mo9 102.9(3) . . ?
Mo12 O24 Mo11 82.7(3) . . ?
Mo12 O24 Mo10 136.7(4) . . ?
Mo11 O24 Mo10 103.6(3) . . ?
Mo3 O25 Mo7 83.0(3) . . ?
Mo4 O26 Mo8 82.9(3) . . ?
Mo10 O27 Mo6 83.4(3) . . ?
Mo9 O28 Mo5 83.0(3) . . ?
C15 N11 N12 108.6(9) . . ?
C15 N11 Mo1 133.6(7) . . ?
N12 N11 Mo1 115.0(6) . . ?
N12S N11S C15S 102.7(18) . . ?
C13 N12 N11 108.4(9) . . ?
C13 N12 Mo3 134.7(8) . . ?
N11 N12 Mo3 116.2(6) . . ?
N11S N12S C13S 114.1(17) . . ?
C25 N21 N22 108.4(9) . . ?
C25 N21 Mo1 128.5(8) . . ?
N22 N21 Mo1 120.4(6) . . ?
C25S N21S N22S 112(2) . . ?
C23 N22 N21 108.0(8) . . ?
C23 N22 Mo5 129.5(7) . . ?
N21 N22 Mo5 122.2(6) . . ?
C23S N22S N21S 100(2) . . ?
C35 N31 N32 107.8(9) . . ?
C35 N31 Mo2 135.0(8) . . ?
N32 N31 Mo2 115.8(7) . . ?
C33 N32 N31 109.0(9) . . ?
C33 N32 Mo4 134.2(8) . . ?
N31 N32 Mo4 116.3(6) . . ?
C45 N41 N42 108.3(9) . . ?
C45 N41 Mo2 128.2(8) . . ?
N42 N41 Mo2 121.7(6) . . ?
C43 N42 N41 107.8(8) . . ?
C43 N42 Mo6 130.3(7) . . ?
N41 N42 Mo6 121.5(6) . . ?
N52 N51 C55 107.3(9) . . ?
N52 N51 Mo11 121.3(6) . . ?
C55 N51 Mo11 126.2(8) . . ?
C53 N52 N51 109.5(8) . . ?
C53 N52 Mo7 130.0(7) . . ?
N51 N52 Mo7 120.5(6) . . ?
N62 N61 C65 107.5(9) . . ?
N62 N61 Mo11 115.9(7) . . ?
C65 N61 Mo11 133.4(8) . . ?
C63 N62 N61 108.0(9) . . ?
C63 N62 Mo10 135.2(8) . . ?
N61 N62 Mo10 115.6(6) . . ?
C75 N71 N72 108.7(10) . . ?
C75 N71 Mo12 129.1(8) . . ?
N72 N71 Mo12 120.6(6) . . ?
C73 N72 N71 107.3(9) . . ?
C73 N72 Mo8 129.6(8) . . ?
N71 N72 Mo8 121.8(6) . . ?
N82 N81 C85 107.5(10) . . ?
N82 N81 Mo12 116.5(6) . . ?
C85 N81 Mo12 134.0(8) . . ?
N81 N82 C83 108.7(10) . . ?
N81 N82 Mo9 115.7(6) . . ?
C83 N82 Mo9 134.3(9) . . ?
N12 C13 C14 109.2(11) . . ?
N12S C13S C14S 106(2) . . ?
C13 C14 C15 105.0(10) . . ?
C15S C14S C13S 102(2) . . ?
N11 C15 C14 108.8(10) . . ?
N11S C15S C14S 115(3) . . ?
N22 C23 C24 108.4(11) . . ?
C24S C23S N22S 116(3) . . ?
C25 C24 C23 105.4(10) . . ?
C23S C24S C25S 105(3) . . ?
N21 C25 C24 109.8(10) . . ?
N21S C25S C24S 106(3) . . ?
N32 C33 C34 107.7(10) . . ?
C35 C34 C33 106.5(10) . . ?
N31 C35 C34 109.1(10) . . ?
N42 C43 C44 110.7(10) . . ?
C43 C44 C45 104.9(10) . . ?
N41 C45 C44 108.3(10) . . ?
N52 C53 C54 108.4(11) . . ?
C55 C54 C53 105.7(10) . . ?
C54 C55 N51 109.1(10) . . ?
N62 C63 C64 110.8(11) . . ?
C65 C64 C63 104.3(9) . . ?
C64 C65 N61 109.4(11) . . ?
N72 C73 C74 109.7(12) . . ?
C75 C74 C73 105.0(11) . . ?
N71 C75 C74 109.1(11) . . ?
N82 C83 C84 109.7(11) . . ?
C85 C84 C83 103.2(11) . . ?
N81 C85 C84 111.0(12) . . ?

_refine_diff_density_max         2.197
_refine_diff_density_min         -2.089
_refine_diff_density_rms         0.292

_shelx_res_file                  
;

    D:\Job\SHESTO~1\JUL167_1\S4_HR_~1\jul167-1.res created by SHELXL-2014/7

TITL mo_CCU_JUL167_1_m4_0m in R3c #161
CELL 0.71073 38.3453 38.3453 22.8946 90.000 90.000 120.000
ZERR 18.0000 0.0015 0.0015 0.0011 0.000 0.000 0.000
LATT -3
SYMM -Y, X-Y, Z
SYMM -X+Y, -X, Z
SYMM -X+Y, Y, 0.5+Z
SYMM X, X-Y, 0.5+Z
SYMM -Y, -X, 0.5+Z
SFAC C MO N O H
UNIT 513 216 414 585 990
MERG 2
OMIT 0 180
FMAP 2
GRID
PLAN 10
TEMP -123
SIZE 0.082 0.083 0.114
OMIT       0 3 0
OMIT       -1 1 -2
OMIT       -6 12 0
OMIT       -4 4 -2
OMIT       0 4 -4
OMIT       -4 4 4
OMIT       0 4 2
TWIN
EADP O5WA O5WB
EADP O2WB O2WA
EADP O4WB O4WC
DFIX 1.35 0.01 C15S C14S
DFIX 1.35 0.01 N22S C23S
DFIX 1.35 0.01 C25S C24S
DFIX 1.35 0.01 N22S N21S
DFIX 1.35 0.01 C25S N21S
DFIX 1.35 0.01 C13S N12S
ISOR 0.008 0.008 O3WC C15S
EADP O3WC O3WD
EADP C15S C14S
L.S. 10
ACTA 50.5
WGHT    0.049500  637.567017
BASF   0.01174
FVAR       0.02732   0.44190   0.66487
MO1   2    0.147515    0.062519    0.282760    11.00000    0.01595    0.01557 =
         0.01660    0.00040   -0.00380    0.00743
MO2   2    0.164792    0.117151    0.363240    11.00000    0.01510    0.01357 =
         0.02040    0.00038   -0.00293    0.00743
MO3   2    0.111280    0.003918    0.396868    11.00000    0.01286    0.01364 =
         0.01801   -0.00016   -0.00157    0.00563
MO4   2    0.251823    0.121346    0.353459    11.00000    0.01339    0.01410 =
         0.01599    0.00150   -0.00088    0.00616
MO5   2    0.193658    0.001219    0.318522    11.00000    0.01672    0.01524 =
         0.01351    0.00027    0.00039    0.00839
MO6   2    0.201115    0.090091    0.495125    11.00000    0.01333    0.01530 =
         0.01501   -0.00069   -0.00038    0.00807
MO7   2    0.140098   -0.026243    0.470337    11.00000    0.01517    0.01470 =
         0.01505    0.00106    0.00086    0.00787
MO8   2    0.284387    0.084689    0.404659    11.00000    0.01407    0.01771 =
         0.01512    0.00096   -0.00017    0.00924
MO9   2    0.232004   -0.024947    0.380271    11.00000    0.02043    0.01729 =
         0.01466    0.00101    0.00279    0.01251
MO10  2    0.224088    0.050091    0.559457    11.00000    0.01676    0.01874 =
         0.01304   -0.00041    0.00024    0.01118
MO11  2    0.218255   -0.037218    0.546943    11.00000    0.02170    0.02036 =
         0.01490    0.00328    0.00223    0.01457
MO12  2    0.288311    0.007722    0.496748    11.00000    0.01881    0.02484 =
         0.01661    0.00295    0.00175    0.01579
O1    4    0.129908    0.078974    0.227255    11.00000    0.02038    0.02133 =
         0.02370    0.00273   -0.00670    0.00695
O1W   4    0.133676    0.257598    0.303380    10.75000    0.07020    0.05255 =
         0.06850    0.01406    0.01187    0.03739
O2    4    0.142020    0.142336    0.336453    11.00000    0.01982    0.01845 =
         0.02893    0.00520   -0.00280    0.01151
O2WA  4    0.127269    0.369835    0.381634    21.00000    0.03319    0.04017 =
         0.03822    0.00118   -0.00478    0.01789
O2WB  4    0.154340    0.350598    0.352732   -21.00000    0.03319    0.04017 =
         0.03822    0.00118   -0.00478    0.01789
O3    4    0.070214   -0.000922    0.433109    11.00000    0.01759    0.02229 =
         0.02951   -0.00049   -0.00261    0.01252
PART 1
O3WA  4    0.199090    0.326829    0.275513    10.50000    0.00981    0.03605 =
         0.04234   -0.00047    0.00409    0.00981
PART 3
O3WB  4    0.228203    0.322784    0.355804    10.50000    0.02890    0.03753 =
         0.04020    0.00585   -0.00259   -0.00349
PART 2
O3WC  4    0.227721    0.332741    0.307103    10.25000    0.03915    0.01923 =
         0.03553   -0.01054    0.00425    0.02159
PART 4
O3WD  4    0.192811    0.304743    0.317502    10.25000    0.03915    0.01923 =
         0.03553   -0.01054    0.00425    0.02159
PART 0
O4    4    0.280601    0.139464    0.291865    11.00000    0.01815    0.02194 =
         0.02280    0.00906    0.00351    0.00691
PART 3
O4WA  4    0.046045    0.045697    0.057435    10.50000    0.04813    0.08390 =
         0.06017    0.02710    0.01447    0.04318
PART 2
O4WB  4    0.034843    0.031910    0.095498    10.25000    0.06678    0.10994 =
         0.04090   -0.01322   -0.02994    0.05539
PART 1
O4WC  4    0.000000    0.000000    0.085284    10.16667    0.06678    0.10994 =
         0.04090   -0.01322   -0.02994    0.05539
PART 0
O5    4    0.162218   -0.042033    0.283396    11.00000    0.02237    0.02006 =
         0.02082   -0.00271    0.00099    0.00798
O5WA  4    0.000000    0.000000    0.390542    30.33333    0.05370    0.05370 =
         0.05221    0.00000    0.00000    0.02685
O5WB  4    0.000000    0.000000    0.464801   -30.33333    0.05370    0.05370 =
         0.05221    0.00000    0.00000    0.02685
O6    4    0.231084    0.136311    0.524327    11.00000    0.02370    0.01868 =
         0.02194   -0.00512   -0.00466    0.01029
O7    4    0.105446   -0.039096    0.523731    11.00000    0.01710    0.02330 =
         0.02042    0.00321    0.00786    0.00963
O8    4    0.321212    0.095500    0.355506    11.00000    0.01534    0.02935 =
         0.02778    0.00244    0.00454    0.01235
O9    4    0.208611   -0.074456    0.361174    11.00000    0.03543    0.01804 =
         0.02370    0.00150    0.00389    0.01343
O10   4    0.259314    0.086900    0.603040    11.00000    0.01963    0.02602 =
         0.02055   -0.00434   -0.00518    0.01019
O11   4    0.227745   -0.068116    0.589219    11.00000    0.03231    0.03083 =
         0.01918    0.00145    0.00084    0.02182
O12   4    0.319180   -0.002866    0.537453    11.00000    0.02684    0.02898 =
         0.02120    0.00181   -0.00108    0.01961
O13   4    0.121501    0.060385    0.358914    11.00000    0.01576    0.01385 =
         0.02232   -0.00117   -0.00464    0.00733
O14   4    0.198809    0.110548    0.303617    11.00000    0.01529    0.01471 =
         0.01911    0.00115   -0.00351    0.00709
O15   4    0.155139    0.021927    0.330686    11.00000    0.01143    0.01452 =
         0.01933    0.00168    0.00079    0.00696
O16   4    0.203315    0.106444    0.410993    11.00000    0.01881    0.01626 =
         0.01878    0.00112   -0.00048    0.01166
O17   4    0.155305    0.029972    0.453124    11.00000    0.01511    0.01291 =
         0.01723   -0.00023   -0.00113    0.00495
O18   4    0.235580    0.063968    0.356180    11.00000    0.01426    0.01395 =
         0.01790   -0.00082   -0.00235    0.00701
O19   4    0.187705   -0.015170    0.401354    11.00000    0.02065    0.01445 =
         0.01402    0.00288    0.00317    0.01019
O20   4    0.239525    0.071243    0.479550    11.00000    0.01394    0.01875 =
         0.01566    0.00232    0.00233    0.01011
O21   4    0.188964   -0.007574    0.520618    11.00000    0.01850    0.01560 =
         0.01513    0.00057   -0.00128    0.00907
O22   4    0.270270    0.028210    0.426782    11.00000    0.02340    0.02055 =
         0.01495    0.00148    0.00324    0.01533
O23   4    0.238705   -0.040794    0.469683    11.00000    0.02459    0.01886 =
         0.01670    0.00227    0.00356    0.01414
O24   4    0.259280    0.020571    0.556833    11.00000    0.01960    0.02542 =
         0.01826    0.00431    0.00278    0.01615
O25   4    0.106144   -0.048590    0.400239    11.00000    0.01444    0.01357 =
         0.02082   -0.00114   -0.00053    0.00566
O26   4    0.289922    0.138303    0.416622    11.00000    0.01734    0.01586 =
         0.01985   -0.00276   -0.00372    0.00661
O27   4    0.177938    0.056828    0.565051    11.00000    0.01798    0.02327 =
         0.01741   -0.00183    0.00254    0.01172
O28   4    0.246068    0.004487    0.307961    11.00000    0.02060    0.01928 =
         0.01636   -0.00058    0.00178    0.01188
N1N   3    0.309302    0.203731    0.494686    11.00000    0.03134    0.02754 =
         0.03208   -0.00113    0.01061   -0.00207
N2N   3    0.285128    0.338127    0.436773    11.00000    0.03082    0.06231 =
         0.08321   -0.02551    0.01032    0.01782
N3N   3    0.097348    0.177784    0.291194    11.00000    0.05182    0.07754 =
         0.07270    0.04477    0.03080    0.04896
N4N   3    0.105153    0.102830    0.126352    11.00000    0.05467    0.09790 =
         0.03207    0.02988    0.01255    0.04602
N11   3    0.091606    0.005197    0.268347    11.00000    0.02284    0.01196 =
         0.01985    0.00105   -0.00222    0.00202
N11S  3    0.439789    0.081537    0.361533    11.00000    0.03907    0.06005 =
         0.06506   -0.00945   -0.00722    0.01386
N12   3    0.074927   -0.017067    0.317240    11.00000    0.01735    0.01331 =
         0.02558    0.00115   -0.00423    0.00232
N12S  3    0.465813    0.118561    0.348429    11.00000    0.03762    0.09375 =
         0.09797    0.04604    0.02521    0.03834
AFIX  43
H12S  5    0.490786    0.126373    0.338230    11.00000   -1.20000
AFIX   0
N21   3    0.185200    0.053696    0.221988    11.00000    0.02671    0.02806 =
         0.01057    0.00427   -0.00121    0.01680
N21S  3    0.506087    0.216487    0.497738    10.50000    0.05049    0.09582 =
         0.04287    0.00916   -0.00046    0.04394
AFIX  43
H21S  5    0.525258    0.214461    0.515794    10.50000   -1.20000
AFIX   0
N22   3    0.207713    0.036874    0.240193    11.00000    0.01791    0.01889 =
         0.01654   -0.00092    0.00126    0.00838
N22S  3    0.505776    0.251372    0.491166    10.50000    0.04753    0.02639 =
         0.04710   -0.00846   -0.01700    0.02048
N31   3    0.217629    0.176853    0.372123    11.00000    0.02144    0.02133 =
         0.02758   -0.00262   -0.00235    0.01191
N32   3    0.253484    0.178825    0.365233    11.00000    0.01784    0.01603 =
         0.02958   -0.00083   -0.00488    0.00847
N41   3    0.140434    0.114767    0.448400    11.00000    0.02345    0.01994 =
         0.02550   -0.00351   -0.00577    0.01680
N42   3    0.149052    0.097914    0.495081    11.00000    0.01787    0.02310 =
         0.01973    0.00263   -0.00055    0.01392
N51   3    0.163751   -0.087766    0.513992    11.00000    0.02781    0.02236 =
         0.02338    0.00631    0.00434    0.01626
N52   3    0.140137   -0.082688    0.474706    11.00000    0.01795    0.01104 =
         0.02512    0.00418    0.00105    0.00768
N61   3    0.194985   -0.026613    0.628708    11.00000    0.02780    0.02623 =
         0.01926    0.00243    0.00466    0.01594
N62   3    0.199663    0.010263    0.635229    11.00000    0.02755    0.02904 =
         0.02009    0.00116    0.00196    0.02042
N71   3    0.332091    0.070859    0.502302    11.00000    0.01924    0.03078 =
         0.01677   -0.00043   -0.00303    0.01418
N72   3    0.324724    0.099122    0.477114    11.00000    0.02114    0.02086 =
         0.01955    0.00053   -0.00344    0.01386
N81   3    0.313946   -0.007052    0.422887    11.00000    0.02770    0.04489 =
         0.02364    0.00700    0.00522    0.02921
N82   3    0.290562   -0.021583    0.375145    11.00000    0.02796    0.02653 =
         0.02142    0.00161    0.00673    0.02081
C13   1    0.036388   -0.045014    0.305296    11.00000    0.02385    0.01358 =
         0.03626   -0.00166   -0.01072    0.00263
AFIX  43
H13   5    0.017933   -0.064250    0.332209    11.00000   -1.20000
AFIX   0
C13S  1    0.451429    0.143588    0.351773    11.00000    0.04156    0.08216 =
         0.20409    0.02851    0.02422    0.03501
AFIX  43
H13S  5    0.465356    0.171588    0.343269    11.00000   -1.20000
AFIX   0
C14   1    0.028017   -0.041155    0.247332    11.00000    0.03084    0.03244 =
         0.04007   -0.00727   -0.01750    0.01143
AFIX  43
H14   5    0.003455   -0.057033    0.226930    11.00000   -1.20000
AFIX   0
C14S  1    0.411767    0.120356    0.370294    11.00000    0.07852    0.08568 =
         0.12478    0.01000    0.00534    0.05042
AFIX  43
H14S  5    0.392964    0.128721    0.379908    11.00000   -1.20000
AFIX   0
C15   1    0.063690   -0.008751    0.225550    11.00000    0.03163    0.02430 =
         0.02563   -0.00083   -0.00910    0.00767
AFIX  43
H15   5    0.067572    0.001679    0.186976    11.00000   -1.20000
AFIX   0
C15S  1    0.406741    0.083130    0.371168    11.00000    0.07852    0.08568 =
         0.12478    0.01000    0.00534    0.05042
AFIX  43
H15S  5    0.381376    0.059783    0.378176    11.00000   -1.20000
AFIX   0
C23   1    0.235556    0.044264    0.199296    11.00000    0.03547    0.04108 =
         0.02212    0.01249    0.00670    0.02384
AFIX  43
H23   5    0.254890    0.035683    0.200427    11.00000   -1.20000
AFIX   0
C23S  1    0.474952    0.239403    0.453796    10.50000    0.08629    0.07022 =
         0.05004    0.02076    0.01688    0.05837
AFIX  43
H23S  5    0.467786    0.257702    0.437349    10.50000   -1.20000
AFIX   0
C24   1    0.231274    0.066986    0.154206    11.00000    0.03889    0.05567 =
         0.01678    0.01191    0.00808    0.02164
AFIX  43
H24   5    0.246926    0.076717    0.119620    11.00000   -1.20000
AFIX   0
C24S  1    0.455793    0.201808    0.441667    10.50000    0.09030    0.08508 =
         0.08053    0.01270   -0.05788    0.01611
AFIX  43
H24S  5    0.433620    0.188192    0.415793    10.50000   -1.20000
AFIX   0
C25   1    0.199833    0.072007    0.170886    11.00000    0.03890    0.03210 =
         0.01720    0.00568   -0.00045    0.02202
AFIX  43
H25   5    0.189883    0.086374    0.149344    11.00000   -1.20000
AFIX   0
C25S  1    0.473856    0.185554    0.473567    10.50000    0.06493    0.02189 =
         0.06385    0.01795   -0.00488    0.01472
AFIX  43
H25S  5    0.465296    0.157772    0.477839    10.50000   -1.20000
AFIX   0
C33   1    0.282240    0.217406    0.360585    11.00000    0.02219    0.01223 =
         0.03927    0.00074   -0.00617    0.00358
AFIX  43
H33   5    0.310224    0.227169    0.355673    11.00000   -1.20000
AFIX   0
C34   1    0.263862    0.240659    0.364228    11.00000    0.02676    0.00979 =
         0.06055   -0.00207   -0.00277    0.00328
AFIX  43
H34   5    0.276687    0.269168    0.361741    11.00000   -1.20000
AFIX   0
C35   1    0.224148    0.214760    0.372007    11.00000    0.02634    0.01173 =
         0.04193   -0.00393    0.00126    0.00709
AFIX  43
H35   5    0.204046    0.222118    0.376650    11.00000   -1.20000
AFIX   0
C43   1    0.123468    0.093153    0.538111    11.00000    0.03309    0.04598 =
         0.03301    0.01082    0.00710    0.03424
AFIX  43
H43   5    0.123040    0.082000    0.575336    11.00000   -1.20000
AFIX   0
C44   1    0.097904    0.106598    0.521101    11.00000    0.04219    0.05989 =
         0.03317    0.00319    0.01058    0.04020
AFIX  43
H44   5    0.077322    0.107067    0.543594    11.00000   -1.20000
AFIX   0
C45   1    0.108868    0.119560    0.462954    11.00000    0.02255    0.03079 =
         0.03804   -0.00567   -0.00007    0.01911
AFIX  43
H45   5    0.096265    0.129889    0.438220    11.00000   -1.20000
AFIX   0
C53   1    0.118457   -0.116650    0.445011    11.00000    0.03336    0.01309 =
         0.04283   -0.00188   -0.00875    0.00998
AFIX  43
H53   5    0.099333   -0.120938    0.415442    11.00000   -1.20000
AFIX   0
C54   1    0.128602   -0.145114    0.464739    11.00000    0.04327    0.01510 =
         0.06352   -0.00557   -0.01233    0.01575
AFIX  43
H54   5    0.118274   -0.171856    0.450908    11.00000   -1.20000
AFIX   0
C55   1    0.156407   -0.126368    0.507953    11.00000    0.03081    0.02520 =
         0.04265    0.01073    0.00145    0.01989
AFIX  43
H55   5    0.168678   -0.138227    0.530239    11.00000   -1.20000
AFIX   0
C63   1    0.194255    0.015216    0.691523    11.00000    0.02490    0.04097 =
         0.01688    0.00021    0.00630    0.02020
AFIX  43
H63   5    0.195807    0.038810    0.707531    11.00000   -1.20000
AFIX   0
C64   1    0.186123   -0.018498    0.723237    11.00000    0.03198    0.03824 =
         0.01505    0.00487    0.00526    0.01435
AFIX  43
H64   5    0.180947   -0.022899    0.763934    11.00000   -1.20000
AFIX   0
C65   1    0.187185   -0.044267    0.682824    11.00000    0.04087    0.03941 =
         0.01844    0.01091    0.00747    0.02390
AFIX  43
H65   5    0.183146   -0.070322    0.691001    11.00000   -1.20000
AFIX   0
C73   1    0.351840    0.134602    0.497637    11.00000    0.03886    0.03455 =
         0.04361   -0.00323   -0.01933    0.02003
AFIX  43
H73   5    0.353095    0.159408    0.488768    11.00000   -1.20000
AFIX   0
C74   1    0.378470    0.130167    0.534444    11.00000    0.02772    0.04134 =
         0.04146   -0.00574   -0.01905    0.00508
AFIX  43
H74   5    0.401712    0.150873    0.553251    11.00000   -1.20000
AFIX   0
C75   1    0.363801    0.089573    0.537491    11.00000    0.02915    0.04073 =
         0.03137    0.00818   -0.00401    0.01624
AFIX  43
H75   5    0.374540    0.076765    0.560993    11.00000   -1.20000
AFIX   0
C83   1    0.306762   -0.037764    0.339172    11.00000    0.05743    0.05470 =
         0.01842    0.00249    0.01107    0.04296
AFIX  43
H83   5    0.296142   -0.049649    0.302250    11.00000   -1.20000
AFIX   0
C84   1    0.341484   -0.034316    0.364635    11.00000    0.07110    0.09431 =
         0.02791   -0.01158   -0.00324    0.07286
AFIX  43
H84   5    0.358649   -0.043511    0.349955    11.00000   -1.20000
AFIX   0
C85   1    0.344806   -0.014190    0.416599    11.00000    0.04575    0.07803 =
         0.02381    0.00844    0.00541    0.05101
AFIX  43
H85   5    0.365992   -0.006476    0.444062    11.00000   -1.20000
AFIX   0
HKLF 4

REM  mo_CCU_JUL167_1_m4_0m in R3c #161
REM R1 =  0.0514 for   22592 Fo > 4sig(Fo)  and  0.0580 for all   24695 data
REM    918 parameters refined using     19 restraints

END

WGHT      0.0496    636.6285

REM Highest difference peak  2.197,  deepest hole -2.089,  1-sigma level  0.292
Q1    1   0.3006  0.0258  0.5108  11.00000  0.05    2.20
Q2    1   0.2113  0.1120  0.5116  11.00000  0.05    2.05
Q3    1   0.2740  0.1323  0.3312  11.00000  0.05    1.95
Q4    1   0.2945  0.1073  0.4212  11.00000  0.05    1.91
Q5    1   0.2318 -0.0195  0.5623  11.00000  0.05    1.81
Q6    1   0.2443 -0.0070  0.3982  11.00000  0.05    1.78
Q7    1   0.3078  0.0236  0.4896  11.00000  0.05    1.76
Q8    1   0.1564  0.1315  0.3395  11.00000  0.05    1.71
Q9    1   0.1835  0.1243  0.3411  11.00000  0.05    1.71
Q10   1   0.2618  0.1424  0.3730  11.00000  0.05    1.62
;
_shelx_res_checksum              88399

_shelx_hkl_file                  
;
   0   3   0 1.42911 0.58187   3
  -4   2   0 3097.41 190.480   4
   2   2   0 3039.80 193.598   4
  -2  -2   0 3280.92 200.877   5
  -2   4   0 3065.91 198.090   5
  -2  -2   0 3160.34 199.685   4
  -5   1   0 347.714 22.6492   2
   4  -5   0 367.930 22.1373   3
  -5   1   0 331.495 21.9788   3
   1   4   0 358.324 22.7483   2
   1   4   0 338.918 22.7109   3
   4  -5   0 355.004 21.8013   2
  -1  -4   0 347.735 22.4994   1
  -1  -4   0 337.415 22.4331   3
  -4   5   0 391.071 21.9586   3
   5  -1   0 313.066 21.6662   3
  -1  -4   0 342.036 22.3297   2
   5  -1   0 337.898 22.4951   2
  -4   5   0 347.129 21.5002   2
   4   1   0 346.339 22.7610   2
   4   1   0 328.367 22.3552   3
   1  -5   0 336.450 22.4389   1
   1  -5   0 376.842 22.3272   2
   1  -5   0 362.494 22.7037   3
  -5   4   0 349.185 22.0889   2
  -1   5   0 368.264 22.2401   2
  -4  -1   0 338.705 22.7227   2
   5  -4   0 344.396 22.0095   2
  -4  -1   0 331.339 22.3023   3
  -1   5   0 360.395 22.6691   3
   3   3   0 9.90928 2.29956   1
   3  -6   0 10.0956 1.29723   2
   3  -6   0 7.17095 1.62070   3
   3   3   0 8.69260 2.02286   2
  -6   3   0 8.13628 1.65379   2
   3   3   0 5.92406 1.51448   3
   3  -6   0 8.18046 1.55533   1
  -3   6   0 7.90582 1.47441   1
  -3  -3   0 4.94610 1.88290   1
  -3  -3   0 7.12568 1.89602   2
  -3   6   0 7.01744 1.16732   2
  -3  -3   0 9.18479 2.07938   3
   6   0   0 510.629 34.4097   2
  -6   6   0 523.670 33.3986   2
  -6   6   0 579.558 33.4743   3
   0  -6   0 539.889 34.4972   3
   0  -6   0 529.939 34.3412   1
   0  -6   0 534.274 34.1281   2
   6   0   0 521.572 34.3224   3
   6  -6   0 519.446 33.1735   2
  -6   0   0 508.707 34.2203   2
  -6   0   0 526.428 33.5897   3
   6  -6   0 549.736 33.1152   3
   0   6   0 550.766 34.0699   2
   2   5   0 188.560 13.2673   2
  -7   2   0 172.981 12.1720   3
   2   5   0 188.552 13.6783   1
   5  -7   0 180.366 12.0197   2
  -7   2   0 177.674 13.0951   2
   5  -7   0 200.689 12.7936   1
   5  -7   0 214.334 12.7826   3
  -2  -5   0 186.136 12.7899   3
   7  -2   0 179.130 12.5515   2
  -2  -5   0 183.925 12.9519   1
  -2  -5   0 179.207 12.6482   2
  -5   7   0 181.637 11.4187   2
   7  -2   0 162.483 11.5614   3
  -7   5   0 179.286 12.2764   2
   5   2   0 185.620 13.7934   1
   5   2   0 171.852 12.9792   2
   2  -7   0 180.615 12.6029   1
   5   2   0 171.456 12.6371   3
   2  -7   0 198.711 12.9770   3
   2  -7   0 191.975 12.3400   2
  -2   7   0 224.800 13.3997   2
  -2   7   0 220.349 14.0525   3
  -5  -2   0 197.123 14.1148   2
  -5  -2   0 170.467 13.4938   3
  -2   7   0 202.760 14.2596   1
   7  -5   0 178.483 13.5853   2
   1   7   0 128.638 9.69514   3
  -8   1   0 116.545 9.47070   2
   7  -8   0 122.509 8.41962   3
  -8   1   0 112.651 8.50010   3
   1   7   0 129.570 9.39373   2
   7  -8   0 115.595 8.10167   2
  -7   8   0 119.675 8.52661   2
  -7   8   0 141.372 9.07753   3
   8  -1   0 112.932 9.42174   3
   8  -1   0 120.945 9.86962   2
  -1  -7   0 131.573 10.0660   3
  -1  -7   0 139.726 10.1830   1
  -1  -7   0 127.723 9.76120   2
   4  -8   0 415.761 24.6675   2
   4   4   0 381.990 26.2975   1
   4   4   0 372.518 25.5739   3
   4  -8   0 407.055 25.3970   3
   4  -8   0 394.829 25.1967   1
  -8   4   0 399.256 24.0906   3
  -8   4   0 355.313 25.1619   2
   4   4   0 366.602 25.7427   2
   8  -4   0 361.523 22.8881   3
  -4   8   0 406.559 23.9687   1
  -4  -4   0 336.458 24.3415   3
  -4   8   0 407.823 24.4476   3
   8  -4   0 353.088 24.0682   2
  -4  -4   0 330.539 24.5221   2
  -4  -4   0 391.543 25.3427   1
   1  -8   0 130.039 9.05753   2
   1  -8   0 111.647 9.35920   3
   7   1   0 120.552 8.98285   3
   7   1   0 110.123 9.45057   2
   1  -8   0 115.710 9.26393   1
  -8   7   0 127.524 8.49228   2
   8  -7   0 111.069 8.67166   2
  -7  -1   0 127.011 9.96760   2
  -1   8   0 118.371 9.14540   2
   8  -7   0 133.903 8.19246   3
  -7  -1   0 125.184 9.25826   3
   8  -7   0 125.140 8.16964   3
  -1   8   0 120.968 9.73456   3
   6  -9   0 98.2312 6.54643   2
   3   6   0 94.8565 8.09475   3
  -9   3   0 98.8575 7.93824   2
   3   6   0 101.207 8.18057   2
   6  -9   0 96.4154 7.36784   3
   6  -9   0 107.190 7.55574   1
  -9   3   0 82.1611 6.55052   3
   3   6   0 95.7545 8.35906   1
  -3  -6   0 83.6496 8.25076   1
  -3  -6   0 91.1390 8.14091   3
   9  -3   0 90.7865 6.81635   3
  -6   9   0 106.503 7.76175   3
   9  -3   0 101.650 8.09574   2
  -6   9   0 104.692 6.77534   2
  -3  -6   0 108.189 8.43527   2
   3  -9   0 111.724 7.65270   2
   6   3   0 91.8562 8.04564   3
   6   3   0 91.5789 8.42630   2
   6   3   0 124.597 9.83768   1
   3  -9   0 111.494 8.45416   3
  -9   6   0 92.2462 7.62333   2
   3  -9   0 98.8393 7.95534   1
  -6  -3   0 95.6221 7.96141   3
   9  -6   0 92.9055 7.40505   2
  -3   9   0 99.8574 8.12555   3
  -3   9   0 95.5186 7.46761   1
  -3   9   0 114.810 8.04696   2
  -6  -3   0 86.1049 8.18808   2
   9   0   0 1982.48 123.720   2
 -10   2   0 258.084 18.2941   3
   2   8   0 271.440 19.7889   3
   8 -10   0 316.012 18.7345   3
   2   8   0 280.997 19.5796   2
 -10   2   0 270.203 19.6179   2
   8 -10   0 305.532 19.0956   1
   8 -10   0 263.238 17.9228   2
  10  -2   0 267.374 18.4502   2
  -2  -8   0 276.616 18.7098   3
  -8  10   0 254.787 16.6393   2
  10  -2   0 252.398 17.1161   3
  -2  -8   0 242.568 18.1635   2
  -2  -8   0 265.211 18.7312   1
   5 -10   0 3.59954 1.18477   2
   5 -10   0 4.59717 1.62622   1
   5   5   0 4.73688 2.04261   3
   5 -10   0 2.04914 0.94963   2
   5   5   0 2.70874 1.56216   1
 -10   5   0 1.82823 1.36188   2
 -10   5   0 2.31235 0.60903   3
   5   5   0 2.04283 1.62731   2
   5 -10   0 3.65996 1.52708   3
  -5  -5   0 0.78085 1.76437   1
  -5  -5   0 0.30598 1.40395   2
  -5  10   0 2.39059 1.23376   1
  -5  10   0 2.18747 1.47351   3
  -5  -5   0 2.37772 1.63017   3
  10  -5   0 4.52445 1.69813   2
  10  -5   0 1.71674 0.62974   3
   8   2   0 230.652 18.2819   2
   2 -10   0 272.629 18.2206   1
   2 -10   0 253.368 17.5529   2
   8   2   0 261.093 19.6673   1
 -10   8   0 252.996 17.2279   2
   8   2   0 267.338 17.9519   3
   2 -10   0 271.464 18.4667   3
  -2  10   0 301.814 19.4964   2
  -8  -2   0 270.788 20.4063   2
  10  -8   0 304.754 18.0612   3
  -2  10   0 315.730 20.5074   3
  10  -8   0 268.126 19.0006   2
  10  -8   0 299.542 18.0797   3
  -8  -2   0 259.195 19.5776   3
  -2  10   0 273.610 19.5732   1
  10 -11   0 958.516 57.2620   3
  10 -11   0 879.180 57.4766   2
 -11   1   0 869.862 57.5739   3
   1  10   0 1011.37 59.4471   3
 -11   1   0 899.359 58.9893   2
   1  10   0 881.675 58.4431   2
  -1 -10   0 864.802 57.7665   1
  -1 -10   0 879.924 57.2733   2
  11  -1   0 856.449 56.4002   3
 -10  11   0 909.423 55.7669   2
  11  -1   0 844.696 57.5701   2
  -1 -10   0 877.966 58.1610   3
 -10  11   0 1014.34 56.4212   3
 -11   4   0 140.920 10.0264   3
   4   7   0 146.449 11.8485   2
   4   7   0 171.448 12.2755   3
   7 -11   0 160.368 10.2909   2
 -11   4   0 128.050 11.3861   2
   7 -11   0 163.457 11.2887   1
   4   7   0 153.834 12.3902   1
   7 -11   0 170.214 11.3227   3
   7 -11   0 137.656 9.98505   2
  -4  -7   0 164.677 12.0315   2
  -4  -7   0 145.576 11.7234   3
  -4  -7   0 141.538 12.0821   1
  11  -4   0 143.692 9.89433   3
  11  -4   0 142.639 11.3507   2
   7   4   0 166.708 13.6057   1
   7   4   0 152.697 12.0424   3
   4 -11   0 176.440 11.3366   2
   7   4   0 136.564 12.1932   2
   4 -11   0 174.560 12.3104   3
   4 -11   0 163.100 11.8984   1
 -11   7   0 138.345 11.3344   2
  -7  -4   0 140.527 12.3033   2
  -4  11   0 155.721 11.3203   1
  -4  11   0 174.436 11.1901   2
  -7  -4   0 140.162 11.8450   3
  -4  11   0 179.397 12.4078   3
  11  -7   0 144.635 11.2991   2
  10   1   0 881.345 56.4897   3
 -11  10   0 869.697 55.7007   2
  10   1   0 926.204 57.6011   2
   1 -11   0 890.683 56.6203   2
   1 -11   0 877.282 57.1767   1
   1 -11   0 895.215 57.3883   3
  11 -10   0 869.413 57.3681   2
 -10  -1   0 915.391 58.2110   3
  -1  11   0 931.707 58.3194   2
 -10  -1   0 872.243 59.5657   2
  11 -10   0 960.491 56.8349   3
  -1  11   0 951.796 59.3164   3
  11 -10   0 912.103 56.8173   3
   3   9   0 88.2441 8.77359   2
   9 -12   0 96.2302 8.28781   1
   9 -12   0 105.459 8.08300   3
   3   9   0 124.445 9.87122   1
 -12   3   0 116.109 9.39812   2
 -12   3   0 101.024 7.60397   3
   9 -12   0 98.8979 7.18713   2
  12  -3   0 98.5476 7.92538   3
  -9  12   0 115.534 8.70534   3
  -3  -9   0 124.315 10.2203   1
  12  -3   0 109.591 9.41605   2
  -9  12   0 99.6788 7.49178   2
  -3  -9   0 131.413 13.4339   3
  -3  -9   0 106.653 9.41765   2
   6 -12   0 65.1676 5.30999   2
   6 -12   0 63.5478 6.08961   1
 -12   6   0 66.0972 4.43042   3
   6   6   0 66.4956 6.70167   3
   6   6   0 70.5751 7.62747   1
   6   6   0 59.0810 6.63617   2
   6 -12   0 67.4182 5.16152   2
   6 -12   0 65.0334 6.21720   3
 -12   6   0 62.1840 6.14854   2
  12  -6   0 63.3657 4.43896   3
  -6  12   0 70.3067 5.82223   1
  -6  -6   0 62.8709 6.83997   2
  -6  -6   0 64.9248 6.67824   3
  -6  12   0 66.9614 6.34195   3
  12  -6   0 58.1079 6.00652   2
  -6  -6   0 60.8503 7.18330   1
   3 -12   0 106.372 8.42721   2
   9   3   0 104.499 10.5772   1
   3 -12   0 101.083 9.20655   3
   3 -12   0 96.5684 8.91274   1
 -12   9   0 119.446 8.47920   2
   9   3   0 108.338 9.04865   3
   9   3   0 109.412 9.72023   2
  -9  -3   0 111.367 8.89871   3
  -9  -3   0 98.3013 12.4249   2
  -3  12   0 90.7063 8.11701   1
  12  -9   0 108.196 8.07649   2
  -3  12   0 104.914 8.10398   2
  -3  12   0 86.8054 8.71803   3
   0 -12   0 449.268 29.8251   2
   0 -12   0 500.170 30.9962   3
   0 -12   0 425.456 30.4336   1
  12   0   0 413.815 30.2799   2
  12   0   0 423.258 29.2000   3
 -12  12   0 444.685 28.4365   2
 -12   0   0 409.315 28.5293   3
   0  12   0 428.543 29.1926   2
   0  12   0 501.083 30.5484   3
  12 -12   0 429.439 29.0886   3
  12 -12   0 463.377 27.6916   3
  12 -12   0 422.247 27.8144   2
   0  12   0 368.011 30.4657   1
 -12   0   0 429.468 30.0444   2
  11 -13   0 222.202 14.9331   3
 -13   2   0 199.380 16.3694   2
  11 -13   0 238.875 15.8562   1
   2  11   0 211.610 16.6541   3
   2  11   0 215.293 16.2128   2
 -13   2   0 202.920 14.8737   3
  -2 -11   0 223.730 16.3278   2
  -2 -11   0 209.278 16.7396   1
  -2 -11   0 198.776 16.4709   3
  13  -2   0 202.828 16.2618   2
  13  -2   0 195.808 14.8824   3
 -11  13   0 213.816 14.2366   2
 -11  13   0 254.244 15.4372   3
 -13   5   0 786.823 52.6648   3
   5   8   0 787.522 54.9964   3
   8 -13   0 874.326 54.2295   3
   8 -13   0 956.288 53.1403   2
   8 -13   0 860.774 52.8024   2
   8 -13   0 878.744 54.2875   1
   5   8   0 840.068 55.1441   2
 -13   5   0 837.777 54.7232   2
   5   8   0 807.977 55.6138   1
  -5  -8   0 797.075 58.6057   1
  13  -5   0 748.149 50.1364   3
  -8  13   0 921.592 52.1287   3
  -5  -8   0 850.503 52.9097   2
  13  -5   0 757.055 51.9510   2
  -5  -8   0 777.640 52.6027   3
 -13   8   0 769.493 52.7878   2
   5 -13   0 823.522 53.5147   3
   8   5   0 840.892 55.3707   1
   8   5   0 804.904 54.0801   2
   8   5   0 802.360 53.5842   3
   5 -13   0 853.687 53.3221   1
   5 -13   0 905.827 52.4981   2
  -8  -5   0 859.697 57.7480   2
  -5  13   0 984.796 55.9460   2
  13  -8   0 821.147 56.2665   2
  -5  13   0 908.456 57.2836   3
  -5  13   0 875.222 56.4244   1
  -8  -5   0 861.832 57.1422   3
   2 -13   0 219.410 15.5671   2
  11   2   0 229.966 18.1864   1
  11   2   0 200.106 15.5572   3
 -13  11   0 202.429 14.7556   2
   2 -13   0 212.358 16.3986   3
  11   2   0 213.894 16.5894   2
   2 -13   0 229.570 16.4091   1
  -2  13   0 231.201 16.8957   3
  -2  13   0 237.354 15.8536   2
 -11  -2   0 198.397 15.6938   3
  13 -11   0 208.072 13.8705   3
  -2  13   0 216.639 15.9098   1
 -11  -2   0 223.117 17.0368   2
  13 -11   0 224.115 13.9775   3
  13 -11   0 203.861 14.9665   2
 -14   1   0 74.2786 8.33673   2
   1  13   0 99.1349 8.33264   2
  13 -14   0 82.9902 6.55226   3
  13 -14   0 78.0536 6.27306   2
   1  13   0 76.3843 8.34179   3
 -14   1   0 72.9448 6.94635   3
  14  -1   0 84.9133 8.49889   2
  -1 -13   0 70.5293 8.19063   1
  14  -1   0 76.7579 7.04952   3
 -13  14   0 82.6928 6.28771   2
  -1 -13   0 76.8789 7.74681   2
  -1 -13   0 79.3254 8.44318   3
 -14   4   0 346.372 26.0757   2
   4  10   0 350.644 26.6106   1
   4  10   0 359.309 26.2089   2
  10 -14   0 416.973 25.6330   1
  10 -14   0 382.042 23.9102   2
   4  10   0 353.180 26.3934   3
 -14   4   0 347.388 24.1709   3
  10 -14   0 430.742 25.4088   3
  14  -4   0 330.414 23.6497   3
  14  -4   0 355.968 25.5443   2
 -10  14   0 398.272 23.4191   2
  -4 -10   0 347.825 26.2677   1
  -4 -10   0 366.146 27.2723   2
  -4 -10   0 388.088 26.2444   3
   7 -14   0 22.6636 2.62300   2
 -14   7   0 17.8366 3.91007   2
   7   7   0 11.6189 2.96841   3
   7 -14   0 19.3425 2.47104   2
   7   7   0 32.0151 6.46677   1
   7 -14   0 21.2969 3.53837   3
   7   7   0 23.4311 4.73497   2
 -14   7   0 14.8437 1.52864   3
   7 -14   0 18.3315 3.29816   1
  14  -7   0 18.5037 3.69531   2
  -7  14   0 20.3702 2.98777   1
  -7  -7   0 26.0606 5.24960   2
  -7  14   0 22.4154 3.78037   3
  -7  -7   0 15.3761 4.46279   1
  -7  -7   0 23.8512 4.69461   3
  14  -7   0 17.7900 1.74961   3
   4 -14   0 434.217 25.4327   2
 -14  10   0 329.829 24.9187   2
  10   4   0 366.643 28.0145   1
   4 -14   0 411.174 26.2530   1
   4 -14   0 437.964 26.8282   3
  10   4   0 319.715 26.2460   2
  10   4   0 340.963 25.7968   3
  -4  14   0 430.215 26.0189   2
 -10  -4   0 363.666 26.7487   3
  -4  14   0 444.724 27.6671   3
  14 -10   0 338.157 25.6545   2
 -10  -4   0 372.066 27.5768   2
   1 -14   0 80.2728 7.48473   2
  13   1   0 74.8747 7.22740   3
   1 -14   0 65.2713 7.85003   3
   1 -14   0 67.2518 7.74925   1
 -14  13   0 82.8078 6.46179   2
  13   1   0 86.4003 8.45870   2
  14 -13   0 93.5065 7.21862   2
  14 -13   0 93.5709 6.57643   3
  14 -13   0 83.2519 6.38455   3
  -1  14   0 102.172 9.32502   3
  -1  14   0 87.7788 8.36190   1
  -1  14   0 87.2934 8.09487   2
 -13  -1   0 96.7789 9.38058   2
 -13  -1   0 71.6825 7.63101   3
   3  12   0 603.965 42.8326   2
 -15   3   0 629.742 41.2144   3
  12 -15   0 658.331 42.1963   1
   3  12   0 648.639 44.2345   1
  12 -15   0 704.921 41.6628   3
  12 -15   0 664.605 41.1893   2
   3  12   0 609.122 43.3877   3
 -15   3   0 619.900 43.2376   2
 -12  15   0 642.698 38.8182   2
  15  -3   0 600.413 41.3510   2
  -3 -12   0 634.724 41.4314   2
  -3 -12   0 624.099 41.8629   3
  15  -3   0 588.760 39.5253   3
  -3 -12   0 598.599 41.9799   1
   6   9   0 101.652 9.34767   3
 -15   6   0 87.4301 6.58877   3
   9 -15   0 108.364 7.18542   2
   9 -15   0 90.6661 8.21983   1
   9 -15   0 86.5504 7.18094   2
 -15   6   0 88.4277 9.07408   2
   6   9   0 114.952 10.3096   1
   9 -15   0 86.9572 8.13293   3
   6   9   0 85.8956 8.94458   2
  15  -6   0 84.6667 6.77542   3
  15  -6   0 96.7688 8.82266   2
  -9  15   0 105.325 8.77015   3
  -6  -9   0 96.2081 9.34233   3
  -6  -9   0 108.276 9.79032   2
  -6  -9   0 95.2363 9.87673   1
 -15   9   0 108.700 8.84995   2
   9   6   0 99.5667 9.29943   3
   6 -15   0 95.3295 9.09867   3
   9   6   0 91.0713 9.48370   2
   6 -15   0 103.054 8.96541   1
   6 -15   0 104.202 8.04429   2
   9   6   0 96.0541 10.5442   1
  -9  -6   0 94.4796 9.57430   2
  -6  15   0 104.410 8.20106   1
  -6  15   0 95.8533 8.98655   3
  -6  15   0 98.8804 7.61852   2
  -9  -6   0 89.6580 8.99512   3
  15  -9   0 84.3552 8.13051   2
 -15  12   0 585.398 40.5263   2
   3 -15   0 690.877 42.8046   3
  12   3   0 627.395 41.7418   3
   3 -15   0 654.712 41.2931   2
  12   3   0 630.050 44.3400   1
   3 -15   0 646.247 42.2947   1
  12   3   0 588.880 42.4113   2
  -3  15   0 683.151 41.5881   2
  15 -12   0 614.313 39.1438   3
 -12  -3   0 586.143 44.8723   3
  15 -12   0 597.035 40.8638   2
  15 -12   0 657.020 39.2034   3
  -3  15   0 730.696 43.3898   3
 -12  -3   0 600.842 42.9975   2
  15 -12   0 613.097 39.1427   3
  -3  15   0 643.958 42.0363   1
   0 -15   0 1175.60 72.7383   3
 -15  15   0 1142.23 69.6914   2
   0 -15   0 1159.04 72.6690   1
  15   0   0 1041.50 70.6594   3
  15   0   0 1046.27 72.1867   2
   0  15   0 1208.19 74.0565   2
 -15   0   0 1153.88 73.2324   3
  15 -15   0 1156.01 71.8086   3
   0  15   0 1154.86 75.5205   3
  15 -15   0 1126.59 72.1627   2
   0  15   0 1138.19 74.2378   1
 -15   0   0 1145.36 75.1117   2
  15 -15   0 1146.47 71.8451   3
   2  14   0 26.3971 4.74349   2
  14 -16   0 35.0345 3.90970   3
  14 -16   0 33.4313 4.61845   1
 -16   2   0 32.9148 5.50203   2
 -16   2   0 28.0995 3.92946   3
  14 -16   0 29.8415 3.26243   2
  -2 -14   0 23.3456 4.50525   2
  16  -2   0 28.8877 5.94066   2
 -14  16   0 27.0590 2.97972   2
  -2 -14   0 32.5045 6.60165   1
  16  -2   0 18.3619 3.50269   3
  -2 -14   0 30.6350 5.32832   3
 -14  16   0 30.6136 3.94020   3
   5  11   0 435.230 31.8533   1
 -16   5   0 379.020 30.6036   2
 -16   5   0 435.066 28.7189   3
  11 -16   0 475.889 30.3680   1
  11 -16   0 452.923 29.4325   2
  11 -16   0 511.223 30.2814   3
   5  11   0 459.203 31.6507   3
  11 -16   0 450.804 28.6424   2
   5  11   0 418.101 31.0811   2
  16  -5   0 376.100 27.7348   2
  -5 -11   0 419.830 28.4778   2
  16  -5   0 377.921 25.7162   3
  -5 -11   0 423.422 28.6893   3
   8 -16   0 218.608 14.5765   2
   8 -16   0 227.574 16.3023   1
   8 -16   0 249.685 15.0904   2
 -16   8   0 203.844 13.5571   3
   8 -16   0 214.157 19.4296   3
   8   8   0 202.938 16.9593   2
   8   8   0 217.384 18.1410   1
   8   8   0 194.782 16.6290   3
  -8  16   0 244.819 16.1577   1
  -8  16   0 240.884 17.2754   3
  -8  -8   0 205.153 17.6175   2
  16  -8   0 193.230 16.4330   2
  -8  -8   0 202.101 17.2419   3
  -8  -8   0 294.873 22.7970   1
   5 -16   0 478.939 29.3859   3
 -16  11   0 377.354 27.4160   2
  11   5   0 369.384 28.3085   3
   5 -16   0 456.482 27.5777   2
   5 -16   0 409.014 28.4491   1
  11   5   0 380.186 29.0732   2
  11   5   0 398.608 30.6289   1
 -11  -5   0 417.395 31.1241   3
  -5  16   0 520.251 32.1731   3
  -5  16   0 480.963 30.0825   2
  -5  16   0 436.210 30.2557   1
 -11  -5   0 427.304 32.0591   2
  16 -11   0 444.514 30.2842   2
   2 -16   0 29.1024 4.95406   1
  14   2   0 26.8183 7.19531   1
   2 -16   0 24.5647 4.21104   2
 -16  14   0 25.1844 3.42739   2
   2 -16   0 30.9222 5.14011   3
  14   2   0 25.5724 4.22409   3
  14   2   0 26.5335 8.21276   2
  16 -14   0 33.4552 3.02660   3
  16 -14   0 29.6723 3.83686   2
  -2  16   0 37.4967 5.01413   1
 -14  -2   0 32.9250 5.03570   3
 -14  -2   0 25.1194 5.81222   2
  -2  16   0 27.6392 4.35477   2
  -2  16   0 31.4835 5.35113   3
  16 -14   0 31.7508 2.83180   3
   1  16   0 38.7266 5.95767   2
  16 -17   0 61.9126 5.13558   3
 -17   1   0 41.8962 5.41396   3
   1  16   0 48.4311 7.01101   3
  16 -17   0 49.2624 4.84166   3
   1  16   0 44.2663 6.38620   1
  16 -17   0 49.3149 6.14167   1
 -17   1   0 56.9551 7.45866   2
  16 -17   0 57.6986 4.95800   2
  17  -1   0 53.8975 7.10198   2
  -1 -16   0 45.7279 6.29453   2
  -1 -16   0 48.1907 7.03517   3
  17  -1   0 48.3106 5.60738   3
  -1 -16   0 49.7558 7.16749   1
 -16  17   0 56.5960 4.86792   2
   4  13   0 1152.73 72.9448   2
 -17   4   0 1062.90 70.4199   3
   4  13   0 1163.90 73.9076   3
  13 -17   0 1110.19 71.7307   1
  13 -17   0 1118.98 69.9258   2
   4  13   0 1110.35 73.3703   1
 -17   4   0 1109.60 73.0460   2
  13 -17   0 1172.26 71.2285   3
 -13  17   0 1278.47 72.7709   3
  -4 -13   0 1156.91 73.9125   2
  -4 -13   0 1117.74 74.1822   3
  -4 -13   0 1083.47 74.5174   1
  17  -4   0 1115.46 73.6720   2
 -13  17   0 1145.54 70.7252   2
  17  -4   0 1064.89 71.4567   3
  10 -17   0 255.129 18.7705   3
 -17   7   0 222.583 17.5651   2
  10 -17   0 258.436 15.8054   2
   7  10   0 200.108 18.5486   1
  10 -17   0 220.503 15.3748   2
   7  10   0 246.428 18.4860   3
 -17   7   0 230.908 15.0830   3
  10 -17   0 225.586 17.0984   1
   7  10   0 214.437 17.9648   2
  17  -7   0 199.380 13.6937   3
  -7 -10   0 181.521 17.1627   1
 -10  17   0 249.428 16.4444   3
  -7 -10   0 203.726 16.8554   2
  17  -7   0 204.747 16.0815   2
  -7 -10   0 198.818 16.6896   3
   7 -17   0 226.062 14.7864   2
  10   7   0 197.613 17.8445   1
   7 -17   0 227.254 16.4539   3
 -17  10   0 179.332 15.6153   2
  10   7   0 208.047 16.8803   2
  10   7   0 204.508 16.3884   3
   7 -17   0 192.394 15.7296   1
 -10  -7   0 234.682 18.3282   3
  17 -10   0 218.949 17.1972   2
  -7  17   0 229.842 16.7781   1
  -7  17   0 244.932 18.3212   3
  -7  17   0 248.790 16.3448   2
 -10  -7   0 224.624 18.7750   2
  13   4   0 1167.15 75.5143   1
   4 -17   0 1167.25 72.9152   1
 -17  13   0 1065.10 71.0396   2
   4 -17   0 1220.14 71.7290   2
  13   4   0 1076.20 73.6124   2
  13   4   0 1008.21 72.0435   3
   4 -17   0 1180.43 73.2245   3
  -4  17   0 1073.19 70.1490   1
 -13  -4   0 1064.64 70.7098   3
  -4  17   0 1126.38 71.7080   3
  -4  17   0 1100.26 69.8675   2
  17 -13   0 1096.46 69.6937   2
 -13  -4   0 1141.49 72.3327   2
  16   1   0 49.4348 5.93838   3
   1 -17   0 64.1122 7.57971   3
   1 -17   0 55.2136 7.16581   1
 -17  16   0 47.0196 4.91221   2
   1 -17   0 49.5009 6.21925   2
  16   1   0 39.9813 6.46059   2
  17 -16   0 46.2128 4.92868   2
  -1  17   0 62.2703 6.86432   1
  17 -16   0 50.8878 4.30542   3
 -16  -1   0 53.9028 6.07450   3
  17 -16   0 47.1745 4.41645   3
 -16  -1   0 37.4880 6.64646   2
  -1  17   0 61.3599 6.57360   2
 -18   3   0 148.129 14.6169   2
 -18   3   0 154.947 12.5761   3
  15 -18   0 208.710 13.0913   3
  15 -18   0 184.751 13.8575   1
  15 -18   0 165.689 11.8581   2
   3  15   0 141.118 13.8426   2
   3  15   0 175.701 15.2083   3
  -3 -15   0 134.583 12.8635   2
  18  -3   0 141.567 11.4986   3
 -15  18   0 160.245 10.5997   2
  18  -3   0 135.933 13.1123   2
  -3 -15   0 159.095 14.0215   3
  -3 -15   0 147.361 14.0843   1
   6  12   0 148.194 13.1008   3
   6  12   0 149.838 13.6163   1
   6  12   0 129.074 12.4087   2
  12 -18   0 151.492 11.5621   3
 -18   6   0 121.398 12.0654   2
  12 -18   0 149.446 10.0335   2
 -18   6   0 130.996 9.90025   3
  12 -18   0 137.396 11.6341   1
  12 -18   0 141.445 10.1451   2
  -6 -12   0 146.983 13.3575   3
 -12  18   0 160.378 12.4191   3
  -6 -12   0 136.166 13.6870   1
  18  -6   0 151.110 12.8589   2
  -6 -12   0 155.446 13.4653   2
  18  -6   0 136.034 10.4217   3
 -18   9   0 64.1516 7.45304   2
   9 -18   0 79.7439 6.15790   2
   9   9   0 70.8481 9.64676   2
   9   9   0 77.8229 9.55344   1
   9   9   0 53.9417 7.60283   3
   9 -18   0 82.1349 8.06915   3
   9 -18   0 85.0840 6.54028   2
   9 -18   0 83.6399 7.95983   1
  -9  -9   0 69.7590 8.43674   3
  -9  18   0 89.1203 7.39940   1
  -9  18   0 92.7496 8.65167   3
  -9  -9   0 61.3080 8.90855   1
  -9  -9   0 71.7182 8.82023   2
  18  -9   0 72.5610 7.76304   2
   6 -18   0 163.333 11.4255   2
  12   6   0 130.147 12.2458   3
   6 -18   0 146.939 12.4048   1
  12   6   0 119.031 12.5610   2
 -18  12   0 135.656 11.5091   2
  12   6   0 150.954 14.6584   1
   6 -18   0 150.281 12.7484   3
  -6  18   0 152.516 13.1015   3
 -12  -6   0 130.645 12.3740   3
  18 -12   0 142.782 11.6788   2
  -6  18   0 136.879 11.4203   1
  -6  18   0 151.415 11.2196   2
 -12  -6   0 154.668 13.8044   2
  15   3   0 149.681 14.3436   2
  15   3   0 152.443 13.3673   3
   3 -18   0 152.276 12.9487   2
  15   3   0 158.333 16.0671   1
   3 -18   0 203.250 15.2558   3
 -18  15   0 148.985 12.1916   2
   3 -18   0 199.200 15.0503   1
  18 -15   0 163.654 10.5720   3
  18 -15   0 148.267 12.2669   2
  -3  18   0 170.060 13.1413   2
  18 -15   0 168.656 10.5341   3
 -15  -3   0 156.720 14.7676   2
  -3  18   0 165.206 13.5064   1
 -15  -3   0 159.613 13.5521   3
   0 -18   0 114.847 10.2151   2
   0 -18   0 109.421 11.1682   1
  18   0   0 83.8240 8.79547   3
   0 -18   0 96.2824 10.6331   3
  18   0   0 101.066 10.7126   2
 -18  18   0 91.3189 7.78388   2
   0  18   0 111.449 10.1784   2
   0  18   0 90.2575 10.3936   3
 -18   0   0 124.412 11.8728   2
  18 -18   0 92.0565 7.59249   3
  18 -18   0 103.297 7.89181   3
   0  18   0 105.926 10.4170   1
  18 -18   0 104.569 8.29557   2
 -18   0   0 90.4224 9.04939   3
  17 -19   0 92.4964 7.48637   3
 -19   2   0 78.2581 7.88484   3
  17 -19   0 78.1631 6.81881   2
  17 -19   0 91.6603 8.85846   1
  17 -19   0 86.2395 7.30872   3
 -19   2   0 80.5960 9.86132   2
   2  17   0 89.4939 9.49486   2
 -17  19   0 81.3583 6.57025   2
  19  -2   0 71.9354 9.17821   2
  19  -2   0 68.0599 7.42098   3
  -2 -17   0 103.112 10.4772   3
  -2 -17   0 75.8071 8.74312   2
  -2 -17   0 84.1671 9.89188   1
  14 -19   0 266.644 20.0151   1
 -19   5   0 254.964 18.4627   3
   5  14   0 270.486 21.5472   3
  14 -19   0 283.760 18.0097   2
   5  14   0 267.075 21.7301   1
  14 -19   0 280.562 19.5753   3
  14 -19   0 270.210 18.0848   2
 -19   5   0 278.685 21.3816   2
   5  14   0 281.620 21.2708   2
  19  -5   0 273.048 21.4574   2
  -5 -14   0 278.062 22.0990   3
  19  -5   0 264.593 19.0657   3
  -5 -14   0 265.409 22.7507   1
 -14  19   0 317.244 20.7431   3
  -5 -14   0 276.423 21.7640   2
   8  11   0 43.1903 6.49104   3
  11 -19   0 56.1743 6.30967   1
   8  11   0 45.1133 7.51767   1
 -19   8   0 42.5127 3.91074   3
  11 -19   0 53.8801 4.43229   2
   8  11   0 30.1088 6.10197   2
  11 -19   0 69.1517 5.08322   2
 -19   8   0 40.9098 6.13452   2
  11 -19   0 60.3228 6.51586   3
  19  -8   0 32.9360 5.56999   2
  -8 -11   0 40.4361 6.56971   3
  -8 -11   0 46.8285 9.31821   1
 -11  19   0 65.4843 6.79693   3
  -8 -11   0 37.2277 6.47006   2
   8 -19   0 55.8121 5.13937   2
 -19  11   0 43.6483 5.87300   2
  11   8   0 36.1864 6.43175   2
   8 -19   0 48.8666 6.38581   1
   8 -19   0 71.1823 7.36912   3
  11   8   0 41.4272 7.73266   1
  11   8   0 45.8341 7.73276   3
   8 -19   0 60.1455 5.48147   2
  19 -11   0 37.9624 5.51884   2
 -11  -8   0 32.8915 6.55790   2
 -11  -8   0 41.2534 6.48234   3
  -8  19   0 63.3403 5.85262   1
  -8  19   0 65.9303 7.28988   3
   5 -19   0 270.675 21.8602   1
  14   5   0 319.658 24.9673   1
  14   5   0 271.331 22.4269   2
  14   5   0 267.034 21.5375   3
 -19  14   0 291.840 20.5819   2
   5 -19   0 292.253 22.2749   3
   5 -19   0 325.141 21.0067   2
  -5  19   0 264.070 19.7953   1
 -14  -5   0 288.195 20.9281   3
 -14  -5   0 257.770 21.7455   2
  -5  19   0 273.623 19.5458   2
  -5  19   0 285.509 21.6329   3
  19 -14   0 270.245 19.6227   2
  17   2   0 64.9867 10.4336   1
 -19  17   0 89.1249 7.30112   2
  17   2   0 63.4787 8.79250   2
  17   2   0 83.3202 8.44338   3
   2 -19   0 86.5783 9.74668   3
   2 -19   0 83.8363 8.44929   2
   2 -19   0 67.5764 9.00236   1
  19 -17   0 96.9362 6.57066   3
  -2  19   0 88.6526 10.1523   3
  -2  19   0 80.7268 9.63786   1
  19 -17   0 85.7589 7.84859   2
 -17  -2   0 72.4124 8.69228   3
  19 -17   0 96.1933 6.56738   3
  -2  19   0 83.7459 8.79071   2
  19 -17   0 94.9165 6.72793   3
 -17  -2   0 76.1820 9.96655   2
   1  19   0 371.643 28.9147   1
  19 -20   0 376.225 26.0273   2
   1  19   0 395.188 28.6353   2
 -20   1   0 395.962 30.0674   2
  19 -20   0 393.826 26.0805   3
  19 -20   0 422.806 28.5983   1
 -20   1   0 378.847 27.3482   3
  19 -20   0 409.769 26.0467   3
  -1 -19   0 359.352 28.7632   1
  -1 -19   0 412.460 29.1796   3
 -19  20   0 374.034 24.7651   2
  20  -1   0 340.490 26.0316   3
  -1 -19   0 390.010 27.6083   2
 -20   4   0 339.309 23.3784   3
  16 -20   0 338.484 24.6560   1
 -20   4   0 374.875 26.5828   2
   4  16   0 342.318 26.3375   3
  16 -20   0 331.342 23.5765   3
  16 -20   0 345.068 22.5217   2
 -16  20   0 375.267 24.1652   3
  -4 -16   0 303.194 25.5408   3
 -16  20   0 333.419 21.9465   2
  20  -4   0 326.147 25.3501   2
  20  -4   0 311.031 22.9254   3
  -4 -16   0 338.091 27.0055   1
  -4 -16   0 367.611 25.8630   2
  13 -20   0 539.906 33.3618   3
 -20   7   0 456.392 33.9422   2
  13 -20   0 493.921 30.9190   2
   7  13   0 456.939 34.5163   3
 -20   7   0 438.961 30.9177   3
   7  13   0 458.794 35.3001   1
  13 -20   0 543.227 31.3192   2
   7  13   0 423.301 33.9965   2
  13 -20   0 523.030 33.5952   1
  -7 -13   0 459.673 31.5951   2
  -7 -13   0 424.069 32.2399   1
  20  -7   0 436.447 32.8128   2
  -7 -13   0 450.676 31.6628   3
  20  -7   0 391.936 27.5675   3
  10 -20   0 8317.84 541.029   5
 -20  10   0 7880.91 527.512   4
  10 -20   0 9407.38 531.467   4
  10  10   0 7975.89 544.674   4
 -10 -10   0 8648.89 566.745   4
  20 -10   0 7853.54 564.930   5
 -10  20   0 8482.15 556.039   5
 -10  20   0 9999.99 554.797   4
  13   7   0 412.494 32.4986   3
   7 -20   0 479.442 32.3626   1
   7 -20   0 515.176 30.8872   2
 -20  13   0 419.181 30.9853   2
   7 -20   0 502.077 32.8547   3
  13   7   0 403.454 32.6693   2
  13   7   0 453.716 34.8575   1
  -7  20   0 528.271 32.6523   2
  -7  20   0 560.981 35.4927   3
 -13  -7   0 492.524 35.6417   2
  -7  20   0 509.806 33.0717   1
 -13  -7   0 420.241 33.9461   3
  20 -13   0 436.107 33.0672   2
   4 -20   0 351.601 25.4326   1
   4 -20   0 356.883 28.1917   2
  16   4   0 302.807 25.1673   2
 -20  16   0 331.174 22.9990   2
   4 -20   0 334.923 25.2446   3
  16   4   0 311.866 24.1145   3
  -4  20   0 347.273 24.4759   2
  -4  20   0 361.206 26.6570   3
  -4  20   0 353.985 24.9503   1
  20 -16   0 316.685 23.8219   2
 -16  -4   0 367.713 25.6274   3
 -16  -4   0 333.368 26.7042   2
  19   1   0 369.980 27.3078   3
  19   1   0 383.651 31.4442   1
   1 -20   0 422.232 29.7419   3
 -20  19   0 365.532 25.6987   2
   1 -20   0 375.217 27.6408   2
   1 -20   0 402.664 29.5718   1
  20 -19   0 383.461 24.7651   3
  20 -19   0 409.967 25.0353   3
  20 -19   0 365.678 25.7580   2
 -19  -1   0 364.853 29.3028   2
 -19  -1   0 359.520 27.0282   3
  -1  20   0 399.818 27.7839   2
 -21   3   0 324.756 23.1758   3
  18 -21   0 329.491 22.8217   3
   3  18   0 327.398 25.2140   2
  18 -21   0 333.552 22.0381   2
  18 -21   0 355.775 24.6345   1
 -21   3   0 327.999 26.0508   2
  18 -21   0 324.319 22.7550   3
  21  -3   0 343.072 27.7792   2
  -3 -18   0 337.297 27.7349   1
 -18  21   0 352.537 23.1763   2
  -3 -18   0 376.220 27.9052   3
  21  -3   0 327.754 24.3972   3
  -3 -18   0 388.372 27.0653   2
  15 -21   0 189.285 14.9075   1
 -21   6   0 164.673 15.5369   2
  15 -21   0 179.884 12.4129   2
   6  15   0 176.727 16.5207   1
  15 -21   0 182.427 12.5632   2
  15 -21   0 204.561 14.4512   3
 -21   6   0 174.264 12.9096   3
   6  15   0 157.502 15.4062   2
   6  15   0 187.778 16.4354   3
  -6 -15   0 180.718 15.9134   3
  21  -6   0 159.746 12.2938   3
  -6 -15   0 156.177 15.9141   1
  21  -6   0 161.115 14.6886   2
  -6 -15   0 186.196 15.6917   2
  12 -21   0 187.617 14.4270   1
 -21   9   0 160.583 11.1219   3
   9  12   0 133.712 14.3546   2
  12 -21   0 191.171 12.1429   2
  12 -21   0 162.998 11.5631   2
 -21   9   0 163.943 14.3983   2
 -21   9   0 156.447 10.9806   3
  12 -21   0 181.984 14.1512   3
   9  12   0 172.582 16.3964   1
   9  12   0 146.929 14.5620   3
  -9 -12   0 148.934 14.5321   2
  -9 -12   0 145.714 14.2618   3
  -9 -12   0 160.113 15.5967   1
  21  -9   0 149.332 17.5378   2
 -21  12   0 157.040 13.9728   2
   9 -21   0 168.131 12.4856   2
   9 -21   0 178.696 14.6780   1
   9 -21   0 191.813 13.0582   2
  12   9   0 159.040 15.3064   2
  12   9   0 152.835 14.7142   3
  12   9   0 160.210 16.7233   1
   9 -21   0 191.962 15.2229   3
 -12  -9   0 161.990 15.0883   3
 -12  -9   0 180.030 16.1927   2
  21 -12   0 151.423 13.9351   2
  -9  21   0 166.825 19.5188   3
  -9  21   0 190.277 13.6086   1
   6 -21   0 189.850 14.3724   2
  15   6   0 163.359 16.5953   2
   6 -21   0 220.713 16.7244   3
   6 -21   0 182.745 15.7983   1
 -21  15   0 179.934 14.2942   2
  15   6   0 173.638 17.6494   1
  15   6   0 171.659 15.3195   3
  -6  21   0 179.397 14.1179   1
  -6  21   0 206.944 16.4115   3
 -15  -6   0 197.221 16.9293   2
 -15  -6   0 175.731 15.2479   3
  21 -15   0 150.800 13.7020   2
  -6  21   0 171.734 13.6834   2
   3 -21   0 338.769 26.2372   1
   3 -21   0 321.305 26.0347   3
   3 -21   0 375.863 24.9444   2
  18   3   0 313.861 24.7496   3
 -21  18   0 330.475 23.3347   2
  18   3   0 358.779 28.9367   1
 -18  -3   0 335.840 26.4060   2
  21 -18   0 311.932 20.5583   3
 -18  -3   0 332.525 24.4350   3
  -3  21   0 336.155 23.9158   2
  -3  21   0 329.133 24.3442   1
  21 -18   0 338.310 20.6719   3
  21 -18   0 324.007 22.8884   2
 -21  21   0 265.509 18.6476   2
  21   0   0 254.663 20.1900   3
  21   0   0 271.275 24.7019   1
   0 -21   0 273.103 22.8578   1
   0 -21   0 254.535 22.3441   3
   0 -21   0 298.533 21.5370   2
  21 -21   0 252.078 17.9217   2
 -21   0   0 259.137 22.0473   2
  21 -21   0 258.969 17.4987   3
 -21   0   0 248.421 19.3430   3
   0  21   0 268.932 26.1453   2
  21 -21   0 233.769 17.1610   3
  21 -21   0 268.083 20.3703   1
   0  21   0 277.806 21.6704   1
  20 -22   0 79.5575 7.11952   3
   2  20   0 74.5576 9.11913   2
   2  20   0 66.8218 12.3771   1
 -22   2   0 67.7467 9.87282   2
  20 -22   0 75.2933 6.71409   2
 -22   2   0 68.4124 7.72122   3
  20 -22   0 96.5569 7.40777   3
  20 -22   0 76.6683 8.76041   1
  22  -2   0 57.0185 6.77282   3
  -2 -20   0 55.6208 9.15181   1
  -2 -20   0 65.3425 8.42387   2
 -20  22   0 59.2557 5.57461   2
  -2 -20   0 70.8430 9.56275   3
   5  17   0 35.6518 7.34675   1
  17 -22   0 46.7310 4.43648   2
  17 -22   0 46.8788 4.38996   2
 -22   5   0 49.7229 7.65138   2
  17 -22   0 37.9076 6.04069   1
   5  17   0 33.5656 6.51349   2
 -22   5   0 48.2367 5.17499   3
  17 -22   0 59.1209 6.47448   3
  -5 -17   0 45.1496 7.64549   3
  -5 -17   0 38.0211 7.35559   1
  -5 -17   0 45.0558 7.16630   2
  22  -5   0 37.6343 6.56229   2
  22  -5   0 41.4233 5.04367   3
  14 -22   0 848.947 55.2925   1
   8  14   0 833.699 57.9571   1
  14 -22   0 895.135 52.8470   2
   8  14   0 771.627 56.2514   2
 -22   8   0 799.577 52.4991   3
 -22   8   0 813.102 56.0927   2
  14 -22   0 868.681 55.0133   3
  14 -22   0 843.313 52.4650   2
  -8 -14   0 884.026 57.3934   2
  22  -8   0 770.164 55.7724   2
  -8 -14   0 798.324 56.8871   3
  -8 -14   0 771.678 57.9166   1
 -14  22   0 952.570 56.1275   3
  11 -22   0 183.696 15.0601   1
  11  11   0 194.936 17.7336   1
  11 -22   0 170.227 12.3413   2
  11 -22   0 189.644 15.1945   3
  11  11   0 150.311 15.3608   2
 -22  11   0 173.943 14.8945   2
  11 -22   0 186.305 12.8536   2
  11  11   0 142.000 14.9212   3
 -11  22   0 179.107 17.5791   3
 -11 -11   0 164.465 16.4495   2
 -11  22   0 196.874 14.2079   1
  22 -11   0 163.484 15.2485   2
 -11 -11   0 186.782 16.4199   3
  14   8   0 810.047 57.5487   1
   8 -22   0 844.815 54.9714   3
   8 -22   0 831.105 54.6102   1
   8 -22   0 840.297 52.6252   2
  14   8   0 744.550 54.4592   3
 -22  14   0 807.910 53.5095   2
  22 -14   0 765.897 53.7147   2
  -8  22   0 800.640 53.1357   1
 -14  -8   0 874.057 56.7717   2
 -14  -8   0 847.481 55.3580   3
  -8  22   0 811.909 52.5808   2
  -8  22   0 830.541 55.5069   3
  17   5   0 23.7440 7.81512   1
   5 -22   0 52.6997 7.56316   1
   5 -22   0 54.1624 6.16251   2
 -22  17   0 45.1042 5.57607   2
  17   5   0 40.8096 6.39028   3
   5 -22   0 64.5294 8.17773   3
  -5  22   0 51.3662 6.12976   2
  -5  22   0 42.5858 6.07136   1
  22 -17   0 40.1564 5.53760   2
 -17  -5   0 47.4797 7.88693   2
 -17  -5   0 56.1579 7.35193   3
  -5  22   0 65.9692 8.55234   3
 -22  20   0 63.3064 6.51540   2
  20   2   0 61.9147 8.85651   3
   2 -22   0 92.7084 10.4888   3
   2 -22   0 51.9080 7.61277   2
  20   2   0 63.5781 11.2781   1
   2 -22   0 84.8017 10.0507   1
  22 -20   0 53.2907 6.58020   2
 -20  -2   0 56.6739 9.23637   2
  22 -20   0 73.6101 5.41066   3
  -2  22   0 79.3621 8.61463   2
 -20  -2   0 67.4262 8.28424   3
  22 -20   0 72.7797 6.96516   3
  -2  22   0 92.4358 9.33598   1
 -23   1   0 285.656 24.3098   2
  22 -23   0 280.908 22.2206   1
   1  22   0 277.728 23.1019   1
  22 -23   0 274.844 19.5977   2
  22 -23   0 293.327 19.5384   3
  22 -23   0 297.939 19.7412   3
 -23   1   0 267.067 21.0633   3
   1  22   0 278.435 22.3986   2
 -22  23   0 277.864 18.9091   2
  23  -1   0 242.620 20.3985   3
  -1 -22   0 252.007 21.6203   2
  -1 -22   0 273.624 23.8584   1
  -1 -22   0 339.689 24.4897   3
  19 -23   0 279.613 19.8944   3
  19 -23   0 303.659 20.6250   3
 -23   4   0 264.340 20.1413   3
  19 -23   0 281.943 21.4967   1
   4  19   0 239.961 21.8537   2
  19 -23   0 289.594 18.7721   2
 -23   4   0 267.028 22.9219   2
 -19  23   0 301.572 18.7960   2
  -4 -19   0 285.879 23.4399   2
  -4 -19   0 273.609 23.3196   3
  23  -4   0 248.177 19.9391   3
  16 -23   0 127.184 12.1056   1
   7  16   0 115.963 12.7826   2
 -23   7   0 126.309 9.96857   3
  16 -23   0 138.298 9.74640   2
  16 -23   0 131.727 9.48404   2
  16 -23   0 150.185 11.7771   3
 -23   7   0 126.881 13.0217   2
   7  16   0 134.002 14.1531   1
  -7 -16   0 120.685 13.3466   2
  -7 -16   0 133.276 13.7517   3
  23  -7   0 127.239 10.2969   3
  -7 -16   0 126.624 14.5869   1
  23  -7   0 126.070 12.8862   2
 -16  23   0 171.529 12.9942   3
 -23  10   0 1712.17 105.821   3
  10  13   0 1697.47 112.588   1
 -23  10   0 1696.52 105.737   3
  13 -23   0 1795.00 106.623   2
  10  13   0 1522.39 112.120   2
 -23  10   0 1587.72 109.725   2
  13 -23   0 1996.88 110.368   1
  23 -10   0 1588.44 104.103   2
 -10 -13   0 1729.76 106.054   2
 -10 -13   0 1724.79 105.629   3
 -10 -13   0 1453.99 106.287   1
  10 -23   0 1859.91 115.981   2
  10 -23   0 2148.61 119.698   3
  13  10   0 1625.68 121.064   1
 -23  13   0 1615.85 117.759   2
  10 -23   0 1901.37 118.948   1
  10 -23   0 2017.91 116.596   2
 -10  23   0 2072.50 110.716   1
 -13 -10   0 1673.34 113.466   2
  23 -13   0 1555.10 111.098   2
 -13 -10   0 1682.03 112.569   3
 -23  16   0 128.306 11.6201   2
   7 -23   0 139.207 11.5163   2
   7 -23   0 141.977 13.3593   1
   7 -23   0 160.466 13.9761   3
  16   7   0 134.189 15.2583   1
  16   7   0 118.103 12.5419   3
 -16  -7   0 132.775 14.0722   2
  23 -16   0 126.472 11.5811   2
  -7  23   0 129.184 11.4379   1
  -7  23   0 142.812 13.6108   3
 -16  -7   0 132.212 12.9570   3
  -7  23   0 138.578 11.2594   2
   4 -23   0 274.375 22.8981   1
   4 -23   0 303.504 23.4769   3
   4 -23   0 305.709 21.4320   2
 -23  19   0 271.247 20.1404   2
  19   4   0 244.872 21.4161   3
  19   4   0 299.608 25.8550   1
 -19  -4   0 309.838 24.4767   2
  23 -19   0 262.542 20.3454   2
 -19  -4   0 263.164 21.7604   3
  -4  23   0 294.596 21.2236   2
  -4  23   0 296.432 21.8362   1
  22   1   0 261.107 22.8397   3
   1 -23   0 255.260 21.3413   2
  22   1   0 308.811 26.6013   1
   1 -23   0 285.067 23.3822   3
   1 -23   0 295.828 23.8603   1
 -23  22   0 257.161 19.0892   2
 -22  -1   0 290.698 24.5163   2
  23 -22   0 295.737 18.9832   3
  23 -22   0 268.601 19.9630   2
 -22  -1   0 293.009 21.8602   3
  23 -22   0 276.365 22.3030   1
  -1  23   0 261.881 21.7779   2
  23 -22   0 283.808 18.7212   3
  -1  23   0 282.308 22.7163   1
  21 -24   0 394.594 27.0581   2
 -24   3   0 410.901 28.5988   3
   3  21   0 444.174 31.2423   2
  21 -24   0 409.417 30.0469   1
  21 -24   0 410.542 27.8996   3
 -24   3   0 417.070 32.1225   2
  21 -24   0 412.433 27.9683   3
 -21  24   0 407.953 26.6876   2
  -3 -21   0 450.269 31.2201   2
  -3 -21   0 407.234 32.5894   1
  -3 -21   0 409.084 31.7032   3
  24  -3   0 372.544 28.3254   3
  18 -24   0 456.757 29.8793   3
  18 -24   0 439.260 27.8097   2
  18 -24   0 395.757 30.4055   1
   6  18   0 401.419 31.6737   2
 -24   6   0 489.921 33.0687   2
   6  18   0 451.546 33.2993   1
 -24   6   0 407.464 28.5316   3
  18 -24   0 434.234 29.7429   3
  18 -24   0 409.750 27.6201   2
  -6 -18   0 424.671 34.1614   1
  24  -6   0 409.840 29.3212   3
  -6 -18   0 442.793 33.3765   3
  -6 -18   0 498.907 33.5403   2
  15 -24   0 563.650 32.4354   2
 -24   9   0 452.802 31.8304   3
  15 -24   0 516.555 35.2910   1
 -24   9   0 474.372 31.9891   3
  15 -24   0 478.739 31.9048   2
 -24   9   0 480.833 35.8272   2
   9  15   0 492.980 37.8359   1
  15 -24   0 565.834 35.1049   3
  -9 -15   0 494.854 33.6541   3
  -9 -15   0 402.545 33.8900   1
  24  -9   0 398.292 31.5787   2
  -9 -15   0 456.151 33.3243   2
  12 -24   0 1908.25 122.949   2
  12 -24   0 2169.39 123.546   2
  12 -24   0 2071.54 126.303   3
 -24  12   0 1862.62 125.955   2
  12  12   0 1954.56 129.357   1
  12 -24   0 1926.90 126.124   1
 -12  24   0 2261.02 124.853   3
  24 -12   0 1777.24 122.936   2
 -12 -12   0 1782.11 124.066   3
 -12 -12   0 1946.00 125.274   2
   9 -24   0 532.809 33.6812   2
  15   9   0 498.687 38.7877   1
 -24  15   0 453.633 34.3831   2
  15   9   0 414.343 36.0391   3
   9 -24   0 507.575 33.1876   2
   9 -24   0 549.786 36.4221   3
   9 -24   0 538.029 36.0938   1
  24 -15   0 451.005 35.3064   2
  -9  24   0 526.165 34.8967   1
 -15  -9   0 492.291 37.0104   3
 -15  -9   0 522.280 38.4651   2
  -9  24   0 601.065 38.1357   3
 -24  18   0 422.548 30.1843   2
  18   6   0 400.384 32.0753   3
   6 -24   0 475.036 30.6881   2
   6 -24   0 461.574 32.9541   3
   6 -24   0 408.689 32.2824   1
  18   6   0 457.137 35.5425   1
  -6  24   0 420.104 30.7722   1
 -18  -6   0 467.912 34.2986   2
  24 -18   0 421.806 30.5935   2
  -6  24   0 460.725 30.6082   2
 -18  -6   0 445.959 32.2860   3
 -24  21   0 395.007 29.3319   2
   3 -24   0 413.108 29.1526   2
   3 -24   0 428.353 31.6258   1
   3 -24   0 431.355 31.4402   3
  21   3   0 408.986 33.8574   1
  21   3   0 345.537 28.8576   3
  -3  24   0 403.030 29.2938   2
  -3  24   0 448.847 30.3502   1
  24 -21   0 378.967 27.9063   2
 -21  -3   0 408.249 29.8626   3
 -21  -3   0 402.342 32.1203   2
  24   0   0 1256.86 84.7277   1
   0 -24   0 1188.13 81.6312   1
   0 -24   0 1289.58 79.5232   2
   0 -24   0 1233.83 81.0186   3
  24   0   0 1082.89 77.8709   3
 -24  24   0 1195.56 75.9199   2
   0  24   0 1186.20 78.8228   1
  24 -24   0 1167.97 75.1161   2
  24 -24   0 1245.09 78.3295   1
   0  24   0 1178.33 77.9942   2
 -24   0   0 1184.31 80.5128   2
  24 -24   0 1223.21 74.4977   3
  24 -24   0 1168.34 74.1634   3
 -24   0   0 1132.33 76.8380   3
  23 -25   0 64.4646 6.49804   2
  23 -25   0 85.5077 9.52679   1
 -25   2   0 66.4104 10.4788   2
  23 -25   0 82.5680 7.12681   3
 -25   2   0 68.2905 7.96658   3
   2  23   0 72.3112 9.46912   2
   2  23   0 60.1398 9.45919   1
  23 -25   0 74.4711 7.01401   3
  -2 -23   0 60.0676 9.62592   3
  -2 -23   0 60.4715 8.86301   2
 -23  25   0 55.4168 5.66926   2
  25  -2   0 58.5229 7.27330   3
  -2 -23   0 54.4670 9.91620   1
  20 -25   0 269.256 21.9685   1
  20 -25   0 282.133 19.0849   2
 -25   5   0 268.341 23.7262   2
  20 -25   0 300.398 20.8916   3
  20 -25   0 312.075 20.9294   3
 -25   5   0 273.833 21.4087   3
  20 -25   0 281.535 19.1897   2
  -5 -20   0 336.553 24.0948   2
  25  -5   0 249.260 19.8547   3
  -5 -20   0 243.569 23.8785   1
  -5 -20   0 306.737 24.1855   3
  17 -25   0 109.286 8.23089   2
   8  17   0 92.9167 12.3990   1
  17 -25   0 101.656 7.92233   2
 -25   8   0 90.9922 11.2994   2
  17 -25   0 132.441 10.8157   3
 -25   8   0 109.278 8.51372   3
  17 -25   0 109.525 10.9563   1
 -17  25   0 145.291 11.9059   3
  -8 -17   0 89.1293 11.6915   2
  -8 -17   0 110.482 12.6526   3
  -8 -17   0 84.5801 12.4795   1
  11  14   0 683.028 51.0086   1
  14 -25   0 686.641 44.7319   2
  14 -25   0 724.702 47.9276   3
  14 -25   0 774.905 45.2568   2
  14 -25   0 720.771 48.2842   1
 -25  11   0 624.702 48.1162   2
 -14  25   0 801.720 48.0921   3
 -11 -14   0 686.992 48.7837   2
 -11 -14   0 635.009 47.9555   3
 -11 -14   0 606.805 49.2273   1
 -25  14   0 690.105 47.8689   2
  11 -25   0 721.982 48.6807   1
  11 -25   0 708.446 48.4857   3
  11 -25   0 723.951 45.8204   2
  14  11   0 676.944 51.3923   1
  11 -25   0 707.732 45.4135   2
 -11  25   0 770.965 49.5400   3
 -11  25   0 765.026 46.4713   1
 -14 -11   0 681.196 49.8832   2
  25 -14   0 648.798 47.4587   2
 -14 -11   0 637.173 48.6759   3
   8 -25   0 106.580 11.7583   3
  17   8   0 104.198 13.7524   1
   8 -25   0 120.210 12.0938   1
   8 -25   0 115.122 11.5467   2
 -25  17   0 96.3214 9.93081   2
 -17  -8   0 112.997 12.7018   2
  -8  25   0 108.028 9.28911   2
  25 -17   0 82.5550 9.44810   2
 -17  -8   0 88.9594 10.8605   3
  -8  25   0 114.431 9.89946   1
 -25  20   0 290.161 20.6033   2
   5 -25   0 283.832 23.5548   1
   5 -25   0 289.627 21.3289   2
  20   5   0 238.683 22.0232   3
  20   5   0 278.955 25.9074   1
   5 -25   0 297.000 23.6410   3
  -5  25   0 292.511 20.9200   2
  25 -20   0 269.930 20.3733   2
 -20  -5   0 299.985 24.4674   2
  -5  25   0 259.411 21.0190   1
 -20  -5   0 258.631 21.7804   3
   2 -25   0 58.3832 8.38177   2
 -25  23   0 62.0677 8.43372   2
   2 -25   0 68.0280 10.3194   1
  23   2   0 54.2264 7.84431   3
   2 -25   0 112.078 11.9157   3
  23   2   0 83.5586 13.4388   1
  -2  25   0 79.7106 9.51347   1
  25 -23   0 64.2105 4.99368   3
 -23  -2   0 74.5324 10.8988   2
 -23  -2   0 60.1956 8.32186   3
  -2  25   0 70.5369 8.62844   2
  25 -23   0 55.5414 6.68321   2
  25 -23   0 66.1707 5.43851   3
  25 -26   0 165.809 12.1090   3
  25 -26   0 160.142 14.9922   1
 -26   1   0 155.195 13.8994   3
   1  25   0 138.485 15.2673   1
  25 -26   0 151.154 12.0196   2
 -26   1   0 147.407 16.8195   2
  25 -26   0 154.880 11.7036   3
  -1 -25   0 139.041 16.1520   3
  26  -1   0 191.411 20.5689   1
  26  -1   0 155.492 14.1298   3
  -1 -25   0 156.958 17.2368   1
  -1 -25   0 160.115 15.3324   2
 -25  26   0 152.443 11.8600   2
   4  22   0 61.5251 11.2196   1
  22 -26   0 68.9246 6.10563   2
 -26   4   0 68.6686 10.6330   2
  22 -26   0 70.5284 7.24862   3
 -26   4   0 70.7782 7.46597   3
  22 -26   0 72.7374 7.30864   3
  22 -26   0 70.9817 8.78129   1
  -4 -22   0 79.2775 10.0828   2
  -4 -22   0 78.3331 11.6058   1
  26  -4   0 59.6266 7.30956   3
 -22  26   0 67.0105 5.93533   2
  -4 -22   0 69.0055 10.4949   3
   7  19   0 272.542 22.9828   1
 -26   7   0 234.952 17.7544   3
  19 -26   0 267.134 19.3161   3
  19 -26   0 258.742 20.3537   1
 -26   7   0 255.721 21.8238   2
  19 -26   0 239.168 16.8209   2
  19 -26   0 258.867 17.0959   2
  19 -26   0 258.034 19.2851   3
  -7 -19   0 236.989 21.9503   1
  -7 -19   0 237.827 20.8899   3
  26  -7   0 205.929 16.4379   3
  -7 -19   0 256.795 20.9237   2
  16 -26   0 264.460 17.2632   2
  16 -26   0 262.243 20.5613   1
  16 -26   0 245.265 19.7384   3
 -26  10   0 236.861 16.8024   3
 -26  10   0 252.610 21.1005   2
 -26  10   0 260.043 16.8379   3
  10  16   0 272.741 23.5183   1
  16 -26   0 251.980 16.9798   2
 -10 -16   0 280.909 22.9402   2
 -16  26   0 255.311 21.0331   3
 -10 -16   0 252.552 22.3165   3
 -10 -16   0 257.234 23.8686   1
  13 -26   0 200.165 16.6495   1
  13 -26   0 176.754 13.1510   2
  13 -26   0 194.101 16.3393   3
 -26  13   0 167.325 15.9743   2
  13 -26   0 186.734 13.5743   2
  13  13   0 197.345 19.2845   1
 -13  26   0 189.616 16.2336   3
 -13 -13   0 156.767 16.1309   3
 -13 -13   0 150.304 16.2920   2
  10 -26   0 283.204 21.6298   1
  10 -26   0 239.848 20.8734   3
  16  10   0 272.349 24.3910   1
  10 -26   0 245.980 18.2427   2
 -26  16   0 269.181 20.3675   2
  10 -26   0 254.080 18.6714   2
 -10  26   0 234.437 18.2209   1
 -16 -10   0 252.634 21.2043   3
 -16 -10   0 272.083 22.4221   2
  26 -16   0 234.293 19.3549   2
  19   7   0 224.707 23.1793   1
   7 -26   0 238.530 20.8584   3
   7 -26   0 250.986 21.2780   1
 -26  19   0 243.661 18.8863   2
   7 -26   0 259.229 18.8872   2
 -19  -7   0 254.815 21.2184   3
  26 -19   0 238.229 19.4530   2
  -7  26   0 274.980 19.4281   2
  -7  26   0 251.810 19.5609   1
 -19  -7   0 255.929 22.8920   2
   4 -26   0 81.3928 9.17444   2
  22   4   0 63.9185 8.79308   3
  22   4   0 72.8954 12.1833   1
   4 -26   0 101.586 11.5176   3
 -26  22   0 71.3329 7.64808   2
   4 -26   0 85.1296 11.1902   1
  -4  26   0 86.8059 10.3739   2
 -22  -4   0 63.5890 8.82036   3
 -22  -4   0 70.4543 10.9091   2
  26 -22   0 60.3558 7.27324   2
  -4  26   0 76.4149 9.02938   1
   1 -26   0 177.326 17.4484   3
 -26  25   0 164.587 12.7244   2
  25   1   0 159.297 19.2787   1
   1 -26   0 153.834 15.1095   2
   1 -26   0 149.166 16.9150   1
  26 -25   0 143.096 10.6640   3
  26 -25   0 160.780 15.2017   1
  26 -25   0 155.203 12.4402   2
  -1  26   0 143.050 14.3091   2
  -1  26   0 158.551 15.3516   1
 -25  -1   0 141.793 13.9794   3
 -25  -1   0 174.272 17.5693   2
  26 -25   0 161.950 11.0613   3
   3  24   0 515.893 35.0025   1
  24 -27   0 420.445 28.7345   2
  24 -27   0 413.454 32.0546   1
 -27   3   0 436.823 34.6494   2
  24 -27   0 425.772 31.3212   3
 -27   3   0 424.503 30.5339   3
  24 -27   0 447.417 29.7622   3
  27  -3   0 394.974 30.0854   3
  -3 -24   0 437.199 33.9937   3
 -24  27   0 437.266 28.0144   2
  -3 -24   0 432.932 32.6397   2
  21 -27   0 96.0681 7.31990   2
 -27   6   0 89.4117 11.8835   2
  21 -27   0 96.1169 9.21530   3
 -27   6   0 88.7505 9.81171   3
  21 -27   0 102.567 10.6698   1
  21 -27   0 97.6098 9.31419   3
  21 -27   0 91.0275 7.38232   2
  -6 -21   0 99.0155 11.5182   2
  27  -6   0 87.9540 8.52679   3
  -6 -21   0 79.6472 12.1484   1
  -6 -21   0 83.7755 11.8452   3
  18 -27   0 66.1379 5.44055   2
  18 -27   0 65.8788 7.66039   3
 -27   9   0 58.0908 5.63858   3
   9  18   0 70.6737 10.4894   1
  18 -27   0 61.7375 5.16627   2
 -27   9   0 75.5507 9.60841   2
 -27   9   0 58.3054 5.54709   3
  18 -27   0 50.9008 7.62778   1
  -9 -18   0 59.2378 9.51792   3
  -9 -18   0 44.4418 8.53302   2
  -9 -18   0 66.1301 10.4741   1
 -18  27   0 60.0227 7.99007   3
  15 -27   0 171.737 14.6149   1
  15 -27   0 158.206 11.0414   2
  12  15   0 97.2107 14.7384   1
  15 -27   0 187.365 14.5497   3
  15 -27   0 133.511 10.5771   2
 -12 -15   0 80.0614 11.2540   2
 -12 -15   0 94.7842 11.6539   3
  12 -27   0 141.805 11.7957   2
  12 -27   0 197.691 15.5585   3
  12 -27   0 176.092 15.2200   1
  12 -27   0 149.575 11.5870   2
  15  12   0 114.967 15.9760   1
 -15 -12   0 101.462 11.8982   3
 -15 -12   0 87.8285 11.9553   2
  27 -15   0 92.2915 10.2865   2
   9 -27   0 52.7718 6.76775   2
   9 -27   0 63.7579 6.57487   2
  18   9   0 76.7532 17.2042   1
 -27  18   0 58.4270 7.40228   2
   9 -27   0 70.6097 9.19881   1
   9 -27   0 60.0085 8.78251   3
 -18  -9   0 37.9404 7.68509   3
  -9  27   0 68.3404 7.15788   1
  27 -18   0 58.7402 7.42118   2
 -18  -9   0 67.1988 10.1602   2
  21   6   0 102.824 13.8450   1
 -27  21   0 86.5760 9.02386   2
   6 -27   0 95.5623 11.7415   3
   6 -27   0 93.6033 11.6397   1
   6 -27   0 94.5021 9.64318   2
 -21  -6   0 90.1900 12.3730   2
  -6  27   0 90.7045 9.18842   2
  27 -21   0 82.6444 9.03884   2
  -6  27   0 98.0600 9.88095   1
 -21  -6   0 89.1792 10.8736   3
   3 -27   0 422.703 33.3021   3
   3 -27   0 403.273 33.5365   1
  24   3   0 457.222 37.2421   1
  24   3   0 390.981 32.6029   3
 -27  24   0 432.401 29.2015   2
   3 -27   0 437.846 31.3427   2
  27 -24   0 440.216 30.7449   2
  -3  27   0 446.402 33.0266   1
 -24  -3   0 418.919 32.5903   3
  -3  27   0 440.248 32.1887   2
 -24  -3   0 503.511 36.7239   2
  27   0   0 322.671 30.0445   1
   0 -27   0 330.144 25.1563   2
   0 -27   0 320.105 27.8164   1
 -27  27   0 282.047 21.1683   2
 -27   0   0 300.712 22.2512   3
  27 -27   0 289.752 19.1124   3
  27 -27   0 270.329 19.8647   2
  27 -27   0 272.979 22.9521   1
   0  27   0 307.234 24.2714   1
 -27   0   0 284.746 27.8847   2
  27 -27   0 252.923 18.5831   3
 -28   2   0 160.323 14.3501   3
   2  26   0 150.829 16.4039   1
  26 -28   0 166.126 15.8393   1
  26 -28   0 171.270 12.9937   3
  26 -28   0 181.704 12.8407   3
  26 -28   0 151.329 12.3536   2
 -28   2   0 164.275 17.9615   2
  28  -2   0 145.302 19.2468   1
  -2 -26   0 127.042 16.4967   1
 -26  28   0 159.766 11.5114   2
  -2 -26   0 158.293 19.4917   3
  28  -2   0 139.770 13.5020   3
  -2 -26   0 157.785 15.5641   2
 -28   5   0 68.5990 7.46410   3
  23 -28   0 56.0928 7.11130   3
   5  23   0 72.3798 10.2883   1
  23 -28   0 77.3578 6.19624   2
  23 -28   0 87.5478 8.02477   3
 -28   5   0 75.7881 11.0944   2
  23 -28   0 57.4399 8.63521   1
  23 -28   0 65.1255 5.85612   2
  -5 -23   0 71.0916 11.6443   1
  -5 -23   0 67.1771 10.7768   3
  28  -5   0 80.5731 8.26587   3
  -5 -23   0 81.1137 10.8576   2
  20 -28   0 35.9080 5.80655   3
  20 -28   0 42.9491 3.93393   2
  20 -28   0 39.5300 7.19656   3
 -28   8   0 35.0112 4.58813   3
 -28   8   0 41.7630 4.81109   3
 -28   8   0 37.5577 8.79477   2
  20 -28   0 39.5444 6.69525   1
   8  20   0 34.0857 8.77380   1
  20 -28   0 41.0761 4.51769   2
  -8 -20   0 39.4677 9.19815   2
  -8 -20   0 52.7162 9.22702   3
  -8 -20   0 46.2824 10.8424   1
  17 -28   0 119.684 8.82459   2
 -28  11   0 98.9909 12.4935   2
 -28  11   0 113.831 8.38763   3
  17 -28   0 136.565 12.7256   1
  17 -28   0 128.457 9.08313   2
  11  17   0 139.739 15.5771   1
  17 -28   0 124.223 11.9925   3
 -11 -17   0 109.877 13.1758   3
 -11 -17   0 127.898 13.9285   2
 -11 -17   0 100.351 13.7763   1
  14  14   0 213.060 21.9604   1
  14 -28   0 226.183 19.0619   3
 -28  14   0 199.468 18.8361   2
  14 -28   0 246.357 16.3114   2
  14 -28   0 228.186 19.4330   1
  14 -28   0 231.124 15.9050   2
 -14 -14   0 223.253 21.1718   2
 -14 -14   0 238.833 21.0643   3
  11 -28   0 125.222 13.3116   1
  11 -28   0 129.298 10.7862   2
  17  11   0 139.810 16.3148   1
  11 -28   0 135.122 10.5830   2
 -28  17   0 129.299 12.4559   2
  11 -28   0 122.053 13.0862   3
  28 -17   0 113.122 11.6670   2
 -11  28   0 132.666 10.9701   1
 -17 -11   0 119.557 14.1969   2
 -17 -11   0 111.107 13.2164   3
   8 -28   0 37.1499 7.32135   1
   8 -28   0 39.1086 7.42533   3
  20   8   0 40.2878 10.1418   1
   8 -28   0 35.5268 5.48914   2
 -28  20   0 36.3691 5.85792   2
  -8  28   0 46.0085 5.92931   2
  -8  28   0 42.2833 6.13867   1
 -20  -8   0 35.4279 7.86676   3
  28 -20   0 43.9733 6.29831   2
 -20  -8   0 39.2120 9.52143   2
   5 -28   0 81.2595 11.3230   1
   5 -28   0 74.4815 10.6534   3
 -28  23   0 75.9001 7.89316   2
  23   5   0 85.0837 13.1845   1
   5 -28   0 60.1021 8.22077   2
  -5  28   0 82.4405 8.92272   2
  28 -23   0 61.7468 7.58737   2
 -23  -5   0 72.6316 9.66523   3
 -23  -5   0 55.1203 10.8722   2
  -5  28   0 79.5779 9.27626   1
   2 -28   0 144.990 14.5306   2
   2 -28   0 151.544 16.9297   1
  26   2   0 131.053 18.1935   1
   2 -28   0 166.413 17.9721   3
 -28  26   0 152.029 12.2339   2
 -26  -2   0 156.476 15.0292   3
  28 -26   0 165.053 15.9413   1
  -2  28   0 167.350 15.2029   2
  28 -26   0 144.950 12.7763   2
 -26  -2   0 162.268 25.5387   2
  -2  28   0 168.601 15.9000   1
  28 -29   0 18.2915 5.38618   1
  28 -29   0 18.2345 3.26316   3
  28 -29   0 19.6982 3.55143   3
 -29   1   0 16.2237 5.16063   3
  28 -29   0 14.6096 3.31811   2
   1  28   0 9.35262 4.99746   1
 -29   1   0 20.1851 7.54452   2
  29  -1   0 13.1350 7.07639   1
 -28  29   0 16.9935 3.51538   2
  -1 -28   0 16.7410 5.90372   2
  -1 -28   0 14.4114 6.83360   1
  -1 -28   0 28.5018 8.63787   3
  25 -29   0 9.03158 3.25670   3
  25 -29   0 16.0746 3.86599   3
 -29   4   0 16.6524 6.40841   2
  25 -29   0 10.2093 2.48027   2
  25 -29   0 5.71588 3.95147   1
 -29   4   0 12.1538 3.60416   3
   4  25   0 15.0745 5.79757   1
  -4 -25   0 7.91679 5.23585   3
  -4 -25   0 12.9125 5.53711   2
  -4 -25   0 3.85431 4.03047   1
  29  -4   0 7.58655 3.17885   3
  22 -29   0 45.2864 4.17727   2
  22 -29   0 49.2861 6.51025   3
  22 -29   0 45.0337 6.32876   3
 -29   7   0 32.0821 8.83433   2
 -29   7   0 41.1995 5.91118   3
 -29   7   0 50.7723 5.72816   3
  22 -29   0 45.5028 7.33466   1
  22 -29   0 41.8700 4.53579   2
  -7 -22   0 35.5443 8.37845   3
  -7 -22   0 48.1809 12.0889   1
  -7 -22   0 48.6890 10.1557   2
 -29  10   0 121.085 9.26332   3
 -29  10   0 114.109 9.23174   3
 -29  10   0 118.867 13.6109   2
  19 -29   0 118.084 13.0680   3
  19 -29   0 129.631 8.91966   2
  19 -29   0 136.935 12.2471   3
  19 -29   0 125.871 12.6582   1
  10  19   0 120.570 15.0489   1
 -10 -19   0 108.480 13.2872   3
 -10 -19   0 84.5621 13.1218   1
 -10 -19   0 101.847 12.6846   2
  16 -29   0 67.6237 9.24072   1
  16 -29   0 77.1824 6.33745   2
  13  16   0 86.4223 12.2942   1
  16 -29   0 93.7820 9.90749   3
  16 -29   0 79.9057 6.56128   2
 -29  13   0 58.6036 9.22680   2
 -13 -16   0 65.5295 10.3812   2
 -13 -16   0 69.3750 10.2442   3
  13 -29   0 76.2893 6.74362   2
  13 -29   0 78.6564 7.04171   2
 -29  16   0 61.9828 8.73684   2
  16  13   0 79.7655 12.4208   1
  13 -29   0 68.8258 9.43031   1
  13 -29   0 78.4314 9.63020   3
 -16 -13   0 64.3677 9.95923   3
 -16 -13   0 79.1528 10.9885   2
  10 -29   0 139.115 11.2252   2
  10 -29   0 124.301 13.7101   3
  19  10   0 136.072 16.8015   1
  10 -29   0 139.592 14.2034   1
  10 -29   0 129.420 11.3279   2
 -29  19   0 122.975 12.3424   2
  29 -19   0 113.527 11.7659   2
 -10  29   0 130.495 11.1758   1
 -19 -10   0 118.892 14.6814   2
 -19 -10   0 114.597 13.3384   3
   7 -29   0 57.4219 9.13027   1
   7 -29   0 42.4566 8.27730   3
  22   7   0 55.8295 12.7030   1
   7 -29   0 43.2622 6.53344   2
 -29  22   0 42.5569 6.23688   2
 -22  -7   0 39.9679 8.54900   3
  -7  29   0 50.7442 6.68180   2
 -22  -7   0 32.7452 8.57620   2
  29 -22   0 50.1923 11.3554   2
  -7  29   0 49.6680 6.93551   1
   4 -29   0 13.0146 4.97577   2
  25   4   0 11.8771 6.76639   1
 -29  25   0 12.8208 3.66295   2
   4 -29   0 5.04915 4.86699   3
   4 -29   0 15.9713 6.39225   1
  -4  29   0 4.52764 3.21325   1
  29 -25   0 7.21947 2.99044   2
 -25  -4   0 8.12909 5.28434   2
 -25  -4   0 14.4574 5.58939   3
   1 -29   0 14.2981 5.27713   2
   1 -29   0 19.2317 6.98632   3
  28   1   0 16.3656 7.09656   1
   1 -29   0 8.50207 5.12551   1
 -28  -1   0 27.9747 6.60059   3
  -1  29   0 10.9920 5.28892   1
  29 -28   0 18.0817 4.33221   2
  29 -28   0 15.2055 2.16185   3
  29 -28   0 21.3240 6.09540   1
 -28  -1   0 7.92749 6.39384   2
  27 -30   0 41.4986 4.53466   2
 -30   3   0 51.8448 11.0023   2
  27 -30   0 38.6885 5.36065   3
  27 -30   0 37.3479 7.41712   1
  27 -30   0 34.4936 6.50405   3
 -30   3   0 32.5823 6.11240   3
   3  27   0 48.1301 8.87471   1
  -3 -27   0 51.4693 12.4045   1
  30  -3   0 58.4405 14.7156   1
 -27  30   0 38.3488 4.51318   2
  30  -3   0 42.7243 6.78833   3
  -3 -27   0 43.6847 10.3902   3
  -3 -27   0 51.0013 9.91733   2
  24 -30   0 377.822 29.0080   1
 -30   6   0 399.561 31.6285   2
  24 -30   0 355.867 26.8521   3
 -30   6   0 365.077 26.3634   3
  24 -30   0 375.398 24.5401   2
 -30   6   0 369.387 26.6041   3
  24 -30   0 380.148 26.9152   3
  24 -30   0 395.625 24.5935   2
  -6 -24   0 405.402 31.3697   2
  -6 -24   0 372.414 32.0288   3
  -6 -24   0 387.718 33.7497   1
  21 -30   0 98.5524 7.16006   2
 -30   9   0 98.7138 12.5328   2
 -30   9   0 94.1053 8.26045   3
  21 -30   0 99.4503 11.1519   1
  21 -30   0 96.1188 10.2161   3
   9  21   0 92.7747 13.2455   1
 -30   9   0 98.7900 8.31333   3
  21 -30   0 100.687 7.70661   2
  -9 -21   0 96.6626 13.9008   1
  -9 -21   0 90.4191 13.4338   3
  -9 -21   0 103.454 12.8388   2
 -30  12   0 2.38498 3.07680   2
  18 -30   0 17.4105 2.34493   2
  12  18   0 8.46545 5.44398   1
  18 -30   0 10.1644 4.00372   3
  18 -30   0 11.4253 2.03853   2
  18 -30   0 20.8036 5.68083   1
 -12 -18   0 1.92514 3.22430   3
 -12 -18   0 0.77328 2.88125   1
 -12 -18   0 1.16094 3.01709   2
  15  15   0 10.2207 5.70320   1
  15 -30   0 18.2089 5.51615   3
  15 -30   0 19.5423 3.08590   2
  15 -30   0 28.6101 6.79706   1
 -30  15   0 27.1703 6.60822   2
  15 -30   0 17.4813 2.87355   2
 -15 -15   0 19.5603 6.98616   3
 -15 -15   0 18.0912 6.87736   2
  18  12   0 4.32948 5.33563   1
  12 -30   0 12.9432 3.28372   2
  12 -30   0 19.4023 6.20091   3
  12 -30   0 10.1482 4.15207   1
 -30  18   0 8.74970 3.81557   2
  12 -30   0 11.9170 2.79707   2
 -18 -12   0 0.11199 3.80935   2
 -18 -12   0 9.46371 4.78591   3
 -12  30   0 9.69909 3.22975   1
  30 -18   0 4.09419 4.16636   2
   9 -30   0 83.5076 11.2220   3
 -30  21   0 108.696 10.3398   2
   9 -30   0 88.5963 8.98512   2
   9 -30   0 80.3374 11.3961   1
   9 -30   0 94.1697 9.31968   2
  21   9   0 99.0552 14.2801   1
  -9  30   0 91.9247 9.43373   1
 -21  -9   0 96.6414 15.6387   2
 -21  -9   0 87.6740 11.8049   3
  30 -21   0 92.7319 10.0445   2
   6 -30   0 389.531 31.2028   1
   6 -30   0 376.536 27.6428   2
   6 -30   0 347.227 30.0181   3
  24   6   0 405.177 34.4344   1
 -30  24   0 359.291 26.6732   2
 -24  -6   0 391.328 32.3362   2
 -24  -6   0 384.601 29.4454   3
  30 -24   0 348.493 28.6516   2
  -6  30   0 364.026 27.7464   1
   3 -30   0 38.8146 7.31581   2
   3 -30   0 55.0868 12.2227   1
  27   3   0 33.7399 9.55317   1
   3 -30   0 47.8252 11.4865   3
 -30  27   0 45.6835 5.74705   2
  -3  30   0 40.1185 8.05721   1
  30 -27   0 40.6499 7.91696   1
 -27  -3   0 32.6776 10.1344   2
 -27  -3   0 40.6216 8.87274   3
  -3  30   0 57.8983 12.3197   2
  30 -27   0 51.7294 6.30698   2
   0 -30   0 49.8962 8.30963   2
   0 -30   0 47.8028 10.9803   3
   0 -30   0 42.9015 10.4390   1
  30   0   0 45.7751 11.5548   1
 -30  30   0 43.0491 5.19086   2
   0  30   0 40.7674 7.88705   1
  30 -30   0 35.0786 3.75084   3
  30 -30   0 46.4388 9.61208   1
  30 -30   0 35.7222 4.85127   2
  30 -30   0 38.2985 3.96800   3
 -30   0   0 50.4002 11.0398   2
 -30   0   0 38.2961 6.94882   3
 -31   2   0 16.7491 4.99510   3
  29 -31   0 19.1895 6.14090   1
  29 -31   0 13.2534 3.16256   3
  29 -31   0 15.7782 3.33321   2
   2  29   0 24.8280 7.83594   1
  29 -31   0 18.0259 3.95904   3
 -31   2   0 28.8397 9.35143   2
  -2 -29   0 21.1903 8.17334   3
  -2 -29   0 19.0771 6.20017   2
 -29  31   0 15.7652 3.23123   2
  31  -2   0 18.9153 9.14175   1
  26 -31   0 69.7904 7.59913   3
  26 -31   0 73.4967 9.60530   1
 -31   5   0 64.9263 7.74479   3
 -31   5   0 64.8895 13.1166   2
  26 -31   0 60.0347 5.40887   2
  26 -31   0 58.3549 5.28847   2
   5  26   0 58.8004 10.5030   1
 -31   5   0 48.6028 7.10070   3
  26 -31   0 55.4089 7.32010   3
  -5 -26   0 67.7943 11.5895   3
  -5 -26   0 41.9911 11.9899   1
  -5 -26   0 46.1491 10.0279   2
  23 -31   0 28.5475 5.50633   3
  23 -31   0 26.5959 6.84455   1
 -31   8   0 18.5741 6.63529   2
 -31   8   0 16.0199 3.72623   3
  23 -31   0 16.3372 2.21169   2
 -31   8   0 20.2017 3.84632   3
  23 -31   0 17.7070 4.85690   3
  23 -31   0 17.5325 2.31021   2
  -8 -23   0 6.74185 5.51474   2
  -8 -23   0 21.6265 7.47044   3
  -8 -23   0 18.2077 7.89470   1
  20 -31   0 11.1332 4.41628   1
  20 -31   0 10.9160 1.78560   2
 -31  11   0 7.56058 4.77890   2
 -31  11   0 11.2194 2.26380   3
  11  20   0 10.6240 5.80328   1
  20 -31   0 8.92215 3.90330   3
 -31  11   0 10.6247 2.19691   3
  20 -31   0 16.0581 2.19810   2
 -11 -20   0 6.07317 4.58107   2
 -11 -20   0 8.79708 6.00090   1
  17 -31   0 77.2485 9.35026   3
  17 -31   0 75.7668 9.71844   1
 -31  14   0 49.4222 9.00519   2
  14  17   0 72.2054 12.1904   1
  17 -31   0 67.3280 5.61554   2
  17 -31   0 60.5000 5.55232   2
 -14 -17   0 49.2958 9.58934   3
 -14 -17   0 58.1989 10.1506   2
  17  14   0 58.0501 11.3749   1
  14 -31   0 67.1706 6.27774   2
  14 -31   0 65.2339 9.39616   1
  14 -31   0 54.2981 5.76093   2
 -31  17   0 47.6910 8.12442   2
  14 -31   0 71.3635 9.38594   3
 -17 -14   0 83.0635 11.6255   2
 -17 -14   0 45.1951 9.37133   3
  11 -31   0 14.5724 5.38416   1
 -31  20   0 12.4263 4.35697   2
  11 -31   0 10.7891 3.37883   2
  11 -31   0 8.96673 2.74076   2
  11 -31   0 13.4443 5.14564   3
  20  11   0 3.29341 5.45863   1
 -11  31   0 14.1466 4.79889   1
 -20 -11   0 7.16595 6.28778   2
 -20 -11   0 11.0931 5.86634   3
   8 -31   0 21.8519 5.32273   2
  23   8   0 17.7269 7.76013   1
 -31  23   0 21.7786 5.11619   2
   8 -31   0 20.3980 6.53250   1
   8 -31   0 18.1725 6.09811   3
  -8  31   0 28.3918 6.08001   1
 -23  -8   0 25.1171 7.08777   3
 -23  -8   0 17.3906 8.05119   2
  -8  31   0 18.0928 4.69208   2
  31 -23   0 19.2339 4.99469   2
 -31  26   0 56.5000 6.66641   2
   5 -31   0 35.3387 9.45979   1
   5 -31   0 41.0843 7.24659   2
  26   5   0 39.7560 10.3687   1
  -5  31   0 56.3069 9.69424   2
 -26  -5   0 65.5541 9.79942   3
  31 -26   0 46.5979 6.87153   2
  -5  31   0 68.5278 8.92426   1
 -26  -5   0 58.7202 12.5118   2
  29   2   0 22.8044 9.37600   1
   2 -31   0 12.9056 5.11057   2
 -31  29   0 12.2476 3.39027   2
   2 -31   0 13.4432 5.98285   1
   2 -31   0 17.5864 7.19896   3
 -29  -2   0 18.0917 7.80643   2
 -29  -2   0 10.8934 4.79470   3
  31 -29   0 12.8222 3.82582   2
  -2  31   0 12.9498 5.53331   1
  31 -29   0 13.5911 5.79136   1
  31 -32   0 98.4558 8.16543   3
  31 -32   0 110.621 12.9529   1
  31 -32   0 94.0893 8.62167   2
 -32   1   0 111.106 11.4820   3
   1  31   0 130.766 14.3058   1
 -32   1   0 88.1813 14.2792   2
  31 -32   0 93.9054 7.86257   3
  32  -1   0 114.853 17.8603   1
  -1 -31   0 91.0406 14.0001   3
  -1 -31   0 101.467 15.3194   1
  -1 -31   0 109.789 12.9726   2
 -31  32   0 115.910 9.14197   2
  28 -32   0 43.2538 5.72577   3
 -32   4   0 31.0352 5.94909   3
   4  28   0 36.8293 9.01114   1
  28 -32   0 31.9845 5.08288   3
  28 -32   0 36.9258 4.00619   2
  28 -32   0 36.9449 8.52160   1
  28 -32   0 40.1647 4.13199   2
 -32   4   0 31.5763 5.86662   3
 -32   4   0 55.9744 10.3247   2
  32  -4   0 59.7878 14.7986   1
  -4 -28   0 37.2883 8.44279   2
  -4 -28   0 29.0911 10.1802   1
  -4 -28   0 20.1718 7.35529   3
 -32   7   0 43.5196 6.13603   3
  25 -32   0 49.1137 4.08332   2
 -32   7   0 58.8251 10.5895   2
  25 -32   0 49.8917 11.2616   3
  25 -32   0 55.1600 8.47551   1
  25 -32   0 52.3879 4.21045   2
 -32   7   0 47.0621 6.19313   3
  25 -32   0 57.6422 7.30597   3
  -7 -25   0 50.2753 10.9034   2
  -7 -25   0 58.0887 11.1109   3
  -7 -25   0 62.5363 13.5550   1
 -32  10   0 110.559 14.6954   2
  10  22   0 128.200 16.4285   1
 -32  10   0 126.773 10.2571   3
 -32  10   0 133.578 10.3342   3
  22 -32   0 170.428 13.8255   3
  22 -32   0 128.150 8.47598   2
  22 -32   0 154.455 14.3447   1
 -10 -22   0 137.956 17.4373   1
 -10 -22   0 133.147 16.0524   3
 -10 -22   0 111.963 14.6963   2
  19 -32   0 101.968 11.2774   3
  19 -32   0 99.2123 7.39934   2
  19 -32   0 108.157 12.0847   1
  13  19   0 110.884 14.8671   1
 -32  13   0 105.983 12.8850   2
 -13 -19   0 109.323 14.1932   2
 -13 -19   0 114.230 14.5638   3
  16 -32   0 211.512 17.9383   3
 -32  16   0 169.142 17.2935   2
  16 -32   0 190.348 18.0476   1
  16 -32   0 184.944 13.6078   2
  16  16   0 188.625 20.8560   1
  16 -32   0 194.021 13.5752   2
 -16 -16   0 147.972 16.5357   3
 -32  19   0 90.9645 11.1461   2
  19  13   0 75.3889 23.3353   1
  13 -32   0 105.771 12.4346   3
  13 -32   0 120.116 13.1282   1
  13 -32   0 102.499 9.27184   2
  13 -32   0 107.276 9.09999   2
 -19 -13   0 116.704 14.8998   2
 -19 -13   0 97.2125 12.9094   3
  10 -32   0 140.694 12.2266   2
  10 -32   0 144.674 12.5232   2
  22  10   0 129.682 17.7637   1
  10 -32   0 177.350 16.5940   3
  10 -32   0 151.558 15.9886   1
 -32  22   0 115.533 12.8229   2
 -10  32   0 187.861 18.2585   1
 -22 -10   0 122.607 16.4929   2
  32 -22   0 145.914 14.3584   2
 -22 -10   0 119.820 15.0917   3
   7 -32   0 67.4104 10.9248   1
   7 -32   0 59.6682 10.3682   3
   7 -32   0 60.3007 7.90689   2
  25   7   0 52.7822 13.2095   1
 -32  25   0 52.1249 7.31221   2
 -25  -7   0 49.5630 9.50626   3
  -7  32   0 48.5404 7.50123   2
 -25  -7   0 51.1653 12.5988   2
  -7  32   0 63.0403 8.10266   1
  28   4   0 54.6033 13.4982   1
   4 -32   0 49.2044 9.77372   1
   4 -32   0 36.6128 7.05756   2
 -32  28   0 34.4255 5.42700   2
   4 -32   0 43.6657 10.5794   3
  32 -28   0 25.9913 5.72961   2
  32 -28   0 48.2558 8.52881   1
 -28  -4   0 44.5491 8.08149   3
  -4  32   0 38.2648 8.31902   1
 -28  -4   0 43.9297 11.5220   2
   1 -32   0 128.148 16.4260   1
 -32  31   0 113.354 10.5106   2
   1 -32   0 102.514 12.5537   2
   1 -32   0 105.848 14.7579   3
  31   1   0 126.996 18.4610   1
  32 -31   0 100.325 12.8260   1
  -1  32   0 120.630 13.6124   1
 -31  -1   0 94.5264 14.6402   2
 -31  -1   0 110.230 12.0029   3
  32 -31   0 97.2130 9.36829   2
 -33   3   0 31.4985 6.09997   3
 -33   3   0 33.9796 6.31655   3
  30 -33   0 32.9303 3.86809   2
   3  30   0 36.2929 9.39171   1
  30 -33   0 23.1891 4.61875   3
 -33   3   0 32.9667 9.12448   2
  30 -33   0 30.9099 3.93952   2
  30 -33   0 37.0970 8.56404   1
  -3 -30   0 21.0582 7.77894   1
  -3 -30   0 29.7551 7.85308   2
  33  -3   0 49.8289 14.5334   1
  -3 -30   0 20.3700 7.95209   3
  27 -33   0 83.2007 10.8701   1
 -33   6   0 89.8366 13.1423   2
  27 -33   0 81.6931 5.91745   2
   6  27   0 84.3470 12.5491   1
 -33   6   0 74.6960 8.41726   3
  27 -33   0 76.8255 8.72818   3
  27 -33   0 82.9630 6.41501   2
 -33   6   0 74.3172 8.42154   3
  27 -33   0 81.7441 8.73702   3
  -6 -27   0 67.4056 12.6396   1
  -6 -27   0 80.1629 11.7403   2
  -6 -27   0 76.1663 12.3914   3
 -33   9   0 192.863 14.5610   3
  24 -33   0 233.716 17.3147   3
 -33   9   0 193.817 21.6965   2
 -33   9   0 183.493 14.4692   3
  24 -33   0 178.644 17.6899   1
   9  24   0 165.570 21.6887   1
  -9 -24   0 205.707 22.5726   1
  -9 -24   0 194.159 20.6426   3
  -9 -24   0 185.583 19.5599   2
 -33  12   0 36.5950 8.68150   2
  21 -33   0 36.2660 7.06447   1
  12  21   0 16.3309 6.58003   1
 -33  12   0 28.8918 2.84958   3
  21 -33   0 38.6658 6.91055   3
 -33  12   0 28.4416 3.95299   3
 -12 -21   0 15.9757 6.68680   3
 -12 -21   0 17.6333 6.64786   1
 -12 -21   0 21.2588 8.78135   2
  18 -33   0 27.1042 3.06470   2
  18 -33   0 31.5391 7.73745   1
 -33  15   0 20.6897 6.50621   2
  18 -33   0 30.7213 7.40782   3
  15  18   0 14.4984 7.45732   1
  18 -33   0 25.2919 3.03300   2
 -15 -18   0 21.3550 7.72413   3
 -15 -18   0 23.7862 7.85021   2
  15 -33   0 22.7016 3.50239   2
  18  15   0 21.7252 8.46482   1
  15 -33   0 24.2794 7.05256   3
  15 -33   0 23.9499 3.65061   2
 -33  18   0 20.3495 6.20980   2
  15 -33   0 23.8427 6.71011   1
 -18 -15   0 18.6286 7.13607   2
 -18 -15   0 11.7428 6.49096   3
  12 -33   0 24.8697 7.85606   1
 -33  21   0 24.7432 6.36331   2
  12 -33   0 23.6175 4.49389   2
  21  12   0 33.2792 9.19724   1
  12 -33   0 28.4269 7.29948   3
  12 -33   0 38.2051 4.93790   2
 -12  33   0 44.6330 7.64029   1
 -21 -12   0 27.1572 7.87851   3
 -21 -12   0 18.6670 7.00206   2
   9 -33   0 215.626 19.9848   3
   9 -33   0 209.696 20.0751   1
   9 -33   0 187.020 16.0514   2
  24   9   0 188.428 22.2677   1
   9 -33   0 175.005 16.2962   2
 -33  24   0 205.277 16.9852   2
 -24  -9   0 214.102 20.2789   3
 -24  -9   0 239.816 23.1712   2
  -9  33   0 177.178 19.0964   1
 -33  27   0 80.8990 8.96332   2
  27   6   0 71.7039 13.9005   1
   6 -33   0 90.3825 12.7825   3
   6 -33   0 78.7886 9.84032   2
   6 -33   0 98.3708 13.5162   1
  -6  33   0 69.9941 9.40108   2
 -27  -6   0 77.8217 13.3267   2
  -6  33   0 88.2552 10.2136   1
 -27  -6   0 81.9300 11.5713   3
   3 -33   0 40.8228 8.55080   2
   3 -33   0 34.1233 9.92849   3
  30   3   0 40.4172 11.7192   1
 -33  30   0 31.8124 4.97601   2
   3 -33   0 41.4632 11.4734   1
  -3  33   0 31.3828 7.82215   1
  33 -30   0 26.4434 7.39338   1
  33 -30   0 34.2778 5.27262   2
 -30  -3   0 44.4308 11.4702   2
 -30  -3   0 20.6883 6.80065   3
   0 -33   0 362.533 35.0990   1
  33   0   0 454.867 40.2401   1
 -33  33   0 377.161 26.5876   2
   0 -33   0 366.138 31.1449   2
   0 -33   0 453.114 35.4443   3
  33 -33   0 420.209 33.4057   1
  33 -33   0 375.308 27.5552   2
 -33   0   0 409.311 35.8587   2
   0  33   0 440.697 33.7879   1
 -33   0   0 406.341 30.8581   3
  32 -34   0 183.154 14.2574   3
 -34   2   0 248.450 23.9557   2
  32 -34   0 190.478 14.2261   2
   2  32   0 216.653 21.2493   1
 -34   2   0 188.974 17.4964   3
  32 -34   0 199.174 19.8956   1
  32 -34   0 203.684 14.6685   3
  34  -2   0 240.284 27.5291   1
  -2 -32   0 185.807 23.3007   1
  -2 -32   0 204.392 20.2124   2
  -2 -32   0 210.730 22.7456   3
 -34   5   0 51.9113 11.2941   2
  29 -34   0 45.1299 8.77196   1
   5  29   0 69.7505 11.5626   1
  29 -34   0 68.6636 7.38824   3
  29 -34   0 52.1395 5.54125   2
 -34   5   0 45.9668 6.87082   3
 -34   5   0 49.1813 7.10992   3
  29 -34   0 52.7861 4.32427   2
  29 -34   0 52.3331 6.67123   3
  34  -5   0 90.4943 15.9337   1
  -5 -29   0 50.0686 9.62024   2
  -5 -29   0 44.7088 11.3465   3
  -5 -29   0 75.5712 16.1172   1
 -34   8   0 77.6968 8.22251   3
  26 -34   0 89.2767 10.0800   3
  26 -34   0 85.2925 9.73282   3
 -34   8   0 93.7255 13.6387   2
 -34   8   0 84.1940 8.43254   3
  26 -34   0 87.5999 11.5513   1
  -8 -26   0 90.9589 13.9108   3
  -8 -26   0 104.948 15.9093   2
  -8 -26   0 92.7659 15.1403   1
 -34  11   0 187.969 13.2333   3
  23 -34   0 195.782 16.8689   3
 -34  11   0 245.211 28.9807   2
 -34  11   0 166.344 13.0795   3
  23 -34   0 202.096 18.2107   1
  11  23   0 192.699 20.7833   1
 -11 -23   0 159.182 18.3436   2
 -11 -23   0 172.390 19.1412   3
 -11 -23   0 182.877 21.3927   1
  20 -34   0 39.5783 7.11609   3
 -34  14   0 17.4804 6.96794   2
  20 -34   0 15.2624 1.87200   2
  20 -34   0 11.3074 4.56093   1
  20 -34   0 23.0682 1.96503   2
  14  20   0 5.92524 5.16549   1
 -14 -20   0 6.85974 4.97872   2
 -14 -20   0 11.6320 5.55229   3
  17 -34   0 51.9561 5.10001   2
  17 -34   0 53.7725 5.19079   2
  17 -34   0 62.4891 9.53281   1
  17  17   0 66.5189 12.4309   1
 -34  17   0 48.3922 9.77737   2
  17 -34   0 59.2537 9.01018   3
 -17 -17   0 53.2096 10.6469   3
 -17 -17   0 67.3934 11.2875   2
  14 -34   0 13.0115 3.36000   2
  20  14   0 17.2503 7.41306   1
 -34  20   0 10.6838 4.39699   2
  14 -34   0 13.9149 5.08808   1
  14 -34   0 21.2610 3.64982   2
  14 -34   0 18.6977 5.60731   3
 -20 -14   0 9.27341 6.73711   3
 -20 -14   0 8.15634 6.58620   2
 -34  23   0 183.053 16.8774   2
  11 -34   0 187.591 15.4338   2
  11 -34   0 199.534 15.4056   2
  11 -34   0 212.245 19.7490   3
  11 -34   0 176.785 18.9503   1
  23  11   0 175.836 21.9475   1
 -23 -11   0 203.359 19.1738   3
 -11  34   0 153.278 14.1932   1
 -23 -11   0 188.372 20.4784   2
   8 -34   0 98.3961 13.5085   3
  26   8   0 119.512 16.9991   1
   8 -34   0 88.4233 10.3776   2
 -34  26   0 92.3793 10.2641   2
   8 -34   0 111.792 14.2831   1
  -8  34   0 83.1192 10.1988   1
  -8  34   0 77.1873 9.67947   2
 -26  -8   0 111.520 15.2146   2
 -26  -8   0 94.9860 12.5551   3
 -34  29   0 74.5094 7.93523   2
   5 -34   0 60.8353 11.3088   3
  29   5   0 73.4415 14.5077   1
   5 -34   0 65.4287 11.5936   1
   5 -34   0 48.0277 8.37398   2
 -29  -5   0 63.7102 14.3512   2
  34 -29   0 52.8855 9.34140   2
  -5  34   0 58.2732 9.09740   1
 -29  -5   0 64.7209 9.96717   3
  34 -29   0 65.2832 10.4113   1
   2 -34   0 193.988 18.5750   2
 -34  32   0 176.073 14.8738   2
  32   2   0 229.158 26.3491   1
   2 -34   0 221.608 22.1195   3
   2 -34   0 186.081 21.9086   1
 -32  -2   0 251.561 24.5743   2
  34 -32   0 180.091 15.9445   2
 -32  -2   0 229.703 19.7967   3
  -2  34   0 209.104 20.0987   1
  34 -32   0 204.027 20.5180   1
 -35   1   0 338.048 23.8317   3
  34 -35   0 238.697 17.4673   3
  34 -35   0 270.181 19.0266   2
   1  34   0 277.894 25.5362   1
 -35   1   0 339.657 29.8338   2
  34 -35   0 289.660 25.4265   1
 -34  35   0 289.603 20.4682   2
  35  -1   0 360.048 34.9851   1
  -1 -34   0 305.572 29.3654   3
  -1 -34   0 288.436 25.8852   2
  31 -35   0 13.2387 2.30062   2
  31 -35   0 16.6623 5.87689   1
  31 -35   0 11.0675 3.70901   3
   4  31   0 7.92858 5.84803   1
 -35   4   0 12.6384 7.17259   2
 -35   4   0 15.2256 4.67508   3
  31 -35   0 18.2582 3.97909   3
 -35   4   0 11.7884 4.06410   3
  -4 -31   0 15.1139 9.23625   2
  -4 -31   0 24.6494 8.62590   3
  35  -4   0 17.4884 9.84317   1
  -4 -31   0 12.9563 7.13523   1
  28 -35   0 35.6922 6.06507   3
 -35   7   0 29.7029 8.71091   3
 -35   7   0 46.0625 6.20888   3
   7  28   0 20.9778 8.28704   1
  28 -35   0 25.9947 5.83037   3
 -35   7   0 65.1369 11.3665   2
  28 -35   0 31.2459 8.04432   1
  -7 -28   0 26.6479 10.5522   1
  -7 -28   0 25.8651 8.17573   2
  -7 -28   0 29.8546 8.59254   3
 -35  10   0 380.379 27.6136   3
  25 -35   0 389.836 32.1576   1
 -35  10   0 450.782 35.1557   2
 -35  10   0 414.385 27.7622   3
  25 -35   0 468.093 31.1604   3
  10  25   0 401.045 46.1319   1
 -10 -25   0 385.852 33.2254   3
 -10 -25   0 365.859 35.5825   1
 -10 -25   0 388.205 32.4202   2
  22 -35   0 84.8408 11.8343   1
 -35  13   0 94.7925 17.9246   2
  22 -35   0 111.236 11.9016   3
  13  22   0 84.3618 14.3521   1
 -13 -22   0 72.4752 12.6565   3
 -13 -22   0 106.555 14.0435   2
  19 -35   0 12.2791 2.04165   2
  19 -35   0 14.3683 5.47404   1
  16  19   0 3.58085 4.73442   1
 -35  16   0 16.0138 6.18679   2
  19 -35   0 19.5448 6.20065   3
 -16 -19   0 10.7314 6.57119   2
 -16 -19   0 3.47487 4.26225   3
  16 -35   0 8.96394 4.61456   1
  16 -35   0 12.4880 5.77478   3
 -35  19   0 5.95680 4.25383   2
  19  16   0 10.2018 7.19712   1
  16 -35   0 10.0487 2.58211   2
  16 -35   0 15.8818 3.13719   2
 -19 -16   0 11.0820 6.04603   3
 -19 -16   0 6.32560 5.65071   2
 -35  22   0 80.4501 10.9223   2
  22  13   0 81.7807 14.8460   1
  13 -35   0 89.4351 8.82375   2
  13 -35   0 93.9394 12.7342   1
  13 -35   0 94.9437 8.84899   2
  13 -35   0 107.510 13.8540   3
 -22 -13   0 86.2991 13.9548   2
 -22 -13   0 67.7903 11.9028   3
 -35  25   0 402.489 31.0584   2
  10 -35   0 421.582 34.6792   1
  10 -35   0 400.185 30.0423   2
  25  10   0 415.454 37.8890   1
  10 -35   0 482.715 35.1015   3
 -25 -10   0 419.874 34.7090   3
 -10  35   0 385.970 29.2695   1
 -25 -10   0 439.759 36.4881   2
  28   7   0 19.3647 8.08424   1
   7 -35   0 26.9725 8.25865   1
 -35  28   0 28.0277 5.95234   2
   7 -35   0 35.7230 9.86176   3
   7 -35   0 26.6430 6.28261   2
 -28  -7   0 22.8463 7.13239   3
  -7  35   0 25.7954 6.73036   2
  -7  35   0 26.5027 6.49244   1
 -28  -7   0 30.6085 9.17208   2
 -35  31   0 13.2554 4.07557   2
   4 -35   0 19.1601 8.13427   1
  31   4   0 25.8874 10.9654   1
   4 -35   0 19.3027 5.98998   2
   4 -35   0 12.1082 6.35949   3
  -4  35   0 20.7542 6.75766   1
  35 -31   0 22.5471 7.44872   1
 -31  -4   0 4.85733 3.98157   3
 -31  -4   0 15.4905 8.15863   2
  35 -31   0 11.0111 4.20785   2
   1 -35   0 251.475 28.8461   1
   1 -35   0 333.900 26.7508   2
   1 -35   0 310.757 29.6614   3
  34   1   0 352.407 35.1662   1
 -34  -1   0 357.399 25.6093   3
 -34  -1   0 347.596 30.5348   2
  35 -34   0 252.761 25.6032   1
  35 -34   0 253.209 20.7202   2
  -1  35   0 308.253 26.4372   1
 -36   3   0 108.758 11.8161   3
  33 -36   0 106.121 9.44088   3
  33 -36   0 123.620 9.95997   3
  33 -36   0 101.188 14.0720   1
   3  33   0 115.779 15.5484   1
  33 -36   0 108.975 8.20250   2
 -36   3   0 123.708 16.9618   2
  -3 -33   0 105.406 14.7140   2
  -3 -33   0 119.184 17.0293   3
  36  -3   0 146.107 22.9612   1
  -3 -33   0 127.842 18.6870   1
  30 -36   0 44.7730 9.88025   1
  30 -36   0 45.1859 6.88661   3
   6  30   0 48.8377 11.4194   1
 -36   6   0 40.8739 6.56115   3
 -36   6   0 49.3031 6.77166   3
  30 -36   0 45.3262 6.40821   3
 -36   6   0 73.3498 12.3170   2
  -6 -30   0 37.0125 10.3978   1
  -6 -30   0 39.6245 10.1050   2
  -6 -30   0 60.1765 13.5731   3
 -36   9   0 112.861 10.0349   3
  27 -36   0 119.365 11.9808   3
 -36   9   0 136.960 16.5180   2
  27 -36   0 109.805 13.7921   1
  -9 -27   0 124.378 17.0402   3
  -9 -27   0 123.690 15.6723   2
  -9 -27   0 126.963 18.3587   1
  24 -36   0 138.064 13.8457   3
 -36  12   0 120.622 9.22776   3
  12  24   0 174.561 19.5429   1
 -36  12   0 140.913 16.5012   2
  24 -36   0 146.838 15.8416   1
 -12 -24   0 123.902 17.7654   1
 -12 -24   0 105.593 15.3275   2
 -12 -24   0 110.822 15.9388   3
  21 -36   0 469.772 35.1339   3
  21 -36   0 478.510 36.4677   1
 -36  15   0 445.072 38.7977   2
  15  21   0 465.082 40.1706   1
 -15 -21   0 452.348 38.4468   3
 -15 -21   0 502.710 39.4049   2
 -36  18   0 59.7718 10.2705   2
  18 -36   0 63.4073 10.1412   3
  18 -36   0 58.8713 5.51465   2
  18 -36   0 77.2110 11.1084   1
  18  18   0 76.2584 13.7422   1
  18 -36   0 67.2829 5.64500   2
 -18 -18   0 69.9900 12.1495   3
 -18 -18   0 65.6423 12.6336   2
  15 -36   0 450.622 31.3270   2
  15 -36   0 464.147 31.2354   2
 -36  21   0 467.014 35.4102   2
  15 -36   0 476.595 37.1495   1
  15 -36   0 478.624 43.4251   3
  21  15   0 481.787 41.0058   1
 -21 -15   0 426.501 36.6641   3
 -21 -15   0 496.595 39.3886   2
 -36  24   0 133.323 13.9108   2
  24  12   0 140.859 18.9463   1
  12 -36   0 170.521 17.3172   1
  12 -36   0 116.193 11.4732   2
  12 -36   0 114.117 11.3236   2
  12 -36   0 138.638 16.1353   3
 -24 -12   0 121.268 15.9928   3
 -24 -12   0 140.139 18.9888   2
 -36  27   0 117.012 12.0576   2
  27   9   0 156.340 19.9287   1
   9 -36   0 126.223 15.8881   1
   9 -36   0 108.293 11.5657   2
   9 -36   0 114.578 15.0308   3
   9 -36   0 102.902 11.2434   2
 -27  -9   0 107.910 17.1820   3
  -9  36   0 108.765 11.4272   1
 -27  -9   0 118.313 16.8275   2
   6 -36   0 47.5937 11.1026   1
  30   6   0 47.5348 13.6248   1
   6 -36   0 61.8155 8.45007   2
 -36  30   0 48.1742 6.78544   2
   6 -36   0 38.1315 10.4485   3
  36 -30   0 49.6486 7.13970   2
  36 -30   0 49.7536 9.91664   1
  -6  36   0 43.0755 8.02037   1
 -30  -6   0 58.3800 10.0349   3
 -30  -6   0 43.1205 11.4224   2
  33   3   0 105.183 18.5813   1
 -36  33   0 113.083 10.2729   2
   3 -36   0 120.057 17.0274   1
   3 -36   0 111.199 16.1112   3
   3 -36   0 102.008 12.8348   2
  36 -33   0 98.7943 14.2422   1
 -33  -3   0 150.384 18.8112   2
 -33  -3   0 140.492 14.4398   3
  36 -33   0 93.6973 10.2734   2
   0 -36   0 843.880 64.3400   3
   0 -36   0 851.588 67.3199   1
   0 -36   0 988.903 71.4504   2
  36   0   0 950.897 71.2861   1
 -36  36   0 819.529 55.1712   2
   0  36   0 804.131 58.0999   1
  36 -36   0 860.258 58.9768   1
 -36   0   0 950.406 63.5371   2
 -36   0   0 762.251 55.0715   3
  36 -36   0 735.524 51.2113   2
  35 -37   0 109.044 8.77953   3
  35 -37   0 127.143 8.98197   2
  35 -37   0 112.290 9.30044   3
 -37   2   0 166.669 19.9625   2
  35 -37   0 119.527 15.6243   1
 -37   2   0 174.500 14.6214   3
   2  35   0 138.626 16.7541   1
  -2 -35   0 129.808 19.5262   1
  -2 -35   0 151.947 19.7759   3
  -2 -35   0 113.996 15.7877   2
  37  -2   0 224.567 26.7518   1
 -37   5   0 2.54307 3.07681   3
   5  32   0 5.00252 4.88816   1
  32 -37   0 8.66905 3.39856   3
 -37   5   0 14.2966 7.84428   2
 -37   5   0 5.90864 3.44305   3
  32 -37   0 12.9786 5.27722   1
  32 -37   0 6.61867 2.95848   3
  -5 -32   0 4.29587 5.10295   3
  -5 -32   0 3.42307 5.14361   2
  37  -5   0 15.0723 8.93675   1
  -5 -32   0 -2.3651 3.47254   1
 -37   8   0 132.062 16.7513   2
  29 -37   0 113.534 11.3400   3
  29 -37   0 131.967 14.5216   1
   8  29   0 101.050 15.4701   1
 -37   8   0 107.232 10.2774   3
  -8 -29   0 110.546 18.2653   1
  -8 -29   0 133.828 17.6723   3
  -8 -29   0 140.979 16.5005   2
 -37  11   0 168.411 13.1074   3
 -37  11   0 168.987 13.0230   3
 -37  11   0 197.421 20.5919   2
  26 -37   0 200.366 17.0592   3
  11  26   0 192.857 24.5463   1
  26 -37   0 212.399 19.2866   1
 -11 -26   0 205.282 21.0738   2
 -11 -26   0 169.915 22.5139   1
 -11 -26   0 194.177 21.7584   3
  23 -37   0 581.621 42.0065   3
 -37  14   0 603.061 44.8683   2
  14  23   0 591.482 47.6578   1
  23 -37   0 544.623 43.0936   1
 -14 -23   0 552.424 44.7003   3
 -14 -23   0 575.025 44.8700   2
  17  20   0 371.816 34.4654   1
 -37  17   0 395.871 31.5339   2
  20 -37   0 362.491 30.5720   1
  20 -37   0 353.114 29.4340   3
 -17 -20   0 379.526 33.1464   2
 -17 -20   0 361.719 32.1857   3
  20  17   0 390.753 37.2576   1
  17 -37   0 341.489 23.2575   2
  17 -37   0 327.610 23.1604   2
  17 -37   0 337.918 34.5503   3
 -37  20   0 342.003 28.4991   2
  17 -37   0 389.987 30.4060   1
 -20 -17   0 390.458 34.7939   2
 -20 -17   0 397.022 33.8675   3
  23  14   0 568.059 47.6154   1
  14 -37   0 580.813 43.1869   3
 -37  23   0 586.556 41.7304   2
  14 -37   0 521.870 37.7014   2
  14 -37   0 575.716 37.9565   2
  14 -37   0 597.046 44.2435   1
 -23 -14   0 672.218 51.6693   2
 -23 -14   0 629.609 48.9691   3
 -37  26   0 194.498 17.5853   2
  11 -37   0 210.639 21.2496   1
  11 -37   0 200.895 20.5912   3
  26  11   0 217.795 24.4463   1
  11 -37   0 177.094 15.8735   2
 -26 -11   0 168.051 19.5346   3
 -26 -11   0 238.439 23.8755   2
   8 -37   0 112.772 11.7603   2
 -37  29   0 116.003 11.5084   2
  29   8   0 128.611 18.5632   1
   8 -37   0 110.284 15.0070   3
   8 -37   0 103.821 15.1323   1
   8 -37   0 90.1938 11.8419   2
  -8  37   0 120.107 13.9262   1
 -29  -8   0 127.310 14.7797   3
 -29  -8   0 144.262 18.2226   2
  37 -29   0 76.6161 10.6468   2
 -37  32   0 5.93153 3.08139   2
   5 -37   0 5.36934 5.55315   1
  32   5   0 16.0418 8.90182   1
   5 -37   0 10.2519 4.87786   2
   5 -37   0 6.55215 4.64495   3
  37 -32   0 0.46024 2.37635   2
 -32  -5   0 12.8311 5.86192   3
 -32  -5   0 4.65078 5.96446   2
  -5  37   0 7.87425 4.37742   1
  37 -32   0 6.15193 5.17155   1
   2 -37   0 131.544 15.1932   2
   2 -37   0 173.377 20.0006   3
 -37  35   0 125.923 11.1948   2
   2 -37   0 96.3071 16.9796   1
  35   2   0 183.094 23.8398   1
 -35  -2   0 152.744 15.9002   3
  37 -35   0 144.362 17.1806   1
 -35  -2   0 187.062 21.6458   2
  -2  37   0 133.760 16.5599   1
  37 -35   0 116.355 11.4825   2
 -38   1   0 84.1982 15.3177   2
   1  37   0 86.0129 13.4519   1
  37 -38   0 69.2067 12.4645   1
  37 -38   0 81.3079 6.42054   2
 -38   1   0 78.7558 10.4637   3
  -1 -37   0 78.0767 12.2960   2
  -1 -37   0 101.045 17.0099   1
  38  -1   0 107.862 19.5276   1
  -1 -37   0 85.1949 15.5422   3
 -38   4   0 319.116 23.6676   3
  34 -38   0 257.755 25.9324   1
  34 -38   0 286.788 23.9190   3
 -38   4   0 321.562 30.3345   2
  34 -38   0 321.227 21.7535   3
   4  34   0 277.007 27.7888   1
  38  -4   0 333.193 35.9685   1
  -4 -34   0 296.993 32.4106   1
  -4 -34   0 329.350 31.1285   3
  -4 -34   0 332.424 28.9040   2
  31 -38   0 48.5116 7.37134   3
   7  31   0 60.0252 11.6802   1
 -38   7   0 74.3206 15.4379   2
  31 -38   0 57.3537 7.36460   3
  31 -38   0 62.2646 10.1657   1
 -38   7   0 60.7513 8.86714   3
 -38   7   0 50.7127 6.87508   3
  -7 -31   0 55.9822 13.2460   3
  38  -7   0 77.8825 18.9766   1
  -7 -31   0 65.7821 11.6510   2
  -7 -31   0 63.0831 16.1903   1
 -38  10   0 112.322 15.1662   2
  28 -38   0 106.135 10.9927   3
 -38  10   0 84.7908 8.26387   3
  28 -38   0 88.3571 12.5149   1
 -38  10   0 96.4924 8.56425   3
 -10 -28   0 97.0460 14.2974   2
 -10 -28   0 101.232 16.7048   1
 -10 -28   0 93.3774 15.0860   3
  25 -38   0 30.4396 8.15979   1
 -38  13   0 31.4043 8.81625   2
  25 -38   0 57.7966 8.85506   3
  13  25   0 37.8712 11.6215   1
 -13 -25   0 24.5685 8.85581   2
 -13 -25   0 17.5840 8.17715   3
 -38  16   0 19.6302 6.64814   2
  22 -38   0 33.3111 7.78265   3
  22 -38   0 25.3660 7.46202   1
  16  22   0 11.9509 7.37832   1
 -16 -22   0 8.71564 5.87423   2
 -16 -22   0 9.35578 5.92411   3
  19 -38   0 -0.6094 3.98579   3
  19 -38   0 -0.3452 3.33339   1
  19  19   0 2.99134 4.72602   1
 -38  19   0 -3.5574 3.35765   2
  19 -38   0 -0.4940 1.00901   2
 -19 -19   0 -5.0317 3.53715   3
 -19 -19   0 -5.4849 4.13562   2
  16 -38   0 34.2528 8.14916   3
  16 -38   0 16.4097 3.56706   2
 -38  22   0 13.6358 5.94348   2
  22  16   0 13.8291 7.95316   1
  16 -38   0 16.4845 3.70086   2
  16 -38   0 34.3268 8.97262   1
 -22 -16   0 17.5600 8.20275   2
 -22 -16   0 19.2368 7.34676   3
  13 -38   0 17.7684 6.88788   1
  13 -38   0 30.3971 5.12495   2
  13 -38   0 34.1034 9.83441   3
  25  13   0 14.4817 7.90513   1
 -38  25   0 27.8480 6.90554   2
 -25 -13   0 27.2448 8.89818   2
 -25 -13   0 23.0575 8.00140   3
  10 -38   0 84.7593 9.81711   2
  10 -38   0 96.2879 13.7629   3
  28  10   0 98.4280 16.7726   1
 -38  28   0 97.2991 11.0016   2
  10 -38   0 88.0273 9.89832   2
  10 -38   0 87.5212 13.7346   1
 -28 -10   0 73.9825 12.3130   3
 -28 -10   0 100.773 15.5872   2
   7 -38   0 52.7340 12.2887   3
   7 -38   0 59.2522 8.47477   2
   7 -38   0 54.8304 13.1988   1
  31   7   0 78.8933 15.1721   1
 -38  31   0 51.1563 7.44433   2
 -31  -7   0 85.8742 17.7603   2
  38 -31   0 57.0305 8.02693   2
  38 -31   0 53.1930 11.3815   1
 -31  -7   0 62.4377 10.6503   3
   4 -38   0 282.184 24.9849   2
 -38  34   0 291.227 22.1935   2
  34   4   0 336.799 34.2793   1
   4 -38   0 326.764 29.5736   3
   4 -38   0 319.338 30.9052   1
  -4  38   0 305.021 25.8314   1
 -34  -4   0 355.441 32.7586   3
 -34  -4   0 379.274 32.6661   2
  38 -34   0 292.212 27.3998   1
  38 -34   0 256.353 23.9491   2
 -38  37   0 82.6062 7.61737   2
   1 -38   0 88.4974 15.1760   3
   1 -38   0 75.7796 11.7277   2
   1 -38   0 100.141 16.2861   1
  37   1   0 92.9322 25.1061   1
  38 -37   0 67.4424 7.08541   2
  38 -37   0 81.4037 12.9838   1
  -1  38   0 67.7063 11.5938   1
 -37  -1   0 86.3769 11.1346   3
 -37  -1   0 95.7747 16.0706   2
   3  36   0 27.7282 9.07121   1
  36 -39   0 32.3144 8.99679   1
 -39   3   0 30.6055 7.00921   3
  36 -39   0 25.0218 3.49631   3
  36 -39   0 30.7704 3.59513   3
 -39   3   0 36.4190 11.9440   2
  -3 -36   0 22.9909 7.78854   2
  39  -3   0 25.7530 10.4884   1
  -3 -36   0 23.2538 10.0608   1
  -3 -36   0 33.7489 11.2234   3
 -39   6   0 164.310 20.3609   2
  33 -39   0 155.042 17.3967   1
 -39   6   0 156.987 14.0167   3
   6  33   0 165.223 19.6484   1
  33 -39   0 155.842 13.1632   3
 -39   6   0 134.296 13.6601   3
  33 -39   0 175.125 14.1796   3
  -6 -33   0 187.085 19.8202   2
  -6 -33   0 165.024 23.0747   1
  -6 -33   0 160.033 20.7248   3
  39  -6   0 167.346 24.6471   1
 -39   9   0 56.0685 6.55823   3
   9  30   0 40.9713 12.0803   1
 -39   9   0 50.8520 11.7417   2
  30 -39   0 46.2282 9.37603   1
 -39   9   0 54.2276 6.46381   3
  30 -39   0 64.7098 8.38962   3
  -9 -30   0 49.0458 12.7648   3
  -9 -30   0 70.9946 15.7918   1
  -9 -30   0 44.5886 11.2569   2
 -39  12   0 20.6672 7.87443   2
 -39  12   0 6.45471 1.68194   3
  27 -39   0 8.15821 5.02850   1
  27 -39   0 8.50558 4.27701   3
  12  27   0 7.25248 5.91850   1
 -12 -27   0 -1.7665 4.03988   2
 -12 -27   0 3.46536 5.31664   3
  24 -39   0 77.5559 11.0730   3
 -39  15   0 109.071 14.1625   2
  24 -39   0 85.5116 12.5429   1
  15  24   0 88.5184 15.1526   1
 -15 -24   0 109.862 16.0756   3
 -15 -24   0 94.9262 15.0931   2
 -39  18   0 18.6992 7.44452   2
  21 -39   0 24.8178 7.58612   3
  21 -39   0 17.8196 7.05717   1
  18  21   0 24.7302 9.81071   1
 -18 -21   0 2.32537 5.40113   2
 -18 -21   0 18.7492 8.22982   3
  18 -39   0 21.9627 3.10563   2
 -39  21   0 12.4972 5.88819   2
  18 -39   0 18.3467 3.03831   2
  18 -39   0 28.5344 8.93323   1
  21  18   0 45.8852 15.8936   1
  18 -39   0 20.3222 7.65108   3
 -21 -18   0 10.6871 6.31767   3
 -21 -18   0 21.9143 9.29039   2
  15 -39   0 76.7399 11.9467   3
  15 -39   0 56.5227 11.5381   1
  15 -39   0 74.1425 7.60233   2
 -39  24   0 91.0852 11.4476   2
  24  15   0 96.2696 16.0138   1
  15 -39   0 75.1881 7.68691   2
 -24 -15   0 82.5775 14.0191   3
 -24 -15   0 103.235 15.9060   2
  27  12   0 5.28864 5.44231   1
 -39  27   0 2.18785 3.68138   2
  12 -39   0 13.3473 6.32890   3
  12 -39   0 6.30469 3.20475   2
  12 -39   0 0.82506 3.41284   1
 -27 -12   0 11.7143 6.35667   3
 -27 -12   0 22.0320 9.02498   2
   9 -39   0 37.9896 10.5968   1
   9 -39   0 39.1733 11.2019   3
  30   9   0 55.8879 13.4801   1
   9 -39   0 58.9869 8.20191   2
 -39  30   0 65.1717 8.32801   2
 -30  -9   0 67.3719 11.0436   3
 -30  -9   0 52.4403 12.7917   2
  39 -30   0 37.8264 10.2975   1
   6 -39   0 161.136 20.3880   1
   6 -39   0 171.413 16.1947   2
 -39  33   0 158.461 14.1488   2
   6 -39   0 142.270 18.9495   3
  33   6   0 178.222 23.4734   1
 -33  -6   0 168.739 17.5662   3
  39 -33   0 146.163 18.0242   1
  39 -33   0 145.683 14.4245   2
 -33  -6   0 174.526 21.5267   2
   3 -39   0 35.0746 8.59842   2
 -39  36   0 37.0990 5.36817   2
  36   3   0 25.7333 10.9643   1
   3 -39   0 40.2764 12.7084   1
   3 -39   0 28.8942 10.5505   3
  39 -36   0 26.6559 4.90443   2
 -36  -3   0 13.7376 8.17938   2
  -3  39   0 33.6611 11.1980   1
 -36  -3   0 23.8097 9.59113   3
  39 -36   0 38.1153 10.3788   1
  39   0   0 12.3641 9.91605   1
   0 -39   0 20.8889 7.32376   2
   0 -39   0 20.4680 9.27367   3
   0 -39   0 13.8406 8.86299   1
 -39   0   0 6.80708 6.01595   2
  39 -39   0 13.4343 2.40792   2
  39 -39   0 18.1414 7.59595   1
 -39   0   0 12.1000 5.19820   3
  38 -40   0 31.3734 9.48525   1
 -40   2   0 44.6968 7.84070   3
 -40   2   0 55.5019 13.5444   2
  -2 -38   0 40.5384 12.3633   1
  40  -2   0 68.7072 18.8089   1
  -2 -38   0 44.3788 13.2046   3
  -2 -38   0 60.7871 12.1481   2
  35 -40   0 35.4271 5.41722   3
 -40   5   0 41.7651 12.2699   2
 -40   5   0 35.9557 6.51290   3
  35 -40   0 27.7776 4.72884   3
  35 -40   0 35.9826 10.1412   1
   5  35   0 26.4622 9.06655   1
  40  -5   0 29.1890 11.3977   1
  -5 -35   0 27.5840 10.7076   3
  -5 -35   0 30.0109 9.10267   2
  -5 -35   0 49.4776 14.9875   1
 -40   8   0 10.5778 3.83847   3
   8  32   0 6.22097 5.34705   1
 -40   8   0 -3.6232 4.81769   2
  32 -40   0 10.8871 4.07934   3
 -40   8   0 14.4765 3.83005   3
  32 -40   0 14.0594 9.79769   1
  -8 -32   0 11.3222 6.90920   2
  -8 -32   0 21.9557 10.3150   1
  40  -8   0 13.2849 8.78627   1
  -8 -32   0 18.4320 7.91213   3
 -40  11   0 36.6301 10.7850   2
  29 -40   0 41.6528 15.6008   1
 -40  11   0 38.7398 4.53451   3
  29 -40   0 42.1694 7.35888   3
 -40  11   0 34.1171 4.33148   3
 -11 -29   0 26.5317 8.55697   2
 -11 -29   0 23.8999 9.90212   1
 -11 -29   0 28.6272 10.3736   3
  14  26   0 96.6317 15.4955   1
  26 -40   0 63.6127 11.4681   1
 -40  14   0 74.1320 12.6779   2
  26 -40   0 74.2186 10.4094   3
 -14 -26   0 72.8035 13.9097   3
 -14 -26   0 80.1373 13.9387   2
  23 -40   0 72.2106 11.6656   1
 -40  17   0 84.1498 12.8596   2
  17  23   0 79.6865 14.8478   1
  23 -40   0 68.5733 10.8092   3
 -17 -23   0 79.0661 16.1904   3
 -17 -23   0 48.9399 12.7921   2
  20  20   0 199.103 23.7051   1
 -40  20   0 166.565 18.7450   2
  20 -40   0 190.517 19.0794   3
  20 -40   0 185.778 19.6896   1
 -20 -20   0 219.429 22.7340   2
 -20 -20   0 153.338 19.7213   3
  17 -40   0 74.0566 6.66487   2
  17 -40   0 70.0837 11.9768   1
  17 -40   0 55.4456 10.8373   3
  23  17   0 82.8022 15.3303   1
 -40  23   0 72.4051 10.9363   2
  17 -40   0 71.5292 6.63997   2
 -23 -17   0 53.8306 13.4167   2
 -23 -17   0 93.1995 14.1876   3
  14 -40   0 67.5180 7.66563   2
  14 -40   0 79.4812 8.08293   2
  14 -40   0 67.7299 11.8379   3
 -40  26   0 67.2720 10.2031   2
  26  14   0 75.4293 14.9606   1
  14 -40   0 91.1048 13.1999   1
 -26 -14   0 79.2912 15.0671   2
 -26 -14   0 100.063 14.4376   3
  11 -40   0 35.3503 6.75138   2
  29  11   0 13.0046 7.66486   1
 -40  29   0 34.0603 7.40037   2
  11 -40   0 23.6928 8.21904   1
  11 -40   0 20.8945 7.90193   3
  11 -40   0 40.8753 7.32517   2
 -29 -11   0 43.3355 12.1044   2
 -29 -11   0 32.7237 9.39283   3
   8 -40   0 8.61415 6.01948   3
   8 -40   0 15.8869 8.45573   1
  32   8   0 8.98308 8.10807   1
   8 -40   0 18.6407 5.70749   2
 -40  32   0 10.7523 4.35007   2
  40 -32   0 13.5322 6.72261   1
 -32  -8   0 22.4423 9.11449   2
 -32  -8   0 10.5143 7.01988   3
   5 -40   0 30.5475 9.77767   3
   5 -40   0 33.3582 10.6802   1
 -40  35   0 29.2973 5.52314   2
   5 -40   0 29.8613 7.77067   2
  35   5   0 38.4942 12.6806   1
 -35  -5   0 41.8550 9.62863   3
  40 -35   0 21.3168 8.03717   1
 -35  -5   0 31.2126 11.0345   2
  40 -35   0 33.4357 6.62350   2
   2 -40   0 34.6609 11.8290   3
   2 -40   0 46.4000 10.4510   2
   2 -40   0 55.2325 14.0539   1
  38   2   0 61.5275 16.3061   1
 -40  38   0 42.8203 5.75252   2
 -38  -2   0 53.9460 9.50623   3
 -38  -2   0 40.8022 12.2361   2
  40 -38   0 41.2790 11.1982   1
 -41   1   0 12.7920 8.86364   2
 -41   1   0 15.2460 5.53997   3
  40 -41   0 3.75261 5.36687   1
  -1 -40   0 15.4471 6.55979   2
  41  -1   0 24.4584 12.9563   1
 -41   4   0 89.1288 10.1778   3
  37 -41   0 73.7356 6.55380   3
   4  37   0 70.4496 16.1349   1
 -41   4   0 83.6808 15.8034   2
  37 -41   0 82.2559 6.89644   3
  -4 -37   0 92.5664 16.0923   3
  -4 -37   0 76.4504 19.0900   1
  -4 -37   0 115.680 14.9816   2
  41  -4   0 107.843 20.1120   1
 -41   7   0 63.6662 14.0835   2
  34 -41   0 45.8223 6.60271   3
 -41   7   0 48.7014 6.91872   3
   7  34   0 50.9877 12.3512   1
  34 -41   0 43.0791 8.66592   3
  34 -41   0 35.3897 10.4673   1
  -7 -34   0 46.0452 12.0639   2
  41  -7   0 61.1180 15.8655   1
  -7 -34   0 47.7099 15.4054   1
  -7 -34   0 46.0884 13.5975   3
  31 -41   0 43.8575 11.1132   1
 -41  10   0 56.2760 13.3264   2
 -41  10   0 42.1175 6.92598   3
 -41  10   0 43.5693 5.55667   3
  31 -41   0 43.1096 7.41890   3
  10  31   0 61.0076 16.3263   1
 -10 -31   0 46.6817 14.7033   1
 -10 -31   0 47.4935 12.4253   2
 -10 -31   0 48.3783 12.9560   3
 -41  13   0 44.5822 11.1266   2
  13  28   0 49.4565 13.8297   1
  28 -41   0 60.1100 8.93653   3
  28 -41   0 44.7086 12.0806   1
 -13 -28   0 50.0989 12.6054   2
 -13 -28   0 21.1121 8.82316   3
 -41  16   0 50.6761 12.3356   2
  25 -41   0 37.0969 9.10528   3
  25 -41   0 42.9353 13.6970   1
  16  25   0 74.2052 13.9232   1
 -16 -25   0 12.6129 7.66602   2
 -16 -25   0 46.1221 12.6384   3
  19  22   0 8.18380 6.76690   1
 -41  19   0 22.3946 7.80498   2
  22 -41   0 9.29772 5.84935   1
  22 -41   0 16.6101 6.27669   3
 -19 -22   0 18.5845 8.88012   3
 -19 -22   0 18.7322 8.33792   2
 -41  22   0 21.9384 7.43704   2
  19 -41   0 26.3452 8.43747   1
  19 -41   0 11.1842 6.08381   3
  19 -41   0 20.0473 2.31854   2
  22  19   0 16.5410 8.14704   1
 -22 -19   0 20.5772 9.17931   2
 -22 -19   0 30.7736 10.7282   3
  16 -41   0 46.0782 11.3827   1
  25  16   0 39.1195 11.4296   1
  16 -41   0 34.4370 4.94693   2
 -41  25   0 54.9582 10.5825   2
  16 -41   0 38.4750 10.4600   3
 -25 -16   0 62.4401 14.6873   2
 -25 -16   0 31.0500 9.64772   3
  28  13   0 53.8021 13.2086   1
  13 -41   0 39.7879 6.19564   2
 -41  28   0 45.9856 8.31843   2
  13 -41   0 51.8579 12.4239   3
  13 -41   0 53.3072 12.1551   1
 -28 -13   0 56.7987 14.5158   2
 -28 -13   0 47.7194 11.9636   3
 -41  31   0 44.9429 8.64533   2
  10 -41   0 40.5788 11.2008   3
  31  10   0 51.2082 14.6353   1
  10 -41   0 65.6602 13.9558   1
  10 -41   0 40.6669 8.00452   2
  41 -31   0 39.6980 10.7688   1
 -31 -10   0 36.9275 9.90018   3
 -31 -10   0 38.8205 11.3765   2
 -41  34   0 52.7526 7.66423   2
  34   7   0 65.2452 17.0848   1
   7 -41   0 54.9384 13.0954   3
   7 -41   0 64.3507 14.6827   1
   7 -41   0 48.8176 8.54692   2
  41 -34   0 49.1733 12.4118   1
 -34  -7   0 53.3451 10.7655   3
 -34  -7   0 58.3779 14.3703   2
   4 -41   0 82.6532 11.9697   2
   4 -41   0 73.9579 14.3034   3
 -41  37   0 80.4144 8.38940   2
   4 -41   0 96.4227 15.9643   1
 -37  -4   0 95.1826 13.2586   3
  41 -37   0 112.114 15.5604   1
 -37  -4   0 94.7271 16.6535   2
   1 -41   0 11.3433 9.76371   3
   1 -41   0 8.75375 5.69659   2
  40   1   0 6.01625 8.13283   1
 -40  -1   0 10.5797 5.52605   3
  41 -40   0 10.0861 2.02167   2
  41 -40   0 8.77912 6.06532   1
 -40  -1   0 3.20794 7.21142   2
 -42   3   0 51.7862 8.19596   3
  39 -42   0 22.5612 8.99393   1
 -42   3   0 37.5760 12.1041   2
  42  -3   0 58.1853 17.6244   1
  -3 -39   0 42.1294 16.3799   3
  -3 -39   0 52.9980 11.3597   2
 -42   6   0 73.5805 8.88515   3
  36 -42   0 73.7668 7.66002   3
   6  36   0 70.7723 16.6592   1
 -42   6   0 99.3611 16.0648   2
  36 -42   0 59.7309 11.6885   1
  42  -6   0 120.689 21.7541   1
  -6 -36   0 77.4160 13.6821   2
  -6 -36   0 91.4557 16.8196   3
  33 -42   0 53.4674 7.79569   3
 -42   9   0 55.7402 6.69185   3
 -42   9   0 55.9054 13.2217   2
 -42   9   0 56.0020 6.77784   3
   9  33   0 55.6721 13.4453   1
  33 -42   0 52.9037 11.8641   1
  -9 -33   0 74.5485 19.1388   1
  42  -9   0 56.9115 16.1875   1
  -9 -33   0 57.2344 15.1916   3
  -9 -33   0 74.2971 13.1579   2
  30 -42   0 61.0893 9.21809   3
  30 -42   0 62.0439 12.7613   1
 -42  12   0 75.0748 13.5745   2
 -12 -30   0 85.1830 15.4869   3
 -12 -30   0 62.2726 13.5980   2
  15  27   0 1.33315 4.56376   1
  27 -42   0 1.87322 3.44985   1
 -42  15   0 3.26105 5.66892   2
  27 -42   0 5.91010 4.19969   3
 -15 -27   0 -3.9012 3.31538   3
 -15 -27   0 0.54243 4.82858   2
 -42  18   0 7.37465 6.31796   2
  24 -42   0 9.81672 5.63868   3
  18  24   0 6.42000 6.61367   1
  24 -42   0 2.85695 6.50475   1
 -18 -24   0 10.5544 7.39382   2
 -18 -24   0 13.8100 7.89365   3
  21 -42   0 7.72652 4.94439   1
  21  21   0 9.12732 6.48509   1
  21 -42   0 1.59071 3.98457   3
 -42  21   0 0.64395 4.08441   2
 -21 -21   0 -3.7431 2.70747   2
 -21 -21   0 -4.2819 2.62144   3
  24  18   0 14.7636 8.47175   1
 -42  24   0 15.6836 6.68980   2
  18 -42   0 4.83732 5.45590   1
  18 -42   0 5.51685 5.10439   3
  18 -42   0 7.80981 2.07698   2
  18 -42   0 6.31589 2.06893   2
 -24 -18   0 11.2593 7.19799   3
 -24 -18   0 21.1719 8.86204   2
  15 -42   0 7.15279 5.54533   1
  15 -42   0 3.27028 2.29018   2
  15 -42   0 2.63124 2.19515   2
  27  15   0 5.47285 6.51098   1
  15 -42   0 -0.9678 4.08101   3
 -42  27   0 -5.5357 1.98050   2
 -27 -15   0 11.3306 6.77182   3
 -27 -15   0 8.97927 6.11402   2
  12 -42   0 71.0978 12.4341   3
  30  12   0 48.7325 13.8599   1
 -42  30   0 45.3158 8.93190   2
  12 -42   0 41.2027 12.2062   1
  12 -42   0 51.4992 7.32465   2
 -30 -12   0 49.7976 12.8434   2
 -30 -12   0 45.1229 11.6006   3
   9 -42   0 55.3256 8.54459   2
   9 -42   0 50.7459 13.6858   1
   9 -42   0 43.9392 12.4200   3
 -42  33   0 60.1329 8.48198   2
  33   9   0 75.6521 19.0442   1
 -33  -9   0 58.0014 11.6871   3
  42 -33   0 60.0927 11.7251   1
 -33  -9   0 89.9793 16.0357   2
   6 -42   0 94.1990 15.7902   3
   6 -42   0 95.7300 16.3949   1
   6 -42   0 92.0078 11.7692   2
  36   6   0 103.508 22.0473   1
 -42  36   0 90.8189 9.68610   2
 -36  -6   0 77.4834 12.4764   3
  42 -36   0 92.5664 14.2174   1
 -36  -6   0 76.8005 17.1925   2
   3 -42   0 30.5790 8.60111   2
   3 -42   0 41.6833 12.5740   3
  39   3   0 55.5918 15.7891   1
 -42  39   0 43.8934 7.62612   2
  42 -39   0 46.3955 12.3224   1
 -39  -3   0 44.3790 10.0960   3
  42   0   0 54.4442 16.7107   1
   0 -42   0 61.2664 12.6926   2
   0 -42   0 97.8202 20.0466   3
  42 -42   0 53.5262 15.1367   1
 -42   0   0 23.6213 10.5179   2
 -42   0   0 51.0572 8.78732   3
  41 -43   0 1.24335 4.23344   1
 -43   2   0 5.72905 7.32235   2
 -43   2   0 11.1061 5.09556   3
  43  -2   0 15.2824 9.59538   1
  -2 -41   0 4.09952 5.00822   2
  -2 -41   0 6.81374 7.37680   3
 -43   5   0 202.600 23.6097   2
 -43   5   0 176.263 15.0994   3
  38 -43   0 175.295 19.5404   1
  38 -43   0 146.131 11.5914   3
  -5 -38   0 176.888 24.2442   3
  -5 -38   0 196.190 21.3354   2
  43  -5   0 206.909 28.6267   1
   8  35   0 73.5349 17.2868   1
  35 -43   0 50.2298 7.41479   3
 -43   8   0 56.8601 14.3072   2
  35 -43   0 79.8590 12.4004   1
 -43   8   0 69.0948 7.72379   3
  -8 -35   0 75.4813 15.3221   3
  -8 -35   0 72.9368 15.1661   2
  43  -8   0 110.573 20.5219   1
 -43  11   0 130.740 9.74808   3
  11  32   0 122.495 34.3482   1
  32 -43   0 126.107 13.1101   3
 -43  11   0 127.085 9.91003   3
 -43  11   0 137.008 18.3214   2
  32 -43   0 109.866 15.6834   1
 -11 -32   0 120.686 17.5895   2
 -11 -32   0 143.734 20.0770   3
  43 -11   0 130.905 22.4276   1
 -43  14   0 155.076 19.3944   2
  29 -43   0 136.792 17.6194   1
  29 -43   0 166.640 16.1233   3
 -14 -29   0 144.315 20.6087   3
 -14 -29   0 168.408 20.6470   2
  17  26   0 69.8674 15.4753   1
  26 -43   0 34.1769 10.7604   1
 -43  17   0 68.5613 12.0953   2
  26 -43   0 44.6716 9.81678   3
 -17 -26   0 45.8014 12.0862   2
 -17 -26   0 50.9828 14.1098   3
  23 -43   0 27.9704 15.1433   1
  20  23   0 49.0482 14.0859   1
 -43  20   0 25.2033 8.22741   2
  23 -43   0 48.0183 9.49746   3
 -20 -23   0 23.3765 9.99466   2
 -20 -23   0 41.0733 11.8086   3
  23  20   0 56.5473 15.2225   1
 -43  23   0 47.7633 10.6158   2
  20 -43   0 33.5256 9.34432   1
  20 -43   0 44.7603 10.8203   3
 -23 -20   0 59.1328 14.0787   2
 -23 -20   0 51.8363 13.0036   3
  17 -43   0 42.2683 5.04731   2
  17 -43   0 46.5711 11.8580   3
  26  17   0 49.5564 13.3963   1
  17 -43   0 45.4886 5.13626   2
  17 -43   0 40.0833 11.0600   1
 -43  26   0 46.6298 10.5883   2
 -26 -17   0 67.1599 15.9508   2
 -26 -17   0 46.6078 12.2789   3
  29  14   0 148.013 21.9604   1
  14 -43   0 154.936 13.6975   2
  14 -43   0 168.795 19.5091   3
 -43  29   0 174.837 16.7478   2
  14 -43   0 143.866 13.0896   2
  14 -43   0 174.304 20.5111   1
 -29 -14   0 161.480 20.0469   3
 -29 -14   0 194.468 23.1841   2
  11 -43   0 115.213 12.4397   2
  11 -43   0 159.851 19.2744   1
  32  11   0 127.244 20.5157   1
 -43  32   0 118.702 13.3342   2
  11 -43   0 173.872 19.3983   3
  43 -32   0 117.197 16.9558   1
 -32 -11   0 124.319 19.7000   2
 -32 -11   0 149.051 17.8485   3
   8 -43   0 71.3332 14.0255   1
  35   8   0 84.7291 19.9717   1
   8 -43   0 66.7705 14.9314   3
   8 -43   0 49.1559 8.70451   2
 -43  35   0 64.1599 8.42058   2
  43 -35   0 67.6872 13.0534   1
 -35  -8   0 83.5722 13.3025   3
 -35  -8   0 94.1613 19.7845   2
 -43  38   0 175.601 14.3867   2
  38   5   0 205.434 26.9978   1
   5 -43   0 161.943 21.7144   3
 -38  -5   0 160.576 18.4515   3
 -38  -5   0 200.529 26.9831   2
  43 -38   0 191.736 21.4139   1
  41   2   0 4.08279 7.30938   1
   2 -43   0 7.03088 4.46865   2
   2 -43   0 3.11032 5.92756   3
 -41  -2   0 2.03810 3.97769   3
  43 -41   0 2.86432 4.59175   1
 -41  -2   0 6.36775 8.01789   2
 -44   1   0 19.0452 10.7774   2
 -44   1   0 30.0941 7.81595   3
  -1 -43   0 17.7728 9.56977   3
  -1 -43   0 24.3912 8.85307   2
  44  -1   0 16.8979 10.9908   1
 -44   4   0 113.041 12.3301   3
 -44   4   0 154.055 20.7965   2
  40 -44   0 111.800 16.0348   1
  -4 -40   0 105.206 18.6777   3
  -4 -40   0 132.509 16.5441   2
  44  -4   0 109.299 21.8971   1
 -44   7   0 41.5799 13.0155   2
 -44   7   0 27.0040 5.88114   3
  37 -44   0 30.4715 5.00005   3
  37 -44   0 24.2796 8.88766   1
  -7 -37   0 30.9615 11.7741   3
  -7 -37   0 33.5024 10.2078   2
  44  -7   0 31.8564 14.4640   1
  34 -44   0 38.0490 10.5182   1
  10  34   0 42.3745 12.6422   1
 -44  10   0 54.4806 14.1470   2
  34 -44   0 62.9046 8.30222   3
 -44  10   0 43.9739 6.42297   3
 -10 -34   0 45.3905 13.9428   3
  44 -10   0 113.510 20.7078   1
 -10 -34   0 69.0861 14.6793   2
 -44  13   0 10.6526 7.31485   2
  31 -44   0 17.3481 5.99778   3
  31 -44   0 16.4588 7.29563   1
 -13 -31   0 27.7311 11.4701   3
 -13 -31   0 22.0214 8.44860   2
  28 -44   0 170.509 18.9926   1
  28 -44   0 133.722 21.6586   3
 -44  16   0 168.054 19.7754   2
  16  28   0 135.209 20.2980   1
 -16 -28   0 154.355 21.1853   3
 -16 -28   0 154.892 20.5202   2
  19  25   0 31.8345 11.4456   1
  25 -44   0 14.3080 6.85030   1
 -44  19   0 21.7803 8.03983   2
  25 -44   0 26.8259 7.59498   3
 -19 -25   0 20.1335 9.21553   3
 -19 -25   0 29.5391 10.7286   2
  22 -44   0 268.815 35.9104   1
  22 -44   0 284.447 25.8674   3
  22  22   0 271.942 30.5670   1
 -44  22   0 283.716 26.4613   2
 -22 -22   0 263.255 28.6331   2
 -22 -22   0 285.810 28.8931   3
  25  19   0 17.5822 8.80851   1
  19 -44   0 20.7396 8.65781   1
 -44  25   0 30.5374 8.75526   2
  19 -44   0 76.8540 11.9376   3
 -25 -19   0 19.2222 7.93966   3
 -25 -19   0 31.6203 11.5478   2
  16 -44   0 168.526 20.3476   1
  16 -44   0 171.078 13.4087   2
  28  16   0 180.573 23.8543   1
 -44  28   0 153.353 24.1317   2
  16 -44   0 146.796 12.6808   2
  16 -44   0 133.238 18.1047   3
 -28 -16   0 186.860 21.6483   3
 -28 -16   0 167.595 22.6220   2
  13 -44   0 18.2806 4.99500   2
  13 -44   0 5.37166 5.55241   1
  31  13   0 19.8895 10.1680   1
  13 -44   0 15.5642 8.45131   3
 -44  31   0 23.5832 6.92337   2
 -31 -13   0 20.6857 9.62835   2
 -31 -13   0 28.3335 10.4579   3
  10 -44   0 43.7387 7.71856   2
  10 -44   0 50.8652 13.1865   3
  10 -44   0 43.5256 12.4576   1
 -44  34   0 58.3362 8.42136   2
  34  10   0 50.0923 15.4557   1
  44 -34   0 62.1600 12.5828   1
 -34 -10   0 57.2666 13.0362   3
 -34 -10   0 99.6075 20.4546   2
   7 -44   0 27.8910 7.26473   2
  37   7   0 30.0412 15.0604   1
 -44  37   0 40.9235 6.35348   2
   7 -44   0 31.2946 11.2649   3
   7 -44   0 18.2473 13.9895   1
  44 -37   0 37.3677 11.6180   1
 -37  -7   0 37.3959 10.2098   3
 -37  -7   0 43.6531 14.1059   2
   4 -44   0 118.487 13.8324   2
  40   4   0 84.7530 19.8188   1
   4 -44   0 112.187 18.2429   3
 -40  -4   0 98.0764 13.6289   3
  44 -40   0 93.2523 17.5697   1
 -40  -4   0 127.642 19.8195   2
   1 -44   0 27.7123 10.9862   3
  43   1   0 19.1573 11.6815   1
   1 -44   0 7.13609 5.23828   2
 -43  -1   0 13.6903 10.0540   2
 -43  -1   0 14.3307 5.86236   3
 -45   3   0 40.7896 14.4582   2
 -45   3   0 24.4289 6.80198   3
  45  -3   0 18.7282 12.8439   1
  -3 -42   0 15.9690 7.30043   2
  -3 -42   0 16.0153 8.95014   3
  39 -45   0 0.75563 4.29023   1
 -45   6   0 4.94810 3.34518   3
 -45   6   0 8.12806 8.11855   2
  -6 -39   0 10.6027 7.99125   3
  45  -6   0 5.56542 9.30893   1
  -6 -39   0 4.40443 5.60294   2
  36 -45   0 13.9895 4.19072   3
 -45   9   0 11.3688 3.50137   3
 -45   9   0 23.7896 10.1822   2
  36 -45   0 10.8521 6.46275   1
  -9 -36   0 7.70297 7.62410   3
  -9 -36   0 12.0110 7.51913   2
  45  -9   0 5.74404 8.09547   1
  33 -45   0 29.0618 9.48942   1
  12  33   0 48.4010 14.9514   1
 -45  12   0 52.9893 13.2387   2
  33 -45   0 58.9171 8.86494   3
  45 -12   0 76.7509 17.9484   1
 -12 -33   0 65.2583 22.1897   3
 -12 -33   0 78.0407 16.2715   2
 -45  15   0 13.2416 6.80433   2
  30 -45   0 23.0850 8.75777   1
  30 -45   0 15.2977 5.89126   3
 -15 -30   0 10.1775 7.79268   3
 -15 -30   0 10.5551 7.31066   2
  18  27   0 18.2782 9.60877   1
  27 -45   0 36.8693 10.7015   1
  27 -45   0 26.4023 8.02320   3
 -45  18   0 14.8105 7.10504   2
 -18 -27   0 3.11931 5.71327   2
 -18 -27   0 17.9034 8.96667   3
  24 -45   0 61.6805 11.2525   3
  24 -45   0 47.3457 11.6811   1
  21  24   0 31.0715 11.2303   1
 -45  21   0 60.5407 12.6102   2
 -21 -24   0 47.4831 13.4271   2
 -21 -24   0 21.5037 10.0514   3
  21 -45   0 41.8694 12.4537   1
 -45  24   0 42.9220 10.8355   2
  24  21   0 42.3633 12.9078   1
  21 -45   0 62.6933 11.8204   3
 -24 -21   0 73.0864 16.7720   2
 -24 -21   0 74.8894 14.8102   3
  18 -45   0 20.8794 8.84637   3
  18 -45   0 22.1804 3.21567   2
  27  18   0 17.8634 10.6713   1
  18 -45   0 19.8505 3.69433   2
 -45  27   0 25.4007 7.69269   2
  18 -45   0 22.0413 9.38334   1
 -27 -18   0 54.9814 14.3550   2
 -27 -18   0 27.2403 10.2181   3
  30  15   0 9.89147 7.59570   1
  15 -45   0 13.9764 7.34652   3
 -45  30   0 6.02637 5.19097   2
  15 -45   0 7.82612 3.21841   2
  15 -45   0 5.38900 5.46378   1
 -30 -15   0 31.4893 10.0127   3
 -30 -15   0 23.4426 10.5775   2
  33  12   0 24.2711 10.5592   1
  12 -45   0 48.3246 7.36628   2
 -45  33   0 46.1061 8.28102   2
  12 -45   0 45.8455 12.0703   1
  12 -45   0 44.9328 12.3335   3
  45 -33   0 54.4698 13.2295   1
 -33 -12   0 72.8663 13.2981   3
 -45  36   0 11.0071 4.34854   2
   9 -45   0 3.67971 5.47432   3
  36   9   0 25.7762 11.7194   1
   9 -45   0 11.8302 5.03041   2
   9 -45   0 10.1435 8.72931   1
 -36  -9   0 -0.4854 6.12629   2
 -36  -9   0 21.4631 8.43853   3
  45 -36   0 0.89794 4.67394   1
   6 -45   0 9.81444 7.40500   3
 -45  39   0 6.50079 2.90363   2
   6 -45   0 -0.7355 3.26547   2
  39   6   0 -2.7324 5.14569   1
 -39  -6   0 0.61942 6.31935   2
 -39  -6   0 3.56847 4.97180   3
   3 -45   0 20.1096 9.57692   3
   3 -45   0 16.9220 6.62494   2
  42   3   0 20.3061 11.6691   1
 -42  -3   0 19.5868 7.39292   3
 -42  -3   0 16.1382 10.7105   2
  45   0   0 75.9454 19.9376   1
   0 -45   0 84.7358 17.0004   3
   0 -45   0 57.8769 12.4736   2
 -45   0   0 59.5839 16.4008   2
 -45   0   0 55.6452 9.60815   3
 -46   2   0 48.4429 14.7171   2
  -2 -44   0 30.0362 12.0797   3
  46  -2   0 34.5087 16.0375   1
  -2 -44   0 16.4730 7.80667   2
 -46   5   0 11.9115 4.70318   3
 -46   5   0 6.92691 8.45351   2
  -5 -41   0 -0.6092 5.14309   3
  46  -5   0 15.9842 10.3080   1
  -5 -41   0 -1.0194 3.65710   2
  38 -46   0 48.8479 6.28831   3
 -46   8   0 52.4633 14.2506   2
 -46   8   0 38.5877 6.15484   3
  38 -46   0 41.0584 11.4412   1
  -8 -38   0 45.8027 11.9760   2
  46  -8   0 55.0870 16.8394   1
  -8 -38   0 45.2397 13.8812   3
  35 -46   0 79.6387 10.0006   3
  35 -46   0 84.1386 13.8593   1
 -46  11   0 89.1344 18.2468   2
  46 -11   0 115.814 26.3681   1
 -11 -35   0 94.5434 15.7441   2
 -11 -35   0 84.3221 17.1766   3
  32 -46   0 65.3264 14.6746   1
 -46  14   0 57.8168 13.4260   2
  32 -46   0 49.3288 9.34757   3
 -14 -32   0 66.0305 14.7635   2
 -14 -32   0 38.8374 13.6620   3
 -46  17   0 44.3297 12.2160   2
  17  29   0 56.7586 14.8232   1
  29 -46   0 29.7726 9.55176   1
  29 -46   0 44.4298 9.85015   3
 -17 -29   0 67.0450 15.4755   2
 -17 -29   0 64.2255 16.1622   3
  26 -46   0 456.516 35.9149   3
  26 -46   0 429.496 37.7030   1
  20  26   0 436.965 41.9354   1
 -46  20   0 458.300 38.2244   2
 -20 -26   0 443.693 39.5502   2
 -20 -26   0 416.544 39.0027   3
  23 -46   0 74.2491 13.8140   1
  23 -46   0 73.0456 12.8771   3
  23  23   0 86.6171 17.3308   1
 -46  23   0 108.878 14.9521   2
 -23 -23   0 56.1710 15.2653   2
 -23 -23   0 95.5194 16.4409   3
  26  20   0 447.682 43.7470   1
 -46  26   0 501.784 38.5352   2
  20 -46   0 474.035 40.8799   1
  20 -46   0 447.882 38.2327   3
 -26 -20   0 508.128 43.0729   2
 -26 -20   0 429.012 39.8349   3
  29  17   0 71.6485 16.5714   1
  17 -46   0 63.4484 13.2993   3
 -46  29   0 60.1297 10.5593   2
  17 -46   0 54.7585 5.94950   2
  17 -46   0 37.0237 11.4584   1
 -29 -17   0 59.9674 13.5919   3
 -29 -17   0 43.8761 14.2983   2
  32  14   0 54.8508 15.1461   1
  14 -46   0 80.7129 14.0270   3
 -46  32   0 50.3324 9.69890   2
  14 -46   0 66.9404 14.9914   1
  14 -46   0 60.3188 7.57100   2
 -32 -14   0 68.2876 14.8266   3
 -32 -14   0 64.6227 15.5899   2
  35  11   0 103.746 19.8957   1
 -46  35   0 71.4224 9.93880   2
  11 -46   0 79.8300 14.6362   3
  11 -46   0 73.1783 9.32268   2
 -35 -11   0 96.2736 15.2766   3
 -35 -11   0 112.279 18.8679   2
   8 -46   0 52.6857 8.61369   2
  38   8   0 68.1010 19.3099   1
 -46  38   0 41.1337 6.97126   2
   8 -46   0 34.7372 11.6618   3
 -38  -8   0 68.3957 12.3228   3
 -38  -8   0 47.2171 13.7313   2
  41   5   0 7.69728 8.27084   1
   5 -46   0 5.10302 7.63666   3
   5 -46   0 -0.0270 3.73516   2
 -41  -5   0 8.41926 5.08406   3
 -41  -5   0 3.62406 7.29003   2
   2 -46   0 45.6468 12.7691   3
   2 -46   0 29.4224 8.49496   2
  44   2   0 47.5353 16.0193   1
 -44  -2   0 13.7240 9.52330   2
 -44  -2   0 31.6949 8.14053   3
 -47   1   0 81.2871 11.5419   3
 -47   1   0 129.558 21.1292   2
  -1 -46   0 79.4187 13.7183   2
  47  -1   0 80.8223 23.1978   1
  -1 -46   0 80.5608 19.1211   3
 -47   4   0 3.17503 3.55694   3
 -47   4   0 4.34467 7.21317   2
  47  -4   0 -1.4482 5.69112   1
  -4 -43   0 5.46633 5.50127   2
  -4 -43   0 4.15285 6.04054   3
 -47   7   0 9.66295 8.46739   2
 -47   7   0 5.74181 3.39518   3
  47  -7   0 24.9132 13.9398   1
  -7 -40   0 1.88404 4.98339   2
  -7 -40   0 -1.1874 6.14488   3
  37 -47   0 0.76531 4.27618   1
 -47  10   0 -2.0924 4.88000   2
  37 -47   0 4.60798 3.13052   3
  47 -10   0 3.10501 8.34626   1
 -10 -37   0 1.57658 6.28692   3
 -10 -37   0 -2.7749 4.21206   2
  34 -47   0 31.0484 10.1377   1
  34 -47   0 24.8908 6.44753   3
 -47  13   0 24.0372 10.5989   2
 -13 -34   0 47.1333 11.9634   2
 -13 -34   0 42.7003 13.1679   3
  47 -13   0 20.1940 12.6886   1
  31 -47   0 94.0169 12.6284   3
 -47  16   0 85.2931 15.3002   2
  31 -47   0 111.825 15.8368   1
 -16 -31   0 86.7925 16.9104   3
 -16 -31   0 101.542 16.3534   2
  28 -47   0 30.7669 8.40316   3
  28 -47   0 20.9558 8.36980   1
  19  28   0 9.53004 7.52522   1
 -47  19   0 38.5889 11.2573   2
 -19 -28   0 27.0157 10.5297   2
 -19 -28   0 30.0511 13.6346   3
  22  25   0 135.852 21.2790   1
  25 -47   0 143.602 16.7724   3
 -47  22   0 96.7069 16.2485   2
  25 -47   0 123.507 17.9018   1
 -22 -25   0 135.420 20.8552   2
 -22 -25   0 193.399 23.3023   3
  22 -47   0 116.119 17.4554   1
 -47  25   0 103.810 15.9538   2
  22 -47   0 167.394 18.2124   3
  25  22   0 96.3930 19.2540   1
 -25 -22   0 107.881 18.2256   3
 -25 -22   0 122.198 19.6459   2
 -47  28   0 31.4972 8.92680   2
  28  19   0 4.94544 6.16221   1
  19 -47   0 25.1294 8.25154   3
  19 -47   0 29.5507 9.89460   1
 -28 -19   0 18.6001 9.15526   3
 -28 -19   0 21.8129 12.2155   2
  16 -47   0 103.491 10.4872   2
 -47  31   0 98.6805 12.9430   2
  16 -47   0 117.069 17.4829   1
  16 -47   0 102.326 15.6562   3
  31  16   0 97.3911 18.8748   1
 -31 -16   0 75.5666 14.4784   3
 -31 -16   0 97.5369 20.9773   2
 -47  34   0 37.0077 8.16711   2
  13 -47   0 33.6131 6.40073   2
  13 -47   0 35.7541 11.3106   3
  34  13   0 42.1922 15.2731   1
 -34 -13   0 46.1848 14.4145   2
 -34 -13   0 55.9083 13.3014   3
  37  10   0 0.69126 6.40243   1
  10 -47   0 8.73573 4.55674   2
  10 -47   0 17.5085 8.77043   3
 -47  37   0 10.7126 4.57193   2
 -37 -10   0 4.15066 5.17137   3
 -37 -10   0 14.9788 8.43087   2
   7 -47   0 4.59890 5.25965   3
 -47  40   0 6.60477 3.33253   2
   7 -47   0 9.85917 5.52945   2
  40   7   0 13.0796 8.67435   1
 -40  -7   0 1.83799 6.38656   2
 -40  -7   0 -0.5313 4.36530   3
   4 -47   0 15.1242 6.58804   2
   4 -47   0 5.81161 7.11705   3
  43   4   0 -2.9788 8.49740   1
 -43  -4   0 13.2761 9.14144   2
 -43  -4   0 1.70642 4.34626   3
  46   1   0 71.0823 19.6726   1
   1 -47   0 72.3709 12.5670   2
   1 -47   0 65.4769 16.8377   3
 -46  -1   0 117.059 20.8585   2
 -46  -1   0 85.2434 12.5053   3
 -48   3   0 92.1886 12.0461   3
 -48   3   0 140.863 21.4296   2
  -3 -45   0 114.829 16.3057   2
  -3 -45   0 86.4135 20.0320   3
  48  -3   0 129.575 24.9717   1
 -48   6   0 36.8450 12.1627   2
 -48   6   0 40.4946 8.21973   3
  -6 -42   0 43.0676 11.1672   2
  48  -6   0 51.7311 17.3143   1
  -6 -42   0 32.0654 13.4157   3
 -48   9   0 2.33963 6.44991   2
  -9 -39   0 4.43008 7.96269   3
  -9 -39   0 15.4699 8.39109   2
  48  -9   0 43.7797 17.3119   1
 -48  12   0 120.189 18.8652   2
  36 -48   0 88.1210 10.8454   3
  36 -48   0 87.0529 14.8908   1
 -12 -36   0 81.6422 15.3788   2
  48 -12   0 139.535 24.4025   1
 -12 -36   0 93.6939 18.1863   3
  33 -48   0 146.965 18.7057   1
  33 -48   0 134.858 17.3025   3
 -48  15   0 141.700 19.6325   2
 -15 -33   0 166.132 23.5038   3
 -15 -33   0 183.571 22.4953   2
  48 -15   0 190.081 28.3156   1
  30 -48   0 154.693 19.4770   1
 -48  18   0 193.430 21.5286   2
  30 -48   0 147.184 16.8748   3
 -18 -30   0 143.578 20.2615   2
 -18 -30   0 145.540 21.1174   3
 -48  21   0 15.8186 7.73860   2
  27 -48   0 17.6339 6.68254   3
  27 -48   0 6.75685 6.68653   1
  21  27   0 11.5743 8.43450   1
 -21 -27   0 14.9557 10.4625   3
 -21 -27   0 -2.2498 4.37366   2
  24  24   0 73.3616 30.6511   1
  24 -48   0 59.5475 11.7532   3
  24 -48   0 54.9803 14.2014   1
 -48  24   0 75.3342 13.4872   2
 -24 -24   0 81.3887 26.4552   2
 -24 -24   0 84.4710 16.9360   3
  21 -48   0 12.1618 6.25856   3
  27  21   0 6.94300 6.99110   1
 -48  27   0 6.88480 5.12162   2
  21 -48   0 -3.5547 3.30689   1
 -27 -21   0 4.08815 6.93811   2
 -27 -21   0 5.74557 6.71551   3
  30  18   0 151.712 23.1916   1
 -48  30   0 169.424 17.9034   2
  18 -48   0 168.262 21.2912   1
  18 -48   0 129.772 18.3783   3
 -30 -18   0 246.603 27.8905   2
 -30 -18   0 198.963 24.0375   3
  33  15   0 195.310 26.0149   1
 -48  33   0 176.035 17.1338   2
  15 -48   0 150.766 19.6830   3
  15 -48   0 142.573 12.8776   2
 -33 -15   0 164.022 20.8894   3
 -33 -15   0 177.866 24.4296   2
  12 -48   0 79.6647 9.72919   2
  12 -48   0 86.0765 15.7283   3
 -48  36   0 92.4566 11.3168   2
  36  12   0 120.043 21.3859   1
 -36 -12   0 88.7649 15.0798   3
 -36 -12   0 82.7556 19.1911   2
 -48  39   0 0.80985 2.94938   2
   9 -48   0 21.6435 8.77308   3
   9 -48   0 8.56439 4.59351   2
  39   9   0 3.32351 7.16720   1
 -39  -9   0 10.2517 9.68826   2
 -39  -9   0 8.93003 6.37606   3
   6 -48   0 59.4196 15.5702   3
   6 -48   0 41.8012 9.43335   2
  42   6   0 52.9566 16.5281   1
 -42  -6   0 47.1145 15.8115   2
 -42  -6   0 31.7025 9.50743   3
   3 -48   0 115.960 19.5266   3
  45   3   0 143.839 25.0725   1
   3 -48   0 70.7538 12.4273   2
 -45  -3   0 108.929 14.5776   3
 -45  -3   0 138.853 22.7027   2
  48   0   0 153.882 27.9171   1
   0 -48   0 156.257 18.5021   2
   0 -48   0 159.657 23.9862   3
 -48   0   0 163.401 17.4796   3
 -48   0   0 220.158 27.9635   2
 -49   2   0 34.0280 12.5533   2
  -2 -47   0 13.1085 7.32227   2
  -2 -47   0 15.0297 9.57979   3
  49  -2   0 12.7260 11.5837   1
 -49   5   0 59.3507 16.3111   2
  -5 -44   0 47.6340 12.4583   2
  49  -5   0 48.7699 16.9503   1
  -5 -44   0 40.3736 13.9196   3
 -49   8   0 14.4819 10.0257   2
  -8 -41   0 17.9400 9.69512   2
  -8 -41   0 19.0526 11.0114   3
  49  -8   0 41.7013 17.7012   1
 -49  11   0 20.6876 9.90333   2
  38 -49   0 24.7287 5.79563   3
 -11 -38   0 16.1657 8.18198   2
  49 -11   0 35.0131 14.7322   1
 -11 -38   0 21.3648 9.98379   3
  35 -49   0 38.2272 11.4285   1
  35 -49   0 25.0456 7.24180   3
 -49  14   0 22.4352 10.6551   2
 -14 -35   0 29.6608 10.9277   2
  49 -14   0 20.6410 10.3262   1
 -14 -35   0 30.2534 12.5139   3
  32 -49   0 34.2058 10.8067   1
 -49  17   0 37.7337 11.3728   2
  32 -49   0 52.4512 9.85821   3
 -17 -32   0 30.7255 18.3503   2
 -17 -32   0 22.9515 10.2049   3
  29 -49   0 30.5003 9.97221   1
 -49  20   0 9.18764 7.25611   2
  29 -49   0 18.0804 6.84116   3
 -20 -29   0 27.4293 11.0486   2
 -20 -29   0 32.0795 11.1078   3
 -49  23   0 63.6742 14.1441   2
  23  26   0 75.4529 18.2120   1
  26 -49   0 61.9476 11.6263   3
  26 -49   0 49.3835 12.9274   1
 -23 -26   0 78.3394 17.3462   3
 -23 -26   0 53.5730 15.1241   2
  23 -49   0 91.9429 18.6654   1
 -49  26   0 87.0018 13.7160   2
  23 -49   0 57.5411 12.0080   3
  26  23   0 100.052 18.8869   1
 -26 -23   0 65.0406 25.3164   3
 -26 -23   0 77.0616 18.0444   2
  20 -49   0 17.4645 9.91945   1
  20 -49   0 14.3035 6.76846   3
  29  20   0 15.0578 10.2764   1
 -49  29   0 24.6900 8.48280   2
 -29 -20   0 22.7285 10.5249   2
 -29 -20   0 11.0963 7.40554   3
 -49  32   0 45.0423 10.0355   2
  32  17   0 30.3476 13.2524   1
  17 -49   0 69.4606 13.4470   3
 -32 -17   0 41.0407 12.9128   2
 -32 -17   0 47.3357 12.4001   3
  14 -49   0 18.4292 5.29435   2
  35  14   0 7.65424 8.11699   1
  14 -49   0 19.5176 9.28397   3
 -35 -14   0 39.0844 11.2611   3
 -35 -14   0 38.7984 14.1115   2
  11 -49   0 24.1738 6.31828   2
  11 -49   0 15.9933 8.55537   3
 -49  38   0 19.8035 5.90239   2
  38  11   0 66.8076 20.1128   1
 -38 -11   0 25.4009 11.5433   2
 -38 -11   0 38.7219 11.8576   3
   8 -49   0 21.7887 7.13764   2
  41   8   0 34.8959 15.4919   1
   8 -49   0 16.3030 8.94094   3
 -41  -8   0 6.17570 8.00127   2
 -41  -8   0 22.1130 8.05500   3
  44   5   0 30.7716 14.9767   1
   5 -49   0 66.4591 10.8020   2
   5 -49   0 44.0965 13.1174   3
 -44  -5   0 69.4643 11.8541   3
 -44  -5   0 58.8225 16.9555   2
   2 -49   0 26.0128 11.0809   3
   2 -49   0 9.81936 5.74057   2
  47   2   0 15.1397 10.9431   1
 -47  -2   0 10.5107 9.46751   2
 -47  -2   0 10.8740 5.89550   3
 -50   1   0 3.65417 7.98279   2
  -1 -49   0 7.72038 6.12493   2
  50  -1   0 11.0945 18.8923   1
  -1 -49   0 10.8971 8.07392   3
 -50   4   0 109.836 20.2514   2
  -4 -46   0 78.1071 15.8913   2
  -4 -46   0 103.443 20.0787   3
  50  -4   0 127.383 29.7851   1
 -50   7   0 83.5944 19.4957   2
  50  -7   0 146.804 26.7320   1
  -7 -43   0 122.638 29.2975   2
  -7 -43   0 117.987 20.9932   3
 -50  10   0 112.025 19.0306   2
 -10 -40   0 74.7967 24.2319   2
  50 -10   0 126.246 24.7972   1
 -10 -40   0 100.699 19.3842   3
 -50  13   0 14.1716 8.56568   2
  37 -50   0 7.93868 4.68672   3
 -13 -37   0 14.9116 8.96000   2
 -13 -37   0 14.4654 8.94718   3
  50 -13   0 19.8139 12.8183   1
 -50  16   0 88.0740 20.9295   2
  34 -50   0 107.334 13.1065   3
 -16 -34   0 110.860 18.5321   2
  50 -16   0 143.622 25.2289   1
 -16 -34   0 117.729 20.1448   3
  31 -50   0 125.970 17.8803   1
 -50  19   0 78.0094 15.2532   2
  31 -50   0 93.4957 13.3648   3
 -19 -31   0 106.691 18.2009   2
 -19 -31   0 110.565 19.0388   3
  28 -50   0 58.2197 11.3410   3
 -50  22   0 48.9725 12.2686   2
  28 -50   0 73.5787 14.0442   1
 -22 -28   0 49.4865 14.5474   3
 -22 -28   0 55.5924 15.7642   2
 -50  25   0 10.5227 7.23018   2
  25 -50   0 18.5951 8.23001   3
  25 -50   0 19.0278 9.46131   1
 -25 -25   0 10.5556 8.29893   2
 -25 -25   0 18.5029 9.38989   3
  28  22   0 52.1824 15.3435   1
  22 -50   0 61.9732 14.1559   3
 -50  28   0 51.7250 12.3838   2
 -28 -22   0 73.3048 17.5840   3
 -28 -22   0 97.1929 20.6239   2
  19 -50   0 93.6667 15.2806   3
  31  19   0 109.187 20.3842   1
 -50  31   0 88.9377 13.6596   2
 -31 -19   0 95.1531 23.7871   3
 -31 -19   0 110.713 22.8442   2
  34  16   0 136.251 22.4533   1
  16 -50   0 104.968 17.1314   3
 -50  34   0 96.7190 13.3102   2
 -34 -16   0 129.676 21.1373   2
 -34 -16   0 105.315 17.2407   3
  13 -50   0 7.55343 6.48045   3
 -50  37   0 5.94278 4.38714   2
  37  13   0 0.62975 6.07026   1
 -37 -13   0 14.1495 8.99677   2
 -37 -13   0 0.60783 4.71260   3
  10 -50   0 86.6425 16.9908   3
  10 -50   0 91.6148 12.6587   2
  40  10   0 127.934 22.9863   1
 -40 -10   0 107.109 19.6726   2
 -40 -10   0 77.8546 14.1701   3
   7 -50   0 98.8233 12.7458   2
  43   7   0 118.367 23.2930   1
   7 -50   0 94.1991 20.4356   3
 -43  -7   0 141.837 22.3830   2
 -43  -7   0 89.2747 14.3195   3
  46   4   0 116.994 26.8561   1
   4 -50   0 111.407 14.3425   2
   4 -50   0 100.219 18.7120   3
 -46  -4   0 159.384 23.6721   2
 -46  -4   0 78.3043 13.0601   3
   1 -50   0 7.78390 8.17256   3
   1 -50   0 2.54355 4.68976   2
  49   1   0 7.53079 8.78943   1
 -49  -1   0 28.5651 12.8281   2
 -51   3   0 10.1673 9.73211   2
  51  -3   0 10.5074 10.8381   1
  -3 -48   0 8.36282 8.61383   3
  -3 -48   0 11.5573 6.87849   2
 -51   6   0 17.8052 10.0652   2
  -6 -45   0 18.6612 10.6271   3
  51  -6   0 26.4294 13.6184   1
  -6 -45   0 8.28766 6.44918   2
 -51   9   0 10.8076 7.68482   2
  -9 -42   0 16.7150 8.20160   2
  -9 -42   0 15.9245 10.4610   3
  51  -9   0 20.0496 12.8916   1
 -51  12   0 21.0150 10.0031   2
 -12 -39   0 13.3861 9.10090   3
  51 -12   0 39.1619 17.8184   1
 -12 -39   0 24.6330 10.4768   2
 -51  15   0 24.8819 10.9809   2
  36 -51   0 10.0626 5.08411   3
 -15 -36   0 14.2427 7.53341   2
  51 -15   0 17.1885 13.7409   1
 -15 -36   0 27.3587 12.3914   3
 -51  18   0 40.2355 13.0467   2
  33 -51   0 60.1176 10.3829   3
 -18 -33   0 62.2073 16.5877   3
 -18 -33   0 54.2064 15.9152   2
  30 -51   0 38.9523 10.4228   3
 -51  21   0 4.45903 6.26128   2
 -21 -30   0 28.6332 11.7606   3
 -21 -30   0 29.0460 11.4612   2
 -51  24   0 9.15425 7.39096   2
  27 -51   0 -0.4091 3.61285   3
 -24 -27   0 -0.0343 5.38864   3
 -24 -27   0 9.54857 8.55484   2
  24 -51   0 10.0371 6.79929   3
 -51  27   0 8.80133 6.81368   2
 -27 -24   0 2.06010 6.20292   3
 -27 -24   0 0.37525 6.15288   2
  30  21   0 33.6790 14.3312   1
  21 -51   0 28.5158 9.67047   3
 -51  30   0 32.7941 9.75000   2
 -30 -21   0 29.0279 13.0228   2
 -30 -21   0 35.3281 12.0999   3
  33  18   0 41.1888 14.6976   1
 -51  33   0 37.6500 9.42680   2
  18 -51   0 45.7867 12.1231   3
 -33 -18   0 31.6399 13.0308   2
 -33 -18   0 53.8157 14.2271   3
  36  15   0 17.0524 11.9543   1
  15 -51   0 8.15736 6.57653   3
 -51  36   0 22.6211 6.99355   2
 -36 -15   0 24.0141 14.5576   3
 -36 -15   0 6.92503 7.75934   2
  12 -51   0 22.1670 10.1003   3
 -51  39   0 33.0681 7.87811   2
  39  12   0 28.0394 13.2361   1
 -39 -12   0 41.6601 11.6326   3
 -39 -12   0 35.3753 14.6328   2
  42   9   0 33.9143 16.0532   1
   9 -51   0 17.1508 9.53151   3
 -42  -9   0 17.7276 8.16783   3
 -42  -9   0 8.00581 10.1190   2
   6 -51   0 11.6061 9.14138   3
  45   6   0 24.2234 12.5899   1
 -45  -6   0 38.7191 14.0701   2
 -45  -6   0 29.7542 9.28296   3
  48   3   0 1.61033 8.05921   1
   3 -51   0 6.56795 6.94549   3
 -48  -3   0 1.05534 6.31043   2
 -48  -3   0 -0.2377 3.62054   3
  51   0   0 39.9454 16.7915   1
   0 -51   0 27.6118 12.4360   3
 -51   0   0 51.9544 16.4261   2
 -52   2   0 3.83973 7.71590   2
  -2 -50   0 8.16108 6.73713   2
  -2 -50   0 5.06780 8.08587   3
  52  -2   0 5.76326 9.19846   1
 -52   5   0 11.9088 9.29659   2
  -5 -47   0 13.6296 10.3466   3
  52  -5   0 30.5156 13.3695   1
  -5 -47   0 8.77903 6.65822   2
 -52   8   0 18.0377 10.3265   2
  52  -8   0 16.0739 11.0094   1
  -8 -44   0 20.6524 10.9258   3
  -8 -44   0 14.4521 8.43053   2
 -52  11   0 -0.2929 5.43956   2
 -11 -41   0 18.7563 9.94912   3
 -11 -41   0 18.1340 9.02181   2
  52 -11   0 8.32360 11.5073   1
 -52  14   0 12.8391 8.14576   2
 -14 -38   0 12.5372 8.09348   2
 -14 -38   0 14.1216 9.71756   3
  52 -14   0 27.7098 13.8047   1
 -52  17   0 19.8497 9.56368   2
  35 -52   0 37.4718 9.03487   3
 -17 -35   0 48.6311 15.4666   3
  52 -17   0 3.05886 8.16866   1
 -17 -35   0 29.6495 10.5306   2
 -52  20   0 104.537 18.4385   2
  32 -52   0 96.3097 13.7447   3
 -20 -32   0 100.505 19.4159   3
 -20 -32   0 108.314 18.5882   2
 -52  23   0 6.48671 7.18266   2
  29 -52   0 2.46703 4.77548   3
 -23 -29   0 -5.2561 4.11382   3
 -23 -29   0 -2.7467 4.78984   2
 -52  26   0 -0.6272 4.22348   2
  26 -52   0 -0.9712 4.29550   3
 -26 -26   0 0.06475 5.63203   2
 -26 -26   0 1.07252 5.40332   3
  23 -52   0 0.70065 5.37294   3
 -52  29   0 -6.6607 4.41476   2
 -29 -23   0 -1.5902 5.26535   3
 -29 -23   0 -0.5848 6.16400   2
  32  20   0 105.998 25.3363   1
 -52  32   0 94.0783 13.6514   2
  20 -52   0 68.5848 13.9667   3
 -32 -20   0 86.6787 19.5275   2
 -32 -20   0 112.092 18.2116   3
  35  17   0 27.7652 13.9206   1
  17 -52   0 34.6200 11.2728   3
 -52  35   0 48.4459 10.2630   2
 -35 -17   0 24.4816 11.5780   2
 -35 -17   0 31.6330 10.7574   3
  14 -52   0 14.0251 8.76198   3
  38  14   0 14.6150 10.9259   1
 -38 -14   0 3.63924 7.51951   2
 -38 -14   0 28.0798 10.5962   3
  41  11   0 14.1914 10.3083   1
  11 -52   0 5.33294 7.25282   3
 -41 -11   0 32.2988 14.1937   2
 -41 -11   0 11.8802 10.6369   3
  44   8   0 21.8509 12.7237   1
   8 -52   0 18.5468 9.87349   3
 -44  -8   0 17.3923 11.2754   2
 -44  -8   0 22.8756 8.56531   3
  47   5   0 20.6899 12.0465   1
   5 -52   0 1.30978 5.95537   3
 -47  -5   0 22.6744 12.6415   2
 -47  -5   0 5.11646 4.47642   3
  50   2   0 -2.6833 6.42331   1
   2 -52   0 -0.1229 6.37306   3
 -50  -2   0 1.21078 8.91971   2
  -4 -49   0 26.2153 9.28347   2
  53  -4   0 24.1546 13.7665   1
 -53   7   0 49.9210 16.6807   2
  53  -7   0 53.1100 18.2711   1
  -7 -46   0 45.3878 12.7149   2
 -53  10   0 0.14374 5.89656   2
 -10 -43   0 9.80671 7.29452   2
 -10 -43   0 7.07157 8.42613   3
  53 -10   0 20.7956 13.5128   1
 -53  13   0 -5.7272 4.69483   2
  53 -13   0 1.07539 8.28475   1
 -13 -40   0 12.4972 10.5336   3
 -13 -40   0 5.63677 6.61208   2
  37 -53   0 63.3407 12.9772   3
 -53  16   0 76.5981 17.3420   2
  53 -16   0 100.203 25.7004   1
 -16 -37   0 68.0938 16.2651   2
 -16 -37   0 80.8109 19.4232   3
 -53  19   0 96.7303 16.9132   2
  34 -53   0 71.9023 11.8938   3
 -19 -34   0 58.8698 15.8672   3
  53 -19   0 40.1338 16.0724   1
 -19 -34   0 71.3916 17.0968   2
  31 -53   0 64.9825 13.6909   3
 -53  22   0 63.2404 15.1786   2
 -22 -31   0 98.6531 17.6519   2
 -22 -31   0 42.6304 14.0759   3
  28 -53   0 3.67601 5.21664   3
 -53  25   0 11.6874 7.30085   2
 -25 -28   0 24.2372 11.3631   3
  25 -53   0 4.86511 6.16943   3
 -53  28   0 5.43691 5.64818   2
 -28 -25   0 9.66792 7.39168   3
 -28 -25   0 0.44420 7.06623   2
  22 -53   0 42.2658 11.7133   3
 -53  31   0 45.0940 11.2396   2
 -31 -22   0 67.9160 16.8036   2
 -31 -22   0 44.5829 13.5175   3
  19 -53   0 69.7918 14.2894   3
 -53  34   0 85.0237 13.1310   2
 -34 -19   0 43.1818 14.8156   2
 -34 -19   0 88.9056 16.5578   3
 -53  37   0 84.5578 11.9089   2
  16 -53   0 68.2095 15.6120   3
  37  16   0 47.7685 16.7180   1
 -37 -16   0 65.4615 17.4118   2
 -37 -16   0 65.0844 14.9923   3
  13 -53   0 12.1180 8.14032   3
  40  13   0 6.25761 8.39165   1
 -40 -13   0 8.42640 8.67497   2
 -40 -13   0 -3.2103 4.52300   3
  10 -53   0 1.77256 6.49367   3
  43  10   0 3.08190 8.65163   1
 -43 -10   0 20.9756 11.2752   2
 -43 -10   0 3.87448 5.68136   3
  46   7   0 45.6694 16.7056   1
   7 -53   0 54.9432 15.7159   3
 -46  -7   0 54.0614 22.8819   2
 -46  -7   0 35.3671 10.7243   3
 -54   9   0 2.93333 6.91330   2
  -9 -45   0 17.6886 13.2456   3
  54  -9   0 3.83735 8.04716   1
  -9 -45   0 3.69777 5.56212   2
 -54  12   0 -9.0140 3.70084   2
  54 -12   0 4.85555 9.20902   1
 -12 -42   0 -1.6372 5.09190   2
 -12 -42   0 -3.7381 4.07809   3
 -54  15   0 3.34245 6.65771   2
 -15 -39   0 7.04599 7.06840   2
 -15 -39   0 4.72970 7.61515   3
  54 -15   0 -0.2661 8.13610   1
 -54  18   0 5.38614 6.77942   2
  36 -54   0 18.3403 6.52447   3
  54 -18   0 14.7745 11.8336   1
 -18 -36   0 1.93550 7.21447   3
 -18 -36   0 0.37379 5.55786   2
  33 -54   0 14.4911 7.15396   3
 -54  21   0 17.6675 8.34546   2
 -21 -33   0 18.4398 9.89503   2
 -21 -33   0 16.6107 10.6968   3
 -54  24   0 22.3791 9.92482   2
  30 -54   0 24.3546 9.24780   3
 -24 -30   0 15.2354 9.76830   3
 -24 -30   0 28.5973 12.1330   2
  27 -54   0 7.34559 6.74414   3
 -54  27   0 14.0132 8.19802   2
 -27 -27   0 6.63891 7.58362   3
 -27 -27   0 2.35347 7.12317   2
  24 -54   0 32.1807 10.3847   3
 -54  30   0 24.1989 9.18999   2
 -30 -24   0 23.8177 10.2443   3
 -30 -24   0 30.0197 12.9003   2
  21 -54   0 12.1765 7.06528   3
 -54  33   0 15.8293 7.38875   2
 -33 -21   0 13.0716 8.24656   3
 -33 -21   0 21.3987 11.9483   2
  18 -54   0 -2.3424 4.11538   3
 -54  36   0 1.81819 4.59053   2
 -36 -18   0 8.26369 9.70047   2
 -36 -18   0 9.83029 7.63732   3
  15 -54   0 -2.7632 4.92390   3
 -39 -15   0 1.23338 6.22795   3
 -39 -15   0 -1.5649 5.48105   2
  12 -54   0 -2.6889 3.84220   3
 -42 -12   0 2.35092 4.62481   3
 -42 -12   0 -1.5337 6.05712   2
   9 -54   0 14.5119 8.79852   3
  45   9   0 -3.9801 13.0223   1
 -45  -9   0 11.1277 11.5459   2
 -45  -9   0 7.39605 5.99432   3
 -55  11   0 21.4932 10.8518   2
 -11 -44   0 4.69486 6.89104   2
  55 -11   0 7.48400 11.2214   1
 -11 -44   0 4.42437 7.88038   3
 -55  14   0 42.6311 14.9499   2
  55 -14   0 8.67691 10.3545   1
 -14 -41   0 13.3988 9.03215   2
 -14 -41   0 14.8520 10.4168   3
 -55  17   0 21.4142 9.43734   2
 -17 -38   0 49.3880 14.6374   2
 -17 -38   0 28.4108 12.7101   3
  55 -17   0 15.1143 13.0561   1
  35 -55   0 7.92391 5.50087   3
 -55  20   0 15.4934 9.00878   2
 -20 -35   0 -3.4242 6.62034   3
  55 -20   0 10.4703 11.0553   1
 -20 -35   0 18.1391 9.72918   2
  32 -55   0 4.93555 4.69194   3
 -55  23   0 10.2474 7.69422   2
 -23 -32   0 3.58706 8.07419   2
 -23 -32   0 10.6746 10.1477   3
  29 -55   0 5.26620 5.56708   3
 -55  26   0 1.16652 5.25615   2
 -26 -29   0 21.3401 10.0617   2
 -26 -29   0 14.2460 9.92873   3
  26 -55   0 4.78801 6.47673   3
 -55  29   0 10.0734 6.83524   2
 -29 -26   0 -1.0704 5.50627   2
 -29 -26   0 10.3659 8.67406   3
 -55  32   0 5.79339 5.52520   2
  23 -55   0 16.4402 8.90412   3
 -32 -23   0 3.03418 7.89998   2
 -32 -23   0 29.3104 12.0261   3
 -55  35   0 16.6058 7.47047   2
  20 -55   0 9.39815 7.67076   3
 -35 -20   0 14.9292 11.4008   2
 -35 -20   0 10.4064 8.20825   3
  17 -55   0 42.1250 12.9089   3
 -38 -17   0 22.9592 12.0305   2
 -38 -17   0 30.6714 12.4694   3
  14 -55   0 25.4153 11.1552   3
 -41 -14   0 29.9785 10.2183   3
 -41 -14   0 23.5204 12.9452   2
  11 -55   0 6.04000 7.20801   3
 -44 -11   0 24.7053 11.9280   2
 -44 -11   0 12.7972 7.55946   3
 -56  13   0 9.35497 9.11311   2
 -13 -43   0 25.6941 10.3522   2
  56 -13   0 20.4664 13.9828   1
 -13 -43   0 14.6145 9.75379   3
 -56  16   0 42.0252 13.8821   2
 -16 -40   0 49.6780 19.5684   3
 -16 -40   0 41.4835 12.7452   2
  56 -16   0 46.3147 19.1343   1
 -56  19   0 41.6780 13.3167   2
 -19 -37   0 53.9637 15.8831   3
 -19 -37   0 40.4292 12.6399   2
  56 -19   0 50.5241 18.5535   1
  34 -56   0 3.16060 5.17511   3
 -56  22   0 14.1416 9.22838   2
 -22 -34   0 5.36124 8.25872   2
 -22 -34   0 16.1375 10.9002   3
  56 -22   0 25.9657 13.0715   1
  31 -56   0 36.6357 10.5777   3
 -56  25   0 41.7656 11.9449   2
 -25 -31   0 27.3261 11.8279   3
 -25 -31   0 13.4370 9.37961   2
 -56  28   0 6.42150 6.68093   2
  28 -56   0 -4.7054 3.22731   3
 -28 -28   0 0.55018 6.98942   3
 -28 -28   0 -5.8663 6.05610   2
  25 -56   0 25.0625 10.4840   3
 -56  31   0 36.3909 11.0427   2
 -31 -25   0 25.1788 11.2469   2
 -31 -25   0 29.7792 11.5570   3
 -56  34   0 26.1469 9.12377   2
  22 -56   0 26.1514 10.1170   3
 -34 -22   0 3.19941 8.08151   2
 -34 -22   0 1.74000 5.65522   3
  19 -56   0 50.5874 14.6087   3
 -37 -19   0 53.5280 17.7330   2
 -37 -19   0 58.4537 15.7528   3
  16 -56   0 38.3790 12.8650   3
 -40 -16   0 67.5858 16.1862   3
 -40 -16   0 36.2409 23.5309   2
  13 -56   0 16.5802 9.57796   3
 -43 -13   0 19.2686 12.3959   2
 -43 -13   0 5.31778 5.86819   3
 -57  18   0 10.2413 8.26884   2
 -18 -39   0 6.80969 8.63976   3
 -18 -39   0 26.7934 12.2803   2
  57 -18   0 0.79188 10.0202   1
 -57  21   0 35.9572 11.6385   2
 -21 -36   0 64.2311 16.4015   2
  57 -21   0 46.3239 17.0347   1
 -21 -36   0 69.2911 19.7033   3
  33 -57   0 11.6483 6.78384   3
 -57  24   0 15.2004 7.47075   2
  57 -24   0 5.59234 9.62323   1
 -24 -33   0 6.73622 7.94691   2
 -24 -33   0 15.5807 11.4077   3
 -57  27   0 32.8357 10.9440   2
  30 -57   0 50.4133 12.3857   3
 -27 -30   0 35.0378 13.1518   3
 -27 -30   0 39.9610 14.2022   2
  27 -57   0 42.9899 12.4436   3
 -57  30   0 40.8098 12.1284   2
 -30 -27   0 57.6808 17.9792   2
 -30 -27   0 60.5709 16.5630   3
 -57  33   0 3.95434 6.35221   2
  24 -57   0 16.1218 8.85272   3
 -33 -24   0 14.2761 9.88656   2
 -33 -24   0 11.5410 10.0444   3
  21 -57   0 57.2899 14.5454   3
 -57  36   0 68.8012 16.9765   2
 -36 -21   0 89.9850 17.7859   3
 -36 -21   0 95.2050 29.1793   2
  18 -57   0 2.57761 5.21534   3
 -39 -18   0 4.73692 7.50390   3
 -39 -18   0 4.83159 8.14022   2
 -58  20   0 12.2901 8.46402   2
 -20 -38   0 19.2079 10.7274   2
 -20 -38   0 24.3628 12.5425   3
  58 -20   0 11.0176 11.2918   1
 -58  23   0 32.9092 12.4156   2
  58 -23   0 42.2649 16.2691   1
 -23 -35   0 36.1699 19.1476   3
 -23 -35   0 7.72984 8.34994   2
  32 -58   0 0.07525 4.15855   3
 -58  26   0 3.93867 6.25912   2
 -26 -32   0 -4.5987 5.82780   2
 -26 -32   0 -0.5275 6.62699   3
  29 -58   0 1.02789 5.43297   3
 -58  29   0 -3.2595 4.68578   2
 -29 -29   0 5.21062 7.66958   2
 -29 -29   0 -0.5382 6.35459   3
 -58  32   0 14.1756 8.91509   2
  26 -58   0 -0.7931 4.38138   3
 -32 -26   0 1.65313 7.58190   3
 -32 -26   0 4.60252 10.2653   2
 -58  35   0 17.7903 9.48855   2
  23 -58   0 17.6891 9.88013   3
 -35 -23   0 24.2241 12.9249   2
 -35 -23   0 27.7214 11.8456   3
  20 -58   0 14.3725 8.46403   3
 -38 -20   0 17.7337 12.2312   2
 -38 -20   0 4.84773 6.64424   3
 -28 -31   0 0.75070 10.3342   2
 -31 -28   0 20.5386 10.7783   2
   2   1   1 0.19545 0.41920   2
  -2   0   1 0.11319 0.32252   3
  -2   5  -1 265.698 15.9909   1
  -2   5  -1 275.238 16.6630   2
  -3  -2  -1 273.252 17.4359   1
   5  -3  -1 252.132 15.9313   3
   5  -3  -1 226.313 16.4360   2
  -3  -2  -1 244.274 16.8493   2
  -3  -2  -1 251.156 16.7215   3
   3   2   1 254.178 17.5669   1
  -5   3   1 252.713 16.2025   3
   2  -5   1 289.743 17.0363   2
   3   2   1 248.229 17.1040   3
   2  -5   1 256.219 16.4201   1
   2  -5   1 276.993 17.3176   3
   2  -5   1 275.703 16.8841   2
   3   2   1 267.158 17.1913   2
  -5   3   1 228.221 16.7227   2
  -1  -2   1 5003.14 326.797   5
  -1  -2   1 5573.80 331.702   4
  -1  -3  -1 556.795 35.0862   3
   4  -1  -1 537.402 35.1718   2
  -1  -3  -1 576.901 35.0427   2
   1   3   1 524.236 33.8181   3
   1   3   1 531.098 33.2035   2
  -4   1   1 560.497 33.0131   3
   1   3   1 506.670 33.5439   1
  -4   1   1 519.292 33.4368   2
  -3   7  -1 274.935 17.0101   3
   7  -4  -1 223.051 16.8399   2
  -4  -3  -1 247.895 16.6619   3
   7  -4  -1 253.076 15.4025   3
  -4  -3  -1 226.577 16.6996   2
   3  -7   1 289.964 17.3246   2
   3  -7   1 260.926 16.8342   1
  -7   4   1 243.536 17.1786   2
   3  -7   1 272.827 17.1046   2
   4   3   1 248.655 17.4907   3
   4   3   1 243.751 17.6165   2
   3  -7   1 263.265 17.6660   3
   0   4  -1 0.62785 0.57624   1
   0   4  -1 0.79427 0.74803   3
   4  -4  -1 0.24576 0.45948   3
   0   4  -1 0.49624 0.72134   2
  -4   0  -1 -0.1410 0.40283   3
  -4   0  -1 0.93512 0.74182   2
   4   0   1 0.17780 0.85100   1
   0  -4   1 0.14185 0.71109   2
   0  -4   1 -0.3558 0.56682   3
   4   0   1 0.66485 0.85752   2
  -4   4   1 -0.1051 0.33239   2
   4   0   1 -0.0137 0.43543   3
  -4   4   1 0.76777 0.43479   3
  -4   3  -1 529.599 34.4279   2
   3   1  -1 545.327 35.0172   3
   3   1  -1 581.372 35.5805   2
  -3  -1   1 492.776 34.3604   3
  -1   4   1 560.531 33.9000   2
  -3  -1   1 537.245 34.6949   2
  -1   4   1 592.830 35.3266   1
   4  -3   1 556.622 34.9365   2
  -2  -4  -1 152.539 10.9488   2
  -4   6  -1 161.667 10.4917   2
  -2  -4  -1 169.164 11.1875   3
   6  -2  -1 144.952 10.9671   2
  -2  -4  -1 154.791 11.4044   1
   4  -6   1 170.071 10.8684   3
   2   4   1 162.528 11.0782   3
  -6   2   1 138.284 10.1750   3
  -6   2   1 138.565 10.8233   2
   2   4   1 152.977 10.8697   2
  -6   2   1 156.374 10.2197   3
   4  -6   1 174.197 10.9262   3
   2   4   1 159.011 11.3441   1
   4  -6   1 150.879 10.3074   2
  -4   9  -1 72.8540 6.05062   3
  -5  -4  -1 51.5961 5.49602   3
  -4   9  -1 65.4462 4.76267   1
  -5  -4  -1 55.3963 5.74853   2
   9  -5  -1 54.8425 5.25079   2
  -5  -4  -1 58.6752 6.39897   1
   5   4   1 52.1277 5.50621   3
  -9   5   1 52.5980 5.19901   2
   4  -9   1 61.8918 5.01700   1
   4  -9   1 60.7932 5.11070   2
   5   4   1 60.0365 6.44786   1
   4  -9   1 76.2590 5.47861   2
   5   4   1 51.7497 5.70066   2
   4  -9   1 65.9861 5.84097   3
  -5  -1  -1 727.867 44.5382   3
  -5  -1  -1 693.680 44.9399   2
  -1   6  -1 748.208 45.1920   3
  -1   6  -1 682.356 44.2071   1
  -1   6  -1 715.237 45.3787   2
   6  -5  -1 688.337 44.0191   2
   1  -6   1 767.022 46.2415   2
  -6   5   1 734.102 45.0963   3
   5   1   1 719.428 46.3397   2
   5   1   1 740.811 45.9599   3
   1  -6   1 679.433 45.7903   1
   5   1   1 800.328 47.3091   1
  -6   5   1 700.298 45.4228   2
   2   3  -1 237.261 17.0220   2
  -5   2  -1 242.219 16.7493   2
   3  -5  -1 286.441 16.6083   3
   2   3  -1 219.660 16.8800   3
   3  -5  -1 283.491 17.0470   1
  -5   2  -1 259.342 16.1697   3
  -2  -3   1 229.217 16.5294   3
  -3   5   1 293.077 16.2296   3
  -2  -3   1 244.735 16.7665   1
   5  -2   1 250.157 15.7218   3
   5  -2   1 224.641 16.7583   2
  -2  -3   1 237.706 16.6181   2
   5   0  -1 0.63059 0.78668   3
  -5   5  -1 0.24525 0.51535   3
   5   0  -1 -0.1545 0.86456   2
   0  -5  -1 0.99845 1.07285   1
  -5   5  -1 -0.2482 0.51944   2
   0  -5  -1 0.37563 0.64443   2
   0  -5  -1 0.00807 0.71978   3
  -5   0   1 0.25172 0.64934   3
  -5   0   1 -0.6363 0.90570   2
   0   5   1 0.16682 0.74180   1
   5  -5   1 1.22746 0.70736   2
   0   5   1 1.87337 1.08155   3
   0   5   1 0.58927 0.72036   2
   5  -5   1 -0.3441 0.50198   3
  -5   8  -1 48.4621 3.90647   2
  -3  -5  -1 39.2208 4.91756   1
  -3  -5  -1 38.8587 4.51959   3
  -3  -5  -1 47.2150 4.67458   2
   8  -3  -1 41.9492 4.47322   2
  -5   8  -1 56.3352 4.75803   3
   3   5   1 41.6408 4.56636   3
  -8   3   1 41.4851 4.46050   2
  -8   3   1 39.6817 3.49935   3
  -8   3   1 44.8198 3.58292   3
   5  -8   1 46.0074 3.76547   2
   3   5   1 41.8746 4.92907   1
   5  -8   1 47.6102 4.39673   3
   5  -8   1 57.4769 3.90969   1
   3   5   1 41.5373 4.47464   2
  -5  11  -1 173.663 13.2585   3
  -5  11  -1 182.422 11.9968   1
  11  -6  -1 158.629 12.6027   2
  -6  -5  -1 160.241 13.2757   2
  -6  -5  -1 185.078 14.3672   1
  -6  -5  -1 189.210 13.4068   3
   5 -11   1 165.034 12.3226   1
 -11   6   1 166.124 12.6763   2
   6   5   1 169.532 13.3464   2
   5 -11   1 184.642 13.2847   3
   5 -11   1 177.907 12.2279   2
   6   5   1 180.545 14.3630   1
   6   5   1 171.071 13.1571   3
   5 -11   1 191.916 12.5607   2
   8  -6  -1 5.70146 1.67260   2
  -6  -2  -1 4.73712 1.89426   1
  -2   8  -1 4.00977 1.26678   1
  -6  -2  -1 5.70762 1.90808   3
  -6  -2  -1 4.74086 1.69493   2
  -2   8  -1 3.52197 1.68429   3
   8  -6  -1 5.92814 0.79714   3
  -2   8  -1 5.94883 1.84667   2
   2  -8   1 7.51076 1.82168   1
   6   2   1 1.94327 1.66021   1
  -8   6   1 5.45774 1.45845   2
   6   2   1 3.87092 1.68978   2
   2  -8   1 6.44579 2.24826   3
   6   2   1 7.76714 2.14135   3
   2  -8   1 8.24327 2.05940   2
   5  -6  -1 739.414 44.0817   3
   1   5  -1 677.815 44.8936   2
  -6   1  -1 715.098 44.1485   3
   5  -6  -1 746.922 44.8663   1
   1   5  -1 655.949 44.9814   3
  -6   1  -1 708.612 44.8707   2
  -1  -5   1 715.383 45.6871   2
  -1  -5   1 673.346 45.7077   3
  -1  -5   1 679.985 45.4730   1
   6  -1   1 746.558 44.8958   3
  -5   6   1 784.502 44.8544   3
   6  -1   1 708.450 45.5575   2
   4   2  -1 132.877 10.5919   3
   2  -6  -1 157.193 9.88863   2
  -6   4  -1 160.933 9.78778   3
   2  -6  -1 159.336 10.6244   3
  -6   4  -1 146.948 10.3923   2
   2  -6  -1 152.729 10.7818   1
   4   2  -1 137.281 10.8850   2
  -2   6   1 169.876 10.2458   2
   6  -4   1 158.174 10.0118   3
  -4  -2   1 133.153 11.1382   2
   6  -4   1 157.357 11.2508   2
  -4  -2   1 137.108 10.8577   3
  -2   6   1 168.977 10.9931   3
  -1  -6  -1 697.132 44.1283   1
  -6   7  -1 676.520 42.9065   2
  -1  -6  -1 754.680 44.0136   3
  -1  -6  -1 683.441 43.4634   2
   7  -1  -1 664.369 43.0771   3
   7  -1  -1 646.131 43.8016   2
   1   6   1 657.318 44.0752   2
  -7   1   1 662.197 43.7296   3
   1   6   1 720.633 44.5968   3
   6  -7   1 666.864 43.5720   2
   1   6   1 681.447 44.6208   1
  -7   1   1 654.494 44.5291   2
   6  -7   1 748.429 43.8968   3
   6  -7   1 783.781 43.8441   3
  -6  10  -1 15.0135 2.07916   2
  -4  -6  -1 6.46133 2.34991   2
  -6  10  -1 11.1587 2.66040   3
  -4  -6  -1 15.6041 4.43436   1
  10  -4  -1 6.62562 2.20908   2
  -4  -6  -1 10.2787 2.83293   3
   6 -10   1 6.41491 2.37507   2
   4   6   1 7.36774 2.14824   1
 -10   4   1 6.84047 1.37938   3
 -10   4   1 5.78189 1.35124   3
   6 -10   1 7.23656 1.77390   1
   4   6   1 4.60541 1.74140   3
 -10   4   1 9.49706 2.42187   2
   4   6   1 7.49118 2.31464   2
   6 -10   1 4.67310 1.65191   3
  -7  -6  -1 393.233 27.4616   3
  13  -7  -1 391.518 26.3332   2
  -7  -6  -1 379.075 28.0913   1
  -7  -6  -1 400.764 28.8096   2
   7   6   1 359.980 28.9342   1
   6 -13   1 483.950 27.3338   2
   6 -13   1 431.738 27.3057   1
   6 -13   1 467.346 28.3035   3
   7   6   1 370.784 28.1085   2
   6 -13   1 440.174 26.8452   2
   7   6   1 350.057 27.6874   3
 -13   7   1 371.505 27.3879   2
  -3  10  -1 26.1085 3.03597   1
  -3  10  -1 24.0057 3.82046   3
  -7  -3  -1 27.0547 4.63898   1
  -7  -3  -1 30.0852 3.70965   3
  -7  -3  -1 25.9673 4.00244   2
  -3  10  -1 24.3700 3.21727   2
  10  -7  -1 20.0065 2.85159   2
   7   3   1 38.0527 5.15372   1
   3 -10   1 22.4191 3.22108   1
   7   3   1 31.7489 3.80229   3
   3 -10   1 23.7967 3.30735   2
   7   3   1 24.9028 3.92222   2
   3 -10   1 30.3527 3.98737   3
 -10   7   1 19.1040 2.86677   2
  -7   0  -1 -0.1113 0.99727   2
   0   7  -1 0.74141 1.69002   1
   0   7  -1 -0.3143 1.11869   2
   0   7  -1 -0.0898 0.94217   3
   7  -7  -1 0.74516 0.63385   2
  -7   0  -1 0.79595 0.98639   3
   7  -7  -1 2.02653 0.87226   3
  -7   7   1 0.18205 0.57495   2
   7   0   1 1.84895 1.05645   3
   0  -7   1 1.34486 1.43857   3
  -7   7   1 2.01622 0.86245   3
   0  -7   1 -0.5352 1.21192   2
   0  -7   1 1.00799 1.07296   1
   7   0   1 0.70307 1.31677   2
   4  -7  -1 256.658 16.5457   3
  -7   3  -1 242.131 15.8787   3
   3   4  -1 253.679 18.7684   1
   4  -7  -1 269.598 17.0416   1
   3   4  -1 248.929 17.1604   3
   3   4  -1 246.802 17.2495   2
  -7   3  -1 235.138 16.7712   2
   7  -3   1 241.142 16.2543   2
  -3  -4   1 226.038 16.5422   3
   7  -3   1 237.672 15.3105   3
  -3  -4   1 239.446 16.9437   1
  -3  -4   1 232.134 16.6538   2
  -4   7   1 262.662 16.1093   3
  -7   6  -1 666.685 42.3939   2
   1  -7  -1 675.116 43.1690   1
   6   1  -1 633.732 42.6796   3
   1  -7  -1 683.922 42.3599   2
   6   1  -1 660.938 43.3034   2
   1  -7  -1 726.632 43.1258   3
  -6  -1   1 612.515 43.4774   3
  -6  -1   1 664.253 44.1983   2
  -1   7   1 724.478 43.4201   2
   7  -6   1 720.318 42.7723   3
   7  -6   1 697.526 43.4085   2
  -1   7   1 705.611 43.9499   3
   9  -2  -1 1189.24 79.2600   2
  -2  -7  -1 1384.04 79.6851   3
  -2  -7  -1 1261.75 79.8490   1
   9  -2  -1 1203.34 78.8448   3
  -2  -7  -1 1276.94 79.2025   2
   2   7   1 1249.78 76.4074   1
   2   7   1 1284.24 75.9064   2
  -9   2   1 1220.33 76.1658   2
   7  -9   1 1070.47 76.1310   2
  12  -5  -1 6.44403 2.12299   2
  -5  -7  -1 4.32995 1.93646   2
  -7  12  -1 7.95208 2.26706   3
   5   7   1 9.95929 2.76426   2
   7 -12   1 5.70768 1.83452   3
   7 -12   1 5.30185 1.63438   1
 -12   5   1 8.93666 2.60432   2
   7 -12   1 5.84730 1.44522   2
 -12   5   1 5.81724 1.29469   3
   7 -12   1 5.74620 1.58112   2
  15  -8  -1 47.3670 5.93738   2
  -7  15  -1 63.4533 6.93502   3
  -8  -7  -1 56.4766 7.04263   2
  -7  15  -1 73.3224 5.70224   1
  -8  -7  -1 66.3902 7.12507   3
   8   7   1 65.3259 7.51343   2
 -15   8   1 62.9038 6.76800   2
   7 -15   1 74.4427 8.44289   3
   8   7   1 71.2924 7.47957   3
   7 -15   1 85.5081 6.63470   2
   7 -15   1 74.8440 6.79280   1
   8   7   1 68.8698 8.46690   1
   7 -15   1 67.0085 6.00971   2
  -4  12  -1 18.7659 2.69263   1
  -8  -4  -1 18.5269 4.02183   1
  -4  12  -1 16.1182 3.42186   3
  -4  12  -1 19.0641 2.99404   2
  12  -8  -1 19.0875 2.89320   2
  -8  -4  -1 26.3985 5.39231   2
  -8  -4  -1 18.2369 3.44657   3
   4 -12   1 17.6834 3.04974   1
   4 -12   1 20.5665 3.11248   2
 -12   8   1 22.4144 3.05564   2
   8   4   1 21.2627 5.25651   1
   4 -12   1 22.5007 3.80459   3
   8   4   1 18.3959 3.95968   2
   8   4   1 20.1018 3.43434   3
  -1   9  -1 1041.75 63.5312   3
   9  -8  -1 960.953 61.2514   3
  -8  -1  -1 958.064 62.4314   3
  -1   9  -1 959.428 62.3890   1
   9  -8  -1 985.096 61.7762   2
  -1   9  -1 1086.42 62.9995   2
  -8  -1  -1 984.276 63.3302   2
   1  -9   1 1119.01 65.3070   2
  -9   8   1 1051.20 63.6535   3
  -9   8   1 985.805 63.9369   2
   8   1   1 1025.39 65.5435   2
   8   1   1 987.940 64.6911   3
   1  -9   1 1066.25 65.1136   1
   1  -9   1 988.996 65.5536   3
  -8   2  -1 4.22908 1.88688   2
   2   6  -1 5.78444 2.08857   3
   6  -8  -1 3.68834 1.65451   1
   6  -8  -1 5.05749 1.39563   3
  -8   2  -1 7.37955 1.46248   3
   2   6  -1 5.64488 1.93301   2
   8  -2   1 7.14888 1.46523   3
   8  -2   1 7.93954 2.31272   2
  -2  -6   1 6.33348 2.24161   2
  -2  -6   1 7.84384 2.25730   3
  -6   8   1 4.64522 1.44716   3
  -2  -6   1 5.24212 2.05913   1
  -8   5  -1 47.9819 3.42665   3
   3  -8  -1 49.4883 3.70024   2
   3  -8  -1 46.0667 4.64662   1
   3  -8  -1 48.0152 4.54109   3
  -8   5  -1 41.3995 4.24227   2
   5   3  -1 39.3088 4.79698   2
   5   3  -1 48.0186 5.60784   1
   5   3  -1 42.5510 4.60543   3
   8  -5   1 42.7750 3.39798   3
  -5  -3   1 45.5157 5.06856   2
  -3   8   1 53.2093 3.82587   2
   8  -5   1 47.1950 4.38522   2
  -3   8   1 50.8405 4.68952   3
  -5  -3   1 45.5505 4.78514   3
   0  -8  -1 0.46492 1.24753   3
   8   0  -1 -1.5986 1.03406   2
   8   0  -1 1.59289 1.21430   3
  -8   8  -1 1.55299 1.03096   2
   0  -8  -1 4.42611 1.96900   1
   0  -8  -1 3.50782 1.39496   2
   8  -8   1 1.74529 1.06206   3
   8  -8   1 8.66268 1.66099   3
   8  -8   1 2.86466 1.11046   2
   0   8   1 3.91745 1.47252   2
  -8   0   1 0.50249 1.43325   2
   0   8   1 2.22919 1.31219   3
  -8   0   1 0.35092 1.03548   3
  11  -3  -1 822.424 55.6337   3
  -8  11  -1 929.478 53.8493   2
  11  -3  -1 830.766 55.1518   2
  -3  -8  -1 853.743 55.8721   1
  -3  -8  -1 873.539 55.4357   3
  -3  -8  -1 834.928 55.0949   2
   3   8   1 880.370 56.8845   3
 -11   3   1 827.982 56.6765   2
   3   8   1 849.114 57.1086   1
   8 -11   1 987.117 55.7131   1
 -11   3   1 830.158 55.2047   3
   8 -11   1 1015.74 56.2472   3
   8 -11   1 851.442 55.2105   2
   3   8   1 828.844 56.4981   2
  -6  -8  -1 55.0153 6.22500   3
  -6  -8  -1 44.8430 5.96644   2
  -8  14  -1 53.4665 5.82799   3
  14  -6  -1 47.8362 5.70806   2
   6   8   1 51.1527 6.61860   1
   6   8   1 60.1208 6.31010   3
 -14   6   1 46.7131 3.75340   3
 -14   6   1 55.0439 5.83305   2
 -14   6   1 47.9136 3.89695   3
   8 -14   1 41.8017 4.45899   2
   8 -14   1 48.8714 4.95721   1
   6   8   1 37.8688 5.50217   2
   8 -14   1 50.3380 5.51014   3
   8 -14   1 45.6146 4.29009   2
  -9  -8  -1 178.513 16.9928   1
  -8  17  -1 217.513 16.2961   3
  -9  -8  -1 187.086 15.9537   3
  17  -9  -1 191.943 15.2879   2
  -8  17  -1 225.859 14.3414   1
  -9  -8  -1 181.555 16.1832   2
   8 -17   1 218.257 15.5284   1
   8 -17   1 226.464 15.0144   2
   9   8   1 204.545 17.8135   1
   9   8   1 199.066 16.2628   3
   8 -17   1 200.306 14.3643   2
   8 -17   1 197.663 15.9138   3
   9   8   1 182.829 16.2859   2
  -9  -5  -1 406.198 30.1390   2
  -5  14  -1 442.141 28.4277   1
  -5  14  -1 442.199 28.7800   2
  14  -9  -1 403.744 28.8130   2
  -9  -5  -1 530.453 32.1572   3
  -9  -5  -1 377.552 30.7899   1
  -5  14  -1 464.588 30.3409   3
   5 -14   1 489.891 28.6704   2
   5 -14   1 418.683 28.5373   1
 -14   9   1 396.522 28.1847   2
   9   5   1 422.582 29.1166   3
   9   5   1 404.262 29.4951   2
  -2  11  -1 500.878 33.4534   1
  11  -9  -1 505.287 31.0746   3
  -2  11  -1 498.879 32.9324   2
  11  -9  -1 495.595 32.1256   2
  -9  -2  -1 495.815 33.7595   2
  -2  11  -1 533.384 33.9330   3
  -9  -2  -1 483.746 32.8077   3
 -11   9   1 489.842 32.4169   2
   2 -11   1 508.575 34.0715   3
   2 -11   1 508.842 33.4620   1
 -11   9   1 514.495 31.7064   3
   9   2   1 485.634 33.9935   2
   2 -11   1 543.926 33.5612   2
   9   2   1 537.205 35.5676   1
   9   2   1 487.400 33.2181   3
   1   8  -1 1017.86 64.5058   3
   8  -9  -1 1006.13 62.2745   2
   8  -9  -1 1010.17 62.7444   3
   8  -9  -1 1078.13 63.9857   1
  -9   1  -1 941.505 62.9934   3
  -9   1  -1 989.551 64.1622   2
   1   8  -1 1038.96 64.1820   2
   9  -1   1 983.183 64.7130   2
  -1  -8   1 948.798 64.9326   3
  -8   9   1 1175.84 64.4352   3
   9  -1   1 969.503 63.7043   3
  -1  -8   1 954.472 64.6480   1
  -8   9   1 1011.80 62.9058   2
  -1  -8   1 1110.30 65.0391   2
  -9   4  -1 58.2992 4.37553   3
   5  -9  -1 67.0459 5.76499   1
   5  -9  -1 63.3141 4.17813   2
   4   5  -1 54.5099 5.90014   2
   4   5  -1 52.7716 5.79075   3
  -9   4  -1 49.0442 5.36614   2
   4   5  -1 53.0472 6.23244   1
   5  -9  -1 71.2868 5.50907   3
  -4  -5   1 51.7587 5.69418   2
  -4  -5   1 49.6991 5.80212   1
   9  -4   1 57.5589 5.28023   2
   9  -4   1 56.1031 4.02463   3
  -4  -5   1 44.9609 5.30599   3
  -9   7  -1 1242.10 77.3879   2
   2  -9  -1 1218.87 78.0894   1
   7   2  -1 1240.40 78.5121   2
   2  -9  -1 1325.79 78.1856   3
   7   2  -1 1165.17 77.7563   3
   2  -9  -1 1259.73 77.1391   2
  -7  -2   1 1245.91 80.5784   2
   9  -7   1 1231.34 79.3714   2
  -2   9   1 1310.89 79.9148   2
  -2   9   1 1312.35 80.1798   3
  -1  -9  -1 317.684 22.0700   1
  -1  -9  -1 304.740 21.1631   2
  -1  -9  -1 349.616 22.0241   3
  10  -1  -1 275.788 21.5267   2
  10  -1  -1 302.666 20.6809   3
  -9  10  -1 312.738 20.2982   2
   9 -10   1 305.361 21.2591   2
   9 -10   1 381.506 21.6052   3
   1   9   1 294.273 22.0605   2
   1   9   1 308.364 22.7784   1
 -10   1   1 304.194 22.7912   2
 -10   1   1 302.696 21.5974   3
   1   9   1 322.369 22.7143   3
   9 -10   1 384.139 21.7186   3
  -4  -9  -1 1624.89 103.918   3
  -4  -9  -1 1761.39 105.351   1
  13  -4  -1 1640.70 103.654   2
  13  -4  -1 1578.32 102.007   3
   4   9   1 1687.21 111.819   1
 -13   4   1 1744.31 111.268   2
 -13   4   1 1684.92 109.320   3
   9 -13   1 1790.11 110.015   1
   4   9   1 1762.60 111.279   2
   9 -13   1 1955.35 110.659   3
  -7  -9  -1 110.018 10.8441   3
  -9  16  -1 136.068 10.9700   3
  16  -7  -1 113.111 10.3810   2
  -7  -9  -1 121.232 11.9182   1
  -7  -9  -1 132.257 11.4571   2
 -16   7   1 117.255 7.64019   3
   9 -16   1 107.217 8.26046   2
   9 -16   1 123.200 9.41833   1
   7   9   1 90.7579 9.78589   3
   9 -16   1 126.730 10.0444   3
 -16   7   1 114.606 10.0326   2
   7   9   1 113.114 10.4400   2
   9 -16   1 134.412 8.96587   2
   7   9   1 118.831 11.3956   1
 -16   7   1 87.6972 7.35434   3
 -10  -9  -1 156.772 15.9617   1
  19 -10  -1 171.268 14.1577   2
 -10  -9  -1 170.024 15.4452   2
 -10  -9  -1 186.679 15.4228   3
  -9  19  -1 182.224 12.9517   1
  -9  19  -1 183.968 15.0683   3
  10   9   1 157.561 14.2043   3
  10   9   1 187.160 16.4745   1
  10   9   1 164.713 14.6922   2
 -19  10   1 158.204 13.4762   2
   9 -19   1 162.029 13.3249   1
   9 -19   1 186.178 12.8061   2
   9 -19   1 159.565 12.0666   2
   9 -19   1 159.251 13.8179   3
  -6  16  -1 88.9677 8.55974   3
  16 -10  -1 70.8915 7.05295   2
  -6  16  -1 72.6571 6.76568   2
 -10  -6  -1 79.8378 8.43371   2
 -10  -6  -1 66.3029 7.67317   3
  -6  16  -1 79.6990 6.63427   1
 -16  10   1 61.0812 6.51995   2
  10   6   1 63.9427 7.62014   2
   6 -16   1 66.8675 7.49279   3
  10   6   1 66.3371 7.33216   3
   6 -16   1 80.5038 6.87301   2
   6 -16   1 84.5145 7.36330   1
  10   6   1 70.5658 8.92555   1
 -10  -3  -1 6.93677 2.30833   3
  -3  13  -1 5.56351 1.97078   2
 -10  -3  -1 8.48356 2.89993   2
  -3  13  -1 5.36270 2.34033   3
  13 -10  -1 11.8587 2.38575   2
  10   3   1 3.13667 1.98986   2
  10   3   1 3.21151 2.58342   1
   3 -13   1 5.65635 2.41397   3
   3 -13   1 3.53211 1.89763   2
   3 -13   1 7.25994 2.32322   1
 -13  10   1 6.04033 1.74544   2
 -10   0  -1 -0.8613 1.00558   3
  10 -10  -1 0.72157 0.79524   2
   0  10  -1 1.93807 1.48675   3
   0  10  -1 -0.1796 1.26232   2
   0  10  -1 1.00090 1.22652   1
  10 -10  -1 1.84578 0.89752   3
 -10   0  -1 1.79291 1.65787   2
 -10  10   1 1.68740 0.85514   2
  10   0   1 -0.5982 0.99410   3
 -10  10   1 1.52634 0.95409   3
   0 -10   1 0.05508 1.18525   1
   0 -10   1 -0.7877 1.08162   2
  10   0   1 3.24713 1.87620   2
   0 -10   1 1.56971 1.70631   3
   7 -10  -1 27.0569 3.52759   1
   3   7  -1 22.2561 3.69039   3
   7 -10  -1 23.3727 2.91120   3
   7 -10  -1 17.2675 1.81800   2
   7 -10  -1 22.0651 1.74131   2
   3   7  -1 20.3590 3.67575   2
 -10   3  -1 29.6274 2.65701   3
 -10   3  -1 25.6149 3.56394   2
  -3  -7   1 19.3255 3.78089   1
  10  -3   1 30.9627 3.94774   3
  -3  -7   1 17.6584 3.62589   3
  -7  10   1 26.2337 3.17946   3
  10  -3   1 24.4404 3.62440   2
  -3  -7   1 22.9008 3.88831   2
  -7  10   1 26.5733 3.47792   1
 -10   6  -1 6.72598 2.06842   2
 -10   6  -1 10.5938 1.32613   3
   4 -10  -1 8.90032 2.37332   1
   6   4  -1 8.38223 2.67116   2
   4 -10  -1 6.43188 1.85147   3
   6   4  -1 11.6858 3.55694   1
   6   4  -1 8.41454 2.75951   3
   4 -10  -1 9.00132 1.59079   2
  -4  10   1 6.51424 1.97051   3
  -6  -4   1 4.62984 1.97595   3
  10  -6   1 6.14386 1.82593   2
  10  -6   1 8.34581 1.15416   3
  -4  10   1 6.58007 1.43000   2
  -6  -4   1 5.64665 2.33151   2
   1 -10  -1 374.288 22.6670   3
   1 -10  -1 359.340 22.7395   1
   9   1  -1 301.162 21.5979   3
   1 -10  -1 306.758 21.3920   2
 -10   9  -1 284.935 21.0353   2
  10  -9   1 293.447 21.3868   2
  10  -9   1 316.816 20.8927   3
  -9  -1   1 307.895 21.9762   3
  -1  10   1 388.237 23.0853   3
  -9  -1   1 339.891 23.1771   2
  10  -9   1 315.539 20.9847   3
  -1  10   1 350.022 21.9901   2
  -2 -10  -1 144.475 12.2235   1
  -2 -10  -1 136.461 11.3319   2
  12  -2  -1 132.869 10.4863   3
  -2 -10  -1 147.416 11.9330   3
  12  -2  -1 141.144 11.7565   2
 -10  12  -1 155.644 10.2840   2
  10 -12   1 164.184 11.2754   3
 -12   2   1 142.316 12.4011   2
  10 -12   1 157.300 10.7979   2
   2  10   1 154.616 12.0637   2
 -12   2   1 138.521 10.9543   3
  10 -12   1 170.868 11.2284   3
   2  10   1 133.245 12.1990   1
   2  10   1 151.566 12.4089   3
 -10  15  -1 27.6627 4.20983   3
  -5 -10  -1 30.0757 5.32227   1
  -5 -10  -1 29.5226 4.92757   3
 -10  15  -1 30.2776 3.34773   2
  -5 -10  -1 24.2555 4.51371   2
  15  -5  -1 30.6197 4.59547   2
  10 -15   1 23.7194 2.80144   2
  10 -15   1 18.2763 3.47325   3
   5  10   1 26.1080 4.87666   1
   5  10   1 22.9874 4.15831   2
 -15   5   1 23.0741 2.83328   3
   5  10   1 28.7997 4.64100   3
 -15   5   1 19.9121 4.45923   2
 -15   5   1 26.6291 2.97986   3
  10 -15   1 22.1602 3.35519   1
  18  -8  -1 432.257 31.8330   2
 -10  18  -1 561.936 33.0395   3
  -8 -10  -1 425.216 32.4985   3
  -8 -10  -1 423.374 33.6281   1
  -8 -10  -1 482.000 33.1206   2
 -18   8   1 415.074 28.7520   3
  10 -18   1 480.557 29.9334   2
   8  10   1 477.866 33.9591   1
  10 -18   1 481.314 31.2087   1
   8  10   1 423.711 32.2587   2
 -18   8   1 402.556 31.4659   2
  10 -18   1 515.949 30.4940   2
  10 -18   1 494.694 31.8151   3
 -18   8   1 464.345 28.8926   3
 -11 -10  -1 283.616 23.5729   1
 -11 -10  -1 269.312 22.2729   2
 -11 -10  -1 240.814 21.4412   3
 -10  21  -1 295.187 21.9290   3
  21 -11  -1 286.184 20.9278   2
  11  10   1 297.397 24.1359   1
  10 -21   1 265.019 19.1120   2
 -21  11   1 271.217 20.9416   2
  10 -21   1 337.829 20.1709   2
  10 -21   1 281.677 20.9128   1
  11  10   1 241.906 21.4801   3
  10 -21   1 267.969 21.2090   3
  11  10   1 274.118 22.2262   2
  -7  18  -1 483.978 31.1369   1
  -7  18  -1 552.739 33.9974   3
 -11  -7  -1 474.801 33.7295   2
  18 -11  -1 428.579 31.7391   2
 -11  -7  -1 436.255 32.7478   3
  11   7   1 404.070 30.7613   2
   7 -18   1 465.661 30.7622   3
   7 -18   1 481.730 29.0188   2
   7 -18   1 482.340 29.4290   2
  11   7   1 364.553 29.9177   3
 -18  11   1 391.316 29.5878   2
   7 -18   1 443.472 29.9005   1
  11   7   1 417.204 32.3682   1
 -11  -4  -1 554.671 36.7907   3
  -4  15  -1 561.613 37.5636   3
  -4  15  -1 514.885 35.6258   1
  -4  15  -1 577.134 36.2427   2
 -11  -4  -1 560.545 37.8065   2
  15 -11  -1 533.367 35.7646   2
 -15  11   1 504.849 34.1605   2
  11   4   1 472.500 34.9597   3
   4 -15   1 526.008 35.1601   1
   4 -15   1 528.769 35.8647   3
   4 -15   1 581.970 35.0503   2
  11   4   1 558.755 37.8681   1
  11   4   1 511.886 35.9362   2
  -1  12  -1 232.716 16.4320   2
 -11  -1  -1 215.433 16.9956   2
  -1  12  -1 234.880 16.2400   1
 -11  -1  -1 197.104 15.7184   3
  -1  12  -1 230.737 17.2309   3
  12 -11  -1 224.045 15.0524   2
  12 -11  -1 227.078 14.4601   3
 -12  11   1 241.457 15.3174   3
   1 -12   1 232.458 17.6649   3
   1 -12   1 243.611 17.1517   2
  11   1   1 220.930 16.4468   3
 -12  11   1 229.870 15.5327   2
  11   1   1 251.172 19.1689   1
  11   1   1 224.431 17.4921   2
   1 -12   1 222.857 17.1189   1
 -11   2  -1 475.952 32.4355   3
   9 -11  -1 521.904 32.4979   3
   9 -11  -1 497.178 31.6089   2
 -11   2  -1 509.397 33.9665   2
   9 -11  -1 540.157 33.6533   1
   2   9  -1 515.507 34.0029   2
  -2  -9   1 519.138 34.0347   3
  -9  11   1 497.682 31.2540   2
  -2  -9   1 527.608 33.8119   2
  -2  -9   1 464.393 33.6070   1
  11  -2   1 487.440 32.2042   3
  -9  11   1 549.923 32.4552   3
  11  -2   1 472.211 33.3959   2
   6 -11  -1 174.965 12.2890   3
   6 -11  -1 187.817 12.8451   1
   5   6  -1 149.564 12.8951   2
   5   6  -1 165.419 13.6227   1
   5   6  -1 157.528 12.8787   3
 -11   5  -1 153.085 12.3765   2
   6 -11  -1 173.103 10.8926   2
 -11   5  -1 166.191 10.9912   3
   6 -11  -1 168.202 10.8004   2
  -5  -6   1 161.245 13.4053   3
  11  -5   1 187.386 13.1804   2
  -6  11   1 193.828 13.0517   3
  -6  11   1 183.000 12.9372   1
  -5  -6   1 178.145 14.1623   1
  -5  -6   1 166.376 13.6617   2
  11  -5   1 165.730 11.4971   3
 -11   8  -1 978.083 55.3323   3
   8   3  -1 895.725 58.8107   1
   8   3  -1 806.315 57.5009   2
   3 -11  -1 904.891 57.3403   1
   3 -11  -1 992.035 57.4909   3
   3 -11  -1 959.107 56.1696   2
 -11   8  -1 818.837 56.3676   2
   8   3  -1 779.125 56.8482   3
  -8  -3   1 789.526 55.9402   3
  -8  -3   1 842.945 56.8292   2
  11  -8   1 870.430 54.1540   3
  11  -8   1 795.610 55.3503   2
  -3  11   1 1000.62 55.3524   2
  -3  11   1 969.323 56.5586   3
   0 -11  -1 0.60173 1.59682   3
  11   0  -1 -0.2548 1.17920   2
 -11  11  -1 0.75446 1.06054   2
   0 -11  -1 4.03889 2.09317   1
   0 -11  -1 -0.0130 1.26082   2
  11   0  -1 0.05550 1.03382   3
 -11   0   1 -0.1302 1.25036   3
  11 -11   1 0.81965 0.88995   3
  11 -11   1 0.95764 1.03297   3
   0  11   1 3.02936 1.50989   2
   0  11   1 0.62103 1.47265   3
  11 -11   1 0.38032 0.99818   2
  -3 -11  -1 269.989 19.1033   2
  14  -3  -1 236.361 18.8974   2
  14  -3  -1 232.575 17.4109   3
  -3 -11  -1 280.848 19.5898   3
  -3 -11  -1 255.525 19.8898   1
 -11  14  -1 267.890 17.2077   2
  11 -14   1 260.030 18.1142   2
 -14   3   1 260.236 18.4289   3
  11 -14   1 288.304 18.8229   3
   3  11   1 270.755 20.5209   1
   3  11   1 260.171 19.7661   2
 -14   3   1 253.609 20.0801   2
   3  11   1 268.072 20.2742   3
  11 -14   1 311.336 19.0695   3
  11 -14   1 275.636 18.8564   1
 -11  17  -1 525.863 31.3296   3
  -6 -11  -1 415.958 31.3266   3
  17  -6  -1 393.987 30.7160   2
  -6 -11  -1 450.208 31.5781   2
  -6 -11  -1 449.199 32.6679   1
 -17   6   1 412.215 31.0489   2
  11 -17   1 489.095 30.6462   3
  11 -17   1 482.283 29.3793   2
  11 -17   1 450.707 29.0014   2
 -17   6   1 400.847 28.5564   3
   6  11   1 434.073 32.3272   1
   6  11   1 422.442 31.4970   3
   6  11   1 440.829 31.4839   2
  11 -17   1 486.645 30.2766   1
 -17   6   1 461.190 28.9195   3
  20  -9  -1 342.234 26.1688   2
  -9 -11  -1 368.594 27.4485   2
 -11  20  -1 398.219 27.1765   3
  -9 -11  -1 351.186 27.1316   3
 -20   9   1 354.854 22.6711   3
   9  11   1 347.947 28.1695   1
 -20   9   1 340.787 22.6349   3
   9  11   1 297.370 26.1487   3
  11 -20   1 407.523 24.5920   2
   9  11   1 358.004 26.9498   2
  11 -20   1 395.868 26.1788   3
 -20   9   1 349.844 26.1057   2
  11 -20   1 392.361 25.6956   1
  11 -20   1 366.193 23.9217   2
 -12 -11  -1 3392.01 206.768   2
  23 -12  -1 3058.01 206.126   2
 -12 -11  -1 3299.59 205.959   3
 -11  23  -1 3682.97 206.417   3
 -12 -11  -1 2947.67 207.272   1
  11 -23   1 3288.46 208.761   2
  11 -23   1 3319.06 210.898   1
 -23  12   1 3278.94 210.955   2
  11 -23   1 3400.86 211.512   3
  11 -23   1 3755.89 209.628   2
  12  11   1 3237.23 214.240   1
  20 -12  -1 34.0176 5.25046   2
 -12  -8  -1 40.0792 6.36606   3
  -8  20  -1 45.4924 7.80191   3
 -12  -8  -1 39.5330 6.81610   2
  -8  20  -1 51.1465 5.03004   1
  12   8   1 48.9107 8.01250   1
 -20  12   1 37.1720 5.36448   2
   8 -20   1 44.7700 6.45380   3
   8 -20   1 46.1009 5.25925   2
   8 -20   1 45.5993 4.92399   2
  12   8   1 46.8282 6.84407   2
   8 -20   1 39.7718 5.72740   1
  12   8   1 37.3110 6.16195   3
  -5  17  -1 252.334 17.8123   2
  17 -12  -1 246.325 17.6868   2
 -12  -5  -1 234.600 18.5324   3
  -5  17  -1 239.276 17.3414   1
 -12  -5  -1 239.030 19.5092   2
  -5  17  -1 268.993 19.6463   3
   5 -17   1 268.740 19.7873   3
  12   5   1 257.560 21.4953   1
 -17  12   1 245.073 18.0434   2
  12   5   1 243.530 19.0348   3
   5 -17   1 258.113 18.4974   2
  12   5   1 260.412 25.3405   2
   5 -17   1 256.717 19.0577   1
  14 -12  -1 288.876 18.4633   3
 -12  -2  -1 303.285 22.0107   2
  14 -12  -1 296.262 19.7006   2
  -2  14  -1 305.714 20.8358   2
  -2  14  -1 295.520 21.8385   3
  -2  14  -1 272.486 20.4024   1
 -12  -2  -1 291.531 20.6541   3
   2 -14   1 302.653 21.7379   1
  12   2   1 303.042 22.2534   2
  12   2   1 285.584 21.0731   3
   2 -14   1 300.573 22.2168   3
   2 -14   1 324.029 21.5977   2
  12   2   1 298.538 23.6747   1
 -14  12   1 297.798 20.0886   2
   1  11  -1 239.014 17.3209   3
  11 -12  -1 225.963 14.9339   3
  11 -12  -1 240.987 16.5286   1
  11 -12  -1 216.593 14.5230   2
   1  11  -1 228.016 16.6587   2
   1  11  -1 209.478 16.6451   1
 -12   1  -1 207.739 15.4179   3
 -12   1  -1 220.363 16.9023   2
 -11  12   1 258.655 15.9692   3
  12  -1   1 221.375 16.1101   3
  -1 -11   1 212.934 17.0969   2
 -11  12   1 238.362 15.1790   2
  -1 -11   1 231.922 17.4975   1
  12  -1   1 227.426 17.4300   2
  -1 -11   1 227.145 17.6828   3
   8 -12  -1 20.7255 3.38979   1
 -12   4  -1 17.6872 2.26032   3
   4   8  -1 12.0616 2.99426   3
   4   8  -1 19.3635 4.94313   1
   8 -12  -1 17.5545 1.74130   2
   8 -12  -1 19.3764 2.91415   3
 -12   4  -1 20.7680 3.52371   2
   4   8  -1 25.0791 4.03040   2
   8 -12  -1 19.3426 1.62715   2
  12  -4   1 18.7725 2.52756   3
  -4  -8   1 21.7035 4.09572   3
  -4  -8   1 21.7322 4.09655   1
  -8  12   1 19.5458 3.27687   1
  -4  -8   1 22.2169 4.50237   2
  -8  12   1 23.1975 3.24634   3
  12  -4   1 18.5987 3.48238   2
   7   5  -1 3.45315 1.95600   1
   5 -12  -1 2.95706 1.83041   1
   7   5  -1 6.65456 2.37696   3
   7   5  -1 2.75919 2.01638   2
 -12   7  -1 11.0309 1.32965   3
   5 -12  -1 6.48030 2.05282   3
   5 -12  -1 5.99137 1.44425   2
  -5  12   1 5.78810 1.96845   1
  -5  12   1 8.15618 2.34595   3
  -7  -5   1 2.55576 2.34725   2
  -7  -5   1 1.69874 1.91585   3
  -5  12   1 5.63569 1.38496   2
   2 -12  -1 147.157 12.1363   1
  10   2  -1 150.487 12.4954   2
   2 -12  -1 156.274 11.1699   2
  10   2  -1 151.717 11.6901   3
 -12  10  -1 140.211 10.9090   2
  12 -10   1 144.959 11.2775   2
 -10  -2   1 161.754 13.1559   2
  12 -10   1 169.180 10.4202   3
  12 -10   1 151.688 10.4444   3
 -10  -2   1 142.701 11.8940   3
  -2  12   1 160.996 12.5709   3
  -2  12   1 146.870 11.3863   2
  -1 -12  -1 1082.37 68.4139   2
  13  -1  -1 1052.43 69.1569   2
  -1 -12  -1 1125.59 69.3122   3
 -12  13  -1 1069.11 67.0783   2
  -1 -12  -1 1074.75 69.4876   1
  13  -1  -1 1030.03 67.6610   3
 -13   1   1 1075.06 71.6511   2
   1  12   1 1169.53 71.7070   3
  12 -13   1 1046.90 69.3630   2
 -13   1   1 1084.63 70.0186   3
   1  12   1 1087.96 70.7113   2
  12 -13   1 1158.43 69.5630   3
  12 -13   1 1088.84 69.3989   3
   1  12   1 1188.65 73.0349   1
  -4 -12  -1 88.6563 8.96388   3
 -12  16  -1 84.6175 6.63395   2
  -4 -12  -1 68.8126 8.08874   2
  16  -4  -1 85.3692 8.57680   2
  -4 -12  -1 97.1999 9.69547   1
  16  -4  -1 73.1290 6.85150   3
  12 -16   1 90.2790 7.73497   1
   4  12   1 96.9176 9.60966   1
 -16   4   1 92.2872 9.13578   2
  12 -16   1 90.0665 7.79140   3
 -16   4   1 76.8570 6.97319   3
  12 -16   1 84.9696 6.85386   2
  12 -16   1 82.6272 7.50988   3
   4  12   1 91.3028 8.81420   2
  -7 -12  -1 837.533 56.2462   2
 -12  19  -1 960.977 55.9348   3
  -7 -12  -1 779.909 57.0885   1
  19  -7  -1 796.494 55.5042   2
  -7 -12  -1 825.400 56.2649   3
   7  12   1 804.747 55.7065   1
  12 -19   1 846.721 53.4375   3
  12 -19   1 772.881 52.8597   1
  12 -19   1 846.092 51.9532   2
 -19   7   1 801.063 51.2821   3
 -19   7   1 796.233 51.1068   3
   7  12   1 800.300 60.2510   2
 -19   7   1 819.744 54.3701   2
   7  12   1 885.375 55.1408   3
  12 -19   1 805.825 51.5812   2
 -10 -12  -1 64.6632 9.45432   3
  22 -10  -1 63.7136 14.6276   2
 -10 -12  -1 81.1371 10.0222   2
 -10 -12  -1 68.1246 10.1430   1
 -12  22  -1 98.1358 9.88715   3
  12 -22   1 80.8142 6.85496   2
  12 -22   1 103.830 7.74813   2
 -22  10   1 73.8282 5.39965   3
  12 -22   1 86.6368 8.97520   3
  12 -22   1 80.2733 8.53471   1
 -22  10   1 79.3768 8.97794   2
  10  12   1 62.0165 9.03522   3
  10  12   1 73.3747 9.49484   2
  10  12   1 93.2452 11.1851   1
  25 -13  -1 518.139 40.2017   2
 -13 -12  -1 546.018 41.6410   3
 -13 -12  -1 597.667 42.6950   2
 -12  25  -1 702.997 42.9044   3
  12 -25   1 669.273 43.4354   3
  13  12   1 622.060 46.1838   1
  12 -25   1 597.584 40.1604   2
 -25  13   1 593.445 42.6422   2
  12 -25   1 645.522 40.8882   2
  12 -25   1 596.148 42.5437   1
 -13  -9  -1 2467.26 157.160   2
 -13  -9  -1 2183.36 155.689   3
  -9  22  -1 2643.72 153.629   1
  22 -13  -1 2250.16 154.655   2
  -9  22  -1 2830.20 157.336   3
   9 -22   1 2525.53 155.727   2
  13   9   1 2634.34 164.893   2
   9 -22   1 2579.51 158.279   3
   9 -22   1 2747.35 156.488   2
   9 -22   1 2400.18 157.352   1
 -22  13   1 2270.46 156.858   2
  13   9   1 2427.84 160.820   1
  -6  19  -1 80.3676 7.36454   1
  19 -13  -1 80.8893 7.78199   2
  -6  19  -1 86.3169 7.76649   2
 -13  -6  -1 87.9835 8.96827   3
  -6  19  -1 92.7859 13.7339   3
 -13  -6  -1 68.3484 9.14122   2
  13   6   1 56.5454 9.12854   1
   6 -19   1 74.6055 8.45965   3
 -19  13   1 72.4576 7.21251   2
   6 -19   1 75.4180 8.06803   1
  13   6   1 75.7024 8.20211   3
  13   6   1 88.8205 9.37482   2
   6 -19   1 79.6089 7.45158   2
  -3  16  -1 208.169 15.7095   1
  -3  16  -1 222.175 16.1511   2
  16 -13  -1 220.199 13.4076   3
 -13  -3  -1 205.119 16.1649   3
 -13  -3  -1 199.355 17.2079   2
  16 -13  -1 215.261 13.4748   3
  16 -13  -1 184.806 14.9669   2
  -3  16  -1 253.667 17.8922   3
  13   3   1 204.988 17.9637   1
  13   3   1 185.153 16.3491   2
   3 -16   1 237.334 16.8121   3
  13   3   1 183.858 15.1562   3
 -16  13   1 171.564 13.9134   2
   3 -16   1 195.853 15.2443   2
   3 -16   1 235.159 16.2433   1
   0  13  -1 2.00668 1.89384   3
 -13   0  -1 -0.2469 1.58009   2
  13 -13  -1 2.40851 1.01516   3
  13 -13  -1 0.48677 0.81754   2
   0  13  -1 -0.7466 1.05349   1
 -13   0  -1 1.77123 1.21895   3
   0  13  -1 -1.9065 0.83122   2
   0 -13   1 -1.3678 1.03884   3
  13   0   1 -0.2221 0.92929   3
 -13  13   1 -0.0575 0.89228   3
   0 -13   1 -0.4463 1.29648   1
  13   0   1 -0.2153 1.37496   2
 -13  13   1 0.44982 0.82162   2
   0 -13   1 -0.7046 1.35439   2
  10 -13  -1 10.2262 1.27635   2
   3  10  -1 6.49437 2.64212   3
  10 -13  -1 15.6047 2.46670   3
  10 -13  -1 6.61989 2.29469   1
 -13   3  -1 11.9810 2.17533   3
 -13   3  -1 1.99527 1.86687   2
   3  10  -1 7.37936 2.56122   2
  13  -3   1 4.80763 1.58381   3
  -3 -10   1 0.62347 1.49294   3
  -3 -10   1 2.64379 1.99394   2
  13  -3   1 3.68565 2.03196   2
 -10  13   1 6.74811 1.10242   2
  -3 -10   1 3.11577 2.05199   1
 -13   6  -1 411.621 27.8227   3
   6   7  -1 399.391 30.8262   1
   7 -13  -1 516.505 29.8113   3
   7 -13  -1 502.814 30.1504   1
   7 -13  -1 517.078 27.9848   2
   6   7  -1 404.177 30.3066   2
 -13   6  -1 386.120 29.5028   2
   6   7  -1 377.187 29.9563   3
   7 -13  -1 445.775 27.7505   2
  -6  -7   1 385.721 27.2076   2
  13  -6   1 359.909 24.4228   2
  13  -6   1 356.198 22.5068   3
  -6  -7   1 335.898 26.2201   1
  -6  -7   1 333.529 28.3583   3
   9   4  -1 1813.82 113.195   1
   4 -13  -1 1838.59 109.757   2
   9   4  -1 1584.91 111.414   2
   4 -13  -1 1867.83 111.351   3
   9   4  -1 1727.64 111.083   3
   4 -13  -1 1783.84 111.204   1
  -9  -4   1 1756.01 114.235   2
  -4  13   1 1977.42 112.172   2
  -4  13   1 1714.55 112.890   1
  13  -9   1 1721.61 112.570   2
  -4  13   1 1861.98 113.605   3
 -13  12  -1 1086.46 66.7783   2
  12   1  -1 989.281 67.2930   3
   1 -13  -1 1134.20 68.6342   3
   1 -13  -1 1127.05 67.5032   2
  12   1  -1 1014.55 68.5262   2
   1 -13  -1 1013.01 68.4167   1
 -12  -1   1 1090.47 70.4583   2
  13 -12   1 1054.99 68.1610   2
 -12  -1   1 1031.45 68.7940   3
  -1  13   1 1100.05 68.8592   2
  13 -12   1 1133.87 67.5314   3
  -1  13   1 1094.52 69.9356   3
  -2 -13  -1 18.9311 4.70025   2
  15  -2  -1 25.1771 4.61225   2
  15  -2  -1 25.5385 3.81370   3
  13 -15   1 29.3769 3.35684   2
 -15   2   1 23.3920 3.78600   3
 -13  18  -1 1.87940 1.22998   2
  -5 -13  -1 4.43638 2.29902   3
  18  -5  -1 0.37357 1.74041   2
  -5 -13  -1 0.88667 2.21603   1
  -5 -13  -1 7.29020 3.19477   2
  13 -18   1 1.72189 1.61758   3
   5  13   1 4.54971 2.22385   3
   5  13   1 3.27120 2.30213   2
   5  13   1 4.50779 2.97800   1
  13 -18   1 2.59781 1.31428   2
  13 -18   1 5.04840 2.19592   3
  13 -18   1 2.08539 1.46711   1
 -18   5   1 4.06742 2.42091   2
 -18   5   1 3.43820 1.47082   3
  -8 -13  -1 888.186 58.6540   2
  -8 -13  -1 804.304 59.6068   1
  21  -8  -1 841.843 57.7830   2
  -8 -13  -1 944.533 59.1441   3
  13 -21   1 1058.93 60.6701   3
  13 -21   1 1034.71 60.3352   1
 -21   8   1 863.406 57.5039   3
 -21   8   1 904.875 57.7131   3
  13 -21   1 941.572 58.2336   2
   8  13   1 847.857 61.1955   2
   8  13   1 883.331 62.7383   1
   8  13   1 897.265 61.6788   3
 -21   8   1 878.775 60.9862   2
 -11 -13  -1 2678.08 156.419   2
 -11 -13  -1 2309.81 157.219   1
 -11 -13  -1 2460.64 155.591   3
  24 -11  -1 2337.11 154.166   2
  13 -24   1 2675.58 171.884   2
  13 -24   1 2830.98 174.743   3
 -24  11   1 2656.91 174.811   2
  11  13   1 2639.89 177.624   1
  13 -24   1 2828.81 174.441   1
  13 -24   1 3037.38 172.676   2
  27 -14  -1 619.506 43.8091   2
 -14 -13  -1 588.237 44.9015   3
 -14 -13  -1 704.340 46.7757   2
  13 -27   1 651.629 44.4605   1
  13 -27   1 614.439 41.4072   2
  13 -27   1 690.328 42.2269   2
  13 -27   1 581.335 44.1414   3
  14  13   1 693.813 48.8372   1
 -27  14   1 616.467 44.2590   2
 -10  24  -1 74.3498 6.77337   1
 -14 -10  -1 46.7127 8.54580   3
  24 -14  -1 64.6024 7.84257   2
 -10  24  -1 84.4004 9.80210   3
 -14 -10  -1 55.0919 9.41291   2
  10 -24   1 84.0678 9.03895   1
  10 -24   1 72.0088 9.13289   3
  10 -24   1 66.8056 6.73615   2
  10 -24   1 87.2523 7.77600   2
 -24  14   1 49.1017 7.60456   2
  14  10   1 77.9819 11.3471   1
  -7  21  -1 219.967 16.5101   2
 -14  -7  -1 205.195 17.8744   3
 -14  -7  -1 249.301 19.6870   2
  21 -14  -1 207.240 16.7416   2
  -7  21  -1 213.507 16.1325   1
  -7  21  -1 258.884 19.3922   3
  14   7   1 192.907 18.4298   2
   7 -21   1 252.932 17.2914   2
   7 -21   1 220.426 17.8671   1
 -21  14   1 227.808 17.0500   2
  14   7   1 217.152 18.1473   3
   7 -21   1 226.983 18.4621   3
  14   7   1 223.631 20.4150   1
 -14  -4  -1 79.9997 9.65821   2
  -4  18  -1 107.729 10.3632   3
  -4  18  -1 81.1654 8.02666   1
 -14  -4  -1 88.2523 8.85999   3
  18 -14  -1 87.8503 7.88294   2
  -4  18  -1 95.4887 8.50575   2
   4 -18   1 86.1588 9.38353   3
  14   4   1 112.364 14.7245   1
 -18  14   1 80.1198 7.43017   2
   4 -18   1 84.7883 8.95299   1
  14   4   1 88.3468 9.46059   2
   4 -18   1 77.8538 8.10214   2
  14   4   1 89.9292 8.75449   3
  15 -14  -1 283.379 19.0865   2
  -1  15  -1 277.743 21.6158   3
  -1  15  -1 276.181 20.5946   2
  15 -14  -1 290.798 18.3710   3
 -14  -1  -1 279.060 20.4219   3
 -14  -1  -1 288.907 21.8274   2
 -15  14   1 298.718 20.4736   2
  14   1   1 315.979 24.8559   1
   1 -15   1 291.804 22.9290   3
 -15  14   1 358.974 21.5495   3
  14   1   1 301.819 21.7368   3
  14   1   1 292.442 22.8653   2
   1 -15   1 279.562 22.5101   1
   1 -15   1 326.422 22.5334   2
  12 -14  -1 290.708 18.9304   3
  12 -14  -1 289.643 18.1328   2
  12 -14  -1 295.151 20.3294   1
   2  12  -1 230.806 20.3655   1
 -14   2  -1 294.371 21.1049   2
 -14   2  -1 275.924 19.1425   3
   2  12  -1 289.253 20.7641   2
   2  12  -1 279.711 21.1516   3
 -12  14   1 314.282 20.3669   3
  -2 -12   1 315.932 22.4375   1
  -2 -12   1 301.123 22.2908   3
  14  -2   1 284.489 20.2843   3
  14  -2   1 311.815 22.1048   2
  -2 -12   1 251.195 23.6088   2
 -12  14   1 302.086 19.1667   2
   5   9  -1 412.980 30.3067   3
   9 -14  -1 440.855 29.6771   1
   9 -14  -1 449.106 27.3835   2
 -14   5  -1 456.570 31.4605   2
   5   9  -1 410.529 30.2198   2
   9 -14  -1 481.125 29.2702   3
 -14   5  -1 430.183 27.9088   3
   5   9  -1 416.270 30.6491   1
   9 -14  -1 432.510 27.2533   2
  -5  -9   1 406.373 28.3278   3
  14  -5   1 392.747 25.8003   3
  -5  -9   1 432.961 28.6100   2
  -5  -9   1 370.105 28.5333   1
  14  -5   1 414.655 27.7880   2
   8   6  -1 33.0600 5.53235   2
   6 -14  -1 35.5048 5.19820   1
 -14   8  -1 47.8339 5.32893   2
   6 -14  -1 64.3655 5.94070   3
 -14   8  -1 52.5583 3.58803   3
   6 -14  -1 44.3840 4.13445   2
  14  -8   1 52.6932 3.67112   3
  14  -8   1 47.5188 5.38421   2
  -8  -6   1 36.6418 5.94047   2
  -6  14   1 41.2902 5.14043   1
  -8  -6   1 40.8952 5.89149   3
  -6  14   1 66.7098 6.23048   3
  -6  14   1 51.7514 5.93639   2
   3 -14  -1 301.953 19.3217   3
   3 -14  -1 257.750 17.5253   2
  11   3  -1 223.896 18.1002   3
  11   3  -1 243.136 19.1494   2
   3 -14  -1 256.832 18.8993   1
  11   3  -1 222.621 19.9697   1
 -14  11  -1 251.281 17.6054   2
  -3  14   1 274.959 18.6948   2
  -3  14   1 314.122 20.4321   3
  -3  14   1 258.350 19.3425   1
 -11  -3   1 248.872 19.3721   3
  14 -11   1 267.017 17.2932   3
  14 -11   1 279.430 17.2217   3
  14 -11   1 247.482 18.5913   2
 -11  -3   1 271.379 20.6843   2
 -14  14  -1 2.76026 1.31969   2
   0 -14  -1 0.69419 1.78537   1
   0 -14  -1 0.69582 1.44146   3
   0 -14  -1 0.48282 1.20867   2
  14   0  -1 -1.3223 1.00222   3
  14   0  -1 1.26655 1.98320   2
 -14   0   1 1.72124 1.43520   3
  14 -14   1 0.85833 1.06296   3
   0  14   1 2.24662 1.79935   3
  14 -14   1 4.32860 1.30093   3
 -14   0   1 -1.1854 1.48774   2
  14 -14   1 0.89030 1.17543   2
   0  14   1 1.49895 1.73914   2
  17  -3  -1 127.381 12.4703   2
  17  -3  -1 115.763 10.7943   3
 -14  17  -1 167.643 10.6860   2
  -3 -14  -1 136.931 12.3384   2
  -3 -14  -1 161.102 13.3536   3
  -3 -14  -1 138.723 16.9109   1
   3  14   1 152.991 13.3412   2
   3  14   1 142.827 13.7591   1
  14 -17   1 176.421 12.2183   3
 -17   3   1 134.719 11.7564   3
  14 -17   1 175.406 12.6937   1
  14 -17   1 147.042 11.4144   2
 -17   3   1 149.322 13.8594   2
  14 -17   1 191.055 12.4591   3
  -6 -14  -1 43.0588 6.39720   2
  -6 -14  -1 52.4212 7.71446   1
  -6 -14  -1 31.1470 6.02058   3
  20  -6  -1 35.3060 5.84242   2
  14 -20   1 41.4442 5.02960   3
 -20   6   1 31.6949 3.89298   3
 -20   6   1 27.4791 3.68748   3
  14 -20   1 35.8390 5.05438   1
 -20   6   1 32.8137 5.98740   2
   6  14   1 42.1623 6.22833   2
   6  14   1 37.5006 6.80834   1
  14 -20   1 44.2442 5.32032   3
  14 -20   1 37.2039 4.06555   2
   6  14   1 32.3134 5.74970   3
  14 -20   1 37.4298 3.85435   2
  -9 -14  -1 784.607 58.1159   1
  -9 -14  -1 786.151 56.5239   3
  23  -9  -1 797.822 55.6260   2
  -9 -14  -1 879.025 57.0697   2
 -14  23  -1 897.971 56.1094   3
  14 -23   1 895.143 53.0214   2
 -23   9   1 883.547 52.3796   3
   9  14   1 816.425 57.8760   1
  14 -23   1 821.188 54.7267   3
 -23   9   1 791.962 55.5761   2
   9  14   1 805.438 56.1357   2
 -23   9   1 805.657 51.6525   3
  14 -23   1 752.694 54.2420   1
  14 -23   1 843.461 52.4946   2
 -14  26  -1 441.465 28.9556   3
 -12 -14  -1 323.232 27.9055   3
 -12 -14  -1 321.717 29.5235   1
 -12 -14  -1 355.549 28.6824   2
  14 -26   1 344.340 27.0196   1
  12  14   1 339.851 30.0952   1
 -26  12   1 353.449 27.5972   2
  14 -26   1 406.220 27.8786   3
  14 -26   1 391.643 25.2692   2
  14 -26   1 358.241 24.5997   2
 -15 -14  -1 67.9837 9.97869   3
 -15 -14  -1 70.2796 10.6433   2
  14 -29   1 84.8048 10.1717   3
  14 -29   1 74.3285 9.73996   1
  15  14   1 67.0101 11.6728   1
  14 -29   1 95.7961 8.03222   2
 -29  15   1 70.5434 9.50250   2
  14 -29   1 82.3558 7.35924   2
 -11  26  -1 439.364 27.6794   1
  26 -15  -1 361.665 29.0929   2
 -15 -11  -1 420.199 32.0639   2
 -15 -11  -1 388.316 30.6796   3
  11 -26   1 427.624 30.8420   3
  11 -26   1 364.567 29.7385   1
  15  11   1 392.106 33.3497   1
  11 -26   1 417.897 27.8154   2
 -26  15   1 402.156 29.7223   2
  11 -26   1 442.361 28.5389   2
  23 -15  -1 229.632 18.6159   2
 -15  -8  -1 241.610 21.1600   2
  -8  23  -1 282.547 21.3310   3
 -15  -8  -1 254.336 20.2921   3
  -8  23  -1 239.262 17.8241   1
   8 -23   1 263.690 19.1392   2
   8 -23   1 243.145 18.5297   2
 -23  15   1 251.128 19.2890   2
   8 -23   1 268.223 20.5082   1
  15   8   1 256.484 23.2002   1
   8 -23   1 257.401 20.9237   3
  15   8   1 257.792 20.7597   3
 -15  -5  -1 115.737 11.2552   3
 -15  -5  -1 111.688 12.2186   2
  -5  20  -1 135.399 10.8636   2
  -5  20  -1 116.866 10.2547   1
  20 -15  -1 124.449 10.3255   2
 -20  15   1 118.726 10.2947   2
  15   5   1 117.140 11.6248   3
  15   5   1 124.735 12.4720   2
   5 -20   1 144.277 12.7104   3
   5 -20   1 141.926 12.2451   1
  15   5   1 123.317 13.8894   1
   5 -20   1 115.066 11.9993   2
  -2  17  -1 156.811 13.0714   3
  17 -15  -1 122.589 8.77780   3
  17 -15  -1 134.631 8.96729   3
  -2  17  -1 140.425 11.5698   2
  17 -15  -1 128.159 10.0897   2
  -2  17  -1 154.514 11.6754   1
 -15  -2  -1 124.654 12.5239   2
 -15  -2  -1 113.428 10.9153   3
   2 -17   1 142.712 11.6907   2
   2 -17   1 127.158 11.6673   1
  15   2   1 102.680 11.3495   2
  15   2   1 127.296 10.7978   3
 -17  15   1 118.561 9.42636   2
   2 -17   1 122.491 11.8559   3
  14 -15  -1 275.738 18.9795   2
 -15   1  -1 305.561 22.0919   2
  14 -15  -1 287.957 19.1831   3
  14 -15  -1 290.339 21.0240   1
   1  14  -1 290.707 21.2883   2
 -15   1  -1 270.569 19.9610   3
   1  14  -1 271.504 21.0542   1
   1  14  -1 346.259 22.7721   3
 -14  15   1 339.385 20.7266   3
  -1 -14   1 289.811 22.7281   1
  15  -1   1 281.244 21.0056   3
 -14  15   1 300.213 19.8121   2
  -1 -14   1 322.386 23.2216   3
  -1 -14   1 302.644 22.3890   2
  15  -1   1 291.874 22.5850   2
  11 -15  -1 545.221 35.2527   3
   4  11  -1 521.316 37.1201   3
  11 -15  -1 553.281 33.7131   2
 -15   4  -1 504.180 34.5940   3
 -15   4  -1 529.669 36.7183   2
  11 -15  -1 522.964 33.7617   2
  11 -15  -1 600.443 36.5159   1
   4  11  -1 573.482 37.1688   2
  15  -4   1 483.583 33.2127   3
  -4 -11   1 467.141 35.6734   1
  15  -4   1 504.512 35.1771   2
  -4 -11   1 592.672 36.1046   2
  -4 -11   1 486.353 35.5191   3
 -11  15   1 581.154 34.4139   3
   7   8  -1 52.1884 7.37991   1
   8 -15  -1 70.5275 4.83924   2
   8 -15  -1 56.6622 4.53618   2
   8 -15  -1 70.4905 6.84614   1
   8 -15  -1 67.2342 6.41256   3
 -15   7  -1 58.3472 4.54376   3
   7   8  -1 51.0247 6.72864   3
   7   8  -1 53.7812 6.92175   2
  -7  -8   1 63.5393 7.65379   2
  15  -7   1 66.9988 5.08898   3
  -8  15   1 84.1616 7.29145   3
  -8  15   1 74.3947 8.26175   1
  -7  -8   1 61.6478 7.86163   1
  15  -7   1 64.4774 6.80431   2
  -7  -8   1 63.3097 7.55872   3
   5 -15  -1 25.2999 4.26836   1
  10   5  -1 22.3399 5.04752   1
   5 -15  -1 23.7979 4.17691   3
  10   5  -1 20.0414 4.06503   3
  10   5  -1 24.9727 5.18596   2
   5 -15  -1 29.8003 3.29217   2
 -15  10  -1 27.9496 3.85788   2
  -5  15   1 24.1554 3.03811   2
  15 -10   1 26.6169 3.78754   2
  -5  15   1 17.7214 3.45707   1
 -10  -5   1 22.7750 4.25152   3
  -5  15   1 26.1199 4.33866   3
 -10  -5   1 23.0331 5.58031   2
  15 -10   1 21.9236 1.86402   3
  13   2  -1 29.6646 5.05564   2
 -15  13  -1 25.2015 3.55990   2
  15 -13   1 38.9271 3.22541   3
 -13  -2   1 18.7743 5.06278   2
 -13  -2   1 32.8540 4.83094   3
  15 -13   1 28.9028 3.05909   3
  15 -13   1 22.2818 3.63982   2
 -15  16  -1 121.992 9.18840   2
  16  -1  -1 103.042 9.69646   3
  16  -1  -1 115.852 15.2337   2
  -1 -15  -1 118.097 10.5646   2
  -1 -15  -1 142.351 12.3156   1
  -1 -15  -1 115.427 11.2678   3
  15 -16   1 116.482 9.21684   3
 -16   1   1 123.291 11.7884   2
   1  15   1 116.202 11.3673   3
  15 -16   1 128.741 9.44659   2
 -16   1   1 115.044 10.0502   3
   1  15   1 123.599 10.7700   2
  15 -16   1 118.768 9.22257   3
  19  -4  -1 118.088 9.84569   3
  -4 -15  -1 121.020 12.6479   1
  19  -4  -1 126.815 11.9784   2
  -4 -15  -1 111.457 11.8169   3
 -15  19  -1 137.001 9.48239   2
  -4 -15  -1 112.200 11.4038   2
 -19   4   1 108.928 11.8036   2
   4  15   1 115.930 12.1742   1
  15 -19   1 129.110 10.3051   3
  15 -19   1 128.168 10.7336   1
  15 -19   1 122.645 9.46473   2
   4  15   1 137.208 12.6103   3
 -19   4   1 117.411 9.84350   3
   4  15   1 129.271 11.8490   2
  15 -19   1 137.450 10.5074   3
  -7 -15  -1 127.593 14.5467   1
  -7 -15  -1 151.686 14.0230   3
  22  -7  -1 119.229 12.4959   2
  -7 -15  -1 144.634 13.4538   2
  15 -22   1 143.136 12.0172   3
   7  15   1 133.113 14.2873   1
  15 -22   1 145.470 10.5614   2
  15 -22   1 154.237 12.0704   3
   7  15   1 152.940 13.6508   2
  15 -22   1 129.822 11.7753   1
 -22   7   1 123.054 10.0288   3
 -22   7   1 135.910 10.3102   3
 -22   7   1 132.902 13.1727   2
  15 -22   1 133.920 10.2291   2
 -15  25  -1 53.7148 7.65990   3
 -10 -15  -1 46.4345 8.02470   2
 -10 -15  -1 42.2235 10.1004   1
 -10 -15  -1 39.1767 7.74471   3
  10  15   1 23.6324 6.77490   1
  15 -25   1 38.9211 4.12337   2
 -25  10   1 30.1768 6.61996   2
 -25  10   1 24.2485 3.80546   3
  15 -25   1 46.3868 6.34127   1
  15 -25   1 54.8254 6.81042   3
 -25  10   1 32.3025 3.31217   3
  15 -25   1 42.7439 4.52437   2
 -13 -15  -1 11.0324 4.93503   3
 -13 -15  -1 18.1328 8.11753   1
 -13 -15  -1 23.6864 6.92967   2
  13  15   1 20.7860 7.07003   1
  15 -28   1 28.6712 6.57149   3
 -28  13   1 17.8499 6.16306   2
  15 -28   1 18.5734 5.11971   1
  15 -28   1 25.4898 4.43814   2
  15 -28   1 18.8390 3.17238   2
 -16 -15  -1 125.443 13.9722   3
 -16 -15  -1 94.3465 13.2919   2
  15 -31   1 101.266 12.2646   3
  15 -31   1 112.414 9.66388   2
  15 -31   1 129.024 13.1475   1
  15 -31   1 125.546 10.2327   2
  16  15   1 125.963 16.0136   1
 -31  16   1 116.165 12.7835   2
 -16 -12  -1 7.32459 4.75780   2
  28 -16  -1 18.5302 4.87682   2
 -16 -12  -1 15.2882 5.86075   3
  12 -28   1 16.7198 5.27625   1
 -28  16   1 14.1303 4.56876   2
  12 -28   1 17.0210 3.63558   2
  12 -28   1 21.7620 6.19979   3
  12 -28   1 16.9078 3.95162   2
  16  12   1 12.1737 6.00552   1
  25 -16  -1 43.0863 6.29932   2
 -16  -9  -1 49.7660 8.61567   2
 -16  -9  -1 56.6225 8.08832   3
   9 -25   1 72.6585 8.21241   1
  16   9   1 20.2655 7.12216   1
 -25  16   1 43.0963 6.10770   2
   9 -25   1 50.7988 5.63668   2
  22 -16  -1 39.4480 5.52804   2
  -6  22  -1 55.1093 6.02887   1
  -6  22  -1 52.7698 6.10808   2
 -16  -6  -1 49.6343 7.11115   3
 -16  -6  -1 46.9879 7.78445   2
 -22  16   1 42.3565 5.64070   2
  16   6   1 53.2493 7.09405   3
  16   6   1 46.2188 12.5555   1
   6 -22   1 56.8803 7.53113   1
   6 -22   1 45.2047 6.06390   2
   6 -22   1 66.1841 8.46829   3
  19 -16  -1 346.109 26.1669   2
  -3  19  -1 415.349 27.5973   1
  19 -16  -1 397.870 24.3749   3
 -16  -3  -1 342.414 28.8686   2
 -16  -3  -1 374.589 27.6685   3
  -3  19  -1 468.974 30.0928   3
  19 -16  -1 389.091 24.3014   3
  -3  19  -1 409.461 27.6421   2
   3 -19   1 456.927 29.2892   3
  16   3   1 375.235 30.4445   1
  16   3   1 344.734 26.9142   3
   3 -19   1 393.080 27.2999   2
 -19  16   1 345.473 25.4934   2
   3 -19   1 408.765 28.3763   1
  16   3   1 383.009 28.4998   2
  16 -16  -1 -0.1330 0.84812   2
   0  16  -1 2.35791 1.85165   3
  16 -16  -1 2.19628 1.86357   1
   0  16  -1 -0.9124 1.46083   2
   0  16  -1 -2.0063 1.06354   1
 -16   0  -1 3.40723 2.27207   2
  16 -16  -1 2.64992 1.16648   3
 -16   0  -1 1.77183 1.79401   3
   0 -16   1 -1.6399 1.20221   1
   0 -16   1 -1.9300 1.48522   2
 -16  16   1 1.39555 1.14593   3
  16   0   1 7.18296 3.19678   2
  16   0   1 3.57745 1.83192   3
  16   0   1 2.02706 2.53883   1
   0 -16   1 1.23055 1.84973   3
 -16  16   1 1.21129 1.11744   2
  13 -16  -1 218.720 14.1563   2
  13 -16  -1 238.890 16.8327   1
 -16   3  -1 195.767 15.1034   3
   3  13  -1 212.303 17.1151   2
 -16   3  -1 189.195 16.8682   2
  13 -16  -1 247.879 15.5334   3
   3  13  -1 206.026 17.7271   3
  16  -3   1 187.556 13.8828   3
 -13  16   1 238.814 14.6780   3
  -3 -13   1 175.731 15.8169   3
  -3 -13   1 197.559 15.8543   2
 -13  16   1 190.929 12.6094   2
  -3 -13   1 170.664 15.8554   1
  16  -3   1 174.966 15.4102   2
 -16   6  -1 66.7313 5.64844   3
  10 -16  -1 79.7316 7.60287   1
  10 -16  -1 77.3105 7.02231   3
   6  10  -1 76.3566 8.14739   2
   6  10  -1 61.8669 7.72763   3
  10 -16  -1 69.2550 5.08530   2
 -16   6  -1 74.7777 7.70036   2
  10 -16  -1 77.3014 5.29666   2
   6  10  -1 78.2850 8.71520   1
  -6 -10   1 86.3350 8.55530   2
 -10  16   1 91.1616 7.37423   1
  16  -6   1 66.8507 7.27765   2
  -6 -10   1 61.6547 7.63142   3
 -10  16   1 74.5038 7.05990   3
  -6 -10   1 66.3239 9.37326   1
  16  -6   1 57.0415 5.34895   3
   7 -16  -1 119.762 10.5410   3
   9   7  -1 118.464 12.3117   1
 -16   9  -1 125.801 8.11396   3
   9   7  -1 124.937 11.5231   2
   9   7  -1 106.977 10.7931   3
 -16   9  -1 111.432 12.6990   2
   7 -16  -1 131.809 9.05266   2
   7 -16  -1 133.917 11.0569   1
  -7  16   1 116.885 10.4348   1
  16  -9   1 96.0964 6.95921   3
  -9  -7   1 110.154 10.6740   2
  -7  16   1 106.124 9.67481   3
  -9  -7   1 111.686 10.2114   3
  -7  16   1 120.386 8.03106   2
  16  -9   1 95.7848 9.09672   2
  12   4  -1 76.4917 8.06971   3
   4 -16  -1 83.6533 7.16700   2
  12   4  -1 78.9337 10.0732   1
 -16  12  -1 81.5864 7.39170   2
   4 -16  -1 79.8350 8.31912   3
   4 -16  -1 79.2324 8.35315   1
  12   4  -1 72.8890 8.60307   2
 -12  -4   1 77.6142 9.34588   2
  -4  16   1 79.9381 8.21885   1
  16 -12   1 101.070 8.18840   2
  -4  16   1 88.9865 7.65246   2
  16 -12   1 91.4932 6.12991   3
  16 -12   1 89.6945 6.01660   3
 -12  -4   1 82.7489 8.77340   3
  -4  16   1 86.1054 8.98130   3
  15   1  -1 105.143 10.1080   3
   1 -16  -1 138.672 12.0215   1
   1 -16  -1 120.031 11.3372   3
 -16  15  -1 126.953 9.60200   2
  15   1  -1 125.922 12.0298   2
   1 -16  -1 111.368 10.2048   2
  16 -15   1 126.803 8.98223   3
  16 -15   1 115.581 8.85940   3
 -15  -1   1 117.448 11.8785   2
 -15  -1   1 120.657 11.7606   3
  -1  16   1 114.707 11.0284   1
  -1  16   1 140.601 10.8332   2
  16 -15   1 124.260 9.68999   2
  -1  16   1 117.189 12.9390   3
  -2 -16  -1 470.152 33.3214   1
  18  -2  -1 431.224 30.3909   3
 -16  18  -1 441.211 29.5195   2
  18  -2  -1 451.445 32.4996   2
  -2 -16  -1 444.919 32.5003   3
  -2 -16  -1 479.189 31.9230   2
  16 -18   1 472.692 30.7589   1
 -18   2   1 466.896 32.6799   2
  16 -18   1 454.907 29.3942   2
   2  16   1 454.419 32.4130   3
 -18   2   1 413.374 29.9136   3
   2  16   1 440.497 31.3366   2
  16 -18   1 450.231 29.5564   3
  16 -18   1 432.111 29.4973   3
  -5 -16  -1 403.843 33.6419   1
  -5 -16  -1 459.777 32.8181   2
 -16  21  -1 483.726 29.7509   2
  21  -5  -1 409.039 32.4525   2
  -5 -16  -1 489.006 33.7093   3
 -21   5   1 441.868 33.4747   2
  16 -21   1 464.553 30.1431   2
  16 -21   1 498.367 33.1915   3
  16 -21   1 472.316 31.2998   3
   5  16   1 448.123 33.0607   2
  16 -21   1 447.882 31.6313   1
   5  16   1 433.000 33.8250   1
 -21   5   1 471.089 30.5780   3
  -8 -16  -1 27.2093 6.65035   2
  -8 -16  -1 26.3938 7.50132   1
  24  -8  -1 10.5283 4.06906   2
  -8 -16  -1 22.6180 6.45234   3
   8  16   1 13.7862 6.01267   1
 -24   8   1 22.6262 3.32187   3
  16 -24   1 32.1808 3.63014   2
  16 -24   1 39.0211 5.39753   3
   8  16   1 27.7350 7.62790   2
 -24   8   1 19.3744 3.18840   3
 -24   8   1 20.2266 5.62709   2
  16 -24   1 47.0898 6.12573   1
  16 -24   1 42.0854 5.71018   3
 -11 -16  -1 460.344 35.6776   3
 -11 -16  -1 450.091 37.4011   1
 -11 -16  -1 509.911 36.3175   2
 -27  11   1 480.431 31.1411   3
  16 -27   1 488.145 32.5470   2
 -27  11   1 487.619 36.3752   2
  16 -27   1 510.494 35.6464   1
  16 -27   1 513.538 35.6083   3
  16 -27   1 525.648 33.1008   2
  16 -27   1 524.218 35.7146   3
 -27  11   1 485.640 31.1979   3
  11  16   1 508.669 39.0668   1
 -14 -16  -1 92.1171 12.0250   2
 -14 -16  -1 77.1258 11.2944   3
  16 -30   1 94.3828 7.92930   2
  14  16   1 77.9068 12.6856   1
  16 -30   1 79.6049 9.98672   3
  16 -30   1 86.6670 10.2045   1
 -30  14   1 85.7237 10.8547   2
  16 -30   1 78.7244 7.26188   2
 -17 -16  -1 53.5546 11.3981   2
 -17 -16  -1 39.8891 11.3727   3
 -33  17   1 55.8342 8.51633   2
  16 -33   1 32.3136 4.55927   2
  16 -33   1 39.4967 7.53070   1
  16 -33   1 39.4485 9.19037   3
  17  16   1 47.9723 12.1883   1
  16 -33   1 35.6247 4.94088   2
 -17 -13  -1 100.713 13.0128   2
 -17 -13  -1 87.7782 11.8947   3
  13 -30   1 114.134 12.2018   3
  13 -30   1 97.4638 8.59375   2
 -30  17   1 95.5375 10.7772   2
  17  13   1 87.5258 14.0762   1
  13 -30   1 80.7451 10.5478   1
 -17 -10  -1 74.9549 10.9099   2
 -10  27  -1 84.4940 7.79452   1
  27 -17  -1 77.8458 8.95799   2
 -17 -10  -1 78.1438 10.1965   3
  10 -27   1 91.5918 8.33310   2
  10 -27   1 82.0199 10.5011   3
  10 -27   1 107.286 9.26536   2
  17  10   1 98.8679 14.0351   1
 -27  17   1 74.9653 9.08518   2
  10 -27   1 83.6069 10.2235   1
  -7  24  -1 176.332 13.2334   2
  -7  24  -1 159.457 12.6900   1
  24 -17  -1 122.711 12.4591   2
 -17  -7  -1 164.531 14.7220   3
 -17  -7  -1 161.576 15.8740   2
  17   7   1 145.541 16.3472   1
   7 -24   1 175.838 15.1824   3
   7 -24   1 144.040 13.9883   1
   7 -24   1 151.174 12.9212   2
 -24  17   1 133.259 12.2655   2
  17   7   1 159.174 14.3915   3
  -4  21  -1 112.315 10.4565   2
 -17  -4  -1 112.063 12.4165   2
 -17  -4  -1 101.191 10.7316   3
  21 -17  -1 115.503 9.77968   2
  -4  21  -1 148.701 13.2172   3
  -4  21  -1 106.072 10.1618   1
   4 -21   1 128.526 12.4343   3
   4 -21   1 121.308 11.9200   1
   4 -21   1 100.286 10.5121   2
  17   4   1 123.112 13.9721   1
 -21  17   1 110.639 9.53700   2
 -17  -1  -1 732.527 52.8976   2
  18 -17  -1 775.268 49.6053   2
 -17  -1  -1 782.645 51.0830   3
  -1  18  -1 831.702 53.3542   3
  18 -17  -1 794.009 48.7266   3
  -1  18  -1 745.947 51.4501   1
  18 -17  -1 784.451 48.8427   3
  -1  18  -1 770.054 51.5699   2
   1 -18   1 750.986 52.1496   1
  17   1   1 783.904 52.3730   2
   1 -18   1 775.599 51.3463   2
  17   1   1 743.664 50.5419   3
  17   1   1 749.959 54.3864   1
   1 -18   1 796.812 52.5635   3
 -18  17   1 787.919 49.0242   2
  15 -17  -1 115.002 10.9628   1
 -17   2  -1 112.263 10.0571   3
  15 -17  -1 141.104 9.87535   3
   2  15  -1 123.437 11.6087   2
 -17   2  -1 126.738 12.1563   2
   2  15  -1 139.697 12.0497   1
   2  15  -1 140.354 12.6055   3
  -2 -15   1 131.837 11.8515   2
 -15  17   1 140.360 10.2494   3
  17  -2   1 123.343 11.7719   2
  -2 -15   1 99.9672 11.4340   3
 -15  17   1 126.901 8.81364   2
  17  -2   1 121.434 10.1656   3
  -2 -15   1 125.406 12.2943   1
  12 -17  -1 276.864 17.7570   3
   5  12  -1 248.465 19.6958   1
   5  12  -1 245.475 19.1798   2
 -17   5  -1 224.038 16.5285   3
 -17   5  -1 242.278 18.9283   2
  12 -17  -1 232.443 15.6255   2
  12 -17  -1 256.683 15.7846   2
  12 -17  -1 245.281 18.4172   1
  -5 -12   1 239.477 19.6899   1
  -5 -12   1 262.060 19.4857   2
 -12  17   1 290.384 18.1884   3
  17  -5   1 226.169 16.5027   3
  -5 -12   1 228.036 19.0795   3
  17  -5   1 213.533 18.3565   2
 -17   8  -1 201.509 12.7837   3
   8   9  -1 165.099 15.6542   2
   9 -17  -1 195.861 13.0423   2
   9 -17  -1 207.183 15.5177   1
   8   9  -1 187.622 15.9011   3
   8   9  -1 164.425 16.3730   1
 -17   8  -1 176.790 15.0712   2
   9 -17  -1 208.803 12.9149   2
   9 -17  -1 207.715 15.1341   3
  -8  -9   1 195.102 16.2263   2
  -8  -9   1 171.138 15.4402   3
  -8  -9   1 178.010 16.4559   1
  17  -8   1 175.739 12.5322   3
  -9  17   1 218.289 14.8345   1
  17  -8   1 187.706 14.9787   2
  -9  17   1 226.012 15.5386   3
   6 -17  -1 481.467 31.4221   3
  11   6  -1 471.654 33.7389   1
   6 -17  -1 482.374 29.4870   2
  11   6  -1 426.448 33.5932   2
 -17  11  -1 404.012 33.0186   2
  11   6  -1 398.639 31.0176   3
   6 -17  -1 460.164 31.4216   1
  -6  17   1 437.454 33.9581   1
  -6  17   1 503.781 32.2765   3
  -6  17   1 478.892 29.9657   2
 -11  -6   1 448.660 31.9064   3
 -11  -6   1 464.402 33.0167   2
  17 -11   1 408.952 30.6818   2
  14   3  -1 134.795 14.6562   1
   3 -17  -1 148.188 13.1639   1
 -17  14  -1 147.704 11.4944   2
  14   3  -1 133.687 13.1602   2
   3 -17  -1 154.155 11.7736   2
   3 -17  -1 188.687 13.8613   3
  14   3  -1 123.055 11.9647   3
  17 -14   1 134.310 11.8396   2
 -14  -3   1 142.734 12.9215   3
  -3  17   1 186.626 12.7250   2
  -3  17   1 173.906 15.9522   3
  17 -14   1 150.292 10.4003   3
 -14  -3   1 151.365 14.3265   2
  17 -14   1 158.200 10.4922   3
  -3  17   1 172.886 13.4057   1
   0 -17  -1 -1.0493 1.17781   2
  17   0  -1 0.83563 2.24812   2
  17   0  -1 0.50993 1.46987   3
 -17  17  -1 3.54816 1.54829   2
   0 -17  -1 -1.6923 1.36396   3
   0 -17  -1 2.17318 1.74959   1
 -17   0   1 -0.5743 1.67219   3
  17 -17   1 1.04495 1.07023   3
   0  17   1 -0.6693 1.10890   2
   0  17   1 0.35936 1.49257   3
  17 -17   1 3.19301 1.46978   3
 -17   0   1 -0.2080 2.15317   2
  17 -17   1 0.99151 1.17769   2
  20  -3  -1 489.487 36.1055   2
  -3 -17  -1 543.063 35.9037   2
  -3 -17  -1 531.148 36.6759   3
 -17  20  -1 515.548 32.9374   2
  -3 -17  -1 492.487 37.7232   1
  20  -3  -1 468.881 33.7558   3
 -20   3   1 506.349 38.1161   2
  17 -20   1 581.022 35.6605   3
   3  17   1 542.084 37.4309   2
 -20   3   1 512.763 35.4822   3
  17 -20   1 521.115 35.2665   3
  17 -20   1 551.016 34.8898   2
   3  17   1 494.359 37.9099   1
   3  17   1 526.930 39.5194   3
  17 -20   1 567.321 36.4777   1
  23  -6  -1 139.877 14.3102   2
  -6 -17  -1 140.015 14.7086   3
  -6 -17  -1 157.317 16.1565   1
  -6 -17  -1 164.486 14.7372   2
  17 -23   1 154.805 11.8666   2
  17 -23   1 157.855 13.1946   3
   6  17   1 166.646 16.2057   1
   6  17   1 164.960 15.0863   2
  17 -23   1 165.145 12.1322   2
  17 -23   1 171.018 13.8785   1
  17 -23   1 177.652 13.6333   3
 -23   6   1 181.457 15.9563   2
 -23   6   1 151.699 12.2757   3
  -9 -17  -1 116.339 14.5834   1
  -9 -17  -1 121.581 13.6284   3
  -9 -17  -1 133.269 13.6559   2
   9  17   1 124.764 14.4043   1
  17 -26   1 117.022 11.4753   3
 -26   9   1 98.8128 12.2215   2
  17 -26   1 112.644 14.9458   3
  17 -26   1 127.358 9.52851   2
  17 -26   1 132.350 11.9680   1
 -26   9   1 126.717 9.28426   3
  17 -26   1 133.333 9.94048   2
 -26   9   1 118.073 9.11851   3
 -12 -17  -1 30.0452 9.12529   1
 -12 -17  -1 6.85489 4.22799   3
 -12 -17  -1 14.7236 5.54786   2
  12  17   1 27.3626 8.39576   1
 -29  12   1 15.2815 5.15749   2
  17 -29   1 10.4580 4.32799   3
  17 -29   1 21.6725 5.63759   1
  17 -29   1 16.3713 3.18250   2
  17 -29   1 20.0381 5.14367   3
  17 -29   1 21.8349 3.39354   2
 -15 -17  -1 90.2787 14.8292   3
 -15 -17  -1 92.9640 13.2029   2
  17 -32   1 124.221 12.3229   3
  17 -32   1 88.9441 8.16812   2
  15  17   1 100.494 14.5147   1
  17 -32   1 92.4259 11.4465   1
  17 -32   1 105.086 8.71441   2
 -32  15   1 94.9254 11.9538   2
 -18 -17  -1 63.6661 11.7287   3
 -18 -17  -1 76.2553 12.5677   2
 -35  18   1 68.7665 10.2841   2
  18  17   1 57.1229 13.4577   1
  17 -35   1 67.0266 10.2131   3
  17 -35   1 59.8522 6.55418   2
  17 -35   1 79.2963 10.7651   1
  17 -35   1 67.1210 6.57172   2
 -18 -14  -1 75.2606 11.9500   2
 -18 -14  -1 61.1314 10.6330   3
 -32  18   1 78.1233 9.97509   2
  14 -32   1 75.2944 10.2910   1
  18  14   1 72.0578 18.2995   1
  14 -32   1 76.2045 10.2545   3
  14 -32   1 65.5797 9.81185   2
  14 -32   1 77.2498 7.41994   2
  29 -18  -1 87.2056 10.0288   2
 -18 -11  -1 99.3203 11.9165   3
 -18 -11  -1 104.423 13.1934   2
  11 -29   1 95.8304 8.93901   2
  11 -29   1 87.4084 11.0677   1
 -29  18   1 109.836 10.9566   2
  11 -29   1 89.9458 11.5093   3
  11 -29   1 105.445 9.68049   2
  18  11   1 114.276 14.7653   1
  -8  26  -1 93.5940 8.36033   1
 -18  -8  -1 81.5319 10.1001   3
 -18  -8  -1 55.9059 9.87912   2
  -8  26  -1 88.5793 8.53825   2
  26 -18  -1 75.2351 8.42507   2
 -26  18   1 66.3161 8.16813   2
  18   8   1 64.3074 11.3132   1
   8 -26   1 77.7217 10.0140   1
   8 -26   1 90.1528 8.46822   2
   8 -26   1 114.981 11.6451   3
   8 -26   1 95.1628 9.08847   2
  -5  23  -1 86.8812 8.33018   1
  23 -18  -1 65.6832 7.45053   2
 -18  -5  -1 78.4138 9.18761   3
 -18  -5  -1 72.8238 10.2861   2
  -5  23  -1 84.8678 8.47161   2
  18   5   1 68.8095 8.60152   3
 -23  18   1 70.7701 7.47386   2
   5 -23   1 74.4140 8.23430   2
  18   5   1 72.7314 10.9740   1
   5 -23   1 81.1582 9.95990   3
   5 -23   1 73.6416 9.18209   1
  20 -18  -1 508.764 34.2867   2
  -2  20  -1 513.118 35.9934   2
 -18  -2  -1 486.215 35.6948   3
  20 -18  -1 540.430 32.9453   3
  20 -18  -1 501.599 32.7056   3
  -2  20  -1 539.516 38.0713   3
  -2  20  -1 537.357 36.1644   1
 -18  -2  -1 568.676 38.5512   2
  18   2   1 515.592 36.5272   3
   2 -20   1 541.897 38.1592   1
  18   2   1 532.725 40.5440   1
   2 -20   1 541.044 38.3951   3
   2 -20   1 550.158 37.1236   2
 -20  18   1 522.163 34.7804   2
  17 -18  -1 738.245 49.8368   2
  17 -18  -1 806.511 50.1340   3
   1  17  -1 791.005 52.7631   2
 -18   1  -1 779.687 53.7035   2
   1  17  -1 847.755 54.2737   3
   1  17  -1 794.786 52.9096   1
  17 -18  -1 801.346 52.5622   1
  -1 -17   1 797.219 52.5602   2
  18  -1   1 717.919 50.8989   3
  18  -1   1 727.874 52.7472   2
 -17  18   1 769.028 49.3868   2
  -1 -17   1 749.426 53.2425   1
 -17  18   1 895.269 50.5786   3
  -1 -17   1 827.999 53.6721   3
   4  14  -1 71.4469 8.88229   3
 -18   4  -1 79.2808 6.95785   3
 -18   4  -1 68.3842 8.58231   2
  14 -18  -1 99.2222 7.58186   3
  14 -18  -1 80.6039 8.23267   1
   4  14  -1 67.9859 8.52610   2
  14 -18  -1 81.1049 5.79928   2
  -4 -14   1 64.2103 9.04338   1
  18  -4   1 82.5546 9.31545   2
 -14  18   1 108.790 8.38825   3
  -4 -14   1 88.9557 9.68951   3
  18  -4   1 80.7990 7.24474   3
  -4 -14   1 73.3234 8.97827   2
   7  11  -1 432.435 32.2632   2
   7  11  -1 453.202 33.1561   1
 -18   7  -1 450.173 31.7739   2
  11 -18  -1 472.132 31.6083   1
 -18   7  -1 416.272 28.9996   3
  11 -18  -1 446.813 28.5296   2
  11 -18  -1 494.759 28.7449   2
  11 -18  -1 477.927 32.5632   3
 -11  18   1 489.723 29.7106   3
  18  -7   1 424.535 29.8141   2
  -7 -11   1 437.467 30.8383   2
  18  -7   1 392.205 27.0916   3
  -7 -11   1 387.632 31.0159   1
  -7 -11   1 417.554 30.4806   3
  10   8  -1 424.476 33.2757   2
 -18  10  -1 457.734 28.9552   3
 -18  10  -1 430.199 31.6648   2
   8 -18  -1 505.011 32.7289   1
  10   8  -1 468.955 34.5870   1
  10   8  -1 405.048 32.3224   3
   8 -18  -1 517.574 32.4476   3
   8 -18  -1 506.523 30.1329   2
 -10  -8   1 456.553 33.0490   2
  18 -10   1 452.677 31.3184   2
  -8  18   1 513.355 31.2699   1
  -8  18   1 530.896 32.4535   3
  18 -10   1 400.127 28.2634   3
 -10  -8   1 440.758 32.2216   3
  13   5  -1 1.65985 2.23394   1
 -18  13  -1 3.32272 1.98245   2
  13   5  -1 3.79368 2.90150   2
   5 -18  -1 2.52048 2.09955   3
   5 -18  -1 3.26347 1.70511   2
  13   5  -1 3.73773 2.23641   3
   5 -18  -1 4.96503 2.92606   1
  18 -13   1 2.28242 1.52157   2
  -5  18   1 2.87768 1.62049   2
 -13  -5   1 4.35978 2.49776   3
 -13  -5   1 -0.1063 1.92659   2
  -5  18   1 5.80604 2.48442   3
  16   2  -1 406.108 30.3162   3
   2 -18  -1 420.462 31.4447   3
   2 -18  -1 464.394 32.1901   1
  16   2  -1 407.411 31.6817   2
 -18  16  -1 460.721 29.5377   2
   2 -18  -1 480.398 32.0986   2
 -16  -2   1 439.640 32.1225   3
  -2  18   1 508.912 32.1129   2
  18 -16   1 467.542 31.1519   2
  -2  18   1 451.466 33.3246   3
 -16  -2   1 471.714 34.1119   2
  -2  18   1 435.130 32.5254   1
  18 -16   1 499.261 30.7365   3
  18 -16   1 453.921 29.7134   3
 -18  19  -1 36.8387 4.10579   2
  19  -1  -1 21.6978 4.18595   3
  19  -1  -1 22.9486 5.43502   2
  -1 -18  -1 26.2852 5.07699   2
  -1 -18  -1 37.1764 6.32352   3
  -1 -18  -1 33.1830 6.33501   1
 -19   1   1 37.8037 6.66505   2
   1  18   1 38.0773 6.28674   3
  18 -19   1 35.5410 4.12597   3
   1  18   1 32.7368 5.31807   2
  18 -19   1 26.7845 3.84996   3
 -19   1   1 31.2721 4.96510   3
  18 -19   1 32.1190 4.06659   2
  -4 -18  -1 98.7223 12.2472   1
  22  -4  -1 96.5578 8.96582   3
  -4 -18  -1 97.5243 10.6287   2
  -4 -18  -1 93.3053 11.3001   3
 -18  22  -1 104.389 8.14894   2
   4  18   1 97.7840 11.5507   1
  18 -22   1 124.589 9.79622   3
   4  18   1 96.3617 10.8823   2
  18 -22   1 112.422 8.81903   2
  18 -22   1 116.879 10.4943   1
 -22   4   1 89.7922 9.11446   3
  18 -22   1 141.111 10.7689   3
 -22   4   1 88.6590 11.5176   2
  -7 -18  -1 186.599 18.9554   1
  -7 -18  -1 194.894 17.4204   2
  -7 -18  -1 187.765 17.8766   3
  18 -25   1 206.280 16.8444   1
 -25   7   1 198.079 14.8575   3
  18 -25   1 215.234 16.6065   3
  18 -25   1 203.227 14.6493   2
  18 -25   1 215.562 16.5103   3
 -25   7   1 215.704 18.8344   2
   7  18   1 207.577 19.5551   1
 -25   7   1 204.464 15.0936   3
  18 -25   1 211.677 14.9113   2
 -10 -18  -1 21.3379 6.86822   1
 -10 -18  -1 44.3875 8.99481   2
 -10 -18  -1 22.3434 6.82184   3
  18 -28   1 30.5424 3.59356   2
  10  18   1 41.4388 10.1564   1
 -28  10   1 22.1534 3.20448   3
  18 -28   1 30.1931 6.27871   3
  18 -28   1 38.5405 4.24641   2
 -28  10   1 26.4477 3.32300   3
 -28  10   1 22.0461 6.28364   2
  18 -28   1 32.8925 6.69261   1
  18 -28   1 28.7374 5.69503   3
 -13 -18  -1 187.331 18.4360   3
 -13 -18  -1 133.942 18.1122   1
 -13 -18  -1 206.961 19.0006   2
  18 -31   1 160.750 15.1527   1
  13  18   1 152.075 18.0530   1
  18 -31   1 167.775 12.0087   2
  18 -31   1 138.552 14.3810   3
  18 -31   1 153.759 11.5570   2
 -31  13   1 144.947 15.8578   2
 -16 -18  -1 62.1877 13.1571   2
 -16 -18  -1 46.6361 10.5784   3
  16  18   1 47.0625 12.0064   1
  18 -34   1 40.4548 4.96558   2
 -34  16   1 44.1547 9.28355   2
  18 -34   1 40.4575 8.19369   3
  18 -34   1 42.8658 4.88482   2
  18 -34   1 57.4051 8.81835   1
 -19 -18  -1 76.4240 14.3470   2
 -19 -18  -1 67.5963 13.0904   3
  19  18   1 84.5127 23.3780   1
  18 -37   1 85.2028 8.00281   2
  18 -37   1 91.9258 8.24222   2
 -37  19   1 54.6526 11.0804   2
  18 -37   1 124.228 13.8899   1
  18 -37   1 128.006 13.9094   3
 -19 -15  -1 57.7086 11.9811   2
 -19 -15  -1 59.1927 11.7916   3
 -34  19   1 61.9349 9.35580   2
  15 -34   1 58.3366 9.60506   3
  19  15   1 72.5992 15.7557   1
  15 -34   1 71.9014 8.11511   2
  15 -34   1 79.0064 10.6509   1
  15 -34   1 60.8053 6.66300   2
 -19 -12  -1 345.521 28.5398   3
 -31  19   1 378.574 27.5018   2
  19  12   1 359.036 32.2025   1
  12 -31   1 324.029 28.0383   3
  12 -31   1 387.673 29.0176   1
  12 -31   1 361.531 25.5754   2
  12 -31   1 343.548 24.9956   2
 -19  -9  -1 13.4805 5.09180   3
  28 -19  -1 14.4994 4.47729   2
  -9  28  -1 25.0990 4.21978   1
 -19  -9  -1 24.3876 7.34599   2
  19   9   1 31.1868 9.24324   1
   9 -28   1 27.5351 5.40239   2
   9 -28   1 22.0752 6.05708   1
   9 -28   1 21.1202 6.16065   3
 -28  19   1 20.5595 4.91298   2
   9 -28   1 20.2042 4.64253   2
  25 -19  -1 216.546 17.8807   2
 -19  -6  -1 248.723 20.0698   3
  -6  25  -1 251.660 18.6804   2
  -6  25  -1 241.503 18.2445   1
 -19  -6  -1 236.473 21.4948   2
   6 -25   1 238.427 20.7648   3
   6 -25   1 254.612 19.1849   2
   6 -25   1 241.264 20.5814   1
  19   6   1 249.344 23.4039   1
 -25  19   1 228.302 17.9914   2
 -19  -3  -1 693.992 47.4368   3
 -19  -3  -1 729.344 49.9759   2
  -3  22  -1 696.048 47.1494   2
  -3  22  -1 777.925 47.5800   1
  22 -19  -1 633.110 45.4620   2
   3 -22   1 694.576 46.3100   2
   3 -22   1 704.994 47.8342   1
  19   3   1 653.472 46.0964   3
 -22  19   1 650.367 44.1410   2
   3 -22   1 707.634 48.0738   3
  19   3   1 691.388 50.4598   1
  19 -19  -1 -0.2981 1.77002   1
 -19   0  -1 0.89416 1.64253   3
   0  19  -1 -3.0021 1.55841   2
  19 -19  -1 1.55972 1.04813   3
 -19   0  -1 5.33877 3.18783   2
   0  19  -1 -1.2830 1.40316   1
   0  19  -1 -0.8325 2.41366   3
  19 -19  -1 0.40541 1.08954   3
  19 -19  -1 -0.5299 1.03238   2
  19   0   1 0.15237 1.39987   3
  19   0   1 -1.1562 1.71904   2
  19   0   1 -5.1862 1.64836   1
   0 -19   1 -2.7838 1.54839   1
 -19  19   1 -0.3936 1.01496   2
   0 -19   1 -3.5573 1.10607   3
   0 -19   1 -3.7732 1.56039   2
  16 -19  -1 399.877 26.9464   1
   3  16  -1 386.295 28.2983   3
  16 -19  -1 444.380 25.4180   3
   3  16  -1 328.301 26.9617   1
  16 -19  -1 346.228 24.5609   2
 -19   3  -1 374.822 25.2742   3
 -19   3  -1 339.907 27.4172   2
   3  16  -1 327.618 26.8635   2
 -16  19   1 355.151 22.6537   2
  19  -3   1 372.886 24.4851   3
  -3 -16   1 379.134 27.3322   3
  -3 -16   1 349.469 26.3722   2
  -3 -16   1 314.580 26.7022   1
  19  -3   1 334.582 26.2534   2
   6  13  -1 89.3303 9.95257   1
  13 -19  -1 91.6149 8.68904   1
  13 -19  -1 77.6047 5.82162   2
  13 -19  -1 87.2419 8.78260   3
 -19   6  -1 86.6533 9.13147   2
 -19   6  -1 81.3187 6.68102   3
   6  13  -1 93.3365 11.8521   2
  13 -19  -1 77.1822 5.68550   2
  -6 -13   1 68.1897 8.72146   2
  19  -6   1 69.7505 11.7290   2
  -6 -13   1 84.5398 9.40665   3
  19  -6   1 71.8803 6.40824   3
 -13  19   1 88.1459 8.02715   3
   9  10  -1 178.749 15.9837   1
  10 -19  -1 163.655 13.4824   3
  10 -19  -1 175.896 11.3710   2
  10 -19  -1 164.887 11.3650   2
  10 -19  -1 171.317 13.9938   1
 -19   9  -1 163.451 10.9341   3
   9  10  -1 155.717 14.4605   2
   9  10  -1 146.586 14.1444   3
 -19   9  -1 154.334 13.6489   2
  19  -9   1 158.548 10.7413   3
 -10  19   1 157.610 13.5048   3
  -9 -10   1 163.349 14.8504   2
 -10  19   1 163.705 12.8686   1
  -9 -10   1 154.212 14.2932   3
  19  -9   1 168.023 13.6598   2
   7 -19  -1 762.845 52.5001   1
  12   7  -1 752.420 53.2818   2
   7 -19  -1 829.194 50.4146   2
  12   7  -1 804.376 55.2080   1
  12   7  -1 762.194 52.6899   3
 -19  12  -1 777.587 51.6379   2
   7 -19  -1 834.931 52.6671   3
  -7  19   1 845.333 52.6680   2
  -7  19   1 844.389 55.2366   3
  19 -12   1 777.222 53.8591   2
  -7  19   1 859.247 54.0775   1
 -12  -7   1 796.444 55.1047   3
 -12  -7   1 849.867 56.4478   2
  15   4  -1 123.671 13.9644   1
  15   4  -1 122.822 11.3687   3
   4 -19  -1 129.971 12.1485   1
  15   4  -1 113.454 12.0302   2
   4 -19  -1 125.124 11.8912   3
   4 -19  -1 125.773 10.4620   2
 -19  15  -1 128.497 10.5143   2
 -15  -4   1 118.022 11.3463   3
 -15  -4   1 141.940 13.2459   2
  -4  19   1 136.241 10.5333   2
  19 -15   1 117.158 8.10639   3
  -4  19   1 139.774 12.6507   1
  19 -15   1 119.356 8.03878   3
  -4  19   1 127.036 12.0857   3
  19 -15   1 115.369 10.2760   2
 -19  18  -1 37.3380 4.35566   2
   1 -19  -1 32.8753 6.14880   1
  18   1  -1 28.8894 4.89785   3
   1 -19  -1 29.9655 5.99643   3
  18   1  -1 22.4029 5.77775   2
   1 -19  -1 29.7539 4.96832   2
  19 -18   1 34.0992 3.68873   3
  19 -18   1 28.5780 4.11624   2
  -1  19   1 28.0640 4.80558   2
 -18  -1   1 25.7229 6.66068   2
  -1  19   1 44.4594 6.24334   1
  19 -18   1 35.4571 3.74855   3
  -1  19   1 29.4175 5.90085   3
 -18  -1   1 25.1765 4.95278   3
  -2 -19  -1 106.485 11.9722   3
  21  -2  -1 107.981 9.92283   3
  -2 -19  -1 125.247 11.5148   2
  -2 -19  -1 101.859 12.6971   1
 -19  21  -1 108.690 8.87577   2
  19 -21   1 122.671 9.61288   2
 -21   2   1 102.881 12.2959   2
 -21   2   1 117.325 10.4387   3
  19 -21   1 120.904 10.9986   1
  19 -21   1 130.167 9.88784   3
  19 -21   1 112.182 9.56244   3
  -5 -19  -1 80.3173 10.6332   2
  -5 -19  -1 101.009 12.7219   1
 -19  24  -1 104.772 8.29610   2
  -5 -19  -1 110.295 12.3482   3
  19 -24   1 104.300 9.17171   3
  19 -24   1 92.2997 7.76559   2
 -24   5   1 87.7185 8.41957   3
  19 -24   1 85.5238 9.24809   1
 -24   5   1 89.0566 11.2659   2
   5  19   1 94.2381 10.7331   2
 -24   5   1 83.0802 8.16176   3
  19 -24   1 98.8732 8.86602   3
   5  19   1 94.8497 11.4715   1
  -8 -19  -1 114.430 12.9001   2
  -8 -19  -1 107.438 14.0411   1
  -8 -19  -1 116.385 13.4416   3
 -27   8   1 135.226 13.8357   2
  19 -27   1 121.521 9.55599   2
  19 -27   1 117.999 11.5872   3
  19 -27   1 136.676 12.1380   1
 -27   8   1 116.507 9.53088   3
   8  19   1 129.186 14.5532   1
 -27   8   1 106.462 9.31275   3
  19 -27   1 114.554 11.1645   3
  19 -27   1 122.009 9.33504   2
 -11 -19  -1 217.522 20.5158   2
 -11 -19  -1 209.098 22.1529   1
 -11 -19  -1 222.334 20.9138   3
  11  19   1 218.775 22.4190   1
 -30  11   1 222.142 15.3060   3
 -30  11   1 206.505 20.2690   2
  19 -30   1 242.391 19.2396   3
  19 -30   1 250.151 16.5618   2
  19 -30   1 220.587 16.0187   2
  19 -30   1 213.396 19.1362   1
 -30  11   1 252.086 16.4768   3
 -14 -19  -1 170.516 23.1571   2
 -14 -19  -1 168.997 18.2627   3
  19 -33   1 193.106 17.4207   1
  14  19   1 134.830 18.8382   1
 -33  14   1 162.266 17.4930   2
  19 -33   1 196.306 17.1323   3
  19 -33   1 191.458 13.2871   2
  19 -33   1 174.360 12.9322   2
 -17 -19  -1 146.141 17.9177   3
 -17 -19  -1 151.536 18.3611   2
 -36  17   1 123.461 15.4660   2
  19 -36   1 140.038 15.6192   1
  19 -36   1 143.383 11.0756   2
  19 -36   1 150.993 11.0869   2
  17  19   1 166.015 19.9773   1
  19 -36   1 138.882 15.1318   3
 -20 -19  -1 24.6710 8.62486   3
 -20 -19  -1 9.58094 7.05489   2
 -39  20   1 16.6841 6.19080   2
  19 -39   1 14.5984 6.10867   1
  19 -39   1 17.0784 3.15091   2
  20  19   1 0.74514 4.38721   1
  19 -39   1 23.1825 7.41576   3
  19 -39   1 10.5142 2.80758   2
 -20 -16  -1 32.7646 10.1329   2
 -20 -16  -1 31.6238 9.39524   3
  16 -36   1 25.5226 7.55852   1
  20  16   1 25.8936 9.37247   1
 -36  20   1 21.4318 7.03432   2
  16 -36   1 22.9106 7.38215   2
  16 -36   1 27.9452 7.99088   3
  16 -36   1 24.8657 4.75597   2
 -20 -13  -1 25.2815 8.58732   2
 -20 -13  -1 16.4047 6.46287   3
  13 -33   1 28.6687 7.89227   1
  13 -33   1 24.8357 4.24181   2
 -33  20   1 21.4843 6.01097   2
  20  13   1 25.5415 8.67123   1
  13 -33   1 16.7559 6.64827   3
  13 -33   1 25.2795 4.51141   2
  30 -20  -1 65.7078 8.66802   2
 -20 -10  -1 90.3636 13.0292   2
 -20 -10  -1 90.4677 11.3851   3
  10 -30   1 107.326 12.2745   1
  10 -30   1 92.7097 9.27934   2
  10 -30   1 92.8528 9.63968   2
  20  10   1 93.1384 14.2089   1
  10 -30   1 121.595 12.8695   3
 -30  20   1 92.6362 10.1821   2
  -7  27  -1 78.4971 8.22776   2
  -7  27  -1 70.7281 7.85279   1
 -20  -7  -1 56.6791 10.5667   2
  27 -20  -1 71.5335 8.04727   2
 -20  -7  -1 72.2761 9.82578   3
 -27  20   1 77.6646 8.46221   2
   7 -27   1 74.1250 10.3501   1
   7 -27   1 90.8071 9.28173   2
  20   7   1 81.6550 12.5802   1
   7 -27   1 89.2183 11.1869   3
  24 -20  -1 319.170 23.9606   2
  -4  24  -1 338.829 25.2113   2
 -20  -4  -1 315.372 27.6805   2
  -4  24  -1 366.701 25.4916   1
 -20  -4  -1 375.740 26.4592   3
   4 -24   1 382.733 28.4874   3
   4 -24   1 374.690 26.4793   2
  20   4   1 313.798 26.2694   3
   4 -24   1 344.792 27.9013   1
  20   4   1 375.855 30.8929   1
  -1  21  -1 269.512 22.3729   1
  -1  21  -1 282.871 22.4128   2
  21 -20  -1 295.100 19.4289   3
  21 -20  -1 305.225 19.2795   3
 -20  -1  -1 305.321 22.1082   3
  21 -20  -1 323.061 23.4034   1
  21 -20  -1 275.532 20.1994   2
 -20  -1  -1 290.108 24.1864   2
   1 -21   1 270.451 23.2260   3
  20   1   1 298.900 25.7767   1
   1 -21   1 310.823 22.4252   2
  20   1   1 272.983 21.2615   3
   1 -21   1 274.782 23.2491   1
 -21  20   1 277.138 19.3525   2
  18 -20  -1 510.280 32.5316   2
  18 -20  -1 549.327 35.7441   1
 -20   2  -1 497.402 36.6988   2
  18 -20  -1 508.046 33.1489   3
 -20   2  -1 478.220 34.3934   3
   2  18  -1 504.223 36.1095   1
  -2 -18   1 535.082 38.0646   3
  20  -2   1 453.715 34.7566   3
  -2 -18   1 516.175 36.8854   2
 -18  20   1 574.687 34.9145   3
  -2 -18   1 538.007 38.3018   1
 -18  20   1 521.614 33.2557   2
  20  -2   1 520.984 37.5878   2
 -20   5  -1 120.030 12.0539   2
 -20   5  -1 116.578 9.61053   3
   5  15  -1 100.373 11.5510   2
   5  15  -1 122.592 12.4763   3
  15 -20  -1 120.183 8.50758   2
  15 -20  -1 122.769 8.42034   2
  15 -20  -1 147.904 10.6454   3
  15 -20  -1 147.524 11.8268   1
  -5 -15   1 103.670 12.0272   1
  -5 -15   1 123.519 12.3283   3
  -5 -15   1 124.834 12.0499   2
  20  -5   1 113.949 9.28037   3
  20  -5   1 108.529 11.2344   2
  12 -20  -1 55.7572 3.92461   2
   8  12  -1 41.4426 7.27620   1
  12 -20  -1 51.4878 6.17584   3
   8  12  -1 37.1783 6.44297   3
   8  12  -1 40.1641 6.46503   2
  12 -20  -1 42.5966 3.61060   2
 -20   8  -1 42.2702 4.07255   3
  12 -20  -1 56.6665 6.79060   1
 -20   8  -1 29.8847 5.75854   2
  -8 -12   1 45.1065 7.18578   2
 -12  20   1 55.1303 6.51299   3
  -8 -12   1 45.3428 7.04895   3
  20  -8   1 38.9314 9.54928   2
  20  -8   1 38.0461 3.90984   3
  -8 -12   1 39.6641 7.16650   1
   9 -20  -1 386.395 26.6387   3
   9 -20  -1 367.791 26.7663   1
  11   9  -1 312.166 26.5886   3
  11   9  -1 367.919 29.0428   1
   9 -20  -1 402.439 24.2402   2
   9 -20  -1 369.492 23.9645   2
 -20  11  -1 337.842 26.0071   2
 -11  -9   1 376.393 28.3665   2
  20 -11   1 310.645 25.9220   2
 -11  -9   1 350.252 27.3720   3
  -9  20   1 397.357 26.0833   1
  -9  20   1 417.032 27.4996   3
   6 -20  -1 49.1521 6.58386   3
  14   6  -1 38.5237 8.41180   1
  14   6  -1 41.6662 6.55667   2
   6 -20  -1 46.2665 6.53604   1
  14   6  -1 41.5615 7.58282   3
   6 -20  -1 44.2585 5.03458   2
 -20  14  -1 32.8915 5.07015   2
  -6  20   1 40.4842 6.07136   3
  -6  20   1 30.6676 4.92116   1
 -14  -6   1 34.3186 5.79154   3
  -6  20   1 35.8152 4.46786   2
 -14  -6   1 40.2622 8.18564   2
  20 -14   1 27.8631 4.66126   2
 -20  17  -1 511.856 35.3451   2
  17   3  -1 511.717 40.7153   1
   3 -20  -1 550.577 36.3508   2
  17   3  -1 502.029 38.3093   2
   3 -20  -1 579.563 38.4994   1
   3 -20  -1 552.750 37.8641   3
  17   3  -1 510.979 36.5895   3
  -3  20   1 599.884 39.1687   3
 -17  -3   1 532.010 39.2411   2
  20 -17   1 527.155 36.1545   2
  -3  20   1 547.680 37.7516   1
 -17  -3   1 535.000 37.4105   3
  20 -17   1 528.507 34.0774   3
  20 -17   1 541.616 34.0811   3
  -3  20   1 549.082 36.6351   2
   0 -20  -1 -1.9099 1.26343   2
   0 -20  -1 -3.4660 1.18658   3
  20   0  -1 1.00784 1.53131   3
 -20  20  -1 0.22855 1.28769   2
   0 -20  -1 -0.7213 1.83453   1
 -20   0   1 -1.2891 1.67619   2
  20 -20   1 0.72326 1.22859   3
 -20   0   1 3.00100 2.23683   3
  20 -20   1 -1.3785 0.91125   2
  20 -20   1 0.41014 1.19018   3
   0  20   1 -1.1010 1.45158   2
  -3 -20  -1 160.654 16.9347   1
  23  -3  -1 153.311 13.7278   3
  -3 -20  -1 178.896 16.7635   3
  -3 -20  -1 165.885 15.3862   2
 -20  23  -1 191.426 12.9608   2
  20 -23   1 201.848 15.1508   3
 -23   3   1 200.792 18.6382   2
 -23   3   1 179.546 15.4051   3
   3  20   1 197.906 17.3430   2
  20 -23   1 224.709 16.8218   1
  20 -23   1 189.193 14.5505   2
  20 -23   1 227.206 15.4883   3
  -6 -20  -1 354.123 30.8405   1
  -6 -20  -1 382.985 29.0576   2
  -6 -20  -1 373.251 29.8355   3
 -26   6   1 399.781 30.7553   2
 -26   6   1 372.048 26.6778   3
   6  20   1 377.484 31.0152   1
  20 -26   1 398.936 28.4838   1
 -26   6   1 358.276 26.3726   3
  20 -26   1 394.147 27.5017   3
  20 -26   1 412.860 27.7113   3
  20 -26   1 402.126 26.0462   2
  20 -26   1 395.912 26.1121   2
  -9 -20  -1 200.070 19.5548   3
  -9 -20  -1 192.331 20.9972   1
  -9 -20  -1 211.740 19.3957   2
 -29   9   1 192.036 19.0702   2
  20 -29   1 198.961 14.4102   2
  20 -29   1 209.753 17.5310   1
  20 -29   1 228.715 14.9046   2
 -29   9   1 184.256 14.4097   3
   9  20   1 203.895 20.6450   1
  20 -29   1 234.342 17.4595   3
 -29   9   1 191.269 14.5263   3
 -12 -20  -1 23.2766 7.97114   1
 -12 -20  -1 23.5697 7.72562   2
 -12 -20  -1 31.7011 8.60995   3
  20 -32   1 31.3831 7.14769   3
  20 -32   1 38.9558 4.35522   2
 -32  12   1 38.1236 8.83364   2
  20 -32   1 32.4129 3.90661   2
  20 -32   1 34.2542 6.76869   1
  12  20   1 32.6422 9.01745   1
 -15 -20  -1 92.8552 14.0487   3
 -15 -20  -1 114.233 14.8817   2
  20 -35   1 143.776 10.2172   2
  15  20   1 125.703 17.4861   1
  20 -35   1 133.828 14.7098   1
  20 -35   1 137.167 14.1863   3
 -35  15   1 106.258 14.2407   2
  20 -35   1 133.736 10.2219   2
 -18 -20  -1 237.114 24.1319   2
 -18 -20  -1 207.001 22.9058   3
  20 -38   1 212.602 15.5387   2
  20 -38   1 246.701 22.7730   1
  18  20   1 272.512 26.6636   1
  20 -38   1 239.685 21.0580   3
  20 -38   1 214.854 15.5507   2
 -38  18   1 219.138 22.1312   2
 -21 -20  -1 28.3025 9.50018   2
 -21 -20  -1 26.1178 9.32033   3
 -41  21   1 25.1690 7.77975   2
  21  20   1 20.1082 9.54687   1
  20 -41   1 17.4703 7.00158   3
  20 -41   1 26.7194 3.37364   2
  20 -41   1 19.3281 7.99886   1
  20 -41   1 21.5613 3.14882   2
 -21 -17  -1 191.744 21.0504   3
 -21 -17  -1 193.269 22.3871   2
 -38  21   1 209.764 20.2372   2
  21  17   1 221.993 25.0732   1
  17 -38   1 225.893 21.4716   1
  17 -38   1 201.869 15.8352   2
  17 -38   1 230.875 21.1629   3
 -21 -14  -1 176.559 18.8469   3
 -21 -14  -1 155.499 19.1352   2
  21  14   1 170.775 20.8984   1
 -35  21   1 175.522 16.2461   2
  14 -35   1 152.978 13.3634   2
  14 -35   1 175.635 17.5554   1
  14 -35   1 147.016 17.7066   3
  14 -35   1 163.204 13.2691   2
 -21 -11  -1 102.307 13.9822   2
 -21 -11  -1 85.9082 12.1096   3
  11 -32   1 109.172 10.3690   2
 -32  21   1 102.346 11.4905   2
  21  11   1 120.151 16.6482   1
  11 -32   1 112.843 13.3726   3
  11 -32   1 117.770 11.0300   2
  11 -32   1 136.984 14.3068   1
  -8  29  -1 163.522 13.5490   1
  29 -21  -1 153.880 17.8999   2
  -8  29  -1 173.119 14.1140   2
 -21  -8  -1 142.301 17.1701   2
 -21  -8  -1 165.327 16.2650   3
   8 -29   1 144.568 13.9392   2
  21   8   1 154.882 18.5849   1
 -29  21   1 151.416 13.8641   2
   8 -29   1 184.553 17.1464   3
   8 -29   1 204.299 17.5374   1
  26 -21  -1 106.146 9.92573   2
 -21  -5  -1 103.035 11.5890   3
 -21  -5  -1 101.517 13.3159   2
  -5  26  -1 114.374 10.7368   1
  -5  26  -1 106.385 10.8243   2
   5 -26   1 124.385 13.0349   1
   5 -26   1 95.2438 10.5802   2
 -26  21   1 88.2183 9.17173   2
   5 -26   1 114.842 12.9093   3
  21   5   1 106.837 14.3336   1
 -21  -2  -1 113.996 13.0427   2
  -2  23  -1 97.5055 11.9697   2
  23 -21  -1 114.848 11.5910   1
  23 -21  -1 89.0930 8.70101   2
 -21  -2  -1 119.471 11.1436   3
  23 -21  -1 103.963 7.27681   3
  -2  23  -1 82.8300 10.2249   1
  23 -21  -1 110.900 7.53125   3
   2 -23   1 79.0231 11.2863   1
  21   2   1 92.6775 13.4090   1
 -23  21   1 109.339 8.82218   2
  21   2   1 117.754 11.0135   3
   2 -23   1 99.1590 10.7678   2
   2 -23   1 107.952 12.3513   3
 -21   1  -1 283.779 21.0881   3
  20 -21  -1 291.191 19.6510   3
   1  20  -1 289.786 24.0572   1
  20 -21  -1 263.519 19.3399   2
   1  20  -1 263.793 22.3925   2
  20 -21  -1 306.689 19.6430   3
 -21   1  -1 304.173 23.9979   2
  20 -21  -1 302.729 22.5384   1
  -1 -20   1 328.311 24.5456   3
  21  -1   1 289.428 26.0098   1
 -20  21   1 269.407 19.1948   2
  -1 -20   1 290.964 22.8357   2
  -1 -20   1 294.746 24.0416   1
  21  -1   1 279.187 21.2012   3
  17 -21  -1 110.187 10.8949   1
  17 -21  -1 109.699 7.99448   2
 -21   4  -1 120.647 12.1669   2
 -21   4  -1 114.302 9.50918   3
   4  17  -1 105.677 11.5446   2
  17 -21  -1 122.251 9.65589   3
  21  -4   1 112.570 9.87798   3
  -4 -17   1 101.438 11.7706   2
 -17  21   1 137.952 10.7487   3
  -4 -17   1 118.102 13.0047   1
  21  -4   1 113.233 11.9776   2
  -4 -17   1 120.065 12.8251   3
   7  14  -1 206.720 18.3915   2
  14 -21  -1 242.017 16.9991   3
 -21   7  -1 223.496 15.3356   3
  14 -21  -1 218.415 14.2349   2
 -21   7  -1 197.808 17.8297   2
   7  14  -1 219.054 18.8491   3
   7  14  -1 240.946 19.7641   1
  14 -21  -1 221.732 17.7658   1
  14 -21  -1 221.222 14.3258   2
  -7 -14   1 212.833 19.5450   1
  21  -7   1 225.951 18.1960   2
  -7 -14   1 215.577 18.8358   2
  -7 -14   1 237.791 19.3431   3
 -14  21   1 244.569 17.5683   3
  21  -7   1 201.512 15.2782   3
  10  11  -1 288.764 23.6608   1
 -21  10  -1 286.119 17.6916   3
  10  11  -1 246.000 21.5624   3
  11 -21  -1 279.998 20.9311   3
 -21  10  -1 273.347 21.1951   2
  11 -21  -1 287.148 18.2317   2
  10  11  -1 258.745 21.9084   2
  11 -21  -1 263.076 21.0646   1
 -10 -11   1 301.268 23.0467   2
 -10 -11   1 273.245 22.1280   3
 -11  21   1 301.717 21.5764   3
  21 -10   1 262.384 21.2609   2
  21 -10   1 247.943 17.5958   3
 -11  21   1 301.614 20.3652   1
  13   8  -1 842.214 61.9103   3
  13   8  -1 809.300 62.3893   2
   8 -21  -1 1126.96 62.7844   3
  13   8  -1 912.993 64.7450   1
 -21  13  -1 826.978 60.6960   2
   8 -21  -1 1027.84 59.6553   2
   8 -21  -1 1012.20 62.5059   1
 -13  -8   1 980.199 68.0861   2
  21 -13   1 853.619 65.2514   2
 -13  -8   1 917.705 66.6799   3
  -8  21   1 1147.29 67.5835   3
  -8  21   1 1107.99 65.7735   1
  -8  21   1 1074.65 64.1680   2
 -21  16  -1 447.137 30.1614   2
   5 -21  -1 456.343 29.9872   2
  16   5  -1 390.654 31.6489   3
   5 -21  -1 493.343 32.4114   3
   5 -21  -1 409.930 31.8628   1
  16   5  -1 430.746 34.4040   1
  -5  21   1 509.421 32.2909   2
 -16  -5   1 447.291 33.5954   3
  -5  21   1 518.120 34.9035   3
  21 -16   1 422.133 32.0977   2
  -5  21   1 488.605 33.2588   1
 -16  -5   1 477.389 35.4034   2
   2 -21  -1 116.045 12.0698   3
  19   2  -1 115.421 14.0527   1
   2 -21  -1 117.412 10.5978   2
 -21  19  -1 100.699 9.25665   2
   2 -21  -1 137.225 12.9595   1
  19   2  -1 94.7098 10.3437   3
  21 -19   1 117.108 10.0375   2
 -19  -2   1 113.411 12.8850   2
  -2  21   1 126.753 11.9557   1
  21 -19   1 112.545 8.47803   3
  -2  21   1 114.092 10.7182   2
 -19  -2   1 105.389 10.9025   3
  21 -19   1 122.876 8.56032   3
  -1 -21  -1 298.432 25.4381   1
  22  -1  -1 285.913 22.5133   3
 -21  22  -1 299.379 21.1935   2
  -1 -21  -1 344.935 25.5675   3
  -1 -21  -1 320.165 23.7547   2
  21 -22   1 339.162 21.9722   3
  21 -22   1 316.133 22.1868   2
 -22   1   1 330.331 26.3517   2
  21 -22   1 318.721 21.9439   3
  21 -22   1 317.245 23.9621   1
   1  21   1 310.798 24.2834   2
 -22   1   1 305.762 23.1995   3
  -4 -21  -1 60.8615 8.52453   2
  -4 -21  -1 58.9538 9.80002   1
 -21  25  -1 56.7806 5.70141   2
  -4 -21  -1 58.8896 9.33914   3
 -25   4   1 53.4225 6.51628   3
  21 -25   1 56.5144 6.42535   3
 -25   4   1 61.7770 9.75270   2
  21 -25   1 56.6897 5.73336   2
  21 -25   1 68.2281 7.91402   1
   4  21   1 53.7659 8.27880   2
  21 -25   1 60.0726 6.60812   3
  -7 -21  -1 141.984 14.8883   2
  -7 -21  -1 134.034 16.3523   1
  -7 -21  -1 150.968 15.9442   3
  21 -28   1 166.165 11.6264   2
  21 -28   1 163.121 14.2539   1
   7  21   1 170.025 17.2462   1
 -28   7   1 145.135 12.0260   3
  21 -28   1 144.821 13.0593   3
  21 -28   1 148.761 13.2009   3
  21 -28   1 158.080 11.6542   2
 -28   7   1 138.265 11.8204   3
 -28   7   1 159.206 16.1565   2
 -10 -21  -1 49.0569 12.0735   1
 -10 -21  -1 40.9252 10.0268   3
 -10 -21  -1 52.6411 9.22859   2
 -31  10   1 53.2421 10.7170   2
  21 -31   1 61.5993 8.22823   1
  21 -31   1 48.5236 4.87123   2
  10  21   1 42.4236 10.8703   1
  21 -31   1 56.6267 5.29680   2
  21 -31   1 44.9310 7.29865   3
 -31  10   1 44.0733 4.86280   3
 -31  10   1 42.5664 4.88443   3
  21 -31   1 56.2561 8.03104   3
 -13 -21  -1 165.986 19.9773   1
 -13 -21  -1 143.700 17.4139   3
 -13 -21  -1 172.653 18.1520   2
  21 -34   1 186.987 17.2984   1
 -34  13   1 176.137 18.3349   2
  21 -34   1 166.245 12.5407   2
  21 -34   1 175.522 12.6972   2
  13  21   1 200.364 21.3565   1
  21 -34   1 189.046 16.7109   3
 -16 -21  -1 265.806 26.3778   3
 -16 -21  -1 281.176 26.9881   2
  21 -37   1 270.496 24.8785   1
 -37  16   1 307.907 33.1125   2
  21 -37   1 287.984 23.9089   3
  21 -37   1 265.162 18.3332   2
  21 -37   1 275.603 18.3810   2
  16  21   1 262.692 27.9994   1
 -19 -21  -1 101.410 16.2891   2
 -19 -21  -1 133.833 17.3533   3
  19  21   1 121.617 18.4076   1
  21 -40   1 104.792 8.05605   2
 -40  19   1 133.760 15.4756   2
  21 -40   1 107.760 9.92054   2
  21 -40   1 121.109 14.1705   3
  21 -40   1 108.881 14.6787   1
 -22 -21  -1 55.6003 13.2870   2
 -22 -21  -1 54.5580 13.0704   3
 -43  22   1 58.3450 10.7386   2
  21 -43   1 79.9972 12.2140   1
  21 -43   1 68.0755 11.1720   3
  22  21   1 68.1378 15.6402   1
  21 -43   1 48.3705 3.63089   2
 -22 -18  -1 12.9887 6.77210   3
 -22 -18  -1 3.75472 5.35558   2
  22  18   1 13.9150 8.37888   1
  18 -40   1 12.3355 3.35197   2
  18 -40   1 4.09155 5.14011   1
 -40  22   1 8.60654 4.70865   2
  18 -40   1 10.8680 3.18247   2
  18 -40   1 22.8194 7.59413   3
 -22 -15  -1 100.079 14.5424   3
 -22 -15  -1 82.2250 14.9364   2
  15 -37   1 83.4335 12.6773   3
  22  15   1 110.962 17.2601   1
  15 -37   1 87.8695 8.99985   2
 -37  22   1 129.349 13.1677   2
  15 -37   1 109.047 13.5638   1
  15 -37   1 77.3846 8.59219   2
 -22 -12  -1 35.5152 10.3041   2
 -22 -12  -1 54.0860 10.4995   3
  12 -34   1 48.6158 6.74555   2
 -34  22   1 62.3302 8.56543   2
  12 -34   1 65.6379 10.1667   1
  22  12   1 40.3466 11.4449   1
  12 -34   1 58.5670 15.7280   3
  12 -34   1 51.5286 6.58811   2
 -22  -9  -1 150.901 16.8578   2
 -22  -9  -1 130.925 14.6325   3
  -9  31  -1 137.333 11.9283   1
  31 -22  -1 115.201 12.1293   2
  22   9   1 156.481 18.2953   1
 -31  22   1 136.474 12.6192   2
   9 -31   1 121.835 12.2086   2
   9 -31   1 132.394 11.9788   2
   9 -31   1 147.419 15.1118   3
   9 -31   1 114.074 14.0345   1
  -6  28  -1 20.0075 5.89924   2
  -6  28  -1 26.9098 4.95205   1
 -22  -6  -1 16.3965 5.46801   3
 -22  -6  -1 10.8728 5.94310   2
  28 -22  -1 21.8185 4.88111   2
 -28  22   1 19.6959 4.55482   2
   6 -28   1 21.8622 6.72733   1
   6 -28   1 18.0337 5.01006   2
  22   6   1 34.4918 12.8890   1
   6 -28   1 21.8461 6.91992   3
 -22  -3  -1 65.0804 8.57912   3
  25 -22  -1 62.7192 6.99925   2
 -22  -3  -1 76.1058 11.0578   2
  -3  25  -1 85.1346 9.21979   1
   3 -25   1 101.186 11.7347   3
   3 -25   1 59.9320 8.60702   2
  22   3   1 80.9134 12.8310   1
   3 -25   1 77.0743 10.5017   1
  22   3   1 68.7739 8.77917   3
 -25  22   1 69.3133 7.09048   2
   0  22  -1 -0.2357 2.12999   1
  22 -22  -1 -1.3923 0.86696   3
   0  22  -1 -3.0778 1.22606   2
  22 -22  -1 1.70478 1.51843   2
 -22   0  -1 0.26764 3.29746   2
  22 -22  -1 1.93176 2.50993   1
 -22   0  -1 1.15940 2.19429   3
  22 -22  -1 1.25606 1.33045   3
  22   0   1 -4.3835 2.28601   1
 -22  22   1 -0.6717 1.19579   2
  22   0   1 -0.3639 1.71024   3
   0 -22   1 0.99237 2.89937   3
   0 -22   1 0.92289 2.65875   2
   0 -22   1 -1.0517 2.09130   1
   3  19  -1 624.305 45.6982   2
  19 -22  -1 662.229 41.8877   2
  19 -22  -1 698.568 45.5420   1
 -22   3  -1 657.069 43.6268   3
  19 -22  -1 711.230 43.2157   3
 -22   3  -1 667.198 46.8282   2
   3  19  -1 601.141 45.8506   1
 -19  22   1 682.969 43.4876   2
 -19  22   1 830.751 46.1391   3
  22  -3   1 623.882 45.3583   3
  -3 -19   1 601.771 48.5897   1
  -3 -19   1 699.190 48.1101   2
  -3 -19   1 704.770 49.0458   3
  16 -22  -1 69.1942 6.51187   3
 -22   6  -1 46.0562 7.26600   2
  16 -22  -1 55.1324 7.18154   1
  16 -22  -1 48.7846 4.02401   2
 -22   6  -1 54.7900 5.35924   3
   6  16  -1 34.7648 10.3120   1
   6  16  -1 41.4847 7.11172   2
  16 -22  -1 49.8946 3.88576   2
  -6 -16   1 48.2853 7.78809   3
  22  -6   1 39.1724 4.63691   3
  22  -6   1 38.5739 6.60793   2
  -6 -16   1 47.9716 7.57762   2
  -6 -16   1 37.6968 7.54775   1
  13 -22  -1 2596.13 148.390   2
  13 -22  -1 2440.17 148.227   2
 -22   9  -1 2293.89 148.550   3
  13 -22  -1 2581.82 151.524   3
   9  13  -1 2215.51 152.839   2
   9  13  -1 2221.91 154.710   3
  13 -22  -1 2493.23 152.264   1
   9  13  -1 2495.33 154.827   1
 -22   9  -1 2341.76 152.316   2
  -9 -13   1 2432.89 145.174   2
  22  -9   1 2177.63 139.665   3
  22  -9   1 2260.77 143.370   2
  -9 -13   1 2245.74 144.383   3
  -9 -13   1 2241.39 145.749   1
 -22  12  -1 68.4688 8.61488   2
  10 -22  -1 83.5584 6.80665   2
  10 -22  -1 89.9776 9.59233   1
  12  10  -1 85.7626 11.2176   1
  10 -22  -1 92.4890 9.61367   3
  10 -22  -1 93.4011 7.11335   2
  12  10  -1 71.5646 10.6453   2
 -12 -10   1 74.7410 9.53095   3
 -12 -10   1 77.1205 10.1762   2
  22 -12   1 54.7960 7.81842   2
 -10  22   1 83.8355 9.36128   3
 -10  22   1 88.8363 8.21704   1
   7 -22  -1 158.383 13.8408   3
   7 -22  -1 145.738 11.5935   2
 -22  15  -1 139.018 12.3702   2
   7 -22  -1 156.076 14.0185   1
  15   7  -1 208.761 21.4724   1
  15   7  -1 120.826 12.8894   3
 -15  -7   1 162.828 15.1600   2
  -7  22   1 146.067 11.2883   2
  -7  22   1 134.785 12.1165   1
  -7  22   1 150.297 13.6942   3
 -15  -7   1 143.224 13.4763   3
  22 -15   1 122.873 11.9388   2
  18   4  -1 111.247 14.1868   1
  18   4  -1 96.0209 10.5758   3
   4 -22  -1 95.5308 9.74433   2
   4 -22  -1 127.267 12.5018   1
 -22  18  -1 106.684 9.69046   2
   4 -22  -1 150.487 12.9512   3
  22 -18   1 107.160 9.66191   2
  -4  22   1 119.397 10.0883   2
 -18  -4   1 86.0334 10.2634   3
  22 -18   1 105.218 6.94846   3
 -18  -4   1 116.064 12.7341   2
  -4  22   1 127.292 11.1686   1
  22 -18   1 102.628 6.94052   3
 -22  21  -1 333.074 22.2272   2
   1 -22  -1 311.889 23.6938   2
  21   1  -1 288.848 23.3382   3
   1 -22  -1 305.006 25.7240   1
   1 -22  -1 351.592 26.0198   3
  21   1  -1 300.469 27.5060   1
  22 -21   1 319.666 20.4404   3
  -1  22   1 289.415 22.8141   2
 -21  -1   1 278.050 22.5705   3
 -21  -1   1 340.291 25.9094   2
  -1  22   1 283.521 23.6752   1
  22 -21   1 309.656 20.2491   3
  22 -21   1 303.392 21.5908   2
  24  -2  -1 121.587 10.6131   3
  -2 -22  -1 108.509 11.4495   2
  -2 -22  -1 82.0137 11.7162   3
 -22  24  -1 106.025 8.80637   2
  -2 -22  -1 82.9203 14.2160   1
 -24   2   1 107.407 12.7941   2
  22 -24   1 110.852 9.07241   2
  22 -24   1 105.047 9.08326   3
   2  22   1 113.516 11.5571   2
 -24   2   1 92.2628 9.84635   3
  22 -24   1 115.749 10.9484   1
  22 -24   1 99.8583 8.94922   3
  -5 -22  -1 196.883 20.8486   1
  -5 -22  -1 215.669 20.2770   3
  -5 -22  -1 227.361 19.4794   2
 -27   5   1 214.083 16.4119   3
  22 -27   1 211.082 16.4627   3
  22 -27   1 231.634 18.0263   1
 -27   5   1 217.471 20.1678   2
  22 -27   1 220.983 15.3098   2
  22 -27   1 205.786 16.3802   3
 -27   5   1 189.493 15.9066   3
  -8 -22  -1 122.819 17.4056   3
  -8 -22  -1 76.4783 12.8840   1
  -8 -22  -1 83.8756 11.3652   2
 -30   8   1 100.377 13.3327   2
  22 -30   1 103.903 8.35404   2
  22 -30   1 118.265 11.8010   1
  22 -30   1 114.680 10.7938   3
 -30   8   1 92.8032 8.83433   3
 -30   8   1 90.3588 8.81365   3
  22 -30   1 104.139 8.58320   2
   8  22   1 110.165 14.1897   1
  22 -30   1 121.595 11.1597   3
 -11 -22  -1 69.6729 11.4463   2
 -11 -22  -1 72.0354 13.0637   1
 -11 -22  -1 90.9405 12.7765   3
  22 -33   1 73.4719 6.32796   2
 -33  11   1 58.9564 10.2542   2
  22 -33   1 76.1272 9.29700   3
  11  22   1 69.1860 11.9047   1
 -33  11   1 73.5047 6.05650   3
 -33  11   1 71.6254 6.02103   3
  22 -33   1 66.6947 6.06083   2
  22 -33   1 64.8792 9.34620   1
 -14 -22  -1 112.017 16.3699   3
 -14 -22  -1 135.778 17.0625   2
  22 -36   1 129.500 9.64086   2
  22 -36   1 141.255 15.8837   1
  22 -36   1 146.560 10.3197   2
 -36  14   1 123.040 21.0278   2
  22 -36   1 116.825 13.6884   3
  14  22   1 125.299 18.0685   1
 -17 -22  -1 324.830 29.9505   2
 -17 -22  -1 296.769 29.0259   3
  22 -39   1 302.965 19.7004   2
  17  22   1 330.365 30.9814   1
  22 -39   1 267.559 18.3743   2
 -39  17   1 311.615 26.6721   2
  22 -39   1 295.221 26.4758   1
  22 -39   1 279.706 24.4766   3
 -20 -22  -1 4.65096 4.96248   3
 -20 -22  -1 0.55100 4.20661   2
  22 -42   1 1.90193 3.89349   1
 -42  20   1 6.18793 4.82932   2
  22 -42   1 8.77777 5.83575   3
  20  22   1 13.4646 7.95568   1
 -23 -22  -1 211.274 24.5597   2
 -23 -22  -1 197.655 23.7863   3
  23  22   1 274.006 28.7795   1
  22 -45   1 161.262 19.9438   3
 -45  23   1 212.418 21.5720   2
  22 -45   1 195.619 21.8168   1
 -23 -19  -1 8.01451 6.91332   2
 -23 -19  -1 18.8586 8.32524   3
  19 -42   1 14.9703 3.13402   2
  19 -42   1 14.9992 3.05421   2
  19 -42   1 28.6321 8.52176   3
  23  19   1 14.7540 8.37705   1
 -42  23   1 9.26537 5.29912   2
 -23 -16  -1 9.18734 6.92000   2
 -23 -16  -1 13.3290 7.34766   3
  16 -39   1 2.53334 2.29976   2
  16 -39   1 8.29106 2.91155   2
  16 -39   1 2.64567 4.20803   1
 -39  23   1 5.55218 5.03197   2
  23  16   1 3.99654 5.16254   1
  16 -39   1 7.39162 5.07337   3
 -23 -13  -1 281.258 28.5114   2
 -23 -13  -1 302.672 26.9269   3
  13 -36   1 327.055 26.8381   1
 -36  23   1 302.251 24.1825   2
  13 -36   1 297.527 26.1759   3
  13 -36   1 272.057 21.7190   2
  13 -36   1 276.420 21.4328   2
  23  13   1 292.753 29.5725   1
  33 -23  -1 39.4470 7.51616   2
 -10  33  -1 43.1222 6.81644   1
 -23 -10  -1 45.6779 10.1030   3
 -23 -10  -1 32.5618 9.76444   2
  10 -33   1 47.8110 10.3889   1
  10 -33   1 44.8114 6.56771   2
  10 -33   1 49.8812 10.2388   2
 -33  23   1 49.1366 7.28559   2
  10 -33   1 47.8770 15.8130   3
  23  10   1 32.0777 9.57113   1
  30 -23  -1 11.1745 3.93297   2
 -23  -7  -1 15.3910 5.90616   3
  -7  30  -1 15.7382 4.41226   1
 -23  -7  -1 15.2806 7.42146   2
   7 -30   1 16.6086 5.97444   1
   7 -30   1 17.4349 4.66415   2
  23   7   1 22.3329 7.23669   1
 -30  23   1 17.6992 4.39337   2
   7 -30   1 10.3849 4.94949   3
 -23  -4  -1 281.504 22.8720   3
  27 -23  -1 272.867 20.6922   2
  -4  27  -1 287.385 22.3444   2
 -23  -4  -1 294.208 25.5385   2
  -4  27  -1 287.787 22.2160   1
   4 -27   1 270.022 22.3326   2
  23   4   1 273.741 26.8579   1
   4 -27   1 269.657 24.1429   1
 -27  23   1 283.347 20.4651   2
   4 -27   1 313.473 25.0936   3
 -23  -1  -1 635.327 46.7836   2
  24 -23  -1 654.503 45.1958   1
  -1  24  -1 624.580 44.4642   2
  24 -23  -1 679.839 40.8253   3
  -1  24  -1 667.031 45.0403   1
 -23  -1  -1 650.172 43.9280   3
  24 -23  -1 622.267 40.4437   3
  24 -23  -1 599.699 41.6241   2
  23   1   1 577.537 44.8438   3
   1 -24   1 733.136 46.6844   2
  23   1   1 697.110 51.1247   1
 -24  23   1 656.283 42.8913   2
   1 -24   1 657.414 48.1651   1
   1 -24   1 699.067 48.2453   3
 -23   2  -1 107.418 10.0983   3
   2  21  -1 106.109 11.5739   2
  21 -23  -1 120.376 9.19979   3
 -23   2  -1 111.594 12.7876   2
  21 -23  -1 111.671 11.4484   1
  21 -23  -1 98.5255 8.28543   2
  21 -23  -1 113.795 9.15939   3
  -2 -21   1 108.686 11.7271   2
  -2 -21   1 111.980 12.7280   3
 -21  23   1 105.854 7.98928   2
  23  -2   1 94.2420 9.64311   3
  -2 -21   1 103.754 12.5947   1
   5  18  -1 64.2974 9.07298   2
  18 -23  -1 73.2010 7.39196   3
  18 -23  -1 74.5593 5.58539   2
  18 -23  -1 75.1997 5.52176   2
  18 -23  -1 86.6601 9.10994   1
 -23   5  -1 76.0112 9.64517   2
 -23   5  -1 71.4841 7.05305   3
 -18  23   1 77.5076 8.04573   3
  -5 -18   1 76.6789 10.3699   1
  23  -5   1 66.5494 6.94382   3
  -5 -18   1 78.4689 9.82350   2
  -5 -18   1 66.9304 9.77173   3
  15 -23  -1 290.338 19.3944   3
  15 -23  -1 241.407 19.8269   1
   8  15  -1 239.214 21.6871   1
  15 -23  -1 255.440 16.0378   2
 -23   8  -1 263.291 20.7411   2
  15 -23  -1 248.214 15.9833   2
   8  15  -1 222.825 20.4695   2
 -23   8  -1 239.799 17.0488   3
  -8 -15   1 231.589 21.7882   1
  -8 -15   1 237.724 20.8873   3
 -15  23   1 291.621 19.9309   3
  -8 -15   1 225.918 20.7892   2
  23  -8   1 236.198 20.0423   2
  23  -8   1 247.686 17.0745   3
  11  12  -1 3409.23 212.088   1
  12 -23  -1 3374.16 205.295   2
  12 -23  -1 3254.14 208.920   1
 -23  11  -1 3388.16 204.532   3
  12 -23  -1 3361.76 205.297   2
 -23  11  -1 3249.52 208.818   2
  23 -11   1 3084.57 213.192   2
 -12  23   1 3739.96 212.621   1
 -11 -12   1 3384.73 215.424   2
 -11 -12   1 3388.86 214.841   3
 -12  23   1 3480.53 216.132   3
   9 -23  -1 830.650 53.2288   2
   9 -23  -1 818.607 56.2052   1
  14   9  -1 836.168 59.5801   3
  14   9  -1 872.289 59.4649   1
   9 -23  -1 862.448 56.1987   3
 -23  14  -1 796.323 55.0374   2
  23 -14   1 754.552 53.0937   2
 -14  -9   1 790.777 54.6834   3
 -14  -9   1 868.147 56.3908   2
  -9  23   1 837.161 52.8218   1
  -9  23   1 765.661 54.2104   3
   6 -23  -1 170.154 15.5711   1
 -23  17  -1 150.756 13.2654   2
  17   6  -1 169.801 17.5340   1
   6 -23  -1 161.436 15.0568   3
   6 -23  -1 170.837 13.1612   2
  17   6  -1 159.553 14.5921   3
 -17  -6   1 166.967 16.1612   2
  -6  23   1 146.123 13.4934   1
 -17  -6   1 161.752 14.6400   3
  23 -17   1 151.019 13.1668   2
  -6  23   1 173.335 12.9724   2
  20   3  -1 167.504 15.1349   3
   3 -23  -1 195.297 17.2703   1
   3 -23  -1 148.674 14.1045   2
 -23  20  -1 173.281 13.7471   2
   3 -23  -1 237.000 17.9375   3
  20   3  -1 149.488 18.0728   1
  -3  23   1 213.496 16.0548   2
 -20  -3   1 195.569 16.5474   3
 -20  -3   1 176.777 18.0459   2
  23 -20   1 185.648 12.7287   3
  23 -20   1 167.727 14.7264   2
  -3  23   1 226.089 17.4413   1
  23 -20   1 199.662 12.7919   3
   0 -23  -1 0.05020 2.65109   1
   0 -23  -1 -0.7657 2.25481   2
  23   0  -1 -0.0395 1.94448   3
   0 -23  -1 2.09347 2.60771   3
 -23  23  -1 -0.0386 1.33845   2
   0  23   1 0.25409 1.61031   1
 -23   0   1 1.17530 2.25677   3
  23 -23   1 2.57075 1.56009   2
  23 -23   1 1.82351 2.38349   1
   0  23   1 0.72063 2.16427   2
  23 -23   1 1.87464 1.55585   3
 -23   0   1 1.79530 3.54034   2
  -3 -23  -1 313.356 23.0542   2
 -23  26  -1 261.335 18.9066   2
  -3 -23  -1 270.974 23.8673   3
  26  -3  -1 244.744 20.3444   3
  -3 -23  -1 295.470 25.3667   1
  23 -26   1 263.719 21.2471   1
 -26   3   1 296.702 24.4521   2
 -26   3   1 239.594 19.8887   3
  23 -26   1 276.033 19.0238   2
  23 -26   1 276.420 19.5599   3
  -6 -23  -1 43.7444 11.0224   3
  -6 -23  -1 52.5124 10.2192   1
  -6 -23  -1 53.6298 8.81716   2
 -29   6   1 34.9847 5.62050   3
  23 -29   1 51.7789 7.52007   1
 -29   6   1 58.1163 10.0525   2
   6  23   1 65.9056 11.9459   1
  23 -29   1 54.0711 6.70641   3
  23 -29   1 57.1156 6.77206   3
  23 -29   1 51.0607 5.17153   2
 -29   6   1 43.8138 6.01896   3
  23 -29   1 46.7124 5.12557   2
  -9 -23  -1 263.547 24.0057   2
  -9 -23  -1 278.555 25.1071   3
  -9 -23  -1 255.602 26.5757   1
 -32   9   1 288.580 20.6220   3
   9  23   1 295.863 27.4536   1
  23 -32   1 295.468 22.8930   3
  23 -32   1 319.149 20.3042   2
  23 -32   1 324.093 24.4250   1
 -32   9   1 259.928 25.4425   2
  23 -32   1 302.316 20.0005   2
 -32   9   1 274.207 20.5521   3
 -12 -23  -1 98.7615 14.0239   2
 -12 -23  -1 105.450 14.5815   3
 -12 -23  -1 86.0339 15.2226   1
  12  23   1 96.7883 15.4621   1
 -35  12   1 120.488 15.6470   2
  23 -35   1 105.016 13.1423   1
  23 -35   1 154.499 13.4939   3
  23 -35   1 129.696 9.62983   2
  23 -35   1 118.790 8.59865   2
 -35  12   1 104.651 7.89333   3
 -15 -23  -1 150.293 19.2968   3
 -15 -23  -1 178.168 20.3140   2
  15  23   1 194.372 22.4782   1
  23 -38   1 157.224 16.7586   3
  23 -38   1 191.099 19.2606   1
 -38  15   1 183.318 19.4837   2
 -18 -23  -1 44.8218 12.4691   3
 -18 -23  -1 22.6923 8.68869   2
  23 -41   1 31.1329 9.11244   1
 -41  18   1 31.0431 9.49470   2
  23 -41   1 26.9184 7.83415   3
  18  23   1 19.9233 9.01521   1
 -21 -23  -1 406.264 36.7699   3
 -21 -23  -1 397.405 36.7560   2
  23 -44   1 427.541 34.0018   3
 -44  21   1 410.626 34.5470   2
  23 -44   1 409.412 34.8913   1
  21  23   1 364.306 38.7073   1
 -24 -23  -1 531.151 45.1062   2
 -24 -23  -1 475.405 43.2307   3
  23 -47   1 420.726 38.4807   1
  24  23   1 472.546 44.1227   1
  23 -47   1 491.310 38.1725   3
 -47  24   1 448.243 37.8711   2
 -24 -20  -1 74.8895 16.3216   3
 -24 -20  -1 69.8528 15.7573   2
 -44  24   1 65.4381 11.3671   2
  20 -44   1 64.9672 11.7145   3
  20 -44   1 60.6213 13.7070   1
  20 -44   1 59.8558 5.90377   2
  20 -44   1 58.3806 5.28465   2
  24  20   1 73.0611 16.3155   1
 -24 -17  -1 38.8994 11.0124   2
 -24 -17  -1 25.0009 8.53069   3
  17 -41   1 28.5331 4.67542   2
  17 -41   1 50.3494 9.78105   3
 -41  24   1 39.9037 9.15481   2
  24  17   1 50.4719 14.2427   1
  17 -41   1 36.3559 5.11558   2
  17 -41   1 36.7288 10.0199   1
 -24 -14  -1 27.3998 9.64074   2
 -24 -14  -1 39.1729 10.0762   3
  14 -38   1 44.1892 6.27473   2
  14 -38   1 28.4552 8.16102   3
 -38  24   1 48.3379 8.61517   2
  24  14   1 34.9557 11.3030   1
  14 -38   1 38.2028 10.1795   1
 -24 -11  -1 395.140 37.1512   3
 -24 -11  -1 418.243 35.5798   2
  11 -35   1 344.943 30.5126   1
 -35  24   1 380.001 28.3173   2
  11 -35   1 366.170 30.8771   3
  24  11   1 370.939 34.6858   1
  11 -35   1 377.637 27.3483   2
 -24  -8  -1 217.365 19.9032   3
  32 -24  -1 202.605 18.8151   2
  -8  32  -1 206.298 16.7774   1
 -24  -8  -1 200.994 21.6016   2
   8 -32   1 221.967 18.0404   2
  24   8   1 194.661 22.9202   1
 -32  24   1 217.867 17.4433   2
   8 -32   1 202.014 20.2994   1
   8 -32   1 203.634 18.5840   2
   8 -32   1 224.801 22.5467   3
  -5  29  -1 41.4179 7.95598   2
  29 -24  -1 56.6603 6.83518   2
 -24  -5  -1 99.6092 21.8051   2
  -5  29  -1 73.8906 8.22067   1
 -24  -5  -1 49.9140 8.35071   3
   5 -29   1 70.3761 10.6064   1
 -29  24   1 63.3624 7.27787   2
   5 -29   1 81.3831 11.2908   3
  24   5   1 75.3490 12.6607   1
   5 -29   1 59.8852 8.58332   2
 -24  -2  -1 243.457 20.0288   3
  26 -24  -1 244.192 15.7916   3
  26 -24  -1 250.732 15.8652   3
  -2  26  -1 275.670 20.7843   2
  -2  26  -1 224.967 20.1173   1
  26 -24  -1 228.774 17.8222   2
 -24  -2  -1 247.247 22.8727   2
  26 -24  -1 267.439 21.5732   1
   2 -26   1 276.940 21.6274   2
 -26  24   1 247.844 18.3359   2
  24   2   1 303.507 26.9076   1
   2 -26   1 266.606 23.5262   1
  24   2   1 228.636 20.5617   3
   2 -26   1 259.615 23.2433   3
  23 -24  -1 636.629 41.7468   3
 -24   1  -1 691.457 47.6744   2
  23 -24  -1 664.549 42.0329   3
   1  23  -1 620.578 45.2917   2
   1  23  -1 627.804 45.6701   1
 -24   1  -1 646.645 43.8746   3
  23 -24  -1 630.864 41.7337   2
  23 -24  -1 699.677 45.7427   1
 -23  24   1 669.970 42.6178   2
  24  -1   1 623.037 44.9981   3
  -1 -23   1 679.977 48.9239   1
  -1 -23   1 659.181 48.1472   3
  -1 -23   1 683.458 46.9101   2
  24  -1   1 704.283 51.4715   1
  20 -24  -1 363.935 25.8616   1
   4  20  -1 326.266 26.2265   2
 -24   4  -1 314.939 23.4998   3
 -24   4  -1 339.319 27.0305   2
   4  20  -1 342.940 32.0856   1
  -4 -20   1 370.002 28.0872   3
  -4 -20   1 362.820 27.1926   2
  24  -4   1 303.797 23.8813   3
  -4 -20   1 348.738 28.4750   1
 -24   7  -1 158.925 11.9133   3
  17 -24  -1 184.685 13.5286   3
  17 -24  -1 148.433 10.1417   2
  17 -24  -1 159.281 10.2372   2
  17 -24  -1 154.399 14.1264   1
 -24   7  -1 147.664 14.7930   2
  -7 -17   1 126.354 13.8523   2
  -7 -17   1 129.847 14.8914   1
  24  -7   1 137.330 10.7545   3
  -7 -17   1 149.325 14.7969   3
  10  14  -1 80.7218 10.9078   1
 -24  10  -1 60.0499 5.44944   3
 -24  10  -1 58.4575 8.42031   2
  14 -24  -1 76.4175 9.04483   1
  14 -24  -1 70.4428 8.23373   3
  14 -24  -1 69.5952 5.20151   2
  14 -24  -1 77.5587 5.36685   2
  24 -10   1 55.2894 8.45367   2
 -14  24   1 86.7349 10.7871   3
  24 -10   1 54.0126 5.33363   3
 -10 -14   1 80.3938 10.2086   3
 -10 -14   1 59.9226 9.36436   2
 -10 -14   1 77.0256 10.5070   1
  11 -24  -1 2708.75 172.425   1
  11 -24  -1 2714.20 168.584   2
  11 -24  -1 2809.79 168.832   2
  13  11  -1 2665.30 175.283   1
 -24  13  -1 2578.64 171.572   2
  11 -24  -1 2924.36 173.262   3
 -11  24   1 2799.72 168.342   1
 -13 -11   1 2554.20 170.594   3
  24 -13   1 2351.90 168.874   2
 -11  24   1 3042.59 170.868   3
 -13 -11   1 2737.81 171.936   2
   8 -24  -1 46.8732 6.96139   1
  16   8  -1 14.5579 6.13959   1
 -24  16  -1 15.4920 4.26253   2
  16   8  -1 16.6795 5.02329   3
  24 -16   1 16.2131 4.51485   2
  -8  24   1 43.2593 5.58381   1
 -16  -8   1 22.0649 5.88607   3
 -16  -8   1 29.9278 7.33156   2
 -24  19  -1 83.8050 8.88434   2
   5 -24  -1 96.7200 9.27323   2
  19   5  -1 90.4712 10.3023   3
  19   5  -1 102.205 13.5873   1
   5 -24  -1 98.8324 11.2060   3
   5 -24  -1 113.961 11.8636   1
  -5  24   1 95.4955 9.83426   1
 -19  -5   1 80.4346 10.0121   3
  -5  24   1 100.346 9.07064   2
  24 -19   1 78.8066 8.63457   2
 -19  -5   1 90.8488 11.6702   2
  22   2  -1 115.483 14.8427   1
  22   2  -1 102.715 10.7800   3
   2 -24  -1 99.7381 12.4340   1
   2 -24  -1 104.443 12.4657   3
 -24  22  -1 99.1404 9.23420   2
   2 -24  -1 117.291 11.0333   2
 -22  -2   1 106.194 13.2124   2
  24 -22   1 118.822 10.1214   2
 -22  -2   1 119.003 11.5369   3
  24 -22   1 111.876 8.22434   3
  24 -22   1 106.873 8.12004   3
  -2  24   1 101.195 11.7524   2
  -2  24   1 123.636 12.3017   1
  -1 -24  -1 222.000 21.9483   1
  -1 -24  -1 199.690 18.6927   2
  -1 -24  -1 282.481 22.1993   3
  25  -1  -1 201.666 23.1289   3
 -24  25  -1 230.218 16.6411   2
   1  24   1 205.529 19.2079   2
  24 -25   1 243.009 16.9386   3
   1  24   1 228.057 20.5211   1
  24 -25   1 254.528 16.8209   3
 -25   1   1 237.751 21.8907   2
 -25   1   1 231.563 18.5928   3
  24 -25   1 229.834 19.1709   1
  24 -25   1 217.598 17.0112   2
  -4 -24  -1 34.3191 9.67991   1
 -24  28  -1 35.9231 4.49101   2
  -4 -24  -1 27.4796 7.16246   2
  -4 -24  -1 41.4569 9.95418   3
 -28   4   1 38.2170 5.74537   3
  24 -28   1 46.2997 5.81289   3
 -28   4   1 28.5831 7.94489   2
  24 -28   1 34.8478 4.55034   2
  24 -28   1 39.0917 5.55012   3
  24 -28   1 33.3699 6.35364   1
 -28   4   1 39.1085 5.75788   3
  -7 -24  -1 16.1678 6.14924   3
  -7 -24  -1 9.61904 5.81600   1
  -7 -24  -1 24.1873 7.53660   2
 -31   7   1 18.1209 4.32630   3
  24 -31   1 20.3440 6.13780   3
  24 -31   1 18.3715 3.40454   2
  24 -31   1 14.2542 3.03782   2
 -31   7   1 6.96775 5.29171   2
  24 -31   1 14.5296 5.15980   1
 -31   7   1 16.9544 4.14590   3
  24 -31   1 28.8889 5.37506   3
   7  24   1 11.9329 6.08717   1
 -10 -24  -1 138.806 17.1635   3
 -10 -24  -1 134.717 18.5398   1
 -34  10   1 141.719 11.3147   3
  24 -34   1 150.303 10.5920   2
  24 -34   1 142.466 14.8441   1
 -34  10   1 138.580 16.6735   2
  24 -34   1 172.718 14.6462   3
 -34  10   1 130.080 11.1935   3
  24 -34   1 152.842 10.7152   2
  10  24   1 162.215 18.4879   1
 -13 -24  -1 502.067 40.8152   3
 -13 -24  -1 581.264 41.5666   2
 -13 -24  -1 400.353 41.2467   1
  13  24   1 546.242 47.3191   1
 -37  13   1 511.412 44.2716   2
  24 -37   1 623.668 47.0908   1
  24 -37   1 648.248 42.7893   3
 -16 -24  -1 49.5602 13.6372   2
 -16 -24  -1 50.0105 12.9603   3
  24 -40   1 73.7682 10.5652   3
  16  24   1 52.1677 13.9330   1
  24 -40   1 70.4094 11.3140   1
 -40  16   1 67.7202 12.0365   2
 -19 -24  -1 37.9823 11.7597   2
 -19 -24  -1 24.2009 9.17779   3
  19  24   1 14.5934 8.03938   1
  24 -43   1 37.4625 9.80790   1
 -43  19   1 44.5273 10.4502   2
  24 -43   1 27.7297 8.11643   3
 -22 -24  -1 86.5847 15.8832   2
 -22 -24  -1 43.4028 13.0365   3
  22  24   1 46.9936 19.1585   1
  24 -46   1 67.3848 12.9774   1
  24 -46   1 71.8971 12.3263   3
 -46  22   1 78.8353 13.4140   2
 -25 -24  -1 42.8659 12.8947   3
 -25 -24  -1 12.4320 9.07633   2
  24 -49   1 35.3843 10.7542   1
 -49  25   1 21.3112 8.69236   2
  24 -49   1 21.7186 8.48271   3
  25  24   1 30.0203 12.3249   1
 -25 -21  -1 67.2206 16.4344   2
 -25 -21  -1 44.7879 12.1758   3
 -46  25   1 44.9625 10.5861   2
  25  21   1 49.8622 14.4532   1
  21 -46   1 51.2243 12.5223   1
  21 -46   1 97.4423 14.1853   3
 -25 -18  -1 104.525 15.7824   3
 -25 -18  -1 104.806 16.9029   2
  18 -43   1 74.1652 20.5355   1
  25  18   1 112.940 18.3397   1
  18 -43   1 85.5398 13.1809   3
 -43  25   1 90.9331 12.5150   2
  18 -43   1 84.5655 8.03211   2
 -25 -15  -1 16.7585 8.26865   2
 -25 -15  -1 16.0042 7.16381   3
  15 -40   1 10.7545 3.51667   2
  15 -40   1 15.4065 6.76529   1
  25  15   1 16.4578 9.05868   1
 -40  25   1 18.8914 6.09928   2
  15 -40   1 7.84484 3.52356   2
  15 -40   1 27.3113 8.00042   3
 -25 -12  -1 115.004 15.2337   3
 -25 -12  -1 104.667 16.7388   2
  12 -37   1 127.376 15.6286   1
 -37  25   1 122.941 13.1528   2
  12 -37   1 107.996 11.9433   2
  12 -37   1 145.264 16.3768   3
  25  12   1 137.477 19.1129   1
  12 -37   1 116.963 11.7978   2
 -25  -9  -1 151.537 17.6302   2
 -25  -9  -1 115.600 14.3729   3
  -9  34  -1 115.138 11.1749   1
   9 -34   1 145.077 13.3259   2
   9 -34   1 128.689 15.6869   1
  25   9   1 124.509 17.9128   1
 -34  25   1 124.636 12.5442   2
   9 -34   1 145.713 16.2935   3
  31 -25  -1 95.0507 10.2328   2
 -25  -6  -1 115.550 13.0898   3
  -6  31  -1 112.345 12.6993   2
 -25  -6  -1 106.496 14.8533   2
  -6  31  -1 121.113 11.4729   1
   6 -31   1 129.845 14.9736   3
  25   6   1 137.784 17.8599   1
   6 -31   1 123.445 12.5185   2
 -31  25   1 118.264 11.0333   2
   6 -31   1 96.0165 13.7112   1
  28 -25  -1 109.312 12.6160   1
  28 -25  -1 104.733 9.72817   2
 -25  -3  -1 99.1082 11.6905   3
 -25  -3  -1 112.044 16.6813   2
  -3  28  -1 119.501 11.9550   2
  -3  28  -1 107.060 11.5438   1
   3 -28   1 92.1138 11.7192   2
   3 -28   1 133.699 14.6751   1
   3 -28   1 110.359 14.0335   3
 -28  25   1 117.870 10.3788   2
  25   3   1 139.664 17.2958   1
 -25   0  -1 9.86651 3.69448   3
  25 -25  -1 9.42077 4.18296   1
   0  25  -1 -4.6906 2.52372   2
 -25   0  -1 2.15231 3.97742   2
  25 -25  -1 2.48319 1.43705   3
  25 -25  -1 0.96192 1.58628   2
   0  25  -1 -3.2360 1.64685   1
  25   0   1 19.8375 7.90737   1
   0 -25   1 -3.8482 2.05021   1
 -25  25   1 1.64311 1.67316   2
   0 -25   1 3.33438 3.89671   3
  25   0   1 2.28142 2.39477   3
   0 -25   1 -5.1692 2.53965   2
  22 -25  -1 88.3576 9.90610   1
 -25   3  -1 77.6199 10.7639   2
  22 -25  -1 63.9057 6.12871   2
 -25   3  -1 75.5762 8.17348   3
  22 -25  -1 86.6908 7.68226   3
  22 -25  -1 99.6712 7.88978   3
   3  22  -1 62.1426 10.5699   1
 -22  25   1 67.0112 5.54968   2
  25  -3   1 65.0778 7.47640   3
  -3 -22   1 56.0094 10.2552   1
  -3 -22   1 68.0981 9.52921   2
  -3 -22   1 69.5018 10.4825   3
  19 -25  -1 247.400 18.0554   3
  19 -25  -1 250.717 15.2072   2
 -25   6  -1 221.767 17.0241   3
  19 -25  -1 235.311 19.3741   1
  19 -25  -1 225.713 15.0947   2
 -25   6  -1 236.202 20.5962   2
  -6 -19   1 247.551 20.9677   2
  -6 -19   1 207.094 21.3589   1
 -19  25   1 289.005 19.4150   3
  -6 -19   1 230.552 21.1770   3
  25  -6   1 216.743 17.2347   3
 -25   9  -1 49.8035 7.81195   2
   9  16  -1 42.2061 8.22629   1
 -25   9  -1 46.2370 4.78325   3
  16 -25  -1 51.3172 3.77436   2
  16 -25  -1 57.0450 3.84107   2
  -9 -16   1 47.3867 8.33756   3
  -9 -16   1 50.2074 8.51611   2
  25  -9   1 44.0199 4.66290   3
  13 -25  -1 594.759 38.0387   2
  13 -25  -1 640.375 41.7234   3
  12  13  -1 573.223 44.4942   1
 -25  12  -1 550.374 41.5962   2
  13 -25  -1 622.161 38.1487   2
  13 -25  -1 606.130 42.2718   1
 -12 -13   1 579.800 46.4456   3
 -12 -13   1 632.444 47.4866   2
 -13  25   1 702.819 46.2349   3
 -13  25   1 719.391 44.5475   1
  10 -25  -1 50.4390 7.48540   1
  10 -25  -1 34.8439 4.40391   2
  15  10  -1 36.7976 9.19787   1
  10 -25  -1 44.4903 7.17512   3
  10 -25  -1 38.1264 4.60042   2
 -25  15  -1 34.3566 5.99767   2
  25 -15   1 33.2950 5.90218   2
 -15 -10   1 31.3757 7.75263   2
 -10  25   1 43.4647 7.17049   3
 -10  25   1 44.8473 5.92018   1
 -15 -10   1 37.4576 8.13260   3
 -25  18  -1 213.969 16.8414   2
  18   7  -1 205.076 21.3282   1
   7 -25  -1 222.603 19.0599   1
   7 -25  -1 201.273 18.3433   3
 -18  -7   1 195.592 18.3055   3
  25 -18   1 206.760 17.1092   2
 -18  -7   1 242.025 20.6730   2
  -7  25   1 215.261 17.4565   1
  -7  25   1 227.146 16.4520   2
 -25  21  -1 45.6657 6.10302   2
  21   4  -1 54.1486 10.4925   1
   4 -25  -1 58.8404 8.98052   3
   4 -25  -1 58.2588 9.00933   1
  21   4  -1 49.3676 7.46667   3
   4 -25  -1 53.1607 6.89560   2
 -21  -4   1 54.7469 9.59191   2
  -4  25   1 65.2736 8.43925   1
  25 -21   1 55.3627 6.84678   2
 -21  -4   1 52.9948 8.13144   3
  -4  25   1 73.8135 7.84206   2
   1 -25  -1 215.618 18.3311   2
   1 -25  -1 241.664 20.8882   3
  24   1  -1 205.740 18.1725   3
  24   1  -1 228.800 23.3232   1
   1 -25  -1 199.110 20.5920   1
 -25  24  -1 228.873 16.6341   2
  25 -24   1 245.588 16.6474   3
 -24  -1   1 243.044 19.7154   3
  -1  25   1 227.221 19.5626   2
  25 -24   1 237.569 17.9989   2
  25 -24   1 251.864 16.5527   3
  -1  25   1 228.163 20.8566   1
 -24  -1   1 248.449 22.6656   2
  -2 -25  -1 -1.5157 2.74200   2
  -2 -25  -1 1.75869 3.74992   1
  -2 -25  -1 -0.1004 2.99454   3
 -25  27  -1 4.10533 2.06407   2
  25 -27   1 3.33755 2.08487   3
   2  25   1 1.60913 3.02461   1
  25 -27   1 5.71621 2.40788   3
  25 -27   1 5.11930 3.01452   1
  25 -27   1 2.23521 1.65568   2
 -27   2   1 4.57805 3.10101   3
 -27   2   1 2.01501 3.70304   2
  -5 -25  -1 135.001 17.5842   1
  -5 -25  -1 155.089 15.8753   2
  -5 -25  -1 157.663 17.2224   3
  25 -30   1 165.226 12.7478   3
 -30   5   1 135.064 16.3215   2
 -30   5   1 129.083 12.2137   3
  25 -30   1 137.440 12.3984   3
  25 -30   1 136.831 11.0562   2
  25 -30   1 141.780 11.0244   2
  25 -30   1 153.131 14.3588   1
 -30   5   1 139.960 12.3342   3
  -8 -25  -1 101.965 13.9569   3
  -8 -25  -1 67.3107 13.3077   1
  -8 -25  -1 66.9907 11.4124   2
  25 -33   1 82.1382 10.4461   1
   8  25   1 72.4149 12.4767   1
  25 -33   1 73.3861 6.71228   2
  25 -33   1 74.7216 6.55909   2
 -33   8   1 101.174 13.5960   2
  25 -33   1 80.9410 9.53565   3
 -33   8   1 80.1069 9.77042   3
 -33   8   1 74.5358 7.85598   3
  25 -33   1 83.1195 9.47444   3
 -11 -25  -1 70.3974 16.8780   1
 -11 -25  -1 53.6622 12.9581   3
 -11 -25  -1 57.2226 12.1685   2
 -36  11   1 71.3711 6.08923   3
 -36  11   1 67.2686 6.02474   3
  25 -36   1 59.1485 5.27566   2
 -36  11   1 84.3595 12.7550   2
  25 -36   1 56.9457 4.74914   2
  11  25   1 70.0156 13.2531   1
  25 -36   1 72.9843 9.59872   3
 -14 -25  -1 69.3007 13.7799   3
 -14 -25  -1 71.4739 13.5549   2
  25 -39   1 74.3230 10.5056   3
  14  25   1 69.3956 13.6926   1
 -39  14   1 87.0112 13.0347   2
  25 -39   1 62.7868 10.8264   1
 -17 -25  -1 48.6580 12.2823   2
 -17 -25  -1 57.4535 13.1258   3
  25 -42   1 50.0051 10.1555   1
  17  25   1 71.1073 14.0094   1
  25 -42   1 57.1539 10.2936   3
 -42  17   1 47.3012 12.0010   2
 -20 -25  -1 19.6409 9.34660   2
 -20 -25  -1 28.4157 10.7053   3
 -45  20   1 33.9992 10.3399   2
  25 -45   1 35.9100 10.2917   1
  25 -45   1 28.4344 8.65541   3
  20  25   1 18.4710 9.63013   1
 -23 -25  -1 45.7287 15.8194   3
 -23 -25  -1 46.5093 18.8891   2
  25 -48   1 54.2198 12.3818   3
  25 -48   1 73.9325 15.7630   1
 -48  23   1 53.2892 11.9441   2
  23  25   1 8.23899 13.3417   1
 -26 -25  -1 19.1393 10.1397   2
 -26 -25  -1 42.8353 14.1812   3
  25 -51   1 37.9397 10.6947   3
 -51  26   1 33.9895 11.0286   2
 -26 -22  -1 53.1575 14.3924   3
 -26 -22  -1 66.1596 16.4198   2
 -48  26   1 71.2739 12.2075   2
  22 -48   1 52.4410 13.7894   1
  26  22   1 60.5117 16.2706   1
  22 -48   1 44.1958 11.0641   3
 -26 -19  -1 14.5037 8.68570   3
 -26 -19  -1 20.8389 9.70264   2
  19 -45   1 13.2381 2.98993   2
 -45  26   1 6.18637 5.27035   2
  19 -45   1 10.8565 5.52302   1
  19 -45   1 18.9336 7.08895   3
  26  19   1 8.13778 7.03740   1
 -26 -16  -1 26.8309 10.4633   2
 -26 -16  -1 16.8431 7.87506   3
  16 -42   1 13.8759 3.60716   2
  16 -42   1 20.7444 4.38827   2
  16 -42   1 17.8518 7.67901   1
  16 -42   1 17.2804 7.17461   3
  26  16   1 19.8003 10.0469   1
 -42  26   1 3.84521 4.35850   2
 -26 -13  -1 238.420 24.5297   3
 -26 -13  -1 294.519 28.1081   2
  13 -39   1 248.171 24.1703   1
 -39  26   1 248.041 21.4188   2
  13 -39   1 265.746 20.4454   2
  26  13   1 265.139 28.1026   1
  13 -39   1 195.747 22.3609   3
  13 -39   1 255.126 19.5343   2
 -26 -10  -1 106.870 14.5175   3
 -26 -10  -1 118.268 16.9818   2
  10 -36   1 102.190 10.9412   2
  10 -36   1 114.128 14.8096   3
  10 -36   1 108.463 14.2639   1
  10 -36   1 76.6868 9.83875   2
  26  10   1 123.802 17.6464   1
 -36  26   1 92.8872 10.8234   2
  -7  33  -1 75.0163 8.69426   1
 -26  -7  -1 86.5140 13.5543   2
 -26  -7  -1 61.5114 10.3085   3
   7 -33   1 79.9745 9.82767   2
 -33  26   1 87.3169 8.98848   2
   7 -33   1 68.8447 11.5821   3
  26   7   1 74.4119 13.5884   1
   7 -33   1 76.2166 11.9288   1
  30 -26  -1 78.8468 8.36616   2
  -4  30  -1 88.0039 10.0522   1
  30 -26  -1 101.386 11.9983   1
 -26  -4  -1 69.5945 10.1804   3
 -26  -4  -1 95.0697 13.8731   2
  -4  30  -1 65.0260 9.74698   2
  26   4   1 64.8412 13.2324   1
   4 -30   1 78.9451 11.9460   3
   4 -30   1 86.9231 10.6344   2
 -30  26   1 77.6602 8.06160   2
   4 -30   1 86.0588 12.1708   1
  27 -26  -1 179.107 13.0045   3
  27 -26  -1 180.098 14.4705   2
 -26  -1  -1 193.754 20.1919   2
  27 -26  -1 192.099 18.0878   1
  27 -26  -1 239.584 14.1087   3
 -26  -1  -1 181.815 16.7100   3
  -1  27  -1 192.431 17.8206   1
  26   1   1 219.964 22.7439   1
   1 -27   1 200.966 17.8553   2
   1 -27   1 166.507 18.7669   3
 -27  26   1 195.188 14.3228   2
   1 -27   1 187.598 19.5831   1
 -26   2  -1 257.652 23.1503   2
  24 -26  -1 249.280 21.1199   1
  24 -26  -1 247.815 18.0258   3
  24 -26  -1 262.524 17.9171   3
   2  24  -1 276.439 22.2338   1
 -26   2  -1 235.512 19.3536   3
  24 -26  -1 245.963 17.2533   2
  26  -2   1 230.807 20.2824   3
  -2 -24   1 245.585 23.0881   3
  -2 -24   1 289.570 22.5866   2
 -24  26   1 264.960 17.3481   2
  26  -2   1 268.012 26.0325   1
  -2 -24   1 229.893 23.1681   1
   5  21  -1 82.1922 12.4325   1
 -26   5  -1 103.658 9.63589   3
  21 -26  -1 111.309 11.5589   1
  21 -26  -1 110.216 7.66807   2
  21 -26  -1 109.310 7.61294   2
 -26   5  -1 116.630 13.1520   2
  21 -26  -1 120.318 10.0381   3
  -5 -21   1 111.359 13.3655   3
  -5 -21   1 130.575 13.2251   2
  26  -5   1 92.8360 9.35771   3
 -26   8  -1 59.7371 9.53786   2
 -26   8  -1 85.5519 7.32938   3
   8  18  -1 56.5318 9.98214   1
  18 -26  -1 113.695 9.48563   3
  18 -26  -1 92.3071 10.0083   1
  -8 -18   1 59.9449 10.1064   1
  -8 -18   1 75.2283 10.5368   3
  -8 -18   1 59.1669 9.45162   2
  26  -8   1 66.5714 6.40552   3
  15 -26  -1 444.021 29.1700   3
  15 -26  -1 398.994 25.0324   2
 -26  11  -1 376.188 25.1169   3
  15 -26  -1 390.535 29.4856   1
  11  15  -1 384.761 31.9318   1
  15 -26  -1 394.728 24.9898   2
 -26  11  -1 384.173 29.7418   2
 -11 -15   1 388.062 33.3944   3
 -11 -15   1 416.835 34.0632   2
 -15  26   1 523.243 33.3599   3
  12 -26  -1 399.448 27.1385   3
  12 -26  -1 347.478 23.3359   2
  12 -26  -1 359.563 23.2253   2
  12 -26  -1 338.370 26.9558   1
  14  12  -1 337.617 29.5378   1
 -26  14  -1 318.207 26.1157   2
 -12  26   1 387.081 27.7394   1
 -14 -12   1 385.603 31.2633   2
 -14 -12   1 378.878 30.3650   3
 -12  26   1 419.025 30.1451   3
   9 -26  -1 132.485 13.3314   3
 -26  17  -1 134.400 12.2682   2
  17   9  -1 143.375 15.9796   1
   9 -26  -1 137.042 13.7501   1
   9 -26  -1 120.230 10.5613   2
 -17  -9   1 129.106 13.3901   3
  26 -17   1 120.070 11.8439   2
  -9  26   1 128.913 10.4257   2
 -17  -9   1 115.032 13.9942   2
  -9  26   1 132.065 11.7297   1
  20   6  -1 425.106 34.8367   1
   6 -26  -1 402.003 28.8329   2
   6 -26  -1 406.382 31.8389   1
 -26  20  -1 395.559 28.9654   2
   6 -26  -1 439.439 31.9577   3
  26 -20   1 366.548 28.2651   2
 -20  -6   1 384.396 30.0445   3
 -20  -6   1 388.503 32.0160   2
  -6  26   1 430.527 28.3518   2
  -6  26   1 419.918 29.4745   1
  23   3  -1 228.758 21.3276   3
   3 -26  -1 235.427 22.8028   3
   3 -26  -1 289.808 21.5016   2
  23   3  -1 348.029 28.1939   1
 -26  23  -1 283.274 20.1965   2
   3 -26  -1 297.604 24.6672   1
  -3  26   1 254.393 20.7864   2
  26 -23   1 256.949 16.2759   3
 -23  -3   1 315.866 24.7568   2
 -23  -3   1 262.517 20.9977   3
  26 -23   1 232.920 16.1877   3
  26 -23   1 255.812 19.2236   2
  26 -23   1 257.598 16.2786   3
  -3  26   1 275.775 21.7586   1
   0 -26  -1 -2.2023 2.23643   3
   0 -26  -1 -2.1377 2.02976   2
 -26  26  -1 -1.7400 1.70564   2
   0 -26  -1 1.62302 2.98904   1
  26   0  -1 3.09243 4.05025   1
   0  26   1 -0.2715 2.28051   2
  26 -26   1 -1.6763 2.15725   1
 -26   0   1 -0.0292 2.44787   3
   0  26   1 -0.0707 2.41346   1
  26 -26   1 1.63239 1.51680   3
  26 -26   1 -1.1960 1.18633   3
  26 -26   1 0.80635 1.77221   2
 -26   0   1 -1.8500 3.06154   2
  -3 -26  -1 334.235 26.2405   2
  -3 -26  -1 293.339 27.1076   3
  -3 -26  -1 321.528 28.9684   1
 -26  29  -1 319.917 22.0186   2
  26 -29   1 326.752 22.7985   3
  26 -29   1 317.725 22.0882   2
 -29   3   1 307.306 23.4878   3
 -29   3   1 289.318 23.7514   3
   3  26   1 293.801 26.7375   1
  26 -29   1 334.347 22.6848   3
 -29   3   1 336.434 31.0671   2
  26 -29   1 331.230 25.3389   1
  -6 -26  -1 212.202 23.4800   1
  -6 -26  -1 224.303 21.0653   2
  -6 -26  -1 242.565 23.0227   3
  26 -32   1 231.552 18.7081   3
  26 -32   1 250.548 16.7630   2
 -32   6   1 213.481 17.9436   3
  26 -32   1 237.954 18.5937   3
  26 -32   1 245.011 20.7273   1
 -32   6   1 295.033 24.5391   2
  26 -32   1 238.965 16.7851   2
 -32   6   1 220.290 17.9458   3
  -9 -26  -1 501.535 45.9953   1
  -9 -26  -1 553.143 43.7643   3
  -9 -26  -1 589.154 42.9964   2
  26 -35   1 557.299 35.1777   2
  26 -35   1 539.589 41.4620   1
 -35   9   1 523.807 36.5831   3
 -35   9   1 545.908 36.9816   3
   9  26   1 566.867 45.1164   1
 -35   9   1 558.844 43.3216   2
  26 -35   1 593.221 39.2673   3
 -12 -26  -1 122.863 19.5221   1
 -12 -26  -1 148.464 18.9475   3
 -12 -26  -1 189.996 19.5576   2
  12  26   1 145.551 19.3875   1
 -38  12   1 184.367 19.3167   2
  26 -38   1 160.585 15.3804   3
  26 -38   1 133.812 15.8916   1
 -15 -26  -1 187.616 21.5004   2
 -15 -26  -1 174.343 21.5370   3
 -41  15   1 190.709 20.3360   2
  26 -41   1 164.636 17.0574   3
  15  26   1 197.761 23.0117   1
  26 -41   1 165.495 18.2569   1
 -18 -26  -1 64.6668 14.6515   2
 -18 -26  -1 49.9771 13.2491   3
 -44  18   1 46.6290 11.5676   2
  26 -44   1 70.8479 12.3752   1
  26 -44   1 80.5946 11.4329   3
  18  26   1 64.6829 15.5891   1
 -21 -26  -1 80.5599 16.4005   3
 -21 -26  -1 97.0485 16.6084   2
  21  26   1 61.0651 17.6937   1
  26 -47   1 100.287 15.1345   1
  26 -47   1 91.9129 13.6330   3
 -47  21   1 78.1148 14.0994   2
 -24 -26  -1 17.2879 9.59983   2
 -24 -26  -1 9.48031 7.49168   3
  24  26   1 44.6944 16.9288   1
  26 -50   1 8.92687 6.31699   3
 -50  24   1 13.5233 7.46530   2
  26 -50   1 11.6694 6.89043   1
 -27 -26  -1 31.9094 13.3097   2
 -27 -26  -1 29.7003 11.3119   3
  26 -53   1 33.3292 10.6691   3
 -53  27   1 28.4264 9.44315   2
 -27 -23  -1 5.51476 7.42377   3
 -27 -23  -1 -1.0137 4.87809   2
 -50  27   1 3.02340 5.79792   2
  23 -50   1 3.46021 5.25026   1
  23 -50   1 -0.5142 4.87510   3
  27  23   1 1.05816 5.82769   1
 -27 -20  -1 45.5903 19.2467   2
 -27 -20  -1 19.7187 8.54183   3
  27  20   1 20.6932 9.92771   1
  20 -47   1 25.6530 9.28988   1
 -47  27   1 24.4256 8.48250   2
  20 -47   1 45.6029 11.4134   3
 -27 -17  -1 82.7791 14.4343   3
 -27 -17  -1 86.1460 15.9525   2
  17 -44   1 63.9751 12.6549   3
  17 -44   1 79.9630 13.9002   1
  27  17   1 92.7608 19.9708   1
  17 -44   1 76.8706 7.76804   2
  17 -44   1 74.3766 7.92905   2
 -44  27   1 71.7306 13.1867   2
 -27 -14  -1 110.986 15.6729   3
 -27 -14  -1 101.577 16.8323   2
  14 -41   1 79.7557 8.83224   2
  14 -41   1 111.445 14.2555   2
  14 -41   1 106.126 14.5681   1
  14 -41   1 69.7711 12.5277   3
  27  14   1 77.3380 15.5911   1
 -41  27   1 77.2369 10.8762   2
 -27 -11  -1 10.7267 6.14858   3
 -27 -11  -1 9.33307 6.59879   2
  11 -38   1 7.26823 5.10541   1
  11 -38   1 0.31760 2.85501   2
  27  11   1 2.84780 4.68296   1
 -38  27   1 16.5456 5.53278   2
  11 -38   1 12.8931 4.15181   2
  11 -38   1 6.92969 4.53277   3
 -27  -8  -1 196.079 22.0949   2
  -8  35  -1 196.266 18.8993   1
 -27  -8  -1 216.885 20.2414   3
  27   8   1 231.430 25.2280   1
 -35  27   1 195.846 16.9794   2
   8 -35   1 203.541 17.9617   2
   8 -35   1 196.756 20.7535   3
   8 -35   1 218.527 21.6868   1
  -5  32  -1 115.081 12.0352   1
  32 -27  -1 109.460 10.8047   2
 -27  -5  -1 103.291 12.8391   3
  32 -27  -1 147.154 15.0243   1
 -27  -5  -1 133.509 16.7091   2
   5 -32   1 128.431 13.6164   2
  27   5   1 158.301 19.2142   1
 -32  27   1 133.265 11.7066   2
   5 -32   1 114.377 15.3398   1
   5 -32   1 141.798 16.1289   3
 -27  -2  -1 578.674 41.1203   3
 -27  -2  -1 640.101 45.5347   2
  29 -27  -1 554.616 42.1967   1
  29 -27  -1 559.073 38.3673   2
  -2  29  -1 579.503 41.5285   1
   2 -29   1 600.299 46.5330   1
 -29  27   1 597.784 40.7459   2
  27   2   1 617.677 49.6088   1
   2 -29   1 634.875 44.1208   2
   2 -29   1 612.245 45.9437   3
  26 -27  -1 199.399 14.2214   3
  26 -27  -1 199.627 18.0249   1
 -27   1  -1 182.161 16.0734   3
   1  26  -1 235.942 19.0871   1
  26 -27  -1 180.895 13.6631   3
  26 -27  -1 177.852 13.8435   2
 -27   1  -1 207.164 20.0728   2
  27  -1   1 208.976 22.7525   1
  -1 -26   1 206.403 18.6965   2
 -26  27   1 190.771 14.0037   2
  -1 -26   1 207.014 20.4701   3
  -1 -26   1 184.706 19.9288   1
  23 -27  -1 280.692 19.0466   2
 -27   4  -1 327.420 26.0361   2
  23 -27  -1 312.416 21.3178   3
  23 -27  -1 279.446 23.3633   1
 -27   4  -1 275.486 21.3569   3
   4  23  -1 272.960 24.7099   1
  23 -27  -1 310.856 21.1022   3
  27  -4   1 244.387 19.0706   3
  -4 -23   1 247.646 21.9516   2
  -4 -23   1 265.909 23.4804   3
  -4 -23   1 240.147 23.7027   1
  20 -27  -1 79.6110 9.53350   1
 -27   7  -1 78.5243 7.52022   3
  20 -27  -1 82.5072 8.51728   3
 -27   7  -1 78.8182 10.6168   2
  -7 -20   1 66.9932 10.5096   2
 -20  27   1 78.2790 8.91547   3
  -7 -20   1 77.6451 11.3497   3
  -7 -20   1 75.2498 11.5626   1
  27  -7   1 69.7666 7.22383   3
 -27  10  -1 82.2046 6.84408   3
  17 -27  -1 100.873 9.66192   3
  10  17  -1 97.9887 12.3839   1
 -27  10  -1 75.0557 10.2229   2
  17 -27  -1 84.9471 10.0225   1
  27 -10   1 75.6466 6.53363   3
 -10 -17   1 79.9730 10.9533   3
 -10 -17   1 77.6446 11.4402   1
 -17  27   1 87.8553 9.60020   3
 -10 -17   1 63.9488 10.3452   2
  14 -27  -1 600.990 43.4413   3
  14 -27  -1 610.577 39.8562   2
  14 -27  -1 610.580 44.3691   1
 -27  13  -1 633.487 44.2549   2
  13  14  -1 718.284 48.4198   1
  14 -27  -1 644.717 39.8855   2
 -14  27   1 623.628 45.2606   3
 -13 -14   1 616.667 46.3566   3
 -13 -14   1 713.296 47.9912   2
 -27  16  -1 476.872 35.4418   2
  16  11  -1 481.781 39.5471   1
  11 -27  -1 484.258 36.7425   1
  11 -27  -1 499.634 32.8554   2
  11 -27  -1 517.642 33.1492   2
  11 -27  -1 542.995 36.7555   3
  27 -16   1 427.936 34.3805   2
 -16 -11   1 487.053 36.3370   3
 -11  27   1 538.189 34.1365   1
 -16 -11   1 488.905 37.5985   2
  19   8  -1 137.917 18.7824   1
   8 -27  -1 110.230 13.1076   1
 -27  19  -1 123.000 11.6629   2
   8 -27  -1 112.027 12.8708   3
   8 -27  -1 143.794 11.3868   2
  -8  27   1 111.103 11.3480   1
 -19  -8   1 112.816 14.3080   2
 -19  -8   1 139.691 13.6853   3
  -8  27   1 116.426 10.4389   2
  27 -19   1 133.668 11.9918   2
   5 -27  -1 226.218 20.2405   3
   5 -27  -1 228.119 17.7876   2
 -27  22  -1 215.416 17.2565   2
  22   5  -1 254.894 23.8594   1
   5 -27  -1 198.679 19.9589   1
 -22  -5   1 243.817 19.9678   3
 -22  -5   1 222.976 21.7145   2
  27 -22   1 229.104 18.0900   2
  -5  27   1 227.066 18.0916   2
  -5  27   1 225.439 19.2025   1
   2 -27  -1 3.03143 3.76756   3
   2 -27  -1 2.41261 2.81423   2
   2 -27  -1 2.69971 4.05486   1
  25   2  -1 4.66770 5.90540   1
 -27  25  -1 2.51359 2.16734   2
  27 -25   1 0.05376 1.85846   2
 -25  -2   1 -0.9224 3.62053   2
  27 -25   1 5.58395 1.50359   3
  -2  27   1 1.91956 2.65514   2
 -25  -2   1 3.77201 3.22223   3
  -2  27   1 2.47942 2.66918   1
  28  -1  -1 52.7789 7.59155   3
  28  -1  -1 37.9397 10.1703   1
 -27  28  -1 53.2626 8.07362   2
  -1 -27  -1 35.6999 10.9799   1
  -1 -27  -1 55.0084 8.34815   2
  27 -28   1 52.8916 5.69986   3
  27 -28   1 53.8855 8.25466   1
   1  27   1 55.0461 10.2410   1
 -28   1   1 55.2864 7.65496   3
 -28   1   1 54.2018 17.9081   2
  27 -28   1 53.6429 5.83381   3
  27 -28   1 48.1233 5.95561   2
  -4 -27  -1 133.424 18.0325   1
  -4 -27  -1 169.585 18.2948   3
  -4 -27  -1 167.603 16.4810   2
  27 -31   1 156.964 13.4766   3
  27 -31   1 166.747 15.8242   1
  27 -31   1 158.758 12.3045   2
 -31   4   1 151.530 14.1250   3
 -31   4   1 197.708 19.5724   2
 -31   4   1 175.212 14.4180   3
  27 -31   1 159.000 13.2300   3
   4  27   1 139.306 16.7753   1
  -7 -27  -1 302.943 27.4767   2
  -7 -27  -1 329.221 31.4794   1
  -7 -27  -1 341.807 29.7659   3
  27 -34   1 318.500 21.0499   2
 -34   7   1 288.557 22.5817   3
  27 -34   1 297.753 24.7053   3
 -34   7   1 302.581 22.5618   3
  27 -34   1 305.563 20.8815   2
  27 -34   1 312.828 25.8383   1
  27 -34   1 356.635 24.1303   3
 -34   7   1 338.258 28.9785   2
 -10 -27  -1 2.65348 6.11546   3
 -10 -27  -1 1.76418 4.42478   2
 -10 -27  -1 5.79734 6.46085   1
  10  27   1 -2.8189 3.91583   1
  27 -37   1 18.8148 5.84186   3
  27 -37   1 13.8854 5.69850   1
 -13 -27  -1 51.1985 12.2022   2
 -13 -27  -1 41.8279 12.2021   3
 -40  13   1 44.5347 11.6459   2
  13  27   1 51.2568 13.4997   1
  27 -40   1 66.8702 9.36736   3
  27 -40   1 54.2950 10.0904   1
 -16 -27  -1 32.9390 11.4803   2
 -16 -27  -1 35.0586 12.3531   3
 -43  16   1 18.5097 8.50666   2
  16  27   1 32.4790 11.0853   1
  27 -43   1 43.0927 10.3748   1
  27 -43   1 36.6517 12.9569   3
 -19 -27  -1 112.464 17.4232   2
 -19 -27  -1 80.5644 16.0614   3
  27 -46   1 80.6888 13.6117   1
 -46  19   1 93.8306 14.7938   2
  19  27   1 72.4690 17.9629   1
  27 -46   1 78.2290 12.1537   3
 -22 -27  -1 17.7355 9.18331   3
 -22 -27  -1 14.2707 9.35460   2
  27 -49   1 11.7246 6.83787   1
 -49  22   1 20.6088 8.33917   2
  22  27   1 6.79593 7.91115   1
  27 -49   1 12.4713 6.28797   3
 -25 -27  -1 12.0196 8.56904   2
 -25 -27  -1 -0.8858 5.25610   3
 -52  25   1 6.28382 6.35385   2
  27 -52   1 12.7889 7.30157   3
 -28 -27  -1 17.1720 10.7567   2
 -28 -27  -1 3.54767 6.79703   3
  27 -55   1 12.8618 7.40984   3
 -55  28   1 3.38570 5.57652   2
 -28 -24  -1 6.84551 8.22589   2
 -28 -24  -1 -1.1308 5.17011   3
 -52  28   1 -1.8824 3.95822   2
  24 -52   1 1.46295 4.47335   3
 -28 -21  -1 37.9874 13.0840   2
 -28 -21  -1 36.9481 12.3944   3
  21 -49   1 30.3676 10.2411   1
  28  21   1 33.8795 12.1537   1
 -49  28   1 53.7421 11.9388   2
  21 -49   1 39.0669 11.2963   3
 -28 -18  -1 64.2841 16.2802   2
 -28 -18  -1 53.4085 13.6340   3
  28  18   1 47.1623 14.1743   1
  18 -46   1 37.9522 10.8845   3
 -46  28   1 46.5807 10.1536   2
  18 -46   1 48.8894 12.3700   1
 -28 -15  -1 8.61675 7.87404   2
 -28 -15  -1 4.43821 5.89660   3
 -43  28   1 6.10338 4.59139   2
  15 -43   1 -0.1154 4.42553   1
  28  15   1 -0.5447 3.74736   1
  15 -43   1 3.13785 2.60495   2
  15 -43   1 13.7825 7.15061   3
 -28 -12  -1 186.865 20.2613   3
 -28 -12  -1 185.676 22.2322   2
  12 -40   1 181.803 15.5108   2
  12 -40   1 191.049 20.4142   1
 -40  28   1 184.555 16.9323   2
  28  12   1 166.219 22.6014   1
  12 -40   1 164.755 19.2366   3
  12 -40   1 171.673 15.4097   2
  37 -28  -1 14.0072 4.65896   2
 -28  -9  -1 10.5170 6.01971   2
 -28  -9  -1 22.9490 7.35208   3
   9 -37   1 10.0965 4.90404   2
   9 -37   1 3.61636 3.59477   2
 -37  28   1 11.4555 4.35917   2
   9 -37   1 0.86909 3.52682   1
  28   9   1 12.3333 7.80985   1
   9 -37   1 12.3404 6.49508   3
  34 -28  -1 66.1399 10.9240   1
 -28  -6  -1 76.5318 10.7760   3
 -28  -6  -1 43.3262 11.0799   2
  -6  34  -1 71.5087 8.91476   1
  28   6   1 73.9855 13.7739   1
 -34  28   1 74.5483 8.27455   2
   6 -34   1 80.7425 12.3730   1
   6 -34   1 60.1219 9.35073   2
   6 -34   1 89.4554 12.8366   3
  -3  31  -1 94.3307 10.9021   1
 -28  -3  -1 75.4436 10.4313   3
  31 -28  -1 92.7482 11.9808   1
  31 -28  -1 86.3668 8.61434   2
 -28  -3  -1 101.158 14.3002   2
   3 -31   1 93.5538 11.2879   2
 -31  28   1 94.0209 8.58782   2
  28   3   1 76.3589 14.4755   1
   3 -31   1 103.075 13.8819   1
   3 -31   1 77.9889 12.4823   3
 -28   0  -1 1.68482 4.12834   2
   0  28  -1 2.38467 3.58594   1
  28 -28  -1 1.00866 1.43527   2
  28 -28  -1 1.69779 1.25682   3
  28 -28  -1 -2.4523 1.91705   1
 -28   0  -1 0.57450 2.33846   3
   0 -28   1 0.85649 3.30383   1
 -28  28   1 2.07898 1.60292   2
  28   0   1 2.58576 2.82321   3
   0 -28   1 -3.7392 2.61182   2
  28   0   1 5.69067 5.05559   1
   0 -28   1 0.19800 3.51651   3
  25 -28  -1 124.586 10.0078   3
 -28   3  -1 110.463 10.8277   3
 -28   3  -1 95.9230 13.5441   2
  25 -28  -1 98.8453 8.21750   2
  25 -28  -1 118.795 11.1921   3
   3  25  -1 136.991 14.1074   1
  25 -28  -1 106.896 12.2455   1
  -3 -25   1 133.174 19.3030   3
  -3 -25   1 134.139 16.0456   1
  -3 -25   1 113.485 13.3685   2
 -25  28   1 114.533 8.73532   2
  28  -3   1 143.858 17.9301   1
  22 -28  -1 22.8511 5.82645   1
 -28   6  -1 21.0426 3.97852   3
  22 -28  -1 26.2929 4.52244   3
 -28   6  -1 8.41509 4.97798   2
  22 -28  -1 23.2541 4.37032   3
   6  22  -1 17.0709 6.24453   1
  -6 -22   1 15.6942 5.85314   1
  28  -6   1 25.7618 4.36666   3
  -6 -22   1 24.7099 7.53559   3
  -6 -22   1 27.4847 7.10643   2
   9  19  -1 17.2735 6.72697   1
  19 -28  -1 17.7647 5.29018   1
 -28   9  -1 17.1533 6.29531   2
 -28   9  -1 26.0558 3.57976   3
  19 -28  -1 40.4841 5.86839   3
  -9 -19   1 12.9620 5.20992   1
  -9 -19   1 18.3921 6.57908   3
  -9 -19   1 15.5353 5.84196   2
  28  -9   1 18.9905 3.74892   3
 -19  28   1 47.9484 6.76294   3
 -28  12  -1 13.6687 1.72674   3
  16 -28  -1 20.6857 5.20007   3
  12  16  -1 24.8013 8.35836   1
 -28  12  -1 13.8798 1.73806   3
  16 -28  -1 10.4261 4.12806   1
 -28  12  -1 13.1010 4.91604   2
  16 -28  -1 12.5790 1.59914   2
  16 -28  -1 14.4424 1.68834   2
 -12 -16   1 10.3562 4.77403   3
 -12 -16   1 17.0661 5.74164   2
  13 -28  -1 16.5228 5.07568   3
  13 -28  -1 24.2257 6.41213   1
  15  13  -1 3.89660 4.07529   1
  13 -28  -1 15.1151 2.52516   2
  13 -28  -1 15.6144 2.64463   2
 -28  15  -1 24.5104 6.04211   2
 -15 -13   1 24.2102 7.03081   3
 -15 -13   1 14.2548 6.08245   2
 -13  28   1 16.2303 4.41305   1
  10 -28  -1 35.5105 7.90773   3
  10 -28  -1 40.5990 8.83746   1
  10 -28  -1 37.2917 4.65257   2
 -28  18  -1 32.9756 6.83237   2
  18  10  -1 43.0596 11.0202   1
  10 -28  -1 35.0521 4.65692   2
  28 -18   1 29.0614 6.06740   2
 -18 -10   1 34.2015 8.49142   2
 -18 -10   1 32.5317 7.61680   3
 -10  28   1 27.0857 5.01209   1
   7 -28  -1 140.689 15.1772   1
   7 -28  -1 136.179 12.2849   2
 -28  21  -1 148.312 12.9934   2
   7 -28  -1 155.537 15.2601   3
  21   7  -1 143.554 17.4234   1
  -7  28   1 150.307 12.7188   2
 -21  -7   1 171.339 17.4441   2
  28 -21   1 145.392 13.3791   2
  -7  28   1 143.641 13.7596   1
 -21  -7   1 150.484 15.2246   3
   4 -28  -1 33.1790 6.00794   2
 -28  24  -1 42.4154 5.75079   2
   4 -28  -1 36.6667 8.60564   1
   4 -28  -1 49.0679 8.97916   3
  24   4  -1 90.7794 17.2054   1
  28 -24   1 37.8182 5.67940   2
  -4  28   1 46.9243 7.63577   1
 -24  -4   1 42.8109 10.4788   2
  -4  28   1 37.9695 6.19692   2
 -24  -4   1 27.9794 7.16464   3
   1 -28  -1 34.8643 8.60138   3
   1 -28  -1 34.1625 9.41983   1
  27   1  -1 46.3305 12.1174   3
   1 -28  -1 40.4796 8.06868   2
  27   1  -1 26.6452 8.60203   1
 -28  27  -1 49.8124 5.78515   2
 -27  -1   1 42.3207 10.7326   2
 -27  -1   1 58.6183 8.26735   3
  28 -27   1 60.7617 8.62353   1
  28 -27   1 50.5372 4.77980   3
  28 -27   1 53.4050 4.90772   3
  -1  28   1 49.6315 8.79013   1
  -1  28   1 39.1329 9.49619   2
  28 -27   1 50.8535 6.48271   2
  -2 -28  -1 12.4632 5.69472   3
  30  -2  -1 25.2056 10.2424   1
  -2 -28  -1 24.2442 8.13206   1
  -2 -28  -1 12.8302 5.00587   2
 -28  30  -1 12.2137 3.05986   2
  28 -30   1 21.6556 3.94683   3
   2  28   1 12.7694 5.91831   1
  28 -30   1 17.5070 5.58365   1
  28 -30   1 12.4825 3.26274   2
 -30   2   1 18.1233 6.74121   2
  28 -30   1 14.7383 3.39936   3
 -30   2   1 17.2961 4.75426   3
 -30   2   1 7.93321 3.62056   3
  -5 -28  -1 79.4486 12.1454   3
  -5 -28  -1 30.7735 10.2184   1
  -5 -28  -1 46.9035 9.03056   2
  28 -33   1 50.8433 5.14787   2
  28 -33   1 47.6630 5.20658   2
  28 -33   1 40.3339 6.16766   3
   5  28   1 50.8206 11.8075   1
  28 -33   1 42.2355 8.14250   1
  28 -33   1 51.1405 6.74972   3
 -33   5   1 55.3850 12.0441   2
 -33   5   1 38.2174 6.50650   3
 -33   5   1 58.2813 7.27066   3
  -8 -28  -1 89.5636 13.0503   2
  -8 -28  -1 99.9335 14.7526   3
  -8 -28  -1 70.9770 14.3608   1
  28 -36   1 120.697 11.1224   3
 -36   8   1 92.6115 9.13054   3
 -36   8   1 111.608 14.8471   2
  28 -36   1 88.4194 6.96758   2
 -36   8   1 91.9129 9.35292   3
 -11 -28  -1 34.0222 12.3925   1
 -11 -28  -1 27.4811 9.62080   2
 -11 -28  -1 32.7181 11.1967   3
 -39  11   1 36.0701 4.05042   3
  28 -39   1 28.7841 7.02714   3
 -39  11   1 29.9446 4.08605   3
  11  28   1 35.2109 10.1545   1
  28 -39   1 42.4674 9.53682   1
 -39  11   1 24.1658 7.89788   2
 -14 -28  -1 4.74175 6.27199   2
 -14 -28  -1 8.59987 6.99926   3
  28 -42   1 24.2347 7.49870   1
  28 -42   1 30.1298 7.29060   3
 -42  14   1 13.8266 6.54941   2
  14  28   1 3.99143 6.19367   1
 -17 -28  -1 156.247 21.5851   3
 -17 -28  -1 176.668 21.6279   2
  28 -45   1 193.749 21.1840   1
  28 -45   1 185.647 19.0109   3
  17  28   1 180.030 24.0824   1
 -45  17   1 218.401 22.9232   2
 -20 -28  -1 7.31162 7.45180   3
 -20 -28  -1 22.1999 8.96062   2
  28 -48   1 14.0429 6.21962   3
  28 -48   1 10.8913 6.68567   1
  20  28   1 12.4362 9.10344   1
 -48  20   1 8.85293 7.01281   2
 -23 -28  -1 31.3099 12.4891   2
 -23 -28  -1 28.9866 11.7750   3
  28 -51   1 18.7639 8.65773   1
  28 -51   1 38.5092 10.2585   3
 -51  23   1 15.2734 8.68416   2
 -26 -28  -1 30.1838 11.8362   3
 -26 -28  -1 75.4698 19.2632   2
  28 -54   1 67.2778 12.8084   3
 -54  26   1 69.1002 15.3681   2
 -29 -28  -1 6.05759 8.52605   2
 -29 -28  -1 15.3535 10.2691   3
 -57  29   1 15.4406 8.41300   2
  28 -57   1 12.1705 7.32550   3
 -29 -25  -1 83.8947 19.8134   3
 -29 -25  -1 119.311 20.1563   2
  25 -54   1 108.419 17.0291   3
 -54  29   1 122.971 17.1143   2
 -29 -22  -1 77.0759 17.9849   2
 -29 -22  -1 76.7733 18.2575   3
 -51  29   1 75.2415 12.8737   2
  29  22   1 67.2917 17.2525   1
  22 -51   1 64.0510 12.9760   3
 -29 -19  -1 127.988 20.1624   2
 -29 -19  -1 117.282 17.7298   3
  29  19   1 133.203 20.9844   1
  19 -48   1 97.4439 15.5998   3
 -48  29   1 101.979 13.9428   2
  19 -48   1 81.6574 15.0485   1
 -29 -16  -1 44.1792 13.3924   2
 -29 -16  -1 39.4866 12.2478   3
  29  16   1 46.4475 14.6338   1
  16 -45   1 33.8128 10.1967   1
 -45  29   1 67.0198 17.3015   2
  16 -45   1 38.5399 5.76416   2
  16 -45   1 46.2949 12.1283   3
 -29 -13  -1 40.3852 11.9594   2
 -29 -13  -1 41.4792 10.6939   3
  13 -42   1 40.3382 6.85675   2
  29  13   1 38.7919 12.5036   1
  13 -42   1 62.0009 13.9483   1
  13 -42   1 36.4314 10.3042   3
 -42  29   1 45.9950 9.32008   2
 -29 -10  -1 82.6844 12.6531   3
  39 -29  -1 74.4653 12.4424   1
 -29 -10  -1 80.5289 14.5073   2
 -39  29   1 62.3553 8.80554   2
  10 -39   1 68.4056 12.2881   1
  29  10   1 91.4653 16.0025   1
  10 -39   1 71.2152 12.3696   3
  10 -39   1 68.5217 9.06547   2
  36 -29  -1 48.3437 9.69836   1
 -29  -7  -1 48.5500 9.51066   3
  36 -29  -1 40.2783 6.67290   2
 -29  -7  -1 57.4539 13.2508   2
  29   7   1 53.2994 13.6986   1
 -36  29   1 50.8098 6.97606   2
   7 -36   1 63.2713 13.3848   3
   7 -36   1 49.4170 11.8213   1
   7 -36   1 47.8566 9.13636   2
  -4  33  -1 30.2753 7.55873   1
 -29  -4  -1 19.5954 8.42938   2
 -29  -4  -1 32.4784 7.85278   3
  33 -29  -1 24.1224 5.07311   2
  33 -29  -1 37.1362 8.83248   1
   4 -33   1 28.2023 8.51215   3
  29   4   1 37.1318 11.2666   1
   4 -33   1 25.1103 8.07450   1
   4 -33   1 20.0786 6.32600   2
 -33  29   1 26.0255 4.49592   2
  -1  30  -1 17.1795 6.14297   1
  30 -29  -1 17.6576 5.91645   1
 -29  -1  -1 17.1789 7.50874   2
  30 -29  -1 13.4392 3.35395   2
 -29  -1  -1 19.3324 5.54989   3
  29   1   1 14.9204 6.95240   1
   1 -30   1 15.9083 6.40823   2
 -30  29   1 16.9977 3.50001   2
   1 -30   1 14.0776 6.28853   1
   1 -30   1 33.9370 8.87454   3
 -29   2  -1 609.555 44.3562   2
 -29   2  -1 565.458 39.4624   3
  27 -29  -1 588.647 37.6765   3
  27 -29  -1 544.054 36.5169   2
   2  27  -1 575.156 42.3325   1
  27 -29  -1 583.539 41.7844   1
  27 -29  -1 547.171 37.0367   3
  -2 -27   1 586.778 42.3057   2
  29  -2   1 536.141 42.4067   3
 -27  29   1 558.250 36.4100   2
  29  -2   1 562.157 46.8739   1
  -2 -27   1 606.885 44.1288   3
  -2 -27   1 584.115 45.1757   1
 -29   5  -1 68.9226 7.50683   3
 -29   5  -1 70.4734 10.8110   2
  24 -29  -1 58.8178 4.52282   2
   5  24  -1 48.7138 9.23760   1
  24 -29  -1 64.7727 7.32818   3
  24 -29  -1 85.7301 9.94417   1
  24 -29  -1 86.2719 7.77251   3
  24 -29  -1 63.4071 4.58409   2
  29  -5   1 58.5429 7.01765   3
  -5 -24   1 41.7928 12.0863   3
  -5 -24   1 44.8719 10.5140   1
  -5 -24   1 61.9267 9.90984   2
 -29   8  -1 162.595 13.2531   3
 -29   8  -1 178.857 17.6778   2
  21 -29  -1 188.537 16.5459   1
  21 -29  -1 183.615 14.9700   3
  -8 -21   1 167.153 17.0432   2
  -8 -21   1 159.491 17.2618   3
  29  -8   1 153.431 12.6754   3
  -8 -21   1 150.449 17.7829   1
 -21  29   1 182.448 17.3924   3
  18 -29  -1 93.4416 11.0733   1
 -29  11  -1 99.8792 7.55145   3
 -29  11  -1 105.178 12.1331   2
 -29  11  -1 95.0663 7.43158   3
  11  18  -1 114.947 14.0239   1
  18 -29  -1 93.1958 10.2564   3
 -11 -18   1 89.7977 12.9232   1
 -11 -18   1 83.6813 11.9631   3
 -11 -18   1 100.854 12.8923   2
  14  15  -1 74.5494 11.9231   1
  15 -29  -1 77.6276 6.07452   2
 -29  14  -1 66.9260 9.43059   2
  15 -29  -1 75.3082 7.31892   2
  15 -29  -1 85.1713 10.3375   1
  15 -29  -1 101.477 10.2521   3
 -14 -15   1 80.7435 11.1291   3
 -14 -15   1 72.4705 11.1341   2
  12 -29  -1 19.1776 5.93852   1
  12 -29  -1 14.6434 2.73369   2
 -29  17  -1 20.7261 5.61853   2
  12 -29  -1 15.6450 3.14788   2
  12 -29  -1 14.6745 5.16888   3
  17  12  -1 10.0728 5.25761   1
 -17 -12   1 8.75702 5.23535   2
  29 -17   1 22.3076 8.40919   2
 -12  29   1 22.6328 5.03586   1
 -17 -12   1 14.6189 5.93856   3
   9 -29  -1 262.153 20.9502   3
   9 -29  -1 210.251 16.9526   2
  20   9  -1 210.535 22.8862   1
   9 -29  -1 246.944 21.0862   1
 -29  20  -1 217.611 18.4081   2
  -9  29   1 241.586 18.2501   1
  29 -20   1 189.472 17.7714   2
  -9  29   1 241.296 17.0265   2
 -20  -9   1 221.572 20.1446   3
 -20  -9   1 189.740 20.6998   2
   6 -29  -1 61.3608 9.49439   3
   6 -29  -1 53.5991 6.94442   2
  23   6  -1 57.9817 11.5966   1
   6 -29  -1 48.3631 9.01747   1
 -29  23  -1 50.4945 6.81249   2
  -6  29   1 39.9014 6.16401   2
 -23  -6   1 85.9073 16.0456   2
  29 -23   1 42.7461 6.71420   2
 -23  -6   1 57.5539 8.87203   3
  -6  29   1 60.0040 8.06553   1
   3 -29  -1 299.243 27.2547   1
 -29  26  -1 284.705 22.0600   2
   3 -29  -1 313.469 23.9215   2
  26   3  -1 344.463 30.7307   1
   3 -29  -1 309.772 31.0165   3
  29 -26   1 322.540 23.8232   2
  -3  29   1 339.958 27.1499   2
 -26  -3   1 322.193 25.7286   3
  -3  29   1 326.634 26.4437   1
 -26  -3   1 308.431 28.6385   2
   0 -29  -1 1.19002 3.92248   3
   0 -29  -1 -2.2007 2.04088   2
  29   0  -1 1.20455 4.49079   1
   0 -29  -1 -1.1864 2.49371   1
 -29  29  -1 -1.1112 1.30041   2
  29 -29   1 1.90985 1.93474   2
  29 -29   1 5.01123 3.51381   1
   0  29   1 -2.5032 1.95115   1
 -29   0   1 4.85827 3.37453   3
  29 -29   1 -1.4093 1.19118   3
  29 -29   1 -0.8547 1.22135   3
 -29   0   1 0.07404 3.47359   2
  32  -3  -1 9.26141 7.26240   1
  -3 -29  -1 16.4888 7.50636   1
  -3 -29  -1 12.3318 5.27408   2
  -3 -29  -1 3.20084 4.05685   3
 -29  32  -1 13.5784 3.21049   2
   3  29   1 9.37297 4.84574   1
  29 -32   1 9.24377 3.36569   3
 -32   3   1 10.0942 3.72024   3
  29 -32   1 3.91361 2.15245   2
 -32   3   1 4.79208 3.06972   3
  29 -32   1 9.00904 3.09170   3
 -32   3   1 16.6262 7.22713   2
  29 -32   1 9.81430 5.06124   1
  -6 -29  -1 266.380 27.5606   1
  -6 -29  -1 236.481 24.3991   3
  29 -35   1 236.806 19.3018   3
  29 -35   1 258.695 17.3063   2
 -35   6   1 266.480 25.2943   2
   6  29   1 287.399 26.0857   1
 -35   6   1 231.810 19.1480   3
  29 -35   1 253.030 22.4186   1
  29 -35   1 257.392 17.3554   2
  -9 -29  -1 55.1141 14.7587   1
  -9 -29  -1 75.0680 12.1620   2
  -9 -29  -1 74.0639 13.7070   3
  29 -38   1 72.0668 8.86975   3
  29 -38   1 44.2351 9.26553   1
 -38   9   1 69.3768 7.13592   3
 -38   9   1 65.1125 7.05016   3
 -38   9   1 80.9153 13.1001   2
 -12 -29  -1 12.1285 7.14365   2
 -12 -29  -1 49.2792 13.8639   3
 -41  12   1 34.5005 11.0089   2
  29 -41   1 34.7112 7.62036   3
  12  29   1 45.3747 11.4828   1
  29 -41   1 23.7997 7.87191   1
 -15 -29  -1 13.5095 7.90256   3
 -15 -29  -1 3.82160 6.07792   2
 -44  15   1 19.6833 8.32850   2
  15  29   1 4.83018 7.01120   1
  29 -44   1 9.87710 5.03368   3
  29 -44   1 6.15572 5.56287   1
 -18 -29  -1 30.2792 10.3641   2
 -18 -29  -1 28.9390 15.7266   3
 -47  18   1 23.9062 8.94133   2
  18  29   1 28.7371 11.4040   1
  29 -47   1 24.1796 7.42233   3
  29 -47   1 19.4227 8.74365   1
 -21 -29  -1 81.7063 18.5179   2
 -21 -29  -1 75.5461 17.5035   3
  29 -50   1 72.7107 12.3002   3
  29 -50   1 68.8976 15.1938   1
 -50  21   1 62.2141 14.3450   2
 -24 -29  -1 -0.0974 5.93869   2
 -24 -29  -1 -2.5948 4.79837   3
 -53  24   1 10.4311 6.76781   2
  29 -53   1 -0.1994 4.47305   3
 -27 -29  -1 25.3172 12.2870   2
 -27 -29  -1 33.7971 13.0622   3
  29 -56   1 45.4886 12.0378   3
 -56  27   1 42.6756 12.0259   2
 -30 -29  -1 6.27889 11.8382   2
 -30 -26  -1 20.1436 11.6042   2
 -30 -26  -1 31.8959 13.0877   3
  26 -56   1 31.3876 11.1067   3
 -56  30   1 45.0992 12.1409   2
 -30 -23  -1 15.3549 10.0196   2
 -30 -23  -1 11.6993 9.20880   3
 -53  30   1 1.64002 5.24055   2
  23 -53   1 14.0662 8.11327   3
 -30 -20  -1 25.6291 11.5117   2
 -30 -20  -1 30.8766 13.3387   3
  30  20   1 31.6209 13.7793   1
  20 -50   1 40.4571 11.5902   3
 -50  30   1 24.3105 8.14716   2
 -30 -17  -1 47.5191 12.6878   3
 -30 -17  -1 43.3195 13.5943   2
  17 -47   1 36.4726 10.6896   3
  17 -47   1 38.0260 5.49115   2
 -47  30   1 52.1674 9.72910   2
  17 -47   1 52.8533 16.9406   1
  30  17   1 43.0683 14.2993   1
 -30 -14  -1 90.7477 15.2396   3
 -30 -14  -1 107.988 17.8894   2
  14 -44   1 73.9979 14.1999   1
  30  14   1 92.9395 17.9328   1
  14 -44   1 82.2037 14.1787   3
  14 -44   1 82.5342 9.28968   2
 -44  30   1 85.5582 11.5134   2
 -30 -11  -1 16.8138 7.80755   2
  41 -30  -1 17.4871 7.24684   1
 -30 -11  -1 10.3230 6.51405   3
  11 -41   1 15.8838 6.82705   3
 -41  30   1 25.0304 6.36689   2
  11 -41   1 11.3632 6.94576   1
  11 -41   1 15.0779 5.20470   2
  30  11   1 17.4779 9.77265   1
 -30  -8  -1 19.0701 6.42204   3
  38 -30  -1 6.28832 3.36367   2
 -30  -8  -1 26.6601 9.60483   2
  38 -30  -1 2.10256 3.89402   1
  30   8   1 6.97635 6.37397   1
   8 -38   1 4.74097 3.98951   2
 -38  30   1 14.2279 4.59130   2
   8 -38   1 12.8237 6.32781   1
   8 -38   1 1.97392 4.67682   3
  35 -30  -1 192.624 19.5065   1
  -5  35  -1 159.782 16.2513   1
 -30  -5  -1 197.784 18.5275   3
  35 -30  -1 183.378 17.8442   2
 -30  -5  -1 211.132 22.4219   2
   5 -35   1 199.658 21.0822   1
   5 -35   1 184.722 17.3299   2
   5 -35   1 169.944 19.6453   3
 -35  30   1 171.207 14.5829   2
  30   5   1 197.691 23.8606   1
  -2  32  -1 21.0351 6.41567   1
  32 -30  -1 22.2834 6.83795   1
  32 -30  -1 23.5564 4.54531   2
 -30  -2  -1 18.9331 5.73083   3
 -30  -2  -1 8.53803 5.99477   2
   2 -32   1 18.0049 6.08057   2
  30   2   1 35.7937 11.9238   1
   2 -32   1 13.3394 6.26780   3
   2 -32   1 20.2702 7.89971   1
  29 -30  -1 18.0518 3.14800   2
  29 -30  -1 26.2372 3.70591   3
 -30   1  -1 15.7862 6.57958   2
   1  29  -1 23.1581 6.86500   1
 -30   1  -1 17.8888 5.12678   3
  29 -30  -1 21.2506 3.12064   3
  29 -30  -1 18.0306 5.75228   1
  -1 -29   1 3.81825 3.89677   1
  -1 -29   1 19.7911 6.86081   3
  30  -1   1 18.4688 8.24050   1
 -29  30   1 23.4504 3.19131   2
  -1 -29   1 14.5716 5.70010   2
 -30   4  -1 93.8348 13.1807   2
  26 -30  -1 92.8219 6.53693   2
  26 -30  -1 92.2437 8.84414   3
  26 -30  -1 85.8009 8.30103   3
  26 -30  -1 81.1540 6.27175   2
   4  26  -1 70.4960 11.5797   1
 -30   4  -1 84.7756 9.21014   3
  26 -30  -1 93.2046 11.1591   1
  -4 -26   1 87.4644 13.1183   3
  -4 -26   1 96.3846 12.5108   2
  30  -4   1 84.3866 15.4657   1
  -4 -26   1 86.7182 24.5554   1
  23 -30  -1 23.2379 4.65554   3
 -30   7  -1 24.5406 4.29880   3
  23 -30  -1 17.3202 5.73159   1
   7  23  -1 13.1257 6.12835   1
 -30   7  -1 26.1480 8.14182   2
  23 -30  -1 18.6698 4.65893   3
  30  -7   1 11.8614 3.49386   3
  -7 -23   1 22.5918 7.64584   2
  -7 -23   1 18.8249 7.52939   1
  -7 -23   1 11.0215 5.03281   3
  10  20  -1 90.1949 13.2533   1
 -30  10  -1 88.1541 12.0112   2
 -30  10  -1 98.6275 8.09163   3
  20 -30  -1 122.517 11.0350   3
 -30  10  -1 90.6226 7.95191   3
  20 -30  -1 104.417 11.6447   1
 -10 -20   1 79.4894 11.6352   2
 -20  30   1 123.525 11.5902   3
 -10 -20   1 81.3463 11.7784   3
 -10 -20   1 51.5254 10.7494   1
 -30  13  -1 89.9006 11.5939   2
  17 -30  -1 106.489 12.0645   1
  13  17  -1 112.378 14.6626   1
  17 -30  -1 113.181 11.5211   3
 -13 -17   1 92.6055 12.9774   2
 -13 -17   1 114.065 13.6176   3
  14 -30  -1 96.8935 10.9045   3
  14 -30  -1 96.2225 7.15123   2
  14 -30  -1 87.2368 7.07141   2
  14 -30  -1 77.2225 10.6732   1
  16  14  -1 74.9379 12.8285   1
 -30  16  -1 73.0654 9.90528   2
 -16 -14   1 80.5370 12.2038   2
 -16 -14   1 99.8492 12.4611   3
  19  11  -1 203.656 22.8185   1
  11 -30  -1 230.710 16.6969   2
  11 -30  -1 234.541 20.2436   3
  11 -30  -1 230.258 16.5457   2
 -30  19  -1 205.070 18.5146   2
  11 -30  -1 247.362 21.0926   1
  30 -19   1 220.039 19.5324   2
 -11  30   1 226.883 17.8247   1
 -19 -11   1 218.754 21.9214   2
 -19 -11   1 213.249 20.4376   3
 -30  22  -1 108.165 11.1626   2
  22   8  -1 116.967 16.1077   1
   8 -30  -1 117.352 10.7659   2
   8 -30  -1 118.978 13.9253   1
   8 -30  -1 120.561 13.4832   3
  -8  30   1 128.901 10.9320   2
  30 -22   1 85.5905 10.6008   2
 -22  -8   1 107.683 12.9973   3
 -22  -8   1 92.6506 16.5418   2
  -8  30   1 131.784 12.0378   1
   5 -30  -1 126.000 12.8820   2
   5 -30  -1 164.362 17.1381   1
  25   5  -1 149.368 18.9388   1
 -30  25  -1 144.459 12.6807   2
 -25  -5   1 159.989 18.0916   2
  30 -25   1 142.668 17.3062   2
  -5  30   1 154.572 15.1580   1
 -25  -5   1 152.843 15.4095   3
  28   2  -1 15.2688 7.02730   1
   2 -30  -1 16.6728 7.21786   1
 -30  28  -1 12.7652 3.63442   2
   2 -30  -1 11.8996 4.44767   2
   2 -30  -1 11.1743 5.24510   3
 -28  -2   1 25.8119 8.53650   2
  -2  30   1 13.4145 5.38396   1
 -28  -2   1 15.8590 5.11202   3
  30 -28   1 11.3688 4.91535   1
  30 -28   1 18.3691 4.30206   2
  -1 -30  -1 18.4027 7.47276   3
 -30  31  -1 20.9152 6.11483   2
  31  -1  -1 9.40329 6.94681   1
  -1 -30  -1 14.6117 7.07323   1
  -1 -30  -1 12.5168 4.77554   2
  30 -31   1 17.3909 3.88452   2
  30 -31   1 3.92381 3.37323   1
  30 -31   1 16.8662 3.32639   3
 -31   1   1 28.1098 8.61114   2
   1  30   1 12.2542 5.65011   1
  30 -31   1 18.9388 3.59351   3
 -31   1   1 25.3301 6.37502   3
  -4 -30  -1 32.7895 10.0318   3
  -4 -30  -1 39.1576 9.12947   2
  34  -4  -1 53.7293 15.1608   1
  -4 -30  -1 34.8870 11.0660   1
 -34   4   1 29.7563 6.00541   3
  30 -34   1 34.8177 8.13967   1
 -34   4   1 30.4426 5.81569   3
   4  30   1 26.5488 8.16784   1
  30 -34   1 32.4318 4.40413   2
  30 -34   1 31.6083 4.43934   2
 -34   4   1 32.4942 9.56179   2
  30 -34   1 37.5196 5.34035   3
  30 -34   1 47.1411 6.09256   3
  -7 -30  -1 76.2538 15.0361   1
  -7 -30  -1 90.4583 13.1446   2
  -7 -30  -1 89.0100 14.4904   3
  30 -37   1 73.7193 5.63096   2
  30 -37   1 84.8458 9.19998   3
  30 -37   1 76.7632 6.31295   2
 -37   7   1 85.9669 13.8271   2
  30 -37   1 79.3771 11.4914   1
 -37   7   1 87.7367 8.68177   3
   7  30   1 99.0140 14.2497   1
 -10 -30  -1 28.6625 10.4191   1
 -10 -30  -1 32.0635 9.55969   2
 -10 -30  -1 26.1803 9.89987   3
 -40  10   1 22.8956 4.26118   3
  30 -40   1 22.8339 7.22577   1
 -40  10   1 34.2930 4.56744   3
  30 -40   1 47.7152 7.39368   3
 -40  10   1 14.5170 7.68556   2
 -13 -30  -1 40.7683 11.5324   3
 -13 -30  -1 36.8401 11.2304   2
  30 -43   1 30.5024 7.27838   3
  30 -43   1 7.46405 6.17270   1
 -43  13   1 12.6751 7.88511   2
  13  30   1 26.5655 12.0781   1
 -16 -30  -1 34.6708 13.2677   3
 -16 -30  -1 46.3626 13.3008   2
  30 -46   1 21.2600 7.79747   1
  16  30   1 13.1767 8.29610   1
  30 -46   1 40.9168 9.39773   3
 -46  16   1 33.1032 10.9999   2
 -19 -30  -1 71.5733 17.4938   3
 -19 -30  -1 82.6140 27.7736   2
  30 -49   1 65.5923 11.6663   3
  30 -49   1 90.7273 14.5419   1
 -49  19   1 78.9317 14.3963   2
 -22 -30  -1 59.3318 16.1561   3
 -22 -30  -1 61.3672 16.0433   2
  30 -52   1 63.7100 11.8059   3
 -52  22   1 61.5663 14.8849   2
 -25 -30  -1 16.4596 10.0201   3
 -25 -30  -1 23.4581 11.4460   2
  30 -55   1 21.4747 9.15911   3
 -55  25   1 16.1401 7.89521   2
 -28 -30  -1 20.3882 11.0804   2
 -28 -30  -1 19.9735 11.1614   3
 -58  28   1 16.1155 8.98023   2
  30 -58   1 10.7171 7.35638   3
 -31 -27  -1 2.69716 7.84185   2
 -31 -27  -1 3.71130 7.32875   3
  27 -58   1 7.48842 6.68146   3
 -58  31   1 15.8807 8.18268   2
 -31 -24  -1 55.3637 17.0890   2
 -31 -24  -1 38.0182 14.5381   3
  24 -55   1 33.0489 10.9776   3
 -55  31   1 36.1921 10.5718   2
 -31 -21  -1 120.134 20.0976   2
 -31 -21  -1 88.7440 17.1128   3
  31  21   1 46.5358 14.8752   1
  21 -52   1 77.7763 14.5482   3
 -52  31   1 65.0078 12.1515   2
 -31 -18  -1 70.8189 18.6909   2
 -31 -18  -1 95.3056 16.1837   3
  18 -49   1 83.1215 14.9958   3
  31  18   1 73.3073 18.4855   1
 -49  31   1 79.6452 12.2481   2
  18 -49   1 93.8351 17.4199   1
 -31 -15  -1 91.2703 15.2459   3
 -31 -15  -1 56.2834 18.8606   2
  31  15   1 107.481 19.3162   1
  15 -46   1 70.1203 8.54628   2
  15 -46   1 95.7839 15.0462   3
  15 -46   1 82.5469 14.6452   1
 -46  31   1 76.9176 11.4629   2
 -31 -12  -1 10.0955 6.60248   3
 -31 -12  -1 17.3360 9.45233   2
  43 -31  -1 4.32023 5.17271   1
 -43  31   1 7.24518 4.60046   2
  12 -43   1 12.1198 7.16951   3
  12 -43   1 5.20892 3.94799   2
  31  12   1 12.7700 8.32387   1
  12 -43   1 7.04272 6.69375   1
  40 -31  -1 95.0002 14.8041   1
 -31  -9  -1 131.191 18.6448   2
 -31  -9  -1 126.636 15.7512   3
 -40  31   1 116.328 12.0313   2
   9 -40   1 102.981 15.9289   1
  31   9   1 130.338 20.1085   1
   9 -40   1 117.799 12.8679   2
   9 -40   1 128.701 16.9977   3
  37 -31  -1 134.529 16.0150   1
  37 -31  -1 113.935 11.5818   2
 -31  -6  -1 128.905 17.7401   2
  31   6   1 120.231 19.3058   1
   6 -37   1 145.598 17.4967   3
   6 -37   1 136.624 14.4699   2
 -37  31   1 141.112 12.4253   2
   6 -37   1 132.601 17.6767   1
  34 -31  -1 322.145 27.1341   1
  -3  34  -1 333.446 31.5021   1
  34 -31  -1 272.282 21.6888   2
 -31  -3  -1 314.912 25.4197   3
 -31  -3  -1 309.283 29.3328   2
  31   3   1 357.944 34.2438   1
   3 -34   1 333.161 29.8528   3
 -34  31   1 319.040 22.9933   2
   3 -34   1 314.197 30.1337   1
   3 -34   1 323.139 26.8262   2
  31 -31  -1 0.87994 2.54796   1
 -31   0  -1 0.61320 2.16377   3
 -31   0  -1 3.18030 4.40145   2
  31 -31  -1 0.04289 0.84118   3
  31 -31  -1 0.07878 1.31252   2
   0  31  -1 0.07546 2.70514   1
   0 -31   1 -1.2431 2.07486   1
 -31  31   1 0.52649 1.19606   2
   0 -31   1 -3.9525 2.00192   2
   0 -31   1 -1.4296 3.26292   3
  31   0   1 -2.7207 3.22654   1
  28 -31  -1 79.5717 6.45012   2
  28 -31  -1 80.8757 11.0594   1
 -31   3  -1 96.7141 9.85700   3
  28 -31  -1 91.2207 8.43843   3
 -31   3  -1 89.0782 13.1315   2
   3  28  -1 88.9915 12.0136   1
  -3 -28   1 84.0528 13.5650   1
  31  -3   1 88.4719 15.5651   1
  -3 -28   1 83.0746 13.1224   3
  -3 -28   1 97.5695 12.3224   2
  31  -3   1 93.7865 11.6238   3
  25 -31  -1 138.119 13.9562   1
  25 -31  -1 148.814 11.8656   3
   6  25  -1 98.0698 14.0254   1
 -31   6  -1 110.604 10.9731   3
  25 -31  -1 129.734 11.7031   3
 -31   6  -1 128.657 18.1959   2
  -6 -25   1 104.630 14.8465   3
  -6 -25   1 115.399 15.8656   1
  31  -6   1 118.406 11.1270   3
  -6 -25   1 128.524 14.9784   2
  22 -31  -1 136.421 14.3198   1
  22 -31  -1 139.795 12.9040   3
  22 -31  -1 127.937 12.8442   3
 -31   9  -1 135.298 15.5906   2
 -31   9  -1 145.934 11.1539   3
  -9 -22   1 112.674 15.6090   1
  -9 -22   1 109.355 14.5298   3
  -9 -22   1 127.937 14.8431   2
  12  19  -1 365.714 31.4012   1
 -31  12  -1 363.534 29.1377   2
 -31  12  -1 353.422 23.0480   3
  19 -31  -1 365.420 27.3225   3
  19 -31  -1 359.984 28.5092   1
 -12 -19   1 352.178 30.8728   3
 -12 -19   1 350.154 29.7835   2
  16 -31  -1 124.933 13.4357   1
 -31  15  -1 104.055 12.7159   2
  16 -31  -1 123.767 8.46895   2
  15  16  -1 118.796 15.9053   1
  16 -31  -1 116.777 12.5249   3
 -15 -16   1 113.146 14.2375   3
 -15 -16   1 136.522 15.5261   2
  13 -31  -1 160.760 11.6911   2
 -31  18  -1 181.956 15.5679   2
  18  13  -1 135.950 17.8898   1
  13 -31  -1 142.557 15.0367   3
  13 -31  -1 163.217 16.0223   1
  13 -31  -1 144.375 11.5651   2
 -18 -13   1 152.007 20.4032   2
 -13  31   1 169.111 14.1231   1
 -18 -13   1 164.232 17.3636   3
  10 -31  -1 37.5083 8.72458   3
  10 -31  -1 54.2251 6.16071   2
  10 -31  -1 41.2103 8.29833   1
  10 -31  -1 48.1435 5.81638   2
 -31  21  -1 52.4651 7.58862   2
  21  10  -1 54.7140 12.9939   1
 -21 -10   1 49.0034 10.3321   3
 -21 -10   1 59.2421 10.9987   2
 -10  31   1 56.5781 7.51607   1
   7 -31  -1 18.1829 4.78906   2
  24   7  -1 19.3281 7.50884   1
 -31  24  -1 16.4448 4.78265   2
   7 -31  -1 17.1880 5.94383   1
   7 -31  -1 17.2118 6.74769   3
  -7  31   1 28.6627 6.09787   2
 -24  -7   1 12.9641 7.18855   2
  31 -24   1 14.9218 4.74199   2
 -24  -7   1 20.4948 6.81569   3
  -7  31   1 24.1991 5.96028   1
   4 -31  -1 164.390 14.5917   2
   4 -31  -1 151.202 17.1805   3
  27   4  -1 178.617 21.0833   1
   4 -31  -1 127.466 16.7132   1
 -31  27  -1 147.442 13.0184   2
  31 -27   1 141.841 16.0523   2
 -27  -4   1 188.566 20.1904   2
  -4  31   1 159.370 16.0148   1
 -27  -4   1 170.440 16.6056   3
   1 -31  -1 10.7651 6.26153   1
   1 -31  -1 17.1959 7.08425   3
   1 -31  -1 13.3746 4.93063   2
 -31  30  -1 13.3984 3.75234   2
  30   1  -1 16.4736 7.81067   1
 -30  -1   1 17.5154 5.45846   3
  31 -30   1 17.4167 5.75574   1
  -1  31   1 18.3562 6.58347   1
 -30  -1   1 16.6435 7.13169   2
  31 -30   1 12.2811 1.96847   3
  31 -30   1 13.6607 3.94757   2
  33  -2  -1 134.977 20.3635   1
  -2 -31  -1 119.579 14.8011   2
  -2 -31  -1 174.898 18.7502   3
 -31  33  -1 143.413 11.3546   2
  -2 -31  -1 121.481 17.5481   1
 -33   2   1 129.780 12.8664   3
  31 -33   1 123.993 10.7651   2
   2  31   1 118.192 15.4882   1
  31 -33   1 135.310 10.5988   3
  31 -33   1 131.043 10.7211   3
  31 -33   1 120.543 14.2714   1
 -33   2   1 137.698 17.3646   2
  -5 -31  -1 14.4424 6.24550   2
  -5 -31  -1 5.01085 5.08153   1
  -5 -31  -1 4.40888 5.56042   3
  36  -5  -1 1.11114 5.74407   1
 -36   5   1 10.8127 3.97820   3
   5  31   1 12.7363 6.51316   1
 -36   5   1 0.50600 4.66906   2
 -36   5   1 19.1773 4.80316   3
  31 -36   1 11.0111 2.49429   2
  31 -36   1 9.82618 5.72924   1
  31 -36   1 13.8805 4.15767   3
  31 -36   1 7.14861 2.23008   2
  31 -36   1 14.3030 3.90964   3
  -8 -31  -1 204.768 24.6774   1
  -8 -31  -1 195.847 20.0307   2
  -8 -31  -1 124.194 18.9998   3
 -39   8   1 159.595 19.5862   2
  31 -39   1 152.626 13.9968   3
 -39   8   1 164.118 13.2289   3
   8  31   1 146.813 19.1339   1
 -39   8   1 151.922 12.9078   3
  31 -39   1 148.383 16.5366   1
  31 -39   1 151.105 18.5868   3
 -11 -31  -1 20.9366 10.8470   1
 -11 -31  -1 44.3237 11.8548   2
 -11 -31  -1 55.9983 13.9963   3
  31 -42   1 50.8552 8.35271   3
  31 -42   1 54.3570 11.9447   1
 -42  11   1 57.7046 5.26165   3
 -42  11   1 45.4184 4.87314   3
 -42  11   1 83.8339 16.8492   2
 -14 -31  -1 5.03726 6.58815   3
 -14 -31  -1 -3.0889 4.56959   2
 -45  14   1 -0.8140 4.87040   2
  31 -45   1 6.03026 5.63280   1
  31 -45   1 14.5865 5.71286   3
 -17 -31  -1 15.4912 7.94382   2
 -17 -31  -1 13.0657 8.12490   3
  31 -48   1 12.8599 6.15449   3
 -48  17   1 11.5145 7.24334   2
  31 -48   1 2.53937 4.82457   1
 -20 -31  -1 16.3901 9.49012   2
 -20 -31  -1 35.8142 12.2300   3
  31 -51   1 28.3651 8.39195   3
  31 -51   1 17.9284 8.39274   1
 -51  20   1 25.5593 9.86656   2
 -23 -31  -1 22.7009 10.3881   2
 -23 -31  -1 30.9200 12.9819   3
  31 -54   1 27.1637 9.38405   3
 -54  23   1 20.8290 9.51283   2
 -26 -31  -1 87.0570 19.4679   3
 -26 -31  -1 61.3497 16.7893   2
  31 -57   1 41.7984 12.5278   3
 -57  26   1 51.5987 13.8363   2
 -32 -25  -1 19.1837 10.4020   3
 -32 -25  -1 4.88051 7.58463   2
 -57  32   1 9.06297 6.79193   2
  25 -57   1 22.0602 9.85047   3
 -32 -22  -1 30.7098 11.5244   3
 -32 -22  -1 51.5965 14.8522   2
 -54  32   1 44.5124 11.0900   2
  22 -54   1 34.3468 10.6130   3
 -32 -19  -1 8.75433 7.59566   3
 -32 -19  -1 -8.6020 4.01683   2
 -51  32   1 -2.4874 4.04075   2
  19 -51   1 -1.5687 4.55713   3
  32  19   1 -1.0979 5.33730   1
 -32 -16  -1 56.6316 13.2944   3
 -32 -16  -1 56.5692 14.7885   2
 -48  32   1 38.0491 9.15431   2
  16 -48   1 44.4833 12.7560   3
  16 -48   1 50.5160 6.56369   2
  16 -48   1 77.1487 28.5873   1
  32  16   1 48.4834 14.9528   1
 -32 -13  -1 118.027 20.8007   2
 -32 -13  -1 110.406 16.3397   3
  45 -32  -1 114.390 18.0221   1
  13 -45   1 113.339 16.3985   3
  13 -45   1 107.264 11.3556   2
  13 -45   1 126.093 17.2899   1
 -45  32   1 97.2452 12.2420   2
  32  13   1 98.0435 19.1337   1
 -32 -10  -1 0.29454 5.87838   2
  42 -32  -1 1.70615 4.06911   1
 -32 -10  -1 0.20723 5.09239   3
  10 -42   1 0.06291 3.82400   3
 -42  32   1 0.01564 2.81716   2
  10 -42   1 -1.1884 2.65884   2
  32  10   1 6.47307 7.65737   1
  10 -42   1 1.87060 4.72710   1
  39 -32  -1 16.4430 4.97363   2
  39 -32  -1 17.6096 6.90548   1
 -32  -7  -1 26.9840 8.17892   3
 -32  -7  -1 20.9671 9.30766   2
   7 -39   1 22.4507 8.32554   3
  32   7   1 20.0108 10.7576   1
   7 -39   1 3.59342 5.12528   1
 -39  32   1 17.9797 4.86325   2
   7 -39   1 15.7562 5.74771   2
  36 -32  -1 23.1077 7.44941   1
  36 -32  -1 18.7269 4.58294   2
 -32  -4  -1 21.7023 7.16076   3
  -4  36  -1 22.8430 6.46584   1
 -32  -4  -1 22.2865 8.86608   2
   4 -36   1 12.6884 5.09355   2
  32   4   1 29.0344 11.4314   1
   4 -36   1 14.8709 7.01777   1
   4 -36   1 24.5155 8.47809   3
 -36  32   1 19.3649 4.18059   2
 -32  -1  -1 465.736 34.5552   3
 -32  -1  -1 484.548 39.5967   2
  -1  33  -1 492.369 36.1312   1
  33 -32  -1 457.385 36.6291   1
  33 -32  -1 432.742 30.8150   2
   1 -33   1 454.394 38.8127   3
 -33  32   1 463.988 31.3622   2
  32   1   1 446.594 42.2882   1
   1 -33   1 501.639 36.8925   2
   1 -33   1 507.201 40.9461   1
 -32   2  -1 23.8473 5.83856   3
 -32   2  -1 14.4227 6.23478   2
  30 -32  -1 15.3692 2.56244   2
  30 -32  -1 11.3000 5.24011   1
  30 -32  -1 19.9253 3.53703   3
  30 -32  -1 12.7807 2.85788   3
   2  30  -1 17.1585 5.85658   1
  32  -2   1 29.6405 11.3830   1
  -2 -30   1 24.6056 7.50980   2
  -2 -30   1 32.6231 10.0706   3
  -2 -30   1 17.0192 7.33833   1
 -32   5  -1 117.694 11.3323   3
 -32   5  -1 116.572 15.4118   2
  27 -32  -1 131.385 11.4379   3
  27 -32  -1 135.874 14.1919   1
   5  27  -1 119.250 14.7754   1
  27 -32  -1 113.434 10.6622   3
  -5 -27   1 134.100 17.7283   1
  -5 -27   1 125.302 15.5216   2
  -5 -27   1 139.910 16.9583   3
  32  -5   1 177.112 21.2758   1
  24 -32  -1 218.677 19.1129   1
  24 -32  -1 223.851 17.3478   3
 -32   8  -1 200.391 16.0220   3
   8  24  -1 167.976 19.5113   1
  24 -32  -1 204.212 16.7931   3
  -8 -24   1 183.901 20.7551   3
  -8 -24   1 230.633 21.3699   2
  -8 -24   1 217.505 22.9965   1
 -32  11  -1 98.5682 7.99359   3
  11  21  -1 120.299 15.2390   1
  21 -32  -1 110.059 12.2527   1
 -32  11  -1 88.7501 12.5366   2
 -32  11  -1 95.3923 7.93077   3
  21 -32  -1 114.278 11.3395   3
 -11 -21   1 112.733 14.8256   3
 -11 -21   1 120.868 16.2773   1
 -11 -21   1 116.824 15.0227   2
 -21  32   1 148.812 20.2527   3
 -32  14  -1 86.6407 11.4208   2
  18 -32  -1 87.4047 11.2912   1
  14  18  -1 89.8854 13.6959   1
  18 -32  -1 88.6728 10.6184   3
 -14 -18   1 60.8647 14.7357   3
 -14 -18   1 81.1470 12.5540   2
  15 -32  -1 97.1139 7.62192   2
  15 -32  -1 98.0284 11.6681   3
 -32  17  -1 93.9711 11.4077   2
  17  15  -1 92.3969 14.2083   1
  15 -32  -1 96.7936 7.65281   2
  15 -32  -1 107.324 12.4683   1
 -17 -15   1 87.6484 12.5018   3
 -17 -15   1 86.3045 13.3916   2
 -32  20  -1 32.6741 7.29406   2
  12 -32  -1 33.1834 4.44180   2
  12 -32  -1 32.8598 4.50999   2
  12 -32  -1 53.3999 9.04031   1
  12 -32  -1 26.6823 7.08724   3
 -20 -12   1 30.7270 8.90143   2
 -20 -12   1 40.7225 9.69372   3
 -12  32   1 34.3858 5.77761   1
 -32  23  -1 259.524 22.4865   2
   9 -32  -1 318.268 26.5636   1
   9 -32  -1 281.833 21.6049   2
   9 -32  -1 330.652 26.1868   3
  23   9  -1 305.220 29.0580   1
  -9  32   1 317.262 22.8530   2
  32 -23   1 274.799 23.6356   2
 -23  -9   1 298.623 28.2056   2
 -23  -9   1 322.215 26.4053   3
  -9  32   1 317.368 23.9683   1
  26   6  -1 259.137 26.4195   1
   6 -32  -1 221.211 22.6852   1
   6 -32  -1 226.084 19.0067   2
 -32  26  -1 239.882 18.9035   2
   6 -32  -1 248.614 22.6638   3
 -26  -6   1 278.839 26.0194   2
  -6  32   1 240.158 21.3355   2
  -6  32   1 275.472 22.0877   1
 -26  -6   1 245.044 22.4205   3
  29   3  -1 6.11834 6.31749   1
   3 -32  -1 4.20831 4.43316   3
   3 -32  -1 7.60511 4.96208   1
   3 -32  -1 6.75499 3.66145   2
 -32  29  -1 8.66525 3.33275   2
  -3  32   1 14.8113 5.77170   1
 -29  -3   1 1.82527 3.33735   3
 -29  -3   1 7.71768 5.85248   2
  32 -29   1 12.1546 3.73592   2
  32 -29   1 17.4684 6.25993   1
   0 -32  -1 0.51555 3.12583   2
 -32  32  -1 -1.1304 1.65053   2
   0 -32  -1 -3.6814 3.76732   1
  32   0  -1 2.01582 6.30560   1
   0 -32  -1 -0.9519 4.01643   3
 -32   0   1 2.29084 4.13295   2
 -32   0   1 5.19990 3.67325   3
   0  32   1 5.40726 4.54114   1
  32 -32   1 -1.2543 1.56549   2
  32 -32   1 1.90014 3.52882   1
  32 -32   1 -0.3238 1.10271   3
  32 -32   1 0.53198 1.28499   3
  -3 -32  -1 179.076 18.9558   2
  35  -3  -1 206.192 26.2599   1
  -3 -32  -1 186.496 22.7559   1
  -3 -32  -1 201.478 22.0687   3
  32 -35   1 186.737 18.6020   1
  32 -35   1 163.748 13.7109   2
 -35   3   1 225.941 22.7683   2
  32 -35   1 177.806 13.9486   2
   3  32   1 214.342 21.1999   1
  32 -35   1 184.627 14.5143   3
 -35   3   1 203.131 16.7424   3
  38  -6  -1 76.9364 18.3344   1
  -6 -32  -1 39.2163 9.57772   2
  -6 -32  -1 29.2130 10.3083   1
  -6 -32  -1 24.9522 9.41444   3
 -38   6   1 39.3569 6.29064   3
  32 -38   1 43.7499 9.90202   1
 -38   6   1 50.4754 11.6874   2
   6  32   1 53.2473 13.0796   1
  32 -38   1 45.3652 6.49260   3
 -38   6   1 40.5080 6.41390   3
  -9 -32  -1 108.337 15.8708   2
  -9 -32  -1 127.156 20.1073   1
  -9 -32  -1 123.812 18.6874   3
  32 -41   1 127.786 15.3259   1
 -41   9   1 124.245 10.8957   3
  32 -41   1 133.171 12.8011   3
   9  32   1 127.762 18.0074   1
 -41   9   1 142.448 18.5072   2
 -41   9   1 119.756 10.8917   3
 -12 -32  -1 15.2214 8.35973   3
 -12 -32  -1 3.99265 5.78070   2
 -44  12   1 9.29013 6.92378   2
  32 -44   1 14.2243 6.81719   1
  32 -44   1 7.00981 4.45746   3
 -15 -32  -1 7.94796 7.70473   2
 -15 -32  -1 20.6576 9.57977   3
  32 -47   1 9.89513 6.12057   1
 -47  15   1 22.2411 9.53492   2
  32 -47   1 20.4994 7.00150   3
 -18 -32  -1 105.636 19.3728   3
 -18 -32  -1 129.590 19.4714   2
 -50  18   1 104.652 17.0901   2
  32 -50   1 117.928 14.4591   3
  32 -50   1 86.2677 15.2628   1
 -21 -32  -1 14.7697 9.85938   2
 -21 -32  -1 17.5705 11.2107   3
 -53  21   1 38.3452 10.7746   2
  32 -53   1 11.7079 6.30952   3
 -24 -32  -1 5.00670 8.01869   3
 -24 -32  -1 6.72106 7.67421   2
  32 -56   1 5.97623 5.57132   3
 -56  24   1 9.24495 7.37583   2
 -33 -23  -1 57.5558 17.0565   2
 -33 -23  -1 51.2836 15.7666   3
  23 -56   1 82.6113 15.9557   3
 -56  33   1 99.0732 14.9917   2
 -33 -20  -1 82.5962 19.6265   2
 -33 -20  -1 77.9963 18.1998   3
  20 -53   1 56.5486 14.6558   3
 -53  33   1 67.4302 11.8997   2
 -33 -17  -1 10.6362 7.97784   3
 -33 -17  -1 36.0745 11.3999   2
  33  17   1 12.4258 9.25212   1
 -50  33   1 6.47099 5.12209   2
  17 -50   1 9.30007 6.98373   3
 -33 -14  -1 102.133 18.5682   2
 -33 -14  -1 101.861 16.4038   3
  33  14   1 70.7814 17.0276   1
 -47  33   1 107.726 12.4784   2
  14 -47   1 117.712 17.0035   3
  14 -47   1 76.3297 14.9375   1
  14 -47   1 97.8043 10.2683   2
 -33 -11  -1 6.02477 6.84273   3
 -33 -11  -1 -0.4059 6.27170   2
  44 -33  -1 7.99389 5.52617   1
  33  11   1 4.93759 7.55706   1
  11 -44   1 3.53815 5.05620   1
  11 -44   1 2.12385 5.33328   3
  11 -44   1 1.12938 3.13709   2
 -44  33   1 2.56742 3.01562   2
 -33  -8  -1 25.0544 9.95894   2
 -33  -8  -1 55.8088 11.0195   3
  41 -33  -1 40.1743 10.7301   1
  33   8   1 72.6143 17.2441   1
   8 -41   1 21.2305 9.14366   3
   8 -41   1 33.0183 10.5989   1
   8 -41   1 30.8090 7.66705   2
 -41  33   1 32.4435 6.66390   2
  38 -33  -1 5.61587 5.27078   1
 -33  -5  -1 14.4324 6.40337   3
  38 -33  -1 10.7841 3.77184   2
 -33  -5  -1 9.87130 6.24094   2
  33   5   1 -7.9504 3.41294   1
   5 -38   1 14.4110 7.56041   1
   5 -38   1 7.53210 6.68344   3
 -38  33   1 7.87977 3.07037   2
   5 -38   1 8.81432 4.64298   2
  -2  35  -1 346.781 33.3275   1
  35 -33  -1 329.922 23.8428   2
 -33  -2  -1 343.527 32.1253   2
  35 -33  -1 332.939 29.4888   1
 -33  -2  -1 361.035 27.9965   3
   2 -35   1 311.492 31.2485   1
   2 -35   1 364.642 28.5012   2
   2 -35   1 345.165 31.0635   3
 -35  33   1 326.329 24.5160   2
  33   2   1 340.449 35.0388   1
 -33   1  -1 470.595 38.6679   2
  32 -33  -1 464.576 29.5940   3
  32 -33  -1 435.790 35.9976   1
   1  32  -1 516.918 36.7848   1
  32 -33  -1 442.766 29.7193   2
  32 -33  -1 427.749 29.2619   3
 -33   1  -1 479.742 33.8250   3
  -1 -32   1 452.524 39.4391   3
 -32  33   1 484.007 31.1325   2
  33  -1   1 518.672 44.6640   1
  -1 -32   1 467.842 41.0539   1
  -1 -32   1 492.804 37.7604   2
  29 -33  -1 21.6616 6.60169   1
  29 -33  -1 24.4094 4.29777   3
   4  29  -1 30.9697 8.47814   1
  29 -33  -1 23.9408 4.57933   3
 -33   4  -1 24.2910 5.57821   3
 -33   4  -1 38.8716 9.81623   2
  -4 -29   1 36.5295 8.97065   2
  -4 -29   1 30.1252 9.93404   1
  -4 -29   1 22.7291 7.84882   3
  33  -4   1 60.8324 15.6515   1
  33  -4   1 23.5859 7.89728   3
  26 -33  -1 72.1568 10.0214   3
 -33   7  -1 82.1233 12.3658   2
  26 -33  -1 75.1278 10.4248   1
  26 -33  -1 58.4564 7.84943   3
 -33   7  -1 67.6633 7.68228   3
   7  26  -1 86.3624 12.4145   1
  -7 -26   1 90.0602 12.4929   2
  -7 -26   1 79.1416 13.7540   1
  -7 -26   1 66.2736 12.0383   3
  23 -33  -1 37.1171 7.40858   1
  23 -33  -1 39.6085 6.75636   3
 -33  10  -1 47.8654 5.05506   3
 -33  10  -1 37.2950 4.91257   3
 -33  10  -1 55.7962 14.2844   2
 -10 -23   1 51.2416 11.2713   2
 -10 -23   1 44.9900 10.2807   3
 -10 -23   1 47.0240 11.3333   1
  20 -33  -1 31.8867 7.40158   1
  20 -33  -1 34.8305 7.14087   3
 -33  13  -1 23.3079 7.55294   2
  13  20  -1 15.0997 6.93473   1
 -13 -20   1 24.2252 9.16167   2
 -13 -20   1 33.4342 9.42664   3
  17 -33  -1 38.1267 7.57042   3
 -33  16  -1 45.7536 9.02765   2
  16  17  -1 44.7983 12.1062   1
  17 -33  -1 37.5578 3.15077   2
  17 -33  -1 37.7741 3.11156   2
  17 -33  -1 31.7350 7.56257   1
 -16 -17   1 28.6941 8.89592   2
 -16 -17   1 52.1192 11.6356   3
  19  14  -1 184.678 20.7753   1
  14 -33  -1 164.546 12.5568   2
  14 -33  -1 166.921 12.6112   2
  14 -33  -1 172.172 16.8898   3
 -33  19  -1 170.606 16.3324   2
  14 -33  -1 190.633 18.1228   1
 -14  33   1 191.059 15.4825   1
 -19 -14   1 151.230 17.8484   3
 -19 -14   1 178.359 19.7470   2
 -33  22  -1 89.2684 10.0480   2
  22  11  -1 67.7138 12.8918   1
  11 -33  -1 57.5464 10.5772   1
  11 -33  -1 71.9998 7.45332   2
  11 -33  -1 74.1500 7.58552   2
  11 -33  -1 77.3598 10.9110   3
 -22 -11   1 85.7644 11.9083   3
 -11  33   1 67.6587 8.54782   1
 -22 -11   1 78.5402 13.2138   2
  25   8  -1 82.0321 14.8279   1
   8 -33  -1 105.047 13.4241   1
   8 -33  -1 73.6436 8.72360   2
 -33  25  -1 69.8245 9.22518   2
   8 -33  -1 84.1808 12.3532   3
 -25  -8   1 109.968 13.4761   3
  -8  33   1 89.7994 10.6371   1
 -25  -8   1 82.0235 14.1266   2
   5 -33  -1 32.4805 8.98956   1
   5 -33  -1 39.6802 10.2491   3
  28   5  -1 55.1667 13.8701   1
 -33  28  -1 44.5798 6.44176   2
   5 -33  -1 45.6026 7.16106   2
  -5  33   1 50.7922 7.54358   2
  -5  33   1 42.1037 7.96387   1
 -28  -5   1 44.3796 9.23586   3
 -28  -5   1 43.9546 10.7234   2
   2 -33  -1 158.580 17.7814   3
   2 -33  -1 145.938 14.6761   2
  31   2  -1 139.334 20.4549   1
 -33  31  -1 145.048 12.3060   2
   2 -33  -1 114.725 16.9774   1
  -2  33   1 148.190 15.9001   1
 -31  -2   1 118.364 16.7614   2
  33 -31   1 133.738 14.9210   1
  33 -31   1 119.851 11.5581   2
  34  -1  -1 723.916 57.5982   1
  -1 -33  -1 644.917 51.1864   3
  -1 -33  -1 638.493 53.1328   1
  -1 -33  -1 673.430 48.6472   2
   1  33   1 644.191 47.5166   1
 -34   1   1 634.386 43.8645   3
  33 -34   1 602.130 39.5469   3
 -34   1   1 720.466 50.8639   2
  33 -34   1 590.871 39.4102   3
  33 -34   1 698.118 46.8052   1
  33 -34   1 564.404 40.8017   2
  -4 -33  -1 109.326 16.8827   3
  37  -4  -1 149.548 37.5053   1
  -4 -33  -1 113.174 15.0897   2
  -4 -33  -1 142.639 19.4892   1
  33 -37   1 109.990 9.03758   2
 -37   4   1 177.502 19.4304   2
  33 -37   1 118.700 10.2654   3
  33 -37   1 106.874 9.08613   2
   4  33   1 123.583 16.4019   1
  33 -37   1 122.428 10.7275   3
 -37   4   1 123.565 12.0966   3
  -7 -33  -1 66.1101 15.4597   3
  -7 -33  -1 31.9897 9.88015   2
  40  -7  -1 46.7977 14.8660   1
  -7 -33  -1 32.4505 12.0203   1
 -40   7   1 43.9976 12.7030   2
  33 -40   1 47.0985 7.41670   3
  33 -40   1 38.9327 6.87794   3
 -40   7   1 55.8350 7.18668   3
  33 -40   1 40.9937 9.75016   1
 -40   7   1 48.8666 7.04391   3
   7  33   1 56.3964 13.2017   1
 -10 -33  -1 18.2496 8.17973   2
 -10 -33  -1 15.8914 8.77209   3
  43 -10  -1 15.2842 11.1136   1
 -43  10   1 11.0414 3.23853   3
  33 -43   1 17.9329 6.94397   1
 -43  10   1 14.9436 3.66001   3
  10  33   1 29.8372 17.8683   1
  33 -43   1 17.0392 5.31748   3
 -43  10   1 17.0349 8.62306   2
 -13 -33  -1 145.120 21.1483   3
 -13 -33  -1 172.951 20.8710   2
  33 -46   1 155.755 18.5228   1
 -46  13   1 159.462 20.5711   2
  33 -46   1 144.912 15.2955   3
 -16 -33  -1 35.4040 12.9367   2
 -16 -33  -1 42.8539 13.1006   3
 -49  16   1 50.7985 13.1307   2
  33 -49   1 51.2072 12.5147   1
  33 -49   1 53.5044 10.8960   3
 -19 -33  -1 25.9805 11.1406   3
 -19 -33  -1 37.7067 12.6426   2
  33 -52   1 30.5645 9.06647   3
 -52  19   1 17.0724 9.40160   2
 -22 -33  -1 63.9398 16.5110   2
 -22 -33  -1 72.0900 18.3188   3
 -55  22   1 75.7814 16.6752   2
  33 -55   1 65.7520 12.2646   3
 -25 -33  -1 5.27526 8.95503   3
 -25 -33  -1 -2.3468 5.16125   2
 -58  25   1 -1.1978 5.06065   2
  33 -58   1 16.0114 9.04426   3
 -34 -24  -1 10.3492 7.84404   3
 -34 -24  -1 8.05311 14.8629   2
  24 -58   1 12.3970 8.87023   3
 -58  34   1 13.3227 7.28571   2
 -34 -21  -1 40.2244 12.3742   3
 -34 -21  -1 60.1341 17.4635   2
 -55  34   1 57.7131 12.8206   2
  21 -55   1 75.8076 14.6388   3
 -34 -18  -1 8.54258 8.34549   2
 -34 -18  -1 2.08180 5.04467   3
  18 -52   1 8.30930 7.07543   3
  34  18   1 2.82018 7.85633   1
 -52  34   1 -1.3457 3.34463   2
 -34 -15  -1 41.0268 12.9495   2
 -34 -15  -1 48.9232 12.7735   3
  34  15   1 37.4749 14.6650   1
  15 -49   1 37.3853 6.12609   2
  15 -49   1 30.9430 10.8655   3
 -34 -12  -1 80.5311 13.8997   3
 -34 -12  -1 59.3118 15.3316   2
  12 -46   1 90.0771 15.2826   1
  12 -46   1 65.1952 8.85915   2
  12 -46   1 68.0762 13.3447   3
  34  12   1 54.8500 15.6519   1
 -46  34   1 65.0039 9.54382   2
  43 -34  -1 10.8020 6.63792   1
 -34  -9  -1 22.7218 9.24198   2
 -34  -9  -1 13.7100 6.57455   3
   9 -43   1 3.81891 4.31180   2
 -43  34   1 9.07220 4.13791   2
   9 -43   1 4.79557 4.52949   3
  34   9   1 18.4228 9.95587   1
   9 -43   1 8.83687 6.42422   1
  40 -34  -1 8.22723 5.69301   1
 -34  -6  -1 4.03174 6.32795   2
 -34  -6  -1 10.6951 5.71655   3
  40 -34  -1 2.61099 3.06729   2
   6 -40   1 5.86934 5.03484   3
  34   6   1 2.53938 5.50437   1
   6 -40   1 7.21984 4.83588   2
   6 -40   1 5.55033 5.19412   1
 -40  34   1 11.7793 3.75769   2
 -34  -3  -1 347.890 27.0743   3
 -34  -3  -1 343.545 31.6423   2
  37 -34  -1 292.246 22.4238   2
  37 -34  -1 333.444 29.0417   1
  -3  37  -1 293.481 26.0276   1
   3 -37   1 333.385 30.1352   3
   3 -37   1 315.197 26.4594   2
   3 -37   1 316.688 30.7600   1
 -37  34   1 293.825 22.7053   2
  34   3   1 315.134 33.9476   1
   0  34  -1 1.80857 3.96107   1
  34 -34  -1 0.88237 1.83966   2
  34 -34  -1 5.81670 5.12194   1
   0 -34   1 -1.7166 4.62319   1
   0 -34   1 2.49049 5.42620   3
 -34  34   1 3.91785 1.90794   2
   0 -34   1 -0.3436 3.07706   2
   3  31  -1 315.183 27.7476   1
  31 -34  -1 293.378 26.7419   1
 -34   3  -1 324.088 29.7796   2
  31 -34  -1 342.789 22.5425   3
  31 -34  -1 310.336 22.6758   3
 -34   3  -1 289.691 24.0264   3
  -3 -31   1 318.218 28.1680   2
  -3 -31   1 333.670 30.4708   3
  34  -3   1 381.639 35.4206   1
  -3 -31   1 278.447 39.2494   1
   6  28  -1 67.1995 11.8414   1
  28 -34  -1 66.3792 10.8622   1
  28 -34  -1 83.8890 8.98024   3
 -34   6  -1 90.0951 13.6243   2
 -34   6  -1 80.6593 8.78296   3
  28 -34  -1 86.0538 8.74664   3
  -6 -28   1 87.6499 15.0351   2
  -6 -28   1 73.4844 13.2216   3
  -6 -28   1 79.6549 14.2207   1
  34  -6   1 108.722 17.6532   1
 -34   9  -1 125.198 10.6570   3
 -34   9  -1 113.168 15.2497   2
  25 -34  -1 119.782 13.9548   1
  25 -34  -1 134.897 12.6019   3
  -9 -25   1 122.049 15.6400   2
  -9 -25   1 105.342 15.5764   3
  -9 -25   1 136.008 17.9312   1
 -34  12  -1 65.9672 13.0792   2
 -34  12  -1 52.2809 4.68406   3
  22 -34  -1 53.7516 8.95108   1
 -34  12  -1 47.3116 4.61250   3
  12  22  -1 61.1758 11.7130   1
  22 -34  -1 45.1964 9.00827   3
 -12 -22   1 53.7004 10.8800   3
 -12 -22   1 60.3822 10.7982   2
  19 -34  -1 90.5365 11.2111   1
  15  19  -1 73.6928 12.9959   1
 -34  15  -1 71.7851 10.7556   2
  19 -34  -1 59.7947 9.36941   3
 -15 -19   1 51.9654 11.4722   3
 -15 -19   1 72.4330 11.8736   2
 -34  18  -1 42.1702 9.09230   2
  16 -34  -1 42.9707 4.27744   2
  16 -34  -1 50.2757 9.13782   1
  18  16  -1 46.5104 11.1778   1
  16 -34  -1 57.2783 8.94638   3
  16 -34  -1 45.6621 4.30836   2
 -18 -16   1 60.6445 12.5351   3
 -18 -16   1 54.2537 12.8412   2
  13 -34  -1 162.844 13.0599   2
  13 -34  -1 174.787 18.2778   1
  21  13  -1 181.720 21.1475   1
  13 -34  -1 183.242 13.4020   2
  13 -34  -1 161.092 17.0787   3
 -34  21  -1 181.053 16.6673   2
 -13  34   1 160.502 14.5873   1
 -21 -13   1 211.298 25.9702   3
 -21 -13   1 182.452 20.2732   2
  10 -34  -1 123.223 16.1231   1
  10 -34  -1 145.321 12.5429   2
  10 -34  -1 143.504 16.1359   3
  24  10  -1 145.487 19.4775   1
 -34  24  -1 154.749 14.3670   2
  10 -34  -1 153.263 12.7429   2
 -24 -10   1 155.487 18.7748   2
 -10  34   1 134.614 14.0009   1
 -24 -10   1 150.925 16.3848   3
  27   7  -1 350.223 33.0173   1
   7 -34  -1 320.267 29.2127   1
 -34  27  -1 313.148 24.6044   2
   7 -34  -1 316.511 24.6774   2
   7 -34  -1 352.790 28.8963   3
  -7  34   1 336.104 26.6527   1
  -7  34   1 326.230 25.4863   2
 -27  -7   1 353.021 31.6055   2
 -27  -7   1 337.871 28.1982   3
   4 -34  -1 36.0268 9.99045   3
   4 -34  -1 37.2740 7.09275   2
  30   4  -1 35.9046 11.8828   1
   4 -34  -1 42.7338 10.3554   1
 -34  30  -1 28.9659 5.41442   2
  34 -30   1 35.0755 9.34778   1
 -30  -4   1 37.0877 8.63933   3
  34 -30   1 31.0098 5.80448   2
  -4  34   1 38.1819 9.07778   1
 -30  -4   1 63.6611 14.5824   2
   1 -34  -1 616.065 55.7058   1
  33   1  -1 719.233 55.7512   1
 -34  33  -1 604.781 42.2568   2
   1 -34  -1 641.836 46.1581   2
   1 -34  -1 652.248 49.7716   3
  -1  34   1 679.788 48.4755   1
 -33  -1   1 745.268 52.3987   2
  34 -33   1 615.254 47.0427   1
 -33  -1   1 573.465 45.0698   3
  -2 -34  -1 169.065 19.6983   3
  -2 -34  -1 85.8409 20.5322   2
  36  -2  -1 147.603 22.8145   1
  -2 -34  -1 113.053 17.8775   1
   2  34   1 130.108 16.5637   1
  34 -36   1 123.184 9.96999   3
  34 -36   1 167.115 16.7548   1
 -36   2   1 141.622 18.4757   2
  34 -36   1 136.501 10.2321   3
 -36   2   1 142.280 13.7760   3
  34 -36   1 104.896 10.3825   2
  39  -5  -1 20.3176 11.4087   1
  -5 -34  -1 13.5221 7.25659   3
  -5 -34  -1 30.1995 8.83732   2
  -5 -34  -1 5.45085 5.93131   1
 -39   5   1 25.1121 7.79199   3
  34 -39   1 26.2289 7.70408   1
 -39   5   1 18.4426 5.08137   3
  34 -39   1 21.5994 4.70450   3
   5  34   1 16.7451 8.30973   1
  34 -39   1 25.7648 5.34638   3
 -39   5   1 42.5067 12.0214   2
  42  -8  -1 63.7153 16.7732   1
  -8 -34  -1 52.1247 13.6495   3
  -8 -34  -1 83.6520 32.3396   1
  -8 -34  -1 49.2163 12.3099   2
 -42   8   1 43.5683 8.31479   3
 -42   8   1 66.2136 13.8959   2
  34 -42   1 54.9333 11.9396   1
 -42   8   1 42.4080 6.29562   3
   8  34   1 45.2544 13.2854   1
  34 -42   1 45.7021 7.10546   3
 -11 -34  -1 69.4153 16.8584   3
 -11 -34  -1 81.0177 14.5175   2
  45 -11  -1 114.924 21.4750   1
  34 -45   1 94.5617 10.9330   3
 -45  11   1 80.8413 15.4716   2
  34 -45   1 68.5864 12.4691   1
  48 -14  -1 -0.6758 5.80723   1
 -14 -34  -1 12.3431 8.88069   3
 -14 -34  -1 22.4626 9.87334   2
  34 -48   1 27.6574 10.0073   1
  34 -48   1 28.2245 7.79559   3
 -48  14   1 32.3227 10.7216   2
 -17 -34  -1 42.4639 12.3692   2
 -17 -34  -1 30.6660 11.3653   3
  34 -51   1 48.4403 9.81442   3
 -51  17   1 42.5700 13.1524   2
 -20 -34  -1 61.4608 15.9424   2
 -20 -34  -1 62.2360 16.6036   3
 -54  20   1 65.6298 15.9233   2
  34 -54   1 65.0341 11.7298   3
 -23 -34  -1 110.846 20.3893   2
 -23 -34  -1 111.301 20.9505   3
  34 -57   1 97.0668 14.5434   3
 -57  23   1 110.331 18.0447   2
 -35 -22  -1 48.3107 14.4776   3
 -35 -22  -1 28.7871 14.2067   2
 -57  35   1 19.4858 8.39863   2
  22 -57   1 37.2386 12.1355   3
 -35 -19  -1 22.9675 10.3034   3
 -35 -19  -1 30.1432 13.1550   2
 -54  35   1 13.8816 6.27036   2
  19 -54   1 26.6761 10.7214   3
 -35 -16  -1 21.0431 11.1251   2
 -35 -16  -1 25.5114 12.0901   3
  35  16   1 31.7975 14.4396   1
 -51  35   1 19.7055 6.70884   2
  16 -51   1 5.25311 6.56632   3
 -35 -13  -1 9.10838 6.89329   3
 -35 -13  -1 26.6372 11.5100   2
  13 -48   1 9.13348 3.82905   2
  13 -48   1 1.08079 4.99675   3
  35  13   1 26.8366 13.1964   1
 -48  35   1 8.04325 4.39402   2
 -35 -10  -1 19.0464 8.59392   3
 -35 -10  -1 35.9599 12.2082   2
 -45  35   1 14.2111 4.60584   2
  10 -45   1 27.9573 7.20564   2
  10 -45   1 14.4737 8.14378   1
  35  10   1 28.6528 13.4539   1
  10 -45   1 40.6422 11.3815   3
 -35  -7  -1 134.642 20.2189   2
 -35  -7  -1 143.587 17.0269   3
  42 -35  -1 145.066 18.1840   1
   7 -42   1 163.645 16.3471   2
   7 -42   1 167.510 20.3112   3
 -42  35   1 162.678 14.0181   2
  35   7   1 139.297 22.5794   1
   7 -42   1 164.609 21.2249   1
  39 -35  -1 3.73562 2.62134   2
 -35  -4  -1 15.7067 6.06441   3
 -35  -4  -1 9.61870 7.75519   2
  39 -35  -1 6.26627 5.14297   1
   4 -39   1 -2.1529 4.16667   3
   4 -39   1 4.68953 4.43909   2
   4 -39   1 3.61674 5.34352   1
  35   4   1 33.3087 11.0637   1
 -39  35   1 1.46397 2.33120   2
 -35  -1  -1 364.691 27.6116   3
  36 -35  -1 298.003 22.5561   2
  36 -35  -1 346.903 29.9938   1
 -35  -1  -1 391.899 33.5239   2
  -1  36  -1 325.720 28.1466   1
  35   1   1 423.955 37.9689   1
   1 -36   1 328.619 30.6595   3
   1 -36   1 274.109 30.5732   1
 -36  35   1 312.124 21.7009   2
   1 -36   1 325.663 27.7948   2
  33 -35  -1 336.675 28.8044   1
  33 -35  -1 341.829 22.3947   3
  33 -35  -1 303.698 21.8864   3
   2  33  -1 344.469 28.9703   1
 -35   2  -1 347.475 31.6361   2
 -35   2  -1 338.300 25.9567   3
  -2 -33   1 336.865 31.7679   3
  -2 -33   1 348.692 33.6793   1
  35  -2   1 369.332 36.7417   1
  30 -35  -1 198.344 15.9885   3
 -35   5  -1 202.729 21.8874   2
   5  30  -1 210.931 20.9863   1
  30 -35  -1 183.516 19.0295   1
 -35   5  -1 181.667 16.2004   3
  30 -35  -1 205.075 15.4896   3
  -5 -30   1 211.396 20.8112   2
  -5 -30   1 157.585 20.4496   3
  -5 -30   1 227.991 24.3007   1
  35  -5   1 209.280 26.5602   1
   8  27  -1 215.883 21.4555   1
  27 -35  -1 194.739 18.8621   1
 -35   8  -1 186.851 15.1250   3
 -35   8  -1 179.669 14.9781   3
  27 -35  -1 198.774 16.2615   3
 -35   8  -1 181.884 20.4512   2
  -8 -27   1 197.362 21.9368   3
  -8 -27   1 210.614 23.8298   1
  -8 -27   1 203.745 20.9296   2
 -35  11  -1 355.513 24.0032   3
 -35  11  -1 347.759 23.9232   3
  24 -35  -1 334.961 28.8695   1
 -35  11  -1 363.603 30.9516   2
  24 -35  -1 393.674 27.7149   3
 -11 -24   1 352.832 32.3088   3
 -11 -24   1 390.277 32.2292   2
 -35  14  -1 194.294 18.8611   2
  21 -35  -1 156.930 15.7535   3
  21 -35  -1 161.868 17.0651   1
  14  21  -1 156.445 19.5133   1
 -14 -21   1 167.995 19.0698   3
 -14 -21   1 168.425 19.2130   2
  17  18  -1 70.0104 12.8608   1
 -35  17  -1 67.1122 10.3682   2
  18 -35  -1 62.4324 10.1673   1
  18 -35  -1 55.3428 9.44794   3
 -17 -18   1 59.2619 11.2808   3
 -17 -18   1 59.8715 11.3208   2
  15 -35  -1 128.615 10.1401   2
  15 -35  -1 174.200 16.2196   3
  15 -35  -1 129.603 10.1243   2
 -35  20  -1 107.886 13.5125   2
  20  15  -1 118.724 17.1836   1
  15 -35  -1 157.310 16.4139   1
 -20 -15   1 113.815 15.9963   2
 -20 -15   1 127.307 15.6467   3
  12 -35  -1 129.208 14.7857   3
  12 -35  -1 132.879 15.3571   1
  12 -35  -1 93.9913 9.66603   2
  23  12  -1 136.186 18.0200   1
 -35  23  -1 105.589 12.3117   2
  12 -35  -1 110.889 9.98550   2
 -23 -12   1 126.348 15.7342   3
 -12  35   1 117.081 11.8967   1
 -23 -12   1 137.272 17.4776   2
   9 -35  -1 508.260 36.9543   2
  26   9  -1 538.856 45.4736   1
   9 -35  -1 557.876 41.6747   3
   9 -35  -1 538.312 42.4302   1
 -35  26  -1 542.319 38.3174   2
 -26  -9   1 601.085 46.4150   2
 -26  -9   1 547.890 42.9117   3
   6 -35  -1 228.839 23.6694   3
   6 -35  -1 256.164 20.8287   2
  29   6  -1 310.414 29.9677   1
 -35  29  -1 261.652 20.2582   2
   6 -35  -1 240.200 25.0477   1
 -29  -6   1 266.727 26.4236   2
  35 -29   1 231.049 20.3445   2
  -6  35   1 251.990 21.8670   1
 -29  -6   1 258.405 22.6939   3
   3 -35  -1 201.022 22.4545   1
  32   3  -1 226.197 25.7540   1
 -35  32  -1 177.789 15.2513   2
   3 -35  -1 172.337 20.4389   3
   3 -35  -1 187.904 17.5943   2
  -3  35   1 205.213 19.9822   1
 -32  -3   1 193.227 18.7755   3
  35 -32   1 193.253 19.9317   1
 -32  -3   1 208.230 23.3060   2
   0 -35  -1 4.29932 5.46547   1
 -35  35  -1 0.45106 2.45420   2
  35   0  -1 12.8775 9.00324   1
   0 -35  -1 -3.5968 4.41531   3
   0 -35  -1 0.12406 3.95615   2
  35 -35   1 0.24544 3.64761   1
  35 -35   1 -1.4237 2.06335   2
   0  35   1 2.07907 5.43279   1
 -35   0   1 26.3388 6.48965   3
 -35   0   1 11.0358 7.77845   2
  38  -3  -1 79.1846 20.4614   1
  -3 -35  -1 64.1775 12.7312   2
  -3 -35  -1 74.4383 17.9338   1
  -3 -35  -1 66.5623 15.0358   3
 -38   3   1 64.6502 8.92631   3
  35 -38   1 54.6211 6.02251   3
  35 -38   1 53.3663 5.88003   3
   3  35   1 59.2859 11.8468   1
  35 -38   1 63.1174 5.76561   2
 -38   3   1 77.5382 14.3921   2
  35 -38   1 58.8960 5.68628   2
  35 -38   1 55.4606 11.0350   1
  -6 -35  -1 131.352 16.5346   2
  -6 -35  -1 109.795 19.1679   1
  -6 -35  -1 131.463 19.2000   3
  41  -6  -1 123.357 21.7696   1
  35 -41   1 136.645 11.4772   3
  35 -41   1 124.304 15.7897   1
  35 -41   1 133.068 13.1697   3
 -41   6   1 122.101 18.4018   2
 -41   6   1 115.636 11.9887   3
   6  35   1 134.233 18.3008   1
  -9 -35  -1 85.1019 14.5779   2
  44  -9  -1 143.967 23.7176   1
 -44   9   1 82.1033 8.29884   3
  35 -44   1 75.8198 9.37510   3
 -44   9   1 117.394 17.2028   2
  35 -44   1 74.9343 12.7172   1
   9  35   1 95.4003 25.2453   1
 -12 -35  -1 24.7015 10.6527   3
 -12 -35  -1 39.5893 11.8565   2
  47 -12  -1 25.7103 13.3843   1
  35 -47   1 30.9435 9.77971   1
 -47  12   1 14.7154 8.99357   2
  35 -47   1 16.5950 5.56053   3
 -15 -35  -1 88.9119 19.5388   3
  50 -15  -1 75.5690 19.2727   1
 -15 -35  -1 66.5636 15.6758   2
  35 -50   1 76.6327 13.7146   1
 -50  15   1 44.4381 13.1591   2
  35 -50   1 77.2552 10.7608   3
 -18 -35  -1 32.6847 11.9529   2
  53 -18  -1 42.4049 17.2346   1
 -18 -35  -1 26.6429 12.4642   3
  35 -53   1 40.0685 9.63601   3
 -53  18   1 47.6131 13.6539   2
 -21 -35  -1 47.2395 15.2044   2
  56 -21  -1 25.6897 15.7889   1
 -21 -35  -1 40.0188 14.4342   3
 -56  21   1 38.3527 11.9901   2
  35 -56   1 24.8506 8.54256   3
 -36 -20  -1 14.3019 11.0975   2
 -36 -20  -1 28.1395 11.3063   3
 -56  36   1 40.9074 11.8368   2
  20 -56   1 18.0443 8.53534   3
 -36 -17  -1 58.9668 15.3659   3
 -36 -17  -1 37.1846 14.1304   2
  17 -53   1 32.8387 11.4841   3
  36  17   1 35.8275 13.8099   1
 -53  36   1 57.8673 9.92803   2
 -36 -14  -1 29.7805 12.4841   2
 -36 -14  -1 28.6945 11.6805   3
 -50  36   1 34.9202 8.12107   2
  14 -50   1 41.6704 13.0463   3
  36  14   1 32.4833 12.7157   1
 -36 -11  -1 42.4592 14.0731   2
 -36 -11  -1 21.1489 8.91804   3
  36  11   1 13.1978 9.48845   1
  11 -47   1 28.7604 9.91336   3
 -47  36   1 22.4961 5.74811   2
  11 -47   1 22.4355 6.21976   2
  44 -36  -1 32.8036 10.1000   1
 -36  -8  -1 46.9727 11.4692   3
 -36  -8  -1 24.9019 11.6238   2
   8 -44   1 29.2853 10.3378   3
  36   8   1 31.6564 12.4195   1
   8 -44   1 42.2043 8.60573   2
   8 -44   1 32.3821 11.5659   1
 -44  36   1 33.5586 5.99993   2
 -36  -5  -1 29.6138 8.17356   3
  41 -36  -1 10.8622 6.64949   1
 -36  -5  -1 15.8890 8.51653   2
  36   5   1 41.5763 17.7454   1
   5 -41   1 14.1430 7.61738   1
 -41  36   1 15.0852 4.07147   2
   5 -41   1 18.0668 7.74013   3
   5 -41   1 8.22056 5.19209   2
 -36  -2  -1 9.15580 4.82456   3
 -36  -2  -1 13.4752 8.41929   2
  38 -36  -1 1.09157 1.79731   2
  38 -36  -1 9.33343 5.97280   1
   2 -38   1 -4.4131 3.39856   3
 -38  36   1 1.62812 1.72650   2
   2 -38   1 2.84506 4.76507   1
 -36   1  -1 357.747 32.9619   2
   1  35  -1 288.830 28.2748   1
  35 -36  -1 307.880 29.1332   1
 -36   1  -1 363.129 27.1193   3
  35 -36  -1 343.998 21.8015   2
  36  -1   1 390.992 43.9418   1
  -1 -35   1 333.785 31.7169   3
  -1 -35   1 319.265 32.7767   1
  -1 -35   1 334.917 29.0907   2
 -36   4  -1 23.4655 5.72411   3
 -36   4  -1 15.4011 7.33261   2
  32 -36  -1 13.8037 6.14485   1
  32 -36  -1 21.9011 4.15467   3
  32 -36  -1 22.9105 4.56499   3
   4  32  -1 12.4719 6.68494   1
  36  -4   1 25.9711 11.4852   1
  -4 -32   1 12.0770 6.24833   2
  -4 -32   1 24.6703 9.29571   3
  -4 -32   1 4.91215 5.83044   1
 -36   7  -1 48.6243 6.50237   3
  29 -36  -1 48.5538 6.85349   3
  29 -36  -1 53.6111 10.8653   1
   7  29  -1 61.0906 12.9591   1
 -36   7  -1 37.7085 10.0646   2
  36  -7   1 65.2802 15.4436   1
  -7 -29   1 38.0590 11.6306   3
  -7 -29   1 35.7089 9.33397   2
  -7 -29   1 38.6198 11.0969   1
  26 -36  -1 103.117 11.1276   3
 -36  10  -1 124.178 15.2870   2
  26 -36  -1 106.393 13.0888   1
 -36  10  -1 87.9381 8.59968   3
 -36  10  -1 84.0806 8.43464   3
 -10 -26   1 89.8089 13.6939   2
 -10 -26   1 87.1378 15.2780   1
 -10 -26   1 83.1795 14.6152   3
  13  23  -1 308.694 29.5403   1
 -36  13  -1 275.922 26.4776   2
  23 -36  -1 312.624 24.6396   3
  23 -36  -1 305.939 26.3397   1
 -13 -23   1 283.803 27.4112   3
 -13 -23   1 290.174 27.3686   2
 -36  16  -1 39.3158 9.93438   2
  16  20  -1 36.7065 11.6468   1
  20 -36  -1 25.7541 7.16356   3
  20 -36  -1 47.5949 10.6877   1
 -16 -20   1 46.6988 12.0396   2
 -16 -20   1 20.3310 8.58296   3
  17 -36  -1 153.681 16.1502   3
  17 -36  -1 144.693 10.0742   2
  19  17  -1 134.237 18.7212   1
  17 -36  -1 160.878 17.1811   1
 -36  19  -1 149.135 15.9708   2
 -19 -17   1 149.585 18.2211   2
 -19 -17   1 132.729 17.0487   3
  14 -36  -1 141.742 16.4888   1
  22  14  -1 159.132 19.9220   1
  14 -36  -1 127.199 10.7058   2
  14 -36  -1 128.388 15.6587   3
  14 -36  -1 144.804 10.9877   2
 -36  22  -1 105.051 13.5905   2
 -22 -14   1 141.518 19.0316   2
 -22 -14   1 177.077 18.5662   3
 -14  36   1 143.509 13.9321   1
 -36  25  -1 64.4918 9.45898   2
  11 -36  -1 68.0757 7.87089   2
  11 -36  -1 65.7525 7.72037   2
  25  11  -1 80.7234 14.4084   1
  11 -36  -1 55.9907 11.3265   3
  11 -36  -1 77.5833 12.5103   1
 -25 -11   1 61.7864 13.7632   2
 -11  36   1 58.6037 8.49770   1
 -25 -11   1 78.1243 12.4255   3
  28   8  -1 89.6864 16.2651   1
   8 -36  -1 88.4254 10.3727   2
   8 -36  -1 110.476 14.5231   3
 -36  28  -1 96.0558 10.8234   2
   8 -36  -1 117.428 15.3389   1
  -8  36   1 97.5298 12.6889   1
  -8  36   1 111.376 11.4018   2
 -28  -8   1 88.0603 15.1105   3
 -28  -8   1 118.292 16.6676   2
   5 -36  -1 7.98691 5.29847   1
   5 -36  -1 14.4209 4.97229   2
  31   5  -1 20.9642 9.36255   1
   5 -36  -1 12.3115 6.37071   3
 -36  31  -1 10.5400 3.82059   2
  36 -31   1 8.99050 3.73149   2
 -31  -5   1 14.4535 7.76691   2
  -5  36   1 9.49839 5.35508   1
 -31  -5   1 17.5260 6.12452   3
  36 -31   1 10.0282 5.25254   1
  34   2  -1 121.132 20.4730   1
   2 -36  -1 111.806 13.8856   2
   2 -36  -1 112.484 18.1613   1
   2 -36  -1 170.432 19.2816   3
 -36  34  -1 120.030 11.1064   2
 -34  -2   1 142.879 19.2520   2
  -2  36   1 131.319 15.7766   1
  36 -34   1 104.945 11.0508   2
 -34  -2   1 124.099 14.2416   3
  36 -34   1 131.732 15.9499   1
  37  -1  -1 148.445 24.2457   1
  -1 -36  -1 121.456 18.5974   1
  -1 -36  -1 94.1849 16.2905   3
  -1 -36  -1 106.125 13.9047   2
 -37   1   1 119.898 17.7777   2
  36 -37   1 113.838 10.2670   2
  36 -37   1 147.382 16.2717   1
   1  36   1 138.839 16.8623   1
 -37   1   1 113.081 12.9296   3
  -4 -36  -1 11.1466 7.04565   3
  -4 -36  -1 7.66874 7.10069   1
  -4 -36  -1 6.88573 5.42549   2
  40  -4  -1 3.73163 6.70352   1
   4  36   1 9.02486 6.60837   1
  36 -40   1 5.94328 4.84744   1
 -40   4   1 11.8801 4.45355   3
  36 -40   1 6.71386 2.53723   3
  36 -40   1 4.97368 2.98776   3
 -40   4   1 10.2395 7.55265   2
  -7 -36  -1 -1.8904 5.22539   3
  43  -7  -1 7.04947 8.14518   1
  -7 -36  -1 6.85275 5.89580   2
  36 -43   1 15.9078 4.30234   3
  36 -43   1 9.72985 5.89523   1
 -43   7   1 17.7786 10.0946   2
 -43   7   1 27.5403 5.30940   3
 -10 -36  -1 26.8398 11.0757   3
  46 -10  -1 33.0640 15.2304   1
 -10 -36  -1 31.4002 10.7787   2
  36 -46   1 38.3300 7.45624   3
 -46  10   1 34.5899 4.60422   3
  36 -46   1 45.2403 11.3332   1
 -46  10   1 37.5542 11.1509   2
  49 -13  -1 23.0393 12.6609   1
 -13 -36  -1 45.9041 15.5620   3
 -13 -36  -1 56.8311 14.2654   2
  36 -49   1 40.6169 8.18701   3
 -49  13   1 66.4388 14.5375   2
  36 -49   1 51.7684 12.8975   1
 -16 -36  -1 15.3634 9.33808   2
 -16 -36  -1 10.5005 8.80927   3
  52 -16  -1 9.32737 8.63344   1
  36 -52   1 5.57915 4.64850   3
 -52  16   1 7.89007 7.13918   2
 -19 -36  -1 -0.1372 6.91370   3
 -19 -36  -1 18.7224 9.05021   2
  55 -19  -1 -1.1362 9.17017   1
 -55  19   1 4.17421 6.13126   2
  36 -55   1 7.94303 5.93246   3
 -22 -36  -1 65.0024 19.5863   3
 -22 -36  -1 64.4787 18.0510   2
  58 -22  -1 31.7972 15.6774   1
 -58  22   1 48.1328 13.7924   2
 -37 -21  -1 12.7528 11.3136   2
 -37 -21  -1 17.6435 9.10214   3
  21 -58   1 3.26364 6.33260   3
 -37 -18  -1 97.8048 17.8553   3
 -37 -18  -1 113.540 24.8411   2
  18 -55   1 81.2528 16.0433   3
 -37 -15  -1 8.83219 7.31942   3
 -37 -15  -1 -4.5458 6.17658   2
 -52  37   1 5.74498 7.83226   2
  15 -52   1 4.85887 6.51267   3
  37  15   1 33.2865 19.7245   1
 -37 -12  -1 211.018 26.5374   2
 -37 -12  -1 160.976 20.7812   3
 -49  37   1 169.064 15.2774   2
  12 -49   1 140.813 14.3504   2
  12 -49   1 137.524 20.2502   3
[truncated: 5,896,691 more chars]
