# Supplementary material for: Water-Soluble Polyoxometal Clusters of Molybdenum (V) with Pyrazole and Triazole: Synthesis and Study of Cytotoxicity and Antiviral Activity
Source: Molecules. 2023 Dec 14;28(24):8079. doi: 10.3390/molecules28248079 (PMC10745505; doi:10.3390/molecules28248079)
Supplement: Supplementary file 1 [file molecules-28-08079-s001.zip › Compound 2.cif]

data_jul167-4
_publ_requested_journal          'Dalton Trans.'
_publ_contact_author_name        'Dr. Natalia V. Kuratieva'
_publ_contact_author_address     
;Nikolaev Institute of Inorganic Chemistry,
SB Russian Academy of Sciences,
Akad. Lavrentiev prospekt 3,
Novosibirsk,
630090 Russia
;


_publ_contact_author_email       kuratieva@gmail.com
_publ_contact_author_phone       7(383)3309466
_publ_contact_author_fax         7(383)3309489
loop_
_publ_author_name
_publ_author_address
'Konkova, Anna V.'
;Nikolaev Institute of Inorganic Chemistry,
SB Russian Academy of Sciences,
Akad. Lavrentiev prospekt 3,
Novosibirsk,
630090 Russia
;
'Savina, Iulia V.'
;Nikolaev Institute of Inorganic Chemistry,
SB Russian Academy of Sciences,
Akad. Lavrentiev prospekt 3,
Novosibirsk,
630090 Russia
;
'Evtushok, Darya V.'
;Nikolaev Institute of Inorganic Chemistry,
SB Russian Academy of Sciences,
Akad. Lavrentiev prospekt 3,
Novosibirsk,
630090 Russia
;
'Pozmogova, Tatiana N.'
;Nikolaev Institute of Inorganic Chemistry,
SB Russian Academy of Sciences,
Akad. Lavrentiev prospekt 3,
Novosibirsk,
630090 Russia
;
'Solomatina, Maria V.'
;Research Institute of Virology, 
Federal Research Center of Fundamental and Translational Medicine, 
2 Timakova St, Novosibirsk 
630117 Russia
;
'Nohova, Alina R.'
;Research Institute of Virology, 
Federal Research Center of Fundamental and Translational Medicine, 
2 Timakova St, Novosibirsk 
630117 Russia
;
'Alekseev, Alexander Y.'
;Research Institute of Virology, 
Federal Research Center of Fundamental and Translational Medicine, 
2 Timakova St, Novosibirsk 
630117 Russia
;
'Kuratieva, Natalia V.'
;Nikolaev Institute of Inorganic Chemistry,
SB Russian Academy of Sciences,
Akad. Lavrentiev prospekt 3,
Novosibirsk,
630090 Russia
;
'Eltsov, Ilia V.'
;Novosibirsk State University, 
2 Pirogov Str., 
Novosibirsk, 
630090 Russia
;
'Yanshole, Vadim V.'
;International Tomography Center SB RAS, 
3a Institutskaya Str., 
Novosibirsk, 
630090 Russia
;
'Shestopalov, Alexander M.'
;Research Institute of Virology, 
Federal Research Center of Fundamental and Translational Medicine, 
2 Timakova St, Novosibirsk 
630117 Russia
;
'Ivanov, Anton A.'
;Nikolaev Institute of Inorganic Chemistry,
SB Russian Academy of Sciences,
Akad. Lavrentiev prospekt 3,
Novosibirsk,
630090 Russia
;
'Shestopalov, Michael A.'
;Nikolaev Institute of Inorganic Chemistry,
SB Russian Academy of Sciences,
Akad. Lavrentiev prospekt 3,
Novosibirsk,
630090 Russia
;

_audit_creation_method           SHELXL-2014/7
_shelx_SHELXL_version_number     2014/7
_chemical_name_systematic        ?
_chemical_name_common            ?
_chemical_formula_moiety         '4(N H4), C16 H16 Mo12 N24 O28, 10(H2 O)'
_chemical_formula_sum            'C16 H52 Mo12 N28 O38'
_chemical_melting_point          ?

_exptl_crystal_description       prism
_exptl_crystal_colour            orange
_diffrn_ambient_temperature      150(2)
_chemical_formula_weight         2396.13

loop_
_atom_type_symbol
_atom_type_description
_atom_type_scat_dispersion_real
_atom_type_scat_dispersion_imag
_atom_type_scat_source
Mo Mo -1.6832 0.6857 'International Tables Vol C Tables 4.2.6.8 and 6.1.1.4'
O O 0.0106 0.0060 'International Tables Vol C Tables 4.2.6.8 and 6.1.1.4'
N N 0.0061 0.0033 'International Tables Vol C Tables 4.2.6.8 and 6.1.1.4'
C C 0.0033 0.0016 'International Tables Vol C Tables 4.2.6.8 and 6.1.1.4'
H H 0.0000 0.0000 'International Tables Vol C Tables 4.2.6.8 and 6.1.1.4'

_space_group_crystal_system      cubic
_space_group_IT_number           220
_space_group_name_H-M_alt        'I -4 3 d'
_space_group_name_Hall           'I -4bd 2c 3'

_shelx_space_group_comment       
;
The symmetry employed for this shelxl refinement is uniquely defined
by the following loop, which should always be used as a source of
symmetry information in preference to the above space-group names.
They are only intended as comments.
;

loop_
_space_group_symop_operation_xyz
'x, y, z'
'y+1/4, -x+3/4, -z+1/4'
'-x, -y+1/2, z'
'-y+1/4, x+1/4, -z+3/4'
'-x+1/4, z+1/4, -y+3/4'
'x, -y, -z+1/2'
'-x+3/4, -z+1/4, y+1/4'
'-z+3/4, -y+1/4, x+1/4'
'-x+1/2, y, -z'
'z+1/4, -y+3/4, -x+1/4'
'z, x, y'
'y, z, x'
'-y, -z+1/2, x'
'z, -x, -y+1/2'
'-y+1/2, z, -x'
'-z, -x+1/2, y'
'-z+1/2, x, -y'
'y, -z, -x+1/2'
'-y+3/4, -x+1/4, z+1/4'
'y+1/4, x+1/4, z+1/4'
'x+1/4, -z+3/4, -y+1/4'
'x+1/4, z+1/4, y+1/4'
'-z+1/4, y+1/4, -x+3/4'
'z+1/4, y+1/4, x+1/4'
'x+1/2, y+1/2, z+1/2'
'y+3/4, -x+5/4, -z+3/4'
'-x+1/2, -y+1, z+1/2'
'-y+3/4, x+3/4, -z+5/4'
'-x+3/4, z+3/4, -y+5/4'
'x+1/2, -y+1/2, -z+1'
'-x+5/4, -z+3/4, y+3/4'
'-z+5/4, -y+3/4, x+3/4'
'-x+1, y+1/2, -z+1/2'
'z+3/4, -y+5/4, -x+3/4'
'z+1/2, x+1/2, y+1/2'
'y+1/2, z+1/2, x+1/2'
'-y+1/2, -z+1, x+1/2'
'z+1/2, -x+1/2, -y+1'
'-y+1, z+1/2, -x+1/2'
'-z+1/2, -x+1, y+1/2'
'-z+1, x+1/2, -y+1/2'
'y+1/2, -z+1/2, -x+1'
'-y+5/4, -x+3/4, z+3/4'
'y+3/4, x+3/4, z+3/4'
'x+3/4, -z+5/4, -y+3/4'
'x+3/4, z+3/4, y+3/4'
'-z+3/4, y+3/4, -x+5/4'
'z+3/4, y+3/4, x+3/4'

_cell_length_a                   26.6106(4)
_cell_length_b                   26.6106(4)
_cell_length_c                   26.6106(4)
_cell_angle_alpha                90
_cell_angle_beta                 90
_cell_angle_gamma                90
_cell_volume                     18843.6(8)
_cell_formula_units_Z            12
_cell_measurement_temperature    150(2)
_cell_measurement_reflns_used      9856
_cell_measurement_theta_min        2.16
_cell_measurement_theta_max       30.25
_exptl_crystal_density_meas      ?
_exptl_crystal_density_method    ?
_exptl_crystal_density_diffrn    2.534
_exptl_crystal_F_000             13824
_exptl_transmission_factor_min   0.684
_exptl_transmission_factor_max   0.746
_exptl_crystal_size_max          0.06
_exptl_crystal_size_mid          0.06
_exptl_crystal_size_min          0.06
_exptl_absorpt_coefficient_mu    2.420
_shelx_estimated_absorpt_T_min   0.770
_shelx_estimated_absorpt_T_max   0.826

_exptl_absorpt_correction_type   multi-scan
_exptl_absorpt_correction_T_min  ?
_exptl_absorpt_correction_T_max  ?
_exptl_absorpt_process_details   'Bruker SADABS-2012/1'
_exptl_absorpt_special_details   ?


_diffrn_radiation_probe          x-ray
_diffrn_radiation_type           MoK\a
_diffrn_radiation_wavelength     0.71073
_diffrn_source                   ?
_diffrn_source_type              'Incoatec ImS 3.0'
_diffrn_measurement_device_type  'Bruker D8 VENTURE'
_diffrn_measurement_method       '\f and \w scans'
_diffrn_detector_area_resol_mean 7.4
_diffrn_reflns_number            180189
_diffrn_reflns_av_unetI/netI     0.0196
_diffrn_reflns_av_R_equivalents  0.0811
_diffrn_reflns_limit_h_min       -37
_diffrn_reflns_limit_h_max       37
_diffrn_reflns_limit_k_min       -38
_diffrn_reflns_limit_k_max       37
_diffrn_reflns_limit_l_min       -38
_diffrn_reflns_limit_l_max       38
_diffrn_reflns_theta_min         2.165
_diffrn_reflns_theta_max         30.495
_diffrn_reflns_theta_full        25.250
_diffrn_measured_fraction_theta_max 0.998
_diffrn_measured_fraction_theta_full 0.997
_diffrn_reflns_Laue_measured_fraction_max 0.998
_diffrn_reflns_Laue_measured_fraction_full 0.997
_diffrn_reflns_point_group_measured_fraction_max 0.999
_diffrn_reflns_point_group_measured_fraction_full 0.998
_reflns_number_total             4789
_reflns_number_gt                4537
_reflns_threshold_expression     >2\s(I)
_reflns_Friedel_coverage         0.890
_reflns_Friedel_fraction_max     0.999
_reflns_Friedel_fraction_full    0.998

_reflns_special_details          
;
 Reflections were merged by SHELXL according to the crystal
 class for the calculation of statistics and refinement.
 
 _reflns_Friedel_fraction is defined as the number of unique
 Friedel pairs measured divided by the number that would be
 possible theoretically, ignoring centric projections and
 systematic absences.
;


_computing_data_collection       'Bruker APEX3 V2018.7-2'
_computing_cell_refinement       'SAINT V8.38A'
_computing_data_reduction        'SAINT V8.38A'
_computing_structure_solution    'Bruker SHELXTL'
_computing_structure_refinement  'Bruker SHELXTL'
_computing_molecular_graphics    'Bruker SHELXTL'
_computing_publication_material  'Bruker SHELXTL'
_refine_special_details          
;
 Refined as a 2-component inversion twin.
;
_refine_ls_structure_factor_coef Fsqd
_refine_ls_matrix_type           full
_refine_ls_weighting_scheme      calc
_refine_ls_weighting_details     
'w=1/[\s^2^(Fo^2^)+(0.0230P)^2^+64.2499P] where P=(Fo^2^+2Fc^2^)/3'
_atom_sites_solution_primary     ?
_atom_sites_solution_secondary   ?
_atom_sites_solution_hydrogens   geom
_refine_ls_hydrogen_treatment    constr
_refine_ls_extinction_method     none
_refine_ls_extinction_coef       .
_refine_ls_abs_structure_details 
;
 Refined as an inversion twin.
;
_refine_ls_abs_structure_Flack   -0.05(6)
_symmetry_cell_setting           ?
_symmetry_space_group_name_h-m   ?
_symmetry_int_tables_number      ?
_chemical_absolute_configuration ?
_refine_ls_number_reflns         4789
_refine_ls_number_parameters     254
_refine_ls_number_restraints     24
_refine_ls_R_factor_all          0.0275
_refine_ls_R_factor_gt           0.0243
_refine_ls_wR_factor_ref         0.0565
_refine_ls_wR_factor_gt          0.0549
_refine_ls_goodness_of_fit_ref   1.131
_refine_ls_restrained_S_all      1.136
_refine_ls_shift/su_max          0.001
_refine_ls_shift/su_mean         0.000

loop_
_atom_site_label
_atom_site_type_symbol
_atom_site_fract_x
_atom_site_fract_y
_atom_site_fract_z
_atom_site_U_iso_or_equiv
_atom_site_adp_type
_atom_site_occupancy
_atom_site_site_symmetry_order
_atom_site_calc_flag
_atom_site_refinement_flags_posn
_atom_site_refinement_flags_adp
_atom_site_refinement_flags_occupancy
_atom_site_disorder_assembly
_atom_site_disorder_group
Mo1 Mo 0.52016(2) 0.29453(2) 0.27868(2) 0.01832(9) Uani 1 1 d . . . . .
Mo2 Mo 0.42979(2) 0.31442(2) 0.19747(2) 0.01631(8) Uani 1 1 d . . . . .
Mo3 Mo 0.42067(2) 0.30635(2) 0.10128(2) 0.01575(8) Uani 1 1 d . . . . .
O1 O 0.53072(16) 0.30564(16) 0.34068(14) 0.0269(8) Uani 1 1 d . . . . .
N1N N 0.2826(2) 0.2272(3) 0.1061(4) 0.065(2) Uani 1 1 d . . . . .
O2 O 0.36972(14) 0.31157(15) 0.21841(14) 0.0233(7) Uani 1 1 d . . . . .
O3 O 0.35755(14) 0.30466(16) 0.09580(14) 0.0247(8) Uani 1 1 d . . . . .
O4 O 0.45024(13) 0.27242(14) 0.26589(13) 0.0189(7) Uani 1 1 d . . . . .
O4W O 0.3092(10) 0.3092(10) 0.3092(10) 0.070(10) Uani 0.375 3 d S T P A 2
O5 O 0.50822(13) 0.31116(13) 0.20355(12) 0.0164(6) Uani 1 1 d . . . . .
O5W O 0.1851(7) 0.2333(5) 0.1747(6) 0.078(4) Uani 0.5 1 d . U P B 1
O6 O 0.43031(14) 0.36474(14) 0.14561(14) 0.0211(7) Uani 1 1 d . . . . .
O6W O 0.1978(5) 0.1978(5) 0.1978(5) 0.082(5) Uani 0.75 3 d S T P C 2
O7 O 0.43537(13) 0.25553(12) 0.15252(13) 0.0169(6) Uani 1 1 d . . . . .
O7W O 0.2636(11) 0.3299(10) 0.0166(8) 0.054(6) Uani 0.25 1 d . . P D 2
O8W O 0.3812(13) 0.3255(14) 0.3418(13) 0.053(8) Uani 0.1667 1 d . U P E 3
O9W O 0.2926(13) 0.3542(13) 0.0009(16) 0.070(8) Uani 0.25 1 d . U P F 3
O11W O 0.3330(8) 0.3330(8) 0.3330(8) 0.088(12) Uani 0.375 3 d S T P G 1
O12W O 0.3724(16) 0.3724(16) 0.3724(16) 0.091(7) Uani 0.25 3 d S T P H 2
O1W O 0.3576(14) 0.3735(15) 0.4013(13) 0.091(7) Uani 0.25 1 d . U P . 1
N11 N 0.48700(19) 0.36972(18) 0.27968(17) 0.0253(9) Uani 1 1 d . . . . .
N12 N 0.44767(19) 0.37770(17) 0.24754(17) 0.0250(9) Uani 1 1 d . . . . .
N14 N 0.4603(3) 0.4472(2) 0.2927(3) 0.059(2) Uani 1 1 d . . . . .
N21 N 0.59328(17) 0.32281(17) 0.25945(17) 0.0226(9) Uani 1 1 d . . . . .
N22 N 0.60964(18) 0.32484(18) 0.21058(17) 0.0249(9) Uani 1 1 d . . . . .
N24 N 0.6743(2) 0.3430(3) 0.2603(2) 0.0455(15) Uani 1 1 d . . . . .
C13 C 0.4329(3) 0.4246(2) 0.2566(2) 0.0386(16) Uani 1 1 d . . . . .
H13 H 0.4058 0.4404 0.2395 0.046 Uiso 1 1 calc R U . . .
C15 C 0.4931(3) 0.4114(2) 0.3055(3) 0.0443(18) Uani 1 1 d . . . . .
H15 H 0.5181 0.4156 0.3305 0.053 Uiso 1 1 calc R U . . .
C23 C 0.6576(2) 0.3372(3) 0.2130(2) 0.0359(14) Uani 1 1 d . . . . .
H23 H 0.6783 0.3416 0.1842 0.043 Uiso 1 1 calc R U . . .
C25 C 0.6331(2) 0.3343(3) 0.2875(2) 0.0344(13) Uani 1 1 d . . . . .
H25 H 0.6322 0.3362 0.3232 0.041 Uiso 1 1 calc R U . . .
O2W O 0.2747(5) 0.2747(5) 0.2747(5) 0.080(5) Uani 0.75 3 d S T P I 3
O3W O 0.2786(10) 0.3661(12) 0.0332(12) 0.059(7) Uani 0.25 1 d . . P J 1

loop_
_atom_site_aniso_label
_atom_site_aniso_U_11
_atom_site_aniso_U_22
_atom_site_aniso_U_33
_atom_site_aniso_U_23
_atom_site_aniso_U_13
_atom_site_aniso_U_12
Mo1 0.0226(2) 0.01915(19) 0.01323(18) -0.00177(15) -0.00309(14) 0.00510(16)
Mo2 0.01718(18) 0.01731(18) 0.01444(17) -0.00055(14) -0.00029(14) 0.00480(14)
Mo3 0.01599(18) 0.01714(18) 0.01412(17) 0.00140(14) -0.00070(14) 0.00233(14)
O1 0.031(2) 0.031(2) 0.0181(17) -0.0008(15) -0.0052(15) 0.0092(17)
N1N 0.023(3) 0.069(5) 0.102(6) -0.039(5) -0.004(3) 0.001(3)
O2 0.0214(17) 0.0294(19) 0.0189(17) 0.0007(15) 0.0019(14) 0.0075(15)
O3 0.0196(17) 0.031(2) 0.0238(18) 0.0000(16) -0.0008(14) 0.0060(15)
O4 0.0208(17) 0.0202(16) 0.0157(15) -0.0002(13) 0.0018(13) 0.0038(14)
O4W 0.070(10) 0.070(10) 0.070(10) 0.036(13) 0.036(13) 0.036(13)
O5 0.0181(15) 0.0186(16) 0.0124(14) -0.0004(13) -0.0008(12) 0.0016(13)
O5W 0.114(9) 0.049(6) 0.073(7) 0.030(6) 0.015(7) 0.023(6)
O6 0.0252(18) 0.0202(17) 0.0179(16) 0.0015(14) -0.0017(14) 0.0044(14)
O6W 0.082(5) 0.082(5) 0.082(5) 0.016(6) 0.016(6) 0.016(6)
O7 0.0203(16) 0.0153(15) 0.0153(15) -0.0017(12) -0.0001(13) 0.0029(13)
O7W 0.071(17) 0.063(15) 0.029(10) 0.007(10) -0.003(10) 0.016(13)
O8W 0.047(11) 0.064(12) 0.050(12) -0.001(10) 0.009(9) -0.004(10)
O9W 0.071(12) 0.067(12) 0.073(12) -0.009(10) 0.000(10) 0.008(9)
O11W 0.088(12) 0.088(12) 0.088(12) -0.021(11) -0.021(11) -0.021(11)
O12W 0.091(7) 0.091(7) 0.091(7) 0.004(6) 0.004(6) 0.004(6)
O1W 0.091(7) 0.091(7) 0.091(7) 0.004(6) 0.004(6) 0.004(6)
N11 0.033(2) 0.023(2) 0.020(2) -0.0057(18) -0.0069(19) 0.0086(18)
N12 0.031(2) 0.023(2) 0.021(2) -0.0055(17) -0.0053(18) 0.0115(19)
N14 0.085(5) 0.031(3) 0.062(4) -0.026(3) -0.041(4) 0.026(3)
N21 0.024(2) 0.024(2) 0.020(2) -0.0011(17) -0.0086(17) -0.0010(18)
N22 0.026(2) 0.028(2) 0.020(2) -0.0038(17) -0.0045(18) -0.0018(18)
N24 0.031(3) 0.074(5) 0.031(3) -0.001(3) -0.010(2) -0.009(3)
C13 0.052(4) 0.026(3) 0.038(3) -0.008(2) -0.018(3) 0.020(3)
C15 0.066(5) 0.026(3) 0.041(4) -0.014(3) -0.023(3) 0.016(3)
C23 0.026(3) 0.053(4) 0.029(3) -0.003(3) -0.007(2) -0.009(3)
C25 0.032(3) 0.046(4) 0.025(3) -0.006(3) -0.010(2) -0.004(3)
O2W 0.080(5) 0.080(5) 0.080(5) 0.014(7) 0.014(7) 0.014(7)
O3W 0.043(13) 0.066(17) 0.068(17) 0.029(14) -0.036(13) -0.018(12)

_geom_special_details            
;
 All esds (except the esd in the dihedral angle between two l.s. planes)
 are estimated using the full covariance matrix.  The cell esds are taken
 into account individually in the estimation of esds in distances, angles
 and torsion angles; correlations between esds in cell parameters are only
 used when they are defined by crystal symmetry.  An approximate (isotropic)
 treatment of cell esds is used for estimating esds involving l.s. planes.
;

loop_
_geom_bond_atom_site_label_1
_geom_bond_atom_site_label_2
_geom_bond_distance
_geom_bond_site_symmetry_2
_geom_bond_publ_flag
Mo1 O1 1.700(4) . ?
Mo1 O4 1.977(4) 3_655 ?
Mo1 O4 1.981(4) . ?
Mo1 O5 2.072(3) . ?
Mo1 N21 2.148(5) . ?
Mo1 N11 2.187(5) . ?
Mo1 Mo1 2.6014(9) 3_655 ?
Mo2 O2 1.694(4) . ?
Mo2 O6 1.923(4) . ?
Mo2 O7 1.977(3) . ?
Mo2 O5 2.095(3) . ?
Mo2 N12 2.199(5) . ?
Mo2 O4 2.205(3) . ?
Mo2 Mo3 2.5803(6) . ?
Mo3 O3 1.686(4) . ?
Mo3 O7 1.960(3) . ?
Mo3 O6 1.968(4) . ?
Mo3 O5 2.001(3) 28_544 ?
Mo3 N22 2.176(5) 28_544 ?
Mo3 O7 2.271(3) 2 ?
O4 Mo1 1.978(4) 3_655 ?
O5 Mo3 2.001(3) 2 ?
O7 Mo3 2.271(3) 28_544 ?
O7W O7W 1.15(5) 9 ?
O1W O1W 1.44(6) 12 ?
O1W O1W 1.44(6) 11 ?
N11 C15 1.315(8) . ?
N11 N12 1.368(6) . ?
N12 C13 1.330(7) . ?
N14 C15 1.335(9) . ?
N14 C13 1.349(9) . ?
N21 C25 1.332(7) . ?
N21 N22 1.372(6) . ?
N22 C23 1.320(8) . ?
N22 Mo3 2.176(5) 2 ?
N24 C25 1.335(9) . ?
N24 C23 1.343(8) . ?
O3W O3W 1.72(3) 10 ?
O3W O3W 1.72(3) 32_454 ?

loop_
_geom_angle_atom_site_label_1
_geom_angle_atom_site_label_2
_geom_angle_atom_site_label_3
_geom_angle
_geom_angle_site_symmetry_1
_geom_angle_site_symmetry_3
_geom_angle_publ_flag
O1 Mo1 O4 104.95(17) . 3_655 ?
O1 Mo1 O4 111.94(18) . . ?
O4 Mo1 O4 94.42(14) 3_655 . ?
O1 Mo1 O5 157.63(17) . . ?
O4 Mo1 O5 95.02(14) 3_655 . ?
O4 Mo1 O5 75.74(14) . . ?
O1 Mo1 N21 91.18(19) . . ?
O4 Mo1 N21 85.06(16) 3_655 . ?
O4 Mo1 N21 156.06(15) . . ?
O5 Mo1 N21 80.46(15) . . ?
O1 Mo1 N11 84.01(18) . . ?
O4 Mo1 N11 170.79(16) 3_655 . ?
O4 Mo1 N11 83.96(17) . . ?
O5 Mo1 N11 75.78(15) . . ?
N21 Mo1 N11 92.74(19) . . ?
O1 Mo1 Mo1 103.10(15) . 3_655 ?
O4 Mo1 Mo1 48.97(11) 3_655 3_655 ?
O4 Mo1 Mo1 48.86(10) . 3_655 ?
O5 Mo1 Mo1 97.55(10) . 3_655 ?
N21 Mo1 Mo1 133.85(12) . 3_655 ?
N11 Mo1 Mo1 131.84(14) . 3_655 ?
O2 Mo2 O6 105.90(17) . . ?
O2 Mo2 O7 103.55(17) . . ?
O6 Mo2 O7 96.73(15) . . ?
O2 Mo2 O5 155.85(16) . . ?
O6 Mo2 O5 94.42(15) . . ?
O7 Mo2 O5 86.51(14) . . ?
O2 Mo2 N12 92.25(19) . . ?
O6 Mo2 N12 84.27(17) . . ?
O7 Mo2 N12 163.17(16) . . ?
O5 Mo2 N12 76.67(16) . . ?
O2 Mo2 O4 86.48(16) . . ?
O6 Mo2 O4 160.73(15) . . ?
O7 Mo2 O4 94.55(14) . . ?
O5 Mo2 O4 70.69(13) . . ?
N12 Mo2 O4 80.47(15) . . ?
O2 Mo2 Mo3 103.52(13) . . ?
O6 Mo2 Mo3 49.20(11) . . ?
O7 Mo2 Mo3 48.76(10) . . ?
O5 Mo2 Mo3 99.61(9) . . ?
N12 Mo2 Mo3 133.24(13) . . ?
O4 Mo2 Mo3 143.16(9) . . ?
O3 Mo3 O7 103.92(17) . . ?
O3 Mo3 O6 101.70(18) . . ?
O7 Mo3 O6 95.84(14) . . ?
O3 Mo3 O5 99.24(17) . 28_544 ?
O7 Mo3 O5 90.99(14) . 28_544 ?
O6 Mo3 O5 155.67(15) . 28_544 ?
O3 Mo3 N22 90.38(19) . 28_544 ?
O7 Mo3 N22 164.80(17) . 28_544 ?
O6 Mo3 N22 86.08(16) . 28_544 ?
O5 Mo3 N22 81.51(16) 28_544 28_544 ?
O3 Mo3 O7 171.48(16) . 2 ?
O7 Mo3 O7 84.22(18) . 2 ?
O6 Mo3 O7 79.65(14) . 2 ?
O5 Mo3 O7 77.84(13) 28_544 2 ?
N22 Mo3 O7 81.29(16) 28_544 2 ?
O3 Mo3 Mo2 100.47(13) . . ?
O7 Mo3 Mo2 49.34(10) . . ?
O6 Mo3 Mo2 47.72(11) . . ?
O5 Mo3 Mo2 138.94(10) 28_544 . ?
N22 Mo3 Mo2 133.71(13) 28_544 . ?
O7 Mo3 Mo2 86.70(9) 2 . ?
Mo1 O4 Mo1 82.17(14) 3_655 . ?
Mo1 O4 Mo2 134.20(17) 3_655 . ?
Mo1 O4 Mo2 102.90(15) . . ?
Mo3 O5 Mo1 131.07(17) 2 . ?
Mo3 O5 Mo2 124.85(16) 2 . ?
Mo1 O5 Mo2 103.66(15) . . ?
Mo2 O6 Mo3 83.08(14) . . ?
Mo3 O7 Mo2 81.90(13) . . ?
Mo3 O7 Mo3 132.42(17) . 28_544 ?
Mo2 O7 Mo3 145.31(18) . 28_544 ?
O1W O1W O1W 60.000(7) 12 11 ?
C15 N11 N12 106.8(5) . . ?
C15 N11 Mo1 136.8(4) . . ?
N12 N11 Mo1 116.3(3) . . ?
C13 N12 N11 105.0(5) . . ?
C13 N12 Mo2 139.8(4) . . ?
N11 N12 Mo2 115.2(3) . . ?
C15 N14 C13 102.5(6) . . ?
C25 N21 N22 105.7(5) . . ?
C25 N21 Mo1 131.8(4) . . ?
N22 N21 Mo1 121.8(3) . . ?
C23 N22 N21 105.7(5) . . ?
C23 N22 Mo3 130.8(4) . 2 ?
N21 N22 Mo3 120.8(3) . 2 ?
C25 N24 C23 102.5(5) . . ?
N12 C13 N14 112.8(6) . . ?
N11 C15 N14 112.9(6) . . ?
N22 C23 N24 113.2(6) . . ?
N21 C25 N24 112.9(6) . . ?
O3W O3W O3W 85.7(12) 10 32_454 ?

_refine_diff_density_max         0.640
_refine_diff_density_min         -0.506
_refine_diff_density_rms         0.092

_shelx_res_file                  
;

    D:\Job\SHESTO~1\202012~2\S2_1_E~1\jul167-4.res created by SHELXL-2014/7

REM
TITL 111 in I-43d
CELL 0.71073 26.6106 26.6106 26.6106 90.000 90.000 90.000
ZERR 12.0000 0.0004 0.0004 0.0004 0.000 0.000 0.000
LATT -2
SYMM 0.25+Y, 0.75-X, 0.25-Z
SYMM -X, 0.5-Y, Z
SYMM 0.25-Y, 0.25+X, 0.75-Z
SYMM 0.25-X, 0.25+Z, 0.75-Y
SYMM X, -Y, 0.5-Z
SYMM 0.75-X, 0.25-Z, 0.25+Y
SYMM 0.75-Z, 0.25-Y, 0.25+X
SYMM 0.5-X, Y, -Z
SYMM 0.25+Z, 0.75-Y, 0.25-X
SYMM Z, X, Y
SYMM Y, Z, X
SYMM -Y, 0.5-Z, X
SYMM Z, -X, 0.5-Y
SYMM 0.5-Y, Z, -X
SYMM -Z, 0.5-X, Y
SYMM 0.5-Z, X, -Y
SYMM Y, -Z, 0.5-X
SYMM 0.75-Y, 0.25-X, 0.25+Z
SYMM 0.25+Y, 0.25+X, 0.25+Z
SYMM 0.25+X, 0.75-Z, 0.25-Y
SYMM 0.25+X, 0.25+Z, 0.25+Y
SYMM 0.25-Z, 0.25+Y, 0.75-X
SYMM 0.25+Z, 0.25+Y, 0.25+X
SFAC MO O N C H
UNIT 144 456 336 192 624
MERG 2
OMIT 0 180
FMAP 2
GRID
PLAN 5
TEMP -123
SIZE 0.082 0.083 0.114
OMIT     0 4 6
OMIT     -2 3 3
OMIT     2 3 3
OMIT     0 2 4
OMIT   -1 1 2
OMIT   1 1 2
TWIN
ISOR 0.008 0.008 O8W O9W O1W O5W
EADP O1W O12W
L.S. 14
ACTA 50.5
WGHT    0.023000   64.249901
BASF  -0.05276
FVAR       0.04442
MO1   1    0.520160    0.294526    0.278677    11.00000    0.02259    0.01915 =
         0.01323   -0.00177   -0.00309    0.00510
MO2   1    0.429789    0.314422    0.197472    11.00000    0.01718    0.01731 =
         0.01444   -0.00055   -0.00029    0.00480
MO3   1    0.420667    0.306350    0.101276    11.00000    0.01599    0.01714 =
         0.01412    0.00140   -0.00070    0.00233
O1    2    0.530717    0.305643    0.340682    11.00000    0.03130    0.03124 =
         0.01810   -0.00076   -0.00521    0.00925
N1N   3    0.282629    0.227242    0.106102    11.00000    0.02253    0.06938 =
         0.10242   -0.03944   -0.00411    0.00140
O2    2    0.369725    0.311574    0.218407    11.00000    0.02142    0.02943 =
         0.01893    0.00072    0.00187    0.00749
O3    2    0.357552    0.304661    0.095796    11.00000    0.01964    0.03055 =
         0.02384    0.00003   -0.00081    0.00598
O4    2    0.450240    0.272423    0.265889    11.00000    0.02085    0.02019 =
         0.01571   -0.00017    0.00178    0.00380
PART 2
O4W   2    0.309192    0.309192    0.309192    10.12500    0.07014    0.07014 =
         0.07014    0.03611    0.03611    0.03611
PART 0
O5    2    0.508218    0.311163    0.203550    11.00000    0.01811    0.01859 =
         0.01238   -0.00039   -0.00083    0.00158
PART 1
O5W   2    0.185090    0.233285    0.174689    10.50000    0.11365    0.04868 =
         0.07255    0.03015    0.01535    0.02340
PART 0
O6    2    0.430309    0.364742    0.145605    11.00000    0.02525    0.02025 =
         0.01794    0.00148   -0.00165    0.00443
PART 2
O6W   2    0.197763    0.197763    0.197763    10.25000    0.08171    0.08171 =
         0.08171    0.01557    0.01557    0.01557
PART 0
O7    2    0.435371    0.255530    0.152517    11.00000    0.02028    0.01526 =
         0.01526   -0.00166   -0.00007    0.00294
PART 2
O7W   2    0.263648    0.329912    0.016650    10.25000    0.07102    0.06279 =
         0.02926    0.00665   -0.00306    0.01600
PART 3
O8W   2    0.381224    0.325462    0.341833    10.16667    0.04666    0.06401 =
         0.04983   -0.00062    0.00885   -0.00408
O9W   2    0.292607    0.354248    0.000860    10.25000    0.07064    0.06722 =
         0.07259   -0.00891    0.00022    0.00848
PART 1
O11W  2    0.333013    0.333013    0.333013    10.12500    0.08753    0.08753 =
         0.08753   -0.02147   -0.02147   -0.02147
PART 2
O12W  2    0.372446    0.372446    0.372446    10.08333    0.09113    0.09113 =
         0.09113    0.00370    0.00370    0.00370
PART 1
O1W   2    0.357619    0.373548    0.401349    10.25000    0.09113    0.09113 =
         0.09113    0.00370    0.00370    0.00370
PART 0
N11   3    0.486998    0.369718    0.279675    11.00000    0.03336    0.02261 =
         0.01983   -0.00575   -0.00685    0.00856
N12   3    0.447672    0.377699    0.247538    11.00000    0.03145    0.02270 =
         0.02075   -0.00553   -0.00530    0.01146
N14   3    0.460340    0.447220    0.292735    11.00000    0.08469    0.03115 =
         0.06221   -0.02598   -0.04063    0.02577
N21   3    0.593276    0.322812    0.259451    11.00000    0.02391    0.02374 =
         0.02024   -0.00109   -0.00862   -0.00100
N22   3    0.609642    0.324843    0.210582    11.00000    0.02587    0.02847 =
         0.02040   -0.00377   -0.00445   -0.00178
N24   3    0.674300    0.342993    0.260325    11.00000    0.03086    0.07405 =
         0.03148   -0.00131   -0.01010   -0.00923
C13   4    0.432856    0.424578    0.256630    11.00000    0.05172    0.02643 =
         0.03774   -0.00841   -0.01844    0.02032
AFIX  43
H13   5    0.405817    0.440420    0.239529    11.00000   -1.20000
AFIX   0
C15   4    0.493078    0.411410    0.305466    11.00000    0.06595    0.02584 =
         0.04125   -0.01390   -0.02255    0.01570
AFIX  43
H15   5    0.518144    0.415613    0.330536    11.00000   -1.20000
AFIX   0
C23   4    0.657616    0.337214    0.213027    11.00000    0.02625    0.05302 =
         0.02851   -0.00286   -0.00734   -0.00888
AFIX  43
H23   5    0.678268    0.341591    0.184238    11.00000   -1.20000
AFIX   0
C25   4    0.633053    0.334334    0.287538    11.00000    0.03231    0.04559 =
         0.02535   -0.00633   -0.01024   -0.00382
AFIX  43
H25   5    0.632173    0.336196    0.323178    11.00000   -1.20000
PART 3
AFIX   0
O2W   2    0.274676    0.274676    0.274676    10.25000    0.07978    0.07978 =
         0.07978    0.01387    0.01387    0.01387
PART 1
O3W   2    0.278603    0.366143    0.033197    10.25000    0.04292    0.06628 =
         0.06778    0.02908   -0.03559   -0.01790
HKLF 4

REM  111 in I-43d
REM R1 =  0.0243 for    4537 Fo > 4sig(Fo)  and  0.0275 for all    4789 data
REM    254 parameters refined using     24 restraints

END

WGHT      0.0229     64.4569

REM Highest difference peak  0.640,  deepest hole -0.506,  1-sigma level  0.092
Q1    1   0.1999  0.2391  0.2102  11.00000  0.05    0.64
Q2    1   0.2798  0.2507  0.0881  11.00000  0.05    0.52
Q3    1   0.2571  0.2216  0.0788  11.00000  0.05    0.51
Q4    1   0.1573  0.2198  0.1694  11.00000  0.05    0.49
Q5    1   0.2164  0.2330  0.1876  11.00000  0.05    0.48
;
_shelx_res_checksum              10317

_shelx_hkl_file                  
;
  -2  -2   0 3326.25  160.15
   2   2   0 2873.60  158.21
   2   2   0 2958.54  145.79
   2   2   0 3096.74  139.89
  -3  -3   0    0.07    1.33
  -3  -3   0    1.63    1.77
  -3  -3   0    0.30    1.96
   3   3   0    3.39    1.78
   3   3   0   -0.75    1.97
   3   3   0    3.40    2.27
  -4  -4   0  745.66   32.83
  -4  -4   0  712.39   31.06
  -4  -4   0  716.86   30.01
   4   4   0  737.32   33.36
   4   4   0  758.22   32.05
   4   4   0  731.37   30.72
  -5  -5   0    0.73    2.61
  -5  -5   0    0.10    3.36
  -5  -5   0    0.16    1.94
   5   5   0    0.93    2.02
   5   5   0    1.02    2.98
   5   5   0    0.06    2.27
  -6  -6   0  341.57   17.48
  -6  -6   0  341.26   18.97
  -6  -6   0  307.25   20.16
   6   6   0  352.53   19.58
   6   6   0  334.80   17.83
   6   6   0  333.24   20.94
  -7  -7   0    0.68    2.88
  -7  -7   0    0.36    2.18
  -7  -7   0   -0.91    3.16
   7   7   0    2.60    3.46
   7   7   0   -0.23    2.50
  -8  -8   0  675.56   35.42
  -8  -8   0  644.33   30.65
  -8  -8   0  615.05   32.20
   8   8   0  651.55   32.47
   8   8   0  605.27   29.77
   8   8   0  585.28   33.77
  -9  -9   0    3.46    2.70
  -9  -9   0    0.07    3.55
  -9  -9   0    1.72    3.55
   9   9   0   -4.47    1.93
   9   9   0    1.91    4.25
   9   9   0    2.90    5.06
 -10 -10   0 3151.96  126.02
 -10 -10   0 3284.61  129.23
 -10 -10   0 3260.22  133.01
  10  10   0 3331.86  128.89
  10  10   0 3235.83  135.65
  10  10   0 3294.41  132.28
 -11 -11   0    0.87    4.07
 -11 -11   0   -3.64    2.38
 -11 -11   0    2.92    3.43
  11  11   0   -6.01    2.85
  11  11   0   -0.10    3.97
  11  11   0    4.64    3.49
 -12 -12   0   -1.72    3.18
 -12 -12   0    1.87    3.47
  12  12   0    4.55    3.80
  12  12   0    0.78    5.25
  12  12   0   -0.82    3.63
 -13 -13   0    8.40    5.93
 -13 -13   0   -1.94    2.71
  13  13   0    2.09    4.69
  13  13   0    2.26    3.60
  13  13   0   -2.56    2.97
 -14 -14   0  163.09   15.44
 -14 -14   0  163.65   19.79
  14  14   0  161.59   20.12
  14  14   0  156.72   17.93
  14  14   0  159.87   15.55
 -15 -15   0   -1.68    4.80
 -15 -15   0    3.58    4.58
  15  15   0    1.91    4.13
  15  15   0    6.18    6.14
  15  15   0   -3.01    4.52
 -16 -16   0  462.82   36.55
  16  16   0  504.20   32.09
 -17 -17   0   -3.45    5.56
  17  17   0    9.30    8.15
  17  17   0    2.22    4.68
 -18 -18   0    8.08    8.92
  18  18   0   11.76    6.88
  18  18   0   -4.62    4.67
 -19 -19   0    4.68    7.41
  19  19   0   -1.04    6.37
  19  19   0   -7.09    3.67
 -20 -20   0  419.49   38.67
  20  20   0  437.14   37.62
  20  20   0  455.35   32.87
 -21 -21   0    0.24    6.80
  21  21   0    2.87    5.41
  21  21   0    1.24    7.04
 -22 -22   0   66.89   18.90
  22  22   0   76.30   19.34
 -23 -23   0   -1.88    8.07
  23  23   0   -2.88    6.41
  23  23   0    6.10    6.69
 -24 -24   0   44.30   17.90
  24  24   0   40.31   11.74
  24  24   0   64.11   19.79
 -25 -25   0   -8.92    7.58
  25  25   0   -1.29    7.67
  25  25   0   -3.42    6.27
 -26 -26   0  108.71   39.62
  26  26   0   53.88   18.68
  26  26   0   46.83   14.56
  26  27   1   89.09   23.45
  26  27   1   41.26   13.29
  25  26   1  112.62   24.97
  25  26   1   85.87   17.67
 -25 -26  -1  104.39   26.56
  24  25   1   81.72   20.87
  24  25   1   30.40   11.03
 -24 -25  -1   51.75   18.61
  23  24   1   55.93   18.56
  23  24   1   69.16   15.20
 -23 -24  -1   80.00   21.98
  22  23   1   87.84   17.09
  22  23   1   76.14   19.84
 -22 -23  -1   87.34   21.60
  21  22   1   75.58   19.44
  21  22   1   80.77   15.52
 -21 -22  -1  103.55   23.86
  20  21   1   83.20   19.04
  20  21   1   81.86   15.15
 -20 -21  -1  121.74   24.47
  19  20   1  113.25   15.17
  19  20   1   67.11   17.29
 -19 -20  -1   99.55   22.02
  18  19   1  206.39   24.49
  18  19   1  204.79   20.00
 -18 -19  -1  228.68   49.93
  17  18   1  312.42   28.60
  17  18   1  268.17   22.72
 -17 -18  -1  299.16   30.61
  16  17   1   50.59   13.09
  16  17   1   56.82   11.38
 -16 -17  -1   53.40   14.04
  15  16   1   20.45    8.77
  15  16   1   21.59    7.44
 -15 -16  -1   27.98   10.93
 -15 -16  -1   18.51    6.90
  14  15   1  342.65   29.81
  14  15   1  286.72   21.42
  14  15   1  292.05   25.22
 -14 -15  -1  280.32   20.83
 -14 -15  -1  294.42   27.31
  13  14   1   12.03    5.25
  13  14   1   -2.02    3.72
  13  14   1   23.03   10.11
 -13 -14  -1   15.57    7.57
  12  13   1   34.52   10.74
  12  13   1   48.59    9.02
  12  13   1   13.78    6.40
 -12 -13  -1   29.78    7.00
 -12 -13  -1   26.18    9.39
  11  12   1 1229.45   59.02
  11  12   1 1245.76   54.69
  11  12   1 1150.28   61.69
 -11 -12  -1 1152.32   51.24
 -11 -12  -1 1108.00   58.08
  10  11   1   37.31   10.25
  10  11   1   45.57    7.25
  10  11   1   31.62    7.80
 -10 -11  -1   45.67   17.88
 -10 -11  -1   30.95    6.67
 -10 -11  -1   25.57    7.03
   9  10   1  296.61   18.08
   9  10   1  292.91   20.75
   9  10   1  259.29   21.82
  -9 -10  -1  259.60   20.86
  -9 -10  -1  268.23   16.81
  -9 -10  -1  255.20   18.46
   8   9   1  109.92   13.12
   8   9   1   96.83    9.34
   8   9   1  108.82   11.33
  -8  -9  -1   93.39   10.03
  -8  -9  -1   85.55    8.46
  -8  -9  -1   91.87   11.78
   7   8   1  190.95   16.32
   7   8   1  192.70   12.79
   7   8   1  197.51   14.72
  -7  -8  -1  195.72   16.29
  -7  -8  -1  190.82   12.71
  -7  -8  -1  210.63   14.78
   6   7   1  677.49   32.41
   6   7   1  584.02   32.89
   6   7   1  665.18   29.20
  -6  -7  -1  642.51   33.61
  -6  -7  -1  665.89   29.46
  -6  -7  -1  660.30   31.52
   5   6   1  295.69   16.99
   5   6   1  265.87   17.98
   5   6   1  289.97   14.94
  -5  -6  -1  270.43   15.99
  -5  -6  -1  274.25   14.40
   4   5   1  166.39   10.99
   4   5   1  154.59    9.27
   4   5   1  152.87   11.98
  -4  -5  -1  167.64   12.17
  -4  -5  -1  146.67    9.06
  -4  -5  -1  159.43   10.59
   3   4   1   59.35    4.84
   3   4   1   61.47    6.03
   3   4   1   82.91    7.58
  -3  -4  -1   81.26    6.49
  -3  -4  -1   60.56    4.98
   2   3   1  401.84   15.70
   2   3   1  357.75   17.65
   2   3   1  356.87   16.75
  -2  -3  -1  382.22   15.97
  -2  -3  -1  403.33   17.41
  -2  -3  -1  375.92   18.14
   1   2   1 5672.21  224.54
   2   1  -1    0.69    1.00
  -3  -2   1  378.79   17.73
  -3  -2   1  400.29   18.66
  -3  -2   1  382.78   17.29
   3   2  -1  375.97   17.57
   3   2  -1  384.45   16.96
   3   2  -1  374.73   17.08
  -4  -3   1   66.01    5.90
  -4  -3   1   75.61    6.55
   4   3  -1   74.46    6.36
   4   3  -1   83.66    7.65
   4   3  -1   82.64    6.88
  -5  -4   1  144.09   10.39
  -5  -4   1  168.92   10.44
   5   4  -1  155.28   10.36
   5   4  -1  161.49   11.13
   5   4  -1  160.83   11.95
  -6  -5   1  260.59   16.01
  -6  -5   1  305.49   15.88
  -6  -5   1  257.14   17.10
   6   5  -1  275.62   16.24
   6   5  -1  251.95   14.99
  -7  -6   1  642.80   32.31
  -7  -6   1  627.00   29.36
  -7  -6   1  595.69   29.96
   7   6  -1  671.73   35.56
   7   6  -1  766.85   33.50
   7   6  -1  723.37   37.83
  -8  -7   1  172.73   13.57
  -8  -7   1  176.83   12.68
  -8  -7   1  171.99   15.07
   8   7  -1  229.95   15.93
   8   7  -1  212.53   14.49
   8   7  -1  193.01   16.41
  -9  -8   1   95.84   10.33
  -9  -8   1   82.68    8.95
  -9  -8   1   91.61   11.70
   9   8  -1   76.59    9.98
   9   8  -1  107.84   12.79
   9   8  -1  109.92   10.70
 -10  -9   1  278.59   21.28
 -10  -9   1  258.45   17.41
 -10  -9   1  257.62   18.72
  10   9  -1  247.46   19.09
  10   9  -1  256.34   21.02
  10   9  -1  273.67   18.09
 -11 -10   1   35.96    7.45
 -11 -10   1   33.10    8.28
 -11 -10   1   16.86    6.92
  11  10  -1   17.44    6.49
  11  10  -1   30.06    7.26
  11  10  -1   34.35    9.70
 -12 -11   1 1121.63   52.96
 -12 -11   1 1193.12   59.50
  12  11  -1 1240.08   56.51
  12  11  -1 1184.97   58.81
  12  11  -1 1258.55   62.87
 -13 -12   1   34.34   10.59
 -13 -12   1   31.43    7.56
  13  12  -1   28.97    8.09
  13  12  -1   29.12    9.15
  13  12  -1   29.61   10.24
 -14 -13   1   10.87    5.11
 -14 -13   1   12.14    7.18
  14  13  -1    9.66    7.21
  14  13  -1    3.19    4.19
  14  13  -1    7.92    5.64
 -15 -14   1  329.61   28.50
 -15 -14   1  298.31   22.64
  15  14  -1  339.06   24.00
  15  14  -1  332.06   26.79
  15  14  -1  249.50   26.33
 -16 -15   1   16.97    8.73
  16  15  -1   29.47    8.77
  16  15  -1   17.14    8.48
 -17 -16   1   61.95   15.94
  17  16  -1   64.26   15.27
  17  16  -1   58.30   12.02
 -18 -17   1  358.36   33.39
  18  17  -1  317.30   29.47
  18  17  -1  329.12   26.50
 -19 -18   1  178.29   28.86
  19  18  -1  211.99   24.19
  19  18  -1  190.90   20.36
 -20 -19   1   78.50   18.97
  20  19  -1   50.04   12.92
  20  19  -1   88.16   19.20
 -21 -20   1   57.44   17.21
  21  20  -1   76.63   15.56
  21  20  -1  143.01   21.55
 -22 -21   1   90.02   22.52
  22  21  -1  100.82   18.29
  22  21  -1   89.70   20.56
 -23 -22   1   40.06   15.14
  23  22  -1   84.58   17.46
  23  22  -1   63.10   18.14
 -24 -23   1   67.42   20.20
  24  23  -1   81.63   17.47
  24  23  -1  119.52   25.46
 -25 -24   1   46.20   18.59
  25  24  -1   53.49   17.96
  25  24  -1   43.90   14.46
 -26 -25   1  130.49   28.11
  26  25  -1   90.60   19.88
  26  25  -1  136.87   28.62
  27  26  -1   58.95   20.60
  27  26  -1   43.57   14.24
  25  27   2   14.06    9.40
  25  27   2   11.05   11.90
  24  26   2   66.91   20.55
  24  26   2   61.01   14.35
 -24 -26  -2   66.47   21.42
  23  25   2   42.20   17.05
 -23 -25  -2    8.92   18.01
  22  24   2   60.24   13.51
  22  24   2   24.02   12.68
 -22 -24  -2   40.88   16.74
  21  23   2  295.09   33.15
  21  23   2  338.01   27.13
 -21 -23  -2  279.59   33.11
  20  22   2  148.38   26.20
  20  22   2  152.21   18.06
 -20 -22  -2  126.47   25.47
  19  21   2   81.16   19.26
  19  21   2   81.72   14.78
 -19 -21  -2   65.79   17.84
  18  20   2   38.70    9.67
  18  20   2   67.42   17.19
 -18 -20  -2   51.20   15.54
  17  19   2   16.42    7.19
  17  19   2    8.16    8.41
 -17 -19  -2  -10.09    4.92
  16  18   2    2.04    4.56
  16  18   2    4.15    6.34
 -16 -18  -2    5.16    6.83
 -16 -18  -2   10.16    5.70
  15  17   2  175.59   16.74
  15  17   2  208.13   22.77
 -15 -17  -2  215.47   24.14
 -15 -17  -2  186.37   17.04
  14  16   2   61.44   15.19
  14  16   2   90.62   14.52
  14  16   2   70.26   10.20
 -14 -16  -2   61.12    9.69
 -14 -16  -2   78.63   16.81
  13  15   2  151.79   14.17
  13  15   2  113.89   17.55
  13  15   2  175.48   18.59
 -13 -15  -2  148.65   18.85
 -13 -15  -2  149.31   16.49
  12  14   2   40.12    8.03
  12  14   2   57.03   19.25
  12  14   2   53.56   11.76
 -12 -14  -2   40.38    8.21
 -12 -14  -2   64.38   13.47
  11  13   2 1633.96   68.83
  11  13   2 1583.33   77.91
  11  13   2 1597.56   74.24
 -11 -13  -2 1501.78   66.41
 -11 -13  -2 1660.89   76.62
  10  12   2  412.60   23.52
  10  12   2  445.76   30.88
  10  12   2  391.23   26.91
 -10 -12  -2  371.79   27.60
 -10 -12  -2  367.98   21.46
 -10 -12  -2  353.65   24.16
   9  11   2  193.82   19.67
   9  11   2  281.50   20.00
   9  11   2  247.05   16.01
  -9 -11  -2  265.85   16.54
  -9 -11  -2  231.47   18.18
  -9 -11  -2  268.23   21.89
   8  10   2  659.02   31.75
   8  10   2  678.06   38.50
   8  10   2  709.86   36.19
  -8 -10  -2  673.89   36.58
  -8 -10  -2  650.73   37.33
  -8 -10  -2  681.71   31.58
   7   9   2  376.86   23.23
   7   9   2  379.15   25.40
   7   9   2  406.12   20.54
  -7  -9  -2  418.16   23.64
  -7  -9  -2  384.72   25.43
  -7  -9  -2  398.60   20.62
   6   8   2  161.49   10.88
   6   8   2  161.26   14.57
   6   8   2  159.54   13.23
  -6  -8  -2  164.17   14.53
  -6  -8  -2  154.72   12.61
  -6  -8  -2  166.65   10.84
   5   7   2  976.74   45.30
   5   7   2  984.34   43.90
   5   7   2  957.05   39.82
  -5  -7  -2  898.91   40.44
  -5  -7  -2  937.22   37.84
  -5  -7  -2  889.34   42.63
   4   6   2  172.70   11.95
   4   6   2  161.19   12.90
   4   6   2  161.59    9.62
  -4  -6  -2  183.49   12.23
  -4  -6  -2  175.50   10.07
  -4  -6  -2  171.38   13.48
   3   5   2  589.58   26.62
   3   5   2  576.78   24.11
   3   5   2  577.83   27.89
  -3  -5  -2  548.22   23.05
  -3  -5  -2  532.17   25.13
  -3  -5  -2  583.15   27.05
   2   4   2  355.34   17.41
   2   4   2  371.46   18.50
   2   4   2  364.93   15.54
  -2  -4  -2  357.40   18.23
  -2  -4  -2  362.37   15.55
  -2  -4  -2  369.53   17.43
   1   3   2  374.67   15.63
   1   3   2  388.13   17.15
   1   3   2  377.91   15.55
   1   3   2  375.98   17.46
  -1  -3  -2  356.47   16.42
  -1  -3  -2  373.63   17.00
   0   2   2 3055.12  151.01
   0   2   2 3029.45  138.33
   0  -2  -2 3279.77  158.04
   0  -2  -2 3139.56  163.58
  -2   0   2 3007.79  153.08
  -2   0   2 3239.68  158.09
   2   0  -2 3196.32  137.55
   2   0  -2 2945.13  152.33
   2   0  -2 2994.75  154.27
  -3  -1   2  384.00   16.86
  -3  -1   2  389.76   17.42
  -3  -1   2  380.08   17.52
   3   1  -2  391.52   17.20
   3   1  -2  365.70   16.55
   3   1  -2  376.06   17.32
  -4  -2   2  346.94   17.39
  -4  -2   2  377.21   17.71
  -4  -2   2  368.11   17.60
   4   2  -2  345.56   17.36
   4   2  -2  370.41   17.62
   4   2  -2  356.20   17.40
  -5  -3   2  587.91   26.13
  -5  -3   2  525.05   24.95
  -5  -3   2  529.12   25.10
   5   3  -2  562.09   26.56
   5   3  -2  577.85   26.08
   5   3  -2  558.10   25.99
  -6  -4   2  166.44   11.52
  -6  -4   2  177.08   11.93
   6   4  -2  166.50   11.74
   6   4  -2  161.90   12.49
   6   4  -2  180.21   12.29
  -7  -5   2  967.50   42.98
  -7  -5   2 1024.39   44.81
  -7  -5   2  942.78   42.29
   7   5  -2  974.42   44.02
   7   5  -2  917.17   42.36
   7   5  -2  972.08   42.07
  -8  -6   2  161.64   12.79
  -8  -6   2  161.90   14.02
  -8  -6   2  152.10   11.96
   8   6  -2  155.30   12.28
   8   6  -2  167.46   14.78
   8   6  -2  141.81   12.43
  -9  -7   2  398.60   23.90
  -9  -7   2  435.13   26.20
  -9  -7   2  427.60   23.58
   9   7  -2  425.56   27.14
   9   7  -2  474.41   25.44
   9   7  -2  473.06   26.56
 -10  -8   2  643.49   33.46
 -10  -8   2  711.76   37.78
  10   8  -2  733.77   37.75
  10   8  -2  764.13   36.69
  10   8  -2  682.25   38.94
 -11  -9   2  277.17   19.98
 -11  -9   2  248.15   18.21
 -11  -9   2  299.17   22.45
  11   9  -2  280.18   20.71
  11   9  -2  283.40   22.51
  11   9  -2  273.77   19.42
 -12 -10   2  376.16   27.20
 -12 -10   2  361.71   26.49
 -12 -10   2  374.81   24.93
  12  10  -2  375.95   28.10
  12  10  -2  380.46   24.51
  12  10  -2  380.18   25.98
 -13 -11   2 1597.62   75.05
 -13 -11   2 1514.99   68.70
  13  11  -2 1611.85   73.02
  13  11  -2 1534.26   75.41
  13  11  -2 1529.40   69.68
 -14 -12   2   47.52    9.92
 -14 -12   2   35.12    9.76
  14  12  -2   48.14   12.03
  14  12  -2   44.65   11.21
  14  12  -2   47.00   10.17
 -15 -13   2  136.20   15.06
 -15 -13   2  168.77   19.63
  15  13  -2  116.51   14.36
  15  13  -2  150.44   17.54
  15  13  -2  134.26   18.55
 -16 -14   2   58.53   14.33
  16  14  -2   43.81   10.65
  16  14  -2   69.75   16.05
  16  14  -2   58.68   12.76
 -17 -15   2  214.23   24.17
  17  15  -2  215.11   20.53
  17  15  -2  249.54   37.32
 -18 -16   2    6.63    7.06
  18  16  -2    1.57    6.05
  18  16  -2   -3.89    4.62
 -19 -17   2   -2.03    5.48
  19  17  -2    1.87    6.00
  19  17  -2   16.84   10.06
 -20 -18   2   29.05   12.10
  20  18  -2   53.41   13.12
  20  18  -2   24.30   10.98
 -21 -19   2   73.86   18.43
  21  19  -2   81.34   18.71
  21  19  -2   93.11   17.16
 -22 -20   2  153.35   24.56
  22  20  -2  132.67   19.15
  22  20  -2  174.13   23.66
 -23 -21   2  330.57   36.14
  23  21  -2  343.21   30.90
  23  21  -2  372.96   35.96
 -24 -22   2   32.60   15.31
  24  22  -2   60.25   15.86
  24  22  -2   70.49   19.18
 -25 -23   2   17.24   12.60
  25  23  -2   18.84   10.23
  25  23  -2   34.89   14.02
 -26 -24   2  131.10   28.06
  26  24  -2   79.57   20.83
  26  24  -2   67.94   18.13
 -27 -25   2   19.18   16.74
  27  25  -2   11.36   11.17
  27  25  -2   14.84   10.77
  25  28   3    8.76    7.99
  25  28   3    5.67   10.90
  24  27   3    5.23    9.28
  24  27   3   19.51   11.09
 -24 -27  -3   10.52   11.10
  23  26   3   25.89   13.49
  23  26   3   50.58   13.04
 -23 -26  -3   37.59   16.35
  22  25   3   52.95   12.54
  22  25   3   69.29   32.31
 -22 -25  -3   34.45   16.78
  21  24   3  212.98   21.18
  21  24   3  224.54   29.22
 -21 -24  -3  175.12   27.78
  20  23   3   73.54   18.31
  20  23   3   59.89   13.09
 -20 -23  -3   75.80   18.88
  19  22   3   19.28   10.66
  19  22   3   51.31   11.35
 -19 -22  -3   50.48   16.05
  18  21   3   78.52   13.98
  18  21   3  121.08   22.91
 -18 -21  -3  102.77   23.34
  17  20   3  665.86   46.66
  17  20   3  676.68   38.65
 -17 -20  -3  640.65   48.47
  16  19   3  220.47   19.24
  16  19   3  246.11   25.28
 -16 -19  -3  184.96   17.35
 -16 -19  -3  181.49   24.26
  15  18   3   24.63   10.94
  15  18   3   11.82    6.11
 -15 -18  -3   19.24    9.43
 -15 -18  -3    3.56    4.27
  14  17   3   49.51    9.49
  14  17   3   30.12   10.67
 -14 -17  -3   14.70    9.16
 -14 -17  -3   20.56    6.39
  13  16   3  102.27   16.93
  13  16   3  111.40   15.94
  13  16   3  132.25   13.13
 -13 -16  -3  107.01   11.79
 -13 -16  -3   99.90   16.49
  12  15   3   85.88   17.25
  12  15   3   90.23   13.75
  12  15   3  103.09   11.07
 -12 -15  -3   91.60   10.50
 -12 -15  -3  116.95   16.31
  11  14   3  369.32   26.84
  11  14   3  361.58   22.00
  11  14   3  344.56   28.88
 -11 -14  -3  337.71   21.15
 -11 -14  -3  367.19   28.65
  10  13   3  118.56   15.74
  10  13   3  117.09   14.10
  10  13   3  119.32   10.94
 -10 -13  -3  129.99   16.32
 -10 -13  -3  100.74   10.04
   9  12   3  177.07   18.20
   9  12   3  162.95   12.50
   9  12   3  140.93   14.92
  -9 -12  -3  136.89   16.64
  -9 -12  -3  148.95   11.59
  -9 -12  -3  125.55   13.35
   8  11   3    0.14    3.52
   8  11   3    5.17    5.36
   8  11   3    4.26    3.14
  -8 -11  -3    4.21    2.91
  -8 -11  -3    8.84    4.85
  -8 -11  -3    4.66    5.09
   7  10   3  333.09   18.07
   7  10   3  310.38   23.22
   7  10   3  320.58   21.37
  -7 -10  -3  309.41   23.07
  -7 -10  -3  310.64   22.73
  -7 -10  -3  318.08   17.38
   6   9   3  572.84   31.20
   6   9   3  638.38   27.82
   6   9   3  591.37   33.52
  -6  -9  -3  602.81   33.22
  -6  -9  -3  616.82   30.86
  -6  -9  -3  575.18   27.03
   5   8   3   29.03    6.55
   5   8   3   27.53    4.55
   5   8   3   27.04    6.98
  -5  -8  -3   21.05    6.30
  -5  -8  -3   23.86    4.33
  -5  -8  -3   26.56    5.86
   4   7   3  651.87   31.57
   4   7   3  682.77   28.27
   4   7   3  641.18   33.06
  -4  -7  -3  639.80   27.87
  -4  -7  -3  696.42   33.35
  -4  -7  -3  650.42   31.03
   3   6   3 1522.00   62.25
   3   6   3 1542.58   58.96
   3   6   3 1549.36   63.75
  -3  -6  -3 1505.48   62.34
  -3  -6  -3 1598.92   64.34
   2   5   3  605.75   26.82
   2   5   3  598.24   27.63
   2   5   3  578.26   24.07
   2   5   3  558.36   23.92
  -2  -5  -3  577.74   27.47
  -2  -5  -3  602.75   26.94
   1   4   3   71.02    4.98
   1   4   3   62.06    6.36
  -1  -4  -3   68.71    6.48
  -1  -4  -3   60.71    5.95
  -1  -4  -3   75.12    5.10
   0   3   3   -0.03    1.26
   0   3   3   -1.75    1.57
   0   3   3    2.62    1.99
   0  -3  -3   -1.06    1.14
   0  -3  -3    0.12    1.81
   0  -3  -3   -1.10    1.37
  -1   2   3  371.33   16.93
  -1   2   3  372.81   16.49
   1  -2  -3  370.68   16.86
   1  -2  -3  409.13   17.54
   1  -2  -3  383.31   15.54
   1  -2  -3  377.90   15.81
  -2   1   3  368.65   14.83
  -2   1   3  392.69   17.15
  -2   1   3  367.60   17.11
   2  -1  -3  374.12   17.12
   2  -1  -3  364.99   16.86
   2  -1  -3  376.34   14.71
  -3   0   3    0.44    1.19
  -3   0   3   -0.44    1.86
  -3   0   3    1.64    1.83
   3   0  -3    1.74    1.97
   3   0  -3   -0.39    1.71
   3   0  -3    0.81    1.26
  -4  -1   3   67.05    6.35
  -4  -1   3   63.96    5.44
  -4  -1   3   73.02    6.84
  -4  -1   3   69.73    6.40
   4   1  -3   78.78    6.16
   4   1  -3   77.37    7.11
  -5  -2   3  566.56   26.20
  -5  -2   3  558.43   25.67
  -5  -2   3  584.77   26.55
   5   2  -3  564.79   25.60
   5   2  -3  551.25   25.90
   5   2  -3  533.92   25.01
  -6  -3   3 1515.56   61.37
  -6  -3   3 1501.04   61.33
  -6  -3   3 1513.19   61.37
   6   3  -3 1537.95   63.47
   6   3  -3 1595.00   63.51
   6   3  -3 1563.52   63.64
  -7  -4   3  628.13   31.24
  -7  -4   3  683.12   32.50
  -7  -4   3  701.80   32.08
   7   4  -3  661.18   31.60
   7   4  -3  633.66   31.97
   7   4  -3  687.38   31.89
  -8  -5   3   29.10    6.43
  -8  -5   3   39.95    7.12
  -8  -5   3   23.77    6.32
   8   5  -3   28.78    6.83
   8   5  -3   32.31    7.52
  -9  -6   3  617.41   30.81
  -9  -6   3  569.10   31.87
  -9  -6   3  610.04   31.08
   9   6  -3  606.46   32.98
   9   6  -3  603.69   31.54
 -10  -7   3  300.43   21.54
 -10  -7   3  316.49   20.54
 -10  -7   3  304.30   19.72
  10   7  -3  311.31   20.45
  10   7  -3  312.83   21.03
  10   7  -3  298.14   21.75
 -11  -8   3    7.89    5.46
 -11  -8   3   -0.91    2.56
 -11  -8   3    2.88    3.72
  11   8  -3    2.30    3.43
  11   8  -3    7.78    5.50
  11   8  -3    1.16    3.60
 -12  -9   3  155.28   14.82
 -12  -9   3  133.19   13.78
 -12  -9   3  153.95   16.22
  12   9  -3  140.33   14.72
  12   9  -3  123.50   15.23
  12   9  -3  151.48   14.59
 -13 -10   3  128.84   13.52
 -13 -10   3  130.28   15.60
  13  10  -3  122.77   14.50
  13  10  -3  136.74   14.14
  13  10  -3   80.64   13.16
 -14 -11   3  418.48   29.52
 -14 -11   3  294.72   22.56
  14  11  -3  341.02   25.11
  14  11  -3  383.66   27.47
  14  11  -3  393.95   29.76
 -15 -12   3   88.49   14.30
  15  12  -3  127.23   24.33
  15  12  -3  125.07   14.61
  15  12  -3  105.51   14.52
 -16 -13   3  146.19   19.06
  16  13  -3  104.53   14.08
  16  13  -3  120.53   16.09
  16  13  -3  106.68   17.02
 -17 -14   3   47.58   13.18
  17  14  -3   33.05    9.53
  17  14  -3   14.22    7.57
 -18 -15   3   12.31    8.95
  18  15  -3   10.61    7.07
  18  15  -3    4.54    6.38
 -19 -16   3  164.16   22.72
  19  16  -3  216.49   24.13
  19  16  -3  210.49   21.82
 -20 -17   3  654.43   49.45
  20  17  -3  666.06   42.71
  20  17  -3  629.51   44.83
 -21 -18   3   79.94   18.87
  21  18  -3   82.87   26.95
  21  18  -3   96.92   19.69
 -22 -19   3   18.21   10.83
  22  19  -3   13.55    8.60
  22  19  -3   49.42   14.47
 -23 -20   3   84.15   20.71
  23  20  -3  127.32   19.38
  23  20  -3   77.40   19.08
 -24 -21   3  227.19   30.56
  24  21  -3  170.33   22.71
  24  21  -3  186.07   26.18
 -25 -22   3   53.89   18.01
  25  22  -3  105.86   25.48
  25  22  -3   69.29   17.81
 -26 -23   3   40.75   16.78
  26  23  -3   33.03   15.32
  26  23  -3   33.81   13.18
 -27 -24   3   17.26   13.13
  27  24  -3   12.20   10.60
  27  24  -3    8.30    9.68
  28  25  -3    5.47    9.69
  28  25  -3    9.69   12.08
  24  28   4    3.02   11.21
  24  28   4   10.36    7.77
  23  27   4   18.61    9.06
  23  27   4    0.14    8.46
 -23 -27  -4   -6.04    7.34
  22  26   4   -5.87    5.72
  22  26   4    4.82    6.52
 -22 -26  -4    0.38   10.71
  21  25   4   68.14   19.15
  21  25   4   58.91   12.46
 -21 -25  -4   85.21   23.53
  20  24   4   21.08    8.57
  20  24   4   25.51   13.02
 -20 -24  -4   36.00   14.87
  19  23   4   95.96   14.10
  19  23   4  104.51   21.42
 -19 -23  -4   68.08   19.20
  18  22   4   25.90   11.81
  18  22   4   22.98    8.11
 -18 -22  -4   32.63   15.75
  17  21   4   30.26    8.80
  17  21   4   19.50   10.32
 -17 -21  -4   11.23   10.68
  16  20   4   95.19   19.96
  16  20   4   65.09   11.86
 -16 -20  -4   63.48   18.17
 -16 -20  -4   67.48   11.00
  15  19   4  155.41   15.28
  15  19   4  155.04   20.61
 -15 -19  -4  135.22   20.42
 -15 -19  -4  151.77   14.96
  14  18   4  123.11   13.13
  14  18   4  129.78   18.12
 -14 -18  -4  113.45   18.32
 -14 -18  -4   80.87   10.96
  13  17   4    2.75    5.65
  13  17   4    6.44    4.62
 -13 -17  -4    2.02    5.97
 -13 -17  -4    1.45    3.33
  12  16   4   54.03   13.01
  12  16   4   97.64   10.70
  12  16   4   82.27   16.61
 -12 -16  -4   73.36    9.62
 -12 -16  -4   74.62   15.54
  11  15   4    5.00    5.14
  11  15   4    4.37    6.16
  11  15   4   17.50    5.60
 -11 -15  -4   13.14    4.98
 -11 -15  -4   20.92    8.62
  10  14   4  289.84   25.64
  10  14   4  267.85   22.58
  10  14   4  301.46   18.60
 -10 -14  -4  302.02   18.83
 -10 -14  -4  284.55   25.02
   9  13   4  254.13   20.49
   9  13   4  230.60   15.40
   9  13   4  212.01   21.09
  -9 -13  -4  212.61   14.79
  -9 -13  -4  233.60   21.29
   8  12   4   18.67    6.53
   8  12   4   13.98    6.40
   8  12   4   26.08    5.46
  -8 -12  -4   25.88    8.41
  -8 -12  -4   23.23    5.19
  -8 -12  -4   24.43    6.97
   7  11   4   57.06    9.98
   7  11   4   72.16   12.92
   7  11   4   58.74    6.83
  -7 -11  -4   41.20    5.88
  -7 -11  -4   57.39   10.02
  -7 -11  -4   53.09   10.56
   6  10   4  259.80   14.85
   6  10   4  263.70   20.31
   6  10   4  247.22   18.34
  -6 -10  -4  235.66   14.15
  -6 -10  -4  229.51   19.10
  -6 -10  -4  279.44   18.21
   5   9   4  120.69   13.16
   5   9   4  117.37   11.71
   5   9   4  136.27    9.29
  -5  -9  -4  112.98    8.58
  -5  -9  -4  126.82   11.25
  -5  -9  -4  110.20   12.31
   4   8   4 2083.04   79.82
   4   8   4 2059.21   86.17
   4   8   4 2112.20   84.54
  -4  -8  -4 2034.44   83.04
  -4  -8  -4 1974.94   80.82
  -4  -8  -4 1993.57   76.84
   3   7   4  666.69   33.08
   3   7   4  667.30   28.26
   3   7   4  673.47   32.55
   3   7   4  668.34   28.32
  -3  -7  -4  663.51   31.47
  -3  -7  -4  663.01   32.72
   2   6   4  172.75    9.65
   2   6   4  165.25   11.72
   2   6   4  150.31   11.99
   2   6   4  154.43    9.26
  -2  -6  -4  186.46   12.59
  -2  -6  -4  193.26   13.35
   1   5   4  155.47   11.06
   1   5   4  165.91   11.16
  -1  -5  -4  163.12   11.05
  -1  -5  -4  162.98   10.89
  -1  -5  -4  152.91    8.99
   0   4   4  764.85   30.69
   0   4   4  736.05   31.25
   0   4   4  716.46   31.92
   0  -4  -4  720.02   31.64
   0  -4  -4  742.06   30.23
   0  -4  -4  743.93   31.10
  -1   3   4   68.56    6.43
  -1   3   4   73.08    6.00
   1  -3  -4   67.99    4.89
   1  -3  -4   62.97    6.13
   1  -3  -4   74.34    5.42
   1  -3  -4   65.22    5.75
  -2   2   4  367.78   17.74
  -2   2   4  384.27   18.11
  -2   2   4  366.74   15.12
   2  -2  -4  362.17   15.10
   2  -2  -4  371.70   17.86
   2  -2  -4  393.15   18.19
  -3   1   4   82.75    6.87
  -3   1   4   84.35    7.21
  -3   1   4   74.37    5.21
   3  -1  -4   76.31    6.98
   3  -1  -4   73.95    4.48
   3  -1  -4   66.53    6.30
  -4   0   4  730.67   32.17
  -4   0   4  745.90   29.37
  -4   0   4  713.41   31.61
   4   0  -4  717.60   31.72
   4   0  -4  734.87   29.45
   4   0  -4  744.19   32.40
  -5  -1   4  144.63   10.88
  -5  -1   4  160.57    9.76
  -5  -1   4  166.95   11.51
  -5  -1   4  176.57   11.44
   5   1  -4  149.92    9.59
   5   1  -4  158.73   11.46
  -6  -2   4  151.85   10.63
  -6  -2   4  148.78   11.48
  -6  -2   4  168.58   12.03
  -6  -2   4  174.24   11.97
   6   2  -4  192.25   12.16
   6   2  -4  170.86   12.83
   6   2  -4  180.41   12.45
  -7  -3   4  670.51   30.95
  -7  -3   4  645.28   31.34
  -7  -3   4  641.99   31.12
   7   3  -4  710.14   32.83
   7   3  -4  671.35   31.94
   7   3  -4  634.37   31.38
  -8  -4   4 2166.13   85.80
  -8  -4   4 2098.21   85.49
  -8  -4   4 2081.98   85.32
   8   4  -4 2029.67   82.13
   8   4  -4 2037.50   81.85
   8   4  -4 1961.19   81.86
  -9  -5   4  134.75   11.95
  -9  -5   4  140.07   12.26
  -9  -5   4  106.25   11.51
   9   5  -4  126.25   11.75
   9   5  -4   99.90   10.80
   9   5  -4  128.23   12.42
 -10  -6   4  279.78   19.90
 -10  -6   4  253.96   18.29
 -10  -6   4  275.81   18.69
  10   6  -4  253.91   18.57
  10   6  -4  275.01   19.21
  10   6  -4  275.84   19.95
 -11  -7   4   45.07    9.78
 -11  -7   4   50.88    9.31
 -11  -7   4   51.85    8.23
  11   7  -4   48.36    9.57
  11   7  -4   47.51    9.04
  11   7  -4   44.91    9.99
 -12  -8   4   22.60    6.79
 -12  -8   4   18.23    6.77
 -12  -8   4   30.01    7.86
  12   8  -4   35.72    8.61
  12   8  -4   22.01    6.66
  12   8  -4   27.47    7.76
 -13  -9   4  244.65   19.32
 -13  -9   4  254.46   21.74
  13   9  -4  184.78   17.98
  13   9  -4  245.88   21.27
  13   9  -4  243.96   19.40
 -14 -10   4  302.85   24.79
 -14 -10   4  281.92   21.65
  14  10  -4  310.90   25.47
  14  10  -4  285.87   22.56
  14  10  -4  289.68   23.43
 -15 -11   4   19.35    8.11
  15  11  -4   14.64    7.91
  15  11  -4   24.30    8.20
  15  11  -4   16.26    7.12
 -16 -12   4   75.18   15.19
  16  12  -4   89.95   16.87
  16  12  -4   66.99   13.58
  16  12  -4   64.46   12.63
 -17 -13   4    1.99    5.47
  17  13  -4    9.87    6.80
  17  13  -4   15.01    9.50
  17  13  -4    0.60    4.66
 -18 -14   4   98.39   18.51
  18  14  -4  110.80   16.84
  18  14  -4  113.79   15.76
 -19 -15   4  131.84   19.41
  19  15  -4  160.27   20.49
  19  15  -4  125.99   17.48
 -20 -16   4   97.96   20.03
  20  16  -4   88.74   16.81
  20  16  -4   83.94   18.48
 -21 -17   4   26.67   12.66
  21  17  -4   27.09   12.40
  21  17  -4   30.35   11.72
 -22 -18   4   55.32   15.78
  22  18  -4   22.36   10.85
  22  18  -4   61.34   15.14
 -23 -19   4   87.57   20.82
  23  19  -4  117.64   23.70
  23  19  -4   65.48   16.39
 -24 -20   4   13.49   11.39
  24  20  -4   36.52   13.09
  24  20  -4   53.53   16.11
 -25 -21   4   45.65   16.11
  25  21  -4   40.56   15.76
  25  21  -4   23.41   11.95
 -26 -22   4   -3.63    7.24
  26  22  -4   12.57   10.75
  26  22  -4    0.28    8.27
 -27 -23   4   34.27   15.74
  27  23  -4    1.04    9.34
  27  23  -4   18.06   12.31
 -28 -24   4   12.91   15.63
  28  24  -4   18.09   12.15
  28  24  -4   24.66   13.25
  24  29   5   22.44   14.16
  23  28   5   37.89   17.51
  23  28   5   50.30   11.86
 -23 -28  -5   33.31   18.19
  22  27   5   84.60   22.58
  22  27   5   68.94   13.35
 -22 -27  -5   87.65   24.77
  21  26   5   28.31    9.08
  21  26   5   49.12   16.34
 -21 -26  -5   54.85   19.19
  20  25   5   74.76   19.92
  20  25   5  112.23   14.58
 -20 -25  -5   42.98   16.76
  19  24   5    9.07    6.37
  19  24   5   30.72   12.99
 -19 -24  -5   32.19   15.65
  18  23   5   62.98   17.93
  18  23   5   47.78   10.70
 -18 -23  -5   78.33   20.37
  17  22   5  250.55   20.59
  17  22   5  297.29   29.86
 -17 -22  -5  253.43   21.32
 -17 -22  -5  222.38   28.87
  16  21   5    5.41    4.75
  16  21   5   16.70   10.06
 -16 -21  -5   -1.21    7.23
 -16 -21  -5    2.48    4.37
  15  20   5  349.65   23.99
  15  20   5  396.97   33.36
 -15 -20  -5  314.34   23.20
 -15 -20  -5  407.40   35.42
  14  19   5   22.80   10.09
  14  19   5   26.16    7.30
 -14 -19  -5   18.92    7.48
 -14 -19  -5   28.07   11.57
  13  18   5  444.57   33.33
  13  18   5  421.16   25.61
 -13 -18  -5  363.77   22.90
 -13 -18  -5  303.09   29.84
  12  17   5  266.31   18.41
  12  17   5  240.09   26.21
  12  17   5  256.41   24.06
 -12 -17  -5  262.47   25.69
 -12 -17  -5  228.59   17.21
  11  16   5   -2.84    5.16
  11  16   5   -1.12    2.44
  11  16   5    4.45    5.83
 -11 -16  -5    1.31    2.73
 -11 -16  -5   -5.14    4.16
  10  15   5   94.34   15.24
  10  15   5  104.29   10.36
  10  15   5  133.35   15.77
 -10 -15  -5  101.50   10.15
 -10 -15  -5  106.41   15.62
   9  14   5  176.47   18.02
   9  14   5  207.32   20.98
   9  14   5  195.51   13.84
  -9 -14  -5  185.16   13.52
  -9 -14  -5  168.04   18.80
   8  13   5  209.88   20.63
   8  13   5  240.01   14.82
   8  13   5  194.26   18.18
  -8 -13  -5  227.05   20.86
  -8 -13  -5  238.53   15.23
   7  12   5  212.12   17.87
   7  12   5  213.58   19.71
   7  12   5  218.72   13.86
  -7 -12  -5  205.02   16.79
  -7 -12  -5  205.77   18.83
  -7 -12  -5  184.37   12.83
   6  11   5   46.90    5.97
   6  11   5   40.55    8.87
   6  11   5   48.92   10.78
  -6 -11  -5   46.79   10.39
  -6 -11  -5   37.64    5.52
  -6 -11  -5   24.25    6.56
   5  10   5  476.73   27.64
   5  10   5  499.57   23.13
   5  10   5  465.82   29.14
  -5 -10  -5  478.83   29.27
  -5 -10  -5  490.35   23.33
  -5 -10  -5  502.51   27.49
   4   9   5  115.04    8.64
   4   9   5  112.24   11.58
   4   9   5  147.56   16.45
   4   9   5  133.58    8.98
  -4  -9  -5  107.28   10.77
  -4  -9  -5  125.47   12.50
   3   8   5   22.55    4.07
   3   8   5   14.38    5.17
   3   8   5   21.67    3.92
   3   8   5   27.25    6.15
  -3  -8  -5   17.98    5.60
  -3  -8  -5   18.85    5.42
   2   7   5  927.10   42.53
   2   7   5  962.84   45.87
   2   7   5  955.48   38.59
   2   7   5  930.37   38.65
  -2  -7  -5  933.50   41.72
  -2  -7  -5  902.08   40.88
   1   6   5  269.05   16.07
   1   6   5  248.71   13.32
   1   6   5  266.45   15.99
  -1  -6  -5  280.68   16.49
  -1  -6  -5  267.74   16.14
  -1  -6  -5  271.93   14.01
   0   5   5    4.67    3.32
   0   5   5    1.75    1.96
   0   5   5    0.21    2.43
   0  -5  -5    0.51    1.89
   0  -5  -5    4.79    2.99
   0  -5  -5    2.68    2.50
  -1   4   5  163.04   10.31
  -1   4   5  164.45    9.80
  -1   4   5  170.19   11.39
   1  -4  -5  161.96   10.99
   1  -4  -5  154.51    9.92
   1  -4  -5  142.99    9.12
  -2   3   5  577.19   25.81
  -2   3   5  562.90   26.36
   2  -3  -5  555.42   25.56
   2  -3  -5  564.67   22.74
   2  -3  -5  584.29   23.29
   2  -3  -5  532.38   25.74
  -3   2   5  585.62   26.48
  -3   2   5  552.47   26.14
   3  -2  -5  572.56   26.66
   3  -2  -5  571.62   26.41
   3  -2  -5  575.79   22.70
  -4   1   5  169.64    8.71
  -4   1   5  168.66   11.56
  -4   1   5  184.96   12.21
   4  -1  -5  157.66   10.94
   4  -1  -5  158.26   11.35
   4  -1  -5  159.83    8.24
  -5   0   5    0.21    2.60
  -5   0   5   -0.34    1.69
  -5   0   5   -1.32    2.35
   5   0  -5    2.27    1.98
   5   0  -5    1.15    2.95
   5   0  -5    0.35    2.75
  -6  -1   5  278.90   16.73
  -6  -1   5  283.32   17.20
  -6  -1   5  284.32   16.99
  -6  -1   5  275.44   14.78
   6   1  -5  270.16   17.05
   6   1  -5  278.75   14.90
  -7  -2   5  923.30   42.63
  -7  -2   5  981.61   42.67
  -7  -2   5  919.99   43.19
  -7  -2   5  961.75   40.77
   7   2  -5 1115.05   50.42
   7   2  -5  935.15   42.62
  -8  -3   5   32.98    6.70
  -8  -3   5   22.75    5.91
  -8  -3   5   20.49    5.36
  -8  -3   5   22.38    5.13
   8   3  -5   18.60    5.03
   8   3  -5   17.53    5.37
   8   3  -5   16.65    5.10
  -9  -4   5  122.26   11.65
  -9  -4   5  118.78   11.18
  -9  -4   5  117.68   11.60
   9   4  -5  129.68   12.33
   9   4  -5  117.31   11.60
   9   4  -5  128.29   12.00
 -10  -5   5  514.38   27.96
 -10  -5   5  489.50   27.69
 -10  -5   5  453.18   27.14
  10   5  -5  479.00   28.25
  10   5  -5  474.65   27.60
  10   5  -5  496.92   28.13
 -11  -6   5   57.77    8.91
 -11  -6   5   51.89    8.20
  11   6  -5   31.58    7.68
  11   6  -5   48.42    9.18
  11   6  -5   36.87    8.32
 -12  -7   5  201.68   17.24
 -12  -7   5  226.00   18.56
 -12  -7   5  204.61   17.18
  12   7  -5  222.27   18.21
  12   7  -5  207.77   17.76
  12   7  -5  200.96   18.32
 -13  -8   5  264.51   20.91
 -13  -8   5  226.95   20.22
 -13  -8   5  191.12   17.29
  13   8  -5  237.37   19.65
  13   8  -5  227.86   19.28
  13   8  -5  205.00   19.37
 -14  -9   5  168.95   17.65
 -14  -9   5  163.49   16.45
  14   9  -5  220.86   19.63
  14   9  -5  174.91   18.76
  14   9  -5  191.34   18.25
 -15 -10   5  101.54   14.40
  15  10  -5  121.27   14.96
  15  10  -5  119.43   16.33
  15  10  -5  153.42   16.99
 -16 -11   5   -0.93    3.91
  16  11  -5   10.90    6.75
  16  11  -5    3.64    5.37
  16  11  -5   10.04   11.52
 -17 -12   5  266.92   25.19
  17  12  -5  196.86   21.53
  17  12  -5  257.93   25.47
  17  12  -5  230.67   22.04
 -18 -13   5  404.21   32.83
  18  13  -5  380.76   45.27
  18  13  -5  377.42   29.66
 -19 -14   5   26.17   10.50
  19  14  -5   25.75   10.68
  19  14  -5   29.38   10.51
 -20 -15   5  381.50   33.64
  20  15  -5  429.90   34.13
  20  15  -5  325.99   29.32
 -21 -16   5   -7.17    4.19
  21  16  -5    2.15    7.31
  21  16  -5   18.19    8.85
 -22 -17   5  211.95   26.95
  22  17  -5  236.18   27.02
  22  17  -5  274.19   27.03
 -23 -18   5   84.91   20.61
  23  18  -5   81.48   17.92
  23  18  -5  106.31   21.42
 -24 -19   5   10.35   10.31
  24  19  -5    8.79    8.71
  24  19  -5   47.64   15.81
 -25 -20   5   54.73   17.14
  25  20  -5  105.00   22.85
  25  20  -5   76.45   18.73
 -26 -21   5   53.38   18.40
  26  21  -5   24.11   23.30
  26  21  -5   60.09   17.06
 -27 -22   5   62.64   20.33
  27  22  -5   71.46   18.88
  27  22  -5   66.13   21.16
 -28 -23   5   33.36   16.26
  28  23  -5   25.79   13.18
  28  23  -5   37.17   15.90
  29  24  -5   20.44   12.77
  29  24  -5   24.52   13.84
  23  29   6    7.34   11.27
  22  28   6   55.82   11.04
  22  28   6   45.59   18.02
 -22 -28  -6   52.55   19.80
  21  27   6   49.57   17.83
  21  27   6   40.79    9.94
 -21 -27  -6   43.00   17.50
  20  26   6    2.94    5.58
 -20 -26  -6    2.48    8.85
  19  25   6   -0.69    6.60
  19  25   6    7.71    5.57
 -19 -25  -6   -3.53    8.62
  18  24   6   24.87   11.81
  18  24   6   25.14    8.45
 -18 -24  -6   32.75   14.98
  17  23   6   -0.85    6.15
  17  23   6    8.35    5.95
 -17 -23  -6    9.22    6.36
 -17 -23  -6    1.89    7.32
  16  22   6    7.88    5.02
  16  22   6   11.96    9.80
 -16 -22  -6    6.99    5.72
 -16 -22  -6   11.47    8.77
  15  21   6  156.50   21.63
  15  21   6  132.47   13.71
 -15 -21  -6  146.90   40.18
 -15 -21  -6  103.64   12.83
  14  20   6  261.84   18.66
  14  20   6  179.03   22.46
 -14 -20  -6  200.92   25.09
  13  19   6   73.66   15.77
  13  19   6   54.65    8.82
 -13 -19  -6   43.14   13.38
 -13 -19  -6   64.20    9.48
  12  18   6   35.17   11.65
  12  18   6   55.09    8.42
 -12 -18  -6   57.53   14.26
 -12 -18  -6   44.87    8.77
  11  17   6  256.00   17.47
  11  17   6  254.20   26.26
  11  17   6  250.47   23.78
 -11 -17  -6  254.50   17.65
 -11 -17  -6  240.66   25.03
  10  16   6  420.78   33.51
  10  16   6  453.97   24.52
  10  16   6  423.10   30.96
 -10 -16  -6  440.25   24.39
 -10 -16  -6  413.95   32.60
   9  15   6  704.68   44.99
   9  15   6  758.87   35.39
   9  15   6  746.06   42.98
  -9 -15  -6  774.00   44.97
  -9 -15  -6  669.95   33.70
   8  14   6  344.94   18.97
   8  14   6  313.19   24.18
   8  14   6  283.75   25.44
  -8 -14  -6  332.16   26.32
  -8 -14  -6  307.76   18.45
   7  13   6  249.18   19.87
   7  13   6  198.85   20.12
   7  13   6  225.81   14.40
  -7 -13  -6  214.16   13.90
   6  12   6  208.14   13.33
   6  12   6  197.35   17.10
   6  12   6  213.69   19.36
   6  12   6  194.10   12.86
  -6 -12  -6  209.31   18.84
  -6 -12  -6  194.58   16.52
   5  11   6   42.75    9.14
   5  11   6   42.61    5.75
   5  11   6   46.27    5.74
   5  11   6   48.32    9.36
  -5 -11  -6   48.63    9.98
  -5 -11  -6   38.22    7.86
   4  10   6  254.10   19.50
   4  10   6  251.31   18.37
   4  10   6  259.38   14.50
   4  10   6  260.66   14.60
  -4 -10  -6  254.17   20.47
  -4 -10  -6  250.06   18.99
   3   9   6  617.13   27.17
   3   9   6  609.87   31.55
   3   9   6  584.78   26.79
   3   9   6  583.45   32.01
  -3  -9  -6  564.50   31.18
  -3  -9  -6  605.46   30.69
   2   8   6  176.68   10.87
   2   8   6  159.42   10.33
   2   8   6  152.58   12.79
   2   8   6  152.69   13.13
  -2  -8  -6  152.07   12.41
  -2  -8  -6  153.43   12.90
   1   7   6  618.45   30.77
   1   7   6  643.79   28.07
   1   7   6  637.10   31.27
  -1  -7  -6  707.55   30.25
  -1  -7  -6  684.71   33.12
  -1  -7  -6  677.34   32.72
   0   6   6  381.47   22.96
   0   6   6  328.42   18.36
   0   6   6  332.49   17.18
   0  -6  -6  322.79   18.16
   0  -6  -6  349.90   17.60
   0  -6  -6  348.79   19.53
  -1   5   6  246.65   15.62
  -1   5   6  259.91   14.50
  -1   5   6  261.60   14.25
   1  -5  -6  265.50   16.31
   1  -5  -6  282.21   15.37
   1  -5  -6  277.99   14.86
  -2   4   6  174.51   11.46
  -2   4   6  161.63   11.98
   2  -4  -6  170.73    9.34
   2  -4  -6  170.33   12.12
   2  -4  -6  162.71   11.45
   2  -4  -6  183.04   10.05
  -3   3   6 1547.44   62.03
  -3   3   6 1532.81   57.68
  -3   3   6 1517.17   62.27
   3  -3  -6 1516.28   60.82
   3  -3  -6 1476.68   60.58
   3  -3  -6 1475.12   55.97
  -4   2   6  164.92   12.02
  -4   2   6  174.05   12.25
  -4   2   6  164.88    8.43
   4  -2  -6  177.93    8.77
   4  -2  -6  167.04   12.35
   4  -2  -6  178.10   12.47
  -5   1   6  269.95   16.61
  -5   1   6  264.49   12.74
   5  -1  -6  278.03   16.57
   5  -1  -6  278.46   13.27
  -6   0   6  325.45   19.60
  -6   0   6  352.37   19.70
  -6   0   6  333.75   16.36
   6   0  -6  334.15   16.59
   6   0  -6  341.58   19.46
  -7  -1   6  647.51   28.63
  -7  -1   6  651.32   31.56
  -7  -1   6  611.93   31.59
  -7  -1   6  623.81   31.27
   7   1  -6  662.83   29.78
   7   1  -6  655.02   32.95
  -8  -2   6  162.35   13.19
  -8  -2   6  158.29   11.55
  -8  -2   6  139.85   12.73
  -8  -2   6  145.63   12.47
   8   2  -6  159.67   13.87
   8   2  -6  165.47   12.08
  -9  -3   6  628.88   32.00
  -9  -3   6  603.44   31.76
  -9  -3   6  616.45   30.03
  -9  -3   6  542.96   30.60
   9   3  -6  654.96   33.95
   9   3  -6  607.71   31.21
 -10  -4   6  239.04   17.09
 -10  -4   6  260.48   18.58
 -10  -4   6  261.72   18.45
 -10  -4   6  245.42   18.28
  10   4  -6  311.74   20.86
  10   4  -6  245.58   18.42
  10   4  -6  247.14   18.01
 -11  -5   6   39.24    8.39
 -11  -5   6   54.77    8.53
 -11  -5   6   40.60    8.49
  11   5  -6   25.07    7.77
  11   5  -6   37.73    8.14
  11   5  -6   48.48    9.16
 -12  -6   6  172.57   16.18
 -12  -6   6  206.19   17.12
 -12  -6   6  218.03   17.64
  12   6  -6  209.24   18.24
  12   6  -6  204.48   17.57
  12   6  -6  245.22   19.22
 -13  -7   6  202.99   17.89
 -13  -7   6  211.93   18.03
 -13  -7   6  208.63   18.20
  13   7  -6  216.92   19.05
  13   7  -6  220.84   18.86
  13   7  -6  202.86   18.58
 -14  -8   6  278.35   23.18
  14   8  -6  288.24   23.29
  14   8  -6  352.71   25.04
  14   8  -6  301.17   24.33
 -15  -9   6  738.62   42.82
  15   9  -6  749.36   42.71
  15   9  -6  697.12   43.10
  15   9  -6  748.90   42.55
 -16 -10   6  458.42   32.45
  16  10  -6  401.61   30.18
  16  10  -6  494.26   32.44
  16  10  -6  412.81   32.00
 -17 -11   6  302.32   26.41
  17  11  -6  225.37   23.61
  17  11  -6  243.15   22.87
  17  11  -6  272.39   24.26
 -18 -12   6   31.15   10.91
  18  12  -6   53.87   13.12
  18  12  -6   72.35   14.92
  18  12  -6   38.16   12.15
 -19 -13   6   43.04   12.33
  19  13  -6   69.98   15.43
  19  13  -6   47.09   12.68
 -20 -14   6  215.55   24.78
  20  14  -6  178.23   25.30
  20  14  -6  208.19   23.37
 -21 -15   6  143.87   21.23
  21  15  -6  145.78   21.15
  21  15  -6  190.10   22.08
 -22 -16   6   21.30   11.28
  22  16  -6   14.98    9.88
  22  16  -6    6.85    7.84
 -23 -17   6    1.86    7.63
  23  17  -6    8.32    7.78
  23  17  -6   -1.91    6.15
 -24 -18   6   18.29   11.62
  24  18  -6   22.33   11.40
  24  18  -6   18.45   10.18
 -25 -19   6   -6.71    6.18
  25  19  -6   -5.31    5.87
  25  19  -6    3.46    8.23
 -26 -20   6   13.82   11.99
  26  20  -6    8.78    8.70
  26  20  -6    8.42    8.61
 -27 -21   6   32.42   15.58
  27  21  -6   28.66   12.57
  27  21  -6   38.95   15.59
 -28 -22   6   60.59   20.96
  28  22  -6   57.90   18.10
  28  22  -6   62.60   19.95
 -29 -23   6   46.30   26.09
  29  23  -6   -4.96    8.16
  29  23  -6   -1.15    9.67
  22  29   7   17.26   13.52
  21  28   7   54.55   10.68
  21  28   7   90.17   23.62
 -21 -28  -7   59.94   19.62
  20  27   7   47.96   16.73
  20  27   7   49.47   10.40
  19  26   7   19.65   12.50
  19  26   7   27.35    7.82
 -19 -26  -7   25.48   13.25
  18  25   7    9.59    5.57
  18  25   7    1.42    8.46
 -18 -25  -7   -6.95    5.46
  17  24   7   42.00    9.20
  17  24   7   43.87   15.07
  17  24   7   28.08    8.83
 -17 -24  -7   36.54   15.14
  16  23   7   -0.63    3.97
  16  23   7   10.37    6.53
  16  23   7    2.22    6.38
 -16 -23  -7    6.02    5.39
 -16 -23  -7    1.95    7.52
  15  22   7  179.12   15.61
  15  22   7  176.47   23.24
 -15 -22  -7  208.59   17.50
 -15 -22  -7  198.63   26.75
  14  21   7  191.05   15.97
  14  21   7  188.68   23.66
 -14 -21  -7  205.25   26.13
 -14 -21  -7  177.71   16.95
  13  20   7  761.80   38.24
  13  20   7  785.65   49.61
 -13 -20  -7  617.62   33.71
 -13 -20  -7  695.24   47.76
  12  19   7   53.13   13.40
  12  19   7   50.13    8.77
 -12 -19  -7   39.83   12.39
 -12 -19  -7   46.85    8.68
  11  18   7  509.81   27.51
  11  18   7  499.27   43.92
  11  18   7  521.77   54.08
 -11 -18  -7  585.18   40.34
 -11 -18  -7  486.49   27.65
  10  17   7  270.95   27.12
  10  17   7  255.13   24.01
  10  17   7  300.75   18.49
  10  17   7  297.77   18.90
 -10 -17  -7  251.53   25.25
 -10 -17  -7  284.40   18.20
   9  16   7  232.43   21.39
   9  16   7  184.42   14.24
   9  16   7  232.18   33.76
   9  16   7  191.65   14.28
  -9 -16  -7  202.87   21.57
   8  15   7  178.65   18.55
   8  15   7  210.22   21.69
   8  15   7  195.30   13.68
   8  15   7  197.08   13.87
  -8 -15  -7  198.90   20.61
   7  14   7  967.53   53.62
   7  14   7 1029.96   51.84
   7  14   7 1004.73   43.55
   7  14   7  977.98   43.49
  -7 -14  -7 1030.94   54.68
   6  13   7  199.73   13.52
   6  13   7  241.92   19.69
   6  13   7  235.72   20.77
   6  13   7  217.25   13.94
  -6 -13  -7  190.81   18.58
   5  12   7  187.25   12.45
   5  12   7  205.41   12.90
   5  12   7  200.80   17.25
   5  12   7  166.06   17.11
  -5 -12  -7  203.69   18.51
  -5 -12  -7  218.01   17.47
   4  11   7   53.38    9.63
   4  11   7   45.72    6.02
   4  11   7   63.18   10.08
   4  11   7   54.54    6.23
  -4 -11  -7   45.81    9.28
  -4 -11  -7   49.54    9.45
   3  10   7  317.52   21.26
   3  10   7  308.26   16.90
   3  10   7  322.43   17.26
   3  10   7  323.15   22.03
  -3 -10  -7  331.78   22.13
  -3 -10  -7  322.92   21.16
   2   9   7  419.11   24.63
   2   9   7  389.33   20.71
   2   9   7  418.03   24.87
   2   9   7  444.56   20.99
  -2  -9  -7  428.12   25.01
  -2  -9  -7  436.18   25.04
   1   8   7  174.20   14.04
   1   8   7  192.31   14.88
   1   8   7  196.96   12.14
  -1  -8  -7  208.73   12.61
  -1  -8  -7  183.51   14.40
  -1  -8  -7  186.76   14.23
   0   7   7   -0.71    2.38
   0   7   7    0.93    2.24
   0   7   7   -3.03    2.17
   0  -7  -7    0.62    2.73
   0  -7  -7   -1.71    2.47
   0  -7  -7   -0.16    2.02
  -1   6   7  682.33   31.11
  -1   6   7  693.20   31.07
  -1   6   7  684.39   33.35
   1  -6  -7  622.25   29.05
   1  -6  -7  677.77   29.92
   1  -6  -7  611.43   31.01
  -2   5   7  927.28   41.12
  -2   5   7  880.31   39.18
   2  -5  -7  965.58   38.64
   2  -5  -7  973.17   39.46
   2  -5  -7  891.30   42.06
   2  -5  -7  977.77   41.75
  -3   4   7  683.70   31.90
   3  -4  -7  630.30   26.24
   3  -4  -7  663.60   27.13
   3  -4  -7  646.31   31.07
   3  -4  -7  630.10   30.53
  -4   3   7  682.32   31.21
  -4   3   7  615.98   25.72
   4  -3  -7  629.44   25.45
   4  -3  -7  632.68   30.85
   4  -3  -7  631.28   30.62
  -5   2   7  960.07   37.78
  -5   2   7  972.16   46.67
  -5   2   7  962.00   43.36
   5  -2  -7  952.38   42.96
   5  -2  -7  967.46   47.29
   5  -2  -7  977.09   37.89
  -6   1   7  723.30   34.10
  -6   1   7  683.66   29.15
  -6   1   7  709.55   34.34
   6  -1  -7  667.01   32.36
   6  -1  -7  641.37   31.20
   6  -1  -7  599.42   26.46
  -7   0   7    0.09    2.62
  -7   0   7    1.37    1.88
  -7   0   7   -2.72    2.90
   7   0  -7   -4.41    1.98
   7   0  -7    1.52    2.21
   7   0  -7    2.26    3.45
  -8  -1   7  155.10   13.85
  -8  -1   7  215.65   15.48
  -8  -1   7  202.38   15.56
  -8  -1   7  200.23   12.54
   8   1  -7  200.15   13.10
   8   1  -7  205.24   16.17
  -9  -2   7  441.94   24.90
  -9  -2   7  412.43   24.49
  -9  -2   7  403.26   24.57
  -9  -2   7  385.43   21.61
   9   2  -7  394.79   22.30
   9   2  -7  437.53   25.78
 -10  -3   7  341.54   22.07
 -10  -3   7  298.52   21.48
 -10  -3   7  336.71   20.09
 -10  -3   7  317.83   22.27
  10   3  -7  333.76   22.37
  10   3  -7  291.84   19.32
 -11  -4   7   46.75    9.62
 -11  -4   7   53.67    9.87
 -11  -4   7   53.34    8.03
 -11  -4   7   40.10    8.47
  11   4  -7   43.38    8.69
  11   4  -7   56.88   10.51
 -12  -5   7  199.94   17.02
 -12  -5   7  165.25   16.15
 -12  -5   7  188.44   17.21
 -12  -5   7  207.70   16.53
  12   5  -7  203.66   16.98
  12   5  -7  180.02   17.35
  12   5  -7  209.72   17.65
 -13  -6   7  240.42   18.86
 -13  -6   7  217.29   19.10
 -13  -6   7  213.65   18.62
  13   6  -7  263.72   20.43
  13   6  -7  207.35   18.61
  13   6  -7  219.11   19.60
 -14  -7   7 1032.53   52.02
  14   7  -7  980.78   51.25
  14   7  -7 1092.11   53.09
  14   7  -7  934.23   51.46
 -15  -8   7  163.45   17.17
  15   8  -7  173.49   18.51
  15   8  -7  209.23   19.92
  15   8  -7  174.80   18.23
 -16  -9   7  181.10   18.85
  16   9  -7  235.86   21.78
  16   9  -7  211.82   21.55
  16   9  -7  222.99   21.55
 -17 -10   7  253.09   23.50
  17  10  -7  312.84   25.97
  17  10  -7  260.95   24.02
  17  10  -7  287.72   39.69
 -18 -11   7  546.17   37.76
  18  11  -7  473.43   34.77
  18  11  -7  551.52   36.77
  18  11  -7  455.19   35.68
 -19 -12   7   71.12   15.42
  19  12  -7   67.63   14.59
  19  12  -7   47.30   20.57
  19  12  -7   48.77   12.95
 -20 -13   7  707.98   47.23
  20  13  -7  770.71   49.82
  20  13  -7  676.62   46.38
 -21 -14   7  236.36   26.25
  21  14  -7  232.49   26.01
  21  14  -7  231.90   25.03
 -22 -15   7  220.91   27.67
  22  15  -7  208.71   24.43
  22  15  -7  201.38   24.78
 -23 -16   7    5.42    8.34
  23  16  -7    1.09    6.56
  23  16  -7   -7.40    5.62
 -24 -17   7   10.59    9.28
  24  17  -7   27.50   11.86
  24  17  -7   32.36   13.30
 -25 -18   7   15.48   11.14
  25  18  -7    6.01    9.12
  25  18  -7    2.45    7.87
 -26 -19   7   16.67   11.68
  26  19  -7   40.85   15.44
  26  19  -7   34.64   14.64
 -27 -20   7   43.69   16.80
  27  20  -7   59.82   18.01
  27  20  -7   52.40   17.58
 -28 -21   7   59.33   20.06
  28  21  -7   70.75   19.83
  28  21  -7   84.40   21.80
 -29 -22   7    6.56   10.95
  29  22  -7    9.90   11.56
  29  22  -7    1.15    9.51
  21  29   8   -3.32    8.71
 -21 -29  -8   -4.27    9.57
  20  28   8   30.70    8.10
  20  28   8   30.00   14.45
 -20 -28  -8   33.42   15.95
  19  27   8   51.98    9.57
  19  27   8   47.46   17.41
 -19 -27  -8   53.46   18.92
  18  26   8   46.40    9.17
  18  26   8   51.54   16.90
 -18 -26  -8   39.31   17.15
  17  25   8   17.24   10.07
  17  25   8    9.81    9.12
  17  25   8    9.83    5.43
 -17 -25  -8   16.23   11.96
  16  24   8   43.84    8.82
  16  24   8   70.91   17.87
  16  24   8   49.43   10.18
 -16 -24  -8   51.26   17.61
  15  23   8   28.52   12.51
  15  23   8   26.71    7.08
 -15 -23  -8   39.70   15.53
  14  22   8   54.69    9.62
  14  22   8   66.90    9.44
  14  22   8   93.15   20.20
 -14 -22  -8   65.23   18.14
  13  21   8  432.72   26.18
  13  21   8  468.42   37.43
  13  21   8  468.74   26.32
 -13 -21  -8  442.16   38.38
  12  20   8   30.68    7.33
  12  20   8   36.83   11.98
  12  20   8   32.19    7.28
 -12 -20  -8   20.35   10.01
  11  19   8   23.54    6.05
  11  19   8   26.04    6.29
  11  19   8   30.64   10.96
 -11 -19  -8   29.66   11.32
  10  18   8   97.36    9.96
  10  18   8   71.90   16.96
  10  18   8   80.22    9.46
 -10 -18  -8   96.98   18.43
   9  17   8   45.35   12.81
   9  17   8   44.02    7.57
   9  17   8   39.10   11.37
  -9 -17  -8   32.79   11.22
   8  16   8 1045.01   45.82
   8  16   8 1025.83   46.02
   8  16   8 1076.59   58.79
   8  16   8 1023.23   55.17
  -8 -16  -8 1007.00   56.02
   7  15   8  172.41   12.87
   7  15   8  166.99   17.99
   7  15   8  187.90   13.13
   7  15   8  196.32   20.43
  -7 -15  -8  192.99   19.83
   6  14   8  314.78   24.36
   6  14   8  336.76   18.72
   6  14   8  301.38   25.34
   6  14   8  322.17   18.48
  -6 -14  -8  339.79   26.24
   5  13   8  186.60   18.86
   5  13   8  216.32   18.81
   5  13   8  219.38   14.07
   5  13   8  228.02   14.19
  -5 -13  -8  255.70   21.37
   4  12   8   23.22    7.44
   4  12   8   39.74    9.00
   4  12   8   26.94    5.20
   4  12   8   29.28    5.61
  -4 -12  -8   13.58    5.99
  -4 -12  -8   26.28    7.23
   3  11   8    7.86    3.27
   3  11   8    5.85    4.83
   3  11   8   11.27    5.09
   3  11   8    3.58    2.47
  -3 -11  -8    0.03    3.86
  -3 -11  -8    9.03    4.65
   2  10   8  684.12   31.10
   2  10   8  674.98   31.43
   2  10   8  662.16   35.58
   2  10   8  697.52   47.77
  -2 -10  -8  666.44   35.24
  -2 -10  -8  685.63   35.52
   1   9   8  107.18   11.39
   1   9   8   94.86   10.44
   1   9   8   84.63    8.09
  -1  -9  -8   84.64    9.85
  -1  -9  -8   79.02    7.89
  -1  -9  -8  102.01   12.45
   0   8   8  653.47   33.86
   0   8   8  650.34   30.64
   0   8   8  694.15   32.77
   0  -8  -8  664.17   30.40
   0  -8  -8  641.01   31.47
   0  -8  -8  615.21   32.55
  -1   7   8  187.58   13.03
  -1   7   8  204.38   13.55
  -1   7   8  208.75   15.35
   1  -7  -8  179.79   12.79
   1  -7  -8  194.50   12.97
   1  -7  -8  176.26   14.11
  -2   6   8  130.14   10.77
  -2   6   8  142.32   12.29
   2  -6  -8  163.70   13.02
   2  -6  -8  146.00    9.84
   2  -6  -8  163.75   12.19
   2  -6  -8  160.12   10.71
  -3   5   8   11.29    4.30
  -3   5   8   26.64    6.71
   3  -5  -8   21.28    3.94
   3  -5  -8   22.10    5.59
   3  -5  -8   28.91    6.27
   3  -5  -8   17.79    3.28
  -4   4   8 2016.07   75.38
  -4   4   8 1995.71   81.02
  -4   4   8 1989.53   81.69
   4  -4  -8 1947.03   79.92
   4  -4  -8 1975.35   73.84
  -5   3   8   20.43    5.70
  -5   3   8   18.83    2.90
  -5   3   8   15.04    4.82
   5  -3  -8   19.58    5.95
   5  -3  -8   24.06    3.12
   5  -3  -8   24.58    5.86
  -6   2   8  143.47   12.47
  -6   2   8  150.63   12.91
  -6   2   8  153.46    8.79
   6  -2  -8  140.97   12.38
   6  -2  -8  150.70   13.28
   6  -2  -8  160.08    8.94
  -7   1   8  202.81   15.49
  -7   1   8  192.57   11.14
  -7   1   8  202.00   15.27
   7  -1  -8  172.26   10.42
   7  -1  -8  167.47   13.84
   7  -1  -8  193.75   15.43
  -8   0   8  619.40   28.75
  -8   0   8  678.25   33.77
  -8   0   8  659.50   34.17
   8   0  -8  605.08   28.70
   8   0  -8  660.38   33.38
   8   0  -8  668.26   34.63
  -9  -1   8   79.56   10.11
  -9  -1   8   94.32    8.43
  -9  -1   8   84.01   10.52
   9   1  -8  102.72   12.07
   9   1  -8   94.59    8.97
 -10  -2   8  663.22   32.54
 -10  -2   8  742.46   37.04
 -10  -2   8  640.37   35.88
 -10  -2   8  693.63   36.31
  10   2  -8  665.76   37.09
  10   2  -8  689.85   33.40
 -11  -3   8   -1.60    2.67
 -11  -3   8   -1.80    3.15
 -11  -3   8    7.20    5.17
 -11  -3   8    6.31    3.49
  11   3  -8    7.80    4.92
  11   3  -8   -0.88    2.32
 -12  -4   8   28.74    7.15
 -12  -4   8   29.26    8.07
 -12  -4   8   23.55    7.20
 -12  -4   8   15.85    6.21
  12   4  -8   33.90    9.51
  12   4  -8   21.68    6.79
 -13  -5   8  208.57   18.94
 -13  -5   8  231.98   18.21
  13   5  -8  237.74   20.67
  13   5  -8  229.27   18.78
 -14  -6   8  333.79   25.30
 -14  -6   8  325.66   23.52
  14   6  -8  302.91   23.54
  14   6  -8  343.59   25.73
 -15  -7   8  198.82   19.23
 -15  -7   8  180.48   18.55
  15   7  -8  202.07   19.32
  15   7  -8  195.00   19.16
  15   7  -8  193.59   19.44
 -16  -8   8 1038.79   54.41
  16   8  -8  986.75   53.65
  16   8  -8  994.01   54.35
  16   8  -8 1020.91   54.37
 -17  -9   8   56.86   12.61
  17   9  -8   56.22   12.57
  17   9  -8   54.60   13.48
  17   9  -8   50.70   12.93
 -18 -10   8  107.02   15.82
  18  10  -8  116.55   16.73
  18  10  -8   88.91   16.67
  18  10  -8   74.75   16.37
 -19 -11   8   33.06   11.18
  19  11  -8    6.13    6.98
  19  11  -8   14.94    8.61
  19  11  -8   39.94   12.06
 -20 -12   8   40.24   12.52
  20  12  -8   37.43   11.69
  20  12  -8   34.43   11.35
 -21 -13   8  531.32   40.20
  21  13  -8  493.02   38.75
  21  13  -8  521.77   39.39
 -22 -14   8   58.73   15.94
  22  14  -8   72.95   18.05
  22  14  -8   50.31   15.11
 -23 -15   8   21.31   10.87
  23  15  -8   54.98   15.54
  23  15  -8   11.54    9.25
 -24 -16   8   47.00   15.82
  24  16  -8   53.15   15.68
  24  16  -8   67.25   18.23
 -25 -17   8   27.59   13.71
  25  17  -8   16.61   11.19
  25  17  -8    8.36    8.92
 -26 -18   8   26.92   12.94
  26  18  -8   40.57   16.30
  26  18  -8   70.79   18.36
 -27 -19   8  117.32   25.50
  27  19  -8   74.75   18.43
  27  19  -8   63.18   19.65
 -28 -20   8   15.00   14.95
  28  20  -8   11.93   11.20
  28  20  -8   24.45   13.80
 -29 -21   8   -6.53    8.03
  29  21  -8   12.62   12.32
  29  21  -8   -3.47    7.74
  21  30   9  131.71   29.16
  20  29   9   37.32   17.21
 -20 -29  -9   29.58   16.37
  19  28   9   44.75   17.40
  19  28   9   51.42    9.65
 -19 -28  -9   49.13   18.78
  18  27   9   43.35    8.20
  18  27   9   68.26   19.96
 -18 -27  -9   67.57   20.93
  17  26   9   48.04    9.14
  17  26   9   44.08   16.43
 -17 -26  -9   34.96   15.10
  16  25   9    9.06    5.86
  16  25   9    4.66    8.52
  16  25   9   18.15    6.26
 -16 -25  -9    3.57    8.28
  15  24   9  193.02   24.72
  15  24   9  144.53   13.69
  15  24   9  151.17   14.23
 -15 -24  -9  152.44   24.93
  14  23   9  588.91   44.97
  14  23   9  576.20   31.45
  14  23   9  601.86   31.20
 -14 -23  -9  632.29   49.11
  13  22   9  117.36   21.81
  13  22   9  106.19   11.46
  13  22   9  104.28   11.24
  12  21   9   25.47    6.57
  12  21   9   24.07   10.51
  12  21   9   17.41    5.73
 -12 -21  -9   46.92   14.46
  11  20   9  279.98   26.77
  11  20   9  234.48   17.10
  11  20   9  261.74   17.44
 -11 -20  -9  284.63   28.76
  10  19   9  180.16   20.58
  10  19   9  106.92   10.83
  10  19   9  119.21   11.29
 -10 -19  -9  117.41   18.39
   9  18   9  667.66   32.70
   9  18   9  637.69   44.73
  -9 -18  -9  668.62   44.56
   8  17   9   51.68   13.14
   8  17   9   46.59    6.96
   8  17   9   45.67    6.98
   8  17   9   47.46   11.79
  -8 -17  -9   45.62   12.31
   7  16   9  207.74   14.22
   7  16   9  200.47   14.10
   7  16   9  163.80   18.57
   7  16   9  180.19   20.49
  -7 -16  -9  222.11   22.25
   6  15   9  694.49   33.54
   6  15   9  740.21   42.25
   6  15   9  681.41   43.01
   6  15   9  745.39   33.99
  -6 -15  -9  685.00   41.55
   5  14   9  180.43   13.05
   5  14   9  187.42   19.20
   5  14   9  215.07   19.39
   5  14   9  187.20   13.13
   4  13   9  218.87   20.00
   4  13   9  219.35   14.58
   4  13   9  269.37   21.10
   4  13   9  242.30   15.27
  -4 -13  -9  199.41   18.56
   3  12   9  136.61   11.10
   3  12   9  151.26   15.49
   3  12   9  139.01   10.92
   3  12   9  155.83   15.14
  -3 -12  -9  176.65   16.45
  -3 -12  -9  153.36   17.09
   2  11   9  287.91   17.02
   2  11   9  249.70   19.85
   2  11   9  274.98   16.33
   2  11   9  254.62   19.75
  -2 -11  -9  259.26   19.44
  -2 -11  -9  254.00   19.26
   1  10   9  285.08   19.67
   1  10   9  277.25   20.19
   1  10   9  274.86   16.58
  -1 -10  -9  279.93   16.60
  -1 -10  -9  261.28   18.65
  -1 -10  -9  242.12   18.68
   0   9   9    1.79    2.37
   0   9   9    5.42    3.58
   0   9   9   -2.41    2.81
   0  -9  -9   -1.04    2.60
   0  -9  -9   -0.24    2.84
   0  -9  -9   -1.36    1.92
  -1   8   9   89.18    9.09
  -1   8   9  105.54   11.42
  -1   8   9   92.13    9.06
   1  -8  -9  113.78    9.38
   1  -8  -9  100.47    9.63
   1  -8  -9   84.00    9.08
  -2   7   9  400.24   22.37
  -2   7   9  426.31   24.75
   2  -7  -9  413.68   23.18
   2  -7  -9  412.34   21.63
   2  -7  -9  423.07   20.84
   2  -7  -9  443.01   25.05
  -3   6   9  573.69   29.18
  -3   6   9  581.62   30.80
   3  -6  -9  604.46   26.91
   3  -6  -9  590.48   25.97
   3  -6  -9  563.33   30.60
   3  -6  -9  593.24   30.25
  -4   5   9  101.27   10.48
  -4   5   9  125.26   11.94
   4  -5  -9  126.23    8.46
   4  -5  -9  115.45   11.42
   4  -5  -9  125.61   11.90
   4  -5  -9  123.89    7.80
  -5   4   9  126.15   11.45
  -5   4   9  103.96    6.82
   5  -4  -9  122.26   12.13
   5  -4  -9  125.11    7.54
   5  -4  -9  142.31   12.37
  -6   3   9  618.57   31.90
  -6   3   9  594.48   24.93
  -6   3   9  570.15   31.05
   6  -3  -9  607.31   24.98
   6  -3  -9  590.82   31.80
   6  -3  -9  572.95   30.88
  -7   2   9  431.75   25.30
  -7   2   9  430.93   24.86
  -7   2   9  398.34   18.97
   7  -2  -9  442.73   26.19
   7  -2  -9  411.67   19.38
   7  -2  -9  438.66   25.10
  -8   1   9   86.39    7.15
  -8   1   9   83.68   10.46
  -8   1   9   96.20   11.18
   8  -1  -9   98.36   10.81
   8  -1  -9   82.54    7.26
   8  -1  -9   75.39   10.36
  -9   0   9   -1.02    3.48
  -9   0   9   -3.95    2.27
  -9   0   9    1.17    2.06
   9   0  -9    2.57    3.87
   9   0  -9   -1.48    1.76
   9   0  -9   -0.96    3.46
 -10  -1   9  268.54   16.40
 -10  -1   9  245.17   19.54
 -10  -1   9  281.35   20.15
 -10  -1   9  272.35   19.93
  10   1  -9  323.40   22.71
  10   1  -9  275.97   17.56
 -11  -2   9  278.57   20.67
 -11  -2   9  259.89   20.33
 -11  -2   9  259.38   20.07
 -11  -2   9  268.07   17.26
  11   2  -9  289.67   18.60
  11   2  -9  259.27   21.40
 -12  -3   9  133.76   14.48
 -12  -3   9  151.68   15.50
 -12  -3   9  157.15   13.29
 -12  -3   9  133.61   18.77
  12   3  -9  145.48   13.72
  12   3  -9  181.76   17.72
 -13  -4   9  236.05   17.77
 -13  -4   9  212.69   19.18
  13   4  -9  203.99   17.22
  13   4  -9  225.74   20.26
 -14  -5   9  193.08   16.85
 -14  -5   9  186.79   18.18
  14   5  -9  197.12   17.47
  14   5  -9  156.74   17.51
 -15  -6   9  734.40   42.77
 -15  -6   9  729.24   40.54
  15   6  -9  729.42   42.84
  15   6  -9  676.92   39.84
 -16  -7   9  174.42   19.11
 -16  -7   9  219.97   19.84
  16   7  -9  176.30   19.67
  16   7  -9  184.05   18.85
 -17  -8   9   46.73   12.45
 -17  -8   9   33.59   10.02
  17   8  -9   65.40   13.40
  17   8  -9   54.70   12.93
 -18  -9   9  769.68   44.44
 -18  -9   9  635.74   43.43
  18   9  -9  699.80   50.83
  18   9  -9  622.70   41.71
  18   9  -9  660.14   43.19
 -19 -10   9  129.96   17.80
 -19 -10   9  123.52   17.79
  19  10  -9   91.43   17.33
  19  10  -9  110.23   17.15
 -20 -11   9  276.72   27.47
 -20 -11   9  271.73   26.52
  20  11  -9  258.43   26.76
  20  11  -9  238.09   25.17
 -21 -12   9   34.41   11.78
 -21 -12   9   44.00   13.14
  21  12  -9   41.12   13.57
  21  12  -9   24.52   10.10
 -22 -13   9  113.38   21.37
  22  13  -9  127.80   20.28
  22  13  -9  123.49   22.41
 -23 -14   9  634.49   55.09
  23  14  -9  574.78   44.00
  23  14  -9  576.68   43.98
 -24 -15   9  174.49   24.48
  24  15  -9  164.84   24.06
  24  15  -9  190.83   25.07
 -25 -16   9    2.76    7.46
 -25 -16   9   17.42   11.66
  25  16  -9   14.51   10.58
  25  16  -9    3.23    8.84
 -26 -17   9   58.84   18.38
 -26 -17   9   53.83   17.91
  26  17  -9   46.17   15.76
  26  17  -9   48.50   16.79
 -27 -18   9   64.41   19.14
 -27 -18   9   74.24   24.81
  27  18  -9   49.89   17.82
 -28 -19   9   50.37   17.97
 -28 -19   9   47.19   17.40
  28  19  -9   66.23   19.86
  28  19  -9   24.38   13.53
 -29 -20   9   13.82   13.43
  29  20  -9   18.20   19.18
  29  20  -9   21.08   13.40
 -30 -21   9  192.42   35.24
 -30 -21   9  163.06   31.68
  20  30  10    1.01    9.85
  19  29  10   15.63   13.21
 -19 -29 -10   -1.28    9.92
  18  28  10   16.91   12.26
  17  27  10   97.32   24.40
  17  27  10   88.01   10.90
 -17 -27 -10  128.83   27.38
  16  26  10   76.49    9.44
  16  26  10   82.41   20.01
 -16 -26 -10   59.41   19.30
  15  25  10    2.65    4.16
  15  25  10    3.25    3.67
  15  25  10   11.62    9.87
 -15 -25 -10    6.35   10.03
  14  24  10  240.56   16.62
  14  24  10  225.11   16.78
  14  24  10  216.81   26.70
 -14 -24 -10  272.92   31.90
  13  23  10   68.95    8.91
  13  23  10   54.10    9.31
  13  23  10   36.01   13.53
 -13 -23 -10   47.76   15.57
  12  22  10  206.06   25.00
  12  22  10  167.31   14.08
  12  22  10  174.42   13.92
 -12 -22 -10  200.51   25.96
  11  21  10  170.47   14.00
  11  21  10  211.45   24.21
  11  21  10  175.91   13.85
 -11 -21 -10  200.79   24.84
  10  20  10  289.23   27.22
  10  20  10  267.85   17.77
  10  20  10  253.78   17.12
 -10 -20 -10  233.00   25.92
   9  19  10  113.76   12.69
   9  19  10  121.64   11.35
   9  19  10  140.37   18.98
   9  19  10  184.31   26.74
  -9 -19 -10  139.29   19.61
   8  18  10  118.56   22.56
   8  18  10   85.77    9.51
   8  18  10  125.03   18.26
  -8 -18 -10   80.94   15.85
   7  17  10  270.72   17.60
   7  17  10  275.60   17.88
   7  17  10  316.00   26.33
   7  17  10  365.15   42.19
  -7 -17 -10  323.27   27.93
   6  16  10  466.43   31.89
   6  16  10  403.27   22.79
   6  16  10  415.94   23.01
   6  16  10  433.42   32.41
  -6 -16 -10  383.89   29.68
   5  15  10  121.05   10.44
   5  15  10  109.68   10.19
   5  15  10   98.22   14.08
   5  15  10  116.07   15.58
  -5 -15 -10   98.44   14.05
   4  14  10  312.35   18.61
   4  14  10  331.27   19.17
   4  14  10  305.79   24.27
   4  14  10  312.13   25.06
  -4 -14 -10  307.69   24.22
   3  13  10   97.65    9.77
   3  13  10  123.12   14.11
   3  13  10  130.52   14.75
   3  13  10  117.50   10.23
  -3 -13 -10  114.25   13.78
   2  12  10  413.20   26.70
   2  12  10  404.67   21.89
   2  12  10  381.12   22.07
   2  12  10  392.43   26.65
  -2 -12 -10  381.70   25.34
   1  11  10   32.17    8.19
   1  11  10   41.05    6.40
   1  11  10   30.93    7.33
  -1 -11 -10   29.56    6.09
  -1 -11 -10   36.29    8.27
  -1 -11 -10   20.63    6.64
   0  10  10 3258.92  130.53
   0  10  10 3306.71  128.10
   0  10  10 3365.92  133.46
   0 -10 -10 3637.46  135.72
   0 -10 -10 3229.20  134.51
   0 -10 -10 3252.08  132.12
  -1   9  10  256.79   19.53
  -1   9  10  257.49   17.31
  -1   9  10  284.16   17.50
   1  -9 -10  261.48   19.42
   1  -9 -10  274.83   18.22
   1  -9 -10  266.24   16.61
   1  -9 -10  269.05   17.58
  -2   8  10  749.56   38.45
  -2   8  10  726.96   35.40
   2  -8 -10  664.74   35.78
   2  -8 -10  695.36   34.31
   2  -8 -10  673.67   32.29
   2  -8 -10  709.84   31.63
  -3   7  10  272.02   17.89
  -3   7  10  263.07   19.17
   3  -7 -10  331.49   20.50
   3  -7 -10  332.92   17.66
   3  -7 -10  247.09   19.50
   3  -7 -10  336.75   16.85
  -4   6  10  231.35   17.69
  -4   6  10  249.99   17.27
   4  -6 -10  255.05   13.60
   4  -6 -10  287.00   19.01
   4  -6 -10  251.82   18.99
   4  -6 -10  273.89   14.73
  -5   5  10  519.72   28.93
  -5   5  10  481.01   27.41
   5  -5 -10  483.10   21.89
   5  -5 -10  474.02   21.10
   5  -5 -10  505.41   28.08
  -6   4  10  248.63   12.52
  -6   4  10  238.76   17.89
  -6   4  10  268.44   19.06
   6  -4 -10  255.31   18.78
   6  -4 -10  239.82   20.87
   6  -4 -10  259.54   12.63
  -7   3  10  342.45   22.09
  -7   3  10  316.39   21.77
  -7   3  10  309.19   15.22
   7  -3 -10  290.68   20.33
   7  -3 -10  311.48   14.96
   7  -3 -10  314.89   21.63
  -8   2  10  704.16   37.10
  -8   2  10  683.02   29.90
  -8   2  10  720.11   36.95
   8  -2 -10  702.21   30.08
   8  -2 -10  666.78   37.25
   8  -2 -10  726.45   36.91
  -9   1  10  296.25   21.09
  -9   1  10  268.86   15.10
  -9   1  10  256.53   19.75
   9  -1 -10  288.49   16.14
   9  -1 -10  281.05   20.45
   9  -1 -10  316.82   22.63
 -10   0  10 3015.96  129.65
 -10   0  10 3267.41  122.73
 -10   0  10 3331.64  130.16
  10   0 -10 3410.73  127.74
  10   0 -10 3364.41  135.95
  10   0 -10 3195.72  133.40
 -11  -1  10   38.79    6.17
 -11  -1  10   37.17    9.14
 -11  -1  10   28.00    7.93
 -11  -1  10   42.51    9.42
  11   1 -10   24.76    5.84
  11   1 -10   34.41    9.23
 -12  -2  10  392.30   30.29
 -12  -2  10  403.24   27.15
 -12  -2  10  413.54   23.50
  12   2 -10  394.92   23.90
  12   2 -10  415.40   28.80
 -13  -3  10  107.96   11.35
 -13  -3  10  110.53   13.83
  13   3 -10  115.36   12.40
  13   3 -10  121.62   15.44
 -14  -4  10  287.20   20.62
 -14  -4  10  304.59   23.95
  14   4 -10  299.87   21.79
  14   4 -10  286.57   24.63
 -15  -5  10  131.33   14.14
 -15  -5  10  128.71   16.18
  15   5 -10  125.94   16.69
  15   5 -10  111.28   13.77
 -16  -6  10  458.20   32.13
 -16  -6  10  428.77   29.13
  16   6 -10  368.09   30.48
  16   6 -10  482.47   30.97
 -17  -7  10  266.69   24.96
 -17  -7  10  328.92   24.94
  17   7 -10  240.78   22.56
  17   7 -10  302.04   26.46
 -18  -8  10   82.90   15.91
 -18  -8  10   89.49   13.71
  18   8 -10   84.89   15.88
  18   8 -10   76.83   16.45
 -19  -9  10  179.04   21.14
 -19  -9  10  127.92   17.23
  19   9 -10  110.96   16.82
  19   9 -10  110.09   17.03
 -20 -10  10  337.56   28.41
 -20 -10  10  278.98   27.80
  20  10 -10  283.05   27.40
  20  10 -10  256.55   26.91
 -21 -11  10  167.43   22.14
 -21 -11  10  208.86   23.03
  21  11 -10  145.24   21.03
 -22 -12  10  156.36   22.78
 -22 -12  10  203.37   23.52
  22  12 -10  216.68   25.78
 -23 -13  10   88.61   19.99
 -23 -13  10   50.04   14.62
  23  13 -10   73.98   17.94
 -24 -14  10  236.68   28.59
 -24 -14  10  233.54   27.43
  24  14 -10  289.12   31.11
 -25 -15  10    2.72    7.68
 -25 -15  10    2.63    8.14
  25  15 -10   16.48   11.23
 -26 -16  10  103.09   23.39
 -26 -16  10   51.82   17.35
  26  16 -10   51.20   16.37
 -27 -17  10   80.11   21.39
 -27 -17  10  149.43   24.30
  27  17 -10  108.06   22.56
 -28 -18  10   12.61   11.42
 -28 -18  10   31.06   14.92
  28  18 -10    1.89   10.20
 -29 -19  10   44.47   18.76
 -30 -20  10    2.16   10.84
 -30 -20  10   16.21   13.14
  30  20 -10   20.30   14.68
  19  30  11   53.98   19.46
 -19 -30 -11   27.51   16.29
  18  29  11    2.49   10.55
 -18 -29 -11   24.69   15.74
  17  28  11  181.18   28.42
 -17 -28 -11  199.24   31.07
  16  27  11   10.94    4.54
  16  27  11   16.13   13.54
 -16 -27 -11   -1.16    7.70
  15  26  11  107.73   23.58
 -15 -26 -11   82.85   21.27
  14  25  11   58.03   17.22
  14  25  11   29.66   10.20
  14  25  11   45.69    8.06
 -14 -25 -11   36.28   14.66
  13  24  11  308.68   19.44
  13  24  11  297.09   18.99
  13  24  11  349.73   33.53
 -13 -24 -11  325.07   34.39
  12  23  11   82.69    9.82
  12  23  11   92.32   20.12
  12  23  11   95.96   10.00
 -12 -23 -11  141.35   22.47
  11  22  11  391.11   22.55
  11  22  11  374.73   21.79
  11  22  11  356.94   33.43
 -11 -22 -11  420.79   37.13
  10  21  11  187.19   14.07
  10  21  11  176.35   13.94
  10  21  11  163.13   21.41
 -10 -21 -11  192.13   24.04
   9  20  11  264.68   17.39
   9  20  11  243.73   16.69
   9  20  11  225.95   24.86
  -9 -20 -11  239.07   26.17
   8  19  11   37.14   12.56
   8  19  11   28.37    6.34
   8  19  11   17.03    9.02
   8  19  11   33.99    9.07
  -8 -19 -11   21.80    9.25
   7  18  11  526.02   27.40
   7  18  11  537.25   37.42
   7  18  11  512.33   38.61
  -7 -18 -11  508.52   36.94
   6  17  11  221.14   23.87
   6  17  11  262.71   16.98
   6  17  11  298.02   25.33
  -6 -17 -11  241.89   23.66
   5  16  11   -3.37    4.22
   5  16  11    2.92    2.76
   5  16  11    9.88    6.22
  -5 -16 -11    4.75    5.80
   4  15  11   15.75    4.89
   4  15  11   20.61    8.38
   4  15  11   22.28    7.84
  -4 -15 -11   29.11    9.51
   3  14  11  358.90   26.14
   3  14  11  351.92   20.31
   3  14  11  308.88   24.98
  -3 -14 -11  346.30   25.66
   2  13  11 1482.59   70.33
   2  13  11 1529.72   63.38
   2  13  11 1545.47   67.05
   2  13  11 1439.99   68.97
  -2 -13 -11 1570.19   71.39
   1  12  11 1239.98   53.10
   1  12  11 1170.86   56.82
   1  12  11 1226.74   59.13
  -1 -12 -11 1221.81   57.25
  -1 -12 -11 1222.99   53.73
   0  11  11    6.50    3.32
   0  11  11    1.51    3.85
   0  11  11    2.23    3.97
   0 -11 -11    0.64    2.79
   0 -11 -11    8.06    4.29
  -1  10  11   19.12    6.86
  -1  10  11   27.03    6.25
   1 -10 -11   22.44    6.97
   1 -10 -11   33.56    6.57
   1 -10 -11   35.34    7.20
   1 -10 -11   33.56    7.04
  -2   9  11  269.13   18.30
  -2   9  11  297.98   21.47
   2  -9 -11  329.05   20.09
   2  -9 -11  258.97   17.37
   2  -9 -11  288.32   17.02
   2  -9 -11  268.18   20.31
  -3   8  11    3.00    4.20
  -3   8  11    3.69    3.38
   3  -8 -11    2.81    3.62
   3  -8 -11    3.06    2.58
   3  -8 -11    0.59    2.11
   3  -8 -11    8.29    4.57
  -4   7  11   50.72    7.91
  -4   7  11   34.61    8.54
   4  -7 -11   48.74    5.32
   4  -7 -11   57.94    8.72
   4  -7 -11   52.93    9.91
   4  -7 -11   41.07    5.72
  -5   6  11   38.48    8.12
  -5   6  11   56.99    8.97
   5  -6 -11   59.52    8.99
   5  -6 -11   47.60    4.88
   5  -6 -11   60.26   10.78
   5  -6 -11   47.51    5.46
  -6   5  11   46.88    4.66
  -6   5  11   48.13    9.57
   6  -5 -11   35.16    4.00
   6  -5 -11   40.55    8.63
   6  -5 -11   36.23    7.99
  -7   4  11   46.19    9.25
  -7   4  11   38.81    8.12
  -7   4  11   39.72    4.32
   7  -4 -11   57.82   10.35
   7  -4 -11   65.39   10.06
   7  -4 -11   47.59    4.66
  -8   3  11   -0.93    2.71
  -8   3  11    1.83    1.93
  -8   3  11   -1.71    3.32
   8  -3 -11    1.68    4.13
   8  -3 -11    0.90    1.73
   8  -3 -11   10.07    5.04
  -9   2  11  280.11   15.03
  -9   2  11  275.78   20.93
  -9   2  11  274.65   20.60
   9  -2 -11  294.21   15.90
   9  -2 -11  308.81   21.95
   9  -2 -11  294.20   22.64
 -10   1  11   31.19    5.00
 -10   1  11   29.91    7.84
 -10   1  11   31.77    8.18
  10  -1 -11   32.53    8.05
  10  -1 -11   29.94    5.42
  10  -1 -11   27.93    7.77
 -11   0  11   -1.10    3.60
 -11   0  11   -4.11    2.65
 -11   0  11   -0.53    1.84
  11   0 -11   -2.67    2.78
  11   0 -11   -1.62    1.91
  11   0 -11   -1.84    3.22
 -12  -1  11 1246.29   60.43
 -12  -1  11 1259.95   54.27
  12   1 -11 1234.86   61.11
  12   1 -11 1193.64   53.40
 -13  -2  11 1645.35   75.12
 -13  -2  11 1595.44   68.83
  13   2 -11 1605.78   76.83
  13   2 -11 1631.05   70.14
 -14  -3  11  394.60   23.76
 -14  -3  11  323.54   25.85
  14   3 -11  328.14   27.06
  14   3 -11  355.77   23.48
 -15  -4  11   24.12    6.94
 -15  -4  11   34.66   10.21
  15   4 -11   18.11    9.25
  15   4 -11   35.40    8.81
 -16  -5  11   -0.96    3.23
 -16  -5  11    2.31    4.91
  16   5 -11    5.00    5.29
  16   5 -11    4.15    5.19
 -17  -6  11  255.31   21.52
 -17  -6  11  271.98   24.50
  17   6 -11  229.02   21.42
  17   6 -11  247.41   24.66
 -18  -7  11  543.46   34.64
 -18  -7  11  494.02   36.31
  18   7 -11  559.95   37.20
 -19  -8  11   28.88   10.68
 -19  -8  11   40.68   11.11
  19   8 -11   28.69   12.88
  19   8 -11   36.26   12.38
 -20  -9  11  257.14   26.34
 -20  -9  11  280.89   25.55
  20   9 -11  256.74   27.22
  20   9 -11  256.49   25.67
 -21 -10  11  124.78   18.27
 -21 -10  11  215.12   24.13
  21  10 -11  177.55   23.31
 -22 -11  11  354.75   33.33
 -22 -11  11  390.32   32.68
  22  11 -11  367.17   34.11
 -23 -12  11  114.31   18.79
 -23 -12  11  137.15   22.07
  23  12 -11  124.97   24.05
 -24 -13  11  316.37   33.12
  24  13 -11  365.49   35.75
 -25 -14  11   53.99   16.50
 -25 -14  11   45.36   15.77
  25  14 -11   45.03   15.82
 -26 -15  11   90.91   20.24
 -26 -15  11  112.31   24.26
  26  15 -11  119.36   23.82
 -27 -16  11    1.13    8.26
 -27 -16  11    2.84    8.59
  27  16 -11    4.64    9.06
 -28 -17  11  141.22   28.20
 -28 -17  11  187.69   27.89
  28  17 -11  126.66   25.90
 -29 -18  11    7.64   10.14
 -29 -18  11   10.95   11.21
  29  18 -11    7.71   11.93
 -30 -19  11   29.80   16.10
 -30 -19  11   14.16   12.91
  30  19 -11   43.15   17.25
  18  30  12   30.72   16.77
 -18 -30 -12   33.82   16.89
  17  29  12    7.24   10.65
 -17 -29 -12    9.82   11.00
  16  28  12   45.80   17.16
 -16 -28 -12   53.46   20.41
  15  27  12   20.42   19.23
  15  27  12   54.78    6.25
 -15 -27 -12   70.88   21.54
  14  26  12   16.17   10.45
  14  26  12   11.12    4.06
  14  26  12    7.50    4.56
 -14 -26 -12   13.06   10.98
  13  25  12   -0.58    4.26
  13  25  12   -3.68    6.71
  13  25  12   -0.33    3.17
 -13 -25 -12   -1.64    7.74
  12  24  12   10.14    8.96
  12  24  12    1.13    3.49
 -12 -24 -12    7.62    9.47
  11  23  12  140.50   21.37
  11  23  12  124.21   16.05
  11  23  12   99.49   10.38
 -11 -23 -12   88.19   28.60
  10  22  12  168.01   13.51
  10  22  12  174.64   14.14
  10  22  12  177.78   23.27
 -10 -22 -12  186.79   23.98
   9  21  12   35.94    7.25
   9  21  12   30.49    6.99
   9  21  12   44.18   13.69
  -9 -21 -12   17.25    9.62
   8  20  12   36.36    7.13
   8  20  12   33.66   11.72
   8  20  12   36.57    7.04
  -8 -20 -12   32.02   11.68
   7  19  12   57.47    7.84
   7  19  12   59.66   14.03
   7  19  12   38.03   12.58
   7  19  12   43.66    7.76
  -7 -19 -12   61.34   14.78
   6  18  12   45.87    7.29
   6  18  12   50.66   13.69
   6  18  12   57.95   14.00
   6  18  12   53.80    7.98
  -6 -18 -12   52.36   13.51
   5  17  12  255.08   16.90
   5  17  12  230.54   23.60
   5  17  12  233.36   16.27
   5  17  12  226.00   22.64
  -5 -17 -12  252.91   23.62
   4  16  12   91.59    9.85
   4  16  12   92.98   16.60
   4  16  12   83.32   15.97
   4  16  12   73.92    8.79
  -4 -16 -12   62.45   13.00
   3  15  12   98.03   14.15
   3  15  12  105.59   10.51
   3  15  12  105.45   10.92
   3  15  12  125.46   15.68
   2  14  12   52.41    8.11
   2  14  12   42.04    9.81
   2  14  12   43.90    7.21
   2  14  12   46.99   11.50
  -2 -14 -12   30.39    8.48
   1  13  12   33.99    9.48
   1  13  12   26.97    6.48
   1  13  12   36.24    9.08
  -1 -13 -12   16.93    5.43
  -1 -13 -12   30.48    8.12
   0  12  12    3.77    3.33
   0  12  12   -3.39    2.64
   0  12  12    3.39    3.97
   0 -12 -12   -1.07    3.10
   0 -12 -12   -0.26    2.91
   0 -12 -12    3.66    3.45
  -1  11  12 1207.53   57.95
  -1  11  12 1154.67   52.70
   1 -11 -12 1215.78   54.99
   1 -11 -12 1251.06   55.34
   1 -11 -12 1185.36   54.34
  -2  10  12  381.29   26.47
  -2  10  12  390.91   23.45
   2 -10 -12  427.71   25.04
   2 -10 -12  406.09   22.27
   2 -10 -12  383.64   23.07
  -3   9  12  112.72   13.53
  -3   9  12  135.64   12.69
   3  -9 -12  169.51   14.59
   3  -9 -12  136.45   10.76
   3  -9 -12  150.01   11.99
  -4   8  12   28.24    7.32
  -4   8  12   17.70    7.12
   4  -8 -12   20.81    6.95
   4  -8 -12   25.22    7.39
   4  -8 -12   31.40    4.69
   4  -8 -12   26.74    5.35
  -5   7  12  196.35   16.51
  -5   7  12  186.70   16.90
   5  -7 -12  224.31   17.85
   5  -7 -12  207.43   17.47
   5  -7 -12  211.10   12.07
   5  -7 -12  212.96   12.92
  -6   6  12  197.20   16.74
  -6   6  12  220.12   18.35
   6  -6 -12  196.27   17.13
   6  -6 -12  205.03   17.30
   6  -6 -12  211.40   12.00
   6  -6 -12  191.52   10.91
  -7   5  12  201.36   17.70
  -7   5  12  201.88   11.14
  -7   5  12  203.42   17.14
   7  -5 -12  197.28   10.91
   7  -5 -12  210.01   18.22
   7  -5 -12  230.54   18.34
  -8   4  12   20.59    3.64
  -8   4  12   13.94    6.34
  -8   4  12   28.94    7.65
   8  -4 -12   22.05    3.69
   8  -4 -12   32.44    8.15
   8  -4 -12   17.36    6.91
  -9   3  12  143.89    9.28
  -9   3  12  114.96   13.72
  -9   3  12  132.29   14.25
   9  -3 -12  139.63   14.86
   9  -3 -12  154.29   15.96
   9  -3 -12  148.92    9.62
 -10   2  12  395.50   19.72
 -10   2  12  365.42   25.97
  10  -2 -12  401.98   27.99
  10  -2 -12  376.96   19.61
 -11   1  12 1281.85   61.56
 -11   1  12 1275.05   53.21
  11  -1 -12 1188.90   59.99
  11  -1 -12 1197.16   50.70
 -12   0  12    0.95    4.13
 -12   0  12    3.83    3.13
  12   0 -12   -4.94    3.40
  12   0 -12    3.18    3.19
 -13  -1  12   29.69    6.37
 -13  -1  12   30.82    9.05
  13   1 -12   35.48    9.99
  13   1 -12   31.65    7.01
 -14  -2  12   43.02    8.08
 -14  -2  12   55.28   12.56
  14   2 -12   42.01    8.67
  14   2 -12   45.78   11.09
 -15  -3  12   82.40   13.37
 -15  -3  12   86.61   10.87
  15   3 -12  102.35   15.64
  15   3 -12   92.55   11.85
 -16  -4  12   75.42   10.96
 -16  -4  12   95.41   14.03
  16   4 -12  100.87   13.04
  16   4 -12  113.10   16.69
 -17  -5  12  253.98   24.12
 -17  -5  12  267.85   21.49
  17   5 -12  240.08   21.46
  17   5 -12  254.56   25.22
 -18  -6  12   36.25    9.98
 -18  -6  12   85.20   23.97
  18   6 -12   26.20   11.15
  18   6 -12   51.94   12.08
 -19  -7  12   51.31   11.94
 -19  -7  12   55.71   13.99
  19   7 -12   31.68   10.67
  19   7 -12   82.37   17.84
 -20  -8  12   24.90   11.16
 -20  -8  12   20.22    8.25
  20   8 -12   33.19   12.45
  20   8 -12   36.84   11.90
 -21  -9  12   36.34   11.80
 -21  -9  12   43.95   11.66
  21   9 -12    7.57    7.90
  21   9 -12   11.76    9.63
 -22 -10  12  181.52   21.47
 -22 -10  12  134.47   21.47
  22  10 -12  164.99   23.89
 -23 -11  12   91.23   20.17
 -23 -11  12  131.95   19.23
  23  11 -12   98.73   21.88
 -24 -12  12   -3.85    5.79
 -24 -12  12   -0.05    8.38
  24  12 -12   -2.33    7.36
 -25 -13  12   -7.49    4.21
 -25 -13  12   -2.34    5.09
  25  13 -12   -4.70    6.06
 -26 -14  12    2.88    7.74
 -26 -14  12   13.88   10.60
  26  14 -12   15.21   12.58
 -27 -15  12   57.77   18.78
 -27 -15  12   83.88   19.40
  27  15 -12   46.15   17.10
 -28 -16  12   97.81   24.13
 -28 -16  12   37.75   14.83
  28  16 -12   88.13   22.71
 -29 -17  12   12.02   11.49
 -29 -17  12   14.18   12.22
  29  17 -12    3.61   10.34
 -30 -18  12   30.57   15.48
 -30 -18  12   27.48   15.38
  30  18 -12   28.14   16.21
  17  30  13   91.04   24.71
 -17 -30 -13  102.68   26.63
  16  29  13   28.38   14.86
 -16 -29 -13   11.39   15.35
  15  28  13  104.58   22.31
 -15 -28 -13   52.34   19.33
  14  27  13   36.19    4.48
  14  27  13   52.82   27.13
 -14 -27 -13   50.79   18.28
  13  26  13  228.28   13.50
  13  26  13  206.64   13.25
  13  26  13  215.54   28.84
 -13 -26 -13  237.80   30.45
  12  25  13   11.93    9.57
  12  25  13    1.21    2.73
  12  25  13    3.08    3.40
 -12 -25 -13   -5.07    6.10
  11  24  13  330.56   33.06
  11  24  13  272.10   17.68
  11  24  13  348.57   25.05
 -11 -24 -13  325.27   33.93
  10  23  13   56.02   16.76
  10  23  13   51.68    7.69
 -10 -23 -13   61.24   16.97
   9  22  13   97.65   10.15
   9  22  13   63.01   16.52
   9  22  13  101.69   10.44
  -9 -22 -13   99.16   19.84
   8  21  13  454.23   25.10
   8  21  13  468.73   25.40
   8  21  13  450.82   36.89
  -8 -21 -13  456.16   36.99
   7  20  13  720.60   35.41
   7  20  13  728.25   35.52
   7  20  13  741.10   48.22
  -7 -20 -13  693.35   46.26
   6  19  13   57.39    8.37
   6  19  13   74.80   16.28
   6  19  13   49.57    7.85
   6  19  13   52.42   14.49
  -6 -19 -13   71.20   15.83
   5  18  13  420.36   34.04
   5  18  13  378.82   22.86
   5  18  13  411.10   32.18
   5  18  13  397.79   23.29
  -5 -18 -13  390.76   31.12
   4  17  13    3.68    3.81
   4  17  13   -2.93    3.56
   4  17  13   -4.70    4.09
   4  17  13    3.37    3.30
  -4 -17 -13   10.86    7.09
   3  16  13  124.54   11.61
   3  16  13  105.60   15.54
   3  16  13   82.13   13.80
   3  16  13   99.53   10.95
  -3 -16 -13  111.86   15.10
   2  15  13  158.04   13.49
   2  15  13  166.55   14.18
   2  15  13  164.32   17.53
   2  15  13  123.92   16.23
  -2 -15 -13  154.02   16.64
   1  14  13   23.53    8.31
   1  14  13   12.00    5.02
   1  14  13   16.76    6.57
   1  14  13    8.20    4.14
  -1 -14 -13    9.74    5.44
  -1 -14 -13    6.67    4.06
   0  13  13   -2.02    2.57
   0  13  13    0.05    3.19
   0  13  13    0.27    3.78
   0 -13 -13    1.86    3.47
   0 -13 -13   -4.05    2.27
   0 -13 -13    4.35    3.72
  -1  12  13   13.68    5.21
  -1  12  13   34.72    9.48
   1 -12 -13   27.06    7.02
   1 -12 -13   29.48    6.68
   1 -12 -13   34.40    8.14
  -2  11  13 1535.17   71.17
  -2  11  13 1497.75   66.25
   2 -11 -13 1602.48   67.40
   2 -11 -13 1579.84   70.46
   2 -11 -13 1634.58   68.98
  -3  10  13  117.83   14.39
   3 -10 -13   97.17    9.45
   3 -10 -13  127.10   11.18
   3 -10 -13  127.20   13.11
  -4   9  13  230.26   17.99
  -4   9  13  243.18   20.17
   4  -9 -13  213.62   18.16
   4  -9 -13  255.10   15.72
   4  -9 -13  239.02   14.45
  -5   8  13  211.64   19.19
  -5   8  13  242.28   18.37
   5  -8 -13  241.39   13.59
   5  -8 -13  237.01   19.05
   5  -8 -13  223.85   14.12
  -6   7  13  215.73   17.94
  -6   7  13  218.03   19.02
   6  -7 -13  214.56   18.50
   6  -7 -13  217.74   12.09
   6  -7 -13  219.70   12.97
  -7   6  13  187.43   17.07
  -7   6  13  195.25   18.04
   7  -6 -13  215.43   12.44
   7  -6 -13  237.14   12.02
   7  -6 -13  205.69   18.66
  -8   5  13  206.53   11.65
  -8   5  13  252.42   20.33
  -8   5  13  224.17   18.79
   8  -5 -13  213.71   19.28
   8  -5 -13  232.24   12.03
  -9   4  13  235.38   12.26
  -9   4  13  167.25   17.64
   9  -4 -13  246.97   21.30
   9  -4 -13  224.54   12.39
 -10   3  13   91.04   12.66
 -10   3  13  108.07    8.16
  10  -3 -13   99.07    7.98
  10  -3 -13  105.51   14.04
 -11   2  13 1541.25   62.54
 -11   2  13 1572.36   72.66
  11  -2 -13 1609.69   76.42
  11  -2 -13 1613.70   65.07
 -12   1  13   23.41    5.29
 -12   1  13   29.08    8.81
  12  -1 -13   34.09    6.36
  12  -1 -13   24.00    8.95
 -13   0  13    6.93    5.76
 -13   0  13    0.44    2.69
  13   0 -13   -2.06    4.49
  13   0 -13   -0.90    2.82
 -14  -1  13   14.00    4.84
 -14  -1  13   11.41    6.28
  14   1 -13    6.76    5.99
  14   1 -13   17.91    5.88
 -15  -2  13  152.26   17.59
 -15  -2  13  165.89   14.40
  15   2 -13  115.02   17.06
  15   2 -13  123.81   13.02
 -16  -3  13  113.41   12.76
 -16  -3  13  148.25   17.73
  16   3 -13  115.29   13.75
  16   3 -13  158.07   19.61
 -17  -4  13    6.47    4.28
 -17  -4  13   13.48    7.90
  17   4 -13    7.52    5.18
  17   4 -13    3.26    7.70
 -18  -5  13  409.35   28.26
 -18  -5  13  413.14   32.48
  18   5 -13  394.97   29.61
  18   5 -13  492.02   36.66
 -19  -6  13   84.94   16.87
 -19  -6  13   77.08   12.69
  19   6 -13   75.69   17.15
  19   6 -13   54.46   13.07
 -20  -7  13  695.33   41.78
 -20  -7  13  642.36   44.74
  20   7 -13  718.78   45.88
  20   7 -13  671.65   47.56
 -21  -8  13  482.70   38.06
 -21  -8  13  455.54   33.66
  21   8 -13  507.29   39.88
  21   8 -13  408.20   34.00
 -22  -9  13   91.12   16.90
 -22  -9  13   67.09   16.45
  22   9 -13   85.27   19.67
 -23 -10  13   57.87   17.29
 -23 -10  13   62.66   15.49
  23  10 -13   50.13   16.01
 -24 -11  13  286.39   28.65
 -24 -11  13  330.47   33.32
  24  11 -13  372.44   36.87
 -25 -12  13   -2.93    5.03
 -25 -12  13    7.52    9.24
  25  12 -13   10.72    9.24
 -26 -13  13  278.28   29.47
 -26 -13  13  178.99   26.68
  26  13 -13  185.73   27.50
 -27 -14  13   24.54   13.01
 -27 -14  13   51.36   18.59
  27  14 -13   84.42   22.21
 -28 -15  13  131.02   25.22
 -28 -15  13  132.78   27.91
  28  15 -13  112.86   29.98
 -29 -16  13   11.90   11.10
 -29 -16  13   12.09   12.22
  29  16 -13   16.50   12.93
 -30 -17  13  104.23   25.06
 -30 -17  13   86.18   25.65
  30  17 -13   52.50   18.38
  16  30  14   10.02   12.11
 -16 -30 -14   21.47   13.54
  15  29  14    0.85   10.13
 -15 -29 -14    2.04   11.48
  14  28  14   99.42   23.32
 -14 -28 -14  116.46   26.63
  13  27  14   49.78   20.20
 -13 -27 -14   35.72   15.57
  12  26  14    6.33    8.88
  12  26  14   10.76    3.60
  12  26  14   12.37    4.07
 -12 -26 -14   33.08   14.65
  11  25  14   41.49    6.42
  11  25  14   42.81   15.58
  11  25  14   36.29    6.29
 -11 -25 -14   25.95   14.79
  10  24  14  209.78   14.95
  10  24  14  252.79   29.02
  10  24  14  244.75   21.08
 -10 -24 -14  203.98   26.94
   9  23  14  615.49   45.63
   9  23  14  634.33   38.99
   9  23  14  577.81   29.92
  -9 -23 -14  678.80   48.85
   8  22  14   67.20    8.65
   8  22  14   53.36   15.63
   8  22  14   58.62    8.45
  -8 -22 -14   84.04   18.57
   7  21  14  207.02   15.32
   7  21  14  193.83   14.96
   7  21  14  181.50   22.99
  -7 -21 -14  236.91   25.72
   6  20  14  218.86   25.13
   6  20  14  242.84   17.08
   6  20  14  235.19   25.09
   6  20  14  201.31   15.81
  -6 -20 -14  225.32   24.37
   5  19  14   27.56    6.61
   5  19  14   27.11    6.80
   5  19  14   26.42   10.61
   5  19  14   23.80   10.40
  -5 -19 -14   25.49    9.75
   4  18  14  103.46   10.92
   4  18  14   73.56   15.99
   4  18  14   89.36   17.77
   4  18  14  101.39   11.07
  -4 -18 -14  101.09   15.72
   3  17  14   30.10   10.33
   3  17  14   42.91   12.60
   3  17  14   24.05    6.35
   3  17  14   17.11    5.63
  -3 -17 -14   18.42    8.24
   2  16  14   75.24   14.58
   2  16  14   92.00   11.23
   2  16  14   65.04    9.22
   2  16  14   84.94   16.65
  -2 -16 -14   64.50   13.04
   1  15  14  345.27   25.44
   1  15  14  317.34   21.05
   1  15  14  310.55   21.57
   1  15  14  298.81   25.69
  -1 -15 -14  324.55   23.28
  -1 -15 -14  316.29   24.39
   0  14  14  168.37   14.63
   0  14  14  148.20   17.64
   0 -14 -14  164.15   16.15
   0 -14 -14  161.60   14.83
   0 -14 -14  168.22   15.21
  -1  13  14   13.01    6.77
   1 -13 -14   10.13    5.29
   1 -13 -14    7.94    4.45
   1 -13 -14    4.42    4.00
  -2  12  14   42.21   10.92
  -2  12  14   62.49   10.66
   2 -12 -14   42.30    9.12
   2 -12 -14   38.77    8.09
   2 -12 -14   42.60    8.06
  -3  11  14  337.10   23.11
  -3  11  14  364.53   26.83
   3 -11 -14  365.93   21.66
   3 -11 -14  319.71   23.20
   3 -11 -14  346.03   20.32
  -4  10  14  318.06   24.37
  -4  10  14  281.20   21.05
   4 -10 -14  288.26   16.73
   4 -10 -14  269.00   17.40
   4 -10 -14  270.01   21.07
  -5   9  14  194.89   16.69
  -5   9  14  171.00   17.44
   5  -9 -14  177.67   12.36
   5  -9 -14  161.97   16.19
   5  -9 -14  164.15   11.25
  -6   8  14  295.61   23.52
  -6   8  14  320.48   22.85
   6  -8 -14  309.44   23.39
   6  -8 -14  311.94   16.82
   6  -8 -14  294.96   15.79
  -7   7  14 1085.15   53.98
  -7   7  14  981.90   52.03
   7  -7 -14  973.38   39.05
   7  -7 -14  943.35   49.69
   7  -7 -14  942.90   39.85
  -8   6  14  298.73   23.72
   8  -6 -14  315.96   24.48
   8  -6 -14  314.17   15.87
   8  -6 -14  308.29   15.15
  -9   5  14  203.56   11.44
  -9   5  14  215.60   19.73
   9  -5 -14  182.47   10.36
   9  -5 -14  167.61   17.68
 -10   4  14  284.97   14.98
 -10   4  14  291.94   23.53
  10  -4 -14  303.27   15.54
  10  -4 -14  272.55   23.89
 -11   3  14  382.96   27.69
 -11   3  14  357.05   18.61
  11  -3 -14  356.94   27.95
  11  -3 -14  357.65   18.62
 -12   2  14   49.48   11.57
 -12   2  14   40.44    5.93
  12  -2 -14   40.99    6.15
  12  -2 -14   51.02   12.34
 -13   1  14   18.69    4.86
 -13   1  14   20.07    8.19
  13  -1 -14   24.69    9.25
  13  -1 -14    9.91    3.86
 -14   0  14  178.93   13.90
 -14   0  14  177.79   19.16
  14   0 -14  170.87   19.66
  14   0 -14  140.09   12.88
 -15  -1  14  306.92   20.21
 -15  -1  14  316.33   26.36
  15   1 -14  278.12   19.70
  15   1 -14  266.56   25.65
 -16  -2  14   58.66   13.29
 -16  -2  14   71.35    9.77
  16   2 -14   65.85   10.34
  16   2 -14   60.04   23.16
 -17  -3  14   26.02    7.50
 -17  -3  14   47.09   20.34
  17   3 -14   25.17    7.81
  17   3 -14   35.81   11.62
 -18  -4  14  131.80   17.93
 -18  -4  14  125.19   14.44
  18   4 -14   79.98   14.46
  18   4 -14  108.47   19.89
 -19  -5  14   34.27    9.83
 -19  -5  14   36.48   12.17
  19   5 -14   39.23   12.75
  19   5 -14   20.74    8.43
 -20  -6  14  234.03   24.95
 -20  -6  14  208.58   20.64
  20   6 -14  236.16   26.62
  20   6 -14  222.33   22.66
 -21  -7  14  158.12   18.94
 -21  -7  14  217.81   24.95
  21   7 -14  227.04   23.57
  21   7 -14  169.14   23.46
 -22  -8  14   79.37   15.68
 -22  -8  14   64.74   16.70
  22   8 -14   55.41   16.56
  22   8 -14   64.86   15.69
 -23  -9  14  643.06   46.78
 -23  -9  14  584.69   41.35
  23   9 -14  771.43   54.58
 -24 -10  14  246.28   28.85
 -24 -10  14  230.19   25.19
  24  10 -14  259.49   31.01
 -25 -11  14   40.79   12.85
 -25 -11  14   49.08   15.38
  25  11 -14   60.85   18.24
 -26 -12  14   26.32   12.49
 -26 -12  14   -1.16    8.64
  26  12 -14    8.67    9.48
 -27 -13  14   50.59   17.38
 -27 -13  14   43.84   15.56
  27  13 -14   39.74   16.73
 -28 -14  14   82.46   21.60
 -28 -14  14   72.42   19.71
  28  14 -14   91.27   28.12
 -29 -15  14   11.31   12.95
 -29 -15  14   23.44   13.86
  29  15 -14  -10.75    6.62
 -30 -16  14    4.35   11.31
 -30 -16  14   27.62   14.16
  30  16 -14   34.02   17.13
 -16 -31 -15   36.25   17.48
  15  30  15  294.32   36.64
  14  29  15   37.18   15.98
 -14 -29 -15   -4.62    9.39
  13  28  15   79.94   20.98
 -13 -28 -15   98.25   24.34
  12  27  15   60.25   18.65
 -12 -27 -15   61.57   19.87
  11  26  15   84.77    7.59
  11  26  15  108.13   24.64
  11  26  15   86.12    7.44
 -11 -26 -15  102.39   23.13
  10  25  15    1.76    3.04
  10  25  15    7.47    3.84
  10  25  15    6.29    9.68
 -10 -25 -15    0.20    6.99
   9  24  15  178.98   24.51
   9  24  15  146.58   12.15
  -9 -24 -15  137.79   22.36
   8  23  15   23.64   12.36
   8  23  15   30.61    6.77
   8  23  15   29.79    6.68
  -8 -23 -15   16.64   11.06
   7  22  15  187.30   14.65
   7  22  15  204.76   25.08
   7  22  15  169.83   14.14
  -7 -22 -15  197.68   24.34
   6  21  15  148.45   13.32
   6  21  15  131.83   20.10
   6  21  15  122.07   12.18
  -6 -21 -15  147.34   20.56
   5  20  15  349.65   22.18
   5  20  15  378.29   32.59
   5  20  15  310.23   21.12
   5  20  15  382.64   32.95
  -5 -20 -15  319.38   29.01
   4  19  15  126.88   13.06
   4  19  15  151.60   20.07
   4  19  15  128.76   12.82
   4  19  15  159.69   20.27
  -4 -19 -15  160.44   19.75
   3  18  15   14.12    5.66
   3  18  15   14.62    8.18
   3  18  15   19.09    6.08
   3  18  15    6.26    6.09
  -3 -18 -15    8.53    6.32
   2  17  15  181.86   20.14
   2  17  15  226.98   18.04
   2  17  15  225.64   20.11
   2  17  15  242.49   23.70
  -2 -17 -15  231.84   21.60
  -2 -17 -15  204.49   19.45
   1  16  15   19.50    6.97
   1  16  15   23.13    7.59
   1  16  15   24.43    9.60
  -1 -16 -15   34.58    8.93
  -1 -16 -15   17.11    9.46
   0  15  15   -0.14    5.27
   0  15  15    3.84    3.80
   0 -15 -15   -0.25    3.74
   0 -15 -15   -0.80    3.00
   0 -15 -15    0.27    4.26
  -1  14  15  358.86   27.49
  -1  14  15  276.05   20.88
   1 -14 -15  311.86   22.33
   1 -14 -15  311.76   21.48
   1 -14 -15  304.08   22.43
  -2  13  15  127.57   13.33
  -2  13  15  115.18   15.83
   2 -13 -15  161.16   14.78
   2 -13 -15  142.82   14.81
   2 -13 -15  136.56   12.82
  -3  12  15  106.77   12.49
  -3  12  15  104.26   14.76
   3 -12 -15   87.10   11.48
   3 -12 -15  135.96   14.23
   3 -12 -15  118.86   11.75
  -4  11  15   17.49    6.43
  -4  11  15   26.01    8.67
   4 -11 -15   20.23    5.66
   4 -11 -15   38.29    9.64
   4 -11 -15   23.55    5.67
  -5  10  15  107.20   13.12
  -5  10  15  138.02   15.79
   5 -10 -15   96.67    8.75
   5 -10 -15  116.88   13.83
   5 -10 -15  101.99    9.62
  -6   9  15  710.69   41.85
   6  -9 -15  738.41   32.99
   6  -9 -15  717.70   41.02
   6  -9 -15  711.43   31.84
  -7   8  15  195.02   19.44
   7  -8 -15  182.46   11.85
   7  -8 -15  211.56   19.51
   7  -8 -15  199.06   11.45
  -8   7  15  208.55   19.92
   8  -7 -15  193.68   11.50
   8  -7 -15  199.55   19.37
   8  -7 -15  186.98   10.71
  -9   6  15  706.08   41.66
   9  -6 -15  725.64   30.01
   9  -6 -15  664.42   41.56
   9  -6 -15  733.30   30.79
 -10   5  15  117.02    7.96
 -10   5  15   95.29   14.12
  10  -5 -15  109.67    7.75
  10  -5 -15  117.67   15.70
 -11   4  15   21.96    8.25
 -11   4  15   17.44    3.77
  11  -4 -15   13.31    7.54
  11  -4 -15   15.90    3.64
 -12   3  15  113.29   14.94
 -12   3  15  100.01    8.42
  12  -3 -15   83.46    8.02
  12  -3 -15  125.82   16.88
 -13   2  15  147.21   17.57
 -13   2  15  147.43   11.23
  13  -2 -15  152.73   19.01
  13  -2 -15  154.51   11.95
 -14   1  15  300.18   18.32
 -14   1  15  289.02   25.31
  14  -1 -15  388.75   30.48
  14  -1 -15  307.20   19.92
 -15   0  15    0.43    3.07
 -15   0  15    5.04    5.66
  15   0 -15   -0.90    4.66
  15   0 -15    1.21    3.29
 -16  -1  15   31.91    7.18
 -16  -1  15   20.17    8.93
  16   1 -15   16.83    9.71
  16   1 -15   17.16    6.72
 -17  -2  15  207.43   17.00
 -17  -2  15  186.17   21.29
  17   2 -15  236.75   19.52
  17   2 -15  240.53   25.50
 -18  -3  15   15.58    5.80
 -18  -3  15    0.39    5.65
  18   3 -15   10.83    9.78
  18   3 -15    6.76    5.72
 -19  -4  15  140.55   19.67
 -19  -4  15  160.92   16.43
  19   4 -15  137.86   20.91
  19   4 -15  121.05   15.78
 -20  -5  15  379.68   32.59
 -20  -5  15  370.45   27.30
  20   5 -15  319.30   31.88
  20   5 -15  369.22   28.61
 -21  -6  15  140.10   20.53
 -21  -6  15  163.45   18.34
  21   6 -15  109.41   17.42
  21   6 -15  129.52   20.79
 -22  -7  15  189.93   24.27
 -22  -7  15  211.40   21.99
  22   7 -15  178.25   21.75
  22   7 -15  161.50   23.81
 -23  -8  15   37.81   12.26
 -23  -8  15   51.98   15.67
  23   8 -15   19.15   12.81
 -24  -9  15  209.46   26.27
 -24  -9  15  156.39   20.87
  24   9 -15  206.85   27.63
 -25 -10  15   19.90   11.29
 -25 -10  15    9.85    7.86
  25  10 -15    2.17    8.66
 -26 -11  15  127.54   25.93
 -26 -11  15  119.46   22.24
  26  11 -15  126.34   26.25
 -27 -12  15   68.48   17.52
 -27 -12  15   97.91   22.23
  27  12 -15   46.20   16.83
 -28 -13  15   90.81   21.18
 -28 -13  15  128.66   27.34
  28  13 -15  115.24   25.69
 -29 -14  15   25.96   12.88
 -29 -14  15    9.17   10.95
  29  14 -15   -2.08    7.55
 -30 -15  15  282.29   36.01
 -30 -15  15  298.40   34.75
  30  15 -15  427.28   45.28
 -31 -16  15   23.20   16.16
 -31 -16  15   14.03   13.37
  31  16 -15   32.88   17.13
  15  31  16   44.23   19.21
 -15 -31 -16   46.50   19.44
  14  30  16    9.65   12.28
 -14 -30 -16   25.04   15.29
  13  29  16    4.12   11.19
 -13 -29 -16   -8.86    7.52
  12  28  16   79.23   21.73
 -12 -28 -16   58.50   18.85
  11  27  16   25.76   13.18
 -11 -27 -16    5.41   10.55
  10  26  16   55.52    9.71
  10  26  16   65.02    6.71
  10  26  16  112.97   24.57
 -10 -26 -16   76.21   20.75
   9  25  16   10.89    4.34
   9  25  16   18.54    5.17
   9  25  16   16.37   11.44
  -9 -25 -16    9.68   10.10
   8  24  16   75.10   18.53
   8  24  16   45.11    8.09
   8  24  16   45.10    7.73
  -8 -24 -16   52.60   26.70
   7  23  16    8.41    4.43
   7  23  16    7.45    8.64
   7  23  16    1.11    3.48
  -7 -23 -16   -9.33    4.82
   6  22  16   16.87    5.98
   6  22  16    9.22    4.72
   6  22  16   10.39    8.35
  -6 -22 -16   -4.67    5.26
   5  21  16    2.84    4.24
   5  21  16    0.06    6.96
   5  21  16   -1.33    3.20
  -5 -21 -16    1.41    6.51
   4  20  16   90.29   16.47
   4  20  16   64.10   10.02
   4  20  16   71.16   16.15
   4  20  16   76.62   17.12
  -4 -20 -16  114.93   17.65
   3  19  16  208.38   22.69
   3  19  16  174.21   16.94
   3  19  16  237.22   24.92
   3  19  16  180.17   16.11
  -3 -19 -16  200.14   21.37
  -3 -19 -16  160.75   18.83
   2  18  16    1.50    3.85
   2  18  16    9.46    5.26
   2  18  16   10.47    8.17
  -2 -18 -16    6.17    5.70
  -2 -18 -16    5.81    6.25
   1  17  16   36.80   10.79
   1  17  16   46.43    9.33
   1  17  16   43.88    9.41
  -1 -17 -16   73.88   11.70
  -1 -17 -16   67.16   13.57
   0  16  16  443.41   33.23
   0  16  16  393.07   25.92
   0 -16 -16  460.48   30.05
   0 -16 -16  420.63   27.93
   0 -16 -16  422.83   27.61
  -1  15  16   19.87    6.69
  -1  15  16   13.90    7.48
   1 -15 -16   28.11    7.83
   1 -15 -16   21.41    6.88
   1 -15 -16   28.11    8.40
  -2  14  16   64.43   22.56
  -2  14  16   63.92   10.33
   2 -14 -16   95.32   11.87
   2 -14 -16   78.51   11.42
   2 -14 -16   60.63    9.30
  -3  13  16  120.77   14.03
  -3  13  16  125.21   16.42
   3 -13 -16  131.96   12.83
   3 -13 -16  100.77   10.96
   3 -13 -16  131.27   14.63
  -4  12  16   78.68   14.93
   4 -12 -16   70.82    9.16
   4 -12 -16   71.08   12.92
   4 -12 -16   64.85    8.20
  -5  11  16    8.71    6.38
   5 -11 -16    0.85    2.57
   5 -11 -16   -6.81    2.12
   5 -11 -16    1.92    2.49
  -6  10  16  446.10   31.83
   6 -10 -16  405.64   29.05
   6 -10 -16  410.49   21.23
   6 -10 -16  448.08   22.64
  -7   9  16  191.63   19.74
   7  -9 -16  183.47   12.12
   7  -9 -16  188.33   19.10
   7  -9 -16  194.69   11.63
  -8   8  16 1088.88   57.68
   8  -8 -16  955.19   53.65
   8  -8 -16 1028.03   42.21
   8  -8 -16 1047.51   41.39
  -9   7  16  190.22   19.96
   9  -7 -16  182.21   19.52
   9  -7 -16  197.87   10.66
   9  -7 -16  194.02   11.23
 -10   6  16  437.02   31.72
  10  -6 -16  402.60   19.42
  10  -6 -16  426.57   19.02
  10  -6 -16  433.71   31.66
 -11   5  16    3.07    1.97
 -11   5  16    5.26    5.44
  11  -5 -16    3.82    2.08
  11  -5 -16   -6.58    2.65
 -12   4  16   81.85    7.10
 -12   4  16   77.99   15.91
  12  -4 -16   72.90   15.55
  12  -4 -16   80.09    7.20
 -13   3  16  107.04    9.02
 -13   3  16  118.50   16.14
  13  -3 -16  113.11   16.57
  13  -3 -16  110.33    9.45
 -14   2  16   69.08    7.88
 -14   2  16   91.36   14.50
  14  -2 -16   70.88   16.53
  14  -2 -16   73.93    8.43
 -15   1  16   21.45    5.60
 -15   1  16   37.99   19.15
  15  -1 -16   32.22    7.11
  15  -1 -16   20.95    9.39
 -16   0  16  405.90   32.35
 -16   0  16  421.57   24.54
  16   0 -16  405.91   24.92
  16   0 -16  407.24   33.90
 -17  -1  16   75.43   16.01
 -17  -1  16   59.50    9.08
  17   1 -16   64.87   16.70
  17   1 -16   32.24    8.16
 -18  -2  16   14.34    8.75
 -18  -2  16    7.50    5.07
  18   2 -16   -2.52    3.78
  18   2 -16    5.82    7.59
 -19  -3  16  172.98   19.61
 -19  -3  16  245.14   25.11
  19   3 -16  190.35   18.83
  19   3 -16  183.53   24.45
 -20  -4  16  105.75   20.45
 -20  -4  16   83.02   12.49
  20   4 -16   68.48   13.58
  20   4 -16   64.58   16.97
 -21  -5  16   -5.62    4.95
 -21  -5  16    5.72    6.15
  21   5 -16    3.98    6.17
  21   5 -16   -0.44    7.52
 -22  -6  16   13.79    9.31
 -22  -6  16   20.62    8.30
  22   6 -16   13.73    8.85
  22   6 -16    2.40    9.09
 -23  -7  16    2.56    5.47
 -23  -7  16   -2.25    6.02
  23   7 -16    3.57    7.78
  23   7 -16    4.43    7.91
 -24  -8  16   48.13   13.16
 -24  -8  16   84.21   19.56
  24   8 -16   79.83   20.13
 -25  -9  16   16.93    9.39
 -25  -9  16   30.88   13.00
  25   9 -16    6.21    8.99
 -26 -10  16  129.01   24.94
 -26 -10  16   83.61   18.89
  26  10 -16   85.58   22.93
 -27 -11  16   10.48   10.48
 -27 -11  16    4.17    7.55
  27  11 -16   -0.18   14.20
 -28 -12  16   22.42   11.76
 -28 -12  16   44.18   16.99
  28  12 -16   84.84   23.09
 -29 -13  16   -3.01    7.33
 -29 -13  16    3.47    8.90
  29  13 -16    5.67   11.76
 -30 -14  16   32.80   16.18
 -30 -14  16   28.99   14.08
  30  14 -16   17.48   13.07
 -31 -15  16   37.66   15.85
 -31 -15  16   12.25   13.75
  31  15 -16   65.81   23.60
  13  30  17  131.18   28.49
 -13 -30 -17   57.87   20.22
  12  29  17   12.94   11.11
 -12 -29 -17   30.57   15.42
  11  28  17  115.58   25.91
 -11 -28 -17  146.20   29.28
  10  27  17   74.16   20.20
 -10 -27 -17   85.65   21.05
   9  26  17   59.11    6.89
   9  26  17   54.40   17.63
  -9 -26 -17   40.92   15.57
   8  25  17   11.60    9.75
   8  25  17    8.03    4.48
  -8 -25 -17   15.34   10.06
   7  24  17   28.90    6.55
   7  24  17   42.83   14.39
   7  24  17   28.37    6.98
  -7 -24 -17   30.61   13.23
   6  23  17    6.69    4.49
   6  23  17   15.38   10.23
   6  23  17    2.30    4.11
  -6 -23 -17   -0.21    5.74
   5  22  17  233.08   27.19
   5  22  17  235.09   18.00
  -5 -22 -17  263.17   27.14
   4  21  17   17.16   10.04
   4  21  17   26.88   11.76
   4  21  17   26.55    7.44
   4  21  17    3.15    4.19
  -4 -21 -17   14.98    9.84
  -4 -21 -17   16.50    8.75
   3  20  17  666.09   35.61
   3  20  17  621.57   45.32
   3  20  17  618.74   34.58
  -3 -20 -17  650.96   42.08
  -3 -20 -17  574.37   38.86
   2  19  17    6.98    5.07
   2  19  17    7.61    7.27
   2  19  17    4.60    4.68
  -2 -19 -17    3.34    6.56
   1  18  17  318.48   22.29
   1  18  17  301.33   28.39
   1  18  17  262.12   21.62
  -1 -18 -17  299.99   25.85
  -1 -18 -17  350.73   26.02
   0  17  17    2.29    5.79
   0  17  17   -1.35    3.46
   0  17  17   -2.26    3.64
   0 -17 -17    8.83    5.54
   0 -17 -17    2.91    4.05
   0 -17 -17    0.00    4.46
  -1  16  17   74.12   16.04
  -1  16  17   47.66   10.21
   1 -16 -17   43.85    9.68
   1 -16 -17   50.40   10.49
   1 -16 -17   59.95   11.71
  -2  15  17  192.65   21.80
   2 -15 -17  200.44   17.02
   2 -15 -17  210.61   19.17
   2 -15 -17  218.31   18.50
  -3  14  17   36.34   11.88
   3 -14 -17   40.56    9.71
   3 -14 -17   33.41    7.93
   3 -14 -17   30.34    7.50
  -4  13  17    2.73    5.75
   4 -13 -17    7.77    4.49
   4 -13 -17   15.31    6.31
   4 -13 -17   15.18    7.07
   5 -12 -17  244.79   16.01
   5 -12 -17  248.50   17.04
   5 -12 -17  254.23   22.10
  -6  11  17  232.61   23.14
   6 -11 -17  260.11   22.73
   6 -11 -17  268.14   16.58
   6 -11 -17  251.85   15.41
  -7  10  17  275.83   24.70
   7 -10 -17  306.50   25.20
   7 -10 -17  295.41   16.85
   7 -10 -17  298.96   16.16
  -8   9  17   31.48   10.07
   8  -9 -17   49.40    5.12
   8  -9 -17   43.69   11.22
   8  -9 -17   42.26    5.35
  -9   8  17   23.96    9.00
   9  -8 -17   56.60   12.88
   9  -8 -17   48.93    4.66
   9  -8 -17   47.03    5.07
 -10   7  17  276.36   25.26
  10  -7 -17  290.95   14.41
  10  -7 -17  286.36   13.86
  10  -7 -17  338.07   27.48
 -11   6  17  246.96   23.81
  11  -6 -17  257.32   13.33
  11  -6 -17  254.89   12.96
  11  -6 -17  279.14   25.56
 -12   5  17  241.37   13.21
 -12   5  17  268.75   24.57
  12  -5 -17  240.75   24.38
  12  -5 -17  242.59   13.20
 -13   4  17    6.79    2.94
  13  -4 -17   -3.11    5.02
  13  -4 -17    4.80    2.80
 -14   3  17   31.63    5.60
 -14   3  17   10.59    7.25
  14  -3 -17   25.28    5.32
  14  -3 -17   28.49   10.28
 -15   2  17  196.13   22.22
 -15   2  17  207.06   14.24
  15  -2 -17  233.83   15.97
  15  -2 -17  223.01   24.70
 -16   1  17   61.18    8.36
 -16   1  17   68.62   15.53
  16  -1 -17   47.66   13.55
  16  -1 -17   55.76   14.10
 -17   0  17    6.37    7.28
 -17   0  17    8.93    4.01
  17   0 -17   16.72    9.90
  17   0 -17   -1.45    3.27
 -18  -1  17  268.49   20.26
 -18  -1  17  381.65   31.46
  18   1 -17  299.44   30.28
  18   1 -17  291.97   21.99
 -19  -2  17    6.13    8.06
 -19  -2  17    2.05    3.99
  19   2 -17   21.90   10.32
  19   2 -17    5.53    5.42
 -20  -3  17  683.76   38.68
 -20  -3  17  677.12   46.72
  20   3 -17  633.52   47.48
  20   3 -17  593.37   37.33
 -21  -4  17   23.71    7.83
 -21  -4  17   28.33   11.32
  21   4 -17   27.27   13.01
  21   4 -17    9.18    6.60
 -22  -5  17  262.18   23.02
 -22  -5  17  241.04   27.57
  22   5 -17  211.83   28.14
  22   5 -17  218.76   28.09
 -23  -6  17    8.57    6.72
 -23  -6  17   14.21    9.73
  23   6 -17    1.75    6.73
  23   6 -17   11.98   11.58
 -24  -7  17   11.21    9.28
 -24  -7  17   29.29   10.08
  24   7 -17   37.84   15.55
 -25  -8  17   15.56    8.88
 -25  -8  17   10.95    9.03
  25   8 -17   -4.17    7.78
 -26  -9  17   59.12   18.37
 -26  -9  17   50.66   14.16
  26   9 -17   49.47   18.80
 -27 -10  17  144.83   32.49
 -27 -10  17  108.89   20.67
  27  10 -17  117.70   28.44
 -28 -11  17  172.91   23.82
 -28 -11  17  126.75   27.23
  28  11 -17  209.42   31.97
 -29 -12  17    8.46   10.26
 -29 -12  17   12.12   12.80
  29  12 -17    4.06   11.53
 -30 -13  17  101.62   22.78
 -30 -13  17   95.72   25.11
  30  13 -17   76.26   23.00
  12  30  18   29.12   16.45
  11  29  18   -0.16    8.70
 -11 -29 -18    1.94    9.41
  10  28  18    3.44    9.71
 -10 -28 -18    7.17   10.04
   9  27  18   66.45   20.93
  -9 -27 -18   70.49   18.90
   8  26  18   39.55    6.94
  -8 -26 -18   54.60   17.60
   7  25  18    7.00    4.27
   7  25  18    9.11    6.35
   7  25  18   -7.00    5.32
  -7 -25 -18    9.89    9.39
   6  24  18   25.31    6.81
   6  24  18   20.78   11.63
   6  24  18   20.09    6.25
  -6 -24 -18   31.80   12.96
   5  23  18   55.23   16.57
   5  23  18   42.35    8.60
  -5 -23 -18   76.04   17.85
   4  22  18   26.02   12.42
   4  22  18   33.24    8.26
   4  22  18   21.11    7.04
  -4 -22 -18   46.89   13.48
   3  21  18   97.70   12.40
   3  21  18   75.78   11.20
   3  21  18   91.02   18.78
  -3 -21 -18   71.25   14.94
  -3 -21 -18  100.60   18.45
   2  20  18   36.87   13.99
   2  20  18   31.67    7.86
   2  20  18   51.85   10.02
  -2 -20 -18   37.27   11.80
  -2 -20 -18   35.94   10.67
   1  19  18  217.31   18.88
   1  19  18  227.01   25.54
   1  19  18  220.03   19.67
  -1 -19 -18  239.20   22.51
  -1 -19 -18  195.43   20.11
   0  18  18    4.22    5.03
   0  18  18   15.00    8.99
   0 -18 -18    7.47    5.81
   0 -18 -18    8.80    6.39
  -1  17  18  371.98   31.88
   1 -17 -18  330.02   24.59
   1 -17 -18  285.99   22.48
  -2  16  18   10.58    8.30
   2 -16 -18    6.27    4.89
   2 -16 -18   16.25    6.88
   2 -16 -18   -0.30    4.20
  -3  15  18    5.70    6.66
   3 -15 -18   11.63    5.13
   3 -15 -18   11.08    5.78
   3 -15 -18   10.11    6.52
  -4  14  18  115.63   17.01
   4 -14 -18   84.08   13.19
   4 -14 -18   91.08   10.32
   4 -14 -18   92.65   11.06
  -5  13  18  362.32   30.24
   5 -13 -18  367.34   22.60
   5 -13 -18  378.56   21.77
   5 -13 -18  395.74   28.96
  -6  12  18   37.17   10.71
   6 -12 -18   41.35    7.37
   6 -12 -18   53.66    6.79
   6 -12 -18   27.15    9.33
  -7  11  18  478.59   34.89
   7 -11 -18  513.78   34.82
   7 -11 -18  490.21   23.84
   7 -11 -18  503.66   24.96
  -8  10  18  113.24   16.56
   8 -10 -18   74.68    7.17
   8 -10 -18  103.80   15.21
   8 -10 -18   92.27    7.18
  -9   9  18  714.48   44.94
   9  -9 -18  654.02   41.94
   9  -9 -18  621.45   26.80
   9  -9 -18  665.10   27.68
 -10   8  18  101.43   16.38
  10  -8 -18   86.98    5.69
  10  -8 -18   86.59   16.21
  10  -8 -18   88.30    6.10
 -11   7  18  483.48   35.44
  11  -7 -18  507.72   20.57
  11  -7 -18  457.93   23.59
  11  -7 -18  534.88   37.36
 -12   6  18   51.01   13.69
  12  -6 -18   47.83    4.51
  12  -6 -18   46.11    4.60
  12  -6 -18   55.96   16.13
 -13   5  18  400.42   32.14
 -13   5  18  409.70   19.27
  13  -5 -18  374.11   32.16
  13  -5 -18  398.79   18.80
 -14   4  18  123.39   17.81
 -14   4  18   97.76    8.20
  14  -4 -18   85.50   17.67
  14  -4 -18  107.99    8.76
 -15   3  18    9.78    3.49
 -15   3  18   18.24    9.12
  15  -3 -18   15.42    4.51
  15  -3 -18   40.55   13.27
 -16   2  18   24.09   10.23
 -16   2  18    5.48    3.38
  16  -2 -18    6.36    4.08
  16  -2 -18   -0.40    5.39
 -17   1  18  317.06   20.26
 -17   1  18  339.21   30.17
  17  -1 -18  293.59   30.48
  17  -1 -18  336.66   23.31
 -18   0  18    3.61    3.87
 -18   0  18    7.63    7.38
  18   0 -18   -2.65    6.36
  18   0 -18    7.46    5.32
 -19  -1  18  177.87   22.85
 -19  -1  18  219.60   17.72
  19   1 -18  165.64   16.76
  19   1 -18  230.55   27.66
 -20  -2  18   70.22   17.58
  20   2 -18   32.75    9.69
  20   2 -18   72.81   18.88
 -21  -3  18   84.37   18.71
 -21  -3  18   94.74   13.12
  21   3 -18   82.05   14.66
  21   3 -18  126.09   23.71
 -22  -4  18   17.23   11.00
 -22  -4  18   37.96    9.79
  22   4 -18   21.58    9.42
  22   4 -18   28.36   14.01
 -23  -5  18   66.25   13.56
 -23  -5  18   59.14   16.77
  23   5 -18   30.48   14.27
  23   5 -18   50.30   14.01
 -24  -6  18   17.35   10.73
 -24  -6  18   32.32   10.57
  24   6 -18   37.88   15.65
  24   6 -18   49.96   13.92
 -25  -7  18    3.65    8.20
 -25  -7  18    8.92    7.66
  25   7 -18   20.10   13.10
 -26  -8  18   47.99   16.01
 -26  -8  18   30.09   11.15
  26   8 -18   77.90   27.01
 -27  -9  18   37.71   19.67
 -27  -9  18   77.40   22.54
  27   9 -18   88.18   23.87
 -28 -10  18   23.42   14.29
 -28 -10  18   35.70   13.62
  28  10 -18   67.81   21.33
 -29 -11  18   27.45   15.44
 -29 -11  18    6.09    9.15
  29  11 -18    0.88   10.10
 -30 -12  18    1.80    8.83
 -30 -12  18   16.94   13.65
  30  12 -18   17.71   13.62
  11  30  19   27.26   16.26
 -11 -30 -19   50.85   18.99
  10  29  19   34.21   16.29
 -10 -29 -19   34.32   15.92
   9  28  19   60.16   20.20
  -9 -28 -19   74.49   21.09
   8  27  19   65.64    9.85
   8  27  19   90.04   22.98
  -8 -27 -19   52.31   16.59
   7  26  19   33.33   14.51
  -7 -26 -19   29.72   12.95
   6  25  19    0.59    7.59
   6  25  19    2.49    4.28
  -6 -25 -19    2.25    8.18
   5  24  19   35.60    9.99
   5  24  19   27.73    7.44
   5  24  19   24.67   12.94
  -5 -24 -19   20.52   10.77
   4  23  19   68.06   10.92
   4  23  19  101.99   21.17
   4  23  19   75.30   11.05
  -4 -23 -19   78.43   17.22
   3  22  19   37.53   13.52
   3  22  19   22.86    7.69
   3  22  19   31.94    8.40
  -3 -22 -19   37.74   11.99
   2  21  19   85.24   19.53
   2  21  19   67.64   11.91
   2  21  19   79.57   13.44
  -2 -21 -19   90.85   17.30
  -2 -21 -19   59.56   13.51
   1  20  19   98.76   19.98
   1  20  19   81.67   12.68
  -1 -20 -19   70.21   13.91
  -1 -20 -19   91.98   15.22
   0  19  19   -7.88    3.52
   0  19  19   -7.14    4.17
   0 -19 -19   -2.25    3.90
   0 -19 -19    3.57    5.71
  -1  18  19  232.74   26.12
   1 -18 -19  217.16   20.29
   1 -18 -19  212.46   20.40
   1 -18 -19  211.93   19.38
  -2  17  19    7.70    7.13
   2 -17 -19   10.74    5.63
   2 -17 -19    3.17    4.71
   2 -17 -19   12.60    6.62
  -3  16  19  174.77   21.65
   3 -16 -19  189.41   17.16
   3 -16 -19  171.10   15.65
   3 -16 -19  180.51   19.10
  -4  15  19  158.59   20.80
   4 -15 -19  135.69   13.68
   4 -15 -19  138.18   13.05
   4 -15 -19  116.36   15.96
  -5  14  19    8.29    7.43
   5 -14 -19   27.72    9.84
   5 -14 -19   34.39    8.51
   5 -14 -19   37.35    8.00
  -6  13  19   69.51   15.16
   6 -13 -19   66.22    8.42
   6 -13 -19   60.55   13.65
   6 -13 -19   71.27    8.08
  -7  12  19   49.28   13.48
   7 -12 -19   49.26    6.28
   7 -12 -19   54.53   12.81
   7 -12 -19   56.36    7.06
  -8  11  19   20.85    8.77
   8 -11 -19   36.14    5.20
   8 -11 -19   30.00    9.68
   8 -11 -19   22.95    4.42
  -9  10  19  127.63   18.60
   9 -10 -19  137.68    8.17
   9 -10 -19  116.46   17.17
   9 -10 -19  135.90    8.55
 -10   9  19  154.61   19.45
  10  -9 -19  139.37    6.93
  10  -9 -19  121.33   17.73
 -11   8  19   22.25    9.44
 -12   7  19   41.25   12.48
  12  -7 -19   54.73   15.08
 -13   6  19   52.10   13.90
  13  -6 -19   57.35    4.26
  13  -6 -19   71.97   16.19
 -14   5  19   23.81    4.01
 -14   5  19   19.29    9.80
  14  -5 -19   34.67    4.40
  14  -5 -19   16.55    8.91
 -15   4  19  181.79   21.94
 -15   4  19  121.20    9.25
  15  -4 -19  158.91   21.54
  15  -4 -19  146.82   10.49
 -16   3  19  234.51   24.80
 -16   3  19  165.28   12.10
  16  -3 -19  170.46   12.68
  16  -3 -19  171.32   22.79
 -17   2  19   13.08    9.90
 -17   2  19    8.55    4.02
  17  -2 -19    6.96    4.05
  17  -2 -19    9.93    8.25
 -18   1  19  192.85   14.81
 -18   1  19  143.58   21.54
  18  -1 -19  218.34   27.06
  18  -1 -19  169.15   15.07
 -19   0  19    1.21    3.87
 -19   0  19    0.16    6.81
  19   0 -19    9.77   10.14
  19   0 -19    0.10    4.31
 -20  -1  19   84.63   18.55
 -20  -1  19   88.19   11.52
  20   1 -19   74.10   11.72
  20   1 -19  113.69   22.96
 -21  -2  19   66.60   11.03
 -21  -2  19  102.71   21.16
  21   2 -19   88.10   21.38
  21   2 -19   59.49   12.39
 -22  -3  19   26.01   11.94
 -22  -3  19   35.87    9.45
  22   3 -19   23.82    9.19
  22   3 -19    6.49    9.81
 -23  -4  19   97.19   14.45
 -23  -4  19   87.11   20.08
  23   4 -19   91.61   22.88
  23   4 -19  100.89   22.61
 -24  -5  19   32.36   11.12
 -24  -5  19   30.60   13.94
  24   5 -19   15.38   11.18
  24   5 -19   14.87    9.84
 -25  -6  19   -0.09    5.02
 -25  -6  19    1.07    8.54
  25   6 -19   -3.32    8.54
 -26  -7  19   26.89   14.12
 -26  -7  19   21.49    9.73
  26   7 -19   55.71   19.30
 -27  -8  19   61.01   15.21
 -27  -8  19   50.80   16.59
  27   8 -19   60.17   19.92
 -28  -9  19   75.78   17.04
 -28  -9  19   88.34   21.70
  28   9 -19   74.60   23.12
 -29 -10  19   25.02   11.88
 -29 -10  19   37.19   17.13
  29  10 -19   47.64   19.77
 -30 -11  19   56.23   17.11
 -30 -11  19   19.30   13.68
  30  11 -19    8.46   13.41
  10  30  20    2.38   11.15
 -10 -30 -20    1.22   10.85
   9  29  20    6.52   11.37
  -9 -29 -20   39.45   15.76
   8  28  20   22.30   15.30
  -8 -28 -20   21.76   13.78
   7  27  20   86.73   22.94
   7  27  20   40.06    9.35
  -7 -27 -20   34.42   14.53
   6  26  20   13.08   10.97
   6  26  20   18.97    6.13
  -6 -26 -20   -6.54    6.37
   5  25  20   72.52   10.64
  -5 -25 -20  107.41   27.71
   4  24  20   14.33   11.18
   4  24  20   31.04    8.49
  -4 -24 -20    8.28    8.72
   3  23  20  103.41   13.46
   3  23  20   89.90   20.20
   3  23  20   66.87   11.97
  -3 -23 -20   94.54   19.22
   2  22  20  138.99   22.00
   2  22  20  141.23   15.74
  -2 -22 -20  105.99   17.25
   1  21  20   89.02   14.95
   1  21  20   90.70   20.24
  -1 -21 -20  122.18   16.66
  -1 -21 -20  106.20   16.36
   0  20  20  411.61   29.39
   0  20  20  378.13   35.39
   0 -20 -20  405.50   30.55
  -1  19  20   95.99   19.91
  -1  19  20  106.39   14.98
   1 -19 -20   97.56   14.49
   1 -19 -20  114.86   14.68
  -2  18  20   34.18   13.19
   2 -18 -20   40.93    9.40
   2 -18 -20   28.00    9.28
   2 -18 -20   35.97   10.28
  -3  17  20  639.08   45.40
   3 -17 -20  668.78   37.24
   3 -17 -20  632.28   35.57
   3 -17 -20  633.63   40.01
  -4  16  20   69.48   16.42
   4 -16 -20   75.88   10.39
   4 -16 -20  104.24   12.23
   4 -16 -20   89.09   14.42
  -5  15  20  348.66   31.70
   5 -15 -20  341.47   21.44
   5 -15 -20  362.86   22.71
   5 -15 -20  333.23   27.71
  -6  14  20  222.53   25.16
   6 -14 -20  225.49   22.64
   6 -14 -20  228.70   16.14
   6 -14 -20  207.15   14.85
  -7  13  20  674.55   45.87
   7 -13 -20  712.72   33.18
   7 -13 -20  699.00   32.21
   7 -13 -20  694.70   44.30
  -8  12  20   31.30   11.31
   8 -12 -20   28.66    4.66
   8 -12 -20   33.63    5.24
   8 -12 -20   51.04   13.51
  -9  11  20  287.00   28.00
   9 -11 -20  326.27   33.19
   9 -11 -20  254.91   12.91
   9 -11 -20  251.89   12.59
 -10  10  20  301.51   28.33
  10 -10 -20  208.81   23.38
 -11   9  20  284.42   27.59
  11  -9 -20  255.91   26.37
 -12   8  20   41.04   12.29
  12  -8 -20   24.65   11.39
 -13   7  20  636.36   44.30
  13  -7 -20  723.18   48.92
 -14   6  20  241.22   25.67
  14  -6 -20  155.04   21.31
 -15   5  20  326.91   30.67
 -15   5  20  337.67   15.77
  15  -5 -20  328.21   31.85
  15  -5 -20  345.79   15.69
 -16   4  20   73.90   17.50
 -16   4  20   79.26    7.14
  16  -4 -20   89.52    7.77
  16  -4 -20   74.35   18.55
 -17   3  20  690.55   47.30
 -17   3  20  660.01   30.95
  17  -3 -20  694.30   48.85
  17  -3 -20  616.76   30.28
 -18   2  20   35.73    6.80
 -18   2  20   34.44   13.23
  18  -2 -20   37.24    7.46
  18  -2 -20   11.57    9.17
 -19   1  20   73.46    9.38
 -19   1  20   79.09   18.37
  19  -1 -20   88.08   11.03
  19  -1 -20   86.60   20.47
 -20   0  20  398.03   25.21
 -20   0  20  468.91   38.04
  20   0 -20  477.48   42.02
  20   0 -20  436.39   27.93
 -21  -1  20   73.25   10.90
 -21  -1  20   96.20   20.84
  21   1 -20   62.69   18.53
  21   1 -20   76.37   12.07
 -22  -2  20  128.05   24.16
 -22  -2  20  131.62   14.97
  22   2 -20  157.77   29.12
  22   2 -20  132.45   16.48
 -23  -3  20   77.59   12.66
 -23  -3  20  102.09   22.22
  23   3 -20   73.14   14.95
  23   3 -20   86.92   21.70
 -24  -4  20   25.31   12.35
 -24  -4  20   15.09    7.74
  24   4 -20   18.96    9.61
  24   4 -20   20.50   13.24
 -25  -5  20   67.27   14.00
 -25  -5  20   53.25   17.56
  25   5 -20   84.44   17.98
 -26  -6  20    4.89    6.38
  26   6 -20   11.14   11.94
 -27  -7  20   52.48   13.87
 -27  -7  20   33.50   15.47
  27   7 -20   63.82   21.42
 -28  -8  20   42.13   21.61
 -28  -8  20   15.42   12.85
  28   8 -20   29.72   15.58
 -29  -9  20   32.22   15.35
 -29  -9  20   13.64    9.88
  29   9 -20   24.66   16.25
 -30 -10  20   25.60   15.38
 -30 -10  20    7.23    9.57
  30  10 -20   25.99   17.13
   9  30  21  198.00   31.29
  -9 -30 -21  133.06   25.90
   8  29  21   -5.08    8.15
  -8 -29 -21    0.51    8.90
   7  28  21   24.33   14.56
  -7 -28 -21   49.54   16.19
   6  27  21   31.75   15.70
   6  27  21   43.08   11.72
  -6 -27 -21   37.05   13.77
   5  26  21   35.72    8.00
   5  26  21   46.68   17.47
  -5 -26 -21   36.08   13.42
   4  25  21   95.48   22.62
   4  25  21   60.67   11.39
  -4 -25 -21   68.39   17.77
   3  24  21  190.11   17.74
   3  24  21  184.00   26.61
  -3 -24 -21  196.08   24.12
   2  23  21  317.73   34.18
   2  23  21  307.21   23.98
  -2 -23 -21  330.35   29.89
   1  22  21   59.18   12.67
   1  22  21   93.02   21.55
  -1 -22 -21  106.17   16.88
  -1 -22 -21   75.85   15.27
   0  21  21    5.45    5.58
   0  21  21    1.92    6.95
   0 -21 -21    4.82    6.06
   0 -21 -21    0.37    4.70
  -1  20  21   67.89   16.86
  -1  20  21  103.13   15.06
   1 -20 -21   94.24   14.47
   1 -20 -21   76.45   14.22
  -2  19  21   59.59   15.88
   2 -19 -21   74.05   13.95
   2 -19 -21   95.37   14.68
   2 -19 -21   79.79   12.31
  -3  18  21  119.93   22.22
   3 -18 -21   96.37   15.01
   3 -18 -21   74.73   11.33
   3 -18 -21  111.36   13.70
  -4  17  21   10.20    8.68
   4 -17 -21   17.64    8.19
   4 -17 -21   19.62    6.92
   4 -17 -21   31.57    7.82
  -5  16  21    5.78    7.63
   5 -16 -21    7.10    4.52
   5 -16 -21   -3.73    4.74
   5 -16 -21    5.17    4.56
  -6  15  21  117.57   18.89
   6 -15 -21  159.22   13.37
   6 -15 -21  138.78   17.35
   6 -15 -21  140.55   18.54
  -7  14  21  203.57   24.16
   7 -14 -21  188.29   13.64
   7 -14 -21  194.92   13.18
   7 -14 -21  206.35   23.46
  -8  13  21  488.70   38.51
   8 -13 -21  459.19   36.45
   8 -13 -21  430.93   22.05
   8 -13 -21  491.56   22.23
  -9  12  21   35.95   12.03
   9 -12 -21   33.72    3.90
   9 -12 -21   30.20   11.10
   9 -12 -21   34.09    3.73
 -10  11  21  159.54   21.14
  10 -11 -21  178.24   21.86
 -11  10  21  143.35   20.37
  11 -10 -21  179.47   22.46
 -12   9  21   49.24   14.08
  12  -9 -21   47.58   14.13
 -13   8  21  417.39   35.36
  13  -8 -21  442.81   36.85
 -14   7  21  188.09   23.92
  14  -7 -21  170.52   23.23
 -15   6  21  136.00   20.61
  15  -6 -21  167.07   23.56
 -16   5  21   -9.14    4.20
  16  -5 -21    8.14    7.74
 -17   4  21   16.07    3.47
 -17   4  21   36.86   12.76
  17  -4 -21   37.65   13.18
  17  -4 -21   21.35    4.16
 -18   3  21  102.13    8.93
 -18   3  21  125.40   23.53
  18  -3 -21   93.98    9.03
  18  -3 -21   89.02   20.58
 -19   2  21   70.64   18.70
 -19   2  21   83.70    8.98
  19  -2 -21   60.36   18.51
  19  -2 -21   68.91    9.05
 -20   1  21   94.19   10.53
 -20   1  21   89.68   20.21
  20  -1 -21   96.17   11.53
  20  -1 -21  131.89   25.16
 -21   0  21   -1.72    3.01
 -21   0  21   -3.62    6.90
  21   0 -21    1.63    4.23
  21   0 -21    0.65    7.67
 -22  -1  21   70.00   11.15
 -22  -1  21   85.32   19.62
  22   1 -21   92.60   23.57
  22   1 -21   64.48   12.48
 -23  -2  21  336.55   24.56
 -23  -2  21  321.49   33.88
  23   2 -21  377.14   39.17
  23   2 -21  335.33   26.46
 -24  -3  21  214.69   28.28
 -24  -3  21  190.34   19.19
  24   3 -21  218.81   22.37
  24   3 -21  204.13   31.52
 -25  -4  21   77.41   21.51
 -25  -4  21   68.75   14.02
  25   4 -21   52.91   13.85
  25   4 -21   72.28   21.42
 -26  -5  21   49.37   12.74
 -26  -5  21   24.72   13.81
  26   5 -21   51.44   19.85
 -27  -6  21   37.48   12.09
 -27  -6  21   84.68   22.61
  27   6 -21   29.35   15.66
 -28  -7  21  100.29   23.99
 -28  -7  21   85.19   18.09
  28   7 -21   50.15   19.26
 -29  -8  21    7.04   11.36
 -29  -8  21    0.26    7.13
  29   8 -21    1.56   10.60
 -30  -9  21  178.29   24.31
 -30  -9  21  229.58   32.96
  30   9 -21  297.14   40.47
   7  29  22   17.40   14.96
  -7 -29 -22   15.37   11.67
   6  28  22   71.69   21.17
  -6 -28 -22   48.13   17.10
   5  27  22   39.58   16.02
   5  27  22   71.05   12.39
  -5 -27 -22   60.84   17.77
   4  26  22    0.19    4.48
   4  26  22    6.28   10.24
  -4 -26 -22   -1.27    8.07
   3  25  22   52.30   18.47
   3  25  22   62.09   11.53
  -3 -25 -22   90.26   19.31
   2  24  22   27.08   15.60
   2  24  22   56.99   11.99
  -2 -24 -22   47.44   13.74
   1  23  22   63.83   18.48
   1  23  22   52.22   12.48
  -1 -23 -22   65.10   15.37
   0  22  22   76.52   14.75
   0  22  22   86.86   20.84
   0 -22 -22   62.66   13.91
   0 -22 -22   93.37   16.70
  -1  21  22   79.96   15.45
  -1  21  22   73.22   18.80
   1 -21 -22   55.03   12.84
   1 -21 -22   70.45   13.69
  -2  20  22  142.58   18.53
  -2  20  22  131.34   24.98
   2 -20 -22  136.06   16.79
   2 -20 -22  156.18   16.88
   2 -20 -22  122.36   17.28
  -3  19  22   50.96   15.11
   3 -19 -22   29.19   10.16
   3 -19 -22   20.21    8.71
   3 -19 -22   34.06    9.36
  -4  18  22   37.49   13.33
   4 -18 -22   14.05    8.60
   4 -18 -22   32.53    8.63
   4 -18 -22   19.33    6.82
  -5  17  22  277.65   29.60
   5 -17 -22  241.48   18.47
   5 -17 -22  237.11   24.94
   5 -17 -22  226.42   17.38
  -6  16  22   14.68   10.07
   6 -16 -22   21.85    6.31
   6 -16 -22   18.91    7.26
   6 -16 -22   17.60    8.87
  -7  15  22  253.33   27.89
   7 -15 -22  197.80   22.78
   7 -15 -22  189.72   13.77
   7 -15 -22  192.93   13.29
  -8  14  22   67.20   16.73
   8 -14 -22   52.56    5.95
   8 -14 -22   57.50    6.43
   8 -14 -22   69.85   16.13
  -9  13  22  112.59   21.51
   9 -13 -22   73.06   16.35
   9 -13 -22  104.43    5.97
 -10  12  22  200.99   24.54
  10 -12 -22  150.80   20.88
 -11  11  22  416.99   35.80
  11 -11 -22  333.80   31.30
 -12  10  22  205.07   24.72
  12 -10 -22  215.90   25.69
 -13   9  22   85.02   18.37
  13  -9 -22   85.77   19.11
 -14   8  22   71.65   17.29
  14  -8 -22   81.71   18.68
 -15   7  22  193.84   24.29
  15  -7 -22  179.33   24.65
 -16   6  22   15.27   10.10
  16  -6 -22   11.81    8.72
 -17   5  22  282.72   30.13
  17  -5 -22  262.57   29.92
 -18   4  22   19.73   10.60
 -18   4  22   34.19    3.98
  18  -4 -22   32.92   13.81
  18  -4 -22   26.96    3.16
 -19   3  22   23.73   12.57
 -19   3  22   33.57    5.23
  19  -3 -22   17.38   11.65
  19  -3 -22   36.44    5.71
 -20   2  22  122.20   23.64
 -20   2  22  143.94   11.62
  20  -2 -22  165.84   26.07
  20  -2 -22  130.09   11.72
 -21   1  22   79.50   20.03
 -21   1  22   73.24    9.38
  21  -1 -22   58.78    9.39
  21  -1 -22   93.49   22.37
 -22   0  22   64.14    9.61
 -22   0  22   65.87   18.80
  22   0 -22   59.24   10.95
  22   0 -22   76.84   20.31
 -23  -1  22   70.12   16.09
 -23  -1  22   51.43   16.21
  23   1 -22   67.70   13.36
  23   1 -22   84.30   22.52
 -24  -2  22   14.32   11.30
 -24  -2  22   66.13   11.91
  24   2 -22   31.92   10.26
  24   2 -22   51.63   18.47
 -25  -3  22   54.33   19.30
 -25  -3  22   85.15   13.44
  25   3 -22   85.85   22.37
 -26  -4  22    9.17   10.50
 -26  -4  22   11.49    7.19
  26   4 -22   13.94   11.50
 -27  -5  22   75.74   15.36
 -27  -5  22   56.38   19.00
  27   5 -22   92.17   24.67
 -28  -6  22   56.86   18.63
 -28  -6  22   65.16   14.58
  28   6 -22   52.90   21.91
 -29  -7  22    9.39   11.09
 -29  -7  22   25.71   11.73
  29   7 -22    1.40    9.80
   6  29  23    3.62   10.76
  -6 -29 -23   20.70   12.48
   5  28  23   28.93   14.63
  -5 -28 -23   41.15   15.06
   4  27  23   19.37   14.71
   4  27  23    8.64    9.22
  -4 -27 -23    5.76    9.55
   3  26  23   35.18   16.05
   3  26  23   26.47    8.43
  -3 -26 -23   21.65   20.17
   2  25  23   12.79   10.78
   2  25  23    7.36    6.34
  -2 -25 -23   40.13   13.48
   1  24  23   50.20   17.91
   1  24  23   90.50   13.97
  -1 -24 -23   95.80   19.00
   0  23  23   -2.68    8.46
   0  23  23    0.50    5.36
   0 -23 -23   -1.74    7.28
   0 -23 -23   -2.25    5.60
  -1  22  23  100.66   22.20
  -1  22  23   52.19   13.29
   1 -22 -23   57.14   12.66
   1 -22 -23   57.36   13.58
  -2  21  23  332.80   34.71
  -2  21  23  324.92   28.23
   2 -21 -23  369.19   27.29
   2 -21 -23  357.30   27.70
  -3  20  23  101.71   21.46
   3 -20 -23  106.95   18.78
   3 -20 -23   79.68   13.98
   3 -20 -23   65.55   12.29
  -4  19  23  134.66   25.27
   4 -19 -23   84.30   12.04
   4 -19 -23  105.86   13.52
   4 -19 -23  101.02   18.40
  -5  18  23   45.52   15.04
   5 -18 -23   46.77   13.20
   5 -18 -23   52.07   10.08
   5 -18 -23   74.09   10.05
  -6  17  23    9.51    9.03
   6 -17 -23    4.02    3.63
   6 -17 -23    6.76    6.44
   6 -17 -23    4.72    4.11
  -7  16  23   -6.75    4.64
   7 -16 -23    7.43    3.84
   7 -16 -23    0.89    5.39
   7 -16 -23    3.14    3.00
  -8  15  23   21.77   11.54
   8 -15 -23   28.62    4.75
   8 -15 -23   36.66   12.47
   8 -15 -23   22.78    4.40
  -9  14  23  615.05   46.46
   9 -14 -23  605.74   43.43
 -10  13  23   42.62   14.15
  10 -13 -23   74.64   17.60
 -11  12  23  145.31   21.48
  11 -12 -23   96.99   20.00
 -12  11  23  110.56   23.05
  12 -11 -23  128.80   20.58
 -13  10  23   24.31   11.74
  13 -10 -23   16.10   10.16
 -14   9  23  565.99   44.14
  14  -9 -23  639.50   48.02
 -15   8  23   18.62   11.48
  15  -8 -23   25.92   12.56
 -16   7  23   17.07   10.77
  16  -7 -23   -1.29    6.16
 -17   6  23   11.31    9.44
  17  -6 -23   14.65   10.28
 -18   5  23   51.71   15.39
  18  -5 -23   75.05   19.90
 -19   4  23   82.17   19.57
  19  -4 -23  156.56   28.54
 -20   3  23   82.72    6.90
 -20   3  23  111.32   22.30
  20  -3 -23   71.31   19.58
  20  -3 -23   85.71    6.60
 -21   2  23  322.88   18.35
 -21   2  23  346.54   35.28
  21  -2 -23  403.37   40.22
  21  -2 -23  344.55   19.81
 -22   1  23   86.62    9.70
 -22   1  23   67.74   18.29
  22  -1 -23   65.06   20.48
 -23   0  23    1.78    4.17
 -23   0  23    1.22    9.67
  23   0 -23    5.42    5.25
  23   0 -23    9.51   11.46
 -24  -1  23   79.97   18.69
 -24  -1  23  119.62   31.83
  24   1 -23   47.68   18.75
  24   1 -23   75.43   15.56
 -25  -2  23   15.41    7.13
 -25  -2  23    3.78    9.00
  25   2 -23   39.65   17.69
 -26  -3  23   65.79   19.39
 -26  -3  23   20.60    8.16
  26   3 -23   45.54   18.65
 -27  -4  23   11.60    7.04
 -27  -4  23   13.74   11.24
  27   4 -23   21.93   14.72
 -28  -5  23   68.37   20.15
 -28  -5  23   42.85   11.92
  28   5 -23   20.04   15.32
 -29  -6  23   23.24   15.02
 -29  -6  23   26.38   16.09
  29   6 -23    1.16   12.00
  -5 -29 -24   19.02   13.51
   4  28  24   29.54   14.75
  -4 -28 -24   26.76   13.04
   3  27  24   27.29   15.40
  -3 -27 -24   14.07   10.63
   2  26  24   63.42   20.05
   2  26  24   82.42   13.34
  -2 -26 -24   60.94   15.98
   1  25  24   75.63   21.72
   1  25  24   60.31   13.00
  -1 -25 -24   42.06   13.61
   0  24  24   35.72   16.04
   0  24  24   67.96   14.29
   0 -24 -24   52.38   13.78
  -1  23  24   81.41   16.35
  -1  23  24   95.16   25.06
   1 -23 -24   48.53   12.22
   1 -23 -24   63.32   14.43
  -2  22  24   37.16   14.91
  -2  22  24   34.52   11.85
   2 -22 -24   47.78   11.73
   2 -22 -24   46.81   13.40
  -3  21  24  162.62   21.82
  -3  21  24  191.59   27.87
   3 -21 -24  172.38   18.62
   3 -21 -24  191.03   18.56
   3 -21 -24  188.63   22.16
  -4  20  24   52.44   17.39
   4 -20 -24   32.98   11.89
   4 -20 -24   20.61    9.28
   4 -20 -24   11.31    6.25
  -5  19  24   36.41   13.97
   5 -19 -24   21.13    9.94
   5 -19 -24   20.61    7.06
   5 -19 -24   26.19    7.48
  -6  18  24   55.10   16.45
   6 -18 -24   54.87   13.76
   6 -18 -24   16.64    5.58
   6 -18 -24   25.02    6.43
  -7  17  24   35.42   14.16
   7 -17 -24   24.48    5.48
   7 -17 -24   10.61    8.31
   7 -17 -24   29.14    5.98
  -8  16  24   58.13   16.58
   8 -16 -24   43.59    5.15
   8 -16 -24   48.01   14.53
   8 -16 -24   54.37    5.61
  -9  15  24  238.29   28.36
   9 -15 -24  184.87   23.54
 -10  14  24  255.64   29.68
  10 -14 -24  181.33   23.79
 -11  13  24  315.81   32.83
  11 -13 -24  331.00   32.47
 -12  12  24    3.11    7.60
  12 -12 -24   -5.12    5.27
 -13  11  24  348.24   34.36
  13 -11 -24  304.35   31.72
 -14  10  24  245.48   28.90
  14 -10 -24  276.16   30.74
 -15   9  24  143.72   25.99
  15  -9 -24  184.98   25.97
 -16   8  24   73.40   19.14
  16  -8 -24   54.71   16.88
 -17   7  24   23.63   12.30
  17  -7 -24   28.37   14.02
 -18   6  24   36.88   14.46
  18  -6 -24   25.23   13.50
 -19   5  24   15.45   11.03
  19  -5 -24   28.24   14.46
 -20   4  24   30.32   12.52
  20  -4 -24   34.84   15.47
 -21   3  24  207.80   28.15
  21  -3 -24  231.45   30.74
 -22   2  24   30.85   14.87
 -22   2  24   33.17    5.04
  22  -2 -24   38.62    5.44
  22  -2 -24   53.99   22.02
 -23   1  24   79.21    8.87
 -23   1  24   67.94   20.25
  23  -1 -24  103.87   24.96
  23  -1 -24   67.05    9.15
 -24   0  24   35.26    7.59
 -24   0  24   49.85   18.37
  24   0 -24   65.09   20.55
 -25  -1  24   56.44   18.73
 -25  -1  24   69.02   11.54
  25   1 -24   58.87   21.03
 -26  -2  24   73.76   11.94
 -26  -2  24   97.72   23.78
  26   2 -24   46.23   19.61
 -27  -3  24   26.44   15.03
  27   3 -24   13.17   13.60
 -28  -4  24   18.70   13.70
  28   4 -24   12.56   14.66
 -29  -5  24    8.20   13.39
  29   5 -24   38.53   19.61
   3  28  25   15.90   13.11
  -3 -28 -25   10.83   10.65
   2  27  25   11.42   11.87
  -2 -27 -25    0.24    8.28
   1  26  25   77.26   22.11
   1  26  25  116.66   15.92
  -1 -26 -25  103.08   19.56
   0  25  25    0.41    5.90
   0  25  25   -0.82    7.74
   0 -25 -25   -3.18    6.54
  -1  24  25   57.94   18.05
  -1  24  25   54.14   13.79
   1 -24 -25   45.03   12.74
  -2  23  25    1.00    8.26
  -2  23  25   14.13    9.07
   2 -23 -25   20.94    8.99
  -3  22  25   70.12   15.83
  -3  22  25   25.66   11.93
   3 -22 -25   62.47   12.64
  -4  21  25   43.06   17.20
   4 -21 -25   64.27   11.57
   4 -21 -25   76.21   17.09
   4 -21 -25   54.88   17.30
  -5  20  25   58.97   24.33
   5 -20 -25   82.22   11.14
   5 -20 -25   58.75   14.87
   5 -20 -25   57.77   10.46
  -6  19  25    1.62    8.54
   6 -19 -25    3.84    4.13
   6 -19 -25    1.78    6.83
   6 -19 -25    2.43    3.64
  -7  18  25    5.20    8.11
   7 -18 -25    2.53    3.18
   7 -18 -25    6.10    8.28
   7 -18 -25    2.65    3.20
  -8  17  25   -1.24    7.31
   8 -17 -25   10.77    2.69
   8 -17 -25   -4.85    5.11
   8 -17 -25   10.10    3.16
  -9  16  25   16.47   10.20
   9 -16 -25   22.03   10.75
 -10  15  25    3.80    7.31
  10 -15 -25   -2.59    5.72
 -11  14  25   44.71   16.20
  11 -14 -25   59.01   16.94
 -12  13  25    2.08    7.44
  12 -13 -25    0.48    6.88
 -13  12  25   14.32    9.44
  13 -12 -25   -8.47    5.02
 -14  11  25   41.83   14.80
  14 -11 -25   76.72   19.79
 -15  10  25   -7.65    5.32
  15 -10 -25   -1.31    7.18
 -16   9  25   15.78   10.94
  16  -9 -25   10.12   10.41
 -17   8  25    6.75    9.27
  17  -8 -25   24.68   13.74
 -18   7  25    2.97    8.61
  18  -7 -25    3.75    9.66
 -19   6  25   -1.91    8.04
  19  -6 -25    7.63    9.56
 -20   5  25  101.18   22.78
  20  -5 -25   61.87   20.03
 -21   4  25   85.59   32.83
  21  -4 -25   53.99   18.88
 -22   3  25   63.65   18.82
  22  -3 -25   51.88   18.43
 -23   2  25   22.88   12.75
  23  -2 -25   47.08   18.72
 -24   1  25   62.24   18.93
  24  -1 -25   53.58   19.54
 -25   0  25   -0.88    9.14
  25   0 -25   10.39   13.02
 -26  -1  25  115.42   25.35
  26   1 -25   82.33   24.38
 -27  -2  25   25.50   15.70
  27   2 -25   -2.43    9.26
 -28  -3  25   20.50   14.44
  28   3 -25   15.01   14.69
   1  27  26   61.44   20.62
  -1 -27 -26   44.63   18.59
   0  26  26   47.85   18.68
   0  26  26   33.85   11.25
   0 -26 -26   31.59   11.52
  -1  25  26   93.64   23.64
  -1  25  26   92.87   18.70
   1 -25 -26  114.43   17.71
  -2  24  26   37.52   16.38
  -2  24  26   92.87   18.03
   2 -24 -26   56.69   13.09
  -3  23  26    2.85    7.76
  -3  23  26   33.43   12.40
   3 -23 -26   30.62    9.81
  -4  22  26   -7.95    5.70
  -4  22  26  -10.78    5.88
   4 -22 -26    4.30    5.05
  -5  21  26   42.94   15.63
   5 -21 -26   41.85    9.08
   5 -21 -26   55.92   15.49
  -6  20  26    4.10    8.72
   6 -20 -26   14.93   10.08
   6 -20 -26    6.14    6.48
   6 -20 -26   14.96    5.21
  -7  19  26    9.83   10.19
   7 -19 -26   28.12    5.37
   7 -19 -26   22.95   10.99
   7 -19 -26   20.41    4.89
  -8  18  26   69.15   20.11
   8 -18 -26   23.02   10.81
   9 -17 -26   53.95   15.85
 -10  16  26  152.04   31.97
  10 -16 -26   99.64   21.05
 -11  15  26   62.36   18.33
  11 -15 -26   82.40   19.59
 -12  14  26    7.55    9.52
  12 -14 -26    4.27    8.13
 -13  13  26  167.46   25.93
  13 -13 -26  210.20   27.62
 -14  12  26   -3.18    7.91
  14 -12 -26    7.05    9.69
 -15  11  26  105.10   22.43
  15 -11 -26  129.39   25.39
 -16  10  26  166.02   25.43
  16 -10 -26   46.46   16.42
 -17   9  26   59.20   20.84
  17  -9 -26   80.53   21.75
  18  -8 -26   28.38   13.86
 -19   7  26   25.28   13.71
  19  -7 -26   31.27   17.47
 -20   6  26   13.19   11.08
  20  -6 -26   14.98   12.54
 -21   5  26   27.85   13.60
  21  -5 -26  100.18   25.60
 -22   4  26   -7.79    6.22
  22  -4 -26   -1.62    8.25
 -23   3  26   35.07   14.80
  23  -3 -26   25.06   15.76
 -24   2  26   82.68   22.01
  24  -2 -26  116.28   27.19
 -25   1  26   93.17   23.95
  25  -1 -26   95.34   25.89
 -26   0  26   46.96   18.15
  26   0 -26   11.92   12.21
 -27  -1  26   49.18   18.45
  27   1 -26   45.41   18.84
  -1  26  27   45.83   13.13
  -1  26  27   38.54   17.98
   1 -26 -27   41.02   18.05
  -2  25  27   -3.29    7.31
  -2  25  27   17.33   13.00
   2 -25 -27    6.83    7.60
  -3  24  27    4.63    8.38
  -3  24  27    7.19   10.80
   3 -24 -27   19.89    8.61
  -4  23  27   16.98   10.58
  -4  23  27   13.71   11.65
   4 -23 -27    6.32    5.83
  -5  22  27   92.47   22.96
  -5  22  27   39.15   14.38
   5 -22 -27   76.83   11.10
   5 -22 -27   89.71   18.87
  -6  21  27   35.16   14.61
   6 -21 -27   37.33    7.30
   6 -21 -27   26.66   11.72
  -7  20  27   45.78   16.75
   7 -20 -27   42.23   13.61
   7 -20 -27   44.31    6.83
  -8  19  27   53.95   17.65
   8 -19 -27   32.67   13.50
  -9  18  27  120.69   26.30
   9 -18 -27   51.87   16.52
 -10  17  27  108.20   25.09
  10 -17 -27   85.23   19.35
 -11  16  27   13.01   10.95
  11 -16 -27    3.83    8.76
 -12  15  27   50.12   18.01
  12 -15 -27   41.43   15.36
 -13  14  27   66.50   20.75
  13 -14 -27   36.73   14.36
 -14  13  27   63.46   18.88
  14 -13 -27   17.99   12.74
 -15  12  27   81.21   21.18
  15 -12 -27   46.74   17.01
 -16  11  27    6.37    9.71
  16 -11 -27   26.51   13.04
 -17  10  27   89.50   21.55
  17 -10 -27  102.40   23.69
 -18   9  27  101.50   23.73
  18  -9 -27   54.37   21.64
 -19   8  27   63.25   19.55
  19  -8 -27  100.33   25.59
 -20   7  27   67.37   19.65
  20  -7 -27   45.00   17.51
 -21   6  27   59.13   19.90
  21  -6 -27   44.82   17.77
 -22   5  27   50.89   16.51
  22  -5 -27   30.75   16.54
 -23   4  27    3.74   10.97
  23  -4 -27   20.98   14.16
 -24   3  27   12.85   12.30
  24  -3 -27   -0.60   10.00
 -25   2  27   11.77   12.24
  25  -2 -27    4.44   11.49
 -26   1  27   64.96   21.25
  26  -1 -27   50.86   22.10
  -3  25  28   11.74   10.12
  -3  25  28    4.50   11.38
  -4  24  28   22.38   12.42
  -4  24  28   37.66   16.45
  -5  23  28   31.73   16.47
  -5  23  28   49.99   15.61
  -6  22  28   48.24   18.50
   6 -22 -28   52.32   15.46
  -7  21  28   92.33   23.64
   7 -21 -28   70.25   17.21
  -8  20  28   -2.49    7.44
   8 -20 -28   25.37   13.62
  -9  19  28   62.82   18.19
   9 -19 -28   75.92   18.80
 -10  18  28   22.02   13.35
  10 -18 -28    6.17    9.88
 -11  17  28  175.06   27.30
  11 -17 -28  146.38   26.88
 -12  16  28   55.23   19.70
  12 -16 -28   46.39   15.96
 -13  15  28  128.02   26.80
  13 -15 -28  112.33   23.88
 -14  14  28  102.86   24.35
  14 -14 -28   65.33   18.91
 -15  13  28   93.57   22.81
  15 -13 -28   51.82   17.44
 -16  12  28   64.27   19.52
 -17  11  28  101.50   23.70
  17 -11 -28  140.77   28.12
 -18  10  28   25.18   13.72
  18 -10 -28   16.04   12.56
 -19   9  28   69.61   19.99
  19  -9 -28  101.71   26.04
 -20   8  28   22.71   13.79
  20  -8 -28   25.33   15.64
 -21   7  28   50.73   17.91
  21  -7 -28   48.62   19.06
 -22   6  28   23.84   14.32
  22  -6 -28   50.86   20.31
 -23   5  28   67.85   20.09
  23  -5 -28   23.75   16.02
 -24   4  28   19.52   13.68
  24  -4 -28   23.22   14.89
 -25   3  28   30.40   15.86
  25  -3 -28   11.46   13.48
  -5  24  29   11.28   11.64
  -5  24  29   41.34   14.92
  -6  23  29   16.52   13.70
  -6  23  29   20.60   12.39
   6 -23 -29   13.33   10.54
  -7  22  29    1.53   10.71
   7 -22 -29    0.51    8.30
  -8  21  29  -12.36    6.57
   8 -21 -29   -2.02    7.18
  -9  20  29   24.71   14.58
   9 -20 -29   15.87   10.85
 -10  19  29   21.04   15.31
  10 -19 -29   37.99   15.00
 -11  18  29    3.82    9.84
  11 -18 -29    5.21    9.10
 -12  17  29    0.91   10.04
  12 -17 -29    1.56    8.77
 -13  16  29    4.31    9.16
  13 -16 -29    9.95   11.20
 -14  15  29   34.13   16.18
 -15  14  29   25.53   14.52
  15 -14 -29    3.33    9.34
 -16  13  29   13.30   13.47
  16 -13 -29    0.26    8.55
 -17  12  29    9.49   12.82
  17 -12 -29    3.33   11.53
 -18  11  29  -10.68    6.84
  18 -11 -29   17.89   13.16
 -19  10  29   52.31   18.76
  19 -10 -29   30.43   16.30
 -20   9  29   27.27   14.96
  20  -9 -29   52.15   19.63
 -21   8  29   -4.96    7.70
  21  -8 -29    6.59   10.59
 -22   7  29   38.73   18.02
  22  -7 -29   -3.33    9.50
 -23   6  29   37.80   16.98
  23  -6 -29   28.91   14.55
 -24   5  29   44.77   19.15
  24  -5 -29   43.05   19.10
  -9  21  30  209.67   32.59
   9 -21 -30  194.58   27.69
 -10  20  30   13.88   12.88
  10 -20 -30   12.65   10.94
 -11  19  30   43.41   18.78
  11 -19 -30   43.23   23.42
 -12  18  30   37.57   15.57
  12 -18 -30    6.01   11.30
 -13  17  30   91.93   24.53
  13 -17 -30   92.64   22.73
 -14  16  30   51.04   18.36
  14 -16 -30   13.99   11.78
 -15  15  30  424.04   44.04
  15 -15 -30  279.89   35.00
 -16  14  30   21.44   14.93
  16 -14 -30   19.03   13.08
 -17  13  30  101.53   26.06
  17 -13 -30  111.91   26.58
 -18  12  30   39.38   16.66
  18 -12 -30   21.64   15.18
 -19  11  30   56.55   18.87
  19 -11 -30   38.33   17.14
 -20  10  30    5.34    9.58
  20 -10 -30   13.71   13.14
 -21   9  30  159.55   31.20
  21  -9 -30  170.68   33.79
 -15  16  31   60.76   22.20
  15 -16 -31   23.33   15.08
 -16  15  31   34.18   16.81
  16 -15 -31   23.83   15.33
  19 -13 -30   33.90   17.42
 -19  13  30   16.96   13.94
  18 -14 -30   56.61   20.73
 -18  14  30   41.04   16.70
  17 -15 -30   15.00   13.28
 -17  15  30    1.75   10.58
  16 -16 -30  -11.47    7.71
 -16  16  30   -6.45    8.97
  15 -17 -30   26.59   14.97
 -15  17  30    6.42   11.66
  14 -18 -30   49.30   17.72
 -14  18  30   53.99   18.73
  13 -19 -30    6.41   11.05
 -13  19  30   21.59   14.22
  23  -8 -29   49.23   21.01
 -23   8  29   44.81   17.60
  22  -9 -29   23.41   16.00
 -22   9  29   46.48   19.32
  21 -10 -29  141.33   30.30
 -21  10  29  153.50   30.42
  20 -11 -29  127.41   28.38
 -20  11  29  125.92   27.71
  19 -12 -29  249.58   35.12
 -19  12  29  269.19   34.37
  18 -13 -29   -7.45    7.16
 -18  13  29    7.02   12.11
  17 -14 -29   89.56   23.83
 -17  14  29   71.62   21.47
  16 -15 -29   12.71   12.49
 -16  15  29    4.94   12.93
  15 -16 -29   -1.59    9.31
 -15  16  29   22.49   15.11
  14 -17 -29   73.90   20.29
 -14  17  29   81.32   22.54
  13 -18 -29    0.67    9.71
 -13  18  29    4.25   10.88
 -12  19  29  247.70   34.10
  11 -20 -29   87.16   21.60
 -11  20  29   98.02   24.06
  10 -21 -29  135.70   25.07
 -10  21  29  191.66   30.64
   9 -22 -29    8.27    9.54
  -9  22  29   18.72   14.04
   8 -23 -29    6.49    9.37
  -8  23  29   29.28   17.53
  25  -5 -28   77.35   24.87
 -25   5  28   71.22   22.75
  24  -6 -28    7.31   12.53
 -24   6  28   12.47   13.34
  23  -7 -28  179.50   34.72
 -23   7  28  130.93   27.35
  22  -8 -28  197.40   32.03
 -22   8  28  257.65   34.45
  21  -9 -28   11.26   12.18
 -21   9  28   16.72   12.75
  20 -10 -28   94.71   24.43
 -20  10  28   83.97   22.68
  19 -11 -28    2.08   10.86
 -19  11  28   -3.10   10.30
  18 -12 -28   12.42   11.14
 -18  12  28    6.86   10.85
  17 -13 -28   71.81   21.40
 -17  13  28  137.30   27.02
  16 -14 -28   54.05   17.76
 -16  14  28   35.13   15.75
 -15  15  28   -2.04    9.06
  14 -16 -28   25.96   14.22
 -14  16  28   64.02   20.17
  13 -17 -28  164.16   26.40
 -13  17  28   98.50   23.43
  12 -18 -28   14.93   12.15
 -12  18  28   -8.60    6.30
  11 -19 -28   18.10   12.35
 -11  19  28   -1.73    7.50
  10 -20 -28   89.12   21.58
 -10  20  28  108.05   25.51
   9 -21 -28   17.53   12.55
  -9  21  28   29.52   15.46
   8 -22 -28  150.16   23.42
  -8  22  28  172.65   32.19
   7 -23 -28  118.68   23.24
  -7  23  28   83.15   19.49
  -7  23  28   97.21   24.81
  -6  24  28    2.70   10.29
  -6  24  28    9.68   10.43
  -5  25  28   55.44   18.88
  -5  25  28   92.32   20.95
  26  -3 -27   75.11   23.74
 -26   3  27   60.78   20.62
  25  -4 -27  111.47   28.30
 -25   4  27   88.64   24.69
  24  -5 -27   13.95   13.45
 -24   5  27   -3.22    8.52
  23  -6 -27   52.63   19.84
 -23   6  27   45.91   16.55
  22  -7 -27    7.56   11.98
 -22   7  27   61.27   20.43
  21  -8 -27   -4.72    7.96
 -21   8  27    4.45    9.16
  20  -9 -27   14.63   13.72
 -20   9  27   46.10   18.28
  19 -10 -27  105.92   25.21
 -19  10  27   74.57   22.04
  18 -11 -27  310.63   36.66
 -18  11  27  256.32   32.77
 -17  12  27  125.93   27.02
  16 -13 -27   18.57   12.51
 -16  13  27    4.01    9.71
  15 -14 -27   21.95   13.13
 -15  14  27   16.42   11.21
  14 -15 -27   44.69   17.12
 -14  15  27   17.37   12.33
  13 -16 -27    8.06    9.60
 -13  16  27   -3.06    5.87
  12 -17 -27  123.79   24.51
 -12  17  27  110.57   24.13
  11 -18 -27  259.86   31.04
 -11  18  27  295.77   35.13
  10 -19 -27   65.94   17.79
 -10  19  27   93.86   23.04
   9 -20 -27   23.38   11.61
  -9  20  27    0.11    8.72
   8 -21 -27   -7.58    5.99
  -8  21  27   -8.43    7.02
   7 -22 -27   44.54   15.01
  -7  22  27   23.33   13.69
   6 -23 -27   37.98   13.85
  -6  23  27   27.70   14.72
  -6  23  27   53.74   16.97
  -5  24  27   25.47   14.59
  -5  24  27    9.79    9.55
  -4  25  27   76.00   17.40
  -4  25  27   41.82   18.24
  -3  26  27   46.43   19.38
  -3  26  27   54.88   14.96
  27  -1 -26   51.97   21.56
 -27   1  26   27.76   16.24
  26  -2 -26   -3.82    9.65
 -26   2  26   -8.33    7.94
  25  -3 -26   56.18   21.61
 -25   3  26   39.52   16.85
  24  -4 -26   41.08   18.69
 -24   4  26  101.41   24.71
  23  -5 -26   38.46   17.83
 -23   5  26   63.36   19.70
  22  -6 -26    6.02   11.54
 -22   6  26   41.46   16.51
  21  -7 -26    6.53   10.71
 -21   7  26   31.14   15.17
  20  -8 -26   33.44   15.82
 -20   8  26   45.33   16.19
  19  -9 -26   35.73   19.45
 -19   9  26   25.73   14.09
  18 -10 -26    3.08    9.38
 -18  10  26   20.96   13.39
  17 -11 -26   14.12   12.16
 -17  11  26   16.40   11.26
  16 -12 -26  166.16   26.46
 -16  12  26  102.34   23.44
  15 -13 -26    6.60    9.42
 -15  13  26   -3.17    6.37
  14 -14 -26   -4.79    5.85
 -14  14  26   -2.62    7.67
  13 -15 -26   -3.22    6.04
 -13  15  26    2.08    8.68
  12 -16 -26  154.08   24.44
 -12  16  26  115.47   25.14
  11 -17 -26   -1.12    6.25
 -11  17  26   17.12   13.43
  10 -18 -26    2.81    8.73
 -10  18  26   31.78   13.98
   9 -19 -26   42.85   13.77
  -9  19  26   32.68   15.24
   8 -20 -26   47.24   15.91
  -8  20  26   23.43   12.93
   7 -21 -26   12.23    3.59
   7 -21 -26   26.23   11.82
  -7  21  26   11.90   11.25
   6 -22 -26   33.49   12.60
   6 -22 -26   20.35    5.77
  -6  22  26   48.56   17.11
   5 -23 -26   26.01    7.74
  -5  23  26   30.79   13.37
  -5  23  26   26.94   14.86
   4 -24 -26   97.28   13.69
  -4  24  26   61.39   19.49
  -4  24  26   81.84   18.89
   3 -25 -26   26.33    9.26
  -3  25  26   31.13   13.01
  -3  25  26   36.87   16.19
   2 -26 -26    7.23    7.17
  -2  26  26   -0.97    6.59
  -2  26  26   -0.11    7.58
   1 -27 -26   56.92   16.70
  -1  27  26   58.11   14.56
  -1  27  26   25.30   15.40
  28   1 -25   21.39   15.81
 -28  -1  25   -0.13    9.93
  27   0 -25   14.99   14.32
 -27   0  25   17.45   13.13
  26  -1 -25  127.07   28.84
 -26   1  25  160.12   31.99
  25  -2 -25  213.62   32.92
 -25   2  25  220.85   31.54
  24  -3 -25   37.05   17.76
 -24   3  25    7.99   11.01
  23  -4 -25   84.12   24.54
 -23   4  25  104.37   24.54
  22  -5 -25   -4.00    7.68
 -22   5  25   -4.46    8.12
  21  -6 -25   25.64   14.60
 -21   6  25   55.06   19.28
  20  -7 -25   97.42   28.10
 -20   7  25   65.68   19.10
  19  -8 -25    1.50    9.45
 -19   8  25    1.46   13.72
  18  -9 -25   82.61   22.28
 -18   9  25   82.38   21.22
  17 -10 -25   55.26   17.52
 -17  10  25   66.48   18.63
  16 -11 -25   54.44   17.33
 -16  11  25   33.22   14.58
  15 -12 -25  209.36   28.12
 -15  12  25  163.35   24.78
  14 -13 -25   55.04   17.37
 -14  13  25   31.08   13.30
  13 -14 -25   62.81   18.09
 -13  14  25   59.14   19.22
  12 -15 -25  233.58   28.29
 -12  15  25  254.23   30.87
  11 -16 -25   30.84   12.82
 -11  16  25   24.88   13.22
  10 -17 -25   47.62   15.27
 -10  17  25   23.88   13.48
   9 -18 -25   63.71   17.45
  -9  18  25   51.11   19.32
   8 -19 -25    3.92    7.38
  -8  19  25   35.81   17.97
   7 -20 -25   75.59    7.62
   7 -20 -25   76.33   17.46
   7 -20 -25   87.40    7.96
  -7  20  25   95.82   22.15
   6 -21 -25   52.71    9.03
   6 -21 -25   42.12    7.94
   6 -21 -25   53.39   15.01
  -6  21  25   74.63   19.73
   5 -22 -25    4.94    8.05
   5 -22 -25   -2.24    3.48
  -5  22  25    0.57    8.76
  -5  22  25    5.73    8.32
   4 -23 -25   92.16   13.07
  -4  23  25   95.77   23.19
  -4  23  25   61.21   15.69
   3 -24 -25   22.90    8.22
  -3  24  25   34.65   12.06
  -3  24  25   62.09   18.95
   2 -25 -25  183.72   20.40
  -2  25  25  139.12   27.17
  -2  25  25  197.48   22.88
   1 -26 -25  105.01   17.32
  -1  26  25   95.77   18.29
  -1  26  25  122.10   25.95
   0 -27 -25    4.59    7.72
   0  27  25   25.81   15.31
   0  27  25    0.01    9.85
   1  28  25   -0.04    9.78
  29   3 -24   61.18   22.87
 -29  -3  24  129.11   28.35
  28   2 -24    2.75   11.37
 -28  -2  24    9.24   11.62
  27   1 -24  248.67   35.84
 -27  -1  24  227.26   32.05
  26   0 -24  179.07   34.83
 -26   0  24  158.33   29.56
  25  -1 -24   68.61   21.79
 -25   1  24   36.51   16.05
  24  -2 -24    8.81   10.78
 -24   2  24    3.71    9.24
  23  -3 -24  103.26   25.46
 -23   3  24   96.72   24.17
  22  -4 -24   94.97   24.47
 -22   4  24   74.70   27.82
  21  -5 -24   48.87   17.94
 -21   5  24   71.22   19.55
  20  -6 -24    8.63   10.43
 -20   6  24   12.98    9.77
  19  -7 -24    6.26   10.36
 -19   7  24   24.92   12.68
  18  -8 -24   12.37   11.17
 -18   8  24   19.38   11.41
  17  -9 -24    8.15   10.21
 -17   9  24    6.71    8.21
  16 -10 -24   65.51   18.77
 -16  10  24   47.17   15.76
  15 -11 -24   34.49   13.43
 -15  11  24   20.56   11.69
  14 -12 -24   90.26   19.82
 -14  12  24   99.79   20.77
  13 -13 -24    7.20    8.95
 -13  13  24   -1.24    6.56
  12 -14 -24  124.15   24.17
 -12  14  24   90.85   20.13
  11 -15 -24   24.08   12.54
 -11  15  24   43.26   14.22
  10 -16 -24   49.73   14.82
 -10  16  24   55.77   16.77
   9 -17 -24   13.92    9.69
  -9  17  24   10.37   10.46
   8 -18 -24   15.39    8.98
  -8  18  24   25.59   11.73
   7 -19 -24   19.52    4.75
   7 -19 -24   15.97    4.57
   7 -19 -24   35.38   12.26
  -7  19  24   25.91   12.21
   6 -20 -24    6.38    4.49
   6 -20 -24    1.97    3.80
   6 -20 -24    4.35    7.19
  -6  20  24   -0.39    8.01
   5 -21 -24   44.35   13.48
   5 -21 -24   25.69    7.57
   5 -21 -24   37.69    8.37
   4 -22 -24  102.96   15.51
   4 -22 -24   85.14   12.56
  -4  22  24   87.31   17.56
  -4  22  24  109.34   24.63
   3 -23 -24  116.34   15.31
   3 -23 -24  123.28   23.28
  -3  23  24  134.59   26.13
  -3  23  24  111.98   20.25
   2 -24 -24   -5.07    4.37
  -2  24  24   -2.20    6.83
  -2  24  24    3.53   10.29
   1 -25 -24   63.21   14.26
  -1  25  24   43.50   16.99
   0 -26 -24  146.62   20.32
   0  26  24  152.76   19.32
   0  26  24  191.79   29.69
  -1 -27 -24  211.85   24.96
   1  27  24  230.41   21.92
   1  27  24  202.63   30.85
  -2 -28 -24   17.80   10.74
   2  28  24    2.17   10.04
   2  28  24    7.55   10.40
  -3 -29 -24   89.07   19.37
   3  29  24   87.42   25.08
  29   4 -23   40.25   19.67
 -29  -4  23   11.95   12.87
  28   3 -23   99.20   26.19
 -28  -3  23  139.96   27.79
  27   2 -23    4.62   10.38
 -27  -2  23    4.44   10.61
 -27  -2  23    3.05    5.13
  26   1 -23   51.39   20.24
 -26  -1  23   20.30    7.10
 -26  -1  23   -1.69    9.06
  25   0 -23   19.60   15.01
 -25   0  23   20.38    6.25
 -25   0  23   22.29   12.77
  24  -1 -23   71.28   20.47
  24  -1 -23   80.17    9.44
 -24   1  23   62.80   18.66
 -24   1  23   66.24    7.93
  23  -2 -23   26.61   15.22
 -23   2  23   56.94    5.75
 -23   2  23   54.56   19.42
  22  -3 -23   71.17   20.87
 -22   3  23  119.47   26.10
  21  -4 -23   19.40   12.45
 -21   4  23   46.59   15.97
  20  -5 -23  249.17   31.86
 -20   5  23  191.69   26.95
  19  -6 -23   37.47   16.24
 -19   6  23   29.03   13.86
  18  -7 -23   17.99   11.69
 -18   7  23    6.46    8.14
  17  -8 -23    1.38    8.59
 -17   8  23    6.11    8.01
  16  -9 -23    1.59    7.01
 -16   9  23    4.13    8.82
  15 -10 -23  123.00   23.82
 -15  10  23  158.07   23.51
  14 -11 -23    2.76    8.51
 -14  11  23   -5.71    5.42
  13 -12 -23  182.00   24.63
 -13  12  23  111.18   22.72
  12 -13 -23  153.83   22.73
 -12  13  23  151.97   23.12
  11 -14 -23    1.57    7.62
 -11  14  23   -8.23    4.50
  10 -15 -23   92.10   19.34
 -10  15  23  131.10   21.12
   9 -16 -23   13.31    8.90
  -9  16  23    4.10    9.34
   8 -17 -23    2.54    2.04
   8 -17 -23    1.28    1.94
   8 -17 -23   10.95    8.73
  -8  17  23    6.93    8.50
   7 -18 -23    1.43    2.68
   7 -18 -23    0.78    5.33
   7 -18 -23    2.75    2.91
  -7  18  23    2.38    8.19
   6 -19 -23   37.86    7.63
   6 -19 -23   49.48   14.47
   6 -19 -23   36.15    7.04
  -6  19  23   34.04   14.40
   5 -20 -23  194.54   16.77
   5 -20 -23  224.17   24.39
   5 -20 -23  227.43   17.77
  -5  20  23  211.46   28.07
   4 -21 -23   18.44    9.26
   4 -21 -23   48.35   10.28
   4 -21 -23   47.90   14.90
  -4  21  23   73.82   20.62
   3 -22 -23   51.03   11.96
   3 -22 -23   83.92   12.80
  -3  22  23   61.41   15.16
  -3  22  23   72.77   19.64
   2 -23 -23   50.10   12.41
   2 -23 -23   54.82   12.50
  -2  23  23   45.05   16.06
   1 -24 -23   84.43   16.00
   1 -24 -23   62.64   14.04
  -1  24  23   78.69   19.95
  -1  24  23   58.28   13.73
   0 -25 -23    3.63    7.70
   0  25  23   19.66   12.27
   0  25  23   16.25    8.21
  -1 -26 -23   -0.43    7.11
   1  26  23    4.79   10.88
   1  26  23   14.07    8.07
  -2 -27 -23    0.93    9.09
   2  27  23    6.70    6.48
   2  27  23    0.14    8.88
  -3 -28 -23  145.10   22.50
   3  28  23  135.50   17.13
   3  28  23  155.81   30.89
  -4 -29 -23   58.51   17.73
   4  29  23   42.18   18.71
  30   6 -22   56.68   20.95
 -30  -6  22   56.99   20.17
  29   5 -22    4.39   12.18
 -29  -5  22   11.07   12.18
 -29  -5  22   12.85    8.07
  28   4 -22   77.12   23.75
 -28  -4  22   82.33   22.67
 -28  -4  22   69.10   14.31
  27   3 -22   -8.58    8.09
 -27  -3  22    6.10    9.49
 -27  -3  22   10.55    7.24
  26   2 -22   23.49   15.69
 -26  -2  22   56.02   11.15
 -26  -2  22   35.24   15.25
  25   1 -22   75.46   22.60
  25   1 -22   97.51   21.84
 -25  -1  22  108.94   23.70
  24   0 -22   80.93   22.92
  24   0 -22   67.39   10.81
 -24   0  22   65.07   19.26
 -24   0  22   61.49    9.31
  23  -1 -22   51.22   17.55
 -23   1  22   88.62   21.58
 -23   1  22   73.01    8.91
  22  -2 -22   -0.69    2.72
  22  -2 -22   -7.36    6.52
 -22   2  22    4.64    9.30
 -22   2  22    0.49    2.38
  21  -3 -22  371.86   38.66
 -21   3  22  321.66   15.58
 -21   3  22  375.60   36.06
  20  -4 -22   98.81   22.43
 -20   4  22  165.62   24.19
  19  -5 -22   76.36   20.06
 -19   5  22   34.72   13.45
  18  -6 -22   77.44   19.31
 -18   6  22   66.29   17.64
  17  -7 -22   64.44   18.54
 -17   7  22   39.11   14.09
  16  -8 -22  222.55   28.03
 -16   8  22  201.74   26.03
  15  -9 -22  317.76   32.69
 -15   9  22  253.08   28.36
  14 -10 -22  133.30   24.48
 -14  10  22  115.68   21.85
  13 -11 -22   16.88   10.41
 -13  11  22    0.96    6.53
  12 -12 -22    1.86    6.80
 -12  12  22    1.37    6.85
  11 -13 -22    3.25    7.75
 -11  13  22    5.77    7.92
  10 -14 -22   97.64   19.75
 -10  14  22  118.59   22.44
   9 -15 -22  249.15   26.61
  -9  15  22  241.53   27.99
   8 -16 -22  168.03   10.00
   8 -16 -22  182.57   10.40
   8 -16 -22  139.56   20.26
  -8  16  22  216.34   26.29
   7 -17 -22   40.09   12.73
   7 -17 -22   78.78    8.03
   7 -17 -22   58.53    7.51
  -7  17  22   63.38   17.62
   6 -18 -22   82.66   10.15
   6 -18 -22   96.21   10.52
   6 -18 -22  116.54   17.82
  -6  18  22   90.41   19.75
   5 -19 -22   50.44   12.86
   5 -19 -22   34.76    7.93
   5 -19 -22   24.25    7.23
  -5  19  22   23.36   12.16
   4 -20 -22  111.22   19.92
   4 -20 -22   98.96   12.72
   4 -20 -22  114.69   13.72
  -4  20  22  100.75   21.73
   3 -21 -22  320.20   24.44
   3 -21 -22  349.29   25.82
  -3  21  22  318.75   28.61
  -3  21  22  350.93   34.87
   2 -22 -22    5.54    5.56
   2 -22 -22   -2.42    4.57
  -2  22  22    2.78    6.20
  -2  22  22    3.23    7.09
   1 -23 -22   76.24   15.01
   1 -23 -22   76.12   15.81
  -1  23  22   93.41   21.79
  -1  23  22   59.27   13.69
   0 -24 -22   58.99   13.70
   0  24  22   38.66   19.31
   0  24  22   98.56   16.84
  -1 -25 -22   74.03   16.20
   1  25  22   78.45   14.83
   1  25  22  116.78   24.19
  -2 -26 -22   23.38   10.86
   2  26  22   78.71   14.20
   2  26  22   54.78   18.60
  -3 -27 -22   10.12    9.43
   3  27  22    3.82    5.66
   3  27  22   27.28   14.31
  -4 -28 -22   63.13   17.17
   4  28  22   91.62   23.50
   4  28  22   76.85   12.29
  -5 -29 -22    8.71   10.64
   5  29  22   16.42   12.78
  -6 -30 -22   85.85   20.85
   6  30  22   56.38   20.21
  30   7 -21    0.09   12.13
 -30  -7  21   22.04   15.78
  29   6 -21   -8.55    8.08
 -29  -6  21    6.48   10.42
 -29  -6  21   18.78    9.40
  28   5 -21   28.64   16.34
 -28  -5  21   34.95   14.93
 -28  -5  21   33.25   11.32
  27   4 -21   36.88   17.53
 -27  -4  21   46.38   17.46
 -27  -4  21   26.63    9.44
  26   3 -21   -3.57    7.15
 -26  -3  21    4.82    9.71
 -26  -3  21    9.03    6.26
  25   2 -21   53.34   12.03
  25   2 -21   78.69   21.38
 -25  -2  21   56.85   11.51
 -25  -2  21   75.49   20.33
  24   1 -21  127.34   26.84
  24   1 -21   90.68   13.59
 -24  -1  21  106.16   23.15
  23   0 -21   -8.85    6.77
  23   0 -21    1.56    4.75
 -23   0  21    0.07    3.54
 -23   0  21  -11.65    5.46
  22  -1 -21  107.72   25.01
 -22   1  21   68.32    9.02
 -22   1  21   99.34   22.67
  21  -2 -21   29.71    6.79
  21  -2 -21   63.50   20.06
 -21   2  21   24.15   12.25
 -21   2  21   41.29    6.42
  20  -3 -21  112.19   23.31
  20  -3 -21  105.67    8.22
 -20   3  21   99.67    7.91
 -20   3  21  141.14   22.04
  19  -4 -21  148.14   23.18
 -19   4  21  150.06   26.60
  18  -5 -21   56.36   17.18
 -18   5  21   47.15   15.28
  17  -6 -21   22.28   12.27
 -17   6  21   11.88    9.01
  16  -7 -21  326.30   33.26
 -16   7  21  352.15   33.17
  15  -8 -21  387.20   35.71
 -15   8  21  340.64   32.39
  14  -9 -21    3.28    7.69
 -14   9  21   50.63   15.30
  13 -10 -21  370.02   33.70
 -13  10  21  333.39   31.78
  12 -11 -21   35.76   12.56
 -12  11  21   48.98   14.40
  11 -12 -21   35.11   12.46
 -11  12  21   28.87   11.80
  10 -13 -21  302.82   29.23
 -10  13  21  323.17   30.87
   9 -14 -21   45.37   13.95
  -9  14  21   33.31   12.35
   8 -15 -21  327.62   16.43
   8 -15 -21  338.70   16.72
   8 -15 -21  381.20   31.76
  -8  15  21  321.67   31.17
   7 -16 -21  265.58   26.63
   7 -16 -21  315.90   17.53
   7 -16 -21  297.68   17.56
  -7  16  21  262.70   27.97
   6 -17 -21   18.53   11.18
   6 -17 -21   26.09    6.55
  -6  17  21   -5.71    5.94
   5 -18 -21   40.48    8.50
   5 -18 -21   53.16   13.82
   5 -18 -21   58.30   10.06
  -5  18  21   75.45   18.07
   4 -19 -21  115.40   16.94
   4 -19 -21  104.63   12.90
   4 -19 -21   71.17   10.72
  -4  19  21   92.73   20.35
   3 -20 -21  108.62   13.79
   3 -20 -21  129.90   15.65
   3 -20 -21  132.12   17.90
  -3  20  21  104.25   22.50
   2 -21 -21   45.63   11.02
   2 -21 -21   34.27    9.84
  -2  21  21   48.59   12.50
  -2  21  21   31.79   12.94
   1 -22 -21   68.90   13.83
   1 -22 -21   77.61   15.02
  -1  22  21  102.61   16.07
  -1  22  21   85.07   19.74
   0 -23 -21   -0.37    5.57
   0 -23 -21    0.71    5.44
   0  23  21   -5.23    4.64
   0  23  21   -8.92    6.20
  -1 -24 -21  108.02   17.72
   1  24  21  132.28   25.36
   1  24  21   88.93   14.30
  -2 -25 -21   75.79   17.21
   2  25  21   92.37   26.21
   2  25  21   74.19   14.38
  -3 -26 -21    2.65    7.41
   3  26  21    3.47    9.57
   3  26  21    6.61    6.49
  -4 -27 -21   27.51   12.06
   4  27  21   32.38   14.81
   4  27  21   43.74   10.05
  -5 -28 -21   19.33   11.51
   5  28  21    4.15   10.62
   5  28  21   22.68    7.18
  -6 -29 -21   15.44   11.31
   6  29  21   23.03   14.38
  -7 -30 -21    7.65   11.09
   7  30  21   12.14   11.65
  31   9 -20  100.51   27.67
 -31  -9  20   53.20   19.80
 -31  -9  20   72.01   17.34
  30   8 -20  142.78   30.71
 -30  -8  20  162.87   30.80
 -30  -8  20  181.93   23.60
  29   7 -20   26.43   14.69
 -29  -7  20   17.77    9.70
 -29  -7  20    1.69    9.10
  28   6 -20    6.36   11.33
 -28  -6  20   34.45   15.90
 -28  -6  20    3.78    7.52
  27   5 -20    5.61   11.16
 -27  -5  20    2.28    6.19
 -27  -5  20    3.51    8.65
  26   4 -20   52.32   14.11
  26   4 -20   93.80   23.99
 -26  -4  20   57.38   13.02
  25   3 -20  298.37   41.75
  25   3 -20  291.75   26.06
 -25  -3  20  261.00   31.50
 -25  -3  20  266.88   22.84
  24   2 -20    2.00    9.65
  24   2 -20   24.85    9.08
 -24  -2  20   46.83   15.68
 -24  -2  20   13.37    6.94
  23   1 -20  147.58   28.27
  23   1 -20  142.41   16.08
 -23  -1  20  151.56   15.57
 -23  -1  20  135.26   26.22
  22   0 -20    2.02    4.57
  22   0 -20    2.67    8.18
 -22   0  20    3.82    3.97
 -22   0  20   -3.87    6.18
  21  -1 -20  106.02   11.77
  21  -1 -20   81.09   21.18
 -21   1  20   98.95   10.63
 -21   1  20   83.37   19.24
  20  -2 -20    3.48    3.41
  20  -2 -20   -4.32    7.29
 -20   2  20   -2.99    6.37
 -20   2  20    1.01    2.83
  19  -3 -20  116.98    9.66
  19  -3 -20  136.13   25.36
 -19   3  20  137.96   25.30
 -19   3  20  138.98   10.01
  18  -4 -20   72.03   18.43
  18  -4 -20   65.11    4.80
 -18   4  20   90.89   19.50
 -18   4  20   82.48    5.94
  17  -5 -20  307.35   31.95
 -17   5  20  318.08   31.23
  16  -6 -20  131.47   21.37
 -16   6  20  142.48   20.52
  15  -7 -20    5.98    8.62
 -15   7  20   11.07    8.37
  14  -8 -20  163.31   22.45
 -14   8  20  203.63   24.37
  13  -9 -20  102.65   19.96
 -13   9  20  150.28   20.63
  12 -10 -20   -2.98    5.44
 -12  10  20   -3.83    6.49
  11 -11 -20    1.13    5.35
 -11  11  20    1.95    5.59
  10 -12 -20    3.94    6.28
 -10  12  20   19.05    9.53
   9 -13 -20   92.38   17.57
  -9  13  20  115.62   18.31
   8 -14 -20  187.05   10.95
   8 -14 -20  194.97   11.22
  -8  14  20  150.99   21.32
   7 -15 -20    9.23    7.42
   7 -15 -20    9.18    4.09
   7 -15 -20   13.16    4.28
  -7  15  20   13.08    8.90
   6 -16 -20  121.14   11.52
   6 -16 -20  115.43   17.37
   6 -16 -20  134.23   11.49
  -6  16  20  163.31   21.77
   5 -17 -20  258.39   19.08
   5 -17 -20  271.88   18.75
   5 -17 -20  296.59   26.16
  -5  17  20  241.35   26.69
   4 -18 -20   71.34   10.90
   4 -18 -20   74.91   14.96
   4 -18 -20   68.75   10.10
  -4  18  20   91.90   19.84
   3 -19 -20  127.62   16.97
   3 -19 -20  116.84   13.66
   3 -19 -20  143.38   15.40
  -3  19  20  162.48   22.68
   2 -20 -20    0.37    4.27
   2 -20 -20   -0.27    4.86
  -2  20  20   -3.74    5.38
  -2  20  20    0.30    5.21
   1 -21 -20   85.64   13.58
   1 -21 -20  111.04   15.42
  -1  21  20   98.22   15.36
  -1  21  20  107.13   22.55
   0 -22 -20    4.69    6.18
   0 -22 -20    2.88    6.12
   0  22  20   -1.60    7.17
   0  22  20    1.26    4.57
  -1 -23 -20  127.70   18.64
  -1 -23 -20  150.62   19.51
   1  23  20  159.85   17.96
   1  23  20  154.37   23.28
  -2 -24 -20   18.20    9.16
   2  24  20    9.32    9.98
   2  24  20   21.87    9.11
  -3 -25 -20  215.08   25.13
   3  25  20  254.57   21.28
   3  25  20  220.07   28.71
  -4 -26 -20   66.41   18.11
   4  26  20   63.61   19.06
   4  26  20   28.33    8.26
  -5 -27 -20   -2.96    6.71
   5  27  20   -2.96    3.96
   5  27  20   14.67   11.62
  -6 -28 -20   23.09   12.57
   6  28  20    9.18   10.89
   6  28  20   15.45    6.19
  -7 -29 -20    6.11   10.30
   7  29  20    5.31   10.23
  -8 -30 -20   98.39   22.42
   8  30  20  167.67   31.51
  -9 -31 -20   60.68   19.08
   9  31  20  101.32   25.59
  31  10 -19  121.77   28.84
 -31 -10  19   91.04   24.11
 -31 -10  19   94.50   20.09
  30   9 -19   22.65   14.32
 -30  -9  19   51.26   19.59
 -30  -9  19   38.83   13.95
  29   8 -19   44.29   19.91
 -29  -8  19   44.96   17.16
 -29  -8  19   50.50   15.14
  28   7 -19    8.89   12.12
 -28  -7  19   19.68   10.24
 -28  -7  19   18.95   13.79
  27   6 -19    9.65   11.50
 -27  -6  19   28.64   10.90
 -27  -6  19   53.71   17.47
  26   5 -19   64.03   33.31
  26   5 -19   83.79   17.90
 -26  -5  19   95.46   15.46
 -26  -5  19   68.13   19.33
  25   4 -19   33.06   11.59
  25   4 -19   31.99   15.28
 -25  -4  19   13.04   10.54
 -25  -4  19   35.84   10.58
  24   3 -19  209.40   21.56
  24   3 -19  199.65   28.71
 -24  -3  19  255.40   29.67
 -24  -3  19  223.33   20.62
  23   2 -19  109.41   24.39
  23   2 -19  119.47   15.86
 -23  -2  19  129.80   15.02
 -23  -2  19  143.03   22.61
  22   1 -19   76.03   20.38
  22   1 -19   96.79   13.21
 -22  -1  19  102.21   21.26
 -22  -1  19  106.23   12.71
  21   0 -19   83.31   11.74
  21   0 -19   96.20   21.47
 -21   0  19  145.51   21.01
 -21   0  19  106.91   11.97
  20  -1 -19   84.31   20.26
  20  -1 -19   88.38   10.89
 -20   1  19   68.32    9.14
 -20   1  19   82.99   19.18
  19  -2 -19  257.72   17.47
  19  -2 -19  276.77   30.89
 -19   2  19  238.30   15.84
 -19   2  19  282.93   29.21
  18  -3 -19  365.56   35.32
  18  -3 -19  382.93   20.39
 -18   3  19  362.33   19.27
 -18   3  19  393.56   34.27
  17  -4 -19   28.94   12.00
  17  -4 -19   29.04    4.27
 -17   4  19   37.42   12.92
 -17   4  19   36.79    4.44
  16  -5 -19  361.17   33.64
 -16   5  19  365.19   32.32
  15  -6 -19  193.80   24.18
 -15   6  19  221.19   24.62
  14  -7 -19   44.54   13.95
 -14   7  19   42.10   13.32
  13  -8 -19  125.65   19.25
 -13   8  19  150.34   20.25
  12  -9 -19  491.88   37.84
 -12   9  19  428.10   34.73
  11 -10 -19   83.75   17.03
 -11  10  19   76.82   16.94
 -10  11  19   60.90   14.78
   9 -12 -19  410.23   32.72
  -9  12  19  394.04   32.59
   8 -13 -19  152.59   19.04
   8 -13 -19  125.37    8.83
   8 -13 -19  151.05    9.07
  -8  13  19  182.58   22.27
   7 -14 -19   42.39    5.99
   7 -14 -19   45.15    6.43
   7 -14 -19   75.38   15.26
  -7  14  19   57.05   13.97
   6 -15 -19  249.19   23.48
   6 -15 -19  198.85   14.90
   6 -15 -19  211.55   14.65
  -6  15  19  207.20   23.99
   5 -16 -19  419.94   30.79
   5 -16 -19  363.00   22.31
   5 -16 -19  374.45   23.23
  -5  16  19  361.67   32.12
   4 -17 -19   27.72    9.77
   4 -17 -19   28.29    7.12
   4 -17 -19   28.66    7.32
  -4  17  19   26.11   10.83
   3 -18 -19  347.61   24.37
   3 -18 -19  367.85   28.69
   3 -18 -19  398.70   26.38
  -3  18  19  357.63   32.74
   2 -19 -19  257.13   21.23
   2 -19 -19  257.97   23.53
   2 -19 -19  297.95   23.39
  -2  19  19  319.26   26.68
  -2  19  19  338.61   31.91
   1 -20 -19   77.36   12.68
   1 -20 -19   82.38   13.52
  -1  20  19   90.14   14.29
  -1  20  19   61.53   15.97
   0 -21 -19   93.47   14.86
   0 -21 -19   71.46   16.04
   0  21  19  101.64   21.16
   0  21  19  116.32   15.55
  -1 -22 -19   97.67   15.38
  -1 -22 -19   92.46   17.15
   1  22  19   75.83   18.20
   1  22  19  126.66   15.63
  -2 -23 -19  142.90   19.73
   2  23  19  131.08   24.25
   2  23  19   86.20   13.47
  -3 -24 -19  173.14   22.68
   3  24  19  228.05   28.79
   3  24  19  238.25   20.43
  -4 -25 -19   23.75   11.14
   4  25  19   22.87   13.06
   4  25  19   39.34    9.44
  -5 -26 -19   88.53   20.74
   5  26  19   68.16   11.09
   5  26  19   74.32   32.56
  -6 -27 -19   12.17   10.30
   6  27  19   10.35   10.59
   6  27  19   16.18    6.17
  -7 -28 -19   14.52   11.48
   7  28  19   27.05    6.91
   7  28  19   43.66   17.57
  -8 -29 -19   43.22   15.15
   8  29  19   64.29   20.67
  -9 -30 -19   15.65   12.64
   9  30  19   29.37   14.41
 -10 -31 -19  153.21   35.06
  10  31  19  107.94   26.46
  31  11 -18   17.64   13.32
 -31 -11  18   35.29   16.31
 -31 -11  18   40.44   15.49
  30  10 -18   57.70   21.78
 -30 -10  18   96.79   20.28
 -30 -10  18  126.12   27.10
  29   9 -18   74.48   23.28
 -29  -9  18   85.77   22.38
 -29  -9  18   93.80   19.44
  28   8 -18   20.28   13.63
 -28  -8  18   -0.96    6.20
 -28  -8  18   -4.73    7.27
  27   7 -18   15.08   12.49
 -27  -7  18    5.29    7.42
  26   6 -18   48.85   17.89
 -26  -6  18   21.80   12.09
 -26  -6  18   21.98    9.39
  25   5 -18   11.48   10.36
  25   5 -18   49.05   13.75
 -25  -5  18   57.51   17.19
 -25  -5  18   76.98   15.22
  24   4 -18  569.91   48.63
 -24  -4  18  528.30   34.69
 -24  -4  18  543.19   44.29
  23   3 -18   46.35   16.89
  23   3 -18   26.14    9.95
 -23  -3  18   30.19    9.22
 -23  -3  18   37.43   14.46
  22   2 -18  248.06   22.27
  22   2 -18  283.38   31.80
 -22  -2  18  307.07   30.93
 -22  -2  18  249.35   20.79
  21   1 -18   51.24   16.40
  21   1 -18   78.25   13.27
 -21  -1  18   78.52   10.97
 -21  -1  18   81.38   18.31
  20   0 -18 1196.24   70.86
  20   0 -18 1124.92   54.49
 -20   0  18 1075.27   65.47
 -20   0  18 1173.99   52.83
  19  -1 -18  188.92   25.19
  19  -1 -18  197.02   16.41
 -19   1  18  198.42   15.37
 -19   1  18  235.09   25.97
  18  -2 -18   10.81    9.26
  18  -2 -18    2.16    3.28
 -18   2  18    3.28    3.07
 -18   2  18    7.60    8.12
  17  -3 -18   18.04   10.72
  17  -3 -18   11.89    4.17
 -17   3  18    9.37    8.49
 -17   3  18    9.67    3.42
  16  -4 -18  386.95   33.31
  16  -4 -18  303.13   15.97
 -16   4  18  309.69   28.94
 -16   4  18  316.04   15.82
  15  -5 -18   59.85   14.89
 -15   5  18   56.36   14.47
  14  -6 -18  268.02   27.36
 -14   6  18  222.07   23.88
  13  -7 -18  439.83   35.29
 -13   7  18  544.55   39.01
  12  -8 -18  217.53   24.35
 -12   8  18  294.75   27.54
  11  -9 -18  295.76   27.69
 -11   9  18  297.77   27.56
  10 -10 -18    5.00    5.73
 -10  10  18   -4.73    4.02
   9 -11 -18  325.27   28.10
  -9  11  18  337.69   29.18
   8 -12 -18  240.40   23.79
   8 -12 -18  258.85   13.30
   8 -12 -18  274.76   13.84
  -8  12  18  303.88   27.74
   7 -13 -18  492.61   24.80
   7 -13 -18  505.33   35.64
   7 -13 -18  549.69   24.89
  -7  13  18  576.77   40.61
   6 -14 -18  226.99   14.84
   6 -14 -18  223.87   15.28
   6 -14 -18  232.28   22.52
  -6  14  18  220.33   23.81
   5 -15 -18   49.19    8.03
   5 -15 -18   80.33   14.84
  -5  15  18   76.02   16.54
   4 -16 -18  291.92   20.60
   4 -16 -18  295.31   20.01
   4 -16 -18  304.29   25.31
  -4  16  18  331.75   29.60
   3 -17 -18   10.11    6.54
   3 -17 -18   20.90    7.25
   3 -17 -18    0.92    3.82
  -3  17  18    8.68    8.39
   2 -18 -18    5.15    4.69
   2 -18 -18   -2.39    3.88
   2 -18 -18    2.82    4.39
  -2  18  18    0.64    6.11
   1 -19 -18  171.46   17.44
   1 -19 -18  190.45   19.00
  -1  19  18  184.87   23.50
  -1  19  18  213.98   20.57
   0 -20 -18 1115.64   57.96
   0 -20 -18 1167.58   59.85
   0  20  18 1257.32   68.73
   0  20  18 1086.67   57.67
  -1 -21 -18   63.03   13.31
  -1 -21 -18   72.14   15.18
   1  21  18   97.72   19.64
   1  21  18   78.38   12.77
  -2 -22 -18  267.41   25.45
  -2 -22 -18  214.24   22.60
   2  22  18  286.72   29.80
   2  22  18  209.74   19.59
  -3 -23 -18   20.80   10.55
   3  23  18   34.45    9.42
   3  23  18   35.96   13.32
  -4 -24 -18  569.62   42.20
   4  24  18  539.31   31.97
   4  24  18  525.12   31.75
   4  24  18  512.80   43.14
  -5 -25 -18   66.35   16.66
   5  25  18   32.89   13.48
   5  25  18   61.23   11.37
   5  25  18   53.77   15.54
  -6 -26 -18   33.59   13.08
   6  26  18   21.24   12.15
   6  26  18   29.45    7.76
  -7 -27 -18   19.42   11.59
   7  27  18   26.70   13.40
   7  27  18   25.49    7.08
  -8 -28 -18    3.55    8.26
   8  28  18   -3.04    7.78
   8  28  18    3.87    4.83
  -9 -29 -18   81.87   21.90
   9  29  18   54.20   18.37
 -10 -30 -18  132.74   26.95
  10  30  18  106.83   25.43
 -11 -31 -18    2.93   15.15
  11  31  18   23.03   15.18
  31  12 -17   94.86   25.86
 -31 -12  17   45.10   18.69
 -31 -12  17   66.49   18.03
  30  11 -17   53.30   19.56
 -30 -11  17  105.35   21.78
 -30 -11  17   95.55   24.75
  29  10 -17   71.78   22.97
 -29 -10  17   45.08   16.66
 -29 -10  17   58.22   16.23
  28   9 -17    5.11   11.06
 -28  -9  17   11.62    8.72
 -28  -9  17   -5.08    8.20
  27   8 -17  122.33   42.88
 -27  -8  17   90.51   18.42
 -27  -8  17   94.10   22.83
  26   7 -17   36.77   15.51
 -26  -7  17   74.78   15.36
 -26  -7  17   58.86   17.72
  25   6 -17  103.12   24.13
  25   6 -17   48.06   14.61
 -25  -6  17  106.33   18.20
 -25  -6  17   46.59   16.27
  24   5 -17   22.97   10.71
  24   5 -17   56.25   18.30
 -24  -5  17   25.70    9.51
 -24  -5  17    5.58    9.80
  23   4 -17    0.58    8.38
  23   4 -17    5.60    6.87
 -23  -4  17    2.46    5.27
 -23  -4  17    3.06    7.66
  22   3 -17   73.12   14.25
  22   3 -17   89.77   20.04
 -22  -3  17   95.77   20.56
 -22  -3  17  102.56   13.69
  21   2 -17  260.86   30.56
  21   2 -17  268.44   22.58
 -21  -2  17  271.83   28.77
  20   1 -17  121.54   14.37
  20   1 -17  133.95   24.29
 -20  -1  17  132.56   19.58
 -20  -1  17  120.61   13.21
  19   0 -17   83.23   18.74
  19   0 -17  105.67   12.46
 -19   0  17  113.73   20.61
 -19   0  17   88.42   10.65
  18  -1 -17  308.16   31.09
 -18   1  17  294.33   18.97
 -18   1  17  299.62   28.19
  17  -2 -17  501.85   27.55
  17  -2 -17  637.17   43.81
 -17   2  17  527.96   27.06
 -17   2  17  562.17   39.90
  16  -3 -17   12.23    9.33
  16  -3 -17   24.52    5.31
 -16   3  17   21.34    4.63
 -16   3  17   39.90   12.18
  15  -4 -17   14.77    8.44
  15  -4 -17   20.06    4.04
 -15   4  17   43.60   13.00
  14  -5 -17  113.98   17.84
  14  -5 -17  128.65    7.10
 -14   5  17  122.98    7.19
 -14   5  17  175.27   20.44
 -13   6  17  199.68   21.93
  12  -7 -17   12.49    8.51
 -12   7  17   20.18    9.24
  11  -8 -17   36.14   11.47
 -11   8  17   41.75   11.81
  10  -9 -17  264.43   24.75
 -10   9  17  310.76   28.57
   9 -10 -17  299.74   26.25
  -9  10  17  311.19   27.60
   8 -11 -17   63.77   13.50
   8 -11 -17   41.76    4.42
   8 -11 -17   54.62    5.03
  -8  11  17   52.66   13.01
   7 -12 -17   20.52    4.29
   7 -12 -17   27.00    8.97
   7 -12 -17   15.08    4.01
  -7  12  17    5.03    5.79
   6 -13 -17  183.96   13.25
   6 -13 -17  184.85   12.79
   6 -13 -17  211.69   20.50
  -6  13  17  158.91   19.43
   5 -14 -17  124.66   11.61
   5 -14 -17  123.33   15.78
   5 -14 -17  128.99   11.30
  -5  14  17  121.92   17.56
   4 -15 -17   16.03    5.63
   4 -15 -17   11.06    4.67
   4 -15 -17    8.71    5.74
  -4  15  17   21.30    9.41
   3 -16 -17   17.41    5.97
   3 -16 -17   14.68    6.53
   3 -16 -17   13.34    6.70
  -3  16  17   34.05   11.44
   2 -17 -17  554.36   33.37
   2 -17 -17  574.14   32.84
   2 -17 -17  554.68   35.09
  -2  17  17  537.49   39.11
   1 -18 -17  292.84   23.52
   1 -18 -17  285.45   27.32
   1 -18 -17  276.71   22.07
  -1  18  17  268.70   23.12
  -1  18  17  351.83   30.17
   0 -19 -17   73.15   12.15
   0 -19 -17   72.02   13.72
   0  19  17   96.67   14.03
   0  19  17  106.47   20.28
  -1 -20 -17  126.38   16.63
  -1 -20 -17   95.80   14.93
   1  20  17  108.77   14.24
   1  20  17  101.58   19.58
  -2 -21 -17  258.51   24.80
  -2 -21 -17  243.16   23.31
   2  21  17  280.90   21.60
   2  21  17  209.08   25.25
   2  21  17  239.19   20.33
  -3 -22 -17   97.98   18.25
  -3 -22 -17   84.50   17.22
   3  22  17   99.40   12.92
   3  22  17   87.34   12.13
   3  22  17   73.34   17.03
   3  22  17   51.00   15.30
  -4 -23 -17    0.35    5.73
   4  23  17    6.86    5.60
   4  23  17    0.61    6.34
   4  23  17    4.89    5.15
  -5 -24 -17   20.09   10.27
   5  24  17    8.57    5.47
   5  24  17   15.07    6.24
   5  24  17   19.04   10.80
  -6 -25 -17   65.75   16.90
   6  25  17   61.52    9.90
   6  25  17   91.27   19.96
   6  25  17   49.41    9.74
  -7 -26 -17   41.50   15.22
   7  26  17   71.71   19.78
   7  26  17   42.41    8.66
  -8 -27 -17   42.00   15.49
   8  27  17   67.53    9.25
  -9 -28 -17    8.13   10.59
   9  28  17   14.97   10.64
 -10 -29 -17  102.66   23.21
  10  29  17  114.67   25.01
 -11 -30 -17   72.38   20.85
  11  30  17  143.37   28.17
 -12 -31 -17   91.78   24.49
  12  31  17   98.61   26.14
  31  13 -16   24.10   15.62
 -31 -13  16   42.94   18.98
 -31 -13  16    6.36   10.59
  30  12 -16  182.96   35.46
 -30 -12  16  189.05   33.54
 -30 -12  16  171.50   25.68
  29  11 -16  129.89   28.75
 -29 -11  16   81.40   22.36
 -29 -11  16   66.28   17.29
  28  10 -16   27.25   14.56
 -28 -10  16   15.48   10.46
 -28 -10  16    2.06    8.52
  27   9 -16  165.56   30.83
 -27  -9  16  175.55   22.84
 -27  -9  16  177.37   26.78
  26   8 -16   86.53   22.01
 -26  -8  16   57.61   14.29
 -26  -8  16   65.31   19.06
  25   7 -16   -0.88    8.05
 -25  -7  16    4.01    5.91
 -25  -7  16    1.33    7.97
  24   6 -16   54.99   14.73
  24   6 -16   58.71   17.95
 -24  -6  16   92.27   21.02
 -24  -6  16   64.80   14.15
  23   5 -16   36.49   13.99
  23   5 -16   23.16    9.46
 -23  -5  16   44.22   10.83
 -23  -5  16   29.89   12.78
  22   4 -16   75.62   19.47
  22   4 -16   63.70   13.91
 -22  -4  16   60.14   16.18
 -22  -4  16   63.63   12.27
  21   3 -16   83.69   13.84
  21   3 -16  101.31   21.37
 -21  -3  16  120.54   19.19
 -21  -3  16   97.05   13.05
  20   2 -16  246.47   28.39
  20   2 -16  260.12   21.70
 -20  -2  16  248.13   19.97
 -20  -2  16  266.93   27.32
  19   1 -16  493.43   30.45
  19   1 -16  486.68   39.96
 -19  -1  16  448.26   35.87
 -19  -1  16  469.32   27.94
  18   0 -16   66.47   16.43
  18   0 -16   78.33   10.75
 -18   0  16   52.51   13.63
 -18   0  16   59.95    8.79
  17  -1 -16   68.76   16.72
  17  -1 -16   66.48    9.33
 -17   1  16   73.45   15.66
 -17   1  16   60.88    8.30
  16  -2 -16   -0.98    5.32
  16  -2 -16    1.69    2.95
 -16   2  16    0.46    2.18
 -16   2  16   -5.25    3.47
  15  -3 -16   70.44   16.31
  15  -3 -16   44.29    6.19
 -15   3  16   39.81   12.59
 -15   3  16   50.90    6.16
  14  -4 -16  242.32   29.62
  14  -4 -16  264.26   14.30
 -14   4  16  273.60   14.28
  13  -5 -16  138.62    7.84
  13  -5 -16  131.42   18.03
 -13   5  16  158.40   19.10
 -13   5  16  140.80    7.98
  12  -6 -16  392.93   31.26
 -12   6  16  416.51   31.48
  11  -7 -16  112.98   16.56
 -11   7  16   98.26   14.81
  10  -8 -16  371.82   29.55
 -10   8  16  347.50   28.08
   9  -9 -16    2.78    4.69
  -9   9  16   -1.54    4.11
   8 -10 -16  319.38   14.80
   8 -10 -16  333.64   15.32
   8 -10 -16  299.74   25.54
  -8  10  16  396.65   30.41
   7 -11 -16  105.00    8.25
   7 -11 -16   98.58    7.67
   7 -11 -16  106.03   14.84
  -7  11  16   61.57   12.83
   6 -12 -16  411.17   21.16
   6 -12 -16  428.32   22.06
   6 -12 -16  398.79   29.39
  -6  12  16  452.32   33.18
   5 -13 -16  130.98   10.84
   5 -13 -16  139.90   16.24
   5 -13 -16  128.88   11.56
  -5  13  16  158.08   19.76
   4 -14 -16  280.96   19.12
   4 -14 -16  276.02   23.01
  -4  14  16  228.22   25.13
   3 -15 -16   47.89    8.77
   3 -15 -16   54.51    9.03
   3 -15 -16   50.91   11.48
  -3  15  16   31.87   10.40
   2 -16 -16    3.98    4.27
   2 -16 -16    1.78    3.63
   2 -16 -16   -0.29    4.35
  -2  16  16    2.33    5.38
   1 -17 -16   60.91   11.47
   1 -17 -16   77.30   12.00
   1 -17 -16   51.04   10.69
  -1  17  16   70.27   12.79
  -1  17  16   73.34   15.90
   0 -18 -16   65.23   12.47
   0 -18 -16   74.29   13.73
   0  18  16   79.88   12.56
   0  18  16   61.48   14.42
   0  18  16   73.81   12.62
  -1 -19 -16  436.38   30.35
  -1 -19 -16  430.92   31.27
   1  19  16  468.39   30.08
   1  19  16  464.34   36.18
   1  19  16  456.83   29.24
   1  19  16  477.66   34.04
  -2 -20 -16  239.84   23.40
   2  20  16  258.50   28.03
   2  20  16  224.87   19.11
   2  20  16  240.62   19.98
   2  20  16  238.33   26.16
  -3 -21 -16   83.47   16.40
   3  21  16  118.62   19.16
   3  21  16   64.68   15.08
   3  21  16  120.17   13.61
   3  21  16  136.01   14.71
  -4 -22 -16   55.35   14.33
   4  22  16   65.31   11.30
   4  22  16   71.29   17.11
   4  22  16   68.70   10.93
  -5 -23 -16   34.27   12.01
   5  23  16   31.90    8.53
   5  23  16   25.85    7.73
   5  23  16   48.74   14.81
  -6 -24 -16   77.25   18.46
   6  24  16   77.27   10.71
   6  24  16   86.25   19.79
   6  24  16   53.79   10.09
   7  25  16    3.31    4.09
   7  25  16   -2.54    6.25
  -8 -26 -16   57.79   16.59
   8  26  16   83.84   20.76
   8  26  16   53.31    8.70
  -9 -27 -16  174.47   26.16
   9  27  16  171.80   34.04
   9  27  16  173.80   13.85
 -10 -28 -16   35.10   15.70
  10  28  16   46.00   17.29
 -11 -29 -16   81.31   20.89
  11  29  16  143.76   28.89
 -12 -30 -16  145.60   28.55
  12  30  16  157.20   29.34
 -13 -31 -16   13.39   13.26
  13  31  16   -0.12    9.15
  31  14 -15   27.17   16.08
 -31 -14  15   55.99   18.55
 -31 -14  15   46.99   18.12
  30  13 -15  118.57   26.83
 -30 -13  15  177.35   28.60
 -30 -13  15  125.21   24.74
  29  12 -15    8.68   12.45
 -29 -12  15   -4.72    6.60
 -29 -12  15   -4.69    7.49
 -28 -11  15   96.00   20.19
 -28 -11  15  106.59   23.81
  27  10 -15   23.36   13.38
 -27 -10  15    4.39    8.58
 -27 -10  15   -5.84    7.33
  26   9 -15   72.54   19.87
 -26  -9  15   67.57   19.02
 -26  -9  15   70.22   16.94
  25   8 -15   58.55   17.68
 -25  -8  15   25.92   12.95
 -25  -8  15   45.18   13.12
  24   7 -15   13.72   10.99
  24   7 -15   -9.63    5.38
 -24  -7  15    5.26    6.79
 -24  -7  15   28.53   12.45
  23   6 -15  384.26   36.82
  23   6 -15  342.46   30.05
 -23  -6  15  393.96   30.69
 -23  -6  15  460.36   38.58
  22   5 -15  103.06   16.76
  22   5 -15   95.45   21.19
 -22  -5  15  139.59   17.02
 -22  -5  15  142.01   20.85
  21   4 -15  333.69   33.27
  21   4 -15  336.35   27.11
 -21  -4  15  307.85   30.21
 -21  -4  15  328.31   24.94
  20   3 -15  176.19   18.70
  20   3 -15  233.34   26.32
 -20  -3  15  159.82   16.48
 -20  -3  15  214.23   24.08
  19   2 -15  480.30   30.76
  19   2 -15  457.73   38.01
 -19  -2  15  540.36   38.42
 -19  -2  15  468.55   29.06
  18   1 -15   86.04   17.25
  18   1 -15   75.50   11.08
 -18  -1  15   86.60   17.16
 -18  -1  15   92.41   10.96
  17   0 -15    4.01    4.02
  17   0 -15   11.83    8.77
 -17   0  15   -4.47    4.82
 -17   0  15    0.95    3.09
  16  -1 -15    1.53    6.34
  16  -1 -15   25.82    6.61
 -16   1  15   22.76   10.70
 -16   1  15   23.76    5.76
  15  -2 -15  726.38   48.34
  15  -2 -15  689.67   33.43
 -15   2  15  667.44   43.18
 -15   2  15  719.69   32.92
  14  -3 -15   -3.20    4.72
  14  -3 -15   -0.58    2.00
 -14   3  15    0.53    5.73
 -14   3  15    3.17    2.38
  13  -4 -15  117.58   17.20
  13  -4 -15  154.47    9.77
 -13   4  15  132.29    8.74
 -13   4  15  145.43   17.84
  12  -5 -15  107.60   15.77
  12  -5 -15  100.51    6.47
 -12   5  15   82.55   13.55
 -12   5  15   99.65    6.30
  11  -6 -15   55.81   13.26
 -11   6  15   54.25   12.64
  10  -7 -15  166.72   18.87
 -10   7  15  179.45   19.37
   9  -8 -15   34.93   10.12
   9  -8 -15   30.08    2.96
  -9   8  15   31.99    9.08
   8  -9 -15   34.56    3.53
   8  -9 -15   36.34    3.79
   8  -9 -15   19.07    8.18
  -8   9  15   26.54    8.59
   7 -10 -15  172.13   10.68
   7 -10 -15  158.09   17.47
   7 -10 -15  179.94   10.31
  -7  10  15  190.18   19.47
   6 -11 -15   57.81    6.21
   6 -11 -15   56.04    6.64
   6 -11 -15   43.17   10.58
  -6  11  15   36.17   10.04
   5 -12 -15   94.03    9.37
   5 -12 -15  100.58   13.48
   5 -12 -15   92.77    8.65
  -5  12  15   97.72   14.22
   4 -13 -15  153.11   16.27
   4 -13 -15  165.26   12.82
   4 -13 -15  149.04   13.08
  -4  13  15  117.12   15.73
   3 -14 -15    2.11    4.16
   3 -14 -15    0.80    3.03
   3 -14 -15   -3.13    2.01
  -3  14  15    3.93    4.60
  -3  14  15   -0.58    4.16
   2 -15 -15  687.75   36.15
   2 -15 -15  688.19   38.80
   2 -15 -15  689.87   37.31
  -2  15  15  607.61   36.40
  -2  15  15  778.97   46.33
   1 -16 -15   16.60    6.23
   1 -16 -15    9.59    5.51
   1 -16 -15   12.90    6.08
  -1  16  15    9.49    5.31
  -1  16  15   18.40    9.28
   0 -17 -15    5.22    5.24
   0 -17 -15   -0.01    3.59
   0  17  15   -2.36    5.05
   0  17  15   -1.16    3.19
   0  17  15    5.53    4.48
   0  17  15   -0.21    4.09
  -1 -18 -15   88.58   13.72
   1  18  15   65.17   10.44
   1  18  15  102.76   15.74
   1  18  15   87.32   14.22
   1  18  15   87.92   12.38
  -2 -19 -15  478.16   33.62
   2  19  15  485.87   29.30
   2  19  15  554.58   38.31
   2  19  15  435.26   28.75
   2  19  15  474.65   34.92
  -3 -20 -15  192.59   21.27
   3  20  15  165.64   15.76
   3  20  15  184.34   21.68
   3  20  15  156.65   15.31
   3  20  15  133.79   19.82
  -4 -21 -15  318.29   28.55
   4  21  15  337.27   31.49
   4  21  15  351.63   23.76
   4  21  15  367.40   24.12
   4  21  15  358.94   32.22
  -5 -22 -15  116.02   18.32
   5  22  15  103.37   21.23
   5  22  15  117.91   12.98
   5  22  15  112.65   12.86
  -6 -23 -15  384.33   33.88
   6  23  15  371.58   24.15
   6  23  15  368.24   25.80
   6  23  15  424.31   36.44
  -7 -24 -15    0.55    6.88
   7  24  15    4.50    7.57
   7  24  15    6.39    4.58
  -8 -25 -15   81.84   19.40
   8  25  15   53.13    9.61
   8  25  15   69.15   18.98
   8  25  15   56.61    8.81
  -9 -26 -15   62.50   17.31
   9  26  15   46.67    9.07
   9  26  15   64.57    9.11
   9  26  15   68.24   18.39
 -10 -27 -15   25.91   13.50
  10  27  15    6.51    4.24
  10  27  15   21.99   12.86
 -11 -28 -15  135.86   27.89
  11  28  15  116.37   14.59
  11  28  15  150.24   27.80
 -12 -29 -15   13.25   12.11
  12  29  15    3.78   10.06
 -13 -30 -15  152.74   29.85
  13  30  15  175.38   28.50
 -14 -31 -15   32.84   16.38
  14  31  15    0.42   10.87
  31  15 -14   26.03   15.94
 -31 -15  14   38.64   17.79
 -31 -15  14   17.48   12.18
  30  14 -14   -5.09    7.58
 -30 -14  14   -0.24    8.82
 -30 -14  14   -1.58    8.63
  29  13 -14  119.45   26.94
 -29 -13  14  210.90   30.13
 -29 -13  14  135.06   25.57
  28  12 -14    8.54   11.31
 -28 -12  14   45.05   28.73
 -28 -12  14   34.35   13.73
  27  11 -14   14.19   11.71
 -27 -11  14    5.04    8.09
 -27 -11  14   17.36   12.79
  26  10 -14   80.59   20.98
 -26 -10  14   65.80   17.89
 -26 -10  14   71.04   17.34
  25   9 -14   21.13   12.44
 -25  -9  14   31.84   13.46
 -25  -9  14   36.90   12.11
  24   8 -14  128.53   24.44
 -24  -8  14  148.20   19.37
 -24  -8  14  173.31   24.18
  23   7 -14  225.23   24.50
  23   7 -14  176.87   25.14
 -23  -7  14  182.05   20.58
 -23  -7  14  148.47   22.50
  22   6 -14   -5.42    5.65
  22   6 -14   -4.36    4.57
 -22  -6  14    4.92    5.67
 -22  -6  14    5.83    7.55
  21   5 -14  628.11   41.37
  21   5 -14  752.45   50.65
 -21  -5  14  647.31   46.06
 -21  -5  14  724.74   41.68
  20   4 -14  171.39   22.88
  20   4 -14  177.17   19.00
 -20  -4  14  196.05   18.67
 -20  -4  14  213.16   23.95
  19   3 -14   58.17   15.15
  19   3 -14   63.06   12.45
 -19  -3  14   63.62   12.05
 -19  -3  14   77.35   16.07
  18   2 -14  130.96   14.73
  18   2 -14  150.44   20.69
 -18  -2  14  125.57   13.22
 -18  -2  14  121.22   17.70
  17   1 -14  239.12   18.97
  17   1 -14  260.44   25.93
 -17  -1  14  240.75   17.73
  16   0 -14  345.29   35.62
  16   0 -14  362.03   23.63
 -16   0  14  336.03   20.90
 -16   0  14  356.19   28.92
  15  -1 -14  345.94   21.03
  15  -1 -14  341.62   29.64
 -15   1  14  293.58   18.15
 -15   1  14  312.96   26.07
  14  -2 -14    0.58    2.51
  14  -2 -14   -4.78    3.94
 -14   2  14    2.99    4.90
 -14   2  14    1.65    2.10
  13  -3 -14   -2.67    3.72
  13  -3 -14    6.09    2.89
 -13   3  14    9.06    6.49
 -13   3  14    7.43    2.75
  12  -4 -14  175.18   10.42
  12  -4 -14  163.53   18.98
 -12   4  14  169.64    9.83
 -12   4  14  150.32   17.61
  11  -5 -14  123.59   16.19
  11  -5 -14  140.36    7.81
 -11   5  14  121.41   15.66
 -11   5  14  161.31    8.48
  10  -6 -14  477.58   18.81
  10  -6 -14  500.92   33.25
  10  -6 -14  462.44   19.00
 -10   6  14  523.67   34.23
   9  -7 -14   94.25   13.28
   9  -7 -14   83.92    4.62
   9  -7 -14   82.77    4.46
  -9   7  14  104.56   14.35
   8  -8 -14   -0.67    1.24
   8  -8 -14    0.50    3.80
   8  -8 -14    0.80    1.16
  -8   8  14    0.36    3.58
   7  -9 -14   86.81    6.21
   7  -9 -14   71.64   11.78
   7  -9 -14   77.34    6.32
  -7   9  14   85.57   13.15
   6 -10 -14  484.83   30.99
   6 -10 -14  463.07   22.49
   6 -10 -14  457.67   21.78
  -6  10  14  443.59   32.99
  -6  10  14  459.71   31.14
   5 -11 -14  140.11   10.49
   5 -11 -14  169.04   11.88
   5 -11 -14  117.52   14.44
  -5  11  14  143.22   14.92
  -5  11  14  134.03   16.26
   4 -12 -14  138.72   12.37
   4 -12 -14  185.46   13.03
   4 -12 -14  201.80   17.81
  -4  12  14  174.85   16.25
  -4  12  14  169.30   18.15
   3 -13 -14    3.32    3.40
   3 -13 -14    5.80    4.75
   3 -13 -14   10.70    4.70
  -3  13  14    9.41    5.24
  -3  13  14   15.23    7.19
   2 -14 -14   -2.08    3.17
   2 -14 -14   -4.54    2.52
   2 -14 -14    1.50    3.26
  -2  14  14   -3.29    3.66
  -2  14  14   -0.07    3.54
   1 -15 -14  285.80   21.43
   1 -15 -14  304.55   22.08
   1 -15 -14  280.37   20.49
  -1  15  14  287.35   21.39
  -1  15  14  332.60   26.82
   0 -16 -14  353.03   25.47
   0  16  14  321.67   22.89
   0  16  14  358.57   28.69
   0  16  14  405.09   27.51
   0  16  14  333.39   23.82
  -1 -17 -14  249.26   21.69
   1  17  14  235.53   18.30
   1  17  14  205.05   22.01
   1  17  14  228.93   21.38
   1  17  14  216.08   18.40
  -2 -18 -14  168.41   18.46
   2  18  14  149.27   18.76
   2  18  14  167.68   15.19
   2  18  14  111.50   16.24
   2  18  14  125.14   13.41
  -3 -19 -14   72.05   15.12
   3  19  14   65.70   14.50
   3  19  14   67.31   10.19
   3  19  14   70.56   10.18
   3  19  14   69.91   14.76
  -4 -20 -14  164.91   20.00
   4  20  14  161.14   16.38
   4  20  14  164.72   15.44
   4  20  14  200.46   23.02
   4  20  14  220.12   23.73
  -5 -21 -14  730.77   47.21
   5  21  14  702.53   36.38
   5  21  14  689.73   46.34
   5  21  14  620.17   45.37
  -6 -22 -14   -0.92    6.20
   6  22  14    0.16    3.71
   6  22  14    6.37    8.59
  -7 -23 -14  197.90   24.48
   7  23  14  182.38   16.96
   7  23  14  165.70   14.92
   7  23  14  183.39   23.79
  -8 -24 -14  155.24   22.56
   8  24  14  132.79   23.94
   8  24  14  120.85   12.53
   8  24  14  135.43   13.21
  -9 -25 -14   -3.84    6.92
   9  25  14   13.51    5.22
   9  25  14   33.99   13.83
   9  25  14   16.52    6.12
 -10 -26 -14   37.83   14.35
  10  26  14   62.25   17.22
  10  26  14   67.52    9.08
  10  26  14   44.10    8.27
 -11 -27 -14   22.84   11.89
  11  27  14   39.82   14.75
  11  27  14   15.43    5.34
 -12 -28 -14   12.11   11.00
  12  28  14   15.08   11.10
 -13 -29 -14  122.38   26.74
  13  29  14  134.44   27.96
  14  30  14    0.79    9.48
 -15 -31 -14   44.99   19.93
  15  31  14   44.26   17.58
  31  16 -13   10.87   11.06
 -31 -16  13   -0.93   10.48
 -31 -16  13   43.61   18.81
  30  15 -13  168.51   31.50
 -30 -15  13  130.01   28.18
 -30 -15  13  167.77   26.25
  29  14 -13  107.75   25.21
 -29 -14  13  109.67   25.55
 -29 -14  13   88.82   22.06
  28  13 -13    7.87   10.58
 -28 -13  13   -1.66    6.65
  27  12 -13  160.74   26.07
 -27 -12  13  185.66   27.37
 -27 -12  13  145.34   22.40
  26  11 -13   47.53   16.37
 -26 -11  13   19.90   18.08
 -26 -11  13   46.58   15.78
  25  10 -13  347.09   35.19
 -25 -10  13  305.13   29.72
 -25 -10  13  334.89   34.14
  24   9 -13    8.90    8.77
 -24  -9  13  -11.20    4.99
 -24  -9  13   21.24    9.73
  23   8 -13  546.39   43.64
  23   8 -13  500.00   44.90
 -23  -8  13  582.70   44.00
 -23  -8  13  544.48   38.41
  22   7 -13  315.37   28.70
  22   7 -13  323.83   32.17
 -22  -7  13  317.41   26.58
 -22  -7  13  265.03   28.20
  21   6 -13   77.43   19.05
  21   6 -13   58.07   15.47
 -21  -6  13   36.28   12.50
 -21  -6  13   77.43   14.15
  20   5 -13  140.20   20.17
  20   5 -13  104.08   15.51
 -20  -5  13  145.62   16.58
 -20  -5  13  140.04   19.77
  19   4 -13   73.75   17.34
  19   4 -13   69.67   13.60
 -19  -4  13   80.38   12.03
 -19  -4  13   76.37   16.35
  18   3 -13   89.15   18.43
  18   3 -13   71.37   11.73
 -18  -3  13   69.81   14.57
 -18  -3  13   70.23   10.70
  17   2 -13  307.09   22.59
 -17  -2  13  310.55   21.46
 -17  -2  13  293.20   26.54
  16   1 -13   53.94   13.82
  16   1 -13   89.25   11.04
 -16  -1  13   90.02   10.23
 -16  -1  13   69.93   14.08
  15   0 -13  470.21   27.60
  15   0 -13  600.20   38.71
 -15   0  13  452.63   32.22
 -15   0  13  453.80   24.86
  14  -1 -13   15.20    7.86
  14  -1 -13   17.70    5.25
 -14   1  13    9.08    3.79
 -14   1  13    1.85    4.54
  13  -2 -13 1053.05   56.52
  13  -2 -13 1012.24   44.39
 -13   2  13 1014.64   52.85
 -13   2  13  954.47   41.79
  12  -3 -13  101.04   14.87
  12  -3 -13  110.43    8.55
 -12   3  13   73.82   12.08
 -12   3  13   86.97    7.23
  11  -4 -13   98.32    7.16
  11  -4 -13   91.91   13.69
 -11   4  13   89.45    6.51
 -11   4  13   82.19   12.84
  10  -5 -13  884.70   35.17
  10  -5 -13  928.00   49.45
 -10   5  13  830.28   46.70
 -10   5  13  889.42   34.37
   9  -6 -13  210.43   19.53
   9  -6 -13  207.51    9.47
  -9   6  13  213.81   19.57
   8  -7 -13   59.19    4.03
   8  -7 -13   50.63   10.83
  -8   7  13   74.55   11.80
   7  -8 -13   47.27   10.57
   7  -8 -13   54.15    5.04
   7  -8 -13   63.38    4.87
  -7   8  13   65.02   12.87
  -7   8  13   70.69   10.72
   6  -9 -13  212.96   11.67
   6  -9 -13  210.95   12.26
   6  -9 -13  192.18   17.93
  -6   9  13  208.20   18.98
  -6   9  13  183.88   16.94
   5 -10 -13  861.85   45.50
   5 -10 -13  896.98   38.37
   5 -10 -13  858.44   37.29
  -5  10  13  821.19   43.72
  -5  10  13  912.18   47.27
   4 -11 -13  109.13   10.01
   4 -11 -13  102.49   12.63
   4 -11 -13  106.82    9.34
  -4  11  13  132.89   15.55
  -4  11  13  120.31   13.11
   3 -12 -13   76.74   10.88
   3 -12 -13   97.65    9.65
   3 -12 -13  112.08   10.86
  -3  12  13   96.18   13.79
  -3  12  13   94.86   11.52
   2 -13 -13  957.33   45.49
   2 -13 -13  955.04   47.24
   2 -13 -13  931.33   44.17
  -2  13  13  907.89   46.31
  -2  13  13 1020.26   52.18
   1 -14 -13    9.96    4.88
   1 -14 -13   16.54    5.36
   1 -14 -13   20.16    6.51
  -1  14  13    8.15    6.12
  -1  14  13    9.68    4.96
  -1  14  13    2.63    3.98
   0 -15 -13  458.62   28.56
   0 -15 -13  509.74   30.72
   0  15  13  482.71   31.21
   0  15  13  480.85   33.38
   0  15  13  520.94   30.12
  -1 -16 -13   81.82   12.37
   1  16  13   90.43   14.21
   1  16  13   63.51   12.54
   1  16  13   94.23   13.27
   1  16  13   86.78   11.60
  -2 -17 -13  304.48   24.66
   2  17  13  319.62   26.28
   2  17  13  321.52   21.98
   2  17  13  318.27   21.93
   2  17  13  331.30   28.17
  -3 -18 -13   62.86   12.89
   3  18  13   66.68    9.80
   3  18  13   83.51   15.91
   3  18  13   79.16   10.13
   3  18  13   63.29   13.84
  -4 -19 -13   88.06   16.43
   4  19  13   77.38   10.21
   4  19  13   85.09   16.44
   4  19  13  103.89   22.87
   4  19  13   61.44    9.42
  -5 -20 -13  185.37   21.35
   5  20  13  123.38   12.70
   5  20  13  135.30   19.68
   5  20  13  116.52   12.53
   5  20  13  165.73   20.78
  -6 -21 -13   67.77   15.82
   6  21  13   61.03    9.63
   6  21  13   58.47    9.99
   6  21  13   40.71   13.31
  -7 -22 -13  312.45   30.11
   7  22  13  323.43   21.46
   7  22  13  317.83   21.36
   7  22  13  326.53   30.90
  -8 -23 -13  496.50   39.84
   8  23  13  508.83   28.64
   8  23  13  478.87   28.09
   8  23  13  546.66   41.31
  -9 -24 -13   15.04   10.70
   9  24  13    5.29    4.54
   9  24  13    3.95    4.47
   9  24  13    0.04    7.30
 -10 -25 -13  347.96   34.95
  10  25  13  284.91   19.85
  10  25  13  316.64   20.16
  10  25  13  299.79   31.29
 -11 -26 -13  109.78   24.02
  11  26  13   48.50    8.51
  11  26  13   65.67   17.73
  11  26  13   34.55    7.70
 -12 -27 -13  165.58   26.01
  12  27  13  170.46   25.75
  12  27  13  142.35   12.39
 -13 -28 -13    2.12    9.60
  13  28  13   -3.62    6.80
 -14 -29 -13  123.39   25.84
  14  29  13  110.61   25.59
 -15 -30 -13  120.41   27.74
  15  30  13  147.78   28.91
 -16 -31 -13   24.80   16.21
  16  31  13   38.17   16.98
  31  17 -12   83.43   23.33
 -31 -17  12   67.14   21.29
 -31 -17  12  110.21   27.24
  30  16 -12  123.04   26.54
 -30 -16  12  102.09   22.76
 -30 -16  12  142.32   27.92
 -29 -15  12   30.84   15.62
 -29 -15  12   -6.49    6.40
  28  14 -12   38.94   15.41
 -28 -14  12   11.08   10.03
  27  13 -12  189.06   27.66
 -27 -13  12  185.53   27.49
 -27 -13  12  152.89   23.16
  26  12 -12   -3.32    6.33
 -26 -12  12    0.35    6.99
 -26 -12  12   -5.92    7.42
  25  11 -12  166.08   24.77
 -25 -11  12  107.85   22.75
 -25 -11  12  135.44   20.33
  24  10 -12   42.62   14.49
 -24 -10  12   58.53   16.22
 -24 -10  12   40.33   12.59
  23   9 -12   88.63   19.51
 -23  -9  12  101.76   20.62
 -23  -9  12   84.69   16.99
  22   8 -12  243.27   25.63
  22   8 -12  248.08   28.02
 -22  -8  12  303.89   30.09
 -22  -8  12  287.14   26.21
  21   7 -12   27.11   10.91
  21   7 -12   38.10   12.99
 -21  -7  12   36.86   12.43
 -21  -7  12   17.89    7.83
  20   6 -12   13.14    9.47
  20   6 -12   21.21    9.12
 -20  -6  12   11.56    8.39
 -20  -6  12   24.34    9.09
  19   5 -12  264.42   26.69
  19   5 -12  195.08   20.40
 -19  -5  12  204.39   22.88
 -19  -5  12  243.39   20.80
  18   4 -12   32.63    9.51
  18   4 -12   24.72   10.86
 -18  -4  12   56.59   13.40
 -18  -4  12   28.80   12.26
  17   3 -12   80.44   16.12
  17   3 -12   77.64   11.53
 -17  -3  12   78.75   15.58
 -17  -3  12   99.49   11.89
  16   2 -12  214.17   17.84
  16   2 -12  200.64   21.69
 -16  -2  12  221.62   17.29
 -16  -2  12  227.81   22.22
  15   1 -12  166.95   19.43
  15   1 -12  145.06   13.73
 -15  -1  12  143.73   12.83
 -15  -1  12  139.16   17.08
  14   0 -12   43.92    8.02
  14   0 -12   39.51   11.06
 -14   0  12   56.79    7.39
 -14   0  12   35.40    9.53
  13  -1 -12   24.61    8.94
  13  -1 -12   29.07    5.92
 -13   1  12   32.73    6.01
 -13   1  12   24.31    8.41
  12  -2 -12    1.56    4.34
  12  -2 -12    0.23    2.16
 -12   2  12   -5.04    2.77
 -12   2  12   -0.86    1.56
  11  -3 -12   27.14    8.52
  11  -3 -12   24.43    4.40
 -11   3  12   20.00    3.89
 -11   3  12    9.79    6.17
  10  -4 -12  776.31   43.71
  10  -4 -12  782.31   31.97
 -10   4  12  841.95   44.07
 -10   4  12  776.23   32.14
   9  -5 -12  125.63    6.88
   9  -5 -12  113.94   14.15
  -9   5  12  145.15   15.37
  -9   5  12  140.66    7.36
  -9   5  12   97.11   13.08
   8  -6 -12 1026.96   50.25
   8  -6 -12  933.67   36.63
  -8   6  12  996.01   49.20
  -8   6  12  902.19   47.33
   7  -7 -12   -0.79    1.30
   7  -7 -12   -0.04    3.55
   7  -7 -12    2.26    1.40
  -7   7  12   -0.72    3.37
  -7   7  12   -1.36    3.57
   6  -8 -12  991.10   39.17
   6  -8 -12 1025.98   49.76
   6  -8 -12  940.45   39.63
  -6   8  12  938.33   48.28
  -6   8  12  935.16   46.79
   5  -9 -12  156.45   14.83
   5  -9 -12  132.34    9.08
   5  -9 -12  129.79    9.57
  -5   9  12  123.68   13.06
  -5   9  12  122.11   14.16
   4 -10 -12  819.33   42.00
   4 -10 -12  802.43   35.72
   4 -10 -12  804.79   36.48
  -4  10  12  789.08   42.11
  -4  10  12  740.64   39.11
   3 -11 -12   14.97    4.34
   3 -11 -12   15.88    4.92
   3 -11 -12   34.65    8.14
  -3  11  12   30.24    8.40
   2 -12 -12   -0.67    2.71
   2 -12 -12   -0.74    2.85
   2 -12 -12   -2.38    1.83
  -2  12  12   -2.67    3.76
  -2  12  12   -1.66    3.02
   1 -13 -12   28.49    6.97
   1 -13 -12   24.73    6.69
  -1  13  12   25.97    7.25
  -1  13  12   37.43    8.02
  -1  13  12   24.06    8.48
   0 -14 -12   54.05   10.16
   0 -14 -12   51.20    9.74
   0  14  12   79.42   10.80
   0  14  12   29.32    7.33
   0  14  12   30.65    9.17
  -1 -15 -12  165.82   16.42
   1  15  12  143.48   13.89
   1  15  12  168.21   17.64
   1  15  12  158.01   16.45
   1  15  12  149.76   13.61
  -2 -16 -12  198.44   22.56
   2  16  12  203.43   16.28
   2  16  12  185.72   19.47
   2  16  12  194.91   15.52
   2  16  12  178.90   18.79
  -3 -17 -12   83.15   13.19
   3  17  12   83.25   15.40
   3  17  12   89.54   10.60
   3  17  12   76.42    9.81
   3  17  12   92.30   17.38
  -4 -18 -12   21.75    9.39
   4  18  12   38.15    8.15
   4  18  12   50.36    8.86
   4  18  12   25.95    9.97
   4  18  12   53.24   15.95
  -5 -19 -12  300.46   26.77
   5  19  12  236.76   24.81
   5  19  12  248.21   18.05
   5  19  12  246.04   18.16
   5  19  12  271.37   25.35
  -6 -20 -12   26.24   11.36
   6  20  12    7.46    8.06
   6  20  12   20.79    6.27
   6  20  12   20.19    6.28
   6  20  12   34.09   12.23
  -7 -21 -12   10.67    8.55
   7  21  12   45.93   13.28
   7  21  12   25.37    7.23
   7  21  12   35.31    7.70
  -8 -22 -12  233.84   26.27
   8  22  12  243.16   18.44
   8  22  12  269.81   19.13
   8  22  12  331.29   30.35
  -9 -23 -12   82.82   18.43
   9  23  12   85.14   10.61
   9  23  12   78.04   10.45
   9  23  12  101.84   19.68
 -10 -24 -12   29.41   14.03
  10  24  12   30.09   12.73
  10  24  12   41.46    8.24
  10  24  12   21.44    6.67
 -11 -25 -12   96.85   21.14
  11  25  12  112.59   11.71
  11  25  12  107.11   11.85
  11  25  12  102.72   21.46
 -12 -26 -12    1.94    8.28
  12  26  12   -2.01    3.97
  12  26  12    0.86    3.63
  12  26  12   -9.92    5.26
 -13 -27 -12  142.03   27.47
  13  27  12  151.68   13.16
  13  27  12  178.41   26.29
 -14 -28 -12    9.01   10.94
  14  28  12   28.22   13.73
  14  28  12   30.30    7.58
 -15 -29 -12    8.99   12.24
  15  29  12    1.09    9.11
 -16 -30 -12  112.23   25.73
  16  30  12   82.94   22.02
 -17 -31 -12   53.99   20.37
  17  31  12   45.44   19.30
  31  18 -11   36.81   17.83
 -31 -18  11   47.80   19.57
 -31 -18  11   54.02   18.93
  30  17 -11  114.69   25.38
 -30 -17  11   78.23   20.92
 -30 -17  11   59.55   19.04
  29  16 -11  108.13   24.21
 -29 -16  11   56.61   17.86
 -29 -16  11   81.80   21.34
  28  15 -11  131.52   26.56
 -28 -15  11  125.38   42.11
 -28 -15  11  100.34   22.56
  27  14 -11   34.94   16.09
 -27 -14  11   26.42   11.92
 -27 -14  11   16.63   13.46
  26  13 -11   91.16   22.40
 -26 -13  11   46.99   14.01
 -26 -13  11   71.62   19.50
  25  12 -11  161.18   24.17
 -25 -12  11  119.21   34.37
 -25 -12  11  164.09   24.41
  24  11 -11   -5.53    5.91
 -24 -11  11   -8.33    4.46
 -24 -11  11   -1.66    5.60
  23  10 -11    4.43    7.07
 -23 -10  11   19.67   11.05
 -23 -10  11   25.49   10.26
  22   9 -11  102.73   21.82
  22   9 -11  106.40   20.74
 -22  -9  11  108.78   21.77
 -22  -9  11   94.47   17.48
  21   8 -11   97.52   19.40
  21   8 -11  112.62   17.27
 -21  -8  11  109.08   16.25
 -21  -8  11  118.35   18.81
  20   7 -11   87.50   18.74
  20   7 -11   72.43   18.52
 -20  -7  11   97.88   17.62
 -20  -7  11   91.55   18.61
  19   6 -11   84.88   15.89
  19   6 -11   70.27   15.52
 -19  -6  11   59.92   14.24
 -19  -6  11   61.89   13.11
  18   5 -11  297.21   24.41
  18   5 -11  310.23   28.22
 -18  -5  11  341.71   24.80
 -18  -5  11  290.06   26.87
  17   4 -11  270.03   25.62
  17   4 -11  257.18   21.49
 -17  -4  11  249.31   23.73
 -17  -4  11  279.08   21.21
  16   3 -11   48.35   12.80
  16   3 -11   43.54    9.49
 -16  -3  11   53.40   12.39
 -16  -3  11   45.28    9.11
  15   2 -11   35.75   11.12
  15   2 -11   27.66    7.18
 -15  -2  11   41.29   10.94
 -15  -2  11   49.77    9.26
  14   1 -11    9.45    5.51
  14   1 -11    4.55    5.93
 -14  -1  11   29.10    9.06
 -14  -1  11   10.53    4.36
  13   0 -11 2142.03   93.46
  13   0 -11 1978.41   83.08
 -13   0  11 2070.95   82.86
 -13   0  11 2047.76   91.10
  12  -1 -11 1123.90   49.39
  12  -1 -11 1228.72   59.95
 -12   1  11 1191.34   59.23
 -12   1  11 1236.84   50.93
  11  -2 -11 1507.53   61.24
  11  -2 -11 1552.35   72.11
 -11   2  11 1517.44   68.54
 -11   2  11 1435.33   58.39
  10  -3 -11 2575.07   97.85
  10  -3 -11 2726.51  111.00
  10  -3 -11 2474.85  108.64
 -10   3  11 2602.59   96.80
 -10   3  11 2483.18  107.57
 -10   3  11 2592.40  107.76
   9  -4 -11 1304.26   50.10
   9  -4 -11 1242.00   60.15
   9  -4 -11 1355.69   62.62
  -9   4  11 1303.51   60.95
  -9   4  11 1312.52   49.66
  -9   4  11 1235.18   60.26
   8  -5 -11  203.35   17.52
   8  -5 -11  218.55   10.20
   8  -5 -11  261.81   20.17
  -8   5  11  219.91   18.75
  -8   5  11  238.84   11.01
  -8   5  11  258.94   19.45
   7  -6 -11  655.21   26.22
   7  -6 -11  619.75   35.56
   7  -6 -11  721.92   37.80
   7  -6 -11  673.09   27.62
  -7   6  11  677.76   36.98
  -7   6  11  654.44   36.06
   6  -7 -11  660.90   27.52
   6  -7 -11  637.82   35.82
   6  -7 -11  660.88   26.94
   6  -7 -11  672.78   36.47
  -6   7  11  664.72   37.23
  -6   7  11  705.09   36.80
   5  -8 -11  230.39   12.98
   5  -8 -11  193.94   17.39
   5  -8 -11  247.94   12.61
   5  -8 -11  243.75   18.66
  -5   8  11  251.50   19.79
   4  -9 -11 1249.05   60.97
   4  -9 -11 1348.03   60.76
   4  -9 -11 1331.38   53.88
   4  -9 -11 1377.41   54.88
  -4   9  11 1381.94   62.67
  -4   9  11 1303.49   59.75
   3 -10 -11 2586.42  114.73
   3 -10 -11 2713.60  107.65
   3 -10 -11 2589.96  101.98
   3 -10 -11 2632.94  103.12
  -3  10  11 2676.50  109.57
  -3  10  11 2554.71  105.64
   2 -11 -11 1545.79   64.54
   2 -11 -11 1474.26   66.09
   2 -11 -11 1513.64   63.33
  -2  11  11 1522.66   65.15
  -2  11  11 1498.34   66.10
  -2  11  11 1562.70   70.30
   1 -12 -11 1215.77   55.82
   1 -12 -11 1265.69   56.24
  -1  12  11 1212.21   53.03
  -1  12  11 1127.43   56.46
  -1  12  11 1127.60   58.03
   0 -13 -11 2001.45   84.86
   0 -13 -11 2078.64   86.85
   0  13  11 2027.06   84.56
   0  13  11 2079.65   90.58
   0  13  11 2035.38   87.46
  -1 -14 -11    3.83    4.06
   1  14  11    1.72    4.27
   1  14  11   19.13    5.68
   1  14  11    8.86    4.60
   1  14  11    8.01    5.69
  -2 -15 -11   32.79    8.90
   2  15  11   40.61    8.09
   2  15  11   49.91   10.92
   2  15  11   37.83    9.61
   2  15  11   38.69    8.08
  -3 -16 -11   54.13   11.90
   3  16  11   54.27    8.29
   3  16  11   44.95   10.68
   3  16  11   26.97    9.08
   3  16  11   49.57    7.69
  -4 -17 -11  307.14   25.49
   4  17  11  256.32   23.18
   4  17  11  267.50   18.31
   4  17  11  247.92   17.65
   4  17  11  225.89   22.84
  -5 -18 -11  340.27   28.10
   5  18  11  286.21   25.48
   5  18  11  253.83   18.40
   5  18  11  302.34   19.51
   5  18  11  276.24   26.12
  -6 -19 -11   76.61   15.92
   6  19  11   88.71   18.08
   6  19  11   67.37   15.54
   6  19  11   87.12   10.30
   6  19  11   72.36    9.50
  -7 -20 -11   70.72   15.31
   7  20  11   88.86   10.54
   7  20  11   74.05    9.86
   7  20  11   83.23   16.42
   7  20  11  116.16   18.66
  -8 -21 -11  102.45   19.63
   8  21  11  131.83   12.69
   8  21  11  107.04   11.74
   8  21  11  128.15   18.34
  -9 -22 -11   88.75   18.78
   9  22  11   98.67   19.42
   9  22  11  128.38   12.41
   9  22  11   98.12   11.49
 -10 -23 -11    8.57    9.31
  10  23  11   23.73    6.79
  10  23  11   18.01    9.72
  10  23  11   29.27    7.43
 -11 -24 -11   -1.65    5.93
  11  24  11   -2.24    5.13
  11  24  11   -0.50    3.78
  11  24  11    0.81    4.06
 -12 -25 -11  151.49   24.31
  12  25  11   99.10   12.06
  12  25  11  126.84   12.41
  12  25  11   73.35   18.53
 -13 -26 -11   35.00   14.78
  13  26  11   70.09   10.95
  13  26  11   74.98   18.58
  13  26  11   55.64    8.92
 -14 -27 -11    8.92   10.80
  14  27  11   23.36    6.64
  14  27  11   11.52   10.58
 -15 -28 -11  120.69   25.96
  15  28  11  114.40   11.51
  15  28  11  141.12   27.50
 -16 -29 -11  129.72   29.18
  16  29  11  130.92   27.68
 -17 -30 -11   54.57   19.83
  17  30  11   85.21   22.36
 -18 -31 -11   83.47   35.61
  18  31  11   24.55   15.82
  31  19 -10  132.06   27.18
 -31 -19  10  128.58   29.84
 -31 -19  10   68.78   21.95
  30  18 -10   57.58   18.78
 -30 -18  10   71.48   35.27
 -30 -18  10   99.47   26.30
  29  17 -10   54.15   17.84
 -29 -17  10   75.51   21.65
 -29 -17  10   91.67   22.61
  28  16 -10    8.13   11.01
 -28 -16  10   40.57   16.66
 -28 -16  10   11.50   10.93
  27  15 -10    8.31   10.12
 -27 -15  10    4.29    8.34
 -27 -15  10    3.77    8.99
  26  14 -10   67.29   19.06
 -26 -14  10   66.06   19.07
 -26 -14  10   74.47   18.54
  25  13 -10  304.20   32.27
 -25 -13  10  318.36   32.13
 -25 -13  10  352.99   35.10
  24  12 -10   27.03   10.60
 -24 -12  10   42.35   13.67
 -24 -12  10   29.66   11.50
  23  11 -10   14.34    9.29
 -23 -11  10   31.71   11.76
 -23 -11  10   46.22   14.97
  22  10 -10    1.68    6.12
 -22 -10  10    0.49    5.50
 -22 -10  10    3.72    8.06
  21   9 -10  137.75   20.15
  21   9 -10  139.33   19.46
 -21  -9  10  149.50   19.01
 -21  -9  10  117.24   18.92
  20   8 -10  222.72   24.64
  20   8 -10  204.09   22.57
 -20  -8  10  257.30   25.60
 -20  -8  10  200.11   21.53
  19   7 -10  190.23   20.78
 -19  -7  10  140.37   17.44
 -19  -7  10  217.50   22.70
  18   6 -10  129.54   18.60
  18   6 -10  149.42   17.62
 -18  -6  10  119.05   15.00
 -18  -6  10  142.16   18.06
  17   5 -10  343.73   28.85
  17   5 -10  358.90   26.55
 -17  -5  10  404.06   30.82
  16   4 -10  431.21   28.38
  16   4 -10  415.34   31.68
 -16  -4  10  430.84   28.11
 -16  -4  10  515.15   33.85
  15   3 -10   72.16   10.47
  15   3 -10   60.61   13.38
 -15  -3  10   61.71    9.13
 -15  -3  10   80.49   12.85
  14   2 -10  133.39   16.02
  14   2 -10  110.31   11.98
 -14  -2  10  147.38   15.81
 -14  -2  10  107.33   11.23
  13   1 -10   13.78    4.76
  13   1 -10    8.77    6.72
 -13  -1  10   13.95    7.15
 -13  -1  10    6.83    3.68
  12   0 -10   -0.54    2.17
  12   0 -10    3.61    4.09
 -12   0  10   -1.07    1.99
 -12   0  10   -1.31    3.46
  11  -1 -10   26.60    7.86
  11  -1 -10   33.76    8.60
  11  -1 -10   33.04    5.89
 -11   1  10   40.68    9.66
 -11   1  10   30.96    4.90
 -11   1  10   43.26    9.80
  10  -2 -10    7.63    4.83
  10  -2 -10    1.10    3.29
  10  -2 -10    2.18    2.04
 -10   2  10   -1.04    1.56
 -10   2  10   -0.41    3.35
 -10   2  10    4.72    4.05
   9  -3 -10  886.84   36.41
   9  -3 -10  889.14   44.88
   9  -3 -10  937.65   46.83
  -9   3  10  949.63   38.10
  -9   3  10  974.00   47.36
  -9   3  10  931.14   47.08
   8  -4 -10  562.45   31.42
   8  -4 -10  499.13   29.51
   8  -4 -10  489.33   20.90
  -8   4  10  494.68   29.42
  -8   4  10  523.18   21.03
  -8   4  10  472.52   29.23
   7  -5 -10   21.34    6.72
   7  -5 -10   24.30    2.55
   7  -5 -10   17.32    5.88
  -7   5  10   23.75    6.56
  -7   5  10   26.45    6.92
   6  -6 -10   -0.83    1.00
   6  -6 -10    1.92    1.48
   6  -6 -10    1.75    3.32
   6  -6 -10    0.76    2.90
  -6   6  10    8.18    4.88
  -6   6  10    3.28    3.66
   5  -7 -10   22.42    3.22
   5  -7 -10   28.75    7.09
   5  -7 -10   25.66    3.94
   5  -7 -10   23.01    6.61
  -5   7  10   22.22    6.62
  -5   7  10   23.44    6.33
   4  -8 -10  494.81   22.57
   4  -8 -10  465.29   28.31
   4  -8 -10  485.22   28.02
   4  -8 -10  508.67   23.36
  -4   8  10  456.98   26.65
  -4   8  10  496.79   28.88
   3  -9 -10  947.35   39.80
   3  -9 -10  946.07   44.34
   3  -9 -10  887.63   40.17
   3  -9 -10  911.17   45.40
  -3   9  10  916.38   44.88
  -3   9  10 1037.83   48.36
   2 -10 -10    3.24    3.45
   2 -10 -10   -2.22    1.87
   2 -10 -10    6.02    3.04
  -2  10  10   -0.03    2.73
  -2  10  10    1.73    2.81
  -2  10  10   -1.70    2.74
   1 -11 -10   43.00    8.29
   1 -11 -10   28.36    6.59
   1 -11 -10   25.19    7.22
  -1  11  10   29.89    6.48
  -1  11  10   25.62    6.26
  -1  11  10   27.67    7.53
   0 -12 -10   -0.61    3.06
   0 -12 -10    2.32    3.26
   0  12  10   -0.18    2.66
   0  12  10    2.66    3.82
   0  12  10    4.64    3.87
  -1 -13 -10    2.59    3.91
   1  13  10   11.02    5.70
   1  13  10    9.38    4.47
   1  13  10   14.88    5.29
   1  13  10    3.23    4.26
  -2 -14 -10  126.18   14.44
   2  14  10  135.19   15.02
   2  14  10  116.61   14.11
   2  14  10  126.22   11.59
   2  14  10  109.71   11.35
  -3 -15 -10   38.59    9.34
   3  15  10   84.55   12.59
   3  15  10   72.64    8.93
   3  15  10   62.00   12.32
   3  15  10   65.35    8.50
  -4 -16 -10  525.49   34.43
   4  16  10  506.61   33.37
   4  16  10  487.10   33.86
   4  16  10  460.76   26.45
   4  16  10  524.09   27.58
  -5 -17 -10  332.98   27.00
   5  17  10  329.29   20.95
   5  17  10  322.38   26.64
   5  17  10  370.32   29.30
   5  17  10  336.79   21.05
  -6 -18 -10  104.58   15.77
   6  18  10  117.52   11.67
   6  18  10   87.00   23.17
   6  18  10  118.64   11.84
   6  18  10  158.76   18.19
  -7 -19 -10  187.49   21.69
   7  19  10  205.39   21.60
   7  19  10  155.08   13.90
   7  19  10  155.84   20.72
   7  19  10  179.20   14.60
  -8 -20 -10  225.72   24.51
   8  20  10  188.93   21.75
   8  20  10  192.39   15.50
   8  20  10  204.48   31.53
   8  20  10  171.14   14.79
  -9 -21 -10  101.69   19.41
   9  21  10  141.34   12.85
   9  21  10  120.44   12.38
   9  21  10  111.73   17.84
 -10 -22 -10   -3.68    5.77
  10  22  10   -2.96    2.96
  10  22  10   -4.92    4.16
  10  22  10   -1.45    3.21
 -11 -23 -10   34.75   13.73
  11  23  10   19.61   10.30
  11  23  10   18.37    6.65
  11  23  10   18.94    6.22
 -12 -24 -10   63.31   17.66
  12  24  10   32.34    7.38
  12  24  10   42.63   13.94
 -13 -25 -10  300.42   33.77
  13  25  10  304.21   20.73
  13  25  10  293.87   31.21
 -14 -26 -10   34.99   15.04
  14  26  10   64.36   17.56
  14  26  10   56.53    9.84
 -15 -27 -10    3.90    9.96
  15  27  10    4.95    4.67
  15  27  10   -6.04    7.37
 -16 -28 -10   12.24   12.03
  16  28  10   15.98    5.96
  16  28  10   22.92   12.88
 -17 -29 -10   28.68   22.05
  17  29  10   62.71   10.31
  17  29  10  112.65   24.82
 -18 -30 -10  121.81   27.70
  18  30  10   58.32   19.67
  19  31  10  140.29   29.17
  31  20  -9  100.78   24.80
 -31 -20   9   60.20   21.16
 -31 -20   9   74.03   23.15
  30  19  -9   52.73   22.92
 -30 -19   9   55.24   19.23
 -30 -19   9   51.20   21.21
  29  18  -9   58.87   19.39
 -29 -18   9   41.65   17.45
 -29 -18   9   77.30   22.25
  28  17  -9   15.98   11.87
  28  17  -9   11.25   11.85
 -28 -17   9   13.44   11.71
 -28 -17   9    9.27   11.54
  27  16  -9  150.05   27.58
  27  16  -9  107.32   22.41
 -27 -16   9  167.34   25.59
 -27 -16   9  223.39   29.11
  26  15  -9   82.90   19.60
  26  15  -9   82.40   20.48
 -26 -15   9   55.60   17.19
 -26 -15   9   74.84   19.31
  25  14  -9   13.97    9.79
  25  14  -9   12.64   10.38
 -25 -14   9   26.28   11.87
 -25 -14   9   19.62   11.63
  24  13  -9    1.88    7.26
  24  13  -9   -4.76    6.93
 -24 -13   9   10.05    8.26
 -24 -13   9   -8.65    5.23
  23  12  -9  110.87   21.53
  23  12  -9   86.70   19.09
 -23 -12   9   72.84   17.71
 -23 -12   9   79.13   18.65
  22  11  -9  106.85   20.00
  22  11  -9   82.81   18.09
 -22 -11   9   91.32   18.78
 -22 -11   9  109.85   17.64
  21  10  -9  145.52   20.94
  21  10  -9  145.12   20.10
  21  10  -9  163.05   21.16
 -21 -10   9  114.91   18.33
 -21 -10   9  107.13   16.96
  20   9  -9   10.84    7.21
  20   9  -9    5.47    6.77
 -20  -9   9    1.54    4.84
 -20  -9   9   -0.90    5.15
  19   8  -9  402.87   36.95
  19   8  -9  405.71   32.69
 -19  -8   9  373.67   36.37
 -19  -8   9  377.02   29.19
  18   7  -9   28.20    9.56
  18   7  -9   43.64   12.07
 -18  -7   9   43.17   10.82
 -18  -7   9   36.97   11.16
  17   6  -9   26.96   10.00
  17   6  -9   43.42   10.83
 -17  -6   9   34.90   10.55
 -17  -6   9   38.47    9.57
  16   5  -9  340.05   25.64
  16   5  -9  378.89   28.88
 -16  -5   9  411.66   29.10
 -16  -5   9  329.51   24.46
  15   4  -9   12.50    5.25
  15   4  -9    3.95    5.19
 -15  -4   9   15.38    6.84
 -15  -4   9   12.26    5.50
  14   3  -9  295.64   23.90
  14   3  -9  267.56   19.99
 -14  -3   9  267.42   19.43
 -14  -3   9  316.10   23.79
  13   2  -9  338.81   25.53
 -13  -2   9  324.49   24.27
 -13  -2   9  331.94   20.71
  12   1  -9 1460.56   61.63
  12   1  -9 1399.49   67.38
 -12  -1   9 1369.93   64.32
 -12  -1   9 1437.14   65.01
 -12  -1   9 1335.42   64.87
 -12  -1   9 1401.47   58.78
  11   0  -9   -2.63    1.90
  11   0  -9    0.33    3.32
 -11   0   9   -1.48    3.11
 -11   0   9    0.24    2.04
 -11   0   9    9.83    5.11
 -11   0   9   11.60    5.92
  10  -1  -9  296.11   16.04
  10  -1  -9  248.47   20.43
  10  -1  -9  269.06   20.18
 -10   1   9  284.60   15.36
 -10   1   9  271.18   20.61
 -10   1   9  278.64   20.60
   9  -2  -9   56.30   10.09
   9  -2  -9   52.77    5.46
   9  -2  -9   81.01   11.01
  -9   2   9   71.38    5.88
  -9   2   9   50.69    9.20
  -9   2   9   61.81    9.53
   8  -3  -9  172.35    9.31
   8  -3  -9  157.67   14.76
   8  -3  -9  186.97   16.29
  -8   3   9  181.11   15.04
  -8   3   9  160.44    8.85
   7  -4  -9  306.91   13.41
   7  -4  -9  315.82   21.45
   7  -4  -9  334.37   28.82
  -7   4   9  314.05   13.83
  -7   4   9  333.62   21.79
  -7   4   9  333.12   21.44
   6  -5  -9  924.30   36.05
   6  -5  -9  942.19   45.63
   6  -5  -9  999.03   46.06
  -6   5   9  966.71   45.44
  -6   5   9  913.67   44.41
   5  -6  -9  951.47   44.57
   5  -6  -9  900.08   44.63
   5  -6  -9  922.86   36.14
   5  -6  -9  927.19   36.72
  -5   6   9  972.71   45.52
  -5   6   9  917.64   44.08
   4  -7  -9  346.09   21.34
   4  -7  -9  301.63   29.51
   4  -7  -9  311.41   15.59
   4  -7  -9  342.67   16.47
  -4   7   9  323.99   20.14
  -4   7   9  306.32   20.81
   3  -8  -9  170.07   10.85
   3  -8  -9  175.80   11.46
   3  -8  -9  171.81   13.98
   3  -8  -9  156.61   14.18
  -3   8   9  200.00   15.60
  -3   8   9  146.55   12.93
   2  -9  -9   63.70    8.49
   2  -9  -9   69.64    7.81
   2  -9  -9   74.16    9.60
  -2   9   9   62.48    7.37
  -2   9   9   43.30    8.49
  -2   9   9   52.56    7.51
   1 -10  -9  293.39   18.45
   1 -10  -9  264.53   17.55
   1 -10  -9  272.55   19.89
  -1  10   9  228.84   18.50
  -1  10   9  266.58   17.26
  -1  10   9  290.98   18.17
   0 -11  -9   -0.52    2.96
   0 -11  -9   -0.35    3.55
   0 -11  -9   -0.87    2.02
   0  11   9    1.05    3.48
   0  11   9    1.42    3.61
   0  11   9    0.28    2.44
  -1 -12  -9 1440.89   64.19
  -1 -12  -9 1427.23   65.12
   1  12   9 1446.24   66.05
   1  12   9 1398.85   64.69
   1  12   9 1531.60   66.65
   1  12   9 1406.24   60.97
  -2 -13  -9  366.45   24.81
   2  13   9  347.06   20.62
   2  13   9  382.12   25.31
   2  13   9  320.22   24.01
   2  13   9  365.72   25.07
  -3 -14  -9  284.02   22.30
   3  14   9  272.81   22.49
   3  14   9  254.97   18.56
   3  14   9  284.30   18.02
   3  14   9  310.72   23.09
   4  15   9   21.96    7.28
   4  15   9   12.47    4.67
   4  15   9   25.04    8.46
   4  15   9   12.73    4.59
  -5 -16  -9  349.72   27.12
   5  16   9  344.18   26.46
   5  16   9  343.76   21.04
   5  16   9  333.16   20.83
   5  16   9  404.40   29.53
  -6 -17  -9   35.45   11.26
   6  17   9   30.16    6.92
   6  17   9   38.97   11.80
   6  17   9   28.66    9.46
   6  17   9   33.88    7.08
  -7 -18  -9   24.84    9.34
   7  18   9   29.96    6.77
   7  18   9   27.30    9.76
   7  18   9   28.72    6.45
   7  18   9   22.20   10.27
  -8 -19  -9  390.27   32.15
   8  19   9  375.50   31.14
   8  19   9  375.03   32.74
   8  19   9  402.10   23.64
   8  19   9  380.57   23.35
  -9 -20  -9    1.73    5.81
   9  20   9   -2.32    4.36
   9  20   9   -1.16    3.25
   9  20   9   -1.25    2.88
 -10 -21  -9  114.63   18.95
  10  21   9  119.95   18.28
  10  21   9  123.72   12.63
  10  21   9  113.62   12.11
 -11 -22  -9  102.65   20.81
  11  22   9  117.95   18.83
  11  22   9   83.76   10.52
  11  22   9   84.91   10.92
 -12 -23  -9   96.60   28.02
  12  23   9   81.96   18.07
  12  23   9   65.61    9.71
 -13 -24  -9   -2.25    6.14
  13  24   9   11.34    5.66
  13  24   9    3.90    7.59
  13  24   9    1.55    4.21
 -14 -25  -9   41.19   15.94
  14  25   9   51.88   15.83
  14  25   9   11.84    5.53
  14  25   9   11.79    6.23
 -15 -26  -9   48.79   17.18
  15  26   9   66.23   10.30
  15  26   9   54.53   17.30
 -16 -27  -9  120.84   25.55
  16  27   9  154.07   14.69
  16  27   9  152.58   24.36
 -17 -28  -9    7.64   11.25
  17  28   9   17.05    6.45
  17  28   9   31.85   14.37
 -18 -29  -9   66.39   21.19
  18  29   9   81.20   11.05
  18  29   9   92.18   23.95
 -19 -30  -9   24.65   15.44
  19  30   9   29.70   16.42
  20  31   9  108.74   25.77
  30  20  -8  162.05   44.04
  30  20  -8  161.79   31.57
 -30 -20   8  188.92   34.25
 -30 -20   8  127.36   28.17
  29  19  -8   43.33   16.66
  29  19  -8   67.46   19.48
 -29 -19   8   72.85   31.20
 -29 -19   8   56.65   19.18
  28  18  -8   -5.42    6.59
  28  18  -8    1.15    7.27
 -28 -18   8   -5.79    7.19
  27  17  -8   91.17   22.66
  27  17  -8   87.94   21.48
 -27 -17   8   69.53   19.81
  26  16  -8   37.10   14.54
  26  16  -8   83.26   20.77
 -26 -16   8   52.27   16.10
  25  15  -8   87.23   18.82
  25  15  -8   33.97   13.85
 -25 -15   8   44.66   15.65
  24  14  -8  142.72   21.99
  24  14  -8  110.36   21.30
 -24 -14   8  138.57   21.56
  23  13  -8  436.75   37.31
  23  13  -8  472.01   38.25
 -23 -13   8  432.78   36.64
  22  12  -8  305.90   29.47
  22  12  -8  282.43   28.77
 -22 -12   8  273.66   27.63
  21  11  -8  125.26   18.58
  21  11  -8   94.86   18.42
 -21 -11   8  156.71   20.31
  20  10  -8  162.85   20.53
  20  10  -8  207.00   23.09
 -20 -10   8  224.07   23.29
  19   9  -8  402.45   32.31
  19   9  -8  394.47   31.79
  19   9  -8  391.61   35.87
 -19  -9   8  433.78   32.28
  18   8  -8   -0.96    5.08
  18   8  -8    3.57    6.09
  18   8  -8    3.07    5.24
 -18  -8   8    2.86    5.01
 -18  -8   8   -2.23    3.88
  17   7  -8  566.60   36.38
  17   7  -8  559.96   37.46
  17   7  -8  533.24   36.25
 -17  -7   8  526.43   36.00
 -17  -7   8  537.19   34.29
  16   6  -8    3.89    4.71
  16   6  -8    6.49    6.83
 -16  -6   8   -0.89    4.27
  15   5  -8  141.74   16.31
  15   5  -8  113.01   13.92
 -15  -5   8  141.67   16.04
 -15  -5   8  143.21   14.72
  14   4  -8   57.89    9.56
  14   4  -8   60.50   12.05
 -14  -4   8   52.49   10.70
 -14  -4   8   74.89   10.01
  13   3  -8    7.61    5.95
  13   3  -8   19.52    6.20
 -13  -3   8    9.10    4.52
 -13  -3   8   21.21    7.46
 -13  -3   8   20.13    7.55
  12   2  -8  632.45   32.62
  12   2  -8  622.29   36.54
 -12  -2   8  616.88   31.51
 -12  -2   8  635.04   35.65
 -12  -2   8  616.09   35.20
 -12  -2   8  621.17   35.15
  11   1  -8  424.14   27.58
  11   1  -8  425.51   23.38
 -11  -1   8  431.79   26.82
 -11  -1   8  425.68   22.53
 -11  -1   8  389.04   25.70
 -11  -1   8  408.81   26.38
  10   0  -8  312.81   17.43
  10   0  -8  265.44   20.90
 -10   0   8  284.73   16.06
 -10   0   8  284.53   20.41
 -10   0   8  251.12   19.45
 -10   0   8  309.67   20.88
   9  -1  -8  105.35   11.95
   9  -1  -8   93.90   11.11
   9  -1  -8  105.85    8.27
  -9   1   8   89.86   10.94
  -9   1   8   91.08    7.32
   8  -2  -8    2.29    3.47
   8  -2  -8    0.82    3.39
   8  -2  -8   -0.93    1.30
  -8   2   8    0.74    3.75
  -8   2   8    4.33    3.76
  -8   2   8    0.22    1.40
   7  -3  -8  235.64   11.40
   7  -3  -8  259.81   18.53
   7  -3  -8  256.80   17.67
  -7   3   8  258.96   11.97
  -7   3   8  275.77   18.45
  -7   3   8  253.88   18.00
   6  -4  -8  218.81   16.60
   6  -4  -8  228.81   16.36
   6  -4  -8  221.57    9.81
  -6   4   8  217.43   11.17
  -6   4   8  225.65   16.31
  -6   4   8  236.14   16.87
   5  -5  -8    1.23    1.12
   5  -5  -8   -1.93    2.40
   5  -5  -8   -0.69    2.78
  -5   5   8    0.44    3.13
  -5   5   8    0.56    2.50
   4  -6  -8  233.86   16.39
   4  -6  -8  219.34   11.24
   4  -6  -8  231.37   16.40
   4  -6  -8  240.36   11.97
  -4   6   8  223.53   15.68
  -4   6   8  226.83   16.47
   3  -7  -8  254.33   17.20
   3  -7  -8  220.77   18.33
   3  -7  -8  240.33   13.28
   3  -7  -8  226.29   12.59
  -3   7   8  266.12   16.98
  -3   7   8  247.52   17.60
   2  -8  -8    2.01    3.06
   2  -8  -8    0.88    2.99
   2  -8  -8    0.13    2.02
  -2   8   8    3.02    2.39
  -2   8   8   -0.49    2.62
  -2   8   8   -2.83    2.10
   1  -9  -8   88.26   10.47
   1  -9  -8  104.76    9.88
   1  -9  -8  109.93    9.91
  -1   9   8   81.72    8.97
  -1   9   8   95.16   10.61
  -1   9   8  113.53    9.99
   0 -10  -8  248.15   16.35
   0 -10  -8  268.95   18.90
   0 -10  -8  254.32   17.36
   0  10   8  262.66   17.79
   0  10   8  254.57   18.52
   0  10   8  242.00   15.97
  -1 -11  -8  401.37   24.34
  -1 -11  -8  387.28   24.43
   1  11   8  369.64   33.61
   1  11   8  397.90   22.93
   1  11   8  462.85   23.46
   1  11   8  449.27   26.77
  -2 -12  -8  611.75   34.31
  -2 -12  -8  645.02   34.86
   2  12   8  637.04   34.95
   2  12   8  617.02   30.43
   2  12   8  585.83   30.25
   2  12   8  656.73   35.23
  -3 -13  -8   17.54    6.97
  -3 -13  -8   14.47    6.64
   3  13   8   16.75    4.99
   3  13   8   14.00    4.65
   3  13   8    7.77    5.38
   3  13   8   32.44    8.23
  -4 -14  -8   69.87   11.26
   4  14   8   58.14   11.09
   4  14   8   65.62   13.19
   4  14   8   60.85    7.84
   4  14   8   61.72    7.74
  -5 -15  -8   94.85   13.48
   5  15   8  117.95   11.02
   5  15   8  153.60   17.16
   5  15   8  110.66   14.02
  -6 -16  -8   -3.56    3.83
   6  16   8    1.82    3.15
   6  16   8   -1.83    3.36
   6  16   8   11.80    6.80
   6  16   8    7.66    3.82
  -7 -17  -8  516.46   35.78
   7  17   8  486.88   28.05
   7  17   8  563.96   36.08
   7  17   8  565.35   38.45
   7  17   8  570.24   29.11
  -8 -18  -8   -2.63    4.74
   8  18   8    2.44    3.29
   8  18   8   -2.57    4.99
   8  18   8   -3.40    5.40
   8  18   8    1.44    3.32
  -9 -19  -8  373.63   31.63
   9  19   8  371.32   22.65
   9  19   8  375.40   34.55
   9  19   8  382.24   23.21
   9  19   8  340.31   31.77
 -10 -20  -8  171.05   22.24
  10  20   8  186.62   15.55
  10  20   8  188.94   21.79
  10  20   8  187.65   15.61
 -11 -21  -8  128.19   19.95
  11  21   8  135.03   13.20
  11  21   8  141.20   13.70
  11  21   8  130.50   18.71
 -12 -22  -8  275.80   29.81
  12  22   8  254.68   19.12
  12  22   8  284.84   28.15
 -13 -23  -8  546.42   44.56
  13  23   8  543.22   40.99
  13  23   8  479.84   29.30
  13  23   8  491.24   29.10
 -14 -24  -8  146.18   23.55
  14  24   8  151.22   15.42
  14  24   8  153.24   22.49
  14  24   8  165.17   15.39
 -15 -25  -8   66.58   18.69
  15  25   8   63.86   11.41
  15  25   8   57.22   16.27
  15  25   8   56.42   10.58
 -16 -26  -8   63.04   19.38
  16  26   8   44.05   16.50
  16  26   8   56.38   10.49
 -17 -27  -8   60.75   18.96
  17  27   8   44.46   16.48
  17  27   8   57.95   10.87
 -18 -28  -8   -8.32    7.40
  18  28   8    0.98    4.45
  18  28   8    3.77    9.87
 -19 -29  -8   53.99   18.71
  19  29   8   68.01   20.38
  19  29   8   51.06   10.22
 -20 -30  -8  160.09   32.68
  20  30   8  161.90   31.50
  30  21  -7   17.36   12.39
  30  21  -7    7.03   12.15
 -30 -21   7   -6.27    8.32
  29  20  -7   -0.93    8.86
  29  20  -7    2.40    9.96
 -29 -20   7   24.98   14.62
  28  19  -7   30.27   14.11
  28  19  -7   16.96   11.38
 -28 -19   7   17.33   12.54
  27  18  -7   12.41   12.10
  27  18  -7   35.00   14.73
 -27 -18   7   22.35   13.07
  26  17  -7   47.81   15.96
  26  17  -7   50.94   17.06
 -26 -17   7   32.44   14.86
  25  16  -7   -2.10    6.52
  25  16  -7    2.35    6.96
 -25 -16   7   11.02   10.25
  24  15  -7    2.87    7.50
  24  15  -7   -0.77    6.19
 -24 -15   7    3.77    8.03
  23  14  -7  205.19   24.91
  23  14  -7  166.40   22.43
 -23 -14   7  169.59   23.42
  22  13  -7  260.08   27.34
  22  13  -7  345.00   31.36
 -22 -13   7  295.56   29.22
  21  12  -7   16.35    9.09
  21  12  -7   35.74   13.11
 -21 -12   7   30.21   11.63
  20  11  -7   84.35   18.07
  20  11  -7   48.22   13.35
  20  11  -7   96.01   18.27
 -20 -11   7   88.57   17.12
  19  10  -7  218.06   23.44
  19  10  -7  161.40   19.98
  19  10  -7  157.19   20.34
 -19 -10   7  208.11   22.05
  18   9  -7    6.37    6.73
  18   9  -7    5.17   11.05
  18   9  -7   12.11    7.35
 -18  -9   7   35.05   10.52
  17   8  -7  596.74   37.93
  17   8  -7  549.53   37.03
  17   8  -7  537.62   36.40
 -17  -8   7  518.24   34.30
  16   7  -7    9.49    5.91
  16   7  -7   -6.00    2.45
  16   7  -7   -3.07    3.39
 -16  -7   7    2.66    4.53
  15   6  -7  314.15   24.48
  15   6  -7  275.44   22.78
  15   6  -7  256.97   21.94
 -15  -6   7  284.08   22.03
  14   5  -7  255.22   21.31
  14   5  -7  227.48   19.47
  14   5  -7  249.30   20.91
 -14  -5   7  261.28   21.77
 -14  -5   7  256.58   19.89
  13   4  -7   83.37   11.83
  13   4  -7   88.81   11.20
 -13  -4   7  118.27   13.62
 -13  -4   7   97.06   11.11
 -13  -4   7  112.12   12.96
 -13  -4   7   62.11   10.30
  12   3  -7   51.33   13.07
  12   3  -7   53.04   11.05
 -12  -3   7   31.79    8.28
 -12  -3   7   53.34   10.09
 -12  -3   7   48.44    7.67
 -12  -3   7   52.85   10.03
  11   2  -7  266.89   20.43
  11   2  -7  273.60   18.04
 -11  -2   7  267.52   19.99
 -11  -2   7  278.66   20.17
 -11  -2   7  281.29   20.51
 -11  -2   7  262.43   17.24
  10   1  -7  191.24   16.74
  10   1  -7  224.47   14.58
 -10  -1   7  241.38   20.39
 -10  -1   7  210.49   17.03
 -10  -1   7  220.17   15.38
   9   0  -7  100.66    8.72
   9   0  -7  101.91   10.90
   9   0  -7  104.74   11.74
  -9   0   7  108.13   11.36
  -9   0   7   95.05    8.06
  -9   0   7   86.07   10.35
  -9   0   7  109.64   11.55
   8  -1  -7  201.40   16.07
   8  -1  -7  181.35   14.76
   8  -1  -7  207.25   11.75
  -8   1   7  196.05   15.69
  -8   1   7  217.34   16.06
  -8   1   7  212.74   11.74
   7  -2  -7  647.14   32.37
   7  -2  -7  629.92   26.40
   7  -2  -7  652.74   33.31
  -7   2   7  603.45   31.42
  -7   2   7  611.98   25.15
  -7   2   7  615.97   31.32
   6  -3  -7   68.06    4.46
   6  -3  -7   84.77    9.14
   6  -3  -7   83.89    9.54
  -6   3   7   54.01    7.84
  -6   3   7   86.94    9.24
   5  -4  -7    4.03    3.55
   5  -4  -7    1.99    1.00
   5  -4  -7    2.28    2.96
   5  -4  -7   -0.34    1.13
  -5   4   7   -2.89    2.22
  -5   4   7    3.68    3.60
   4  -5  -7    1.32    3.00
   4  -5  -7    2.02    1.26
   4  -5  -7    5.80    3.71
   4  -5  -7    1.66    1.46
  -4   5   7   -2.88    2.30
  -4   5   7    0.38    2.93
   3  -6  -7   76.50    6.09
   3  -6  -7   54.70    7.85
   3  -6  -7   62.74    5.40
   3  -6  -7   76.52    8.47
  -3   6   7   60.82    7.57
  -3   6   7   54.15    7.87
   2  -7  -7  619.45   28.70
   2  -7  -7  661.50   31.26
   2  -7  -7  669.22   32.44
  -2   7   7  598.31   29.52
  -2   7   7  632.80   31.28
  -2   7   7  624.15   28.07
   1  -8  -7  175.67   14.14
   1  -8  -7  188.07   13.34
   1  -8  -7  203.70   13.29
  -1   8   7  191.67   14.84
  -1   8   7  184.64   12.97
  -1   8   7  187.96   13.14
   0  -9  -7   88.35    9.48
   0  -9  -7  104.07    9.37
   0  -9  -7  102.75   10.58
   0   9   7   82.31    9.75
   0   9   7  103.57    9.16
   0   9   7   97.78   10.00
  -1 -10  -7  221.70   17.16
  -1 -10  -7  240.25   16.98
   1  10   7  207.27   14.33
   1  10   7  231.59   17.09
   1  10   7  227.01   16.67
   1  10   7  213.25   14.18
  -2 -11  -7  248.55   18.44
  -2 -11  -7  259.96   18.91
   2  11   7  292.22   20.30
   2  11   7  287.72   16.95
   2  11   7  290.47   20.40
   2  11   7  262.33   16.63
  -3 -12  -7   40.91    8.33
  -3 -12  -7   43.74    9.13
   3  12   7   51.23   10.07
   3  12   7   46.54    9.89
   3  12   7   44.95    6.57
   3  12   7   46.75    6.50
  -4 -13  -7   98.28   12.57
  -4 -13  -7   80.66   10.79
   4  13   7   91.75    9.12
   4  13   7   89.03   11.81
   4  13   7  102.91   13.15
   4  13   7   92.61    9.08
  -5 -14  -7  212.92   19.39
   5  14   7  248.75   16.47
   5  14   7  286.08   22.91
   5  14   7  260.18   20.89
   5  14   7  244.54   16.27
  -6 -15  -7  256.60   22.60
   6  15   7  249.10   22.87
   6  15   7  263.78   21.96
   6  15   7  273.57   17.52
  -7 -16  -7    1.69    4.98
   7  16   7   -0.81    2.24
   7  16   7    2.62    2.88
   7  16   7   -2.45    3.52
   7  16   7    9.12    7.13
  -8 -17  -7  481.33   34.67
   8  17   7  516.99   34.63
   8  17   7  539.24   28.01
   8  17   7  492.57   27.65
   8  17   7  479.92   42.61
  -9 -18  -7   26.96   10.29
   9  18   7   27.38    6.69
   9  18   7   32.70    7.45
   9  18   7   21.85   10.10
   9  18   7   29.73    9.53
 -10 -19  -7  150.56   19.93
  10  19   7  183.24   24.95
  10  19   7  216.93   16.36
  10  19   7  157.20   14.42
 -11 -20  -7  120.18   19.22
  11  20   7   57.60    9.40
  11  20   7  102.88   16.33
  11  20   7   90.18   11.06
 -12 -21  -7   34.57   13.12
  12  21   7   30.92    9.95
  12  21   7   17.89    9.17
  12  21   7   30.98    7.40
 -13 -22  -7  302.64   31.80
  13  22   7  317.61   30.07
  13  22   7  323.16   22.19
  13  22   7  293.59   21.91
 -14 -23  -7  200.67   26.52
  14  23   7  188.43   24.15
  14  23   7  196.09   17.59
  14  23   7  185.71   16.88
 -15 -24  -7   15.20   11.04
  15  24   7    1.18    4.36
  15  24   7    0.98    4.76
  15  24   7    5.43    7.79
 -16 -25  -7    4.58    8.83
  16  25   7   -1.91    4.04
  16  25   7    0.93    5.29
  16  25   7   -3.96    6.35
 -17 -26  -7   53.48   18.62
  17  26   7   45.61   15.31
  17  26   7   56.84   11.28
 -18 -27  -7    2.45    9.70
  18  27   7   16.84    6.72
  18  27   7   23.48   13.60
 -19 -28  -7   25.49   21.46
  19  28   7   23.43    8.07
  19  28   7   14.60   11.67
 -20 -29  -7   14.11   14.15
  20  29   7   13.36    7.22
  20  29   7   34.51   16.13
  21  30   7   -2.03    8.68
  30  22  -6   30.87   15.83
  30  22  -6   75.26   20.59
  29  21  -6   34.66   15.11
  29  21  -6   -1.89    8.49
 -29 -21   6   -1.10    8.69
  28  20  -6   10.68   10.47
  28  20  -6   17.41   12.60
 -28 -20   6    6.13   10.45
  27  19  -6   23.31   12.13
  27  19  -6    9.30   17.58
 -27 -19   6   43.19   16.33
  26  18  -6   33.93   13.89
  26  18  -6   57.06   16.73
 -26 -18   6   43.23   15.68
  25  17  -6   47.27   16.42
  25  17  -6   78.15   18.95
 -25 -17   6   95.46   21.77
  24  16  -6   60.95   16.32
  24  16  -6   75.67   18.04
 -24 -16   6   60.39   17.50
  23  15  -6  471.44   39.07
  23  15  -6  425.74   35.78
 -23 -15   6  320.65   32.08
  22  14  -6   -3.52    5.60
  22  14  -6    4.75    7.16
 -22 -14   6    1.27    5.95
  21  13  -6   90.70   18.33
  21  13  -6   48.65   16.49
 -21 -13   6   61.07   15.38
  20  12  -6    8.43    6.58
  20  12  -6   11.80    7.81
 -20 -12   6   23.21   10.00
  19  11  -6   57.47   13.48
  19  11  -6   87.16   17.12
  19  11  -6   61.18   14.54
 -19 -11   6   90.61   17.33
  18  10  -6  104.03   15.83
  18  10  -6  115.70   16.12
  18  10  -6  109.60   16.81
 -18 -10   6  110.37   15.91
  17   9  -6   23.34    8.02
  17   9  -6   22.97    8.97
  17   9  -6   45.57   11.89
 -17  -9   6   27.65    8.96
  16   8  -6   10.74    6.74
  16   8  -6    0.73    4.56
  16   8  -6    3.12    5.46
 -16  -8   6    6.17    5.08
  15   7  -6  269.17   22.42
  15   7  -6  282.25   23.31
  15   7  -6  283.07   23.06
  14   6  -6   -3.47    2.85
  14   6  -6    4.80    4.62
  14   6  -6    1.36    3.61
 -14  -6   6   -2.91    2.12
 -14  -6   6   -2.56    2.68
  13   5  -6   16.12    6.31
  13   5  -6   33.20    8.37
  13   5  -6   22.80    7.49
 -13  -5   6   31.40    8.03
 -13  -5   6   39.27    8.74
 -13  -5   6   27.46    7.89
  12   4  -6   67.39   10.15
  12   4  -6   51.60    9.98
  12   4  -6   55.94   10.17
 -12  -4   6   41.66    8.19
 -12  -4   6   41.53    9.15
 -12  -4   6   44.30    9.23
 -12  -4   6   48.79    9.45
  11   3  -6  109.48   12.37
  11   3  -6  105.65   11.20
 -11  -3   6  115.31   10.98
 -11  -3   6   97.37   11.68
 -11  -3   6   87.22   11.50
 -11  -3   6  133.45   12.94
  10   2  -6  136.45   13.57
  10   2  -6  130.33   11.52
 -10  -2   6  143.91   13.26
 -10  -2   6  140.06   11.50
 -10  -2   6  126.42   12.54
 -10  -2   6  152.06   13.89
   9   1  -6  165.24   14.36
   9   1  -6  161.12   11.87
  -9  -1   6  147.63   13.60
  -9  -1   6  168.11   13.84
  -9  -1   6  169.82   14.12
  -9  -1   6  172.77   11.73
   8   0  -6   -1.85    1.74
   8   0  -6    3.51    3.59
   8   0  -6    3.52    3.81
  -8   0   6   -2.32    2.85
  -8   0   6    4.28    3.67
  -8   0   6    1.98    1.91
  -8   0   6    3.79    3.54
   7  -1  -6  610.89   26.58
   7  -1  -6  642.38   31.19
  -7   1   6  675.07   32.99
  -7   1   6  670.60   27.84
  -7   1   6  652.96   33.09
   6  -2  -6    1.89    3.05
   6  -2  -6    0.40    1.29
  -6   2   6   -1.10    3.03
  -6   2   6   -0.72    2.48
  -6   2   6    1.24    1.29
   5  -3  -6  167.18   12.47
   5  -3  -6  132.15   11.04
   5  -3  -6  140.76    6.56
  -5   3   6  132.81    6.22
  -5   3   6  132.09   11.07
  -5   3   6  135.54   11.60
   4  -4  -6    0.11    2.96
   4  -4  -6   -1.30    2.51
   4  -4  -6    0.95    0.97
   4  -4  -6    0.30    1.06
  -4   4   6    2.78    3.19
  -4   4   6    1.99    2.90
   3  -5  -6  156.62   11.85
   3  -5  -6  140.24   11.24
   3  -5  -6  151.55    8.28
   3  -5  -6  136.13    7.71
  -3   5   6  158.01   11.98
  -3   5   6  144.82   11.32
   2  -6  -6   -2.37    2.06
   2  -6  -6   -3.73    2.00
   2  -6  -6    0.18    1.87
  -2   6   6   -1.41    4.58
  -2   6   6   -0.95    1.78
  -2   6   6    6.85    3.04
   1  -7  -6  629.31   30.82
   1  -7  -6  627.33   28.84
   1  -7  -6  635.72   29.57
  -1   7   6  649.62   30.42
  -1   7   6  698.52   30.63
  -1   7   6  641.74   32.02
   0  -8  -6   -2.22    2.19
   0  -8  -6   -1.74    2.24
   0  -8  -6   -1.21    1.89
   0   8   6    1.88    2.94
   0   8   6    4.54    2.83
   0   8   6   -1.08    2.92
  -1  -9  -6  174.16   13.61
  -1  -9  -6  166.38   13.60
   1   9   6  182.11   12.12
   1   9   6  163.87   13.56
   1   9   6  179.44   12.43
   1   9   6  180.86   14.20
  -2 -10  -6  148.69   13.39
  -2 -10  -6  152.36   13.26
   2  10   6  157.96   13.63
   2  10   6  148.26   10.94
   2  10   6  141.13   10.96
   2  10   6  148.37   13.65
  -3 -11  -6   95.96   11.44
  -3 -11  -6  100.80   11.21
   3  11   6  120.68    9.93
   3  11   6  120.00    9.84
   3  11   6  123.11   12.36
   3  11   6   85.25   11.47
  -4 -12  -6   53.63    9.46
  -4 -12  -6   64.05    9.99
   4  12   6   57.02    6.89
   4  12   6   44.89    6.43
   4  12   6   52.92   10.70
   4  12   6   53.65   10.17
  -5 -13  -6   25.42    7.84
  -5 -13  -6   18.79    6.04
   5  13   6   23.50    5.46
   5  13   6   37.35    9.83
   5  13   6   18.75    6.68
   5  13   6   25.28    5.64
  -6 -14  -6    0.46    6.53
   6  14   6    1.11    3.53
   6  14   6   -0.55    2.38
   6  14   6   -2.13    3.54
   6  14   6    1.05    2.64
  -7 -15  -6  286.38   17.96
  -7 -15  -6  247.02   22.77
   7  15   6  322.21   24.03
   7  15   6  286.25   21.54
   7  15   6  282.14   24.74
   7  15   6  277.20   18.32
  -8 -16  -6    0.43    2.99
  -8 -16  -6   -2.30    4.09
   8  16   6    7.69    6.84
   8  16   6    8.64    4.19
   8  16   6    1.78    4.91
  -9 -17  -6   35.02   10.45
  -9 -17  -6   33.25    7.31
   9  17   6   43.91   12.31
   9  17   6   32.29    7.11
   9  17   6   40.19   10.85
 -10 -18  -6  117.37   12.17
 -10 -18  -6  114.74   20.61
  10  18   6  124.06   12.14
  10  18   6  119.90   18.41
  10  18   6  107.43   16.02
 -11 -19  -6   48.50   13.57
 -11 -19  -6   77.79   10.18
  11  19   6   72.20    9.86
  11  19   6   74.13   15.92
 -12 -20  -6    1.31    4.69
 -12 -20  -6   18.80   10.60
  12  20   6   18.49    9.33
  12  20   6    1.80    4.14
 -13 -21  -6   34.06    8.69
 -13 -21  -6   42.14   14.04
  13  21   6   59.99   15.01
  13  21   6   56.58   10.14
 -14 -22  -6   -2.33    3.93
 -14 -22  -6    0.79    7.38
  14  22   6    0.12    5.96
  14  22   6   -0.01    4.07
 -15 -23  -6  353.12   36.05
 -15 -23  -6  400.14   27.10
  15  23   6  428.68   36.57
  15  23   6  398.05   26.63
 -16 -24  -6   66.95   18.35
  16  24   6   53.62   10.96
  16  24   6   34.39   13.63
 -17 -25  -6   63.64   19.62
  17  25   6   71.34   12.68
  17  25   6   63.17   18.30
 -18 -26  -6   32.96   14.82
  18  26   6   48.49   11.07
  18  26   6   31.54   13.34
 -19 -27  -6   28.43   14.78
  19  27   6   31.77    9.19
 -20 -28  -6   20.11   13.09
  20  28   6   38.51   15.81
  20  28   6    4.30    5.75
 -21 -29  -6   -2.84   10.11
  21  29   6   53.07   19.22
  21  29   6   15.58    7.52
  22  30   6   70.73   21.68
  29  22  -5   14.94   11.54
  29  22  -5   14.77   13.24
 -29 -22   5    4.08   12.43
  28  21  -5    7.41    9.43
  28  21  -5   14.23   12.42
 -28 -21   5    8.76   10.99
  27  20  -5    7.56    8.33
  27  20  -5    0.05    8.86
 -27 -20   5    6.79   10.98
  26  19  -5  102.89   23.16
  26  19  -5  109.31   21.76
 -26 -19   5   92.89   23.42
  25  18  -5   54.18   15.72
  25  18  -5   53.90   16.95
 -25 -18   5   54.16   17.48
  24  17  -5   17.54   10.82
  24  17  -5    8.16    8.35
 -24 -17   5    3.31    7.72
  23  16  -5   34.00   12.27
  23  16  -5   38.79   13.30
 -23 -16   5   44.45   15.15
  22  15  -5   83.52   18.19
  22  15  -5  118.58   18.24
 -22 -15   5  120.39   19.50
  21  14  -5  699.88   46.35
  21  14  -5  641.18   45.53
 -21 -14   5  690.96   47.56
  20  13  -5  145.67   18.64
  20  13  -5  141.63   19.18
 -20 -13   5   96.21   18.35
  19  12  -5  245.16   23.30
  19  12  -5  218.77   23.45
  19  12  -5  256.90   27.43
 -19 -12   5  290.63   27.32
  18  11  -5  262.88   23.97
  18  11  -5  272.08   26.62
  18  11  -5  312.79   26.54
 -18 -11   5  275.59   25.43
  17  10  -5  377.44   28.84
  17  10  -5  342.65   26.77
  17  10  -5  305.55   40.25
 -17 -10   5  340.46   28.03
  16   9  -5  341.87   28.14
  16   9  -5  373.15   27.94
  16   9  -5  375.29   27.31
 -16  -9   5  381.70   28.72
  15   8  -5  125.56   15.63
  15   8  -5  122.55   15.14
  15   8  -5  143.92   15.77
 -15  -8   5  143.33   16.25
  14   7  -5  263.61   21.31
  14   7  -5  247.54   21.45
  14   7  -5  253.06   20.49
 -14  -7   5  261.25   21.32
 -14  -7   5  248.25   19.87
  13   6  -5   27.58    7.94
  13   6  -5   25.47    7.97
  13   6  -5   24.29    7.56
 -13  -6   5   26.60    7.63
 -13  -6   5   30.96    8.11
 -13  -6   5   23.44    7.26
  12   5  -5   -3.39    2.16
  12   5  -5    4.70    4.09
  12   5  -5   -5.41    2.21
 -12  -5   5    1.27    3.45
 -12  -5   5    0.64    3.19
 -12  -5   5    2.78    3.73
  11   4  -5  334.64   22.04
  11   4  -5  303.30   21.57
  11   4  -5  322.91   21.84
 -11  -4   5  336.46   22.28
 -11  -4   5  301.46   20.43
 -11  -4   5  307.53   20.82
  10   3  -5  121.91   12.53
  10   3  -5  139.98   12.41
  10   3  -5  154.86   13.68
 -10  -3   5  158.02   13.09
 -10  -3   5  156.20   13.66
 -10  -3   5  178.34   14.49
   9   2  -5 1315.59   57.22
   9   2  -5 1412.66   60.24
  -9  -2   5 1325.30   58.47
  -9  -2   5 1289.80   55.97
  -9  -2   5 1346.36   58.85
  -9  -2   5 1398.89   58.84
   8   1  -5 1227.91   52.33
   8   1  -5 1107.20   48.23
  -8  -1   5 1129.20   51.58
  -8  -1   5 1200.05   52.26
  -8  -1   5 1220.24   52.30
  -8  -1   5 1187.51   48.98
   7   0  -5  137.19   11.60
   7   0  -5  140.55    9.52
  -7   0   5  116.00   16.43
  -7   0   5  163.99   12.29
  -7   0   5  124.31    8.71
  -7   0   5  139.78   11.69
   6  -1  -5  287.31   13.78
   6  -1  -5  294.11   17.88
   6  -1  -5  286.35   17.20
  -6   1   5  267.24   16.61
  -6   1   5  266.48   16.33
  -6   1   5  261.49   12.59
   5  -2  -5  530.11   26.96
   5  -2  -5  558.75   26.54
   5  -2  -5  540.19   21.43
  -5   2   5  535.84   21.35
  -5   2   5  558.83   26.99
   4  -3  -5  186.90   12.76
   4  -3  -5  194.74    7.89
   4  -3  -5  194.37   13.09
  -4   3   5  183.84   12.71
  -4   3   5  194.66   12.92
  -4   3   5  199.32    8.05
   3  -4  -5  202.35    8.91
   3  -4  -5  181.89   12.55
   3  -4  -5  183.59   12.64
   3  -4  -5  198.61    9.15
  -3   4   5  204.60   13.04
  -3   4   5  192.75   12.98
   2  -5  -5  487.51   24.89
   2  -5  -5  536.29   22.75
   2  -5  -5  572.30   26.22
  -2   5   5  511.50   25.68
  -2   5   5  536.51   25.24
  -2   5   5  554.83   23.19
   1  -6  -5  277.78   15.50
   1  -6  -5  263.18   16.23
   1  -6  -5  283.10   14.91
  -1   6   5  248.65   14.71
  -1   6   5  274.02   16.18
  -1   6   5  275.03   14.70
   0  -7  -5  143.33   10.91
   0  -7  -5  152.67   10.51
   0  -7  -5  161.58   11.94
   0   7   5  142.58   10.09
   0   7   5  166.99   11.56
   0   7   5  123.13   10.99
  -1  -8  -5 1200.91   52.30
  -1  -8  -5 1235.24   52.51
   1   8   5 1157.84   51.28
   1   8   5 1215.00   51.61
   1   8   5 1208.82   48.97
   1   8   5 1163.70   49.00
  -2  -9  -5 1343.10   57.85
  -2  -9  -5 1305.66   56.84
   2   9   5 1294.04   57.60
   2   9   5 1326.76   53.99
   2   9   5 1327.85   57.01
   2   9   5 1315.83   53.77
  -3 -10  -5  151.32   12.89
  -3 -10  -5  167.32   14.48
   3  10   5  180.34   11.79
   3  10   5  158.57   20.87
   3  10   5  156.81   13.70
   3  10   5  163.08   11.45
  -4 -11  -5  368.54   24.26
   4  11   5  317.71   17.98
   4  11   5  291.60   21.95
   4  11   5  378.27   22.47
   4  11   5  301.36   17.60
  -5 -12  -5   -3.75    3.15
  -5 -12  -5   -1.71    2.52
  -5 -12  -5    4.73    2.92
   5  12   5   -1.69    3.53
   5  12   5   -4.74    2.16
   5  12   5    3.64    2.85
  -6 -13  -5   31.38    6.27
  -6 -13  -5   34.97    8.76
  -6 -13  -5   19.10    6.57
   6  13   5   20.68    7.68
   6  13   5   24.91    5.42
   6  13   5   29.17    7.70
  -7 -14  -5  198.26   19.62
  -7 -14  -5  237.98   15.83
   7  14   5  246.84   20.16
   7  14   5  222.06   21.32
   7  14   5  243.61   16.73
  -8 -15  -5  117.15   11.34
  -8 -15  -5  140.59   16.64
   8  15   5  154.52   18.20
   8  15   5  146.10   12.20
   8  15   5   97.62   13.63
  -9 -16  -5  346.49   21.93
  -9 -16  -5  388.63   30.03
   9  16   5  403.02   29.06
   9  16   5  415.78   23.75
   9  16   5  359.20   31.38
 -10 -17  -5  378.16   30.61
 -10 -17  -5  371.50   23.25
  10  17   5  282.10   27.73
  10  17   5  368.54   28.05
  10  17   5  343.45   21.56
 -11 -18  -5  297.60   27.93
 -11 -18  -5  264.27   19.36
  11  18   5  268.04   25.15
  11  18   5  301.45   20.58
  11  18   5  337.28   30.35
 -12 -19  -5  245.38   25.62
 -12 -19  -5  213.73   20.22
  12  19   5  243.95   24.28
  12  19   5  238.43   18.52
 -13 -20  -5  132.70   13.98
 -13 -20  -5  126.93   19.96
  13  20   5  147.89   14.61
  13  20   5  135.10   18.66
 -14 -21  -5  646.51   37.14
 -14 -21  -5  706.20   49.72
  14  21   5  723.52   46.84
  14  21   5  624.80   36.16
 -15 -22  -5  115.52   22.67
 -15 -22  -5   97.40   13.41
  15  22   5  130.06   14.40
  15  22   5  129.28   20.18
 -16 -23  -5   34.07   14.30
  16  23   5   40.00    9.82
  16  23   5   68.92   17.80
 -17 -24  -5   17.15   11.33
  17  24   5   33.25   13.65
  17  24   5    5.88    5.42
 -18 -25  -5   41.42   15.84
  18  25   5   57.06   11.80
  18  25   5   62.20   17.58
 -19 -26  -5  112.29   25.24
  19  26   5  124.00   24.04
  19  26   5   61.93   12.86
 -20 -27  -5   -2.49    8.54
  20  27   5    7.72    7.02
  20  27   5   14.42   11.06
 -21 -28  -5   25.91   15.97
  21  28   5   19.20   13.75
  21  28   5   50.37   12.03
 -22 -29  -5   48.61   23.58
  22  29   5   21.17    9.30
  22  29   5    2.20    8.84
  29  23  -4   17.11   13.15
  29  23  -4   26.86   13.13
 -29 -23   4   50.06   22.81
  28  22  -4   48.00   17.54
  28  22  -4   95.95   20.93
 -28 -22   4   58.65   19.18
  27  21  -4   54.00   17.30
  27  21  -4   34.00   13.91
 -27 -21   4   15.36   12.64
  26  20  -4   67.47   17.74
  26  20  -4   62.48   19.33
 -26 -20   4   60.84   18.73
  25  19  -4   25.03   12.32
  25  19  -4   31.34   11.96
 -25 -19   4   38.70   15.41
  24  18  -4  491.74   43.75
  24  18  -4  694.54   45.37
 -24 -18   4  537.54   45.24
  23  17  -4    0.40    6.53
  23  17  -4    1.56    5.84
 -23 -17   4    7.62    8.05
  22  16  -4   52.41   14.86
  22  16  -4   50.96   13.75
 -22 -16   4   82.42   18.55
  21  15  -4  320.54   28.04
  21  15  -4  296.16   29.32
 -21 -15   4  353.66   32.61
  20  14  -4  185.65   20.67
  20  14  -4  175.36   21.81
 -20 -14   4  168.10   21.62
  19  13  -4  104.24   18.75
  19  13  -4   92.61   14.56
 -19 -13   4   72.18   15.78
  18  12  -4   36.89   11.80
  18  12  -4   21.33    8.35
  18  12  -4   45.51   13.61
 -18 -12   4    4.29    6.54
  17  11  -4  295.66   24.07
  17  11  -4  250.44   23.86
  17  11  -4  309.52   27.36
 -17 -11   4  286.16   26.08
  16  10  -4  515.97   34.50
  16  10  -4  531.99   33.43
  16  10  -4  478.16   35.21
 -16 -10   4  479.70   33.97
  15   9  -4    6.66    5.72
  15   9  -4   19.48    7.61
  15   9  -4   11.67    6.93
 -15  -9   4    0.83    3.77
 -15  -9   4   17.50    7.47
  14   8  -4   40.90    9.61
  14   8  -4   61.39   12.25
  14   8  -4   43.43   10.06
 -14  -8   4   58.88   10.82
 -14  -8   4   67.11   15.50
  13   7  -4   77.17   11.23
  13   7  -4  106.91   13.44
  13   7  -4   84.18   11.35
 -13  -7   4   97.51   12.41
 -13  -7   4   71.10    9.87
 -13  -7   4   67.33   10.34
  12   6  -4   48.86   10.20
  12   6  -4   59.84    9.44
  12   6  -4   41.14    9.05
 -12  -6   4   27.86    7.41
 -12  -6   4   37.42    8.25
  11   5  -4  356.04   22.60
  11   5  -4  323.36   21.73
  11   5  -4  294.60   21.47
 -11  -5   4  300.43   24.11
 -11  -5   4  328.05   21.10
 -11  -5   4  316.63   21.32
  10   4  -4   -2.53    2.45
  10   4  -4    3.00    3.66
  10   4  -4   -0.45    2.93
 -10  -4   4   -0.89    2.56
 -10  -4   4    3.50    3.96
 -10  -4   4   -0.68    2.98
   9   3  -4 1568.79   65.72
   9   3  -4 1534.85   64.75
   9   3  -4 1504.10   65.21
  -9  -3   4 1558.83   66.00
  -9  -3   4 1518.70   65.53
  -9  -3   4 1588.00   65.22
   8   2  -4  338.45   23.26
   8   2  -4  308.51   18.67
   8   2  -4  364.85   20.55
  -8  -2   4  284.19   17.91
  -8  -2   4  287.54   16.74
  -8  -2   4  269.67   17.42
   7   1  -4  423.76   22.83
   7   1  -4  399.21   20.37
  -7  -1   4  394.91   22.00
  -7  -1   4  422.00   20.27
  -7  -1   4  445.88   22.56
  -7  -1   4  357.30   21.16
   6   0  -4   34.94    4.66
   6   0  -4   36.46    5.90
   6   0  -4   33.13    6.37
  -6   0   4   41.69    7.04
  -6   0   4   40.74    6.19
  -6   0   4   47.36    6.73
  -6   0   4   36.55    4.50
   5  -1  -4  173.23    8.67
   5  -1  -4  156.06   11.34
   5  -1  -4  153.27   11.55
  -5   1   4  161.07   11.59
  -5   1   4  172.77   11.61
  -5   1   4  162.20    8.33
   4  -2  -4    0.27    0.71
   4  -2  -4   -0.48    2.44
   4  -2  -4    1.93    2.56
  -4   2   4    0.40    2.55
  -4   2   4   -0.40    2.67
  -4   2   4   -0.46    0.80
   3  -3  -4    0.16    0.79
   3  -3  -4   -1.52    2.28
   3  -3  -4   -0.92    0.52
   3  -3  -4   -4.74    1.59
  -3   3   4   -3.14    2.03
  -3   3   4   -0.25    2.19
   2  -4  -4   -2.31    1.55
   2  -4  -4   -2.57    1.65
   2  -4  -4   -3.66    2.02
  -2   4   4    1.23    1.46
  -2   4   4   -0.14    2.43
  -2   4   4    1.14    2.17
   1  -5  -4  159.57   10.85
   1  -5  -4  158.29   10.31
   1  -5  -4  164.25    9.63
  -1   5   4  174.41   11.39
  -1   5   4  168.33   10.00
  -1   5   4  158.95   10.37
   0  -6  -4   48.12    6.03
   0  -6  -4   48.86    5.60
   0  -6  -4   36.43    5.62
   0   6   4   34.43    5.66
   0   6   4   38.77    5.78
   0   6   4   49.39    5.42
  -1  -7  -4  433.25   22.27
  -1  -7  -4  410.30   21.84
   1   7   4  422.90   21.68
   1   7   4  409.09   19.72
   1   7   4  404.76   21.68
   1   7   4  388.49   19.74
  -2  -8  -4  310.26   19.10
  -2  -8  -4  317.56   18.40
   2   8   4  289.85   18.87
   2   8   4  307.02   16.27
   2   8   4  305.41   16.23
   2   8   4  319.23   21.17
  -3  -9  -4 1547.48   62.31
  -3  -9  -4 1586.66   65.41
  -3  -9  -4 1548.32   66.81
   3   9   4 1500.00   67.11
   3   9   4 1554.09   62.53
   3   9   4 1614.17   63.00
   3   9   4 1596.64   66.04
  -4 -10  -4    4.65    4.17
  -4 -10  -4   -2.51    1.69
  -4 -10  -4    1.16    3.03
   4  10   4   -0.52    3.37
   4  10   4    0.50    2.20
   4  10   4   -0.25    2.69
  -5 -11  -4  257.79   20.58
  -5 -11  -4  319.87   17.75
  -5 -11  -4  323.42   20.78
   5  11   4  332.68   21.50
   5  11   4  338.22   18.51
   5  11   4  302.01   22.59
  -6 -12  -4   55.39    8.66
  -6 -12  -4   47.43    6.65
  -6 -12  -4   49.12   11.02
   6  12   4   44.24    9.91
   6  12   4   56.72   10.08
   6  12   4   41.41    6.37
  -7 -13  -4   86.00   12.27
  -7 -13  -4   90.34    9.10
  -7 -13  -4   77.79   10.41
   7  13   4   82.64   14.81
   7  13   4   95.54   12.09
   7  13   4  103.92    9.77
  -8 -14  -4   52.78    7.58
  -8 -14  -4   79.23   12.54
   8  14   4   76.05    8.75
   8  14   4   80.20   11.47
   8  14   4   60.75   12.98
  -9 -15  -4   14.42    5.07
  -9 -15  -4    4.18    5.71
   9  15   4    8.79    6.17
   9  15   4   14.86    5.17
   9  15   4    7.63    7.25
 -10 -16  -4  494.86   35.17
 -10 -16  -4  485.93   27.56
  10  16   4  464.50   32.65
  10  16   4  484.66   36.17
  10  16   4  552.07   28.92
 -11 -17  -4  251.53   18.57
 -11 -17  -4  255.51   25.31
  11  17   4  326.88   28.78
  11  17   4  250.19   23.41
  11  17   4  264.71   19.21
 -12 -18  -4   36.40    8.99
 -12 -18  -4   10.97    8.33
  12  18   4   34.65   10.59
  12  18   4   32.12    8.11
 -13 -19  -4   62.23   10.87
 -13 -19  -4   63.80   15.56
  13  19   4   91.75   11.97
  13  19   4  101.10   18.34
 -14 -20  -4  100.97   20.74
 -14 -20  -4  165.88   16.10
  14  20   4  192.85   17.28
  14  20   4  155.26   20.75
 -15 -21  -4  360.11   38.91
 -15 -21  -4  282.31   23.52
  15  21   4  340.57   25.05
  15  21   4  411.91   33.92
 -16 -22  -4   68.38   18.02
  16  22   4   47.92   15.17
  16  22   4   70.53   12.96
 -17 -23  -4   -1.64    7.37
  17  23   4   -1.32    6.52
  17  23   4    6.21    5.84
 -18 -24  -4  496.38   44.04
  18  24   4  440.85   39.32
  18  24   4  503.75   32.64
 -19 -25  -4   19.10   13.02
  19  25   4   16.49   10.84
  19  25   4   23.22    9.17
 -20 -26  -4   76.51   21.12
  20  26   4   43.12   11.74
  20  26   4   56.76   17.78
 -21 -27  -4   27.25   15.63
  21  27   4   46.07   11.86
  21  27   4   42.27   16.44
 -22 -28  -4   80.54   22.60
  22  28   4   62.51   13.92
  22  28   4   60.61   18.96
  23  29   4   41.25   17.13
  29  24  -3  109.84   22.44
  29  24  -3   51.39   19.00
  28  23  -3  135.21   28.21
  28  23  -3  119.87   22.63
 -28 -23   3  117.33   27.31
  27  22  -3    2.30    9.00
  27  22  -3    1.05    7.93
 -27 -22   3   22.23   14.47
  26  21  -3   10.69   14.93
  26  21  -3    6.89    8.24
 -26 -21   3    2.50    9.67
  25  20  -3  271.15   32.12
  25  20  -3  284.40   28.73
 -25 -20   3  295.57   34.54
  24  19  -3  166.88   21.97
  24  19  -3  196.98   26.51
 -24 -19   3  249.40   30.48
  23  18  -3   33.47   12.70
  23  18  -3   27.91   12.06
 -23 -18   3   42.28   15.66
  22  17  -3  106.39   20.66
 -22 -17   3   98.83   21.06
  21  16  -3  129.57   17.55
  21  16  -3   63.80   16.51
 -21 -16   3   83.17   18.77
  20  15  -3  183.73   19.99
  20  15  -3  143.33   20.41
 -20 -15   3  142.00   20.74
  19  14  -3   59.71   13.49
  19  14  -3   64.18   15.12
 -19 -14   3   71.77   16.31
  18  13  -3   87.60   13.50
 -18 -13   3   90.24   17.51
  17  12  -3  103.44   18.47
  17  12  -3   88.20   15.62
  17  12  -3   99.31   16.28
 -17 -12   3   83.90   16.66
  16  11  -3   32.14    9.17
  16  11  -3   53.00   20.52
  16  11  -3   52.74   11.47
 -16 -11   3   60.78   13.45
  15  10  -3   81.51   12.85
  15  10  -3   65.11   14.13
  15  10  -3   95.80   12.78
 -15 -10   3   61.40   11.34
 -15 -10   3   55.23   12.30
  14   9  -3  335.10   22.89
  14   9  -3  266.12   23.67
  14   9  -3  264.55   22.06
 -14  -9   3  327.68   25.20
 -14  -9   3  312.42   22.14
  13   8  -3    3.55    4.11
  13   8  -3   11.05    5.93
  13   8  -3   33.62    8.95
 -13  -8   3   14.38    6.10
 -13  -8   3    8.14    5.48
 -13  -8   3   15.43    5.71
  12   7  -3   39.55    8.47
  12   7  -3   38.27    9.01
  12   7  -3   40.41    8.95
 -12  -7   3   45.55    9.08
 -12  -7   3   49.13    9.15
 -12  -7   3   57.73   10.65
  11   6  -3   97.13   12.30
  11   6  -3   99.25   11.01
  11   6  -3  138.79   13.32
 -11  -6   3  112.93   12.00
 -11  -6   3  107.66   11.08
 -11  -6   3  125.17   13.09
  10   5  -3  143.70   12.91
  10   5  -3  158.79   13.93
  10   5  -3  168.03   14.75
 -10  -5   3  141.55   13.57
 -10  -5   3  164.13   13.35
 -10  -5   3  182.48   14.47
   9   4  -3 1621.00   67.58
   9   4  -3 1598.85   67.55
   9   4  -3 1534.11   66.44
  -9  -4   3 1629.39   66.71
  -9  -4   3 1575.00   66.16
  -9  -4   3 1491.39   65.07
   8   3  -3    0.51    2.95
   8   3  -3    1.37    2.94
   8   3  -3   -1.16    2.96
  -8  -3   3   -1.84    2.22
  -8  -3   3    0.31    2.89
  -8  -3   3   -4.27    2.14
   7   2  -3  132.95   10.78
   7   2  -3  134.01   10.90
   7   2  -3  124.98   10.28
  -7  -2   3  121.64   10.30
  -7  -2   3  115.72    9.95
  -7  -2   3  126.37    9.89
   6   1  -3 1370.99   55.26
   6   1  -3 1352.81   53.77
   6   1  -3 1297.62   55.12
  -6  -1   3 1316.66   54.17
  -6  -1   3 1321.64   54.10
  -6  -1   3 1303.89   52.45
   5   0  -3  409.63   20.22
   5   0  -3  379.47   17.67
  -5   0   3  410.40   20.11
  -5   0   3  366.84   19.76
  -5   0   3  421.86   18.09
  -5   0   3  398.92   20.01
   4  -1  -3   73.73    6.95
   4  -1  -3   71.34    6.57
   4  -1  -3   69.14    4.44
  -4   1   3   79.41    4.45
  -4   1   3   55.66    6.23
  -4   1   3   68.06    6.79
   3  -2  -3  519.26   23.29
   3  -2  -3  528.61   23.74
  -3   2   3  503.16   22.77
  -3   2   3  513.08   23.08
   2  -3  -3  525.00   20.27
   2  -3  -3  525.32   23.28
   2  -3  -3  516.02   23.16
  -2   3   3  544.63   23.14
  -2   3   3  487.47   22.75
  -2   3   3  515.08   20.09
   1  -4  -3   83.11    6.42
   1  -4  -3   62.86    5.17
   1  -4  -3   70.78    6.28
  -1   4   3   90.17    6.72
  -1   4   3   84.07    6.77
  -1   4   3   73.36    5.64
   0  -5  -3  399.50   18.77
   0  -5  -3  418.89   19.90
   0  -5  -3  403.71   19.25
   0   5   3  392.46   18.49
   0   5   3  389.99   19.06
   0   5   3  417.04   19.63
  -1  -6  -3 1332.00   54.64
  -1  -6  -3 1374.84   55.31
   1   6   3 1376.00   53.44
   1   6   3 1339.29   55.39
   1   6   3 1333.87   53.46
   1   6   3 1371.37   54.92
  -2  -7  -3  125.21    9.97
  -2  -7  -3  117.37    8.59
  -2  -7  -3  129.46   10.99
   2   7   3  130.64   11.12
   2   7   3  127.04    8.77
   2   7   3  101.56    9.35
  -3  -8  -3    2.35    2.35
  -3  -8  -3   -4.07    2.25
  -3  -8  -3    3.03    2.73
   3   8   3   -3.59    2.72
   3   8   3   -2.78    2.44
   3   8   3    0.90    2.08
  -4  -9  -3 1581.66   65.17
  -4  -9  -3 1591.81   62.54
  -4  -9  -3 1494.38   66.98
   4   9   3 1584.57   65.22
   4   9   3 1553.10   67.46
   4   9   3 1507.87   61.88
  -5 -10  -3  160.13   13.02
  -5 -10  -3  156.94   11.26
  -5 -10  -3  154.96   14.44
   5  10   3  184.58   14.47
   5  10   3  151.76   11.38
   5  10   3  167.80   15.47
  -6 -11  -3   96.33   12.45
  -6 -11  -3  107.39    9.40
  -6 -11  -3  105.81   12.82
   6  11   3  105.97   13.09
   6  11   3  122.81   10.07
   6  11   3   98.53   11.45
  -7 -12  -3   63.01   12.19
  -7 -12  -3   44.61    6.69
  -7 -12  -3   33.11    7.63
   7  12   3   48.89    9.44
   7  12   3   59.47   11.90
   7  12   3   45.00    6.73
  -8 -13  -3   13.99    5.03
  -8 -13  -3   13.56    7.06
  -8 -13  -3   18.30    5.07
   8  13   3   17.63    6.49
   8  13   3   21.04    5.53
   8  13   3   20.76    7.59
  -9 -14  -3  273.67   23.78
  -9 -14  -3  300.32   19.07
   9  14   3  328.59   26.29
   9  14   3  278.14   18.73
   9  14   3  294.93   22.75
 -10 -15  -3   47.79    8.85
 -10 -15  -3   72.28   14.90
  10  15   3   79.18   12.16
  10  15   3   73.72   14.53
  10  15   3   75.05    9.70
 -11 -16  -3   46.02   12.72
 -11 -16  -3   38.87    8.29
  11  16   3   46.11   10.74
  11  16   3   49.31    8.92
  11  16   3   33.99   11.18
 -12 -17  -3   83.61   17.08
 -12 -17  -3   76.67   10.69
  12  17   3   90.44   18.16
  12  17   3   89.35   11.34
  12  17   3  104.69   15.19
 -13 -18  -3   63.42    9.95
 -13 -18  -3   52.19   14.57
  13  18   3   49.67   12.81
  13  18   3   70.74   10.42
 -14 -19  -3   67.14   11.97
 -14 -19  -3   80.71   18.70
  14  19   3  102.60   16.38
  14  19   3   86.18   12.12
 -15 -20  -3  179.33   23.93
  15  20   3  166.03   21.25
  15  20   3  183.84   17.56
 -16 -21  -3  123.71   24.02
  16  21   3  117.76   18.84
  16  21   3  112.93   14.52
 -17 -22  -3  101.16   21.82
  17  22   3  109.69   21.10
  17  22   3   84.68   14.57
 -18 -23  -3   11.03   10.89
  18  23   3   34.21   10.34
  18  23   3   28.83   12.09
 -19 -24  -3  194.92   27.38
  19  24   3  250.28   29.29
  19  24   3  233.13   22.15
 -20 -25  -3  293.24   35.06
  20  25   3  296.31   32.58
  20  25   3  246.32   23.40
 -21 -26  -3   15.40   11.37
  21  26   3   13.12    8.07
  21  26   3   -2.71    9.70
 -22 -27  -3   15.65   13.26
  22  27   3   13.87   10.76
 -23 -28  -3  102.60   26.69
  23  28   3  132.80   18.95
  23  28   3  171.93   31.69
  24  29   3   94.25   23.52
  24  29   3   84.09   16.53
  28  24  -2   19.18   13.35
  28  24  -2    7.32    9.83
 -28 -24   2   -1.77   10.85
  27  23  -2   -1.06    8.15
  27  23  -2    2.25    7.85
 -27 -23   2    1.57    9.17
  26  22  -2   64.63   15.94
  26  22  -2   10.70   10.01
 -26 -22   2   36.73   16.77
  25  21  -2   51.88   14.18
  25  21  -2   47.79   17.06
 -25 -21   2   82.19   21.84
  24  20  -2   14.32   10.59
  24  20  -2   31.38   11.77
 -24 -20   2    3.91    9.19
  23  19  -2  140.36   19.77
  23  19  -2  106.11   22.16
 -23 -19   2   97.12   23.18
  22  18  -2  268.21   25.95
  22  18  -2  285.89   29.78
 -22 -18   2  275.78   31.04
  21  17  -2  275.33   28.96
  21  17  -2  302.67   26.27
 -21 -17   2  287.57   30.51
  20  16  -2  306.88   29.27
  20  16  -2  270.29   24.79
 -20 -16   2  292.07   30.39
  19  15  -2  534.41   35.29
  19  15  -2  501.74   38.06
 -19 -15   2  460.43   37.68
  18  14  -2  128.86   18.09
  18  14  -2  150.00   17.09
 -18 -14   2  163.24   20.89
  17  13  -2  307.22   26.74
  17  13  -2  280.96   23.21
  17  13  -2  287.20   28.05
 -17 -13   2  308.06   28.21
  16  12  -2  188.01   18.02
  16  12  -2  178.28   19.64
  16  12  -2  219.93   23.15
 -16 -12   2  209.31   21.82
 -16 -12   2  165.88   18.97
  15  11  -2   33.21    8.82
  15  11  -2   37.46   10.23
  15  11  -2   29.14   10.34
 -15 -11   2   33.54   10.30
 -15 -11   2   33.12    8.48
  14  10  -2  120.59   13.55
  14  10  -2  121.77   15.90
  14  10  -2  130.55   15.03
 -14 -10   2  110.04   12.32
 -14 -10   2  111.16   14.73
  13   9  -2  335.20   24.82
  13   9  -2  337.19   23.04
  13   9  -2  369.41   27.11
 -13  -9   2  373.44   27.16
  12   8  -2  582.05   35.82
  12   8  -2  610.86   32.85
  12   8  -2  622.42   34.94
 -12  -8   2  541.32   32.34
 -12  -8   2  632.54   35.76
 -12  -8   2  607.09   31.82
  11   7  -2  287.89   21.36
  11   7  -2  288.70   20.35
  11   7  -2  233.63   17.67
 -11  -7   2  279.15   20.79
 -11  -7   2  270.73   18.16
 -11  -7   2  248.05   18.65
  10   6  -2  128.49   12.62
  10   6  -2  115.54   12.91
  10   6  -2  142.01   12.25
 -10  -6   2  153.85   13.35
 -10  -6   2  146.96   12.31
 -10  -6   2  145.33   14.02
   9   5  -2 1224.28   58.15
   9   5  -2 1325.35   56.52
   9   5  -2 1271.46   57.23
  -9  -5   2 1305.31   56.24
  -9  -5   2 1333.86   58.76
  -9  -5   2 1340.52   57.59
   8   4  -2  277.99   18.16
   8   4  -2  301.48   19.21
   8   4  -2  308.59   18.05
  -8  -4   2  259.11   17.08
  -8  -4   2  290.19   16.81
  -8  -4   2  272.40   17.87
   7   3  -2  125.74   10.11
   7   3  -2  133.01   10.63
   7   3  -2  104.37   10.16
  -7  -3   2  114.15    9.49
  -7  -3   2  115.90   10.21
  -7  -3   2   96.80    9.21
   6   2  -2    0.28    2.61
   6   2  -2    0.63    2.78
   6   2  -2   -1.07    2.26
  -6  -2   2    3.16    2.94
  -6  -2   2    0.58    2.83
  -6  -2   2    1.38    2.42
   5   1  -2  630.05   27.86
   5   1  -2  618.63   27.76
   5   1  -2  616.23   27.02
  -5  -1   2  609.02   27.42
  -5  -1   2  639.82   26.98
  -5  -1   2  602.74   27.50
   4   0  -2  274.62   14.29
   4   0  -2  271.81   12.81
  -4   0   2  251.00   13.39
  -4   0   2  250.65   13.46
  -4   0   2  262.59   13.47
  -4   0   2  248.75   11.95
   3  -1  -2  381.51   17.59
   3  -1  -2  383.17   15.21
   3  -1  -2  395.76   18.01
  -3   1   2  360.47   16.76
  -3   1   2  363.18   14.54
  -3   1   2  377.80   17.18
   2  -2  -2   -0.16    1.48
   2  -2  -2    3.01    1.80
  -2   2   2    2.71    3.18
  -2   2   2    0.43    1.43
   1  -3  -2  391.30   17.00
   1  -3  -2  375.81   15.80
   1  -3  -2  362.88   16.73
  -1   3   2  358.49   17.05
  -1   3   2  403.60   17.22
  -1   3   2  383.31   15.90
   0  -4  -2  267.43   13.20
   0  -4  -2  251.38   12.62
   0   4   2  255.11   13.72
   0   4   2  255.63   12.76
   0   4   2  238.42   12.54
  -1  -5  -2  616.06   27.10
  -1  -5  -2  643.88   28.03
  -1  -5  -2  619.29   26.67
   1   5   2  642.05   26.82
   1   5   2  641.46   27.72
   1   5   2  625.66   28.34
  -2  -6  -2    3.29    3.05
  -2  -6  -2   -2.52    1.62
  -2  -6  -2   -0.52    2.35
   2   6   2    1.37    1.95
   2   6   2    0.11    2.40
   2   6   2   -1.43    2.66
  -3  -7  -2  118.88    8.61
  -3  -7  -2  127.84   11.22
  -3  -7  -2  128.91    9.80
   3   7   2  126.82   10.23
   3   7   2  123.85   11.11
   3   7   2  122.94    8.83
  -4  -8  -2  291.87   19.17
  -4  -8  -2  295.49   15.78
  -4  -8  -2  279.13   17.17
   4   8   2  328.16   19.20
   4   8   2  290.05   19.60
   4   8   2  311.62   16.58
  -5  -9  -2 1278.72   55.44
  -5  -9  -2 1307.80   58.42
  -5  -9  -2 1304.62   53.39
   5   9   2 1301.28   54.06
   5   9   2 1296.00   59.21
   5   9   2 1343.26   56.88
  -6 -10  -2  149.05   12.45
  -6 -10  -2  117.65   13.16
  -6 -10  -2  147.95   10.86
   6  10   2  129.16   13.87
   6  10   2  134.67   10.63
   6  10   2  137.13   12.41
  -7 -11  -2  292.56   17.45
  -7 -11  -2  267.60   21.11
   7  11   2  259.81   21.30
   7  11   2  277.43   17.05
   7  11   2  260.58   19.00
  -8 -12  -2  586.45   33.56
  -8 -12  -2  725.38   39.04
  -8 -12  -2  632.08   31.54
   8  12   2  677.48   36.52
   8  12   2  688.39   36.88
   8  12   2  638.08   38.86
  -9 -13  -2  354.34   26.49
  -9 -13  -2  317.05   22.54
  -9 -13  -2  346.02   20.84
   9  13   2  336.81   23.94
   9  13   2  325.79   26.50
   9  13   2  356.78   21.35
 -10 -14  -2  105.27   10.95
 -10 -14  -2  108.91   14.96
  10  14   2  126.99   12.21
  10  14   2  127.88   14.36
  10  14   2   94.93   14.88
 -11 -15  -2   28.91    7.00
 -11 -15  -2   25.69    9.07
  11  15   2   39.94    8.46
  11  15   2   49.64   11.29
 -12 -16  -2  203.00   22.14
 -12 -16  -2  181.95   15.95
  12  16   2  169.62   20.86
  12  16   2  193.19   19.76
  12  16   2  214.38   17.28
 -13 -17  -2  232.57   25.32
 -13 -17  -2  302.20   21.29
  13  17   2  309.67   22.39
  13  17   2  300.03   26.02
  13  17   2  323.73   35.36
 -14 -18  -2  104.49   13.05
 -14 -18  -2  128.48   19.61
  14  18   2  160.84   16.07
  14  18   2  148.54   32.92
 -15 -19  -2  556.16   42.44
  15  19   2  539.77   33.41
  15  19   2  560.04   39.47
 -16 -20  -2  217.72   26.37
  16  20   2  225.91   25.82
  16  20   2  306.91   23.38
 -17 -21  -2  272.29   30.46
  17  21   2  298.05   29.21
  17  21   2  267.53   22.99
 -18 -22  -2  271.83   30.98
  18  22   2  269.93   23.63
  18  22   2  304.06   30.61
 -19 -23  -2  104.09   22.27
  19  23   2  104.86   15.43
  19  23   2  121.00   23.58
 -20 -24  -2   13.22   10.43
  20  24   2    9.66    9.35
  20  24   2   19.35    8.63
 -21 -25  -2   84.69   22.56
  21  25   2   63.92   13.98
  21  25   2   79.69   20.20
  22  26   2   42.24   12.47
  22  26   2   21.64   13.68
 -23 -27  -2    0.75    9.07
  23  27   2   -3.85    6.62
  23  27   2   -3.50    6.02
  24  28   2   12.12    9.27
  24  28   2    7.82   10.40
  28  25  -1   13.53   10.68
  28  25  -1   -0.76    9.49
  27  24  -1  284.90   29.21
  27  24  -1  257.65   33.86
 -27 -24   1  289.79   37.90
  26  23  -1    8.30    8.25
  26  23  -1   11.93   10.78
 -26 -23   1   24.50   13.34
  25  22  -1   97.47   18.89
 -25 -22   1   71.19   20.13
  24  21  -1  132.25   19.32
  24  21  -1  103.59   22.74
 -24 -21   1   82.63   21.31
  23  20  -1  130.02   18.65
  23  20  -1  106.30   21.91
 -23 -20   1  147.94   24.57
  22  19  -1   97.64   16.03
  22  19  -1  115.33   22.90
 -22 -19   1  112.51   22.92
  21  18  -1   87.25   16.14
  21  18  -1   91.64   19.75
 -21 -18   1   66.23   17.73
  20  17  -1  161.66   21.70
  20  17  -1  112.53   16.32
 -20 -17   1  111.62   25.68
  19  16  -1  483.70   33.56
  19  16  -1  519.79   38.86
 -19 -16   1  501.70   40.11
  18  15  -1   46.18   12.16
  18  15  -1   89.44   13.32
 -18 -15   1   90.51   19.13
  17  14  -1  252.41   24.78
  17  14  -1  228.89   20.34
 -17 -14   1  241.96   25.46
  16  13  -1   90.88   12.50
  16  13  -1   73.61   16.19
  16  13  -1  103.19   15.23
 -16 -13   1   94.38   12.46
 -16 -13   1  109.27   16.50
  15  12  -1  149.12   19.82
  15  12  -1  141.02   14.90
  15  12  -1  186.57   19.00
 -15 -12   1  133.92   13.98
 -15 -12   1  147.66   18.30
  14  11  -1    5.77    4.32
  14  11  -1   19.95    8.87
  14  11  -1   16.68    7.16
 -14 -11   1   16.82    7.12
 -14 -11   1   12.05    5.05
  13  10  -1    3.86    5.36
  13  10  -1    6.43    5.71
  13  10  -1    1.14    3.55
 -13 -10   1    9.62    4.45
 -13 -10   1   13.91    6.84
  12   9  -1 1443.81   65.83
  12   9  -1 1362.03   67.62
  12   9  -1 1438.15   62.66
 -12  -9   1 1317.77   64.70
 -12  -9   1 1384.30   62.61
 -12  -9   1 1365.29   59.70
  11   8  -1  386.88   25.25
  11   8  -1  396.94   27.16
  11   8  -1  399.74   23.50
 -11  -8   1  420.38   25.88
 -11  -8   1  422.08   27.84
 -11  -8   1  420.25   24.03
  10   7  -1  227.97   15.68
  10   7  -1  207.72   16.60
  10   7  -1  198.69   17.73
 -10  -7   1  182.26   13.89
 -10  -7   1  218.03   17.74
 -10  -7   1  215.92   16.10
   9   6  -1  199.05   16.06
   9   6  -1  158.31   14.02
   9   6  -1  187.81   13.48
  -9  -6   1  164.38   14.75
  -9  -6   1  188.59   14.32
  -9  -6   1  168.01   12.55
   8   5  -1 1071.78   47.48
   8   5  -1 1138.79   51.06
   8   5  -1 1148.72   49.76
  -8  -5   1 1172.92   50.53
  -8  -5   1 1254.75   52.71
  -8  -5   1 1199.22   53.80
   7   4  -1  409.10   21.30
   7   4  -1  436.95   22.82
   7   4  -1  430.98   23.71
  -7  -4   1  398.12   21.28
  -7  -4   1  391.92   20.18
   6   3  -1 1297.54   54.42
   6   3  -1 1280.51   53.35
   6   3  -1 1408.11   55.74
  -6  -3   1 1386.57   55.67
  -6  -3   1 1321.34   54.34
  -6  -3   1 1374.45   56.40
   5   2  -1  594.54   27.00
   5   2  -1  604.15   27.41
   5   2  -1  606.75   26.49
  -5  -2   1  602.26   26.91
  -5  -2   1  587.60   25.87
  -5  -2   1  582.31   26.44
   4   1  -1    0.82    1.82
   4   1  -1    1.37    1.93
   4   1  -1   -0.90    1.85
  -4  -1   1    1.75    1.93
  -4  -1   1   -0.05    1.95
  -4  -1   1    0.69    1.76
   3   0  -1  577.89   23.89
   3   0  -1  576.91   23.84
   3   0  -1  566.50   23.05
  -3   0   1  562.62   23.44
   2  -1  -1   -0.31    0.81
   1  -2  -1    1.76    1.00
   0  -3  -1  590.93   23.43
   0  -3  -1  567.13   25.29
   0  -3  -1  570.09   23.49
   0   3   1  578.97   23.87
   0   3   1  557.43   23.96
   0   3   1  584.88   24.05
   0   3   1  658.29   24.90
  -1  -4  -1   -1.83    1.32
  -1  -4  -1   -0.18    1.61
  -1  -4  -1    2.21    1.63
   1   4   1    0.43    1.66
   1   4   1   -0.15    1.60
   1   4   1   -1.25    1.73
  -2  -5  -1  626.03   26.61
  -2  -5  -1  588.61   25.63
  -2  -5  -1  613.84   27.83
   2   5   1  644.66   27.00
   2   5   1  609.59   26.02
   2   5   1  590.53   28.01
  -3  -6  -1 1319.76   53.24
  -3  -6  -1 1303.19   52.11
  -3  -6  -1 1337.39   55.27
   3   6   1 1351.82   53.91
   3   6   1 1362.99   56.98
   3   6   1 1385.45   55.20
  -4  -7  -1  399.63   20.86
  -4  -7  -1  411.63   19.92
   4   7   1  454.43   22.67
   4   7   1  437.29   24.54
   4   7   1  428.24   21.13
  -5  -8  -1 1141.15   47.23
  -5  -8  -1 1136.94   51.40
  -5  -8  -1 1119.80   48.60
   5   8   1 1156.86   48.88
   5   8   1 1214.19   53.88
  -6  -9  -1  170.46   11.87
  -6  -9  -1  162.38   14.65
  -6  -9  -1  145.77   12.37
   6   9   1  167.39   13.61
   6   9   1  175.56   12.30
   6   9   1  169.33   15.43
  -7 -10  -1  193.72   17.16
  -7 -10  -1  215.28   14.38
  -7 -10  -1  223.25   16.01
   7  10   1  206.43   15.86
   7  10   1  199.15   14.16
   7  10   1  220.18   18.34
  -8 -11  -1  420.09   22.67
  -8 -11  -1  413.31   27.31
  -8 -11  -1  355.01   23.35
   8  11   1  434.53   29.27
   8  11   1  479.21   27.33
   8  11   1  413.66   26.89
  -9 -12  -1 1363.18   62.20
  -9 -12  -1 1360.34   59.59
  -9 -12  -1 1473.97   85.81
   9  12   1 1400.90   69.38
   9  12   1 1467.09   66.17
   9  12   1 1481.79   62.84
 -10 -13  -1   16.11    7.18
 -10 -13  -1    4.25    3.83
  10  13   1   10.58    6.61
  10  13   1   11.09    6.23
  10  13   1    9.00    4.33
 -11 -14  -1   15.37    5.55
 -11 -14  -1   18.36    7.90
  11  14   1    8.56    6.18
  11  14   1   14.21    5.42
  11  14   1   11.46    6.41
 -12 -15  -1  127.73   13.24
 -12 -15  -1  148.01   18.39
  12  15   1  130.31   15.64
  12  15   1  109.89   16.67
  12  15   1  145.32   14.17
 -13 -16  -1   90.97   17.89
 -13 -16  -1   97.27   11.93
  13  16   1   98.64   16.20
  13  16   1  104.24   14.74
  13  16   1   95.45   12.17
 -14 -17  -1  234.86   19.41
 -14 -17  -1  211.29   24.07
  14  17   1  266.72   21.16
  14  17   1  269.44   24.81
 -15 -18  -1   94.83   18.97
  15  18   1  110.83   13.89
  15  18   1  100.05   16.15
 -16 -19  -1  491.53   39.92
  16  19   1  512.59   37.79
  16  19   1  484.62   32.05
 -17 -20  -1   85.35   23.97
  17  20   1  101.73   19.50
  17  20   1  125.69   15.94
 -18 -21  -1   86.33   20.16
  18  21   1  105.54   20.06
  18  21   1  101.09   14.85
 -19 -22  -1   69.72   18.05
  19  22   1   55.05   16.13
  19  22   1   95.69   14.64
 -20 -23  -1  179.92   26.83
  20  23   1  209.78   26.33
  20  23   1  147.53   18.79
 -21 -24  -1  134.36   27.81
  21  24   1  108.22   22.60
 -22 -25  -1   75.06   21.16
  22  25   1   90.29   16.83
  22  25   1   85.11   21.21
 -23 -26  -1   16.70   12.91
  23  26   1   24.34   14.14
  23  26   1    7.83    8.68
 -24 -27  -1  223.63   33.85
  24  27   1  295.25   34.74
  24  27   1  242.35   26.15
  25  28   1    9.17   11.31
  25  28   1   17.44   10.36
  27  25   0   -1.49    8.26
  27  25   0    6.44    7.91
 -27 -25   0   -7.43   11.22
  26  24   0  166.72   31.15
  26  24   0  149.55   21.22
 -26 -24   0  146.32   29.65
  25  23   0    8.57    9.35
  25  23   0   27.13   11.16
 -25 -23   0   13.55   11.41
  24  22   0   82.60   16.20
  24  22   0   71.03   19.77
 -24 -22   0   92.61   23.84
  23  21   0    1.97   10.79
  23  21   0   -3.69    6.17
 -23 -21   0   -3.17    6.48
  22  20   0    9.50    8.89
  22  20   0    2.98    6.10
 -22 -20   0  -10.99    5.87
  21  19   0  105.59   15.39
  21  19   0   98.28   20.24
 -21 -19   0   71.69   18.53
  20  18   0 1111.49   66.37
  20  18   0 1185.38   60.17
 -20 -18   0 1222.08   73.00
  19  17   0   67.00   13.04
  19  17   0   56.95   14.71
 -19 -17   0   61.07   16.07
  18  16   0   73.18   13.25
  18  16   0   85.32   17.32
 -18 -16   0   78.66   18.45
  17  15   0   -1.28    5.18
  17  15   0    0.90    4.17
 -17 -15   0   -9.41    2.61
  16  14   0  338.88   28.11
  16  14   0  302.81   23.39
  16  14   0  391.92   32.69
 -16 -14   0  328.10   29.45
 -16 -14   0  322.04   23.29
  15  13   0  551.62   35.45
  15  13   0  453.08   29.38
  15  13   0  523.53   37.90
 -15 -13   0  558.85   37.85
 -15 -13   0  488.45   29.96
  14  12   0   58.97    9.38
  14  12   0   39.32   10.33
  14  12   0   48.84   12.99
 -14 -12   0   58.33    8.92
 -14 -12   0   43.77   11.11
  13  11   0 1945.58   91.22
  13  11   0 2063.93   88.73
  13  11   0 1924.42   83.10
 -13 -11   0 1922.05   82.26
 -13 -11   0 2021.79   90.59
  12  10   0    0.75    3.97
  12  10   0    0.94    3.75
  12  10   0   -1.15    2.70
 -12 -10   0    3.48    4.99
 -12 -10   0    0.69    2.65
 -12 -10   0   -1.98    2.77
  11   9   0   -1.87    2.46
  11   9   0   -1.12    3.84
  11   9   0   -0.83    2.96
 -11  -9   0    1.21    2.87
 -11  -9   0   -4.65    2.21
 -11  -9   0   -3.37    2.96
  10   8   0  282.78   19.95
  10   8   0  270.97   24.49
  10   8   0  249.78   20.57
 -10  -8   0  254.11   19.07
 -10  -8   0  267.15   16.84
 -10  -8   0  270.86   20.84
   9   7   0   94.71   10.68
   9   7   0   92.52    9.09
   9   7   0  104.49   12.26
  -9  -7   0   93.11    9.04
  -9  -7   0   92.15   11.48
  -9  -7   0  112.63   10.91
   8   6   0    0.96    6.94
   8   6   0    2.66    3.22
   8   6   0    0.92    2.37
  -8  -6   0    1.60    2.29
  -8  -6   0   -0.14    3.37
  -8  -6   0    2.39    3.06
   7   5   0  127.27   12.66
   7   5   0  165.45   12.72
   7   5   0  154.66   10.64
  -7  -5   0  150.45   10.26
  -7  -5   0  145.27   11.54
  -7  -5   0  133.02   12.42
   6   4   0   48.82    7.57
   6   4   0   40.94    6.10
   6   4   0   41.87    5.28
  -6  -4   0   41.12    5.17
  -6  -4   0   42.07    6.10
  -6  -4   0   30.55    6.19
   5   3   0  390.91   18.53
   5   3   0  417.39   21.14
   5   3   0  403.69   20.01
  -5  -3   0  390.20   18.36
  -5  -3   0  421.95   21.11
  -5  -3   0  398.73   19.77
   4   2   0  270.66   13.65
   4   2   0  239.08   13.77
   4   2   0  261.12   12.47
  -4  -2   0  223.04   13.22
  -4  -2   0  256.79   13.05
  -4  -2   0  251.07   12.13
   3   1   0  586.50   23.82
   3   1   0  618.46   24.69
   3   1   0  578.75   24.85
  -3  -1   0  588.40   24.66
   2   0   0   -0.13    0.73
   0  -2   0    0.65    0.56
  -1  -3   0  567.48   22.88
  -1  -3   0  576.21   24.01
  -1  -3   0  569.52   24.02
   1   3   0  583.50   23.76
   1   3   0  593.46   24.57
   1   3   0  579.23   23.48
  -2  -4   0  257.78   12.80
  -2  -4   0  268.49   14.31
   2   4   0  251.40   14.02
   2   4   0  258.94   12.82
   2   4   0  266.70   12.91
  -3  -5   0  371.97   18.35
  -3  -5   0  385.09   18.19
  -3  -5   0  404.24   20.38
   3   5   0  416.51   19.24
   3   5   0  393.67   21.02
   3   5   0  411.64   19.50
  -4  -6   0   28.98    6.11
  -4  -6   0   39.67    5.30
  -4  -6   0   44.11    5.81
   4   6   0   47.15    5.74
   4   6   0   44.04    6.11
   4   6   0   58.29    7.66
  -5  -7   0  135.90   10.68
  -5  -7   0  125.52   11.82
  -5  -7   0  157.88   10.64
   5   7   0  159.09   10.88
   5   7   0  151.15   13.09
   5   7   0  131.70   10.89
  -6  -8   0    4.33    3.01
  -6  -8   0    2.27    2.53
  -6  -8   0   -0.56    3.18
   6   8   0    1.52    3.11
   6   8   0    6.80    5.27
   6   8   0    1.33    2.71
  -7  -9   0   84.56   11.11
  -7  -9   0   92.68    9.69
  -7  -9   0   93.78    9.03
   7   9   0  101.01   10.78
   7   9   0  115.18   10.36
   7   9   0  120.80   13.15
  -8 -10   0  273.80   21.05
  -8 -10   0  284.69   17.78
  -8 -10   0  273.24   18.64
   8  10   0  265.36   21.36
   8  10   0  292.42   19.82
   8  10   0  288.77   18.76
  -9 -11   0    2.97    3.14
  -9 -11   0    0.74    3.21
  -9 -11   0    2.62    4.28
   9  11   0    1.13    3.34
   9  11   0    0.85    3.13
   9  11   0   -2.41    3.39
 -10 -12   0    2.52    4.43
 -10 -12   0    0.33    2.67
 -10 -12   0   -1.74    2.42
  10  12   0    1.44    4.51
  10  12   0   -0.13    3.37
  10  12   0    1.27    2.94
 -11 -13   0 1980.53   83.86
 -11 -13   0 2008.46   91.45
  11  13   0 2039.83   88.75
  11  13   0 2016.05   93.13
  11  13   0 1996.19   85.17
 -12 -14   0   64.37   13.71
 -12 -14   0   55.91    9.11
  12  14   0   40.88    9.03
  12  14   0   47.10   12.65
  12  14   0   47.91   10.77
 -13 -15   0  392.64   26.41
 -13 -15   0  477.29   34.47
  13  15   0  432.02   34.72
  13  15   0  478.48   29.46
  13  15   0  502.55   33.10
 -14 -16   0  317.02   29.24
 -14 -16   0  333.58   23.85
  14  16   0  345.35   27.78
  14  16   0  300.92   29.20
  14  16   0  379.63   25.59
 -15 -17   0   -1.51    5.12
  15  17   0    7.70    7.42
  15  17   0   -1.02    3.64
 -16 -18   0   51.95   14.27
  16  18   0   61.32   12.39
  16  18   0   93.48   18.26
 -17 -19   0   78.14   18.04
  17  19   0  125.54   15.81
  17  19   0   72.94   16.76
 -18 -20   0 1273.78   74.61
  18  20   0 1201.00   61.90
  18  20   0 1206.01   68.35
 -19 -21   0  142.23   23.24
  19  21   0  108.42   16.07
  19  21   0  131.22   20.52
 -20 -22   0   -5.83    6.25
  20  22   0    1.83    5.81
  20  22   0   -7.06    4.44
 -21 -23   0    1.65    7.09
  21  23   0    2.54    6.45
  21  23   0   -2.60    6.53
 -22 -24   0   90.27   22.50
  22  24   0   59.38   18.09
  22  24   0   50.61   13.16
 -23 -25   0   46.59   22.95
  23  25   0   10.66    8.69
  23  25   0   20.11   16.88
 -24 -26   0  144.66   29.50
  24  26   0  185.02   27.89
  24  26   0  166.71   22.37
  25  27   0   21.80   11.12
  25  27   0    8.37   11.07
  27  26   1   45.40   14.10
  27  26   1   41.48   17.26
  26  25   1   88.93   18.55
  26  25   1   77.79   21.04
 -26 -25  -1   72.80   22.33
  25  24   1   53.50   14.20
  25  24   1   55.70   18.15
 -25 -24  -1   41.51   17.53
  24  23   1   88.23   16.97
 -24 -23  -1   91.95   22.55
  23  22   1   50.64   12.68
  23  22   1   93.24   22.89
 -23 -22  -1   72.49   21.14
  22  21   1   99.85   15.76
  22  21   1   93.08   20.17
 -22 -21  -1   69.28   18.99
  21  20   1  115.07   22.22
  21  20   1  104.49   15.30
 -21 -20  -1  123.92   24.71
  20  19   1  111.11   15.14
  20  19   1   93.99   19.93
 -20 -19  -1   59.75   17.18
  19  18   1  213.79   20.42
  19  18   1  215.95   25.26
  18  17   1  321.98   24.63
  18  17   1  306.27   29.13
 -18 -17  -1  296.86   30.29
  17  16   1   42.40   12.28
  17  16   1   67.60   12.67
 -17 -16  -1   45.21   13.09
 -17 -16  -1   46.67   15.05
  16  15   1   17.58    8.91
  16  15   1   19.36    7.11
 -16 -15  -1   14.60    9.11
 -16 -15  -1   24.86    7.45
  15  14   1  325.83   26.55
  15  14   1  270.56   27.47
  15  14   1  315.28   22.22
 -15 -14  -1  266.59   20.27
 -15 -14  -1  329.74   28.18
  14  13   1    9.58    4.71
  14  13   1   22.11    8.48
  14  13   1   13.69    8.21
 -14 -13  -1   12.12    7.41
  13  12   1   27.00    8.74
  13  12   1   41.76   11.74
  13  12   1   24.63    6.58
 -13 -12  -1   32.93   10.18
 -13 -12  -1   34.82    7.75
  12  11   1 1245.97   62.92
  12  11   1 1239.84   59.62
  12  11   1 1177.30   54.14
 -12 -11  -1 1206.65   60.31
 -12 -11  -1 1128.82   51.71
  11  10   1   16.90    7.63
  11  10   1   26.27    7.64
  11  10   1   37.70    6.93
 -11 -10  -1   36.61    8.56
 -11 -10  -1   25.78    9.85
 -11 -10  -1   22.11    5.62
  10   9   1  283.17   20.53
  10   9   1  273.04   17.27
  10   9   1  276.43   22.17
 -10  -9  -1  268.71   17.08
 -10  -9  -1  262.83   21.46
 -10  -9  -1  312.88   20.47
   9   8   1  104.07   12.72
   9   8   1   95.37   11.00
   9   8   1  101.64    9.22
  -9  -8  -1   85.02    8.32
  -9  -8  -1   92.47   10.24
  -9  -8  -1   90.23   11.88
   8   7   1  190.63   12.34
   8   7   1  179.51   15.86
   8   7   1  179.23   14.36
  -8  -7  -1  181.96   11.91
  -8  -7  -1  173.29   15.40
  -8  -7  -1  183.22   14.12
   7   6   1  616.35   31.09
   7   6   1  595.32   32.44
   7   6   1  654.55   28.31
  -7  -6  -1  613.45   30.95
  -7  -6  -1  653.63   28.70
  -7  -6  -1  661.15   33.62
   6   5   1  281.23   16.57
   6   5   1  257.24   17.64
   6   5   1  258.16   13.83
  -6  -5  -1  274.36   14.15
  -6  -5  -1  273.80   16.23
  -6  -5  -1  257.59   17.42
   5   4   1  144.92    8.92
   5   4   1  180.10   11.54
  -5  -4  -1  180.12   12.85
  -5  -4  -1  164.71    9.47
  -5  -4  -1  172.07   11.37
   4   3   1   74.96    5.11
   4   3   1   71.91    6.46
   4   3   1   63.21    7.12
  -4  -3  -1   85.73    7.92
  -4  -3  -1   73.64    5.15
  -4  -3  -1   69.54    6.47
   3   2   1  366.27   16.88
   3   2   1  364.30   17.72
   3   2   1  372.65   15.08
  -3  -2  -1  347.69   17.66
  -3  -2  -1  367.25   17.02
  -3  -2  -1  401.76   15.41
   2   1   1    1.25    1.32
   1   2  -1    0.19    0.90
  -2  -3   1  377.99   17.39
  -2  -3   1  366.10   16.13
   2   3  -1  375.94   17.60
   2   3  -1  370.05   16.32
   2   3  -1  376.49   16.87
  -3  -4   1   74.56    7.27
  -3  -4   1   79.45    6.52
  -3  -4   1   71.61    6.00
   3   4  -1   81.66    7.55
   3   4  -1   69.96    6.22
   3   4  -1   69.23    6.04
  -4  -5   1  143.38    9.93
  -4  -5   1  166.33   11.94
  -4  -5   1  142.90    9.89
   4   5  -1  156.37   11.91
   4   5  -1  149.07   10.26
   4   5  -1  156.10   10.32
  -5  -6   1  301.58   16.70
  -5  -6   1  290.29   16.35
   5   6  -1  267.58   15.99
   5   6  -1  290.87   18.19
   5   6  -1  278.39   15.88
  -6  -7   1  642.83   33.36
  -6  -7   1  674.71   31.36
  -6  -7   1  653.65   30.70
   6   7  -1  684.88   32.39
   6   7  -1  729.93   35.84
   6   7  -1  693.06   33.06
  -7  -8   1  192.30   13.64
  -7  -8   1  188.79   13.91
   7   8  -1  225.30   15.50
   7   8  -1  201.81   14.34
   7   8  -1  200.82   16.68
  -8  -9   1  111.27   10.37
  -8  -9   1   89.93   11.50
  -8  -9   1  105.87   10.75
   8   9  -1   96.77   10.49
   8   9  -1  102.59   10.20
   8   9  -1   75.99   11.31
  -9 -10   1  265.01   17.77
  -9 -10   1  284.48   21.53
  -9 -10   1  245.19   21.10
   9  10  -1  280.87   19.60
   9  10  -1  272.59   18.35
   9  10  -1  246.84   20.80
 -10 -11   1   32.44    7.92
 -10 -11   1   35.68   11.12
 -10 -11   1   33.15    7.38
  10  11  -1   13.56    6.89
  10  11  -1   37.47    8.53
  10  11  -1   37.50    8.49
 -11 -12   1 1290.96   62.01
 -11 -12   1 1185.08   54.96
 -11 -12   1 1137.43   56.10
  11  12  -1 1230.16   57.27
  11  12  -1 1232.16   63.38
  11  12  -1 1297.27   60.37
 -12 -13   1   25.57    8.62
 -12 -13   1   51.12    9.54
  12  13  -1   28.93    7.98
  12  13  -1   37.27   10.53
  12  13  -1   35.31   10.45
 -13 -14   1    9.62    5.63
 -13 -14   1    8.47    7.18
  13  14  -1   13.10    6.10
  13  14  -1    6.92    5.89
  13  14  -1    2.74    5.05
 -14 -15   1  288.09   21.66
 -14 -15   1  256.21   25.48
  14  15  -1  267.43   24.19
  14  15  -1  301.72   28.45
  14  15  -1  337.65   23.98
 -15 -16   1   23.68   10.15
  15  16  -1   22.87    7.88
  15  16  -1   28.24    9.81
 -16 -17   1   53.09   14.78
  16  17  -1   73.21   13.71
  16  17  -1   76.29   15.52
 -17 -18   1  268.96   28.25
  17  18  -1  305.19   25.07
  17  18  -1  274.18   26.77
  18  19  -1  183.04   23.05
  18  19  -1  208.63   21.12
 -19 -20   1   50.47   15.40
  19  20  -1   70.80   17.03
  19  20  -1  101.52   15.53
 -20 -21   1   88.01   20.40
  20  21  -1  143.14   21.36
  20  21  -1   76.37   15.81
 -21 -22   1   74.03   20.43
  21  22  -1  111.56   22.53
  21  22  -1  116.28   17.74
 -22 -23   1   30.31   14.25
  22  23  -1   64.75   16.15
  22  23  -1   81.72   20.41
 -23 -24   1   85.92   22.71
  23  24  -1   51.00   16.93
  23  24  -1   76.50   16.81
 -24 -25   1   51.05   18.64
  24  25  -1   62.82   16.67
  24  25  -1   74.16   19.19
 -25 -26   1   72.28   20.89
  25  26  -1  125.72   22.81
  25  26  -1  158.87   29.47
  26  27  -1   55.70   15.85
  26  27  -1   45.02   17.21
  26  26   2    1.24    6.57
  26  26   2   -1.40   10.52
  25  25   2  238.34   32.17
  25  25   2  240.30   24.11
 -25 -25  -2  206.53   31.78
  24  24   2   -2.59    8.18
  24  24   2    3.40    8.65
 -24 -24  -2    1.12   10.43
  23  23   2   94.39   16.93
  23  23   2   79.17   21.65
 -23 -23  -2   63.02   19.56
  22  22   2   -2.86    4.72
  22  22   2    1.09    8.76
 -22 -22  -2   -6.19    5.02
  21  21   2   28.62   13.12
  21  21   2   21.36    8.30
 -21 -21  -2   45.26   16.61
  20  20   2    2.88    4.89
  20  20   2   -3.66    5.74
 -20 -20  -2   -0.33    7.11
  19  19   2  253.05   21.93
  19  19   2  263.71   28.01
 -19 -19  -2  210.21   27.11
  18  18   2   -2.53    4.85
  18  18   2   -3.35    3.48
 -18 -18  -2   -8.62    4.15
  17  17   2  611.59   35.46
  17  17   2  588.12   41.70
 -17 -17  -2  588.56   43.27
 -17 -17  -2  530.84   32.59
  16  16   2   -1.66    5.19
  16  16   2   -2.10    2.94
 -16 -16  -2   -0.31    3.42
 -16 -16  -2    0.60    5.41
  15  15   2  710.68   43.20
  15  15   2  554.98   42.90
  15  15   2  695.65   36.39
 -15 -15  -2  701.11   36.41
 -15 -15  -2  612.13   43.40
  14  14   2    0.09    5.22
  14  14   2   -3.80    2.30
  14  14   2   -3.64    3.91
 -14 -14  -2   -2.33    2.34
 -14 -14  -2   -0.31    4.55
  13  13   2  911.73   50.59
  13  13   2  975.90   45.46
  13  13   2  961.76   61.70
 -13 -13  -2  902.85   51.43
 -13 -13  -2  868.31   42.09
  12  12   2    0.20    3.95
  12  12   2   -2.94    4.02
  12  12   2    2.42    3.04
 -12 -12  -2   -1.02    4.21
 -12 -12  -2    2.28    2.93
  11  11   2 1557.31   65.69
  11  11   2 1576.11   71.54
  11  11   2 1552.31   74.98
 -11 -11  -2 1421.49   60.24
 -11 -11  -2 1417.91   68.99
  10  10   2   -1.67    2.18
  10  10   2   -5.09    2.52
  10  10   2    1.16    4.11
 -10 -10  -2    2.47    2.53
 -10 -10  -2   -3.91    2.11
 -10 -10  -2   -2.42    3.44
   9   9   2   61.64    7.15
   9   9   2   48.71    9.21
   9   9   2   61.21   11.96
  -9  -9  -2   56.36    8.44
  -9  -9  -2   68.17   10.42
  -9  -9  -2   58.89    6.80
   8   8   2   -0.19    3.48
   8   8   2   -3.30    2.14
   8   8   2   -0.40    1.98
  -8  -8  -2    2.51    2.31
  -8  -8  -2    1.87    2.96
  -8  -8  -2   -3.98    2.54
   7   7   2  635.14   28.71
   7   7   2  675.65   35.18
   7   7   2  655.64   32.72
  -7  -7  -2  625.88   33.05
  -7  -7  -2  590.66   26.98
  -7  -7  -2  621.25   30.64
   6   6   2    1.60    1.88
   6   6   2    2.19    3.62
  -6  -6  -2    6.37    4.83
  -6  -6  -2   -1.00    1.71
  -6  -6  -2    0.28    2.74
   5   5   2  562.77   28.63
   5   5   2  545.72   26.81
   5   5   2  562.00   23.55
  -5  -5  -2  572.97   28.61
  -5  -5  -2  543.29   26.43
   4   4   2   -3.73    2.40
   4   4   2   -0.53    2.14
   4   4   2   -0.99    1.34
  -4  -4  -2   -1.75    2.57
  -4  -4  -2    0.62    1.35
  -4  -4  -2   -0.91    2.13
   3   3   2  561.09   25.29
   3   3   2  519.02   23.79
   3   3   2  541.98   20.92
  -3  -3  -2  510.57   23.13
  -3  -3  -2  531.48   20.36
  -3  -3  -2  525.38   24.46
   2   2   2    1.04    1.49
   2   2   2    1.80    2.09
  -2  -2  -2    3.60    2.31
  -2  -2  -2    0.52    1.48
   1   1   2 5860.69  248.45
   0   0   2   -0.13    0.55
   0   0  -2   -0.18    0.61
  -1  -1   2    2.44    1.29
   1   1  -2    1.69    0.91
  -2  -2   2   -0.54    1.23
  -2  -2   2   -1.03    1.17
  -2  -2   2    1.53    1.73
   2   2  -2    2.04    1.64
   2   2  -2    1.32    1.27
   2   2  -2    1.74    1.90
  -3  -3   2  523.19   22.79
  -3  -3   2  535.23   23.57
   3   3  -2  548.07   24.40
   3   3  -2  549.52   24.05
   3   3  -2  523.85   23.19
  -4  -4   2    2.87    2.38
  -4  -4   2   -0.11    1.99
  -4  -4   2   -0.55    2.18
   4   4  -2   -1.50    1.99
   4   4  -2   -2.49    2.74
   4   4  -2   -2.42    1.62
  -5  -5   2  547.08   27.19
  -5  -5   2  522.31   25.36
  -5  -5   2  545.93   25.45
   5   5  -2  565.08   26.77
   5   5  -2  570.03   28.13
   5   5  -2  560.76   26.51
  -6  -6   2   -2.09    2.65
  -6  -6   2   -3.78    1.98
  -6  -6   2   -0.18    2.15
   6   6  -2    1.77    3.50
   6   6  -2   -1.29    2.35
   6   6  -2   -3.14    2.33
  -7  -7   2  666.74   31.80
  -7  -7   2  661.87   31.99
  -7  -7   2  662.97   34.32
   7   7  -2  588.98   30.43
   7   7  -2  644.85   30.79
  -8  -8   2   -1.19    2.00
  -8  -8   2   -3.61    2.12
  -8  -8   2    1.92    3.58
   8   8  -2   -2.38    2.51
   8   8  -2    4.53    3.56
   8   8  -2   -1.05    3.16
  -9  -9   2   72.06    8.93
  -9  -9   2   71.69    8.97
  -9  -9   2   69.85   10.60
   9   9  -2   50.77    8.11
   9   9  -2   62.37    9.95
   9   9  -2   53.68    8.63
 -10 -10   2    1.06    3.96
 -10 -10   2   -3.04    2.33
 -10 -10   2   -2.55    1.86
  10  10  -2    4.98    4.00
  10  10  -2   -1.12    3.03
  10  10  -2    3.46    4.48
 -11 -11   2 1417.93   65.56
 -11 -11   2 1433.29   69.52
 -11 -11   2 1529.07   70.26
  11  11  -2 1479.56   68.25
  11  11  -2 1549.46   67.26
  11  11  -2 1471.76   71.58
 -12 -12   2   10.65    6.54
 -12 -12   2    2.72    3.97
  12  12  -2    2.30    4.51
  12  12  -2   -0.21    4.26
  12  12  -2    0.56    3.38
 -13 -13   2  960.53   52.01
 -13 -13   2  828.66   44.50
  13  13  -2  981.91   48.94
  13  13  -2  957.83   54.66
  13  13  -2  953.65   50.95
 -14 -14   2    3.48    5.78
 -14 -14   2    0.78    3.80
  14  14  -2   -2.47    3.65
  14  14  -2   -2.29    3.43
  14  14  -2   -3.30    3.03
 -15 -15   2  688.71   45.11
  15  15  -2  766.96   42.67
  15  15  -2  708.74   44.31
  15  15  -2  759.49   49.08
 -16 -16   2   10.77    7.44
  16  16  -2    1.98    4.91
  16  16  -2    5.16    6.10
 -17 -17   2  546.38   41.18
  17  17  -2  579.56   36.92
  17  17  -2  517.71   38.36
 -18 -18   2   -4.76    4.83
  18  18  -2   -1.58    5.81
  18  18  -2    8.18    6.78
 -19 -19   2  221.88   27.24
  19  19  -2  287.58   26.02
  19  19  -2  272.70   28.23
 -20 -20   2    1.68    7.44
  20  20  -2    0.32    7.67
  20  20  -2    7.86    6.84
 -21 -21   2   45.41   15.60
  21  21  -2   30.43   12.37
  21  21  -2   44.67   13.33
 -22 -22   2    4.35    8.71
  22  22  -2   -1.77    7.05
  22  22  -2   -3.80    5.35
 -23 -23   2   54.48   19.39
  23  23  -2   51.27   14.07
  23  23  -2   41.27   15.35
 -24 -24   2   -4.07    7.47
  24  24  -2    4.21    7.87
 -25 -25   2  195.36   30.79
  25  25  -2  195.66   28.80
  25  25  -2  212.15   26.09
 -26 -26   2    1.92   12.16
  26  26  -2    1.08    8.08
  26  26  -2    9.37   10.93
  26  27   3   59.51   21.10
  26  27   3   31.51   10.76
  25  26   3   53.91   19.91
 -25 -26  -3   22.47   16.09
  24  25   3   45.21   17.63
  24  25   3   26.30   10.13
 -24 -25  -3   19.66   12.21
  23  24   3  128.32   17.12
  23  24   3   87.97   34.74
 -23 -24  -3  136.31   27.71
  22  23   3   71.23   19.52
  22  23   3   63.33   13.18
 -22 -23  -3   70.14   19.60
  21  22   3  410.62   37.49
  21  22   3  312.92   25.96
 -21 -22  -3  279.70   33.70
  20  21   3   90.05   13.37
  20  21   3   75.80   18.76
 -20 -21  -3  128.72   25.77
  19  20   3  149.08   16.57
  19  20   3  132.17   21.06
 -19 -20  -3   86.52   19.63
  18  19   3  344.10   32.38
  18  19   3  378.89   26.24
 -18 -19  -3  311.83   33.55
  17  18   3    1.53    6.17
  17  18   3   19.39    7.03
 -17 -18  -3   23.89    7.74
 -17 -18  -3    1.59    5.98
  16  17   3   30.45   10.79
  16  17   3   20.85    6.71
 -16 -17  -3   15.01    5.55
 -16 -17  -3   25.99   11.46
  15  16   3   37.55    8.40
 -15 -16  -3   31.98    7.76
 -15 -16  -3   68.89   16.09
  14  15   3   -3.11    2.25
  14  15   3    9.98    7.61
  14  15   3    1.24    4.93
 -14 -15  -3    5.29    4.24
 -14 -15  -3    5.07    6.19
  13  14   3    7.43    4.07
  13  14   3   -1.10    3.78
  13  14   3   -4.77    2.92
 -13 -14  -3    7.60    6.93
 -13 -14  -3    4.20    3.82
  12  13   3   77.31   15.61
  12  13   3  120.08   14.66
  12  13   3  101.05   10.34
 -12 -13  -3   91.93    9.83
 -12 -13  -3  116.49   16.13
  11  12   3   27.55    9.53
  11  12   3   18.77    7.14
 -11 -12  -3    7.32    6.16
 -11 -12  -3   18.25    4.89
  10  11   3 2685.95  105.36
  10  11   3 2667.22  112.10
  10  11   3 2747.96  116.56
 -10 -11  -3 2787.15  113.35
 -10 -11  -3 2399.77  104.71
 -10 -11  -3 2497.77   99.55
   9  10   3  964.50   50.01
   9  10   3  906.18   40.80
   9  10   3  977.03   47.07
  -9 -10  -3  897.57   44.11
  -9 -10  -3  907.08   39.52
  -9 -10  -3  894.61   47.38
   8   9   3  181.09   11.67
   8   9   3  185.04   17.10
   8   9   3  168.85   14.81
  -8  -9  -3  159.95   15.73
  -8  -9  -3  151.15   10.56
   7   8   3  227.01   18.83
   7   8   3  251.82   13.63
   7   8   3  246.47   17.56
  -7  -8  -3  256.25   17.54
  -7  -8  -3  268.06   14.30
  -7  -8  -3  263.92   19.61
   6   7   3   64.65    9.98
   6   7   3   81.10    6.42
   6   7   3   78.43    9.20
  -6  -7  -3   58.21    5.50
  -6  -7  -3   55.14    9.42
  -6  -7  -3   78.04    8.41
   5   6   3  159.94   11.96
   5   6   3  142.51    8.46
   5   6   3  158.85   13.56
  -5  -6  -3  116.38   10.19
  -5  -6  -3  123.04   11.86
  -5  -6  -3  140.79    9.01
   4   5   3  212.99   13.62
   4   5   3  192.14   14.27
   4   5   3  214.65   10.00
  -4  -5  -3  194.00    9.44
  -4  -5  -3  199.97   12.69
  -4  -5  -3  185.12   13.69
   3   4   3    2.31    2.51
   3   4   3    2.68    2.99
   3   4   3    0.68    1.04
  -3  -4  -3   -1.90    0.89
  -3  -4  -3   -2.06    2.18
  -3  -4  -3   -0.08    2.37
   2   3   3  518.81   24.29
   2   3   3  535.82   23.72
   2   3   3  534.26   20.30
  -2  -3  -3  527.39   22.97
  -2  -3  -3  499.00   23.61
   1   2   3  367.69   14.87
   1   2   3  382.61   17.43
   1   2   3  380.34   17.00
  -1  -2  -3  362.22   17.44
  -1  -2  -3  396.60   17.28
  -1  -2  -3  387.90   15.21
   0   1   3  577.92   22.50
   0   1   3  570.16   23.19
   0   1   3  543.27   24.86
   0  -1  -3  542.95   23.11
   0  -1  -3  610.23   23.83
   0  -1  -3  590.56   24.16
  -1   0   3  569.75   23.28
  -1   0   3  575.75   23.57
   1   0  -3  604.75   23.53
   1   0  -3  587.43   24.27
   1   0  -3  580.96   23.90
  -2  -1   3  393.48   16.95
  -2  -1   3  378.47   16.66
  -2  -1   3  379.44   17.58
   2   1  -3  367.26   16.22
   2   1  -3  372.53   16.70
   2   1  -3  374.64   17.22
  -3  -2   3  503.79   23.61
  -3  -2   3  555.02   23.14
   3   2  -3  520.83   23.86
   3   2  -3  536.11   23.09
   3   2  -3  535.35   23.28
  -4  -3   3   -0.57    2.60
  -4  -3   3    5.01    2.69
  -4  -3   3    0.70    2.12
   4   3  -3    1.98    2.43
   4   3  -3    2.98    2.82
   4   3  -3   -2.28    2.01
  -5  -4   3  189.77   12.17
  -5  -4   3  178.66   12.67
  -5  -4   3  213.52   13.16
   5   4  -3  206.27   12.39
   5   4  -3  186.05   12.85
   5   4  -3  163.99   11.99
  -6  -5   3  133.48   10.68
  -6  -5   3  138.95   11.06
  -6  -5   3  153.71   12.00
   6   5  -3  148.16   11.26
   6   5  -3  161.92   12.70
   6   5  -3  137.56   11.37
  -7  -6   3   76.31    8.46
  -7  -6   3   79.23    8.67
  -7  -6   3   72.68    9.28
   7   6  -3   72.01    8.83
   7   6  -3   77.75    9.51
  -8  -7   3  237.90   18.12
  -8  -7   3  259.05   16.98
  -8  -7   3  247.87   16.77
   8   7  -3  255.00   17.30
   8   7  -3  226.78   18.02
   8   7  -3  256.18   17.26
  -9  -8   3  178.84   16.12
  -9  -8   3  181.96   14.58
  -9  -8   3  189.07   14.73
   9   8  -3  159.25   14.00
   9   8  -3  154.15   13.68
   9   8  -3  159.44   15.27
 -10  -9   3  887.81   44.07
 -10  -9   3  969.03   48.31
 -10  -9   3  954.71   45.16
  10   9  -3  917.82   48.72
  10   9  -3  999.49   46.62
  10   9  -3  966.53   46.88
 -11 -10   3 2624.93  110.63
 -11 -10   3 2479.97  105.15
 -11 -10   3 2571.70  110.88
  11  10  -3 2753.75  108.54
  11  10  -3 2623.66  106.75
  11  10  -3 2383.40  109.63
 -12 -11   3   23.82    7.18
 -12 -11   3   21.23    7.95
 -12 -11   3   21.63    8.15
  12  11  -3   17.55    7.03
  12  11  -3   18.81    8.22
  12  11  -3   16.84    6.39
 -13 -12   3  100.84   14.88
 -13 -12   3  105.27   12.74
  13  12  -3   81.67   12.36
  13  12  -3   91.00   14.37
  13  12  -3   76.13   11.48
 -14 -13   3   16.38    7.87
  14  13  -3    6.18    6.37
  14  13  -3   10.14    7.12
  14  13  -3   13.00    6.54
 -15 -14   3    0.72    4.92
  15  14  -3    3.19    5.16
  15  14  -3    9.98    7.20
  15  14  -3    2.71    5.22
 -16 -15   3   51.09   13.89
  16  15  -3   56.81   12.32
  16  15  -3   48.01   12.24
 -17 -16   3    9.15    8.02
  17  16  -3   28.01   10.18
  17  16  -3   13.88    8.10
 -18 -17   3  -10.10    3.17
  18  17  -3    5.91    7.66
  18  17  -3    1.63    5.26
 -19 -18   3  428.79   51.48
  19  18  -3  392.59   31.08
  19  18  -3  366.65   32.46
 -20 -19   3   81.81   18.88
  20  19  -3  125.23   19.78
  20  19  -3  179.04   37.67
 -21 -20   3   93.54   20.90
  21  20  -3   97.88   20.15
  21  20  -3  114.09   18.05
 -22 -21   3  372.07   37.81
  22  21  -3  361.68   35.06
  22  21  -3  338.00   30.72
 -23 -22   3   50.47   17.34
  23  22  -3   36.02   14.19
  23  22  -3   68.68   15.84
 -24 -23   3   91.69   23.56
  24  23  -3  105.98   23.90
  24  23  -3  141.17   21.50
 -25 -24   3   31.84   15.43
  25  24  -3   24.22   11.95
  25  24  -3   67.99   20.39
 -26 -25   3    5.36   11.52
  26  25  -3   35.28   14.08
  26  25  -3   27.33   15.33
  27  26  -3   27.36   15.60
  27  26  -3   44.14   15.27
  25  27   4   89.39   22.42
  25  27   4   61.86   12.86
  24  26   4  102.35   24.06
  24  26   4   98.53   16.49
 -24 -26  -4   64.78   21.33
  23  25   4   67.25   13.41
  23  25   4  141.54   28.05
  22  24   4   96.87   14.56
  22  24   4   71.06   20.26
 -22 -24  -4   86.90   22.39
  21  23   4   61.26   18.60
  21  23   4   42.05   10.85
 -21 -23  -4   49.72   18.03
  20  22   4  108.16   22.36
  20  22   4  144.57   16.12
 -20 -22  -4  127.13   25.54
  19  21   4   63.06   16.85
  19  21   4  112.88   13.99
 -19 -21  -4   91.58   21.24
  18  20   4   73.28   17.32
  18  20   4   90.76   12.51
 -18 -20  -4   54.43   16.10
 -18 -20  -4   62.49   11.79
  17  19   4   17.24    9.38
  17  19   4   34.90    8.73
 -17 -19  -4   28.61   12.60
 -17 -19  -4   31.67    8.80
  16  18   4  311.62   22.12
  16  18   4  326.77   29.47
 -16 -18  -4  286.14   20.90
 -16 -18  -4  283.69   29.55
  15  17   4    0.45    5.37
  15  17   4    7.49    4.83
 -15 -17  -4   14.25    8.52
  14  16   4  282.87   19.21
  14  16   4  226.89   23.59
 -14 -16  -4  260.78   26.58
 -14 -16  -4  277.77   19.14
  13  15   4  154.58   20.33
  13  15   4  141.68   17.36
  13  15   4  159.84   13.44
 -13 -15  -4  107.21   11.11
 -13 -15  -4  155.20   19.60
  12  14   4  158.84   13.21
  12  14   4  196.14   19.48
  12  14   4  188.94   24.33
 -12 -14  -4  154.07   18.88
 -12 -14  -4  152.14   12.60
  11  13   4   82.78   13.95
  11  13   4  102.63   10.21
  11  13   4  125.87   15.06
 -11 -13  -4  142.53   17.11
 -11 -13  -4  104.13   10.02
  10  12   4  790.40   36.64
  10  12   4  826.81   43.93
  10  12   4  809.27   46.76
 -10 -12  -4  760.64   43.94
 -10 -12  -4  736.33   34.35
   9  11   4 1365.86   63.13
   9  11   4 1319.77   65.80
   9  11   4 1373.14   55.98
  -9 -11  -4 1323.56   62.84
  -9 -11  -4 1262.81   58.40
  -9 -11  -4 1230.24   52.32
   8  10   4  457.98   31.00
   8  10   4  519.34   30.13
   8  10   4  531.00   24.36
  -8 -10  -4  526.72   32.70
  -8 -10  -4  554.62   30.26
  -8 -10  -4  530.76   25.11
   7   9   4  320.40   21.53
   7   9   4  331.96   16.80
   7   9   4  340.39   23.86
  -7  -9  -4  320.74   16.64
  -7  -9  -4  359.64   23.97
  -7  -9  -4  323.29   20.90
   6   8   4  240.73   12.41
   6   8   4  222.15   16.44
   6   8   4  218.00   17.88
  -6  -8  -4  227.05   17.93
  -6  -8  -4  254.92   16.67
  -6  -8  -4  219.73   12.20
   5   7   4    1.18    1.78
   5   7   4    1.36    3.24
   5   7   4   -2.60    3.49
  -5  -7  -4    1.59    4.11
  -5  -7  -4   10.68    4.16
   4   6   4   -0.91    1.29
   4   6   4    1.38    3.02
   4   6   4   -0.73    3.28
  -4  -6  -4    2.73    2.88
  -4  -6  -4   -0.25    3.33
  -4  -6  -4    0.92    1.48
   3   5   4  207.89    9.57
   3   5   4  215.53    9.64
   3   5   4  181.48   13.78
   3   5   4  186.64   12.96
  -3  -5  -4  200.79   12.92
   2   4   4    0.79    1.15
   2   4   4    0.76    2.61
   2   4   4   -0.23    2.64
  -2  -4  -4    0.60    1.22
  -2  -4  -4    1.88    2.72
  -2  -4  -4    1.08    2.53
   1   3   4   67.95    6.34
   1   3   4   77.43    6.86
   1   3   4   67.58    4.57
  -1  -3  -4   63.69    6.44
  -1  -3  -4   78.81    4.83
  -1  -3  -4   70.68    6.36
   0   2   4  267.65   12.56
   0   2   4  249.26   13.24
   0  -2  -4  245.27   12.88
   0  -2  -4  249.80   12.08
   0  -2  -4  249.85   11.76
  -1   1   4   -0.37    1.21
  -1   1   4   -0.96    1.57
  -1   1   4    2.67    2.00
   1  -1  -4    1.28    1.30
   1  -1  -4    2.15    1.88
   1  -1  -4   -0.55    1.56
  -2   0   4  258.39   13.11
  -2   0   4  256.07   12.11
  -2   0   4  269.87   13.58
   2   0  -4  245.68   11.48
   2   0  -4  233.15   12.32
   2   0  -4  252.48   13.05
  -3  -1   4   66.42    6.01
  -3  -1   4   60.44    6.40
   3   1  -4   83.32    6.08
   3   1  -4   64.88    6.17
  -4  -2   4    1.27    2.61
  -4  -2   4   -2.08    2.36
  -4  -2   4    0.58    2.14
  -4  -2   4   -0.73    1.83
   4   2  -4    0.54    2.33
   4   2  -4   -0.70    2.38
  -5  -3   4  209.09   13.01
  -5  -3   4  214.68   13.72
  -5  -3   4  194.36   12.65
   5   3  -4  193.47   12.99
   5   3  -4  178.49   11.95
   5   3  -4  186.68   12.34
  -6  -4   4    2.06    2.86
  -6  -4   4    1.96    2.96
  -6  -4   4    2.07    2.96
   6   4  -4   -1.41    2.31
   6   4  -4   -1.37    2.33
   6   4  -4    2.84    3.45
  -7  -5   4    3.91    3.53
  -7  -5   4   -0.42    2.72
  -7  -5   4    1.44    2.83
   7   5  -4   -1.13    2.87
   7   5  -4   -1.38    2.53
   7   5  -4    5.82    3.43
  -8  -6   4  215.60   16.22
  -8  -6   4  224.69   15.68
  -8  -6   4  221.57   15.84
   8   6  -4  264.89   17.53
   8   6  -4  254.83   17.61
  -9  -7   4  328.78   20.59
  -9  -7   4  305.42   20.35
  -9  -7   4  340.77   22.17
   9   7  -4  318.65   20.99
   9   7  -4  321.83   20.93
   9   7  -4  340.18   22.56
 -10  -8   4  536.17   31.31
 -10  -8   4  512.73   29.30
  10   8  -4  504.60   29.88
  10   8  -4  585.57   31.08
  10   8  -4  529.30   32.13
 -11  -9   4 1359.44   63.38
 -11  -9   4 1353.57   60.56
 -11  -9   4 1283.92   60.24
  11   9  -4 1294.70   62.80
  11   9  -4 1301.14   60.25
  11   9  -4 1338.99   60.84
 -12 -10   4  890.51   45.64
 -12 -10   4  734.12   40.73
 -12 -10   4  782.23   41.13
  12  10  -4  814.64   42.62
  12  10  -4  808.33   45.51
  12  10  -4  802.99   42.89
 -13 -11   4   96.41   12.29
 -13 -11   4   90.42   13.68
  13  11  -4   91.18   14.11
  13  11  -4   86.26   12.25
  13  11  -4  113.96   13.87
 -14 -12   4  149.34   17.62
  14  12  -4  175.63   17.78
  14  12  -4  166.52   19.66
  14  12  -4  227.83   20.20
 -15 -13   4  173.01   19.83
  15  13  -4  160.23   17.85
  15  13  -4  147.51   18.92
  15  13  -4  140.97   16.54
 -16 -14   4  330.87   28.95
  16  14  -4  237.24   25.51
  16  14  -4  276.45   24.62
  16  14  -4  275.35   23.72
 -17 -15   4    3.25    5.92
  17  15  -4    4.98    5.33
 -18 -16   4  315.72   30.39
  18  16  -4  328.62   27.55
  18  16  -4  324.33   28.98
 -19 -17   4   27.44   11.44
  19  17  -4   44.26   13.01
  19  17  -4   30.81   11.45
 -20 -18   4   49.39   15.38
  20  18  -4   76.81   20.58
  20  18  -4   65.13   16.28
 -21 -19   4  102.12   22.16
  21  19  -4  127.42   20.14
  21  19  -4   99.18   19.27
 -22 -20   4  149.57   27.11
  22  20  -4   78.41   18.39
  22  20  -4  108.39   20.11
 -23 -21   4   72.45   19.41
  23  21  -4   54.77   16.34
  23  21  -4   59.95   15.98
 -24 -22   4   90.04   22.34
  24  22  -4   64.26   17.19
  24  22  -4   91.49   21.56
 -25 -23   4  103.26   26.28
  25  23  -4   84.62   21.54
  25  23  -4   67.80   17.63
 -26 -24   4  103.32   24.48
  26  24  -4   53.94   18.73
  26  24  -4   79.36   19.68
 -27 -25   4  113.89   39.53
  27  25  -4   49.17   18.56
  27  25  -4   69.06   18.11
  25  28   5   72.38   22.44
  24  27   5   14.57    8.00
  24  27   5    2.93    9.52
 -24 -27  -5    5.78   11.69
  23  26   5   29.89    8.87
  23  26   5   53.08   18.87
 -23 -26  -5   44.55   19.43
  22  25   5    1.77    8.64
  22  25   5   -2.06    4.29
 -22 -25  -5   -3.44    8.38
  21  24   5   45.73   10.70
  21  24   5   52.84   16.89
 -21 -24  -5   12.09   11.94
  20  23   5  238.54   20.32
  20  23   5  202.92   27.66
 -20 -23  -5  190.20   28.26
  19  22   5   33.54    8.96
  19  22   5   25.36   12.45
 -19 -22  -5   24.88   13.16
 -19 -22  -5   63.88   19.75
  18  21   5   71.80   18.12
  18  21   5   49.37   10.19
 -18 -21  -5   53.46   17.07
 -18 -21  -5   40.93    9.52
  17  20   5  258.23   27.80
  17  20   5  269.98   20.41
 -17 -20  -5  259.74   20.19
 -17 -20  -5  249.68   29.39
  16  19   5  355.46   23.76
  16  19   5  408.61   33.93
 -16 -19  -5  293.01   30.96
 -16 -19  -5  372.97   23.79
  15  18   5   73.51    9.99
  15  18   5   60.49   14.66
 -15 -18  -5   54.28    8.83
 -15 -18  -5   58.37   15.10
  14  17   5  119.99   17.52
  14  17   5  141.72   12.97
 -14 -17  -5  110.12   11.65
 -14 -17  -5  141.60   19.60
  13  16   5  131.68   17.50
  13  16   5  166.23   13.37
  13  16   5  125.48   19.46
 -13 -16  -5  153.72   13.07
 -13 -16  -5  146.83   19.78
  12  15   5   94.96    9.78
  12  15   5  106.39   19.54
  12  15   5   87.16   13.60
 -12 -15  -5   90.76    9.54
 -12 -15  -5  103.10   16.39
  11  14   5  132.66   18.12
  11  14   5  146.52   11.92
  11  14   5  185.25   18.55
 -11 -14  -5  131.25   11.04
 -11 -14  -5  125.26   17.19
  10  13   5  840.26   46.67
  10  13   5  885.68   39.20
  10  13   5  894.73   50.55
 -10 -13  -5  870.88   39.55
 -10 -13  -5  929.62   50.88
   9  12   5  138.30   10.42
   9  12   5  118.34   14.18
   9  12   5  151.21   17.26
  -9 -12  -5  120.63    9.74
  -9 -12  -5  147.03   16.55
   8  11   5  243.31   21.09
   8  11   5  239.79   14.02
   8  11   5  245.43   19.60
  -8 -11  -5  230.63   18.13
  -8 -11  -5  219.15   13.48
  -8 -11  -5  257.66   21.16
   7  10   5   12.23    5.37
   7  10   5   22.68    4.24
   7  10   5   37.12    9.37
  -7 -10  -5   22.93    7.29
  -7 -10  -5   30.29    7.40
  -7 -10  -5   26.57    4.57
   6   9   5  920.54   38.31
   6   9   5  974.46   45.26
   6   9   5  937.79   47.15
  -6  -9  -5  953.00   46.56
  -6  -9  -5  902.15   43.37
  -6  -9  -5  921.05   37.94
   5   8   5   -0.16    1.72
   5   8   5   -0.53    2.68
   5   8   5   -3.17    2.50
  -5  -8  -5    3.80    4.14
  -5  -8  -5   -3.20    2.22
  -5  -8  -5    2.55    1.74
   4   7   5    3.25    4.01
   4   7   5    1.61    1.61
   4   7   5   -0.72    2.81
   4   7   5    5.42    1.99
  -4  -7  -5    1.34    3.56
  -4  -7  -5    3.65    3.10
   3   6   5  150.45   11.67
   3   6   5  141.32    8.03
   3   6   5  152.31    8.11
   3   6   5  139.24   12.04
  -3  -6  -5  121.72   11.24
  -3  -6  -5  127.21   10.35
   2   5   5  549.70   26.81
   2   5   5  550.57   22.84
   2   5   5  572.28   27.46
  -2  -5  -5  550.94   22.88
  -2  -5  -5  557.75   26.52
  -2  -5  -5  559.51   27.33
   1   4   5  157.38    8.53
   1   4   5  142.28   10.58
   1   4   5  155.30   10.73
  -1  -4  -5  186.63   11.93
  -1  -4  -5  173.15    9.21
  -1  -4  -5  156.01   11.11
   0   3   5  403.00   19.61
   0   3   5  386.65   17.96
   0  -3  -5  429.67   18.58
   0  -3  -5  405.37   19.95
   0  -3  -5  400.27   18.68
   0  -3  -5  406.07   19.42
  -1   2   5  607.14   26.84
  -1   2   5  606.77   25.02
  -1   2   5  599.43   26.02
   1  -2  -5  603.85   26.51
   1  -2  -5  601.52   25.40
   1  -2  -5  659.26   27.59
  -2   1   5  616.19   26.93
  -2   1   5  612.99   26.86
  -2   1   5  594.75   24.80
   2  -1  -5  602.87   26.86
   2  -1  -5  608.90   26.78
   2  -1  -5  609.79   24.85
  -3   0   5  385.17   19.64
  -3   0   5  421.17   19.56
  -3   0   5  383.49   17.53
   3   0  -5  386.32   19.22
   3   0  -5  406.30   17.78
   3   0  -5  402.55   20.09
  -4  -1   5  160.62   11.34
  -4  -1   5  150.74   10.69
  -4  -1   5  167.02    9.87
   4   1  -5  156.60   11.28
   4   1  -5  168.22   10.97
   4   1  -5  150.90    9.53
  -5  -2   5  518.79   26.01
  -5  -2   5  533.79   25.53
  -5  -2   5  553.41   25.61
  -5  -2   5  506.03   24.23
   5   2  -5  545.87   27.63
   5   2  -5  579.39   26.00
  -6  -3   5  142.70   11.38
  -6  -3   5  151.34   12.16
  -6  -3   5  144.73   11.24
  -6  -3   5  152.35   11.19
   6   3  -5  138.41   11.85
   6   3  -5  140.33   10.88
  -7  -4   5    6.68    3.60
  -7  -4   5    0.98    3.30
  -7  -4   5   -1.90    2.52
   7   4  -5   -1.93    2.61
   7   4  -5    3.30    4.00
   7   4  -5   -2.12    2.35
  -8  -5   5    1.17    2.81
  -8  -5   5   -3.20    2.38
  -8  -5   5    0.87    2.92
   8   5  -5   -3.25    2.01
   8   5  -5    4.75    3.68
   8   5  -5   -0.80    2.53
  -9  -6   5  917.98   43.54
  -9  -6   5  908.12   42.88
  -9  -6   5  904.28   43.72
   9   6  -5  956.53   44.86
   9   6  -5  880.54   44.36
   9   6  -5  933.56   43.84
 -10  -7   5   26.43    7.37
 -10  -7   5   23.42    6.88
 -10  -7   5   25.22    6.62
  10   7  -5   18.90    6.79
  10   7  -5   30.82    7.90
  10   7  -5   14.02    5.85
 -11  -8   5  186.23   17.38
 -11  -8   5  236.96   18.07
 -11  -8   5  216.08   17.09
  11   8  -5  243.68   20.07
  11   8  -5  226.90   18.73
  11   8  -5  245.12   18.95
 -12  -9   5  139.16   14.38
 -12  -9   5  135.44   15.00
 -12  -9   5  121.38   13.49
  12   9  -5  144.91   14.89
  12   9  -5  127.48   14.26
  12   9  -5  135.82   15.39
 -13 -10   5  702.52   40.97
 -13 -10   5  911.30   46.35
  13  10  -5  810.42   44.47
  13  10  -5  875.28   45.22
  13  10  -5  803.71   46.50
 -14 -11   5  148.20   17.22
  14  11  -5  153.74   16.52
  14  11  -5  151.20   16.39
  14  11  -5  117.35   16.29
 -15 -12   5  120.10   16.39
  15  12  -5   91.95   13.70
  15  12  -5   78.50   15.36
  15  12  -5  102.93   14.34
 -16 -13   5  165.90   19.68
  16  13  -5  103.22   15.60
  16  13  -5  163.44   20.52
  16  13  -5  158.84   17.83
 -17 -14   5  131.68   18.51
  17  14  -5  121.63   16.70
  17  14  -5  148.33   18.26
 -18 -15   5   55.19   15.18
  18  15  -5   48.12   13.50
  18  15  -5   84.82   16.76
 -19 -16   5  365.26   32.96
  19  16  -5  340.31   29.62
  19  16  -5  379.85   32.06
 -20 -17   5  299.23   36.56
  20  17  -5  203.92   24.67
  20  17  -5  287.23   26.85
 -21 -18   5   66.69   17.20
  21  18  -5   77.72   17.54
  21  18  -5   88.26   19.68
 -22 -19   5   52.26   15.47
  22  19  -5   56.86   15.79
  22  19  -5   45.27   14.08
 -23 -20   5  174.28   26.46
  23  20  -5  205.22   24.64
  23  20  -5  198.43   26.16
 -24 -21   5   27.38   14.65
  24  21  -5   49.05   14.71
  24  21  -5   30.27   13.38
 -25 -22   5   -9.19    6.74
  25  22  -5    3.97    8.29
  25  22  -5   13.03   11.08
 -26 -23   5   29.77   16.18
  26  23  -5   18.17   12.25
  26  23  -5   42.10   15.34
 -27 -24   5   22.61   15.29
  27  24  -5   15.96   12.13
  27  24  -5   12.77   11.58
  28  25  -5   42.71   16.03
  28  25  -5   74.34   22.00
  24  28   6    6.58   11.48
  23  27   6   28.26   14.53
  23  27   6   26.53    8.28
 -23 -27  -6   23.48   14.78
  22  26   6   35.65   14.75
  22  26   6   30.08    8.95
 -22 -26  -6   68.82   21.16
  21  25   6   41.45    9.81
 -21 -25  -6   56.94   19.35
  20  24   6    2.53    4.61
  20  24   6    4.59    8.74
 -20 -24  -6    5.90    9.40
  19  23   6   28.75   12.59
  19  23   6   39.20    8.99
 -19 -23  -6   32.29    9.09
 -19 -23  -6   39.57   15.17
  18  22   6   83.11   19.82
  18  22   6   99.43   12.55
 -18 -22  -6  108.35   22.74
 -18 -22  -6   69.96   12.14
  17  21   6   19.24    6.18
  17  21   6    3.76    7.10
 -17 -21  -6    2.75    7.75
 -17 -21  -6   17.00    6.54
  16  20   6  166.21   14.70
  16  20   6  120.92   19.38
  15  19   6  244.35   17.69
  15  19   6  203.77   23.74
 -15 -19  -6  228.51   17.75
 -15 -19  -6  248.33   27.96
  14  18   6  233.38   24.25
  14  18   6  232.84   16.91
 -14 -18  -6  195.25   15.91
 -14 -18  -6  265.52   27.31
  13  17   6  173.92   13.90
  13  17   6  178.72   21.56
 -13 -17  -6  177.15   22.01
 -13 -17  -6  175.37   14.20
  12  16   6  409.59   23.77
  12  16   6  379.08   29.91
  12  16   6  361.61   31.94
 -12 -16  -6  379.72   22.14
 -12 -16  -6  397.29   32.36
  11  15   6   49.81   13.34
  11  15   6   48.75   11.65
  11  15   6   53.01    7.20
 -11 -15  -6   71.91    8.24
 -11 -15  -6   65.23   14.85
  10  14   6  440.19   23.26
  10  14   6  486.36   32.00
  10  14   6  467.34   34.34
 -10 -14  -6  450.89   23.59
 -10 -14  -6  457.94   33.23
   9  13   6  215.43   19.59
   9  13   6  198.39   20.88
   9  13   6  218.35   13.65
  -9 -13  -6  210.65   13.74
  -9 -13  -6  226.43   21.47
   8  12   6 1063.90   54.98
   8  12   6 1056.32   51.98
   8  12   6  997.22   43.13
  -8 -12  -6 1032.12   69.88
  -8 -12  -6  947.65   41.05
   7  11   6  669.19   39.21
   7  11   6  679.14   37.14
   7  11   6  682.68   29.78
  -7 -11  -6  663.35   29.33
  -7 -11  -6  677.35   38.45
  -7 -11  -6  637.37   35.20
   6  10   6   -2.60    3.53
   6  10   6   -2.57    1.15
   6  10   6   -1.29    1.42
   6  10   6    0.33    3.14
  -6 -10  -6    3.32    3.65
  -6 -10  -6   -4.14    2.81
   5   9   6  947.85   37.95
   5   9   6  930.10   37.84
   5   9   6  927.64   44.60
   5   9   6  903.05   45.94
  -5  -9  -6  928.07   44.06
  -5  -9  -6  941.96   46.28
   4   8   6  243.60   17.94
   4   8   6  233.43   11.87
   4   8   6  207.99   11.47
   4   8   6  224.72   16.26
  -4  -8  -6  220.70   15.93
  -4  -8  -6  233.54   17.38
   3   7   6   63.41    8.16
   3   7   6   77.00    9.49
   3   7   6   71.58    5.68
   3   7   6   67.31    5.61
  -3  -7  -6   86.27   10.05
  -3  -7  -6   65.37    8.12
   2   6   6   -0.41    2.84
   2   6   6    0.15    1.71
   2   6   6   -1.34    2.30
  -2  -6  -6   -2.09    2.19
  -2  -6  -6    1.27    1.71
  -2  -6  -6   -0.74    2.74
   1   5   6  305.06   17.14
   1   5   6  292.33   17.11
   1   5   6  267.38   13.85
  -1  -5  -6  258.22   13.19
  -1  -5  -6  245.82   15.60
  -1  -5  -6  278.42   16.12
   0   4   6   39.66    6.18
   0   4   6   46.43    5.08
   0  -4  -6   38.71    5.19
   0  -4  -6   39.91    5.89
   0  -4  -6   50.38    5.29
   0  -4  -6   40.59    5.79
  -1   3   6 1368.42   54.30
  -1   3   6 1284.63   51.62
  -1   3   6 1323.53   52.61
   1  -3  -6 1337.69   52.60
   1  -3  -6 1337.78   54.96
   1  -3  -6 1379.28   53.98
  -2   2   6    0.08    1.50
  -2   2   6    3.99    2.78
  -2   2   6    0.87    2.49
   2  -2  -6   -2.26    1.18
   2  -2  -6   -1.35    1.98
   2  -2  -6   -2.67    2.21
  -3   1   6 1333.64   54.34
  -3   1   6 1300.51   51.24
  -3   1   6 1356.22   54.33
   3  -1  -6 1373.40   52.30
   3  -1  -6 1345.36   55.04
   3  -1  -6 1347.79   55.45
  -4   0   6   43.51    4.70
  -4   0   6   46.75    6.62
  -4   0   6   29.52    5.86
   4   0  -6   43.36    5.86
   4   0  -6   40.56    4.61
   4   0  -6   35.93    6.41
  -5  -1   6  286.44   17.51
  -5  -1   6  313.04   15.64
  -5  -1   6  284.74   16.96
   5   1  -6  284.36   16.52
   5   1  -6  271.10   17.12
   5   1  -6  279.70   14.83
  -6  -2   6   -1.95    2.77
  -6  -2   6    3.87    3.17
  -6  -2   6    4.58    2.67
  -6  -2   6    5.01    3.55
   6   2  -6    4.63    4.11
   6   2  -6    1.73    2.62
  -7  -3   6   85.09    9.36
  -7  -3   6   75.93    8.15
  -7  -3   6   73.91    8.88
  -7  -3   6   72.74    8.48
   7   3  -6   69.90    8.00
   7   3  -6   71.10    8.91
  -8  -4   6  218.61   16.41
  -8  -4   6  200.71   15.34
  -8  -4   6  242.89   16.76
  -8  -4   6  249.24   16.23
   8   4  -6  226.73   16.13
   8   4  -6  237.94   16.27
   8   4  -6  229.51   17.20
  -9  -5   6  877.88   43.99
  -9  -5   6  977.10   44.24
  -9  -5   6  935.26   43.90
   9   5  -6  912.29   43.86
   9   5  -6  956.87   45.58
 -10  -6   6    4.55    3.71
 -10  -6   6   -3.57    2.13
 -10  -6   6    1.53    3.05
  10   6  -6   -3.65    1.80
  10   6  -6    0.38    3.72
  10   6  -6    0.77    3.65
 -11  -7   6  693.58   36.66
 -11  -7   6  668.84   35.60
 -11  -7   6  619.79   35.35
  11   7  -6  737.03   38.76
  11   7  -6  699.24   38.38
  11   7  -6  660.94   36.72
 -12  -8   6  937.65   47.54
 -12  -8   6  926.89   47.71
 -12  -8   6 1014.19   49.49
  12   8  -6  952.92   48.41
  12   8  -6  893.13   46.92
  12   8  -6  978.79   49.54
 -13  -9   6  234.58   20.57
  13   9  -6  187.04   18.00
  13   9  -6  241.24   20.01
  13   9  -6  199.20   19.56
 -14 -10   6  474.14   32.21
  14  10  -6  492.88   31.95
  14  10  -6  465.85   31.00
  14  10  -6  459.12   32.72
 -15 -11   6   62.69   13.69
  15  11  -6   43.72   10.95
  15  11  -6   63.32   12.58
  15  11  -6   75.60   15.19
 -16 -12   6  416.19   31.79
  16  12  -6  358.54   28.83
  16  12  -6  372.15   31.18
  16  12  -6  437.24   30.76
 -17 -13   6  217.16   22.85
  17  13  -6  188.75   20.69
  17  13  -6  212.22   23.38
  17  13  -6  198.50   21.11
 -18 -14   6  279.31   27.12
  18  14  -6  254.28   24.82
  18  14  -6  242.12   24.08
 -19 -15   6  224.90   25.17
  19  15  -6  214.54   23.46
  19  15  -6  237.29   24.88
 -20 -16   6  135.73   24.24
  20  16  -6  133.01   19.19
  20  16  -6  126.23   19.25
 -21 -17   6    8.63    8.12
  21  17  -6   17.86    9.47
  21  17  -6   13.59    8.97
 -22 -18   6  120.48   23.73
  22  18  -6   92.25   19.44
  22  18  -6   88.20   19.07
 -23 -19   6   72.15   18.87
  23  19  -6   51.48   14.37
  23  19  -6   33.45   13.43
 -24 -20   6    5.61    8.96
  24  20  -6   -7.76    5.25
  24  20  -6   -0.95    7.31
 -25 -21   6   36.42   15.81
  25  21  -6   40.58   15.05
  25  21  -6   61.06   18.22
 -26 -22   6   17.40   14.00
  26  22  -6   49.93   16.31
  26  22  -6   29.64   12.92
 -27 -23   6   42.42   17.90
  27  23  -6   54.01   16.74
  27  23  -6   44.02   17.43
  28  24  -6    7.21    9.86
  28  24  -6    1.15    9.96
  23  28   7  154.76   31.42
  22  27   7   18.81    6.75
  22  27   7   27.98   15.44
 -22 -27  -7   65.50   21.46
  21  26   7   21.22    6.91
  21  26   7   23.19   13.78
 -21 -26  -7   15.11   16.52
  20  25   7   65.54   10.46
  20  25   7  108.06   23.67
 -20 -25  -7   94.58   24.96
  19  24   7   21.03    6.99
  19  24   7   21.44   11.11
 -19 -24  -7    4.28    9.47
  18  23   7   -4.97    2.62
  18  23   7   -6.61    5.17
 -18 -23  -7   -3.47    5.79
 -18 -23  -7    0.41    4.35
  17  22   7   50.42   15.85
  17  22   7   71.26    9.99
 -17 -22  -7   54.80   16.94
  16  21   7  270.51   19.25
  16  21   7  316.96   30.99
 -16 -21  -7  299.46   20.93
 -16 -21  -7  297.05   32.06
  15  20   7    4.31    7.39
  15  20   7    9.32    4.54
 -15 -20  -7    1.66    7.04
 -15 -20  -7    2.84    4.04
  14  19   7   48.93    7.86
  14  19   7   40.91   13.20
 -14 -19  -7   60.97    8.80
 -14 -19  -7   31.98   11.89
  13  18   7  509.70   27.69
  13  18   7  588.77   39.88
 -13 -18  -7  486.66   26.89
 -13 -18  -7  509.41   39.06
  12  17   7   18.40   10.71
 -12 -17  -7   34.61   12.26
 -12 -17  -7   12.84    4.54
  11  16   7  127.00   16.42
  11  16   7   89.09    9.16
  11  16   7  117.28   18.23
 -11 -16  -7   86.53   17.05
 -11 -16  -7  100.17    9.65
  10  15   7  179.52   12.60
  10  15   7  174.36   18.86
 -10 -15  -7  187.54   13.12
 -10 -15  -7  176.75   20.28
   9  14   7   73.88   14.96
   9  14   7   98.38   13.55
   9  14   7  102.33    8.77
   9  14   7   97.55    8.81
  -9 -14  -7   75.11   14.98
  -9 -14  -7   84.26    8.05
   8  13   7   47.19   11.86
   8  13   7   45.69    5.96
   8  13   7   58.75    6.30
   8  13   7   59.66   11.73
  -8 -13  -7   42.97   11.85
   7  12   7    1.90    1.98
   7  12   7   -6.16    3.09
   7  12   7   -1.85    1.50
   7  12   7   -0.04    3.02
  -7 -12  -7   -0.83    3.83
   6  11   7  640.40   36.22
   6  11   7  576.10   36.94
   6  11   7  676.03   29.09
   6  11   7  707.04   29.38
  -6 -11  -7  700.10   38.99
  -6 -11  -7  659.20   36.00
   5  10   7   29.85    4.29
   5  10   7   31.52    8.24
   5  10   7   33.30    4.36
   5  10   7   27.74    7.42
  -5 -10  -7   23.43    6.51
  -5 -10  -7   29.98    8.15
   4   9   7  322.46   21.31
   4   9   7  315.17   21.98
   4   9   7  316.94   15.89
   4   9   7  324.86   15.87
  -4  -9  -7  267.72   21.70
  -4  -9  -7  320.98   21.51
   3   8   7  249.78   12.91
   3   8   7  245.64   17.84
   3   8   7  253.10   13.23
   3   8   7  209.44   16.44
  -3  -8  -7  263.48   17.49
  -3  -8  -7  240.66   17.87
   2   7   7  648.24   31.83
   2   7   7  645.49   31.92
   2   7   7  599.23   26.79
  -2  -7  -7  589.88   31.13
  -2  -7  -7  625.37   31.26
  -2  -7  -7  638.01   27.03
   1   6   7  614.22   30.94
   1   6   7  651.02   27.65
   1   6   7  623.82   30.68
  -1  -6  -7  689.49   33.21
  -1  -6  -7  691.81   29.81
  -1  -6  -7  694.07   32.94
   0   5   7  140.51    9.50
   0  -5  -7  137.13    9.92
   0  -5  -7  135.65    9.63
   0  -5  -7  148.10   11.00
   0  -5  -7  149.21   11.53
  -1   4   7  414.74   20.26
  -1   4   7  400.51   21.65
   1  -4  -7  414.33   20.67
   1  -4  -7  428.10   20.10
   1  -4  -7  424.65   22.41
   1  -4  -7  440.52   21.26
  -2   3   7  104.72    9.17
  -2   3   7  127.21   10.39
  -2   3   7  130.04    8.10
   2  -3  -7  136.28   10.57
   2  -3  -7  111.34    7.58
   2  -3  -7  110.59    9.37
  -3   2   7  124.14    7.79
  -3   2   7  125.25   10.41
  -3   2   7  117.63    9.96
   3  -2  -7  143.77   10.73
   3  -2  -7  101.47    7.09
   3  -2  -7  114.36    9.81
  -4   1   7  427.88   19.09
  -4   1   7  394.35   21.97
  -4   1   7  423.75   22.20
   4  -1  -7  401.03   21.76
   4  -1  -7  457.97   23.24
   4  -1  -7  418.92   19.07
  -5   0   7  134.76   11.21
  -5   0   7  141.64    9.21
  -5   0   7  152.03   12.03
   5   0  -7  132.03   13.31
   5   0  -7  146.66   11.42
   5   0  -7  140.00    9.18
  -6  -1   7  610.31   27.69
  -6  -1   7  617.85   31.00
   6   1  -7  656.87   32.04
   6   1  -7  691.42   33.61
   6   1  -7  652.88   29.65
  -7  -2   7  627.77   31.18
  -7  -2   7  629.85   29.16
  -7  -2   7  617.86   31.01
  -7  -2   7  598.42   31.64
   7   2  -7  637.15   32.50
   7   2  -7  602.29   29.17
  -8  -3   7  245.98   16.94
  -8  -3   7  239.06   17.12
  -8  -3   7  235.93   15.63
  -8  -3   7  249.86   17.79
   8   3  -7  247.86   18.19
   8   3  -7  245.14   16.24
  -9  -4   7  287.33   20.22
  -9  -4   7  312.25   20.51
  -9  -4   7  323.45   21.37
  -9  -4   7  344.21   20.30
   9   4  -7  282.28   18.94
   9   4  -7  319.37   21.48
 -10  -5   7   18.85    6.25
 -10  -5   7   43.73    9.81
 -10  -5   7   20.55    6.46
 -10  -5   7   28.68    6.68
  10   5  -7   27.57    7.70
  10   5  -7   25.62    7.05
  10   5  -7   27.93    7.08
 -11  -6   7  724.72   36.67
 -11  -6   7  630.40   35.94
 -11  -6   7  653.18   35.84
  11   6  -7  669.14   36.93
  11   6  -7  697.83   37.03
  11   6  -7  693.01   38.17
 -12  -7   7   -3.75    1.91
 -12  -7   7    0.89    3.38
 -12  -7   7   -3.13    2.36
  12   7  -7    2.29    3.86
  12   7  -7   -0.02    3.09
  12   7  -7   -1.16    3.27
 -13  -8   7   59.51   11.79
  13   8  -7   40.22    9.66
  13   8  -7   50.87   10.67
  13   8  -7   53.77   11.43
 -14  -9   7   81.67   12.27
  14   9  -7  112.01   13.85
  14   9  -7   75.74   12.38
  14   9  -7   83.22   15.25
 -15 -10   7  212.27   20.61
  15  10  -7  199.38   19.85
  15  10  -7  171.67   18.21
  15  10  -7  159.35   18.99
 -16 -11   7   98.65   14.68
  16  11  -7   95.99   14.83
  16  11  -7  126.93   17.27
  16  11  -7  103.20   15.48
 -17 -12   7   21.46    9.10
  17  12  -7   12.18    8.06
  17  12  -7   26.53    9.35
  17  12  -7   20.37    9.54
 -18 -13   7  511.05   37.64
  18  13  -7  563.98   39.46
  18  13  -7  631.55   46.39
 -19 -14   7   42.62   12.76
  19  14  -7   53.74   13.63
 -20 -15   7   26.26   11.29
  20  15  -7   13.84    8.32
  20  15  -7    1.82    6.04
 -21 -16   7  371.37   49.95
  21  16  -7  411.81   33.76
  21  16  -7  296.81   30.26
 -22 -17   7   41.13   14.82
  22  17  -7   49.33   14.87
  22  17  -7   48.53   13.61
 -23 -18   7   -2.79    5.75
  23  18  -7    4.95    8.10
  23  18  -7    4.38    7.48
 -24 -19   7   27.06   13.37
  24  19  -7   29.41   12.91
  24  19  -7   32.14   13.08
 -25 -20   7   76.75   21.20
  25  20  -7   73.33   18.51
  25  20  -7  110.74   22.75
 -26 -21   7   24.34   14.50
  26  21  -7   11.54   14.14
  26  21  -7    8.37   10.97
 -27 -22   7   28.11   15.58
  27  22  -7   54.53   19.17
  27  22  -7   36.54   15.67
 -28 -23   7  173.46   33.01
  28  23  -7  130.19   25.69
  28  23  -7  101.85   23.47
  23  29   8   55.24   18.97
  22  28   8  181.82   29.53
 -22 -28  -8  145.97   29.99
  21  27   8   -1.92    4.63
  21  27   8    7.57   10.29
 -21 -27  -8    1.14    9.78
  20  26   8   22.90    6.46
  20  26   8   43.05   16.02
 -20 -26  -8   30.25   15.38
  19  25   8   14.00    5.66
  19  25   8   36.45   14.01
 -19 -25  -8   -4.26    7.93
  18  24   8   -2.85    7.38
  18  24   8   14.04    5.54
  18  24   8    9.70    6.10
 -18 -24  -8   36.89   15.05
  17  23   8   -5.25    5.76
  17  23   8    3.34    4.39
  17  23   8    1.46    4.11
 -17 -23  -8   -2.53    6.42
  16  22   8  172.57   14.66
  16  22   8  199.68   15.73
  16  22   8  196.66   24.77
 -16 -22  -8  182.02   25.80
  15  21   8  309.36   30.81
  15  21   8  324.12   20.89
  15  21   8  340.31   20.87
 -15 -21  -8  349.31   34.54
  14  20   8  218.04   24.84
  14  20   8  196.05   15.23
  14  20   8  198.46   14.96
 -14 -20  -8  213.44   26.02
  13  19   8  140.62   19.39
  13  19   8  127.68   11.79
  13  19   8  136.30   11.89
 -13 -19  -8  154.03   21.55
  12  18   8  276.83   26.41
  12  18   8  266.57   17.45
  12  18   8  296.86   19.46
 -12 -18  -8  275.67   27.91
  11  17   8   59.36   15.79
  11  17   8   41.86    6.53
  11  17   8   44.19   14.03
  11  17   8   60.31    7.47
 -11 -17  -8   50.14   13.75
  10  16   8  345.34   27.97
  10  16   8  335.57   19.04
  10  16   8  324.33   18.71
  10  16   8  364.07   30.76
 -10 -16  -8  285.74   26.45
   9  15   8   37.98    5.67
   9  15   8   27.10    5.19
   9  15   8   33.86   11.18
   9  15   8   24.47    8.96
  -9 -15  -8   23.38    9.98
   8  14   8    0.49    2.02
   8  14   8   -1.34    2.01
   8  14   8    4.24    6.15
   8  14   8   -4.86    2.80
  -8 -14  -8   -2.68    3.41
   7  13   8   65.99    6.57
   7  13   8   56.81   12.01
   7  13   8   64.35   12.77
   7  13   8   57.05    6.25
  -7 -13  -8   48.08   11.04
   6  12   8  994.55   40.91
   6  12   8  980.92   51.56
   6  12   8 1002.07   49.78
   6  12   8  930.58   40.47
  -6 -12  -8 1017.19   52.57
   5  11   8  233.92   20.08
   5  11   8  240.65   13.37
   5  11   8  229.73   13.17
   5  11   8  226.14   18.67
  -5 -11  -8  224.27   17.91
  -5 -11  -8  222.23   19.20
   4  10   8  537.63   23.54
   4  10   8  468.77   29.87
   4  10   8  515.56   23.46
   4  10   8  472.56   29.22
  -4 -10  -8  521.71   30.45
  -4 -10  -8  481.09   28.49
   3   9   8  178.00   11.14
   3   9   8  204.43   11.95
   3   9   8  203.76   16.57
   3   9   8  174.04   15.24
  -3  -9  -8  165.74   14.29
  -3  -9  -8  168.01   14.89
   2   8   8   -2.19    2.49
   2   8   8   -6.57    2.36
   2   8   8   -1.03    1.68
  -2  -8  -8   -0.40    2.99
  -2  -8  -8    0.63    2.15
  -2  -8  -8   -0.04    2.80
   1   7   8  196.87   11.89
   1   7   8  186.30   14.68
   1   7   8  191.17   14.50
  -1  -7  -8  158.55   13.32
  -1  -7  -8  196.69   11.94
  -1  -7  -8  190.65   14.25
   0   6   8    4.57    2.77
   0   6   8    0.67    3.16
   0  -6  -8   -1.16    2.54
   0  -6  -8   -0.21    2.13
   0  -6  -8   -0.88    2.68
   0  -6  -8   -3.33    1.49
  -1   5   8 1191.88   48.70
  -1   5   8 1131.98   50.72
   1  -5  -8 1222.87   49.65
   1  -5  -8 1102.49   50.93
   1  -5  -8 1218.21   49.70
   1  -5  -8 1186.71   48.34
  -2   4   8  282.54   16.83
  -2   4   8  294.40   18.14
  -2   4   8  313.80   15.47
   2  -4  -8  291.88   14.98
   2  -4  -8  300.52   17.38
   2  -4  -8  303.39   18.21
   2  -4  -8  286.21   15.71
  -3   3   8   -2.88    2.19
  -3   3   8    0.94    1.60
  -3   3   8    3.55    2.92
   3  -3  -8    3.25    3.09
   3  -3  -8   -0.87    1.51
   3  -3  -8    2.68    2.98
  -4   2   8  286.09   14.62
  -4   2   8  296.62   18.13
  -4   2   8  333.76   19.11
   4  -2  -8  248.07   16.33
   4  -2  -8  265.51   17.03
   4  -2  -8  264.18   13.32
  -5   1   8 1184.65   46.05
  -5   1   8 1060.60   49.82
  -5   1   8 1178.98   50.22
   5  -1  -8 1203.96   51.94
   5  -1  -8 1191.34   50.74
   5  -1  -8 1117.84   46.39
  -6   0   8    2.16    3.20
  -6   0   8   -1.46    2.42
  -6   0   8   -1.17    1.65
   6   0  -8   -1.84    2.86
   6   0  -8    0.31    1.87
   6   0  -8   -0.03    2.70
  -7  -1   8  171.23   14.41
  -7  -1   8  190.07   12.25
  -7  -1   8  194.61   14.66
   7   1  -8  195.53   12.48
   7   1  -8  177.26   14.13
   7   1  -8  177.55   14.96
  -8  -2   8   -0.25    2.91
  -8  -2   8    0.73    3.26
  -8  -2   8   -0.80    2.34
  -8  -2   8    3.23    3.49
   8   2  -8    3.76    2.70
   8   2  -8   -0.80    3.30
  -9  -3   8  170.06   13.15
  -9  -3   8  166.32   14.41
  -9  -3   8  204.81   15.75
  -9  -3   8  180.55   15.84
   9   3  -8  186.37   14.07
   9   3  -8  176.59   15.97
 -10  -4   8  499.23   27.43
 -10  -4   8  491.35   29.03
 -10  -4   8  506.07   29.85
 -10  -4   8  504.38   29.73
  10   4  -8  555.04   33.52
  10   4  -8  528.28   31.70
 -11  -5   8  212.94   18.28
 -11  -5   8  241.09   17.78
 -11  -5   8  224.75   18.53
 -11  -5   8  241.65   18.60
  11   5  -8  230.91   19.10
  11   5  -8  191.63   16.58
 -12  -6   8  920.58   47.91
 -12  -6   8  967.82   47.13
 -12  -6   8  893.85   48.25
 -12  -6   8  974.62   47.87
  12   6  -8  946.35   49.44
  12   6  -8  947.99   47.77
 -13  -7   8   64.22   12.53
 -13  -7   8   54.29   10.86
  13   7  -8   52.45   11.87
  13   7  -8   61.13   11.80
  13   7  -8   76.30   11.26
 -14  -8   8    3.79    4.95
  14   8  -8   -2.39    3.36
  14   8  -8    4.70    5.39
  14   8  -8   -3.21    3.12
 -15  -9   8   29.36    8.74
  15   9  -8   13.07    6.86
  15   9  -8    8.28    6.37
  15   9  -8   29.82    9.21
 -16 -10   8  314.20   26.12
  16  10  -8  344.09   27.90
  16  10  -8  283.19   25.66
  16  10  -8  326.63   26.35
 -17 -11   8   46.21   12.59
  17  11  -8   41.21   12.80
  17  11  -8   55.57   12.70
  17  11  -8   47.28   12.17
 -18 -12   8  244.37   24.58
  18  12  -8  257.60   26.54
  18  12  -8  314.64   27.74
 -19 -13   8  137.35   19.18
  19  13  -8  130.83   18.67
  19  13  -8  174.51   21.06
 -20 -14   8  162.76   21.33
  20  14  -8  193.71   23.22
  20  14  -8  193.24   22.92
 -21 -15   8  370.03   33.86
  21  15  -8  354.75   31.70
  21  15  -8  310.03   30.44
 -22 -16   8  173.21   24.03
  22  16  -8  126.37   20.60
  22  16  -8  228.26   25.68
 -23 -17   8   14.38    9.93
  23  17  -8    5.18    7.68
  23  17  -8   -0.41    7.80
 -24 -18   8    5.82    8.24
  24  18  -8   17.59   10.78
  24  18  -8   18.88   11.04
 -25 -19   8   20.83   12.10
  25  19  -8   15.32   10.63
  25  19  -8   11.69   11.17
 -26 -20   8    2.66    8.23
  26  20  -8   55.24   18.62
  26  20  -8   21.27   12.80
 -27 -21   8   16.74   18.86
  27  21  -8   -2.62    7.82
  27  21  -8    3.06    9.82
 -28 -22   8  194.10   30.65
  28  22  -8  159.12   30.20
  28  22  -8  203.87   28.75
  29  23  -8   30.13   14.87
  29  23  -8   50.23   18.22
  22  29   9    1.62   10.90
  21  28   9    2.27   10.15
 -21 -28  -9   -0.07   12.00
  20  27   9   18.57   12.34
 -20 -27  -9   19.85   14.50
  19  26   9   53.57   18.29
  19  26   9   20.24    7.55
 -19 -26  -9   21.48   14.85
  18  25   9  106.46   22.78
  18  25   9   81.99    9.67
 -18 -25  -9   99.89   23.96
  17  24   9   -0.11    2.98
  17  24   9    3.32    9.95
  17  24   9    9.83    4.85
 -17 -24  -9   12.56   11.19
  16  23   9    3.21    7.19
  16  23   9    8.68    4.61
  16  23   9    6.17    3.83
 -16 -23  -9    0.36    8.06
  15  22   9  283.90   17.94
  15  22   9  258.65   17.89
  15  22   9  303.72   30.98
 -15 -22  -9  255.98   30.08
  14  21   9   22.64    6.23
  14  21   9   31.35   12.47
  14  21   9   32.12    7.48
 -14 -21  -9   39.65   22.30
  13  20   9  146.15   12.09
  13  20   9   94.83   19.68
 -13 -20  -9  132.23   20.75
  12  19   9  387.60   21.69
  12  19   9  359.80   31.82
  12  19   9  395.78   21.46
 -12 -19  -9  473.53   38.28
  11  18   9  328.46   19.20
  11  18   9  363.10   20.00
  11  18   9  351.27   29.96
 -11 -18  -9  314.39   29.71
  10  17   9  308.78   31.47
  10  17   9  281.33   16.80
  10  17   9  286.83   17.15
  10  17   9  286.10   28.39
 -10 -17  -9  296.14   27.88
   9  16   9    4.68    5.99
   9  16   9    0.80    2.68
   9  16   9    2.28    2.68
   9  16   9    1.07    5.94
  -9 -16  -9   -4.35    4.29
   8  15   9   30.43    5.44
   8  15   9   21.72    9.01
   8  15   9   25.44    9.00
   8  15   9   33.00    5.32
  -8 -15  -9   21.91    8.31
   7  14   9   95.86   14.40
   7  14   9   78.92    7.58
   7  14   9   88.79   12.80
   7  14   9   78.88    7.58
  -7 -14  -9   74.29   14.45
   6  13   9  208.99   12.93
   6  13   9  174.10   18.94
   6  13   9  207.33   19.05
   6  13   9  218.52   13.01
   5  12   9  140.01   15.09
   5  12   9  139.23    9.77
   5  12   9  124.66    9.46
   5  12   9  136.54   15.73
  -5 -12  -9  137.44   15.58
   4  11   9 1325.06   54.29
   4  11   9 1305.72   53.95
   4  11   9 1369.18   62.67
   4  11   9 1374.07   63.48
  -4 -11  -9 1339.36   61.70
  -4 -11  -9 1263.12   59.78
   3  10   9  906.64   38.27
   3  10   9  878.20   38.62
   3  10   9  910.51   45.33
   3  10   9  905.02   44.99
  -3 -10  -9  994.39   47.50
  -3 -10  -9  905.38   45.94
   2   9   9   58.38    8.87
   2   9   9   59.86   11.94
   2   9   9   59.19    6.39
  -2  -9  -9   61.23    6.62
  -2  -9  -9   58.35    9.06
  -2  -9  -9   76.19    9.67
   1   8   9  109.01   11.04
   1   8   9  102.92    8.61
   1   8   9   94.41   10.72
  -1  -8  -9  105.86    8.72
  -1  -8  -9   79.12   17.45
  -1  -8  -9   87.44   10.09
   0   7   9   89.35   10.22
   0   7   9   91.62    8.38
   0  -7  -9  106.77   10.26
   0  -7  -9  102.14   10.79
   0  -7  -9  110.23    9.40
   0  -7  -9  105.91    9.48
  -1   6   9  157.05   13.72
  -1   6   9  185.10   12.48
   1  -6  -9  172.85   12.67
   1  -6  -9  200.15   14.60
   1  -6  -9  159.84   11.41
   1  -6  -9  175.05   12.52
  -2   5   9 1294.38   57.37
  -2   5   9 1347.15   55.62
   2  -5  -9 1342.38   55.24
   2  -5  -9 1365.01   52.42
   2  -5  -9 1225.38   55.84
   2  -5  -9 1239.74   52.94
  -3   4   9 1538.76   65.06
  -3   4   9 1532.79   59.96
  -3   4   9 1507.84   63.56
   3  -4  -9 1494.54   65.05
   3  -4  -9 1492.56   60.27
   3  -4  -9 1669.29   65.49
  -4   3   9 1508.17   59.48
  -4   3   9 1563.29   65.02
  -4   3   9 1515.61   64.26
   4  -3  -9 1535.08   59.86
   4  -3  -9 1557.86   65.36
   4  -3  -9 1535.80   65.04
  -5   2   9 1330.41   57.13
  -5   2   9 1314.89   51.75
  -5   2   9 1268.22   56.67
   5  -2  -9 1310.84   51.50
   5  -2  -9 1271.16   56.39
   5  -2  -9 1335.25   57.58
  -6   1   9  175.09   10.78
  -6   1   9  168.34   13.98
  -6   1   9  172.94   13.83
   6  -1  -9  183.66   14.76
   6  -1  -9  156.67   13.35
   6  -1  -9  164.11   10.42
  -7   0   9   99.03   10.68
  -7   0   9  110.12    8.59
  -7   0   9   87.82   10.33
   7   0  -9  112.89   11.85
   7   0  -9   91.27    8.09
   7   0  -9   99.98   10.52
  -8  -1   9  115.80    9.53
  -8  -1   9  106.40   11.24
   8   1  -9   87.44   10.18
   8   1  -9  101.34   11.56
   8   1  -9   89.79    8.55
  -9  -2   9   71.56    8.03
  -9  -2   9   64.82   12.00
  -9  -2   9   72.49    9.74
  -9  -2   9   57.65   10.60
   9   2  -9   64.46    8.01
   9   2  -9   69.08   10.16
 -10  -3   9  964.41   46.42
 -10  -3   9  956.32   43.35
 -10  -3   9  903.75   45.71
 -10  -3   9  920.89   46.73
  10   3  -9  974.01   48.64
  10   3  -9  942.70   44.33
 -11  -4   9 1292.64   61.84
 -11  -4   9 1347.67   58.71
 -11  -4   9 1249.87   60.38
 -11  -4   9 1373.01   61.64
  11   4  -9 1306.83   59.46
  11   4  -9 1353.68   63.68
 -12  -5   9  141.37   14.76
 -12  -5   9  126.39   12.98
 -12  -5   9  114.28   13.30
  12   5  -9  122.74   13.25
  12   5  -9  122.68   14.94
 -13  -6   9  205.62   18.57
 -13  -6   9  196.00   17.36
  13   6  -9  200.67   17.96
  13   6  -9  189.01   18.81
 -14  -7   9   77.23   11.87
 -14  -7   9   73.14   11.90
  14   7  -9   86.13   12.63
  14   7  -9   82.33   13.17
 -15  -8   9   26.06    9.09
 -15  -8   9   30.58    8.71
  15   8  -9   45.64   12.11
  15   8  -9   48.10   11.30
 -16  -9   9    2.98    4.36
 -16  -9   9   -6.94    3.29
  16   9  -9   -0.50    4.47
  16   9  -9    7.92    6.51
  16   9  -9   -4.13    3.27
 -17 -10   9  257.75   23.89
 -17 -10   9  254.29   24.60
  17  10  -9  245.84   23.74
  17  10  -9  320.64   27.31
  17  10  -9  276.37   25.67
 -18 -11   9  335.41   28.79
  18  11  -9  289.24   27.59
  18  11  -9  302.78   31.60
  18  11  -9  318.53   28.47
 -19 -12   9  393.99   32.44
  19  12  -9  376.22   31.38
  19  12  -9  388.91   32.67
 -20 -13   9  121.10   19.10
  20  13  -9  104.77   16.99
  20  13  -9  164.49   21.20
 -21 -14   9   34.65   12.07
  21  14  -9   34.16   12.48
  21  14  -9    6.61    7.19
  22  15  -9  256.83   28.50
  22  15  -9  327.99   31.11
 -23 -16   9    3.76    7.71
  23  16  -9    5.78    7.61
  23  16  -9    2.94    8.20
 -24 -17   9    9.03    9.66
  24  17  -9   10.22    8.17
  24  17  -9   11.96    9.64
 -25 -18   9   78.83   21.10
  25  18  -9  111.66   23.96
  25  18  -9  127.14   24.80
 -26 -19   9   52.28   17.62
  26  19  -9   65.66   18.64
  26  19  -9   47.92   16.21
 -27 -20   9   20.56   13.71
  27  20  -9   14.27   11.10
  27  20  -9   -4.94    7.34
 -28 -21   9   16.39   12.82
 -28 -21   9   11.96   11.17
  28  21  -9   40.47   16.48
  28  21  -9   27.75   13.89
 -29 -22   9   15.52   13.27
 -29 -22   9   27.21   17.31
  29  22  -9   11.12   11.75
  29  22  -9   17.52   12.38
  21  29  10  216.89   32.03
  20  28  10   67.56   20.16
 -20 -28 -10   35.59   17.83
  19  27  10   72.96   21.32
 -19 -27 -10   73.69   33.93
  18  26  10   26.00   14.60
  18  26  10   21.01    5.02
 -18 -26 -10   64.26   19.92
  17  25  10   41.14   15.52
  17  25  10   62.83   10.02
  17  25  10   55.45    7.58
 -17 -25 -10   41.54   16.35
  16  24  10   47.56    7.47
  16  24  10   57.75   17.57
  16  24  10   56.92    8.95
 -16 -24 -10   47.62   16.41
  15  23  10  169.27   23.49
  15  23  10  157.12   14.36
  15  23  10  150.46   12.31
 -15 -23 -10  163.49   25.53
  14  22  10  127.69   11.22
  14  22  10  113.95   22.17
  14  22  10  107.36   10.39
 -14 -22 -10   91.36   21.20
  13  21  10  335.81   31.97
  13  21  10  341.20   19.69
  13  21  10  330.97   19.09
 -13 -21 -10  360.61   34.55
  12  20  10    7.61    4.09
  12  20  10   -2.20    5.79
  12  20  10    3.91    3.28
 -12 -20 -10    0.13    6.84
  11  19  10  113.03   17.50
  11  19  10   66.36    7.88
  11  19  10   89.42    8.58
 -11 -19 -10   75.23   16.87
  10  18  10   -2.65    4.88
  10  18  10   -2.10    2.24
  10  18  10   -0.29    2.54
  10  18  10   -0.72    6.48
 -10 -18 -10    8.32    6.87
   9  17  10  315.11   17.45
   9  17  10  281.15   16.67
   9  17  10  272.90   27.62
   9  17  10  322.17   36.63
  -9 -17 -10  256.28   25.68
   8  16  10  353.39   18.33
   8  16  10  307.27   26.19
   8  16  10  295.09   17.54
   8  16  10  339.69   35.05
  -8 -16 -10  299.13   26.80
   7  15  10  190.68   12.47
   7  15  10  164.35   19.73
   7  15  10  198.25   19.98
   7  15  10  187.85   12.41
  -7 -15 -10  229.73   22.21
   6  14  10  483.61   23.86
   6  14  10  483.39   23.96
   6  14  10  527.55   34.82
   6  14  10  483.99   32.47
  -6 -14 -10  464.19   32.21
   5  13  10  892.47   46.64
   5  13  10  859.62   37.14
   5  13  10  832.95   37.12
   5  13  10  815.96   46.55
  -5 -13 -10  915.15   49.33
   4  12  10  848.15   44.21
   4  12  10  745.96   42.22
   4  12  10  769.92   34.61
   4  12  10  790.70   35.09
  -4 -12 -10  806.85   43.73
   3  11  10 2521.66  107.60
   3  11  10 2605.92  100.31
   3  11  10 2661.94  108.34
   3  11  10 2532.29   99.47
  -3 -11 -10 2715.71  116.98
  -3 -11 -10 2660.73  111.51
   2  10  10   -5.37    1.77
   2  10  10   -1.15    2.96
   2  10  10    2.02    2.16
  -2 -10 -10    0.06    2.33
  -2 -10 -10   -3.12    2.59
  -2 -10 -10   -1.17    2.79
   1   9  10  267.51   19.97
   1   9  10  302.03   19.98
   1   9  10  273.73   16.34
  -1  -9 -10  277.02   19.38
  -1  -9 -10  244.87   19.04
  -1  -9 -10  303.57   17.11
   0   8  10  263.60   15.91
   0   8  10  245.71   18.61
   0  -8 -10  284.10   17.39
   0  -8 -10  276.65   16.83
   0  -8 -10  284.39   18.53
   0  -8 -10  246.90   18.71
  -1   7  10  201.11   16.43
  -1   7  10  221.05   14.55
   1  -7 -10  211.69   13.53
   1  -7 -10  187.27   13.77
   1  -7 -10  209.41   14.48
   1  -7 -10  174.63   17.65
  -2   6  10  120.34   11.99
  -2   6  10  131.59   11.13
   2  -6 -10  143.82   11.05
   2  -6 -10  142.65   17.99
   2  -6 -10  139.23   10.15
   2  -6 -10  129.74   12.42
  -3   5  10  165.94   12.89
  -3   5  10  147.99   13.30
   3  -5 -10  162.64   13.63
   3  -5 -10  152.95   10.07
   3  -5 -10  145.22   10.75
   3  -5 -10  164.44   13.17
  -4   4  10   -2.31    2.32
  -4   4  10    1.82    3.57
  -4   4  10    0.63    1.66
   4  -4 -10    1.87    1.75
   4  -4 -10    5.42    4.08
   4  -4 -10    2.42    3.35
  -5   3  10  171.85   14.12
  -5   3  10  168.36   10.24
  -5   3  10  161.23   13.90
   5  -3 -10  148.40   13.04
   5  -3 -10  157.71   13.83
   5  -3 -10  155.17    9.61
  -6   2  10   95.10   11.26
  -6   2  10  132.88    8.87
  -6   2  10  136.99   12.63
   6  -2 -10  145.22   13.65
   6  -2 -10  138.61    9.20
   6  -2 -10  121.04   12.12
  -7   1  10  204.96   16.04
  -7   1  10  218.04   16.84
  -7   1  10  198.14   12.31
   7  -1 -10  197.14   12.33
   7  -1 -10  249.25   18.25
   7  -1 -10  193.25   15.78
  -8   0  10  289.59   16.41
  -8   0  10  280.56   19.83
  -8   0  10  288.85   20.50
   8   0 -10  288.72   21.33
   8   0 -10  288.84   16.52
  -9  -1  10  284.92   20.19
  -9  -1  10  283.76   16.75
  -9  -1  10  248.13   19.75
   9   1 -10  271.52   16.75
   9   1 -10  256.82   20.54
   9   1 -10  258.54   19.23
 -10  -2  10    2.31    3.54
 -10  -2  10    1.78    3.75
 -10  -2  10   -0.93    2.12
 -10  -2  10    2.57    3.95
  10   2 -10    0.79    3.00
  10   2 -10    0.39    2.81
 -11  -3  10 2675.80  110.44
 -11  -3  10 2612.76  106.16
 -11  -3  10 2718.25  110.41
 -11  -3  10 2605.99  117.08
  11   3 -10 2526.59  107.97
  11   3 -10 2544.79  102.87
 -12  -4  10  810.25   39.36
 -12  -4  10  744.84   42.13
 -12  -4  10  749.21   41.53
  12   4 -10  780.19   44.22
  12   4 -10  809.62   40.87
 -13  -5  10  937.27   46.04
 -13  -5  10  901.89   48.26
  13   5 -10  911.42   49.30
  13   5 -10  874.58   45.47
 -14  -6  10  515.69   33.40
 -14  -6  10  518.94   31.54
  14   6 -10  490.64   30.99
  14   6 -10  447.37   32.22
 -15  -7  10  175.52   18.28
 -15  -7  10  157.19   16.63
  15   7 -10  168.70   19.39
  15   7 -10  175.98   18.05
 -16  -8  10  360.78   28.56
 -16  -8  10  371.90   27.55
  16   8 -10  309.49   25.83
  16   8 -10  316.86   27.34
 -17  -9  10  248.93   24.46
 -17  -9  10  279.96   24.23
  17   9 -10  283.74   26.16
  17   9 -10  265.43   24.76
 -18 -10  10   -3.98    4.58
 -18 -10  10    8.99    6.51
  18  10 -10    0.19    4.74
  18  10 -10   -4.63    7.58
 -19 -11  10   79.63   15.84
 -19 -11  10   82.14   16.99
  19  11 -10   63.90   14.74
  19  11 -10  119.26   21.34
 -20 -12  10   13.76    8.64
 -20 -12  10    2.59    6.02
  20  12 -10    0.56    5.84
  20  12 -10   10.11    8.41
 -21 -13  10  337.41   31.27
 -21 -13  10  292.07   29.26
  21  13 -10  328.99   30.40
  21  13 -10  319.22   30.74
 -22 -14  10   95.98   19.72
 -22 -14  10  126.37   23.12
  22  14 -10  147.37   21.34
  22  14 -10  138.99   21.97
 -23 -15  10  126.32   23.55
 -23 -15  10  149.25   22.88
  23  15 -10  131.46   24.32
  23  15 -10  150.62   26.74
 -24 -16  10   57.50   17.09
 -24 -16  10   68.16   18.06
  24  16 -10   85.93   20.00
  24  16 -10   52.51   16.79
 -25 -17  10   81.82   21.03
 -25 -17  10   93.52   21.45
  25  17 -10   46.74   16.20
  25  17 -10   72.23   19.17
 -26 -18  10   22.06   12.86
 -26 -18  10    1.70    8.42
  26  18 -10   13.61   10.43
  26  18 -10   41.10   15.88
 -27 -19  10   83.21   22.10
 -27 -19  10   59.81   18.77
  27  19 -10   80.41   21.78
 -28 -20  10   91.32   35.94
 -28 -20  10   62.03   20.39
  28  20 -10   88.19   30.75
 -29 -21  10  124.07   27.44
 -29 -21  10  128.74   28.59
  29  21 -10  144.57   28.44
  20  29  11   99.23   24.98
 -20 -29 -11   97.87   25.56
  19  28  11    2.96    9.40
 -19 -28 -11    3.20   11.42
  18  27  11  353.83   38.72
 -18 -27 -11  354.62   40.89
  17  26  11    3.61    2.19
 -17 -26 -11   13.14   12.36
  16  25  11   43.89    5.69
  16  25  11   59.77   17.40
  16  25  11   42.53    5.86
 -16 -25 -11   57.14   18.50
  15  24  11   50.46   16.56
  15  24  11   33.83    5.51
  15  24  11   30.12    5.59
 -15 -24 -11   29.22   14.58
  14  23  11   -0.14    2.43
  14  23  11    1.79    6.65
  14  23  11   -0.94    2.67
 -14 -23 -11    7.00    8.71
  13  22  11    5.35    3.35
  13  22  11    9.41    3.90
  13  22  11   -4.73    6.81
 -13 -22 -11   13.42    9.69
  12  21  11   29.08   12.33
  12  21  11   39.80    6.20
  12  21  11   37.19    5.99
 -12 -21 -11   32.35   13.31
  11  20  11    0.07    2.65
  11  20  11  -10.69    3.93
  11  20  11    3.35    2.59
 -11 -20 -11   -9.74    4.24
  10  19  11   74.44    7.91
  10  19  11  103.23   16.50
  10  19  11   71.40    7.83
 -10 -19 -11  117.03   21.70
   9  18  11  322.41   30.45
   9  18  11  336.44   18.56
   9  18  11  323.57   18.52
   9  18  11  398.66   31.41
  -9 -18 -11  316.92   29.11
   8  17  11   44.59   12.90
   8  17  11   34.44    6.04
   8  17  11   47.83    6.29
   8  17  11   32.45   19.76
  -8 -17 -11   53.83   14.25
   7  16  11  115.76   16.92
   7  16  11   95.10    8.89
   7  16  11  111.57    9.27
   7  16  11   95.60   15.09
  -7 -16 -11   91.77   14.94
   6  15  11   64.47    6.96
   6  15  11   25.32    8.89
   6  15  11   61.93   13.33
   6  15  11   48.53    6.39
  -6 -15 -11   37.57   10.29
   5  14  11  133.25   10.35
   5  14  11  155.51   17.26
   5  14  11  125.04   16.05
   5  14  11  129.94   10.40
  -5 -14 -11  144.71   16.60
   4  13  11   90.59    8.63
   4  13  11   71.55   13.57
   4  13  11   94.24   13.07
   4  13  11  109.28    9.51
  -4 -13 -11  104.25   14.08
   3  12  11   26.01    7.68
   3  12  11   22.13    5.33
   3  12  11   19.29    7.07
   3  12  11   22.27    5.13
  -3 -12 -11   10.57    6.09
   2  11  11 1500.43   61.96
   2  11  11 1517.05   69.20
   2  11  11 1498.49   68.28
  -2 -11 -11 1464.60   66.89
  -2 -11 -11 1475.33   61.16
   1  10  11   26.86    6.83
   1  10  11   31.56    7.99
   1  10  11   26.69    5.65
  -1 -10 -11   40.54    7.71
  -1 -10 -11   41.16    9.15
  -1 -10 -11   33.30    6.07
  -1 -10 -11   23.15    7.10
   0   9  11    4.21    4.06
   0   9  11    1.68    2.74
   0  -9 -11    1.19    2.90
   0  -9 -11   -3.81    2.34
   0  -9 -11    5.45    4.21
   0  -9 -11    0.23    2.32
  -1   8  11  392.34   22.46
  -1   8  11  429.55   26.33
   1  -8 -11  417.80   23.59
   1  -8 -11  416.18   25.48
   1  -8 -11  379.94   22.66
   1  -8 -11  388.48   21.70
  -2   7  11  261.03   17.22
  -2   7  11  258.08   19.25
   2  -7 -11  276.24   19.39
   2  -7 -11  260.87   16.72
   2  -7 -11  283.97   18.25
   2  -7 -11  246.27   15.39
  -3   6  11  101.11   10.37
  -3   6  11  100.98   11.63
   3  -6 -11  120.84   12.38
   3  -6 -11  113.78   11.31
   3  -6 -11  119.00    9.88
   3  -6 -11  111.25    8.74
  -4   5  11  309.20   16.40
  -4   5  11  324.21   21.64
  -4   5  11  302.08   19.94
   4  -5 -11  271.78   20.12
   4  -5 -11  350.28   21.49
   4  -5 -11  296.63   16.95
   4  -5 -11  343.48   16.70
  -5   4  11  355.07   22.51
  -5   4  11  271.64   20.03
  -5   4  11  342.70   16.70
   5  -4 -11  308.91   21.04
   5  -4 -11  308.81   15.83
   5  -4 -11  317.59   21.17
  -6   3  11  119.29   12.31
  -6   3  11  106.87    8.02
  -6   3  11  108.66   11.82
   6  -3 -11  104.98    7.83
   6  -3 -11  106.54   12.03
   6  -3 -11  103.60   11.33
  -7   2  11  255.70   19.30
  -7   2  11  254.26   19.24
  -7   2  11  273.77   14.72
   7  -2 -11  266.25   14.52
   7  -2 -11  267.20   20.05
   7  -2 -11  252.43   18.93
  -8   1  11  479.39   27.04
  -8   1  11  391.39   20.68
  -8   1  11  401.76   26.07
   8  -1 -11  403.88   26.48
   8  -1 -11  404.91   20.37
   8  -1 -11  370.71   24.43
  -9   0  11    5.08    4.43
  -9   0  11    3.47    2.74
  -9   0  11   -0.53    3.00
   9   0 -11   -3.86    2.84
   9   0 -11    0.25    2.16
   9   0 -11   -1.34    3.04
 -10  -1  11   17.99    6.94
 -10  -1  11   33.68    9.04
 -10  -1  11   50.60   10.08
 -10  -1  11   25.71    5.59
  10   1 -11   22.55    7.08
  10   1 -11   31.94    8.71
  10   1 -11   27.40    5.85
 -11  -2  11 1511.26   69.28
 -11  -2  11 1536.63   69.46
 -11  -2  11 1501.20   64.28
  11   2 -11 1456.24   72.01
  11   2 -11 1635.18   67.01
 -12  -3  11   15.04    6.98
 -12  -3  11   24.18    6.39
  12   3 -11   29.17    7.30
  12   3 -11   22.03    8.57
 -13  -4  11  102.63   13.67
 -13  -4  11  102.49   11.76
  13   4 -11   93.39   11.57
  13   4 -11   80.27   14.47
 -14  -5  11  108.50   14.77
 -14  -5  11  150.36   14.57
  14   5 -11  114.43   16.04
  14   5 -11  146.60   15.25
 -15  -6  11   67.31   18.48
 -15  -6  11   57.24   12.13
  15   6 -11   55.54   12.43
  15   6 -11   61.49   12.04
 -16  -7  11   98.06   13.47
 -16  -7  11   99.91   15.05
  16   7 -11  121.94   15.80
  16   7 -11  121.01   16.68
 -17  -8  11   33.71    9.64
 -17  -8  11   59.42   13.64
  17   8 -11   71.77   15.80
  17   8 -11   48.24   12.54
 -18  -9  11  336.01   36.82
 -18  -9  11  378.73   29.10
  18   9 -11  338.25   29.66
  18   9 -11  314.73   27.81
 -19 -10  11   69.41   14.61
 -19 -10  11   88.14   17.31
  19  10 -11   75.68   16.77
  19  10 -11  125.36   18.29
 -20 -11  11   -6.63    4.84
 -20 -11  11   -1.25    4.71
  20  11 -11   -0.60    5.37
 -21 -12  11   72.18   17.57
 -21 -12  11   43.30   13.62
  21  12 -11   34.06   13.28
 -22 -13  11   16.00   10.17
 -22 -13  11   13.50    8.57
  22  13 -11   -1.57    7.59
 -23 -14  11   -6.64    5.81
 -23 -14  11   -0.35    7.57
  23  14 -11    0.36    7.80
 -24 -15  11   14.09    9.44
 -24 -15  11   36.69   13.29
  24  15 -11   38.37   14.46
 -25 -16  11   50.08   16.32
 -25 -16  11   52.49   16.52
  25  16 -11   27.23   13.27
 -26 -17  11   -0.97    7.00
 -26 -17  11   15.13   12.52
  26  17 -11   -5.07    6.06
 -27 -18  11  329.45   44.85
 -27 -18  11  261.29   32.88
  27  18 -11  297.36   34.68
 -28 -19  11    3.29    9.40
 -28 -19  11    3.45    9.57
 -29 -20  11   14.75   13.09
 -29 -20  11   73.29   20.83
  29  20 -11   73.42   21.43
  19  29  12  278.23   35.93
 -19 -29 -12  221.49   34.00
  18  28  12   -1.51    9.34
 -18 -28 -12   13.21   14.06
  17  27  12  156.10   30.50
 -17 -27 -12  133.32   27.32
  16  26  12  123.67   40.15
 -16 -26 -12  119.29   26.02
  15  25  12  203.17    9.83
  15  25  12  177.23   26.17
 -15 -25 -12  230.20   30.96
  14  24  12   83.38   20.23
  14  24  12   89.02    7.19
  14  24  12   81.46    6.87
 -14 -24 -12   88.76   21.65
  13  23  12  160.32   10.72
  13  23  12  154.13   10.71
  13  23  12  198.03   25.70
 -13 -23 -12  171.17   25.27
  12  22  12    0.42    2.52
  12  22  12    0.76    2.29
  12  22  12   -1.85    6.96
  11  21  12   28.34    5.47
  11  21  12   26.52   11.52
  11  21  12   37.43    5.81
 -11 -21 -12   33.87   12.70
  10  20  12    7.69    3.47
  10  20  12    8.41    7.30
  10  20  12    7.87    3.43
 -10 -20 -12   12.80    8.19
   9  19  12  401.27   21.14
   9  19  12  440.92   34.51
   9  19  12  398.34   21.22
  -9 -19 -12  419.40   34.80
   8  18  12  252.74   26.91
   8  18  12  271.87   16.11
   8  18  12  253.29   25.25
   8  18  12  267.73   16.12
  -8 -18 -12  300.12   28.30
   7  17  12   35.34   11.32
   7  17  12   28.82    5.58
   7  17  12   19.29    8.89
   7  17  12   20.23    4.87
  -7 -17 -12   34.61   11.09
   6  16  12  376.88   21.29
   6  16  12  401.93   21.44
   6  16  12  449.56   33.01
   6  16  12  436.07   31.56
  -6 -16 -12  443.88   32.97
   5  15  12   88.70   14.39
   5  15  12   90.39   13.93
   5  15  12   90.27    8.63
   5  15  12   89.92    8.83
  -5 -15 -12   91.78   14.24
   4  14  12  193.06   19.12
   4  14  12  164.54   12.33
   4  14  12  180.06   18.52
   4  14  12  169.11   12.76
  -4 -14 -12  156.79   17.93
   3  13  12  115.25   14.36
   3  13  12  103.39   13.67
   3  13  12   93.76    9.10
   3  13  12   85.40    9.42
  -3 -13 -12  100.32   13.38
   2  12  12   -0.33    3.70
   2  12  12   -3.51    1.84
   2  12  12   -1.06    3.61
  -2 -12 -12   -2.42    3.27
  -2 -12 -12   -0.75    2.52
   1  11  12 1209.87   53.11
   1  11  12 1266.65   60.03
  -1 -11 -12 1282.44   54.60
  -1 -11 -12 1186.13   55.38
  -1 -11 -12 1203.87   57.22
   0  10  12   -1.62    2.00
   0  10  12    1.54    3.70
   0 -10 -12   -2.96    2.17
   0 -10 -12    0.77    3.57
   0 -10 -12    0.89    2.74
  -1   9  12 1433.55   60.91
  -1   9  12 1393.22   65.04
   1  -9 -12 1426.09   62.08
   1  -9 -12 1427.98   60.98
   1  -9 -12 1440.08   66.70
   1  -9 -12 1460.72   62.74
  -2   8  12  639.93   35.89
  -2   8  12  642.01   32.66
   2  -8 -12  627.15   35.01
   2  -8 -12  641.89   32.97
   2  -8 -12  625.44   31.57
   2  -8 -12  633.29   30.42
  -3   7  12   44.29    9.15
  -3   7  12   45.48    8.53
   3  -7 -12   37.26    7.96
   3  -7 -12   48.41    6.77
   3  -7 -12   38.53    5.56
   3  -7 -12   51.24   10.17
  -4   6  12   62.51    9.47
  -4   6  12   55.32    8.51
   4  -6 -12   43.81    8.83
   4  -6 -12   44.25    6.33
   4  -6 -12   34.25    8.15
   4  -6 -12   58.62    6.01
  -5   5  12   -2.31    2.17
  -5   5  12   -1.96    2.53
  -5   5  12   -0.25    1.79
   5  -5 -12    1.65    3.40
   5  -5 -12   -3.64    2.56
   5  -5 -12   -0.30    1.58
  -6   4  12   43.03    5.25
  -6   4  12   60.90    9.19
  -6   4  12   37.41    8.65
   6  -4 -12   50.89    5.44
   6  -4 -12   42.19    9.16
   6  -4 -12   64.28    9.36
  -7   3  12   57.07    9.21
  -7   3  12   50.29   10.13
  -7   3  12   38.66    5.08
   7  -3 -12   47.24    9.63
   7  -3 -12   33.16    8.15
   7  -3 -12   45.43    5.32
  -8   2  12  643.41   28.94
  -8   2  12  626.37   35.31
  -8   2  12  625.52   35.58
   8  -2 -12  605.59   27.37
   8  -2 -12  552.72   32.69
   8  -2 -12  612.14   35.20
  -9   1  12 1390.48   64.30
  -9   1  12 1419.17   57.55
  -9   1  12 1371.80   64.69
   9  -1 -12 1290.33   62.61
   9  -1 -12 1456.97   65.95
   9  -1 -12 1382.50   56.73
 -10   0  12    1.62    4.38
 -10   0  12    0.15    2.03
  10   0 -12    0.35    2.31
  10   0 -12   -3.34    2.64
  10   0 -12   -1.23    3.85
 -11  -1  12 1232.16   53.29
 -11  -1  12 1212.46   59.00
  11   1 -12 1185.69   52.78
  11   1 -12 1216.74   60.57
 -12  -2  12    2.94    3.14
 -12  -2  12    0.31    3.69
  12   2 -12   -2.38    2.21
  12   2 -12    0.86    5.04
 -13  -3  12   83.36   12.32
 -13  -3  12  106.36   11.42
  13   3 -12  107.63   14.76
  13   3 -12   81.34   10.71
 -14  -4  12  145.71   16.88
 -14  -4  12  177.42   15.61
  14   4 -12  203.10   20.70
  14   4 -12  178.89   16.72
 -15  -5  12   90.24   12.19
 -15  -5  12  107.01   14.76
  15   5 -12   91.39   14.71
  15   5 -12   74.50   11.78
 -16  -6  12  428.47   30.93
 -16  -6  12  371.30   26.78
  16   6 -12  420.32   29.33
  16   6 -12  401.68   32.31
 -17  -7  12   14.27    7.67
 -17  -7  12   17.38    7.76
  17   7 -12   26.41    9.19
 -18  -8  12  227.77   21.88
 -18  -8  12  318.32   41.74
  18   8 -12  270.11   25.95
  18   8 -12  286.39   27.83
 -19  -9  12  402.99   33.42
 -19  -9  12  430.57   31.96
  19   9 -12  396.89   33.82
  19   9 -12  367.04   30.84
 -20 -10  12    4.63    6.32
 -20 -10  12    7.48    7.99
  20  10 -12    6.27    7.28
  20  10 -12    7.52    8.48
 -21 -11  12   13.70    8.87
 -21 -11  12   47.26   13.29
  21  11 -12   38.26   14.11
 -22 -12  12    3.74    8.38
 -22 -12  12    1.53    6.72
  22  12 -12    0.75    7.49
 -23 -13  12  144.29   22.32
 -23 -13  12  168.78   22.60
  23  13 -12  169.57   24.52
 -24 -14  12   85.10   19.17
 -24 -14  12   91.88   20.60
  24  14 -12  119.47   24.40
 -25 -15  12  272.64   30.65
 -25 -15  12  285.18   32.64
  25  15 -12  232.73   30.15
 -26 -16  12  141.28   23.02
 -26 -16  12  132.95   26.51
  26  16 -12  196.50   28.34
 -27 -17  12   98.94   22.08
  27  17 -12  153.88   29.17
 -28 -18  12    6.14    9.85
 -28 -18  12    9.07   11.44
  28  18 -12   -4.61    7.99
 -29 -19  12  314.79   36.70
 -29 -19  12  257.02   34.65
  29  19 -12  268.70   34.71
 -30 -20  12   -5.97    7.99
  19  30  13   41.46   17.43
  18  29  13   17.46   13.67
 -18 -29 -13    2.49   11.30
  17  28  13  176.82   28.17
  16  27  13   -2.91    6.73
 -16 -27 -13    7.77   11.31
  15  26  13    3.49   13.00
 -15 -26 -13    0.45    8.52
  14  25  13  111.00   23.11
 -14 -25 -13   48.09   17.01
  13  24  13   20.16   11.12
 -13 -24 -13    5.09    8.77
  12  23  13  188.48   25.20
  12  23  13  166.34   10.51
  12  23  13  170.99   10.67
 -12 -23 -13  254.53   30.01
  11  22  13    2.23    7.34
  11  22  13    8.79    3.41
  11  22  13    3.15    2.75
 -11 -22 -13   -4.00    6.75
  10  21  13  388.00   33.77
  10  21  13  332.73   18.08
  10  21  13  324.30   17.98
 -10 -21 -13  342.97   32.74
   9  20  13  124.95    9.97
   9  20  13   99.48   19.16
   9  20  13  123.25    9.89
  -9 -20 -13  115.79   18.53
   8  19  13  129.41   10.58
   8  19  13  174.50   21.30
   8  19  13  127.20   10.47
  -8 -19 -13  145.65   20.25
   7  18  13  493.80   37.82
   7  18  13  525.03   25.76
   7  18  13  538.90   38.10
   7  18  13  472.34   25.04
  -7 -18 -13  562.99   40.03
   6  17  13  190.86   13.46
   6  17  13  168.33   12.78
   6  17  13  204.32   21.59
   6  17  13  160.28   20.31
  -6 -17 -13  189.33   21.18
   5  16  13  133.74   11.54
   5  16  13  152.69   18.54
   5  16  13  134.37   17.70
   5  16  13  151.90   11.74
  -5 -16 -13  157.86   18.75
   4  15  13  144.40   11.58
   4  15  13  135.43   17.44
   4  15  13  129.84   11.94
   4  15  13  151.31   17.99
  -4 -15 -13  147.85   17.43
   3  14  13    9.01    3.85
   3  14  13    5.70    5.94
   3  14  13    1.42    4.17
  -3 -14 -13    3.68    5.19
   2  13  13  885.43   48.47
   2  13  13  952.75   42.93
   2  13  13  971.95   51.08
  -2 -13 -13  878.75   45.45
  -2 -13 -13  939.06   48.00
  -2 -13 -13  901.00   42.17
   1  12  13   32.55    6.71
   1  12  13   23.77    8.08
  -1 -12 -13   38.81    7.94
  -1 -12 -13   34.24    7.99
  -1 -12 -13   38.24    8.99
   0  11  13 2015.63   89.92
   0  11  13 2048.81   83.59
   0 -11 -13 1935.77   81.62
   0 -11 -13 2087.99   84.88
   0 -11 -13 1896.39   81.99
  -1  10  13    4.99    4.80
  -1  10  13   13.42    5.11
   1 -10 -13    7.19    4.38
   1 -10 -13    8.01    4.70
   1 -10 -13    4.83    4.01
  -2   9  13  350.07   25.33
  -2   9  13  369.69   22.49
   2  -9 -13  367.47   21.83
   2  -9 -13  325.73   21.98
   2  -9 -13  352.08   20.36
  -3   8  13   15.65    6.30
  -3   8  13   13.56    5.33
   3  -8 -13   19.12    5.49
   3  -8 -13   13.82    5.44
   3  -8 -13   17.05    4.51
  -4   7  13   85.14   11.77
   4  -7 -13   99.58   11.63
   4  -7 -13   87.63    8.11
   4  -7 -13   99.76    9.35
  -5   6  13   17.14    5.71
  -5   6  13   29.17    8.14
   5  -6 -13   26.43    5.20
   5  -6 -13   28.91    7.24
   5  -6 -13   36.89    8.25
   5  -6 -13   22.92    4.34
  -6   5  13   20.27    4.11
  -6   5  13   35.99    8.58
  -6   5  13   21.61    7.66
   6  -5 -13   22.74    7.28
   6  -5 -13   27.23    4.26
   6  -5 -13   21.51    6.84
  -7   4  13  107.33   12.48
  -7   4  13   89.72    7.54
  -7   4  13   89.78   11.78
   7  -4 -13   82.16    6.99
   7  -4 -13   84.45   11.78
   7  -4 -13   69.39   10.45
  -8   3  13   21.80    7.29
  -8   3  13   11.55    5.90
  -8   3  13   20.10    4.09
   8  -3 -13   17.47    7.28
   8  -3 -13    7.83    5.73
   8  -3 -13   19.86    4.13
  -9   2  13  345.57   18.65
  -9   2  13  359.19   25.21
   9  -2 -13  346.09   18.51
   9  -2 -13  333.43   25.43
 -10   1  13    6.51    3.33
 -10   1  13    1.27    3.99
  10  -1 -13    5.05    3.20
  10  -1 -13   10.82    6.37
 -11   0  13 1988.78   90.41
 -11   0  13 2119.96   83.39
  11   0 -13 2053.96   91.76
  11   0 -13 2001.94   82.09
 -12  -1  13   44.29    6.88
 -12  -1  13    8.87    5.99
  12   1 -13   32.92    7.21
  12   1 -13   52.35   12.40
 -13  -2  13  986.63   46.72
 -13  -2  13 1035.04   53.07
  13   2 -13 1032.07   54.75
  13   2 -13  927.99   46.06
 -14  -3  13   19.58    6.03
 -14  -3  13   13.23    7.15
  14   3 -13    3.65    4.46
  14   3 -13   10.65    6.74
 -15  -4  13  147.13   14.59
 -15  -4  13  138.08   16.99
  15   4 -13  104.90   16.55
  15   4 -13  156.32   15.69
 -16  -5  13  135.84   17.31
  16   5 -13  155.11   16.71
  16   5 -13  139.31   18.76
 -17  -6  13  179.82   20.50
 -17  -6  13  193.07   18.60
  17   6 -13  196.30   19.79
  17   6 -13  209.18   23.78
 -18  -7  13  516.05   34.28
 -18  -7  13  518.38   37.37
  18   7 -13  508.18   39.44
  18   7 -13  552.93   36.74
 -19  -8  13  166.57   20.99
 -19  -8  13  133.45   17.25
  19   8 -13  174.89   22.57
  19   8 -13  120.41   17.25
 -20  -9  13  120.77   16.98
 -20  -9  13  118.32   18.73
  20   9 -13   87.47   17.61
  20   9 -13  135.90   20.97
 -21 -10  13  286.76   27.14
 -21 -10  13  331.08   30.82
  21  10 -13  363.21   34.23
 -22 -11  13    7.90    8.29
 -22 -11  13    4.49    7.17
  22  11 -13   15.95    9.60
 -23 -12  13  179.02   22.89
 -23 -12  13  203.75   25.85
  23  12 -13  178.82   26.01
 -24 -13  13   -0.24    6.91
 -24 -13  13    0.41    6.97
  24  13 -13   -0.64    8.53
 -25 -14  13   63.12   18.20
 -25 -14  13   67.63   17.19
  25  14 -13   51.89   17.77
 -26 -15  13    1.57    8.19
 -26 -15  13    7.87   10.14
  26  15 -13    7.01   10.38
 -27 -16  13    5.84   12.40
 -27 -16  13    7.64    9.61
  27  16 -13   -4.16    8.58
 -28 -17  13  148.03   28.37
 -28 -17  13  157.79   30.40
  28  17 -13  162.59   30.37
 -29 -18  13   -7.72    8.53
 -29 -18  13    8.95   16.73
  29  18 -13   -0.17    9.18
 -30 -19  13   20.78   14.69
 -30 -19  13   32.17   16.26
  30  19 -13    3.41   11.63
  18  30  14   67.65   22.48
 -18 -30 -14   65.40   31.42
  17  29  14  102.04   24.71
 -17 -29 -14   49.05   19.73
  16  28  14   48.32   17.01
 -16 -28 -14   28.53   15.34
  15  27  14   32.66   14.60
 -15 -27 -14    1.79    8.93
  14  26  14    6.43   16.00
 -14 -26 -14   -1.56    8.17
  13  25  14   43.82   15.74
 -13 -25 -14   43.20   16.87
  12  24  14  144.21   22.94
 -12 -24 -14   98.57   22.20
  11  23  14    9.84    9.20
  11  23  14    2.87    2.49
  11  23  14    1.52    2.26
 -11 -23 -14   -2.91    6.55
  10  22  14  121.39    9.33
  10  22  14  122.93    9.32
  10  22  14  147.25   21.59
 -10 -22 -14  139.25   21.79
   9  21  14   22.43    4.88
   9  21  14   41.19   13.16
   9  21  14   25.36    5.24
  -9 -21 -14   31.17   12.44
   8  20  14  170.85   12.33
   8  20  14  172.69   12.38
   8  20  14  167.04   21.72
  -8 -20 -14  190.16   23.45
   7  19  14   63.56    7.56
   7  19  14   66.64    7.75
   7  19  14   42.67   12.53
   7  19  14   46.93   13.85
  -7 -19 -14   48.28   13.86
   6  18  14  242.76   15.90
   6  18  14  236.84   25.13
   6  18  14  267.35   25.65
   6  18  14  246.40   17.04
  -6 -18 -14  192.19   21.91
   5  17  14  122.65   10.87
   5  17  14  109.63   23.59
   5  17  14  119.25   17.21
  -5 -17 -14  114.27   16.71
   4  16  14  308.95   26.35
   4  16  14  247.80   29.36
   4  16  14  288.13   18.69
   4  16  14  296.47   18.39
  -4 -16 -14  248.46   23.34
   3  15  14    1.12    5.59
   3  15  14   11.07    4.71
   3  15  14    2.61    5.49
   3  15  14    2.66    2.86
  -3 -15 -14   -2.38    4.32
   2  14  14   -0.93    2.31
   2  14  14    1.97    3.12
   2  14  14    2.47    5.46
  -2 -14 -14    2.62    4.03
  -2 -14 -14    6.19    4.76
   1  13  14   14.56    7.07
   1  13  14   11.67    4.65
  -1 -13 -14    9.28    5.53
  -1 -13 -14   16.06    5.37
  -1 -13 -14    4.53    4.09
   0  12  14   58.37   11.82
   0  12  14   53.13    8.10
   0 -12 -14   52.06    9.10
   0 -12 -14   59.66   10.40
   0 -12 -14   61.80   11.60
  -1  11  14   11.97    4.99
  -1  11  14    7.57    5.31
   1 -11 -14   17.50    5.82
   1 -11 -14   13.25    5.06
   1 -11 -14   21.52    6.79
  -2  10  14  140.82   12.97
  -2  10  14  111.65   14.28
   2 -10 -14  116.20   11.76
   2 -10 -14  117.21   10.98
   2 -10 -14  120.13   12.62
  -3   9  14  270.79   20.23
  -3   9  14  307.50   23.34
   3  -9 -14  269.91   18.22
   3  -9 -14  299.53   21.00
   3  -9 -14  278.17   17.24
  -4   8  14   74.37   10.12
  -4   8  14   59.28   11.60
   4  -8 -14   60.63    9.55
   4  -8 -14   46.74    6.32
   4  -8 -14   64.60    7.68
  -5   7  14  234.75   20.09
  -5   7  14  225.53   18.23
   5  -7 -14  236.58   13.84
   5  -7 -14  216.33   18.44
   5  -7 -14  212.90   14.46
  -6   6  14   -2.36    2.82
  -6   6  14   -2.39    3.42
   6  -6 -14    1.16    2.08
   6  -6 -14   -0.10    3.48
   6  -6 -14    1.42    2.33
  -7   5  14  285.01   21.71
  -7   5  14  224.20   19.14
  -7   5  14  234.47   13.83
   7  -5 -14  241.51   13.39
   7  -5 -14  209.00   19.25
  -8   4  14   57.92   10.87
  -8   4  14   53.93    5.91
   8  -4 -14   59.18    6.13
   8  -4 -14   52.85   10.63
  -9   3  14  283.45   22.81
  -9   3  14  295.95   16.33
   9  -3 -14  259.87   15.46
   9  -3 -14  329.91   24.56
 -10   2  14  107.63    9.26
 -10   2  14  132.46   15.05
  10  -2 -14  101.09    8.95
  10  -2 -14  112.79   14.76
 -11   1  14   10.27    4.24
 -11   1  14   13.81    6.29
  11  -1 -14   18.86    8.22
  11  -1 -14   10.37    3.87
 -12   0  14   60.26   12.04
 -12   0  14   43.09    6.76
  12   0 -14   52.14    7.63
  12   0 -14   52.22   12.30
 -13  -1  14   12.99    4.91
 -13  -1  14   10.16    6.63
  13   1 -14   18.65    5.71
  13   1 -14    9.53    6.64
 -14  -2  14   -0.25    4.42
 -14  -2  14   -0.34    2.80
  14   2 -14    0.28    3.36
  14   2 -14    6.55    5.72
 -15  -3  14   -2.89    4.46
 -15  -3  14    3.02    3.59
  15   3 -14    0.66    5.36
  15   3 -14   -1.70    3.20
 -16  -4  14  303.27   26.55
 -16  -4  14  319.35   22.86
  16   4 -14  290.22   22.70
  16   4 -14  250.39   31.40
 -17  -5  14  133.74   14.85
 -17  -5  14  106.22   20.69
  17   5 -14  130.66   18.85
  17   5 -14  139.37   16.31
 -18  -6  14  244.92   24.48
 -18  -6  14  202.06   19.89
  18   6 -14  222.17   21.81
  18   6 -14  244.49   26.27
 -19  -7  14   44.76   11.70
 -19  -7  14   69.08   15.64
  19   7 -14   52.70   15.76
  19   7 -14   77.21   17.89
 -20  -8  14  181.64   20.26
 -20  -8  14  172.30   22.13
  20   8 -14  212.21   23.20
  20   8 -14  233.11   26.72
 -21  -9  14   28.08   10.58
 -21  -9  14   19.93   10.46
  21   9 -14   42.44   13.06
  21   9 -14   24.48   11.99
 -22 -10  14  135.49   19.06
 -22 -10  14  125.18   22.80
  22  10 -14  172.37   25.11
 -23 -11  14   -6.37    4.88
 -23 -11  14   13.00    9.51
  23  11 -14   -8.02    5.65
 -24 -12  14  105.98   21.77
 -24 -12  14   70.97   17.76
  24  12 -14  105.62   23.66
 -25 -13  14   22.11   11.52
 -25 -13  14   37.04   15.32
  25  13 -14   32.33   14.18
 -26 -14  14   -2.27    7.68
 -26 -14  14   -2.03    8.05
  26  14 -14    2.42   10.14
 -27 -15  14   29.08   13.72
 -27 -15  14   37.13   18.22
  27  15 -14   33.40   17.15
 -28 -16  14   28.18   13.72
 -28 -16  14   45.50   17.27
  28  16 -14   44.51   17.37
 -29 -17  14   96.78   24.69
 -29 -17  14   75.62   21.04
  29  17 -14  105.44   25.46
 -30 -18  14   45.30   17.10
 -30 -18  14   40.10   17.21
  30  18 -14   83.46   23.86
  17  30  15   10.30   11.14
 -17 -30 -15   22.78   15.06
  16  29  15   13.28   13.41
 -16 -29 -15   -1.29   10.42
  15  28  15   -6.24    5.74
 -15 -28 -15    7.39   11.33
  14  27  15   25.41   14.30
 -14 -27 -15   12.74   12.52
 -13 -26 -15   -5.24    6.69
  12  25  15  196.58   27.14
 -12 -25 -15  229.41   29.96
  11  24  15   20.43   11.99
 -11 -24 -15   32.41   13.80
  10  23  15  133.36    9.14
  10  23  15  141.57    9.21
  10  23  15  144.84   21.91
 -10 -23 -15  145.69   23.11
   9  22  15  271.19   15.38
   9  22  15  258.42   15.31
   9  22  15  280.77   29.66
  -9 -22 -15  274.74   29.43
   8  21  15  344.80   18.99
   8  21  15  321.72   18.70
   8  21  15  391.89   33.79
  -8 -21 -15  357.04   33.10
   7  20  15   26.45   11.67
  -7 -20 -15    0.99    5.93
   6  19  15  220.33   15.15
   6  19  15  213.33   24.47
   6  19  15  242.95   25.85
  -6 -19 -15  244.70   25.26
   5  18  15   66.97    8.63
   5  18  15   78.18   17.40
   5  18  15   80.96   16.48
   5  18  15   66.33    8.31
  -5 -18 -15   68.72   15.70
   4  17  15   11.72    7.64
   4  17  15    8.30    4.26
   4  17  15   20.80    9.16
   4  17  15    1.42    3.24
  -4 -17 -15   15.44    7.58
   3  16  15   54.24   13.16
   3  16  15   41.92    8.32
   3  16  15   61.89   13.52
   3  16  15   49.85    7.69
  -3 -16 -15   25.41    9.52
  -3 -16 -15   66.91   12.91
   2  15  15  652.17   48.36
   2  15  15  679.41   34.77
   2  15  15  716.64   36.09
  -2 -15 -15  677.61   40.22
  -2 -15 -15  667.73   38.44
   1  14  15  326.75   26.32
   1  14  15  282.44   19.64
  -1 -14 -15  268.03   19.19
  -1 -14 -15  294.38   21.62
  -1 -14 -15  256.62   21.86
   0  13  15  496.08   28.40
   0  13  15  513.65   34.68
   0 -13 -15  500.43   30.81
   0 -13 -15  497.89   29.26
   0 -13 -15  482.13   28.56
  -1  12  15  170.34   18.36
   1 -12 -15  156.61   14.12
   1 -12 -15  169.15   15.13
   1 -12 -15  155.15   15.02
  -2  11  15   26.50    7.06
  -2  11  15   30.65    9.42
[truncated: 5,094,235 more chars]
