# Supplementary material for: Water-Soluble Polyoxometal Clusters of Molybdenum (V) with Pyrazole and Triazole: Synthesis and Study of Cytotoxicity and Antiviral Activity
Source: Molecules. 2023 Dec 14;28(24):8079. doi: 10.3390/molecules28248079 (PMC10745505; doi:10.3390/molecules28248079)
Supplement: Supplementary file 1 [file molecules-28-08079-s001.zip › Compound 3.cif]

data_jul167-3
_publ_requested_journal          'Dalton Trans.'
_publ_contact_author_name        'Dr. Natalia V. Kuratieva'
_publ_contact_author_address     
;Nikolaev Institute of Inorganic Chemistry,
SB Russian Academy of Sciences,
Akad. Lavrentiev prospekt 3,
Novosibirsk,
630090 Russia
;


_publ_contact_author_email       kuratieva@gmail.com
_publ_contact_author_phone       7(383)3309466
_publ_contact_author_fax         7(383)3309489
loop_
_publ_author_name
_publ_author_address
'Konkova, Anna V.'
;Nikolaev Institute of Inorganic Chemistry,
SB Russian Academy of Sciences,
Akad. Lavrentiev prospekt 3,
Novosibirsk,
630090 Russia
;
'Savina, Iulia V.'
;Nikolaev Institute of Inorganic Chemistry,
SB Russian Academy of Sciences,
Akad. Lavrentiev prospekt 3,
Novosibirsk,
630090 Russia
;
'Evtushok, Darya V.'
;Nikolaev Institute of Inorganic Chemistry,
SB Russian Academy of Sciences,
Akad. Lavrentiev prospekt 3,
Novosibirsk,
630090 Russia
;
'Pozmogova, Tatiana N.'
;Nikolaev Institute of Inorganic Chemistry,
SB Russian Academy of Sciences,
Akad. Lavrentiev prospekt 3,
Novosibirsk,
630090 Russia
;
'Solomatina, Maria V.'
;Research Institute of Virology, 
Federal Research Center of Fundamental and Translational Medicine, 
2 Timakova St, Novosibirsk 
630117 Russia
;
'Nohova, Alina R.'
;Research Institute of Virology, 
Federal Research Center of Fundamental and Translational Medicine, 
2 Timakova St, Novosibirsk 
630117 Russia
;
'Alekseev, Alexander Y.'
;Research Institute of Virology, 
Federal Research Center of Fundamental and Translational Medicine, 
2 Timakova St, Novosibirsk 
630117 Russia
;
'Kuratieva, Natalia V.'
;Nikolaev Institute of Inorganic Chemistry,
SB Russian Academy of Sciences,
Akad. Lavrentiev prospekt 3,
Novosibirsk,
630090 Russia
;
'Eltsov, Ilia V.'
;Novosibirsk State University, 
2 Pirogov Str., 
Novosibirsk, 
630090 Russia
;
'Yanshole, Vadim V.'
;International Tomography Center SB RAS, 
3a Institutskaya Str., 
Novosibirsk, 
630090 Russia
;
'Shestopalov, Alexander M.'
;Research Institute of Virology, 
Federal Research Center of Fundamental and Translational Medicine, 
2 Timakova St, Novosibirsk 
630117 Russia
;
'Ivanov, Anton A.'
;Nikolaev Institute of Inorganic Chemistry,
SB Russian Academy of Sciences,
Akad. Lavrentiev prospekt 3,
Novosibirsk,
630090 Russia
;
'Shestopalov, Michael A.'
;Nikolaev Institute of Inorganic Chemistry,
SB Russian Academy of Sciences,
Akad. Lavrentiev prospekt 3,
Novosibirsk,
630090 Russia
;

_audit_creation_method           SHELXL-2014/7
_shelx_SHELXL_version_number     2014/7
_chemical_name_systematic        ?
_chemical_name_common            ?
_chemical_formula_moiety         'C16 H16 Mo12 N24 O28, 4(H2 O), 4(N H4)'
_chemical_formula_sum            'C16 H40 Mo12 N28 O32'
_chemical_melting_point          ?

_exptl_crystal_description       prism
_exptl_crystal_colour            orange
_diffrn_ambient_temperature      150(2)
_chemical_formula_weight         2288.04

loop_
_atom_type_symbol
_atom_type_description
_atom_type_scat_dispersion_real
_atom_type_scat_dispersion_imag
_atom_type_scat_source
C C 0.0033 0.0016 'International Tables Vol C Tables 4.2.6.8 and 6.1.1.4'
H H 0.0000 0.0000 'International Tables Vol C Tables 4.2.6.8 and 6.1.1.4'
Mo Mo -1.6832 0.6857 'International Tables Vol C Tables 4.2.6.8 and 6.1.1.4'
N N 0.0061 0.0033 'International Tables Vol C Tables 4.2.6.8 and 6.1.1.4'
O O 0.0106 0.0060 'International Tables Vol C Tables 4.2.6.8 and 6.1.1.4'

_space_group_crystal_system      monoclinic
_space_group_IT_number           14
_space_group_name_H-M_alt        'P 21/n'
_space_group_name_Hall           '-P 2yn'

_shelx_space_group_comment       
;
The symmetry employed for this shelxl refinement is uniquely defined
by the following loop, which should always be used as a source of
symmetry information in preference to the above space-group names.
They are only intended as comments.
;

loop_
_space_group_symop_operation_xyz
'x, y, z'
'-x+1/2, y+1/2, -z+1/2'
'-x, -y, -z'
'x-1/2, -y-1/2, z-1/2'

_cell_length_a                   11.7496(4)
_cell_length_b                   21.5118(7)
_cell_length_c                   22.6938(7)
_cell_angle_alpha                90
_cell_angle_beta                 102.1740(10)
_cell_angle_gamma                90
_cell_volume                     5607.0(3)
_cell_formula_units_Z            4
_cell_measurement_temperature    150(2)
_cell_measurement_reflns_used      9992
_cell_measurement_theta_min        2.36
_cell_measurement_theta_max       33.14
_exptl_crystal_density_meas      ?
_exptl_crystal_density_method    ?
_exptl_crystal_density_diffrn    2.710
_exptl_crystal_F_000             4368
_exptl_transmission_factor_min   0.612
_exptl_transmission_factor_max   0.747
_exptl_crystal_size_max          0.10
_exptl_crystal_size_mid          0.08
_exptl_crystal_size_min          0.08
_exptl_absorpt_coefficient_mu    2.696
_shelx_estimated_absorpt_T_min   0.749
_shelx_estimated_absorpt_T_max   0.809

_exptl_absorpt_correction_type   multi-scan
_exptl_absorpt_correction_T_min  ?
_exptl_absorpt_correction_T_max  ?
_exptl_absorpt_process_details   'Bruker SADABS-2012/1'
_exptl_absorpt_special_details   ?


_diffrn_radiation_probe          x-ray
_diffrn_radiation_type           MoK\a
_diffrn_radiation_wavelength     0.71073
_diffrn_source                   ?
_diffrn_source_type              'Incoatec ImS 3.0'
_diffrn_measurement_device_type  'Bruker D8 VENTURE'
_diffrn_measurement_method       '\f and \w scans'
_diffrn_detector_area_resol_mean 7.4
_diffrn_reflns_number            74359
_diffrn_reflns_av_unetI/netI     0.0535
_diffrn_reflns_av_R_equivalents  0.0520
_diffrn_reflns_limit_h_min       -18
_diffrn_reflns_limit_h_max       18
_diffrn_reflns_limit_k_min       -33
_diffrn_reflns_limit_k_max       33
_diffrn_reflns_limit_l_min       -28
_diffrn_reflns_limit_l_max       34
_diffrn_reflns_theta_min         1.893
_diffrn_reflns_theta_max         33.158
_diffrn_reflns_theta_full        25.250
_diffrn_measured_fraction_theta_max 0.998
_diffrn_measured_fraction_theta_full 0.998
_diffrn_reflns_Laue_measured_fraction_max 0.998
_diffrn_reflns_Laue_measured_fraction_full 0.998
_diffrn_reflns_point_group_measured_fraction_max 0.998
_diffrn_reflns_point_group_measured_fraction_full 0.998
_reflns_number_total             21345
_reflns_number_gt                16050
_reflns_threshold_expression     >2\s(I)
_reflns_Friedel_coverage         0.000
_reflns_Friedel_fraction_max     .
_reflns_Friedel_fraction_full    .

_reflns_special_details          
;
 Reflections were merged by SHELXL according to the crystal
 class for the calculation of statistics and refinement.
 
 _reflns_Friedel_fraction is defined as the number of unique
 Friedel pairs measured divided by the number that would be
 possible theoretically, ignoring centric projections and
 systematic absences.
;


_computing_data_collection       'Bruker APEX3 V2018.7-2'
_computing_cell_refinement       'SAINT V8.38A'
_computing_data_reduction        'SAINT V8.38A'
_computing_structure_solution    'Bruker SHELXTL'
_computing_structure_refinement  'Bruker SHELXTL'
_computing_molecular_graphics    'Bruker SHELXTL'
_computing_publication_material  'Bruker SHELXTL'
_refine_special_details          ?
_refine_ls_structure_factor_coef Fsqd
_refine_ls_matrix_type           full
_refine_ls_weighting_scheme      calc
_refine_ls_weighting_details     
'w=1/[\s^2^(Fo^2^)+(0.0379P)^2^] where P=(Fo^2^+2Fc^2^)/3'
_atom_sites_solution_primary     ?
_atom_sites_solution_secondary   ?
_atom_sites_solution_hydrogens   geom
_refine_ls_hydrogen_treatment    constr
_refine_ls_extinction_method     none
_refine_ls_extinction_coef       .
_refine_ls_number_reflns         21345
_refine_ls_number_parameters     832
_refine_ls_number_restraints     30
_refine_ls_R_factor_all          0.0606
_refine_ls_R_factor_gt           0.0385
_refine_ls_wR_factor_ref         0.0914
_refine_ls_wR_factor_gt          0.0850
_refine_ls_goodness_of_fit_ref   1.063
_refine_ls_restrained_S_all      1.068
_refine_ls_shift/su_max          0.002
_refine_ls_shift/su_mean         0.000

loop_
_atom_site_label
_atom_site_type_symbol
_atom_site_fract_x
_atom_site_fract_y
_atom_site_fract_z
_atom_site_U_iso_or_equiv
_atom_site_adp_type
_atom_site_occupancy
_atom_site_site_symmetry_order
_atom_site_calc_flag
_atom_site_refinement_flags_posn
_atom_site_refinement_flags_adp
_atom_site_refinement_flags_occupancy
_atom_site_disorder_assembly
_atom_site_disorder_group
Mo1 Mo 0.24056(3) 0.07475(2) 0.58444(2) 0.01680(6) Uani 1 1 d . . . . .
Mo2 Mo 0.41917(3) 0.13039(2) 0.55694(2) 0.01731(6) Uani 1 1 d . . . . .
Mo3 Mo 0.36445(3) 0.22608(2) 0.66027(2) 0.01916(6) Uani 1 1 d . . . . .
Mo4 Mo 0.45373(3) -0.00602(2) 0.66597(2) 0.01647(6) Uani 1 1 d . . . . .
Mo5 Mo 0.65007(3) 0.15051(2) 0.69292(2) 0.01644(6) Uani 1 1 d . . . . .
Mo6 Mo 0.26307(3) 0.07788(2) 0.74827(2) 0.01776(6) Uani 1 1 d . . . . .
Mo7 Mo 0.43377(3) 0.23211(2) 0.77615(2) 0.01878(6) Uani 1 1 d . . . . .
Mo8 Mo 0.57722(3) 0.00245(2) 0.77425(2) 0.01730(6) Uani 1 1 d . . . . .
Mo9 Mo 0.74606(3) 0.14621(2) 0.80640(2) 0.01858(6) Uani 1 1 d . . . . .
Mo10 Mo 0.35554(3) 0.09935(2) 0.85961(2) 0.02079(6) Uani 1 1 d . . . . .
Mo11 Mo 0.57793(3) 0.18114(2) 0.93011(2) 0.02102(7) Uani 1 1 d . . . . .
Mo12 Mo 0.68049(3) 0.07512(2) 0.92275(2) 0.02094(6) Uani 1 1 d . . . . .
O1 O 0.1468(2) 0.06621(12) 0.51689(10) 0.0230(5) Uani 1 1 d . . . . .
N1N N 0.2371(4) 0.3874(2) 0.7294(2) 0.0504(11) Uani 1 1 d . . . . .
O2 O 0.3929(2) 0.12588(13) 0.48090(11) 0.0245(5) Uani 1 1 d . . . . .
N2N N 0.2888(5) 0.4134(2) 0.6234(2) 0.0702(15) Uani 1 1 d . U . . .
O3 O 0.2406(3) 0.26787(13) 0.64879(12) 0.0318(6) Uani 1 1 d . . . . .
N3N N 0.5769(3) 0.5086(2) 0.77932(17) 0.0415(9) Uani 1 1 d . . . . .
O4 O 0.5377(2) -0.05094(12) 0.63114(11) 0.0250(6) Uani 1 1 d . . . . .
O1WA O 0.4999(6) 0.4091(2) 0.7038(3) 0.0652(17) Uani 0.75 1 d . . P A 2
O1WB O 0.5626(19) 0.3947(7) 0.6981(9) 0.0652(17) Uani 0.25 1 d . . P B 1
O5 O 0.7186(2) 0.21264(12) 0.67110(12) 0.0259(6) Uani 1 1 d . . . . .
N4NA N 0.0738(10) 0.2215(6) 0.8164(5) 0.068(4) Uani 0.5 1 d . . P C 1
N4NB N 0.1023(10) 0.2563(4) 0.8134(6) 0.049(3) Uani 0.5 1 d . . P D 2
O6 O 0.1779(2) 0.01548(13) 0.75447(11) 0.0264(6) Uani 1 1 d . . . . .
O2WA O 0.0056(10) 0.3136(6) 0.8800(6) 0.085(3) Uani 0.5 1 d . . P E 1
O2WB O -0.0748(10) 0.3194(6) 0.8657(6) 0.085(3) Uani 0.5 1 d . . P F 2
O7 O 0.3261(3) 0.27686(13) 0.79250(12) 0.0319(7) Uani 1 1 d . . . . .
O3WA O 1.0106(10) 0.3042(4) 0.7070(5) 0.085(2) Uani 0.5 1 d . . P G 1
O3WB O 0.9423(10) 0.3192(4) 0.7341(5) 0.085(2) Uani 0.5 1 d . . P H 2
O8 O 0.6937(2) -0.04099(12) 0.76755(11) 0.0271(6) Uani 1 1 d . . . . .
O4WA O 0.7817(14) 0.3244(6) 0.7486(6) 0.038(3) Uani 0.25 1 d . U P I 1
O4WB O 0.7206(14) 0.3327(7) 0.7172(8) 0.050(4) Uani 0.25 1 d . . P J 2
O4WC O 0.6979(16) 0.3453(9) 0.6653(10) 0.082(4) Uani 0.25 1 d . U P K 3
O4WD O 0.6672(15) 0.4017(8) 0.5519(9) 0.082(4) Uani 0.25 1 d . . P . .
O9 O 0.8368(3) 0.20825(14) 0.81495(12) 0.0319(6) Uani 1 1 d . . . . .
O10 O 0.3030(2) 0.04080(13) 0.89601(11) 0.0291(6) Uani 1 1 d . . . . .
O11 O 0.6349(2) 0.20365(14) 1.00148(11) 0.0308(6) Uani 1 1 d . . . . .
O12 O 0.7477(2) 0.06143(13) 0.99515(11) 0.0298(6) Uani 1 1 d . . . . .
O13 O 0.2846(2) 0.16312(11) 0.58680(10) 0.0187(5) Uani 1 1 d . . . . .
O14 O 0.3981(2) 0.04419(11) 0.58168(10) 0.0172(5) Uani 1 1 d . . . . .
O15 O 0.4927(2) 0.16365(11) 0.64093(10) 0.0169(5) Uani 1 1 d . . . . .
O16 O 0.3134(2) 0.05498(11) 0.67270(10) 0.0167(5) Uani 1 1 d . . . . .
O17 O 0.3481(2) 0.16742(11) 0.72520(10) 0.0184(5) Uani 1 1 d . . . . .
O18 O 0.5576(2) 0.06035(10) 0.70634(10) 0.0164(4) Uani 1 1 d . . . . .
O19 O 0.5951(2) 0.17984(11) 0.76387(10) 0.0183(5) Uani 1 1 d . . . . .
O20 O 0.4172(2) 0.05694(11) 0.79575(10) 0.0183(5) Uani 1 1 d . . . . .
O21 O 0.4604(2) 0.17649(11) 0.84757(10) 0.0192(5) Uani 1 1 d . . . . .
O22 O 0.6516(2) 0.06818(11) 0.83003(10) 0.0175(5) Uani 1 1 d . . . . .
O23 O 0.7140(2) 0.16011(12) 0.89634(10) 0.0212(5) Uani 1 1 d . . . . .
O24 O 0.5187(2) 0.09513(12) 0.92737(10) 0.0218(5) Uani 1 1 d . . . . .
O25 O 0.4784(2) 0.27872(11) 0.71011(11) 0.0260(6) Uani 1 1 d . . . . .
O26 O 0.2221(2) 0.13531(12) 0.80679(11) 0.0236(5) Uani 1 1 d . . . . .
O27 O 0.4459(2) -0.05050(11) 0.73832(10) 0.0220(5) Uani 1 1 d . . . . .
O28 O 0.7788(2) 0.10161(12) 0.73893(10) 0.0205(5) Uani 1 1 d . . . . .
N11 N 0.2052(3) -0.02605(14) 0.59464(12) 0.0196(6) Uani 1 1 d . . . . .
N12 N 0.2953(3) -0.05812(14) 0.62554(13) 0.0223(6) Uani 1 1 d . . . . .
N13 N 0.2696(3) -0.11811(15) 0.62840(15) 0.0314(8) Uani 1 1 d . . . . .
N21 N 0.1018(3) 0.10986(15) 0.62455(13) 0.0227(6) Uani 1 1 d . . . . .
N22 N 0.1190(3) 0.12082(14) 0.68400(13) 0.0212(6) Uani 1 1 d . . . . .
N23 N 0.0344(3) 0.15624(16) 0.69556(16) 0.0318(8) Uani 1 1 d . . . . .
N31 N 0.4444(3) 0.23005(14) 0.54147(13) 0.0244(6) Uani 1 1 d . . . . .
N32 N 0.4204(3) 0.26918(14) 0.58324(14) 0.0276(7) Uani 1 1 d . . . . .
N33 N 0.4238(4) 0.32791(18) 0.5652(2) 0.0514(11) Uani 1 1 d . . . . .
N41 N 0.5959(3) 0.09909(14) 0.56228(12) 0.0195(6) Uani 1 1 d . . . . .
N42 N 0.6725(3) 0.09500(14) 0.61535(12) 0.0194(6) Uani 1 1 d . . . . .
N43 N 0.7609(3) 0.05848(15) 0.61069(14) 0.0252(7) Uani 1 1 d . . . . .
N51 N 0.5988(3) 0.27310(14) 0.89603(13) 0.0241(6) Uani 1 1 d . . . . .
N52 N 0.5669(3) 0.28739(15) 0.83685(14) 0.0276(7) Uani 1 1 d . . . . .
N53 N 0.6065(4) 0.34276(16) 0.82669(17) 0.0419(10) Uani 1 1 d . . . . .
N61 N 0.4101(3) 0.20286(15) 0.95276(13) 0.0254(7) Uani 1 1 d . . . . .
N62 N 0.3196(3) 0.16823(16) 0.92578(13) 0.0269(7) Uani 1 1 d . . . . .
N63 N 0.2255(3) 0.1833(2) 0.94604(17) 0.0430(10) Uani 1 1 d . . . . .
N71 N 0.6105(3) -0.01843(15) 0.91255(13) 0.0251(7) Uani 1 1 d . . . . .
N72 N 0.5625(3) -0.04173(15) 0.85847(13) 0.0269(7) Uani 1 1 d . . . . .
N73 N 0.5086(3) -0.09432(17) 0.86445(15) 0.0380(9) Uani 1 1 d . . . . .
N81 N 0.8529(3) 0.05382(16) 0.90373(13) 0.0255(7) Uani 1 1 d . . . . .
N82 N 0.8824(3) 0.08684(16) 0.85885(14) 0.0266(7) Uani 1 1 d . . . . .
C83 C 0.9912(4) 0.0759(2) 0.8578(2) 0.0353(10) Uani 1 1 d . . . . .
H83 H 1.0335 0.0934 0.8305 0.042 Uiso 1 1 calc R U . . .
C14 C 0.1581(4) -0.1238(2) 0.59806(19) 0.0362(10) Uani 1 1 d . . . . .
H14 H 0.1145 -0.1613 0.5924 0.043 Uiso 1 1 calc R U . . .
C15 C 0.1177(3) -0.06553(19) 0.57636(16) 0.0279(8) Uani 1 1 d . . . . .
H15 H 0.0426 -0.0559 0.5531 0.033 Uiso 1 1 calc R U . . .
C24 C -0.0359(4) 0.1684(2) 0.6419(2) 0.0368(10) Uani 1 1 d . . . . .
H24 H -0.1045 0.1930 0.6360 0.044 Uiso 1 1 calc R U . . .
C25 C 0.0063(3) 0.1402(2) 0.59755(18) 0.0322(9) Uani 1 1 d . . . . .
H25A H -0.0259 0.1418 0.5555 0.039 Uiso 1 1 calc R U . . .
C34 C 0.4524(5) 0.3229(3) 0.5089(2) 0.0557(15) Uani 1 1 d . U . . .
H34 H 0.4624 0.3570 0.4839 0.067 Uiso 1 1 calc R U . . .
C35 C 0.4636(4) 0.2632(2) 0.49513(18) 0.0324(9) Uani 1 1 d . U . . .
H35 H 0.4819 0.2474 0.4591 0.039 Uiso 1 1 calc R U . . .
C44 C 0.7398(4) 0.0388(2) 0.55343(17) 0.0318(9) Uani 1 1 d . . . . .
H44 H 0.7885 0.0116 0.5368 0.038 Uiso 1 1 calc R U . . .
C45 C 0.6374(3) 0.06393(18) 0.52261(17) 0.0272(8) Uani 1 1 d . . . . .
H45 H 0.6025 0.0577 0.4813 0.033 Uiso 1 1 calc R U . . .
C54 C 0.6668(5) 0.3631(2) 0.8801(2) 0.0548(15) Uani 1 1 d . . . . .
H54 H 0.7075 0.4015 0.8866 0.066 Uiso 1 1 calc R U . . .
C55 C 0.6607(4) 0.32037(18) 0.92357(19) 0.0341(10) Uani 1 1 d . . . . .
H55 H 0.6941 0.3237 0.9654 0.041 Uiso 1 1 calc R U . . .
C64 C 0.2625(4) 0.2297(2) 0.98826(19) 0.0403(11) Uani 1 1 d . . . . .
H64 H 0.2150 0.2503 1.0112 0.048 Uiso 1 1 calc R U . . .
C65 C 0.3759(3) 0.24078(19) 0.99146(16) 0.0274(8) Uani 1 1 d . . . . .
H65 H 0.4228 0.2703 1.0168 0.033 Uiso 1 1 calc R U . . .
C74 C 0.5216(5) -0.1047(2) 0.9241(2) 0.0476(13) Uani 1 1 d . . . . .
H74 H 0.4912 -0.1391 0.9420 0.057 Uiso 1 1 calc R U . . .
C75 C 0.5860(4) -0.0571(2) 0.95436(18) 0.0387(11) Uani 1 1 d . . . . .
H75 H 0.6088 -0.0524 0.9968 0.046 Uiso 1 1 calc R U . . .
C84 C 1.0327(4) 0.0352(3) 0.9026(2) 0.0472(13) Uani 1 1 d . . . . .
H84 H 1.1097 0.0192 0.9123 0.057 Uiso 1 1 calc R U . . .
N85 N 0.9450(3) 0.02081(19) 0.93174(17) 0.0436(10) Uani 1 1 d . . . . .

loop_
_atom_site_aniso_label
_atom_site_aniso_U_11
_atom_site_aniso_U_22
_atom_site_aniso_U_33
_atom_site_aniso_U_23
_atom_site_aniso_U_13
_atom_site_aniso_U_12
Mo1 0.01805(13) 0.01963(14) 0.01181(12) -0.00107(10) 0.00108(10) 0.00073(11)
Mo2 0.02088(14) 0.01907(14) 0.01204(12) 0.00204(10) 0.00364(10) 0.00248(11)
Mo3 0.02738(16) 0.01349(13) 0.01648(13) 0.00072(10) 0.00437(11) 0.00295(11)
Mo4 0.02069(14) 0.01374(13) 0.01320(13) -0.00094(9) -0.00049(10) -0.00045(11)
Mo5 0.01925(14) 0.01553(13) 0.01488(13) -0.00031(10) 0.00440(10) -0.00173(11)
Mo6 0.01999(14) 0.02112(14) 0.01217(13) -0.00104(10) 0.00339(10) -0.00436(11)
Mo7 0.02433(15) 0.01447(13) 0.01681(13) -0.00311(10) 0.00272(11) 0.00156(11)
Mo8 0.02285(14) 0.01384(13) 0.01301(13) 0.00127(9) -0.00123(10) -0.00136(11)
Mo9 0.01993(14) 0.01902(14) 0.01594(13) -0.00230(10) 0.00187(10) -0.00476(11)
Mo10 0.02375(15) 0.02692(16) 0.01201(13) -0.00213(11) 0.00446(11) -0.00671(12)
Mo11 0.02433(15) 0.02432(16) 0.01352(13) -0.00501(11) 0.00197(11) -0.00369(12)
Mo12 0.02484(15) 0.02342(15) 0.01243(13) 0.00033(10) -0.00088(11) -0.00199(12)
O1 0.0239(13) 0.0265(14) 0.0161(12) -0.0018(9) -0.0018(9) 0.0034(11)
N1N 0.054(3) 0.039(2) 0.058(3) 0.004(2) 0.012(2) 0.021(2)
O2 0.0277(14) 0.0318(15) 0.0147(11) 0.0025(10) 0.0061(10) 0.0043(11)
N2N 0.102(3) 0.056(3) 0.059(3) 0.010(2) 0.034(3) 0.018(3)
O3 0.0443(18) 0.0255(14) 0.0244(14) 0.0002(11) 0.0048(12) 0.0151(13)
N3N 0.0280(19) 0.055(3) 0.039(2) 0.0067(18) 0.0014(16) -0.0095(18)
O4 0.0300(14) 0.0215(13) 0.0220(13) -0.0054(10) 0.0017(10) 0.0051(11)
O1WA 0.104(6) 0.019(2) 0.073(3) 0.003(2) 0.019(4) 0.008(3)
O1WB 0.104(6) 0.019(2) 0.073(3) 0.003(2) 0.019(4) 0.008(3)
O5 0.0283(14) 0.0221(13) 0.0296(14) 0.0034(10) 0.0114(11) -0.0033(11)
N4NA 0.047(7) 0.107(11) 0.049(6) -0.007(8) 0.013(5) 0.036(7)
N4NB 0.039(6) 0.040(5) 0.068(7) 0.009(5) 0.013(5) 0.009(5)
O6 0.0281(14) 0.0285(14) 0.0225(13) 0.0010(10) 0.0047(11) -0.0103(11)
O2WA 0.111(8) 0.062(4) 0.086(6) -0.037(4) 0.034(7) -0.002(7)
O2WB 0.111(8) 0.062(4) 0.086(6) -0.037(4) 0.034(7) -0.002(7)
O7 0.0381(16) 0.0309(15) 0.0242(14) -0.0094(11) 0.0012(12) 0.0144(13)
O3WA 0.113(7) 0.049(4) 0.093(6) 0.022(4) 0.022(4) 0.006(4)
O3WB 0.113(7) 0.049(4) 0.093(6) 0.022(4) 0.022(4) 0.006(4)
O8 0.0307(15) 0.0223(13) 0.0242(13) 0.0028(10) -0.0033(11) 0.0068(11)
O4WA 0.056(7) 0.017(5) 0.042(6) 0.000(4) 0.013(5) 0.005(5)
O4WB 0.051(10) 0.032(8) 0.081(12) -0.020(8) 0.044(9) -0.018(7)
O4WC 0.061(6) 0.064(6) 0.117(7) -0.036(6) 0.010(6) 0.000(5)
O4WD 0.061(6) 0.064(6) 0.117(7) -0.036(6) 0.010(6) 0.000(5)
O9 0.0347(16) 0.0336(16) 0.0265(14) -0.0044(12) 0.0044(12) -0.0154(13)
O10 0.0333(15) 0.0375(16) 0.0169(12) 0.0015(11) 0.0058(11) -0.0116(13)
O11 0.0325(15) 0.0403(17) 0.0174(13) -0.0103(11) 0.0005(11) -0.0056(13)
O12 0.0330(15) 0.0355(16) 0.0173(12) 0.0007(11) -0.0029(11) -0.0003(13)
O13 0.0214(12) 0.0189(12) 0.0162(11) 0.0012(9) 0.0052(9) 0.0036(10)
O14 0.0208(12) 0.0160(11) 0.0143(11) 0.0003(8) 0.0026(9) 0.0018(9)
O15 0.0214(12) 0.0144(11) 0.0145(11) 0.0025(8) 0.0032(9) 0.0030(9)
O16 0.0209(12) 0.0155(11) 0.0130(10) -0.0013(8) 0.0022(9) 0.0000(9)
O17 0.0227(12) 0.0180(12) 0.0143(11) 0.0004(9) 0.0039(9) -0.0011(10)
O18 0.0212(12) 0.0138(11) 0.0133(10) 0.0009(8) 0.0013(9) -0.0016(9)
O19 0.0220(12) 0.0158(11) 0.0167(11) -0.0005(9) 0.0036(9) -0.0003(9)
O20 0.0223(12) 0.0199(12) 0.0122(10) -0.0021(9) 0.0023(9) -0.0043(10)
O21 0.0206(12) 0.0225(13) 0.0146(11) -0.0019(9) 0.0038(9) -0.0027(10)
O22 0.0184(11) 0.0175(12) 0.0150(11) -0.0022(8) -0.0002(9) -0.0032(9)
O23 0.0239(13) 0.0228(13) 0.0157(11) -0.0049(9) 0.0013(9) -0.0054(10)
O24 0.0260(13) 0.0257(13) 0.0128(11) -0.0013(9) 0.0019(9) -0.0044(11)
O25 0.0371(15) 0.0153(12) 0.0246(13) 0.0002(10) 0.0038(11) -0.0010(11)
O26 0.0249(13) 0.0304(14) 0.0166(12) -0.0040(10) 0.0068(10) -0.0053(11)
O27 0.0295(14) 0.0160(12) 0.0179(12) 0.0018(9) -0.0010(10) -0.0074(10)
O28 0.0197(12) 0.0217(13) 0.0196(12) -0.0028(9) 0.0033(9) 0.0008(10)
N11 0.0206(14) 0.0200(14) 0.0166(13) -0.0023(11) 0.0001(11) -0.0038(12)
N12 0.0288(16) 0.0163(14) 0.0186(14) -0.0026(11) -0.0020(12) -0.0046(12)
N13 0.041(2) 0.0187(16) 0.0294(17) -0.0025(13) -0.0030(15) -0.0107(14)
N21 0.0199(15) 0.0293(17) 0.0182(14) -0.0006(12) 0.0021(11) 0.0035(13)
N22 0.0205(14) 0.0251(16) 0.0193(14) -0.0026(11) 0.0073(11) -0.0012(12)
N23 0.0298(18) 0.0316(19) 0.0374(19) -0.0018(15) 0.0147(15) 0.0052(15)
N31 0.0322(17) 0.0213(15) 0.0205(15) 0.0075(12) 0.0074(12) 0.0020(13)
N32 0.040(2) 0.0168(15) 0.0257(16) 0.0072(12) 0.0067(14) 0.0030(14)
N33 0.064(3) 0.027(2) 0.065(3) 0.0225(19) 0.017(2) 0.009(2)
N41 0.0231(15) 0.0222(15) 0.0140(13) 0.0014(11) 0.0060(11) 0.0014(12)
N42 0.0193(14) 0.0227(15) 0.0163(13) -0.0002(11) 0.0043(11) 0.0006(12)
N43 0.0267(16) 0.0263(16) 0.0237(16) -0.0044(12) 0.0080(12) 0.0056(13)
N51 0.0278(16) 0.0192(15) 0.0218(15) -0.0084(11) -0.0025(12) 0.0010(13)
N52 0.0344(19) 0.0186(15) 0.0276(17) -0.0028(12) 0.0017(14) 0.0008(14)
N53 0.048(2) 0.0212(17) 0.047(2) 0.0067(16) -0.0110(18) -0.0074(17)
N61 0.0298(17) 0.0292(17) 0.0160(14) -0.0059(12) 0.0023(12) -0.0024(14)
N62 0.0289(17) 0.0373(19) 0.0160(14) -0.0060(12) 0.0084(12) -0.0027(14)
N63 0.038(2) 0.058(3) 0.033(2) -0.0083(18) 0.0092(17) 0.002(2)
N71 0.0335(18) 0.0255(16) 0.0151(14) 0.0031(11) 0.0021(12) -0.0034(14)
N72 0.0346(18) 0.0243(16) 0.0186(15) 0.0059(12) -0.0015(13) -0.0066(14)
N73 0.052(2) 0.0290(19) 0.0275(18) 0.0102(14) -0.0031(16) -0.0148(17)
N81 0.0248(16) 0.0303(17) 0.0188(15) 0.0004(12) -0.0009(12) 0.0005(13)
N82 0.0233(16) 0.0319(18) 0.0215(15) -0.0030(13) -0.0023(12) -0.0031(14)
C83 0.0215(19) 0.049(3) 0.037(2) -0.008(2) 0.0112(17) -0.0040(19)
C14 0.042(3) 0.028(2) 0.035(2) -0.0016(17) -0.0001(18) -0.0151(19)
C15 0.0254(19) 0.035(2) 0.0211(18) -0.0016(15) -0.0007(14) -0.0093(16)
C24 0.024(2) 0.047(3) 0.040(2) 0.003(2) 0.0086(18) 0.0152(19)
C25 0.0195(18) 0.053(3) 0.0223(19) 0.0011(17) -0.0003(14) 0.0108(18)
C34 0.060(3) 0.055(3) 0.052(3) 0.034(2) 0.012(2) -0.004(2)
C35 0.036(2) 0.039(2) 0.0256(18) 0.0173(16) 0.0129(16) 0.0016(17)
C44 0.035(2) 0.036(2) 0.0242(19) -0.0097(16) 0.0043(16) 0.0111(18)
C45 0.033(2) 0.029(2) 0.0198(17) -0.0077(14) 0.0067(15) 0.0031(16)
C54 0.062(3) 0.027(2) 0.059(3) -0.001(2) -0.026(3) -0.018(2)
C55 0.036(2) 0.0214(19) 0.036(2) -0.0069(16) -0.0123(18) -0.0023(17)
C64 0.041(3) 0.047(3) 0.035(2) -0.013(2) 0.013(2) 0.009(2)
C65 0.029(2) 0.030(2) 0.0216(18) -0.0116(15) 0.0027(15) 0.0033(16)
C74 0.073(4) 0.038(3) 0.028(2) 0.0114(19) 0.001(2) -0.020(3)
C75 0.060(3) 0.035(2) 0.0197(19) 0.0070(16) 0.0035(19) -0.009(2)
C84 0.022(2) 0.054(3) 0.062(3) -0.012(3) 0.002(2) 0.009(2)
N85 0.038(2) 0.045(2) 0.039(2) -0.0036(18) -0.0105(17) 0.0120(19)

_geom_special_details            
;
 All esds (except the esd in the dihedral angle between two l.s. planes)
 are estimated using the full covariance matrix.  The cell esds are taken
 into account individually in the estimation of esds in distances, angles
 and torsion angles; correlations between esds in cell parameters are only
 used when they are defined by crystal symmetry.  An approximate (isotropic)
 treatment of cell esds is used for estimating esds involving l.s. planes.
;

loop_
_geom_bond_atom_site_label_1
_geom_bond_atom_site_label_2
_geom_bond_distance
_geom_bond_site_symmetry_2
_geom_bond_publ_flag
Mo1 O1 1.698(2) . ?
Mo1 O13 1.968(2) . ?
Mo1 O14 1.978(2) . ?
Mo1 O16 2.050(2) . ?
Mo1 N21 2.164(3) . ?
Mo1 N11 2.229(3) . ?
Mo1 Mo2 2.6036(4) . ?
Mo2 O2 1.691(2) . ?
Mo2 O14 1.968(2) . ?
Mo2 O13 1.977(2) . ?
Mo2 O15 2.049(2) . ?
Mo2 N41 2.162(3) . ?
Mo2 N31 2.203(3) . ?
Mo3 O3 1.683(3) . ?
Mo3 O25 1.927(3) . ?
Mo3 O17 1.980(2) . ?
Mo3 O15 2.132(2) . ?
Mo3 N32 2.198(3) . ?
Mo3 O13 2.199(2) . ?
Mo3 Mo7 2.5870(4) . ?
Mo4 O4 1.692(2) . ?
Mo4 O27 1.919(2) . ?
Mo4 O18 1.974(2) . ?
Mo4 O16 2.138(2) . ?
Mo4 O14 2.174(2) . ?
Mo4 N12 2.201(3) . ?
Mo4 Mo8 2.5832(4) . ?
Mo5 O5 1.687(3) . ?
Mo5 O28 1.954(2) . ?
Mo5 O19 1.962(2) . ?
Mo5 O15 1.993(2) . ?
Mo5 N42 2.188(3) . ?
Mo5 O18 2.275(2) . ?
Mo5 Mo9 2.5862(4) . ?
Mo6 O6 1.698(3) . ?
Mo6 O26 1.947(2) . ?
Mo6 O20 1.955(2) . ?
Mo6 O16 1.990(2) . ?
Mo6 N22 2.192(3) . ?
Mo6 O17 2.281(2) . ?
Mo6 Mo10 2.5731(4) . ?
Mo7 O7 1.692(3) . ?
Mo7 O17 1.949(2) . ?
Mo7 O25 1.964(3) . ?
Mo7 O21 1.986(2) . ?
Mo7 N52 2.202(3) . ?
Mo7 O19 2.271(2) . ?
Mo8 O8 1.690(3) . ?
Mo8 O27 1.953(2) . ?
Mo8 O18 1.957(2) . ?
Mo8 O22 1.974(2) . ?
Mo8 N72 2.174(3) . ?
Mo8 O20 2.352(2) . ?
Mo9 O9 1.694(3) . ?
Mo9 O28 1.913(2) . ?
Mo9 O19 1.970(2) . ?
Mo9 O22 2.142(2) . ?
Mo9 O23 2.173(2) . ?
Mo9 N82 2.193(3) . ?
Mo10 O10 1.693(3) . ?
Mo10 O26 1.923(3) . ?
Mo10 O20 1.975(2) . ?
Mo10 O21 2.119(2) . ?
Mo10 O24 2.192(2) . ?
Mo10 N62 2.213(3) . ?
Mo11 O11 1.688(2) . ?
Mo11 O23 1.966(3) . ?
Mo11 O24 1.973(3) . ?
Mo11 O21 2.082(2) . ?
Mo11 N51 2.157(3) . ?
Mo11 N61 2.190(3) . ?
Mo11 Mo12 2.6014(5) . ?
Mo12 O12 1.692(2) . ?
Mo12 O24 1.973(3) . ?
Mo12 O23 1.989(3) . ?
Mo12 O22 2.065(2) . ?
Mo12 N71 2.168(3) . ?
Mo12 N81 2.206(3) . ?
N11 C15 1.331(5) . ?
N11 N12 1.332(4) . ?
N12 N13 1.330(4) . ?
N13 C14 1.351(5) . ?
N21 C25 1.330(5) . ?
N21 N22 1.342(4) . ?
N22 N23 1.322(4) . ?
N23 C24 1.345(5) . ?
N31 C35 1.328(4) . ?
N31 N32 1.341(4) . ?
N32 N33 1.331(5) . ?
N33 C34 1.393(6) . ?
N41 C45 1.343(4) . ?
N41 N42 1.346(4) . ?
N42 N43 1.325(4) . ?
N43 C44 1.339(5) . ?
N51 C55 1.327(5) . ?
N51 N52 1.351(4) . ?
N52 N53 1.317(5) . ?
N53 C54 1.342(6) . ?
N61 C65 1.322(4) . ?
N61 N62 1.337(4) . ?
N62 N63 1.324(5) . ?
N63 C64 1.389(6) . ?
N71 N72 1.335(4) . ?
N71 C75 1.338(5) . ?
N72 N73 1.317(4) . ?
N73 C74 1.348(5) . ?
N81 N85 1.337(5) . ?
N81 N82 1.346(4) . ?
N82 C83 1.305(5) . ?
C83 C84 1.354(7) . ?
C14 C15 1.394(6) . ?
C24 C25 1.356(6) . ?
C34 C35 1.334(7) . ?
C44 C45 1.369(5) . ?
C54 C55 1.362(6) . ?
C64 C65 1.340(6) . ?
C74 C75 1.369(6) . ?
C84 N85 1.372(6) . ?

loop_
_geom_angle_atom_site_label_1
_geom_angle_atom_site_label_2
_geom_angle_atom_site_label_3
_geom_angle
_geom_angle_site_symmetry_1
_geom_angle_site_symmetry_3
_geom_angle_publ_flag
O1 Mo1 O13 104.23(11) . . ?
O1 Mo1 O14 111.63(11) . . ?
O13 Mo1 O14 94.55(10) . . ?
O1 Mo1 O16 156.52(11) . . ?
O13 Mo1 O16 96.92(9) . . ?
O14 Mo1 O16 76.18(9) . . ?
O1 Mo1 N21 90.85(12) . . ?
O13 Mo1 N21 82.45(11) . . ?
O14 Mo1 N21 157.30(10) . . ?
O16 Mo1 N21 81.83(10) . . ?
O1 Mo1 N11 83.62(11) . . ?
O13 Mo1 N11 172.13(10) . . ?
O14 Mo1 N11 82.90(10) . . ?
O16 Mo1 N11 75.25(10) . . ?
N21 Mo1 N11 97.02(11) . . ?
O1 Mo1 Mo2 103.61(9) . . ?
O13 Mo1 Mo2 48.84(7) . . ?
O14 Mo1 Mo2 48.55(7) . . ?
O16 Mo1 Mo2 97.93(7) . . ?
N21 Mo1 Mo2 131.09(9) . . ?
N11 Mo1 Mo2 130.50(8) . . ?
O2 Mo2 O14 103.31(11) . . ?
O2 Mo2 O13 112.53(11) . . ?
O14 Mo2 O13 94.60(10) . . ?
O2 Mo2 O15 156.97(11) . . ?
O14 Mo2 O15 96.73(9) . . ?
O13 Mo2 O15 76.54(9) . . ?
O2 Mo2 N41 90.35(11) . . ?
O14 Mo2 N41 82.38(10) . . ?
O13 Mo2 N41 156.93(10) . . ?
O15 Mo2 N41 81.10(10) . . ?
O2 Mo2 N31 83.97(12) . . ?
O14 Mo2 N31 172.65(10) . . ?
O13 Mo2 N31 81.51(11) . . ?
O15 Mo2 N31 76.34(10) . . ?
N41 Mo2 N31 98.74(12) . . ?
O2 Mo2 Mo1 103.60(9) . . ?
O14 Mo2 Mo1 48.88(7) . . ?
O13 Mo2 Mo1 48.55(7) . . ?
O15 Mo2 Mo1 98.07(7) . . ?
N41 Mo2 Mo1 131.04(8) . . ?
N31 Mo2 Mo1 128.92(9) . . ?
O3 Mo3 O25 104.35(13) . . ?
O3 Mo3 O17 103.82(12) . . ?
O25 Mo3 O17 95.87(10) . . ?
O3 Mo3 O15 158.42(11) . . ?
O25 Mo3 O15 93.30(10) . . ?
O17 Mo3 O15 86.30(9) . . ?
O3 Mo3 N32 92.62(13) . . ?
O25 Mo3 N32 86.08(12) . . ?
O17 Mo3 N32 162.34(11) . . ?
O15 Mo3 N32 76.05(10) . . ?
O3 Mo3 O13 89.70(11) . . ?
O25 Mo3 O13 159.94(10) . . ?
O17 Mo3 O13 94.52(9) . . ?
O15 Mo3 O13 70.30(9) . . ?
N32 Mo3 O13 78.94(11) . . ?
O3 Mo3 Mo7 101.95(9) . . ?
O25 Mo3 Mo7 48.95(8) . . ?
O17 Mo3 Mo7 48.29(7) . . ?
O15 Mo3 Mo7 98.99(6) . . ?
N32 Mo3 Mo7 134.78(9) . . ?
O13 Mo3 Mo7 142.58(6) . . ?
O4 Mo4 O27 104.66(12) . . ?
O4 Mo4 O18 105.40(11) . . ?
O27 Mo4 O18 95.75(10) . . ?
O4 Mo4 O16 156.75(10) . . ?
O27 Mo4 O16 93.90(10) . . ?
O18 Mo4 O16 86.17(9) . . ?
O4 Mo4 O14 88.24(11) . . ?
O27 Mo4 O14 160.17(10) . . ?
O18 Mo4 O14 95.20(9) . . ?
O16 Mo4 O14 70.41(8) . . ?
O4 Mo4 N12 92.30(12) . . ?
O27 Mo4 N12 85.04(11) . . ?
O18 Mo4 N12 161.39(11) . . ?
O16 Mo4 N12 75.23(10) . . ?
O14 Mo4 N12 79.36(10) . . ?
O4 Mo4 Mo8 102.63(9) . . ?
O27 Mo4 Mo8 48.71(7) . . ?
O18 Mo4 Mo8 48.63(6) . . ?
O16 Mo4 Mo8 100.12(6) . . ?
O14 Mo4 Mo8 143.73(6) . . ?
N12 Mo4 Mo8 133.51(8) . . ?
O5 Mo5 O28 102.71(12) . . ?
O5 Mo5 O19 104.25(11) . . ?
O28 Mo5 O19 94.95(10) . . ?
O5 Mo5 O15 98.88(11) . . ?
O28 Mo5 O15 155.47(10) . . ?
O19 Mo5 O15 90.86(10) . . ?
O5 Mo5 N42 92.89(12) . . ?
O28 Mo5 N42 85.72(10) . . ?
O19 Mo5 N42 162.20(10) . . ?
O15 Mo5 N42 81.68(10) . . ?
O5 Mo5 O18 170.23(11) . . ?
O28 Mo5 O18 78.88(9) . . ?
O19 Mo5 O18 85.11(9) . . ?
O15 Mo5 O18 77.90(9) . . ?
N42 Mo5 O18 77.55(10) . . ?
O5 Mo5 Mo9 100.70(9) . . ?
O28 Mo5 Mo9 47.36(7) . . ?
O19 Mo5 Mo9 49.00(7) . . ?
O15 Mo5 Mo9 138.58(7) . . ?
N42 Mo5 Mo9 132.87(8) . . ?
O18 Mo5 Mo9 87.50(6) . . ?
O6 Mo6 O26 102.15(12) . . ?
O6 Mo6 O20 105.41(12) . . ?
O26 Mo6 O20 95.95(10) . . ?
O6 Mo6 O16 99.39(11) . . ?
O26 Mo6 O16 154.94(10) . . ?
O20 Mo6 O16 90.50(9) . . ?
O6 Mo6 N22 90.14(12) . . ?
O26 Mo6 N22 85.37(11) . . ?
O20 Mo6 N22 163.67(11) . . ?
O16 Mo6 N22 81.91(10) . . ?
O6 Mo6 O17 168.82(11) . . ?
O26 Mo6 O17 78.69(9) . . ?
O20 Mo6 O17 85.49(9) . . ?
O16 Mo6 O17 77.71(9) . . ?
N22 Mo6 O17 78.79(10) . . ?
O6 Mo6 Mo10 101.22(9) . . ?
O26 Mo6 Mo10 47.94(8) . . ?
O20 Mo6 Mo10 49.44(7) . . ?
O16 Mo6 Mo10 138.58(7) . . ?
N22 Mo6 Mo10 133.21(8) . . ?
O17 Mo6 Mo10 87.66(6) . . ?
O7 Mo7 O17 102.69(12) . . ?
O7 Mo7 O25 102.06(13) . . ?
O17 Mo7 O25 95.70(10) . . ?
O7 Mo7 O21 99.22(12) . . ?
O17 Mo7 O21 91.54(10) . . ?
O25 Mo7 O21 155.38(11) . . ?
O7 Mo7 N52 91.21(13) . . ?
O17 Mo7 N52 165.21(11) . . ?
O25 Mo7 N52 86.16(12) . . ?
O21 Mo7 N52 81.14(11) . . ?
O7 Mo7 O19 172.15(11) . . ?
O17 Mo7 O19 85.05(9) . . ?
O25 Mo7 O19 78.19(10) . . ?
O21 Mo7 O19 79.04(9) . . ?
N52 Mo7 O19 80.97(10) . . ?
O7 Mo7 Mo3 99.30(9) . . ?
O17 Mo7 Mo3 49.34(7) . . ?
O25 Mo7 Mo3 47.72(8) . . ?
O21 Mo7 Mo3 139.57(7) . . ?
N52 Mo7 Mo3 133.85(9) . . ?
O19 Mo7 Mo3 86.70(6) . . ?
O8 Mo8 O27 102.92(12) . . ?
O8 Mo8 O18 104.15(11) . . ?
O27 Mo8 O18 95.21(10) . . ?
O8 Mo8 O22 101.33(12) . . ?
O27 Mo8 O22 152.78(10) . . ?
O18 Mo8 O22 90.67(9) . . ?
O8 Mo8 N72 93.06(13) . . ?
O27 Mo8 N72 84.82(11) . . ?
O18 Mo8 N72 162.28(12) . . ?
O22 Mo8 N72 81.72(11) . . ?
O8 Mo8 O20 172.66(10) . . ?
O27 Mo8 O20 77.38(10) . . ?
O18 Mo8 O20 83.07(9) . . ?
O22 Mo8 O20 77.00(9) . . ?
N72 Mo8 O20 79.64(11) . . ?
O8 Mo8 Mo4 100.28(9) . . ?
O27 Mo8 Mo4 47.60(7) . . ?
O18 Mo8 Mo4 49.19(7) . . ?
O22 Mo8 Mo4 138.09(7) . . ?
N72 Mo8 Mo4 132.27(9) . . ?
O20 Mo8 Mo4 85.37(6) . . ?
O9 Mo9 O28 105.01(12) . . ?
O9 Mo9 O19 104.29(13) . . ?
O28 Mo9 O19 95.98(10) . . ?
O9 Mo9 O22 159.36(11) . . ?
O28 Mo9 O22 90.55(10) . . ?
O19 Mo9 O22 87.11(9) . . ?
O9 Mo9 O23 90.78(11) . . ?
O28 Mo9 O23 157.61(10) . . ?
O19 Mo9 O23 95.35(10) . . ?
O22 Mo9 O23 70.80(9) . . ?
O9 Mo9 N82 91.53(14) . . ?
O28 Mo9 N82 83.99(11) . . ?
O19 Mo9 N82 163.56(11) . . ?
O22 Mo9 N82 76.45(11) . . ?
O23 Mo9 N82 79.73(11) . . ?
O9 Mo9 Mo5 102.57(9) . . ?
O28 Mo9 Mo5 48.70(7) . . ?
O19 Mo9 Mo5 48.73(7) . . ?
O22 Mo9 Mo5 97.88(6) . . ?
O23 Mo9 Mo5 143.61(7) . . ?
N82 Mo9 Mo5 132.57(8) . . ?
O10 Mo10 O26 105.67(12) . . ?
O10 Mo10 O20 104.03(12) . . ?
O26 Mo10 O20 96.05(10) . . ?
O10 Mo10 O21 158.08(11) . . ?
O26 Mo10 O21 91.40(10) . . ?
O20 Mo10 O21 87.35(9) . . ?
O10 Mo10 O24 88.97(11) . . ?
O26 Mo10 O24 158.61(10) . . ?
O20 Mo10 O24 95.38(10) . . ?
O21 Mo10 O24 71.13(9) . . ?
O10 Mo10 N62 91.47(13) . . ?
O26 Mo10 N62 84.63(11) . . ?
O20 Mo10 N62 163.62(11) . . ?
O21 Mo10 N62 76.27(11) . . ?
O24 Mo10 N62 79.38(11) . . ?
O10 Mo10 Mo6 102.92(9) . . ?
O26 Mo10 Mo6 48.73(7) . . ?
O20 Mo10 Mo6 48.76(7) . . ?
O21 Mo10 Mo6 98.66(6) . . ?
O24 Mo10 Mo6 143.82(7) . . ?
N62 Mo10 Mo6 133.24(9) . . ?
O11 Mo11 O23 104.44(12) . . ?
O11 Mo11 O24 111.41(12) . . ?
O23 Mo11 O24 94.72(10) . . ?
O11 Mo11 O21 158.56(12) . . ?
O23 Mo11 O21 94.47(9) . . ?
O24 Mo11 O21 76.35(10) . . ?
O11 Mo11 N51 91.66(13) . . ?
O23 Mo11 N51 84.73(11) . . ?
O24 Mo11 N51 156.18(10) . . ?
O21 Mo11 N51 79.94(10) . . ?
O11 Mo11 N61 84.73(12) . . ?
O23 Mo11 N61 170.72(10) . . ?
O24 Mo11 N61 83.02(11) . . ?
O21 Mo11 N61 76.25(10) . . ?
N51 Mo11 N61 93.69(12) . . ?
O11 Mo11 Mo12 102.57(10) . . ?
O23 Mo11 Mo12 49.26(7) . . ?
O24 Mo11 Mo12 48.77(8) . . ?
O21 Mo11 Mo12 97.38(7) . . ?
N51 Mo11 Mo12 133.79(9) . . ?
N61 Mo11 Mo12 130.86(9) . . ?
O12 Mo12 O24 104.13(12) . . ?
O12 Mo12 O23 111.78(12) . . ?
O24 Mo12 O23 93.99(10) . . ?
O12 Mo12 O22 156.89(12) . . ?
O24 Mo12 O22 96.69(9) . . ?
O23 Mo12 O22 76.11(9) . . ?
O12 Mo12 N71 91.79(13) . . ?
O24 Mo12 N71 81.95(12) . . ?
O23 Mo12 N71 156.32(10) . . ?
O22 Mo12 N71 81.19(10) . . ?
O12 Mo12 N81 83.91(13) . . ?
O24 Mo12 N81 171.94(10) . . ?
O23 Mo12 N81 83.31(12) . . ?
O22 Mo12 N81 75.30(10) . . ?
N71 Mo12 N81 97.46(13) . . ?
O12 Mo12 Mo11 102.59(10) . . ?
O24 Mo12 Mo11 48.76(7) . . ?
O23 Mo12 Mo11 48.50(7) . . ?
O22 Mo12 Mo11 98.62(7) . . ?
N71 Mo12 Mo11 130.55(9) . . ?
N81 Mo12 Mo11 130.65(9) . . ?
Mo1 O13 Mo2 82.61(9) . . ?
Mo1 O13 Mo3 133.11(11) . . ?
Mo2 O13 Mo3 103.60(11) . . ?
Mo2 O14 Mo1 82.57(9) . . ?
Mo2 O14 Mo4 133.37(12) . . ?
Mo1 O14 Mo4 104.29(10) . . ?
Mo5 O15 Mo2 131.12(12) . . ?
Mo5 O15 Mo3 125.12(11) . . ?
Mo2 O15 Mo3 103.54(10) . . ?
Mo6 O16 Mo1 130.67(12) . . ?
Mo6 O16 Mo4 125.97(11) . . ?
Mo1 O16 Mo4 103.12(9) . . ?
Mo7 O17 Mo3 82.37(9) . . ?
Mo7 O17 Mo6 131.56(11) . . ?
Mo3 O17 Mo6 145.60(12) . . ?
Mo8 O18 Mo4 82.17(9) . . ?
Mo8 O18 Mo5 131.90(11) . . ?
Mo4 O18 Mo5 145.15(11) . . ?
Mo5 O19 Mo9 82.27(9) . . ?
Mo5 O19 Mo7 133.47(12) . . ?
Mo9 O19 Mo7 144.14(12) . . ?
Mo6 O20 Mo10 81.80(9) . . ?
Mo6 O20 Mo8 133.52(11) . . ?
Mo10 O20 Mo8 144.62(12) . . ?
Mo7 O21 Mo11 131.75(12) . . ?
Mo7 O21 Mo10 125.55(12) . . ?
Mo11 O21 Mo10 102.42(10) . . ?
Mo8 O22 Mo12 131.34(12) . . ?
Mo8 O22 Mo9 125.68(11) . . ?
Mo12 O22 Mo9 102.46(9) . . ?
Mo11 O23 Mo12 82.24(9) . . ?
Mo11 O23 Mo9 135.56(12) . . ?
Mo12 O23 Mo9 103.95(10) . . ?
Mo11 O24 Mo12 82.47(10) . . ?
Mo11 O24 Mo10 103.51(11) . . ?
Mo12 O24 Mo10 132.96(12) . . ?
Mo3 O25 Mo7 83.33(10) . . ?
Mo10 O26 Mo6 83.33(10) . . ?
Mo4 O27 Mo8 83.68(9) . . ?
Mo9 O28 Mo5 83.94(10) . . ?
C15 N11 N12 108.0(3) . . ?
C15 N11 Mo1 137.5(3) . . ?
N12 N11 Mo1 114.4(2) . . ?
N13 N12 N11 111.4(3) . . ?
N13 N12 Mo4 130.9(2) . . ?
N11 N12 Mo4 117.7(2) . . ?
N12 N13 C14 105.6(3) . . ?
C25 N21 N22 108.1(3) . . ?
C25 N21 Mo1 127.9(3) . . ?
N22 N21 Mo1 121.1(2) . . ?
N23 N22 N21 109.9(3) . . ?
N23 N22 Mo6 128.2(2) . . ?
N21 N22 Mo6 121.7(2) . . ?
N22 N23 C24 106.1(3) . . ?
C35 N31 N32 108.6(3) . . ?
C35 N31 Mo2 134.4(3) . . ?
N32 N31 Mo2 116.3(2) . . ?
N33 N32 N31 110.7(3) . . ?
N33 N32 Mo3 132.7(3) . . ?
N31 N32 Mo3 116.1(2) . . ?
N32 N33 C34 103.7(4) . . ?
C45 N41 N42 107.1(3) . . ?
C45 N41 Mo2 128.1(3) . . ?
N42 N41 Mo2 121.6(2) . . ?
N43 N42 N41 110.8(3) . . ?
N43 N42 Mo5 128.1(2) . . ?
N41 N42 Mo5 120.9(2) . . ?
N42 N43 C44 106.1(3) . . ?
C55 N51 N52 107.6(3) . . ?
C55 N51 Mo11 128.8(3) . . ?
N52 N51 Mo11 122.4(2) . . ?
N53 N52 N51 110.2(3) . . ?
N53 N52 Mo7 127.6(3) . . ?
N51 N52 Mo7 120.7(2) . . ?
N52 N53 C54 106.0(4) . . ?
C65 N61 N62 108.9(3) . . ?
C65 N61 Mo11 134.6(3) . . ?
N62 N61 Mo11 116.3(2) . . ?
N63 N62 N61 110.3(3) . . ?
N63 N62 Mo10 133.8(3) . . ?
N61 N62 Mo10 115.9(2) . . ?
N62 N63 C64 104.6(4) . . ?
N72 N71 C75 107.8(3) . . ?
N72 N71 Mo12 121.6(2) . . ?
C75 N71 Mo12 129.4(3) . . ?
N73 N72 N71 110.3(3) . . ?
N73 N72 Mo8 126.5(2) . . ?
N71 N72 Mo8 123.2(2) . . ?
N72 N73 C74 106.9(4) . . ?
N85 N81 N82 109.2(3) . . ?
N85 N81 Mo12 134.5(3) . . ?
N82 N81 Mo12 115.6(2) . . ?
C83 N82 N81 109.2(3) . . ?
C83 N82 Mo9 134.5(3) . . ?
N81 N82 Mo9 116.3(2) . . ?
N82 C83 C84 107.5(4) . . ?
N13 C14 C15 108.7(4) . . ?
N11 C15 C14 106.3(3) . . ?
N23 C24 C25 109.5(4) . . ?
N21 C25 C24 106.4(3) . . ?
C35 C34 N33 110.1(4) . . ?
N31 C35 C34 106.8(4) . . ?
N43 C44 C45 109.5(3) . . ?
N41 C45 C44 106.5(3) . . ?
N53 C54 C55 109.6(4) . . ?
N51 C55 C54 106.5(4) . . ?
C65 C64 N63 109.2(4) . . ?
N61 C65 C64 107.0(4) . . ?
N73 C74 C75 108.2(4) . . ?
N71 C75 C74 106.7(4) . . ?
C83 C84 N85 108.7(4) . . ?
N81 N85 C84 105.4(4) . . ?

_refine_diff_density_max         1.260
_refine_diff_density_min         -1.537
_refine_diff_density_rms         0.188

_shelx_res_file                  
;

    D:\Job\SHESTO~1\jul167_3\jul167-3.res created by SHELXL-2014/7

TITL JUL167_3 in P21/n
CELL 0.71073 11.7496 21.5118 22.6938 90.000 102.174 90.000
ZERR 4.0000 0.0004 0.0007 0.0007 0.000 0.001 0.000
LATT 1
SYMM 0.5-X, 0.5+Y, 0.5-Z
SFAC C H MO N O
UNIT 64 160 48 112 128
MERG 2
OMIT 0 180
FMAP 2
GRID
PLAN 5
TEMP -123
SIZE 0.082 0.083 0.114
OMIT  0 4 1
OMIT     0 0 2
OMIT   1 2 0
OMIT   0 3 5
OMIT   -4 1 2
OMIT   -3 1 3
OMIT   -5 1 4
OMIT   -3 1 4
OMIT   3 5 5
EADP O1WA O1WB
EADP O2WA O2WB
EADP O3WA O3WB
ISOR 0.008 0.008 O4WA O4WC
ISOR 0.005 0.005 N2N C35 C34
EADP O4WC O4WD
OMIT  -1 3 5
OMIT  1 3 0
OMIT  -1 3 1
OMIT  -1 4 1
OMIT  -2 1 2
OMIT 0 3 3
L.S. 14
ACTA 50.5
WGHT    0.037900
FVAR       0.12608
MO1   3    0.240561    0.074747    0.584440    11.00000    0.01805    0.01963 =
         0.01181   -0.00107    0.00108    0.00073
MO2   3    0.419172    0.130390    0.556937    11.00000    0.02088    0.01907 =
         0.01204    0.00204    0.00364    0.00248
MO3   3    0.364454    0.226081    0.660274    11.00000    0.02738    0.01349 =
         0.01648    0.00072    0.00437    0.00295
MO4   3    0.453729   -0.006024    0.665969    11.00000    0.02069    0.01374 =
         0.01320   -0.00094   -0.00049   -0.00045
MO5   3    0.650070    0.150509    0.692917    11.00000    0.01925    0.01553 =
         0.01488   -0.00031    0.00440   -0.00173
MO6   3    0.263069    0.077881    0.748268    11.00000    0.01999    0.02112 =
         0.01217   -0.00104    0.00339   -0.00436
MO7   3    0.433770    0.232110    0.776155    11.00000    0.02433    0.01447 =
         0.01681   -0.00311    0.00272    0.00156
MO8   3    0.577217    0.002446    0.774250    11.00000    0.02285    0.01384 =
         0.01301    0.00127   -0.00123   -0.00136
MO9   3    0.746064    0.146208    0.806403    11.00000    0.01993    0.01902 =
         0.01594   -0.00230    0.00187   -0.00476
MO10  3    0.355538    0.099355    0.859612    11.00000    0.02375    0.02692 =
         0.01201   -0.00213    0.00446   -0.00671
MO11  3    0.577927    0.181142    0.930110    11.00000    0.02433    0.02432 =
         0.01352   -0.00501    0.00197   -0.00369
MO12  3    0.680490    0.075115    0.922754    11.00000    0.02484    0.02342 =
         0.01243    0.00033   -0.00088   -0.00199
O1    5    0.146830    0.066207    0.516887    11.00000    0.02388    0.02646 =
         0.01609   -0.00182   -0.00179    0.00345
N1N   4    0.237078    0.387400    0.729427    11.00000    0.05376    0.03949 =
         0.05784    0.00378    0.01182    0.02093
O2    5    0.392861    0.125883    0.480895    11.00000    0.02769    0.03180 =
         0.01469    0.00254    0.00610    0.00428
N2N   4    0.288764    0.413384    0.623388    11.00000    0.10238    0.05642 =
         0.05918    0.01016    0.03372    0.01826
O3    5    0.240590    0.267866    0.648791    11.00000    0.04425    0.02550 =
         0.02443    0.00018    0.00476    0.01514
N3N   4    0.576911    0.508584    0.779318    11.00000    0.02797    0.05465 =
         0.03931    0.00670    0.00138   -0.00954
O4    5    0.537748   -0.050939    0.631138    11.00000    0.02998    0.02147 =
         0.02198   -0.00535    0.00167    0.00510
PART 2
O1WA  5    0.499941    0.409134    0.703844    10.75000    0.10376    0.01922 =
         0.07280    0.00309    0.01917    0.00833
PART 1
O1WB  5    0.562551    0.394705    0.698117    10.25000    0.10376    0.01922 =
         0.07280    0.00309    0.01917    0.00833
PART 0
O5    5    0.718565    0.212638    0.671100    11.00000    0.02827    0.02212 =
         0.02963    0.00343    0.01135   -0.00330
PART 1
N4NA  4    0.073779    0.221534    0.816357    10.50000    0.04742    0.10713 =
         0.04946   -0.00667    0.01339    0.03632
PART 2
N4NB  4    0.102295    0.256279    0.813404    10.50000    0.03935    0.04011 =
         0.06764    0.00876    0.01257    0.00883
PART 0
O6    5    0.177931    0.015481    0.754474    11.00000    0.02805    0.02847 =
         0.02248    0.00100    0.00468   -0.01029
PART 1
O2WA  5    0.005618    0.313575    0.880037    10.50000    0.11120    0.06233 =
         0.08635   -0.03669    0.03414   -0.00161
PART 2
O2WB  5   -0.074772    0.319446    0.865657    10.50000    0.11120    0.06233 =
         0.08635   -0.03669    0.03414   -0.00161
PART 0
O7    5    0.326069    0.276860    0.792498    11.00000    0.03809    0.03092 =
         0.02418   -0.00936    0.00116    0.01436
PART 1
O3WA  5    1.010554    0.304157    0.707001    10.50000    0.11304    0.04872 =
         0.09288    0.02205    0.02220    0.00634
PART 2
O3WB  5    0.942308    0.319172    0.734075    10.50000    0.11304    0.04872 =
         0.09288    0.02205    0.02220    0.00634
PART 0
O8    5    0.693679   -0.040994    0.767552    11.00000    0.03069    0.02225 =
         0.02424    0.00276   -0.00329    0.00678
PART 1
O4WA  5    0.781691    0.324398    0.748563    10.25000    0.05592    0.01717 =
         0.04220   -0.00029    0.01344    0.00493
PART 2
O4WB  5    0.720612    0.332691    0.717201    10.25000    0.05118    0.03183 =
         0.08124   -0.02042    0.04374   -0.01793
PART 3
O4WC  5    0.697855    0.345268    0.665277    10.25000    0.06141    0.06447 =
         0.11658   -0.03566    0.01042    0.00038
PART 0
O4WD  5    0.667154    0.401690    0.551874    10.25000    0.06141    0.06447 =
         0.11658   -0.03566    0.01042    0.00038
O9    5    0.836796    0.208246    0.814945    11.00000    0.03468    0.03362 =
         0.02647   -0.00444    0.00436   -0.01536
O10   5    0.302981    0.040800    0.896006    11.00000    0.03329    0.03746 =
         0.01685    0.00147    0.00582   -0.01164
O11   5    0.634911    0.203649    1.001482    11.00000    0.03245    0.04030 =
         0.01743   -0.01027    0.00050   -0.00560
O12   5    0.747714    0.061427    0.995148    11.00000    0.03299    0.03546 =
         0.01725    0.00068   -0.00291   -0.00031
O13   5    0.284610    0.163118    0.586805    11.00000    0.02138    0.01892 =
         0.01622    0.00116    0.00516    0.00363
O14   5    0.398143    0.044190    0.581680    11.00000    0.02083    0.01598 =
         0.01435    0.00032    0.00257    0.00176
O15   5    0.492658    0.163653    0.640933    11.00000    0.02140    0.01444 =
         0.01453    0.00251    0.00321    0.00300
O16   5    0.313428    0.054983    0.672696    11.00000    0.02089    0.01551 =
         0.01298   -0.00132    0.00222    0.00005
O17   5    0.348069    0.167416    0.725201    11.00000    0.02275    0.01804 =
         0.01427    0.00042    0.00386   -0.00108
O18   5    0.557572    0.060354    0.706345    11.00000    0.02116    0.01377 =
         0.01328    0.00094    0.00128   -0.00156
O19   5    0.595071    0.179837    0.763874    11.00000    0.02204    0.01583 =
         0.01674   -0.00049    0.00363   -0.00028
O20   5    0.417214    0.056944    0.795753    11.00000    0.02226    0.01992 =
         0.01223   -0.00211    0.00225   -0.00434
O21   5    0.460400    0.176492    0.847572    11.00000    0.02062    0.02248 =
         0.01457   -0.00192    0.00376   -0.00275
O22   5    0.651566    0.068180    0.830028    11.00000    0.01843    0.01750 =
         0.01503   -0.00217   -0.00021   -0.00321
O23   5    0.714023    0.160109    0.896343    11.00000    0.02387    0.02276 =
         0.01573   -0.00488    0.00128   -0.00538
O24   5    0.518703    0.095133    0.927375    11.00000    0.02604    0.02568 =
         0.01278   -0.00129    0.00193   -0.00442
O25   5    0.478366    0.278723    0.710105    11.00000    0.03708    0.01531 =
         0.02455    0.00017    0.00376   -0.00099
O26   5    0.222132    0.135309    0.806794    11.00000    0.02492    0.03041 =
         0.01663   -0.00402    0.00676   -0.00531
O27   5    0.445855   -0.050505    0.738318    11.00000    0.02952    0.01600 =
         0.01789    0.00175   -0.00104   -0.00740
O28   5    0.778766    0.101614    0.738930    11.00000    0.01966    0.02174 =
         0.01957   -0.00284    0.00326    0.00077
N11   4    0.205182   -0.026051    0.594640    11.00000    0.02061    0.01999 =
         0.01660   -0.00234    0.00010   -0.00378
N12   4    0.295263   -0.058120    0.625542    11.00000    0.02880    0.01627 =
         0.01863   -0.00255   -0.00202   -0.00460
N13   4    0.269592   -0.118115    0.628396    11.00000    0.04147    0.01872 =
         0.02941   -0.00252   -0.00301   -0.01073
N21   4    0.101784    0.109856    0.624554    11.00000    0.01986    0.02933 =
         0.01820   -0.00055    0.00210    0.00347
N22   4    0.118985    0.120820    0.684000    11.00000    0.02052    0.02512 =
         0.01926   -0.00261    0.00732   -0.00115
N23   4    0.034368    0.156240    0.695558    11.00000    0.02977    0.03157 =
         0.03742   -0.00184    0.01473    0.00520
N31   4    0.444426    0.230053    0.541469    11.00000    0.03222    0.02127 =
         0.02050    0.00751    0.00744    0.00202
N32   4    0.420437    0.269175    0.583240    11.00000    0.04017    0.01676 =
         0.02566    0.00717    0.00672    0.00296
N33   4    0.423785    0.327906    0.565197    11.00000    0.06376    0.02694 =
         0.06486    0.02248    0.01678    0.00939
N41   4    0.595908    0.099088    0.562278    11.00000    0.02312    0.02219 =
         0.01395    0.00138    0.00596    0.00140
N42   4    0.672464    0.095001    0.615353    11.00000    0.01929    0.02272 =
         0.01630   -0.00018    0.00427    0.00056
N43   4    0.760948    0.058485    0.610689    11.00000    0.02673    0.02629 =
         0.02369   -0.00439    0.00804    0.00555
N51   4    0.598760    0.273098    0.896031    11.00000    0.02782    0.01916 =
         0.02184   -0.00844   -0.00251    0.00096
N52   4    0.566900    0.287386    0.836853    11.00000    0.03445    0.01863 =
         0.02760   -0.00284    0.00170    0.00077
N53   4    0.606502    0.342765    0.826691    11.00000    0.04824    0.02124 =
         0.04702    0.00675   -0.01098   -0.00745
N61   4    0.410115    0.202865    0.952758    11.00000    0.02980    0.02923 =
         0.01600   -0.00586    0.00230   -0.00239
N62   4    0.319565    0.168228    0.925781    11.00000    0.02890    0.03729 =
         0.01603   -0.00600    0.00837   -0.00271
N63   4    0.225477    0.183291    0.946038    11.00000    0.03841    0.05820 =
         0.03325   -0.00825    0.00925    0.00236
N71   4    0.610451   -0.018432    0.912547    11.00000    0.03350    0.02552 =
         0.01509    0.00315    0.00210   -0.00339
N72   4    0.562485   -0.041732    0.858468    11.00000    0.03463    0.02430 =
         0.01859    0.00587   -0.00149   -0.00656
N73   4    0.508616   -0.094318    0.864451    11.00000    0.05242    0.02904 =
         0.02745    0.01022   -0.00308   -0.01475
N81   4    0.852900    0.053825    0.903731    11.00000    0.02482    0.03034 =
         0.01880    0.00038   -0.00089    0.00052
N82   4    0.882405    0.086841    0.858849    11.00000    0.02325    0.03189 =
         0.02150   -0.00303   -0.00231   -0.00311
C83   1    0.991170    0.075944    0.857762    11.00000    0.02155    0.04922 =
         0.03745   -0.00786    0.01123   -0.00403
AFIX  43
H83   2    1.033530    0.093420    0.830475    11.00000   -1.20000
AFIX   0
C14   1    0.158121   -0.123829    0.598059    11.00000    0.04183    0.02762 =
         0.03539   -0.00163   -0.00010   -0.01513
AFIX  43
H14   2    0.114527   -0.161349    0.592447    11.00000   -1.20000
AFIX   0
C15   1    0.117681   -0.065526    0.576357    11.00000    0.02536    0.03477 =
         0.02106   -0.00161   -0.00069   -0.00926
AFIX  43
H15   2    0.042613   -0.055893    0.553140    11.00000   -1.20000
AFIX   0
C24   1   -0.035911    0.168439    0.641905    11.00000    0.02418    0.04700 =
         0.04011    0.00335    0.00858    0.01517
AFIX  43
H24   2   -0.104546    0.193028    0.635998    11.00000   -1.20000
AFIX   0
C25   1    0.006333    0.140222    0.597548    11.00000    0.01946    0.05279 =
         0.02225    0.00109   -0.00034    0.01075
AFIX  43
H25A  2   -0.025862    0.141819    0.555502    11.00000   -1.20000
AFIX   0
C34   1    0.452389    0.322876    0.508865    11.00000    0.06008    0.05471 =
         0.05243    0.03428    0.01201   -0.00423
AFIX  43
H34   2    0.462436    0.356980    0.483858    11.00000   -1.20000
AFIX   0
C35   1    0.463625    0.263190    0.495134    11.00000    0.03595    0.03868 =
         0.02556    0.01732    0.01295    0.00158
AFIX  43
H35   2    0.481858    0.247417    0.459128    11.00000   -1.20000
AFIX   0
C44   1    0.739839    0.038822    0.553432    11.00000    0.03467    0.03583 =
         0.02417   -0.00968    0.00431    0.01105
AFIX  43
H44   2    0.788453    0.011638    0.536761    11.00000   -1.20000
AFIX   0
C45   1    0.637372    0.063934    0.522606    11.00000    0.03291    0.02939 =
         0.01977   -0.00767    0.00673    0.00315
AFIX  43
H45   2    0.602483    0.057719    0.481302    11.00000   -1.20000
AFIX   0
C54   1    0.666785    0.363130    0.880086    11.00000    0.06173    0.02684 =
         0.05885   -0.00106   -0.02606   -0.01790
AFIX  43
H54   2    0.707508    0.401508    0.886574    11.00000   -1.20000
AFIX   0
C55   1    0.660671    0.320366    0.923567    11.00000    0.03620    0.02144 =
         0.03577   -0.00687   -0.01225   -0.00228
AFIX  43
H55   2    0.694130    0.323709    0.965373    11.00000   -1.20000
AFIX   0
C64   1    0.262526    0.229696    0.988257    11.00000    0.04126    0.04684 =
         0.03487   -0.01270    0.01301    0.00904
AFIX  43
H64   2    0.215034    0.250316    1.011226    11.00000   -1.20000
AFIX   0
C65   1    0.375913    0.240782    0.991464    11.00000    0.02886    0.03046 =
         0.02163   -0.01161    0.00274    0.00334
AFIX  43
H65   2    0.422804    0.270290    1.016754    11.00000   -1.20000
AFIX   0
C74   1    0.521571   -0.104699    0.924094    11.00000    0.07272    0.03762 =
         0.02842    0.01137    0.00149   -0.02017
AFIX  43
H74   2    0.491242   -0.139134    0.942028    11.00000   -1.20000
AFIX   0
C75   1    0.585953   -0.057076    0.954359    11.00000    0.05963    0.03465 =
         0.01973    0.00699    0.00352   -0.00880
AFIX  43
H75   2    0.608811   -0.052381    0.996839    11.00000   -1.20000
AFIX   0
C84   1    1.032675    0.035180    0.902620    11.00000    0.02215    0.05415 =
         0.06224   -0.01174    0.00166    0.00875
AFIX  43
H84   2    1.109737    0.019192    0.912312    11.00000   -1.20000
AFIX   0
N85   4    0.944977    0.020808    0.931739    11.00000    0.03799    0.04530 =
         0.03937   -0.00362   -0.01050    0.01195
HKLF 4

REM  JUL167_3 in P21/n
REM R1 =  0.0385 for   16050 Fo > 4sig(Fo)  and  0.0606 for all   21345 data
REM    832 parameters refined using     30 restraints

END

WGHT      0.0379      0.0000

REM Highest difference peak  1.260,  deepest hole -1.537,  1-sigma level  0.188
Q1    1   0.5844  0.2106  0.9200  11.00000  0.05    1.26
Q2    1   0.4060 -0.0089  0.6802  11.00000  0.05    1.10
Q3    1   0.5277  0.0003  0.7858  11.00000  0.05    1.08
Q4    1  -0.0327  0.3085  0.8829  11.00000  0.05    1.07
Q5    1   0.6423  0.1784  0.9106  11.00000  0.05    1.07
;
_shelx_res_checksum              39062

_shelx_hkl_file                  
;
   1   0   0 0.13280 0.27886   2
   2   0   0 262.102 10.2451   1
   2   0   0 240.227 10.2962   2
  -2   0   0 266.260 10.2948   1
  -2   0   0 248.032 10.3038   2
   3   0   0 0.75878 0.94078   1
   3   0   0 0.91304 1.06700   2
  -3   0   0 -0.3200 0.90240   1
  -3   0   0 0.04850 0.85100   2
   4   0   0 9.99603 2.22816   2
  -4   0   0 17.7945 2.89534   2
   4   0   0 19.9449 3.09605   1
  -4   0   0 17.9577 2.83782   1
   5   0   0 -0.6802 1.37557   2
   5   0   0 6.42999 3.18807   1
  -5   0   0 -0.5208 1.42821   1
   6   0   0 3098.24 108.034   1
   6   0   0 3234.73 109.263   2
  -6   0   0 3136.95 107.990   1
   7   0   0 1.79630 2.28802   2
  -7   0   0 0.32882 2.07056   1
  -8   0   0 3.17165 2.63968   1
   8   0   0 0.41499 2.56772   2
  -9   0   0 0.45462 2.79303   1
   9   0   0 -0.7619 2.11867   2
 -10   0   0 1837.27 68.9533   1
  10   0   0 1781.21 70.7908   2
 -11   0   0 -1.5387 3.03669   1
  11   0   0 -1.0135 3.80412   2
  12   0   0 762.489 39.4368   2
 -12   0   0 838.713 37.8759   1
  13   0   0 5.08851 4.77267   2
 -14   0   0 72.7838 13.2030   1
  14   0   0 81.4719 11.9526   2
  15   0   0 -1.5866 6.16840   2
 -15   0   0 -4.6407 7.34235   1
  16   0   0 18.3322 9.20882   2
  17   0   0 10.0863 10.1823   2
 -17   0   0 -7.7495 11.1463   1
  -1   1   0 9023.64 299.756   3
   2  -1   0 582.242 21.5504   1
  -2  -1   0 572.539 21.2363   2
  -2  -1   0 598.284 20.3744   1
  -2   1   0 576.362 21.2016   2
  -2   1   0 587.053 21.5942   1
   2   1   0 604.244 21.3698   2
   2   1   0 585.838 20.4152   1
   3  -1   0 556.961 21.6793   1
  -3  -1   0 532.503 21.3264   2
  -3  -1   0 544.307 20.4313   1
   3  -1   0 598.212 21.6852   2
   3   1   0 555.975 20.5996   1
   3   1   0 577.634 21.6514   2
  -3   1   0 557.365 21.7157   1
  -4  -1   0 728.829 26.9868   1
   4  -1   0 757.507 28.2371   2
   4  -1   0 694.311 27.9978   1
   4   1   0 736.247 27.1194   1
   4   1   0 751.367 28.2808   2
  -4   1   0 731.762 28.1845   1
  -4   1   0 715.941 27.9431   2
   5  -1   0 145.724 9.10612   2
   5  -1   0 146.064 9.26555   1
  -5  -1   0 133.298 8.11690   1
   5   1   0 144.837 9.12801   2
   5   1   0 148.428 8.51134   1
  -5   1   0 128.979 8.77635   1
   6  -1   0 7.56492 2.87041   1
  -6  -1   0 5.47227 2.07972   1
   6  -1   0 2.00133 2.30148   2
  -6  -1   0 9.30508 2.66842   1
   6   1   0 5.70172 2.30624   1
   6   1   0 4.77930 2.09176   2
  -6   1   0 6.32051 2.81260   1
  -7  -1   0 493.634 21.8794   1
  -7  -1   0 463.961 20.9640   1
   7  -1   0 501.529 23.4733   2
   7   1   0 530.803 23.7436   2
  -7   1   0 465.863 22.6962   1
  -8  -1   0 47.5753 6.03660   1
   8  -1   0 62.7047 7.47799   2
  -8   1   0 59.9995 7.21350   1
   8   1   0 47.3621 6.65741   2
   9  -1   0 503.781 25.9014   2
   9   1   0 506.447 25.8386   2
  -9   1   0 478.047 24.3503   1
  10  -1   0 7.36200 3.87091   2
 -10  -1   0 6.34564 3.88046   1
 -10   1   0 8.52630 3.47589   1
  10   1   0 2.21106 3.02924   2
  11  -1   0 3.04730 5.17913   2
 -11  -1   0 5.50536 4.73313   1
 -11   1   0 -3.3112 2.97199   1
  11   1   0 1.54125 5.85123   2
  12  -1   0 27.3744 8.66098   2
 -12  -1   0 27.2923 7.52487   1
 -12   1   0 49.6987 10.5072   1
  12   1   0 31.1672 8.86272   2
  13  -1   0 112.117 14.2568   2
  13   1   0 131.472 14.6411   2
 -14  -1   0 55.2436 10.4288   1
  14  -1   0 41.6477 9.39341   2
  14   1   0 51.0101 10.5303   2
 -14   1   0 32.6078 10.0016   1
  15  -1   0 3.58165 7.52275   2
 -15  -1   0 3.60008 7.94978   1
 -15   1   0 19.3757 10.0687   1
  15   1   0 2.60572 6.14241   2
  16  -1   0 17.3521 9.35977   2
 -16  -1   0 28.0783 10.5330   1
 -16   1   0 23.6575 10.6448   1
  16   1   0 25.7336 10.8885   2
  17  -1   0 11.7235 9.35501   2
  17   1   0 9.56361 8.87574   2
   0  -2   0 414.631 14.6908   2
  -1  -2   0 9.31725 1.27448   2
   1  -2   0 11.1401 1.63559   1
   1  -2   0 10.3384 1.36144   2
  -1   2   0 9.58190 1.28876   2
   1   2   0 10.8224 1.29914   2
  -1   2   0 10.5945 1.54274   1
  -2  -2   0 520.529 16.9358   1
  -2  -2   0 489.353 18.6756   2
   2  -2   0 489.013 19.2834   1
   2  -2   0 511.473 18.7666   2
   2   2   0 505.141 18.7723   2
  -2   2   0 507.889 19.4122   1
  -2   2   0 475.454 18.5093   2
  -3  -2   0 389.766 16.5936   2
  -3  -2   0 403.387 14.9953   1
   3  -2   0 419.449 16.7743   2
   3  -2   0 409.033 17.2809   1
   3   2   0 431.557 15.2569   1
   3   2   0 412.191 16.7894   2
  -3   2   0 420.191 17.4380   1
  -3   2   0 393.604 16.4401   2
  -4  -2   0 751.984 26.6761   1
   4  -2   0 774.780 29.0015   2
  -4  -2   0 719.659 26.7983   1
   4  -2   0 716.398 30.5191   1
  -4   2   0 751.996 29.3717   1
   4   2   0 764.901 27.1787   1
  -4   2   0 724.619 28.5044   2
   4   2   0 778.604 29.0514   2
  -5  -2   0 85.7545 5.59599   1
  -5  -2   0 75.7489 5.22182   1
   5  -2   0 73.8408 6.73763   1
   5   2   0 71.1695 6.28980   2
  -5   2   0 89.0617 7.15549   1
  -6  -2   0 13.9107 3.06787   1
   6  -2   0 8.18482 3.14523   2
  -6  -2   0 7.67364 2.30962   1
  -6   2   0 3.42933 2.40515   1
   6   2   0 11.1706 3.49881   2
  -7  -2   0 268.076 13.5694   1
   7  -2   0 275.167 15.7910   2
  -7  -2   0 266.635 13.8464   1
  -7   2   0 299.062 18.2840   1
   7   2   0 286.581 16.0015   2
  -8  -2   0 59.0224 6.63889   1
  -8  -2   0 65.3242 6.61635   1
   8  -2   0 80.8982 8.26005   2
  -8   2   0 54.5563 7.66358   1
   8   2   0 57.0792 7.15838   2
  -9  -2   0 4.08813 2.94101   1
   9  -2   0 6.08999 3.22098   2
  -9   2   0 6.51019 3.98264   1
   9   2   0 5.75253 3.61117   2
  10  -2   0 -0.3813 3.71877   2
 -10  -2   0 4.16789 3.66552   1
  10   2   0 2.39702 3.38925   2
 -10   2   0 0.34384 3.52966   1
 -11  -2   0 1.42656 3.85627   1
 -11   2   0 5.07633 5.32334   1
  12  -2   0 -2.8017 4.15670   2
  12   2   0 0.30627 4.06643   2
 -12   2   0 -1.1769 4.92451   1
 -13  -2   0 17.0629 7.25633   1
  13  -2   0 4.49944 4.58996   2
  13   2   0 14.3776 6.10590   2
 -13   2   0 5.47722 6.73652   1
  14  -2   0 165.709 16.7966   2
 -14  -2   0 149.152 15.1167   1
  14   2   0 169.677 17.2840   2
 -14   2   0 196.950 18.0598   1
  15  -2   0 6.38158 7.08811   2
 -15  -2   0 22.3136 8.02289   1
 -15   2   0 15.2782 8.94172   1
  15   2   0 4.72324 7.61340   2
  16  -2   0 -1.0134 6.46975   2
 -16  -2   0 1.33939 9.85291   1
  16   2   0 0.46365 7.45321   2
 -16   2   0 -19.884 8.06176   1
  17  -2   0 5.97121 8.94245   2
 -17   2   0 16.7767 13.2760   1
  17   2   0 11.6760 8.31964   2
   0  -3   0 0.54522 0.62704   1
   0  -3   0 0.97278 0.75780   2
   0   3   0 0.27387 0.49190   2
   0   3   0 1.21627 0.71549   1
   1  -3   0 180.963 8.67017   1
  -1  -3   0 200.512 7.05648   1
   1  -3   0 192.529 8.23341   2
  -1   3   0 199.250 8.27754   2
   1   3   0 183.149 7.21523   1
   1   3   0 200.839 8.37841   2
  -1   3   0 174.892 8.60347   1
  -2  -3   0 398.421 16.3145   2
   2  -3   0 421.600 16.3938   2
   2  -3   0 419.790 17.2199   1
  -2   3   0 439.419 16.4151   2
  -2   3   0 404.464 17.1449   1
   2   3   0 425.453 16.4673   2
   3  -3   0 966.311 35.8060   1
  -3  -3   0 1015.38 32.0085   1
   3  -3   0 961.000 34.7991   2
  -3  -3   0 911.493 31.9585   1
   3   3   0 927.133 34.7992   2
  -3   3   0 973.233 35.9634   1
   4  -3   0 55.1669 5.47582   1
  -4  -3   0 53.8887 4.99003   2
   4  -3   0 56.9271 5.01930   2
  -4  -3   0 54.7049 3.52990   1
  -4  -3   0 59.3025 3.55335   1
  -4   3   0 59.7223 5.59874   1
   4   3   0 60.4162 5.13533   2
  -5  -3   0 103.951 5.66964   1
  -5  -3   0 92.7272 5.62549   1
   5  -3   0 88.6783 7.76729   1
  -5   3   0 102.846 8.27075   1
   6  -3   0 98.9830 8.20873   2
  -6  -3   0 97.5693 6.12828   1
  -6  -3   0 100.464 6.42817   1
  -6   3   0 96.3107 8.68697   1
  -7  -3   0 158.419 9.47155   1
   7  -3   0 179.226 11.9899   2
  -7   3   0 164.050 12.2215   1
   7   3   0 161.739 11.6187   2
  -8  -3   0 380.789 17.3952   1
   8  -3   0 367.717 20.5414   2
  -8  -3   0 380.360 17.8578   1
   8   3   0 402.205 21.0664   2
  -8   3   0 397.102 21.2192   1
   9  -3   0 21.4840 5.54781   2
  -9  -3   0 32.0796 5.55902   1
   9   3   0 33.7669 7.40710   2
  -9   3   0 29.9095 7.30561   1
 -10  -3   0 30.6903 6.11902   1
  10  -3   0 28.2144 8.03379   2
 -10   3   0 31.9997 6.67578   1
  10   3   0 40.5518 7.55581   2
  11  -3   0 1.99969 3.94981   2
 -11  -3   0 1.14071 3.30179   1
 -11   3   0 -2.6518 3.32087   1
  11   3   0 0.83034 4.43982   2
 -12  -3   0 -3.0589 4.08163   1
  12  -3   0 3.21197 4.45617   2
 -12   3   0 8.86024 5.44528   1
  12   3   0 1.81915 4.73066   2
  13  -3   0 394.120 26.6750   2
 -13  -3   0 408.634 22.3662   1
 -13   3   0 385.893 25.9510   1
  13   3   0 408.294 26.6564   2
 -14  -3   0 51.8079 9.49118   1
  14  -3   0 57.8543 12.3305   2
  14   3   0 57.9099 13.7239   2
  15  -3   0 9.01112 7.21074   2
 -15  -3   0 12.0532 7.96130   1
 -15   3   0 28.2486 10.1803   1
  15   3   0 2.07561 7.37737   2
 -16  -3   0 7.12899 10.0035   1
  16  -3   0 18.0952 8.85044   2
  16   3   0 6.97371 6.70720   2
 -16   3   0 34.8457 12.6570   1
  17  -3   0 41.5293 13.6082   2
  17   3   0 31.2834 9.26591   2
 -17   3   0 42.2451 14.9141   1
   0  -4   0 657.659 23.3871   2
   0  -4   0 641.385 23.1221   1
   0   4   0 634.050 23.0804   1
   0   4   0 628.773 23.1429   2
  -1  -4   0 359.441 12.8281   1
   1  -4   0 344.267 14.5958   1
  -1  -4   0 346.551 14.1269   2
   1  -4   0 356.503 14.1070   2
  -1   4   0 362.359 14.0421   2
   1   4   0 344.591 14.0783   2
  -1   4   0 343.802 14.6494   1
   1   4   0 354.614 12.7645   1
   2  -4   0 4308.82 138.620   2
   2  -4   0 4140.94 139.563   1
   2   4   0 4086.58 138.505   2
  -2   4   0 4116.30 139.687   1
  -2   4   0 4306.11 138.493   2
   3  -4   0 314.044 15.2881   1
  -3   4   0 321.451 15.4994   1
  -3   4   0 313.721 14.1725   2
   3   4   0 353.462 14.7877   2
  -4  -4   0 192.431 7.78365   1
  -4  -4   0 218.654 7.86581   1
   4  -4   0 214.251 11.0759   2
  -4  -4   0 207.799 11.0847   2
   4  -4   0 198.959 11.7145   1
   4   4   0 188.194 10.7243   2
  -4   4   0 205.728 11.9655   1
  -4   4   0 193.740 10.6770   2
  -5  -4   0 403.920 15.5234   1
  -5  -4   0 417.037 15.4104   1
   5  -4   0 411.899 19.0763   2
  -5   4   0 411.398 20.1242   1
   6  -4   0 172.034 11.2740   2
  -6  -4   0 184.207 8.55508   1
  -6  -4   0 173.262 8.54326   1
   6   4   0 159.193 11.0525   2
  -7  -4   0 956.030 34.8707   1
  -7  -4   0 949.772 35.2228   1
  -7   4   0 987.548 40.7645   1
  -8  -4   0 1327.51 48.0532   1
   8  -4   0 1350.76 52.8642   2
  -8  -4   0 1368.55 48.9184   1
  -8   4   0 1286.85 53.3643   1
   8   4   0 1298.01 52.6050   2
   9  -4   0 254.457 17.7105   2
  -9  -4   0 285.831 14.4560   1
   9   4   0 284.551 17.8303   2
  -9   4   0 276.601 18.3881   1
  10  -4   0 5.79694 3.67194   2
 -10  -4   0 10.9206 3.74675   1
  10   4   0 1.89625 3.11374   2
 -10   4   0 8.63548 5.35433   1
 -11  -4   0 253.507 15.0588   1
  11  -4   0 285.504 19.7112   2
 -11   4   0 244.864 18.9097   1
  11   4   0 251.207 18.6202   2
 -12  -4   0 374.687 20.6803   1
  12  -4   0 367.910 25.0265   2
  12   4   0 368.656 24.6959   2
 -12   4   0 373.254 24.2793   1
  13  -4   0 62.3382 12.0599   2
 -13  -4   0 80.0835 10.2418   1
 -13   4   0 71.1803 12.8548   1
  13   4   0 100.954 13.4127   2
  14  -4   0 24.7347 8.60248   2
 -14  -4   0 16.9479 6.30931   1
 -14   4   0 -1.9910 5.63895   1
  14   4   0 -0.0662 6.64419   2
  15  -4   0 29.7825 9.39215   2
 -15  -4   0 18.3540 7.71517   1
  15   4   0 21.6274 9.83479   2
  16  -4   0 17.2849 9.48788   2
 -16   4   0 16.8231 10.1698   1
  16   4   0 6.37583 7.47855   2
  17  -4   0 -2.2310 9.42979   2
 -17   4   0 -0.8736 12.1563   1
  17   4   0 9.20759 9.73906   2
   0  -5   0 -0.4863 0.84685   1
   0  -5   0 0.33670 0.94426   2
   0   5   0 -0.6449 0.97558   2
   0   5   0 0.83158 0.89238   1
  -1  -5   0 1121.78 37.9589   1
   1  -5   0 1120.09 39.3614   2
   1  -5   0 1088.73 39.8853   1
   1   5   0 1119.16 39.4118   2
   1   5   0 1133.19 37.9406   1
  -1   5   0 1093.14 39.9891   1
  -1   5   0 1106.39 39.2273   2
  -2  -5   0 1591.38 58.6116   2
   2  -5   0 1667.61 56.1791   2
   2   5   0 1618.86 56.1846   2
   2   5   0 1571.42 52.8808   1
  -2   5   0 1605.00 57.3219   1
  -2   5   0 1636.98 57.7144   2
   3  -5   0 594.970 23.5650   2
  -3  -5   0 578.228 23.5218   2
   3  -5   0 561.005 24.5638   1
  -3   5   0 627.917 25.2511   1
  -3   5   0 583.795 23.2921   2
   4  -5   0 0.49194 1.09196   2
   4   5   0 2.12393 1.65246   2
  -4   5   0 0.62417 1.61172   1
   5  -5   0 767.317 31.3761   2
  -5  -5   0 747.062 25.0300   1
  -5   5   0 687.380 31.2457   1
  -6  -5   0 76.9588 4.73970   1
  -6  -5   0 89.0970 4.83506   1
   6  -5   0 87.2231 7.86068   2
   6   5   0 91.2759 7.81935   2
  -6   5   0 70.6634 8.09080   1
  -7  -5   0 536.165 20.5538   1
  -7  -5   0 531.928 20.3546   1
   7  -5   0 568.209 25.7920   2
  -7   5   0 519.703 26.5553   1
   7   5   0 522.455 25.2702   2
   8  -5   0 4.68832 2.87023   2
  -8  -5   0 1.67159 1.99209   1
  -8  -5   0 -1.9072 2.17396   1
  -8   5   0 4.44699 3.68442   1
   8   5   0 2.71867 2.31329   2
  -9  -5   0 5.91961 4.32617   1
  -9  -5   0 2.90335 2.22006   1
   9  -5   0 -2.2881 2.72780   2
  -9   5   0 1.82460 3.02437   1
   9   5   0 -0.5043 2.46002   2
 -10  -5   0 88.9615 7.93254   1
  10  -5   0 97.3124 11.2828   2
  10   5   0 83.3106 9.81216   2
 -10   5   0 81.9937 10.7788   1
 -11  -5   0 87.5167 8.00034   1
  11  -5   0 107.685 11.5038   2
 -11  -5   0 53.2743 8.90162   1
  11   5   0 73.3126 10.8346   2
 -11   5   0 80.6532 11.4335   1
  12  -5   0 276.287 20.6081   2
 -12  -5   0 208.061 13.2108   1
  12   5   0 215.254 18.6292   2
 -12   5   0 192.105 17.9285   1
 -13  -5   0 6.86972 4.72195   1
  13  -5   0 7.18146 6.59842   2
  13   5   0 -2.9266 4.82854   2
 -13   5   0 6.08613 6.85948   1
  14  -5   0 -4.7686 4.71244   2
  14   5   0 -0.2077 5.71708   2
 -14   5   0 -8.6572 6.38319   1
  15  -5   0 40.7958 10.8628   2
  15   5   0 48.8331 10.6528   2
  16  -5   0 9.63696 8.89997   2
  16   5   0 27.1164 9.01746   2
 -16   5   0 25.1737 12.5398   1
  17  -5   0 -5.4925 9.34164   2
  17   5   0 -2.3127 8.23444   2
 -17   5   0 7.48307 12.3760   1
   0  -6   0 470.042 18.8726   1
   0  -6   0 481.509 19.2786   2
   0   6   0 495.063 19.0588   1
   0   6   0 458.875 18.8842   2
   1  -6   0 138.618 7.75296   2
  -1  -6   0 142.933 8.01641   2
   1  -6   0 131.519 8.09560   1
  -1  -6   0 130.110 6.66149   1
  -1   6   0 133.866 9.92658   2
   1   6   0 137.876 6.78968   1
  -1   6   0 133.967 8.18640   1
   2  -6   0 2978.88 97.6500   2
  -2  -6   0 2949.76 94.4229   1
   2  -6   0 2750.62 98.3665   1
   2   6   0 2840.21 94.2061   1
  -2   6   0 2891.02 97.2627   2
   2   6   0 2888.60 97.5535   2
  -2   6   0 2877.85 98.8094   1
   2   6   0 2861.20 97.6088   2
   3  -6   0 712.172 27.2617   2
  -3  -6   0 684.936 27.1765   2
   3  -6   0 651.037 28.2076   1
  -3   6   0 689.070 28.6875   1
  -3   6   0 680.986 26.8274   2
   4  -6   0 49.9954 5.21303   2
  -4   6   0 47.4611 5.77686   1
   5  -6   0 14.0193 3.93705   2
   5   6   0 5.94931 2.03674   2
  -5   6   0 2.17240 2.04845   1
  -6  -6   0 173.915 6.80017   1
   6  -6   0 183.832 11.7527   2
  -6  -6   0 160.235 6.77843   1
  -6   6   0 156.722 12.3899   1
  -7  -6   0 73.2781 4.51484   1
   7  -6   0 81.1848 8.51114   2
  -7  -6   0 70.4814 4.30343   1
  -7   6   0 80.5950 9.35583   1
   7   6   0 65.9480 7.51469   2
   8  -6   0 740.351 33.6276   2
  -8  -6   0 723.181 26.9987   1
  -8  -6   0 756.302 26.9640   1
   8   6   0 744.570 33.7092   2
  -8   6   0 757.666 35.5195   1
   9  -6   0 354.195 21.0901   2
  -9  -6   0 349.944 15.0137   1
  -9  -6   0 357.830 14.9699   1
  -9   6   0 337.460 21.7664   1
   9   6   0 359.284 21.0604   2
  10  -6   0 30.8718 7.38670   2
 -10  -6   0 32.8755 5.40979   1
 -10   6   0 41.6417 9.17681   1
  10   6   0 35.7213 7.06480   2
 -11  -6   0 17.9890 4.74883   1
 -11  -6   0 23.8657 4.65279   1
  11  -6   0 16.8322 5.44565   2
  11   6   0 8.09552 5.27171   2
 -11   6   0 34.3425 9.30594   1
 -12  -6   0 -2.0871 3.31815   1
  12  -6   0 9.99681 5.71393   2
 -12  -6   0 4.54027 4.96702   1
 -12   6   0 13.6758 6.38898   1
  12   6   0 3.62340 5.01492   2
 -13  -6   0 4.54263 4.37446   1
  13  -6   0 2.21182 5.24413   2
 -13   6   0 4.04984 6.23261   1
  13   6   0 -1.1548 4.25483   2
  14  -6   0 44.8034 11.7780   2
 -14  -6   0 23.5814 6.07895   1
  14   6   0 31.2810 9.43776   2
 -14   6   0 31.8324 10.5513   1
  15  -6   0 39.9381 11.5283   2
 -15   6   0 42.7625 13.6613   1
  15   6   0 30.9011 10.1188   2
  16  -6   0 105.037 17.4852   2
  16   6   0 106.054 17.7561   2
 -16   6   0 50.5090 15.2075   1
  17  -6   0 4.02220 9.27298   2
 -17   6   0 2.85925 11.4087   1
  17   6   0 5.44197 7.85975   2
   0  -7   0 1.20551 1.36742   2
   0  -7   0 0.91743 1.22443   1
   0   7   0 -0.3708 0.82970   1
   0   7   0 0.38165 1.39298   2
   1  -7   0 31.6016 3.80835   2
   1  -7   0 28.6461 3.91916   1
  -1  -7   0 24.7380 3.61635   2
  -1  -7   0 30.0492 3.15755   1
  -1   7   0 31.3081 3.92254   1
  -1   7   0 31.5845 3.64324   2
   1   7   0 28.0401 3.69931   2
   1   7   0 29.2713 3.08282   1
   2  -7   0 1481.45 54.1289   1
   2  -7   0 1490.39 52.9156   2
  -2  -7   0 1485.77 50.0015   1
  -2   7   0 1476.02 54.2812   1
   2   7   0 1437.53 49.7698   1
   2   7   0 1525.59 53.1430   2
  -2   7   0 1494.48 52.7372   2
   2   7   0 1462.55 53.0643   2
   3  -7   0 534.141 22.9833   2
   3   7   0 556.244 23.2885   2
   3   7   0 551.075 18.3203   1
  -3   7   0 547.883 24.7289   1
   4  -7   0 449.287 20.3432   2
   4   7   0 445.521 20.7744   2
  -4   7   0 438.594 22.1789   1
  -5   7   0 236.016 15.0352   1
   5   7   0 219.811 13.2330   2
   6  -7   0 56.0003 6.87315   2
  -6   7   0 60.9991 7.91288   1
   6   7   0 49.5563 6.09664   2
   7  -7   0 92.1179 9.12136   2
  -7   7   0 112.443 11.2288   1
   7   7   0 83.1308 8.51041   2
   8  -7   0 9.98701 3.72181   2
  -8  -7   0 5.89834 1.40397   1
  -8   7   0 14.9018 5.37733   1
   8   7   0 5.69074 2.85657   2
  -9  -7   0 8.19415 1.84027   1
  -9  -7   0 9.90682 1.93736   1
   9  -7   0 10.8192 4.41843   2
   9   7   0 9.15330 3.51360   2
  -9   7   0 9.15417 4.13705   1
 -10  -7   0 18.6542 3.57225   1
  10  -7   0 10.1293 5.36296   2
 -10  -7   0 21.2321 3.49570   1
 -10   7   0 23.8674 7.65616   1
  10   7   0 20.3081 6.41962   2
  11  -7   0 1.40908 4.09859   2
 -11  -7   0 0.77735 2.77228   1
 -11  -7   0 1.35671 2.50428   1
 -11   7   0 -4.2027 4.03420   1
  11   7   0 4.53132 4.01832   2
 -12  -7   0 396.722 16.5695   1
  12  -7   0 398.756 26.1211   2
  12   7   0 458.964 27.4865   2
 -12   7   0 432.971 32.9319   1
  13  -7   0 89.0516 13.3976   2
 -13  -7   0 90.3605 6.46126   1
 -13   7   0 101.393 15.5867   1
  13   7   0 91.8029 13.2845   2
  14  -7   0 5.53833 6.44119   2
  14   7   0 2.83864 6.95289   2
 -14   7   0 0.68076 7.14850   1
  15  -7   0 40.5722 10.9112   2
  15   7   0 42.2322 11.1475   2
 -15   7   0 34.7913 12.7226   1
  16  -7   0 96.8383 16.8768   2
  16   7   0 81.7982 16.6878   2
  17   7   0 24.6478 10.6082   2
 -17   7   0 29.1886 11.8183   1
   0  -8   0 46.3903 4.87410   2
   0  -8   0 55.2173 5.01286   1
   0   8   0 47.8944 4.87783   2
   0   8   0 44.4119 4.58181   1
   1  -8   0 1307.43 46.0517   2
   1  -8   0 1206.39 46.1770   1
  -1  -8   0 1272.48 44.4250   1
  -1  -8   0 1304.24 46.1889   2
  -1   8   0 1228.04 45.4867   2
   1   8   0 1228.68 45.7450   2
   1   8   0 1279.26 44.3005   1
  -1   8   0 1202.82 46.2392   1
   2  -8   0 1808.56 62.9220   2
  -2  -8   0 1748.25 59.7195   1
   2  -8   0 1709.31 63.6848   1
   2   8   0 1758.44 63.0030   2
  -2   8   0 1833.22 66.5854   2
   2   8   0 1749.21 59.5242   1
  -2   8   0 1751.67 64.1128   1
   3  -8   0 108.383 7.85522   2
   3   8   0 99.6828 4.41673   1
  -3   8   0 105.933 8.71237   1
   3   8   0 87.9867 4.31203   1
   3   8   0 90.8028 7.22744   2
   4  -8   0 506.482 22.7832   2
  -4   8   0 520.020 24.7965   1
   4   8   0 493.445 22.7725   2
   5  -8   0 219.978 13.2315   2
  -5   8   0 198.701 14.3921   1
   5   8   0 216.063 13.1723   2
   6  -8   0 177.683 12.3407   2
   6   8   0 166.490 11.9900   2
  -6   8   0 186.660 14.1160   1
   7  -8   0 748.392 34.1158   2
   7   8   0 758.121 33.9808   2
  -7   8   0 817.350 37.1826   1
   8  -8   0 104.699 10.5033   2
   8   8   0 107.957 10.0423   2
  -8   8   0 87.2523 11.2178   1
   9  -8   0 1168.39 49.1120   2
  -9   8   0 1108.46 50.6877   1
   9   8   0 1136.13 48.6218   2
  10  -8   0 29.5192 8.35958   2
 -10   8   0 38.1565 9.93162   1
  10   8   0 18.1005 5.18260   2
  11  -8   0 798.670 40.3899   2
 -11   8   0 858.897 42.4471   1
  11   8   0 805.764 40.0340   2
  12  -8   0 13.0494 6.17908   2
  12   8   0 18.7511 6.45053   2
 -12   8   0 24.4559 8.88313   1
  13  -8   0 112.167 14.9964   2
  13   8   0 100.410 13.8557   2
 -13   8   0 105.686 16.2253   1
  14  -8   0 85.7313 14.4166   2
 -14   8   0 78.7099 15.5195   1
  14   8   0 45.3006 11.3009   2
  15  -8   0 26.4893 11.6168   2
 -15   8   0 -0.1896 9.67168   1
  16  -8   0 -1.2411 7.93280   2
  16   8   0 7.52033 7.80982   2
  17   8   0 27.2099 11.9544   2
 -17   8   0 35.7074 16.1302   1
   0  -9   0 0.42527 1.93323   1
   0  -9   0 0.51324 1.14533   2
   0   9   0 1.80016 1.29982   1
   1  -9   0 349.498 16.7030   2
   1  -9   0 335.832 16.9121   1
  -1  -9   0 345.599 15.4097   1
  -1  -9   0 346.995 16.7052   2
  -1   9   0 351.047 17.0724   1
   1   9   0 360.726 15.3805   1
  -2  -9   0 510.978 19.5357   1
   2  -9   0 502.179 22.0259   2
   2   9   0 501.950 19.3035   1
   2   9   0 498.414 22.2138   2
  -2   9   0 479.682 22.9798   1
   3  -9   0 264.266 16.1948   2
   3   9   0 259.567 14.4766   2
   3   9   0 261.269 10.0932   1
   3   9   0 230.681 9.83760   1
   4  -9   0 420.254 20.5112   2
   4   9   0 429.334 20.7633   2
  -4   9   0 446.479 22.7956   1
   5  -9   0 650.062 29.1593   2
  -5   9   0 639.365 31.2408   1
   5   9   0 707.467 29.8083   2
   6  -9   0 105.821 9.53277   2
  -6   9   0 86.0425 10.0055   1
   6   9   0 115.641 9.80853   2
   7  -9   0 0.64150 2.35861   2
   7   9   0 3.47773 3.09256   2
  -7   9   0 3.27836 3.46349   1
   8  -9   0 236.463 16.5525   2
  -8   9   0 268.468 19.3216   1
   8   9   0 268.709 17.3606   2
   9  -9   0 44.3440 7.89814   2
  -9   9   0 39.8050 9.68357   1
   9   9   0 42.3336 7.76158   2
  10   9   0 611.521 36.1992   2
 -10   9   0 632.059 34.6873   1
  11  -9   0 250.704 19.7952   2
  11   9   0 239.080 18.7060   2
 -11   9   0 233.599 23.7655   1
  12  -9   0 97.3802 13.2968   2
  12   9   0 67.1342 11.7073   2
 -12   9   0 83.5417 13.2554   1
  13  -9   0 16.2039 7.82572   2
 -13   9   0 16.7285 7.87153   1
  13   9   0 10.3075 6.52932   2
  14  -9   0 -6.5200 5.89241   2
  14   9   0 9.16658 7.97395   2
 -14   9   0 9.50669 8.24276   1
  15  -9   0 26.7309 9.50870   2
 -15   9   0 30.3039 11.6427   1
  15   9   0 32.6578 10.3476   2
  16  -9   0 2.38724 9.07204   2
  16   9   0 19.4275 9.60028   2
 -17   9   0 12.3062 13.0189   1
  17   9   0 13.8489 11.5177   2
   0 -10   0 58.5648 5.95105   1
   0 -10   0 66.5541 6.40602   2
   0  10   0 62.5331 6.02565   1
   1 -10   0 65.8838 6.44927   2
  -1 -10   0 69.3379 6.36865   2
  -1  10   0 60.4752 6.21941   1
   1  10   0 66.0361 5.56223   1
  -2 -10   0 938.343 35.0126   1
   2 -10   0 971.886 38.6511   2
  -2  10   0 993.574 39.4807   1
   2  10   0 954.174 34.8310   1
   3 -10   0 5521.42 185.835   2
   3  10   0 5720.85 180.557   1
   3  10   0 5399.48 180.347   1
  -3  10   0 5440.70 187.906   1
   4 -10   0 120.184 9.57137   2
  -4  10   0 108.827 10.5672   1
   4  10   0 102.812 8.72828   2
   5 -10   0 626.190 28.7722   2
  -5  10   0 671.647 31.6618   1
   5  10   0 619.728 28.7537   2
   6 -10   0 1.28595 2.48732   2
   6  10   0 6.38465 3.61902   2
  -6  10   0 -1.1969 2.54359   1
   7 -10   0 131.515 11.1986   2
   7  10   0 109.220 10.2248   2
  -7  10   0 111.478 12.2201   1
   8 -10   0 114.853 11.1012   2
  -8  10   0 112.543 12.9265   1
   8  10   0 105.215 10.6656   2
   9 -10   0 979.668 44.5618   2
   9  10   0 1021.64 44.7671   2
  -9  10   0 984.192 47.5029   1
  10 -10   0 11.3836 5.67104   2
 -10  10   0 17.9416 5.88272   1
  10  10   0 13.0223 4.80508   2
  11 -10   0 4.77649 5.26928   2
  11  10   0 -1.6548 4.34150   2
 -11  10   0 -6.4120 3.89650   1
  12 -10   0 10.2175 5.75636   2
 -12  10   0 24.1312 9.54667   1
  12  10   0 18.8268 6.16780   2
  13 -10   0 49.9935 12.3846   2
  13  10   0 50.6693 10.9807   2
 -13  10   0 28.1932 8.98050   1
  14 -10   0 8.19639 7.15921   2
 -14  10   0 10.9415 8.63318   1
  14  10   0 -6.0698 5.17085   2
  15 -10   0 60.9570 14.4715   2
 -15  10   0 50.9601 15.1776   1
  15  10   0 52.5333 11.5865   2
  16 -10   0 15.5973 8.64197   2
  16  10   0 12.7999 8.62313   2
   0 -11   0 -0.8368 1.77845   1
   0 -11   0 2.69135 2.27860   2
   0  11   0 -1.6521 1.50423   1
   1 -11   0 98.1854 8.51947   2
  -1 -11   0 141.330 9.61639   2
  -1 -11   0 101.767 7.98688   1
   1  11   0 103.503 7.57455   1
  -1  11   0 109.181 8.80177   1
  -2 -11   0 503.003 20.9983   1
  -2 -11   0 533.594 24.0397   2
   2 -11   0 531.769 23.8762   2
  -2  11   0 503.059 24.4986   1
   2  11   0 513.899 20.7520   1
   2  11   0 494.320 23.7461   2
   3 -11   0 196.497 12.8887   2
  -3  11   0 227.296 14.8468   1
   3  11   0 208.774 13.2685   2
   3  11   0 202.758 9.55120   1
   3  11   0 206.976 9.68279   1
   4 -11   0 680.954 30.5548   2
   4  11   0 701.189 23.6557   1
  -4  11   0 726.156 33.4293   1
   4  11   0 694.703 23.7027   1
   4  11   0 663.453 30.3633   2
   5 -11   0 49.8105 7.06655   2
   5  11   0 42.8904 6.02515   2
  -5  11   0 49.9635 8.08836   1
   6 -11   0 122.765 10.8586   2
   6  11   0 133.724 11.0033   2
  -6  11   0 133.192 13.0470   1
   7 -11   0 2.84545 2.45352   2
  -7  11   0 -4.1952 2.55448   1
   7  11   0 -0.1686 1.66496   2
   8 -11   0 82.6514 9.98521   2
   8  11   0 96.1540 10.2847   2
  -8  11   0 93.2173 12.1214   1
   9 -11   0 66.8001 10.1100   2
   9  11   0 43.8919 8.26782   2
  -9  11   0 83.4491 12.1853   1
  10 -11   0 29.2849 8.16448   2
 -10  11   0 10.8456 7.20772   1
  10  11   0 23.2775 6.33730   2
  11 -11   0 48.2470 9.41457   2
  11  11   0 24.2444 7.65508   2
 -11  11   0 28.6800 9.09371   1
  12 -11   0 16.2573 7.15783   2
  12  11   0 6.68548 5.91953   2
 -12  11   0 -0.0089 6.68133   1
  13 -11   0 6.19584 6.84249   2
  13  11   0 -0.2347 5.59418   2
 -13  11   0 -2.7433 6.29143   1
  14 -11   0 47.5760 11.6199   2
  14  11   0 30.6437 9.82423   2
 -14  11   0 48.8204 14.6238   1
  15 -11   0 9.66418 8.98480   2
  15  11   0 17.6459 8.37805   2
 -15  11   0 33.9744 13.0113   1
  16 -11   0 14.7180 10.4416   2
  16  11   0 15.0493 10.1982   2
   0 -12   0 3308.51 113.697   2
   0  12   0 3196.88 112.297   1
  -1 -12   0 10.9789 2.70741   1
  -1 -12   0 3.59374 2.24036   2
   1 -12   0 3.86250 2.62402   2
   1  12   0 4.48802 2.23781   1
  -2 -12   0 24.4562 4.96586   1
  -2 -12   0 33.7633 5.57710   2
   2 -12   0 40.3851 5.89763   2
  -2  12   0 47.6875 5.88243   1
   2  12   0 41.7095 4.31809   1
   3 -12   0 1298.08 50.1002   2
  -3  12   0 1247.31 51.6277   1
   3  12   0 1297.78 44.8734   1
   3  12   0 1246.19 44.6990   1
   4 -12   0 335.403 18.3467   2
   4  12   0 308.683 12.1268   1
  -4  12   0 285.331 19.2458   1
   4  12   0 325.497 12.2260   1
   4  12   0 329.108 18.2124   2
   5 -12   0 1315.53 52.4922   2
  -5  12   0 1318.84 55.6458   1
   5  12   0 1328.90 52.8241   2
   6 -12   0 69.5046 8.35355   2
  -6  12   0 57.2246 9.00975   1
   6  12   0 46.0346 7.11761   2
   7 -12   0 96.4691 10.2121   2
  -7  12   0 101.824 12.3535   1
   7  12   0 113.594 10.8502   2
   8 -12   0 0.54594 2.85309   2
   8  12   0 3.04159 3.20139   2
  -8  12   0 2.76340 4.52691   1
   9 -12   0 376.927 30.4465   2
   9  12   0 372.621 33.4087   2
  -9  12   0 344.090 24.8547   1
  10 -12   0 247.116 19.5388   2
 -10  12   0 266.895 22.0817   1
  10  12   0 281.735 20.2937   2
  11 -12   0 9.58506 5.41861   2
 -11  12   0 -3.3846 5.95090   1
  11  12   0 0.84996 3.74329   2
  12 -12   0 39.3808 10.1835   2
 -12  12   0 31.4464 11.4901   1
  12  12   0 23.8752 8.68787   2
  13 -12   0 49.8461 10.8921   2
  13  12   0 53.4237 11.8612   2
 -13  12   0 50.5743 14.1982   1
  14 -12   0 13.0484 8.26544   2
 -14  12   0 20.7051 10.4096   1
  14  12   0 16.2354 8.65745   2
  15 -12   0 13.8790 9.05912   2
  15  12   0 7.83440 8.05271   2
 -15  12   0 12.0821 10.7494   1
  16 -12   0 31.0102 14.9987   2
  16  12   0 18.4282 10.4903   2
 -16  12   0 12.3333 12.5837   1
   0 -13   0 -0.4654 2.13285   2
   0  13   0 -0.2212 1.72298   1
  -1 -13   0 741.601 31.5240   2
  -1 -13   0 673.875 29.2885   1
   1 -13   0 723.571 31.4353   2
   1  13   0 675.279 28.8085   1
  -1  13   0 698.766 31.0659   1
  -2 -13   0 81.2073 8.01946   2
  -2 -13   0 61.1287 6.25754   1
   2 -13   0 60.2411 7.31703   2
   2  13   0 68.0517 5.95877   1
  -2  13   0 62.8124 7.57060   1
   3 -13   0 464.293 23.2450   2
   3  13   0 460.766 18.8626   1
  -3  13   0 453.259 24.6047   1
   3  13   0 458.080 18.8140   1
   3  13   0 447.847 23.2687   2
   4 -13   0 701.673 32.0243   2
   4  13   0 699.648 25.2838   1
  -4  13   0 705.899 34.4659   1
   4  13   0 706.666 25.2271   1
   5 -13   0 7.80164 3.38280   2
   5  13   0 17.6096 5.54429   2
  -5  13   0 8.66594 4.99422   1
   6 -13   0 6.64918 2.83599   2
  -6  13   0 3.20333 3.75377   1
   6  13   0 12.2293 4.01824   2
   7 -13   0 -0.2999 2.47653   2
   7  13   0 -0.9666 2.45880   2
   8 -13   0 179.822 15.5802   2
  -8  13   0 180.876 17.6336   1
   8  13   0 158.557 14.3327   2
   9 -13   0 213.292 17.3446   2
   9  13   0 244.526 18.3092   2
  -9  13   0 217.015 19.8067   1
  10 -13   0 266.950 19.9073   2
 -10  13   0 251.386 21.7077   1
  10  13   0 211.073 17.9144   2
  11 -13   0 194.362 17.7321   2
 -11  13   0 191.634 20.6748   1
  11  13   0 171.057 16.6069   2
  12 -13   0 37.7108 9.29668   2
 -12  13   0 54.0758 12.2697   1
  12  13   0 36.6385 9.91373   2
  13 -13   0 39.2315 10.6979   2
  13  13   0 54.5139 11.9196   2
 -13  13   0 21.7529 10.2609   1
  14 -13   0 28.1550 11.0792   2
  14  13   0 19.6031 17.3184   2
 -14  13   0 42.8842 14.9761   1
  15 -13   0 12.1587 9.85028   2
 -15  13   0 6.07028 13.0311   1
  15  13   0 -0.3563 7.80952   2
 -16  13   0 -10.116 10.8841   1
  16  13   0 6.07445 8.88138   2
   0 -14   0 3172.31 112.120   2
   0  14   0 3143.16 110.758   1
  -1 -14   0 49.4108 6.83408   2
   1 -14   0 56.9527 7.37837   2
  -1  14   0 44.5720 6.62505   1
   1  14   0 58.6835 6.32119   1
  -2 -14   0 768.676 34.5272   2
   2 -14   0 770.068 34.4860   2
   2  14   0 773.102 31.1206   1
   2  14   0 789.246 31.0732   1
  -2  14   0 797.892 35.5748   1
   3 -14   0 43.2089 6.71963   2
  -3  14   0 37.1918 7.12823   1
   3  14   0 45.3201 6.70403   2
   3  14   0 45.2522 4.68833   1
   4 -14   0 301.285 17.9891   2
   4  14   0 284.237 17.9843   2
   4  14   0 310.875 12.5709   1
   4  14   0 287.211 12.4576   1
  -4  14   0 278.657 19.2630   1
   5 -14   0 13.4641 4.51723   2
  -5  14   0 30.5681 8.00212   1
   5  14   0 20.9464 5.62356   2
   6 -14   0 226.953 15.9736   2
  -6  14   0 260.240 19.8622   1
   6  14   0 198.906 15.3928   2
   7 -14   0 61.8044 9.16549   2
   7  14   0 73.6075 9.61725   2
  -7  14   0 77.9211 11.9757   1
   8 -14   0 74.0424 10.6844   2
   8  14   0 50.1618 9.58251   2
  -8  14   0 56.1048 10.8613   1
   9 -14   0 236.371 18.7923   2
   9  14   0 240.609 18.9280   2
  -9  14   0 242.879 21.4203   1
  10 -14   0 442.205 27.6983   2
 -10  14   0 456.694 30.6900   1
  10  14   0 433.369 27.3450   2
  11 -14   0 27.7326 6.85431   2
 -11  14   0 23.2359 8.52580   1
  11  14   0 22.6609 7.98422   2
  12 -14   0 107.701 15.4375   2
  12  14   0 135.389 16.0161   2
 -12  14   0 160.936 19.6132   1
  13 -14   0 65.2516 14.7325   2
 -13  14   0 52.1050 13.8860   1
  13  14   0 49.0341 12.3632   2
  14 -14   0 27.7708 9.59290   2
 -14  14   0 58.2853 16.1948   1
  14  14   0 58.1296 14.6822   2
  15 -14   0 -12.017 7.31656   2
  15  14   0 -0.8229 7.66771   2
  16  14   0 37.9681 12.8500   2
 -16  14   0 24.2464 13.5391   1
   0 -15   0 -0.3541 1.90076   2
   0  15   0 -1.0289 2.18117   1
   1 -15   0 24.6484 5.99424   2
  -1 -15   0 27.0476 5.63056   2
  -1  15   0 28.4550 6.42873   1
   1  15   0 37.9995 5.30643   1
   2 -15   0 130.476 11.2808   2
  -2 -15   0 126.368 11.3264   2
  -2  15   0 117.485 11.1118   1
   2  15   0 127.865 9.06447   1
   3 -15   0 278.822 17.2280   2
   3  15   0 237.364 12.9409   1
   3  15   0 259.618 17.0733   2
  -3  15   0 288.456 18.8391   1
   3  15   0 255.582 13.0217   1
   4 -15   0 94.9679 10.2453   2
   4  15   0 97.4284 6.33173   1
  -4  15   0 118.561 12.3964   1
   4  15   0 88.0054 9.78016   2
   4  15   0 100.015 6.33235   1
   5 -15   0 6.81697 3.07610   2
   5  15   0 11.5622 4.62630   2
  -5  15   0 10.4355 5.05387   1
   6 -15   0 67.8521 9.37235   2
   6  15   0 82.1251 9.67937   2
  -6  15   0 92.4745 12.2037   1
   7 -15   0 582.532 31.2704   2
  -7  15   0 645.495 35.8183   1
   7  15   0 568.732 31.1061   2
   8 -15   0 147.282 14.2008   2
   8  15   0 156.945 14.5969   2
  -8  15   0 143.511 17.0450   1
   9 -15   0 33.8800 8.24785   2
   9  15   0 48.3000 9.53737   2
  -9  15   0 57.1188 13.0991   1
  10 -15   0 21.6190 7.19644   2
  10  15   0 20.2311 7.39126   2
 -10  15   0 17.4102 8.56451   1
  11 -15   0 168.124 17.5651   2
 -11  15   0 172.313 21.0765   1
  11  15   0 149.933 16.0556   2
  12 -15   0 7.06697 6.64255   2
  12  15   0 2.19082 5.84275   2
 -12  15   0 -3.1912 6.98321   1
  13 -15   0 25.3392 10.0785   2
  13  15   0 16.8287 7.57016   2
 -13  15   0 32.0903 13.0349   1
  14 -15   0 18.3734 9.29170   2
  14  15   0 2.79799 6.43532   2
 -14  15   0 11.3265 20.0799   1
  15 -15   0 27.7010 11.1568   2
  15  15   0 24.9608 11.2592   2
 -15  15   0 45.2822 13.4521   1
   0 -16   0 44.3089 7.48070   2
   0  16   0 31.4646 5.77383   1
   1 -16   0 287.618 18.2762   2
  -1 -16   0 288.626 18.3561   2
   1  16   0 266.685 15.6737   1
  -1  16   0 274.742 17.6091   1
  -2 -16   0 539.275 27.0720   2
   2 -16   0 476.741 26.0827   2
   2  16   0 516.465 23.2954   1
  -2  16   0 502.116 26.9450   1
   3 -16   0 613.253 29.8529   2
  -3  16   0 581.909 30.7105   1
   3  16   0 579.230 24.4419   1
   3  16   0 584.170 25.4429   1
   3  16   0 570.900 29.3787   2
   4 -16   0 10.1925 3.94178   2
   4  16   0 10.0593 2.74343   1
   4  16   0 7.10707 3.69960   2
   4  16   0 6.37296 2.53754   1
  -4  16   0 11.3939 4.44126   1
   5 -16   0 482.505 26.3361   2
   5  16   0 457.217 16.6030   1
  -5  16   0 513.782 29.3328   1
   5  16   0 473.541 26.1749   2
   5  16   0 474.364 16.4975   1
   6 -16   0 1003.24 45.7287   2
   6  16   0 1027.58 46.2156   2
  -6  16   0 1045.04 49.9428   1
   7 -16   0 606.679 37.8186   2
   8 -16   0 666.967 35.2312   2
  -8  16   0 696.459 39.0924   1
   8  16   0 650.778 34.9235   2
   9 -16   0 21.2625 7.19489   2
   9  16   0 35.5772 9.58083   2
  -9  16   0 24.7750 8.93371   1
  10 -16   0 73.6829 11.9164   2
 -10  16   0 88.2098 14.5883   1
  10  16   0 95.6133 12.7841   2
  11 -16   0 14.3109 6.56612   2
 -11  16   0 3.60835 8.05406   1
  11  16   0 -1.1446 5.88144   2
  12 -16   0 50.7088 12.9832   2
 -12  16   0 46.9859 14.2203   1
  12  16   0 54.2575 13.7207   2
  13 -16   0 97.0260 19.3850   2
  13  16   0 58.3647 16.2547   2
 -13  16   0 95.1107 20.3116   1
  14 -16   0 11.1724 8.34901   2
 -14  16   0 2.78605 10.1024   1
  14  16   0 12.7880 7.53836   2
  15  16   0 3.18999 8.50594   2
 -15  16   0 19.4779 11.7107   1
   0 -17   0 -5.3602 2.39445   2
   0  17   0 3.74686 2.90741   1
  -1 -17   0 1167.55 48.9315   2
   1 -17   0 1173.80 49.0519   2
  -1  17   0 1084.63 47.6014   1
   1  17   0 1130.62 45.7592   1
   2 -17   0 628.983 32.1192   2
  -2 -17   0 678.937 32.7153   2
  -2  17   0 668.952 33.0699   1
   3 -17   0 338.045 20.8423   2
  -3  17   0 378.013 22.9717   1
   3  17   0 353.808 21.6491   2
   3  17   0 314.596 17.1512   1
   4 -17   0 118.863 11.7102   2
   4  17   0 107.652 7.48196   1
   4  17   0 108.213 11.5783   2
  -4  17   0 118.858 12.9199   1
   5 -17   0 262.768 18.8224   2
   5  17   0 270.043 10.7936   1
   5  17   0 309.643 20.0694   2
  -5  17   0 277.777 21.2501   1
   5  17   0 275.065 10.8111   1
   6 -17   0 22.7784 6.56877   2
  -6  17   0 10.1291 5.45842   1
   6  17   0 18.2827 5.83951   2
   7 -17   0 874.210 41.8733   2
  -7  17   0 901.584 45.8620   1
   7  17   0 799.640 40.8898   2
   8 -17   0 262.842 20.2190   2
  -8  17   0 338.007 25.5295   1
   8  17   0 279.372 21.2909   2
   9 -17   0 149.547 15.2520   2
   9  17   0 129.474 14.8823   2
  -9  17   0 107.943 15.8244   1
  10 -17   0 1.22174 3.99637   2
 -10  17   0 -4.6547 5.98425   1
  10  17   0 0.27086 4.19602   2
  11 -17   0 6.74308 5.12454   2
  11  17   0 24.9676 9.40411   2
 -11  17   0 28.3003 10.7470   1
  12 -17   0 17.8182 8.82287   2
  12  17   0 11.9136 7.44262   2
 -12  17   0 23.3380 9.64759   1
  13 -17   0 -0.7549 6.63882   2
  13  17   0 2.63647 6.66241   2
  14 -17   0 14.8505 10.8320   2
 -14  17   0 -1.0057 11.4970   1
  14  17   0 39.9362 11.7947   2
  15  17   0 32.0335 13.5394   2
 -15  17   0 42.2373 16.0943   1
   0 -18   0 313.896 20.6944   2
   0  18   0 332.137 19.5471   1
  -1 -18   0 344.579 21.1310   2
   1 -18   0 308.726 20.4903   2
  -1  18   0 280.902 19.2018   1
   1  18   0 323.728 18.5042   1
  -2 -18   0 887.959 39.9528   2
   2 -18   0 814.464 39.0881   2
   2  18   0 832.549 35.3225   1
  -2  18   0 835.359 39.7973   1
   3 -18   0 300.703 19.8795   2
   3  18   0 294.009 19.8554   2
  -3  18   0 283.828 20.3019   1
   4 -18   0 376.638 22.9154   2
  -4  18   0 350.524 24.0748   1
   4  18   0 402.544 23.7566   2
   4  18   0 349.785 16.5470   1
   5 -18   0 72.6076 10.7050   2
  -5  18   0 75.0142 11.5593   1
   5  18   0 83.2084 10.6357   2
   5  18   0 64.0862 4.57032   1
   5  18   0 58.8721 4.61713   1
   6 -18   0 7.12085 4.09985   2
  -6  18   0 8.14511 6.07306   1
   6  18   0 -0.5514 3.65285   2
   7 -18   0 424.502 26.6201   2
  -7  18   0 469.050 30.6823   1
   7  18   0 423.039 26.7546   2
   8 -18   0 174.521 16.4515   2
  -8  18   0 161.366 19.5667   1
   8  18   0 198.291 17.5845   2
   9 -18   0 178.880 17.5105   2
  -9  18   0 205.521 21.5128   1
   9  18   0 216.633 18.6209   2
  10 -18   0 5.21792 5.54349   2
 -10  18   0 -1.7881 7.10796   1
  10  18   0 5.79765 4.75840   2
  11 -18   0 137.362 17.5707   2
 -11  18   0 130.805 20.6681   1
  11  18   0 108.746 15.8369   2
  12 -18   0 124.529 18.0085   2
 -12  18   0 135.134 20.9819   1
  12  18   0 104.013 16.3433   2
  13 -18   0 3.36662 8.19348   2
 -13  18   0 11.6376 10.9891   1
  13  18   0 3.56711 7.33498   2
  14 -18   0 56.0550 13.3862   2
  14  18   0 110.795 17.9162   2
 -14  18   0 62.3859 16.2352   1
   0 -19   0 0.14498 3.36949   2
   1 -19   0 4.46416 3.26100   2
  -1 -19   0 7.73140 4.14561   2
   1  19   0 0.89102 3.19055   1
   2 -19   0 16.3482 5.51877   2
  -2 -19   0 20.5851 6.75110   2
   2  19   0 17.2229 5.56446   2
   2  19   0 34.4684 6.15519   1
  -2  19   0 17.5385 5.37904   1
   3 -19   0 -0.5170 3.97373   2
   3  19   0 1.28012 3.70069   2
  -3  19   0 5.52949 3.61080   1
   4 -19   0 5.45230 4.75530   2
  -4  19   0 5.57945 4.41827   1
   4  19   0 7.65709 3.71529   1
   4  19   0 1.99228 3.05498   2
   5 -19   0 96.1630 11.6222   2
   5  19   0 99.1600 6.01099   1
   5  19   0 114.224 12.7950   2
   5  19   0 88.1953 6.04838   1
   6 -19   0 43.0954 9.76887   2
   6  19   0 57.0092 9.64622   2
  -6  19   0 67.0137 13.0067   1
   7 -19   0 159.791 15.9780   2
   7  19   0 146.865 14.9190   2
  -7  19   0 157.124 17.6536   1
   8 -19   0 30.4984 8.69308   2
  -8  19   0 34.4625 11.4014   1
   8  19   0 12.7129 6.22591   2
   9 -19   0 -0.7453 4.17370   2
   9  19   0 -0.6107 4.96768   2
  -9  19   0 -1.8894 6.10039   1
  10 -19   0 -0.6535 5.23982   2
 -10  19   0 3.62117 6.93206   1
  10  19   0 1.99899 5.94593   2
  11 -19   0 141.532 17.9822   2
  11  19   0 122.938 16.3985   2
 -11  19   0 145.118 22.5175   1
  12 -19   0 7.68678 8.43990   2
  12  19   0 10.0677 7.24417   2
  13 -19   0 5.08775 7.69270   2
 -13  19   0 -3.7258 8.97708   1
  13  19   0 -3.4968 7.82613   2
  14  19   0 13.1651 8.77229   2
 -14  19   0 8.85940 12.0921   1
   0 -20   0 138.923 14.0396   2
   0  20   0 140.065 13.0353   1
  -1 -20   0 85.7939 11.3333   2
   1 -20   0 86.4749 11.2327   2
   1  20   0 80.6686 9.74281   1
  -2 -20   0 121.646 13.1597   2
   2 -20   0 90.8965 11.9276   2
   2  20   0 123.645 12.4870   2
   2  20   0 88.3737 9.05822   1
  -2  20   0 101.879 12.4592   1
   3  20   0 112.188 15.7657   2
  -3  20   0 120.368 13.4500   1
   4 -20   0 14.0406 5.03084   2
   4  20   0 9.80759 3.36288   1
   4  20   0 8.07247 4.05798   2
  -4  20   0 10.5507 6.23887   1
   5 -20   0 92.4105 12.3099   2
  -5  20   0 132.484 16.4996   1
   5  20   0 115.984 13.2738   2
   5  20   0 116.964 8.26175   1
   6 -20   0 128.663 14.0734   2
   6  20   0 114.275 13.3036   2
  -6  20   0 119.412 15.9352   1
   7 -20   0 16.4363 5.43199   2
   7  20   0 20.5101 6.97553   2
  -7  20   0 22.5890 8.54271   1
   8 -20   0 -2.8516 5.00518   2
  -8  20   0 -2.0680 5.57694   1
   8  20   0 9.33410 6.25260   2
   9 -20   0 15.2696 8.20712   2
   9  20   0 -1.4792 4.78782   2
  -9  20   0 2.87068 7.94361   1
  10 -20   0 42.2428 11.8135   2
 -10  20   0 61.8901 14.4608   1
  10  20   0 50.8266 11.7330   2
  11 -20   0 12.1576 9.35485   2
  11  20   0 22.4761 10.0577   2
 -11  20   0 19.9948 11.2841   1
  12 -20   0 18.2828 9.53048   2
  12  20   0 40.7720 11.4077   2
 -12  20   0 17.3395 10.6438   1
  13 -20   0 38.2316 11.4744   2
  13  20   0 68.3559 14.4917   2
 -13  20   0 57.8774 18.3111   1
 -14  20   0 4.68247 11.8726   1
  14  20   0 25.5623 12.0409   2
   0 -21   0 -2.5318 4.76357   2
   0  21   0 0.18212 3.90066   1
  -1 -21   0 738.562 38.2777   2
   1 -21   0 760.488 38.9962   2
   1  21   0 778.940 35.8062   1
  -1  21   0 792.220 38.3102   1
   2 -21   0 526.074 30.3703   2
  -2  21   0 556.787 31.1578   1
   2  21   0 528.845 26.4024   1
   2  21   0 533.382 30.4954   2
   3 -21   0 29.3323 8.07189   2
   3  21   0 26.2977 7.53812   2
  -3  21   0 33.8872 9.83193   1
   4 -21   0 138.641 14.3554   2
  -4  21   0 109.941 14.3981   1
   4  21   0 127.521 9.32749   1
   4  21   0 120.158 13.0624   2
   5 -21   0 200.844 17.6951   2
  -5  21   0 229.197 21.6227   1
   5  21   0 208.906 18.8109   2
   5  21   0 198.788 10.4837   1
   6 -21   0 18.8351 7.46563   2
   6  21   0 13.9854 6.64733   2
  -6  21   0 13.9004 7.30559   1
   7 -21   0 59.9446 11.4281   2
   7  21   0 28.4179 8.30108   2
  -7  21   0 38.0454 10.1537   1
   8 -21   0 16.7070 6.65062   2
   8  21   0 8.33979 6.50074   2
  -8  21   0 21.0115 9.57540   1
   9 -21   0 139.682 17.3749   2
   9  21   0 97.5578 14.8776   2
  -9  21   0 133.740 19.9231   1
  10 -21   0 12.3088 7.88424   2
 -10  21   0 9.56090 8.05765   1
  10  21   0 16.1526 8.21446   2
  11 -21   0 57.1906 16.2096   2
  11  21   0 59.3299 14.4874   2
 -11  21   0 64.9739 18.7076   1
  12 -21   0 150.588 19.5579   2
 -12  21   0 75.0021 17.7821   1
  12  21   0 96.7501 17.7337   2
  13 -21   0 43.4724 16.1465   2
 -13  21   0 24.7954 14.0409   1
  13  21   0 33.6177 12.5184   2
   0 -22   0 926.111 45.0001   2
   0  22   0 944.814 43.4373   1
   1 -22   0 447.780 28.0656   2
  -1 -22   0 439.982 27.5720   2
   1  22   0 477.300 25.8027   1
  -1  22   0 449.677 27.3718   1
   2 -22   0 759.422 39.2271   2
   2  22   0 750.391 34.0725   1
   2  22   0 690.504 37.8187   2
  -2  22   0 731.219 38.3254   1
   3 -22   0 124.093 14.0795   2
   3  22   0 98.2494 12.8501   2
  -3  22   0 82.1674 15.3281   1
   3  22   0 81.7121 9.36761   1
   4 -22   0 137.199 15.3623   2
   4  22   0 145.656 11.8220   1
  -4  22   0 148.560 16.7581   1
   4  22   0 117.048 14.5690   2
   5 -22   0 414.744 27.9429   2
   5  22   0 502.563 29.5236   2
  -5  22   0 437.516 30.6425   1
   6 -22   0 339.536 24.5889   2
   6  22   0 360.132 25.6204   2
  -6  22   0 329.251 27.0138   1
   7 -22   0 224.518 20.5939   2
  -7  22   0 283.065 24.7901   1
   7  22   0 255.329 21.8726   2
   8 -22   0 120.788 16.0113   2
   8  22   0 162.559 18.0052   2
  -8  22   0 188.236 21.4995   1
   9 -22   0 204.117 20.8850   2
   9  22   0 211.328 20.7138   2
  -9  22   0 187.666 24.6968   1
  10 -22   0 0.88343 7.84663   2
 -10  22   0 4.60186 8.75149   1
  10  22   0 6.94105 7.44517   2
  11 -22   0 104.665 17.3866   2
  11  22   0 148.774 18.8613   2
 -11  22   0 98.4103 22.9416   1
  12 -22   0 16.1229 9.27574   2
  12  22   0 14.6448 8.24671   2
 -12  22   0 34.1200 14.3476   1
  13  22   0 37.8938 13.5522   2
 -13  22   0 3.96425 12.9028   1
   0 -23   0 0.58374 4.45795   2
   0  23   0 7.10681 5.19203   1
   1 -23   0 125.376 14.9576   2
  -1 -23   0 146.014 15.7773   2
   1  23   0 143.562 13.9890   1
  -1  23   0 161.703 15.9790   1
   2 -23   0 103.886 13.1629   2
  -2  23   0 95.1777 15.2091   1
   2  23   0 79.1707 9.76469   1
   2  23   0 86.6489 12.6228   2
   3 -23   0 74.4927 12.7250   2
   3  23   0 58.4624 8.82983   1
   3  23   0 83.1038 12.2257   2
  -3  23   0 85.0761 13.5109   1
   4 -23   0 116.862 14.7185   2
   4  23   0 107.186 13.4928   2
  -4  23   0 116.789 16.1155   1
   5 -23   0 156.969 16.1182   2
  -5  23   0 168.040 18.4852   1
   5  23   0 110.571 14.9392   2
   5  23   0 112.172 8.27807   1
   6 -23   0 90.8423 14.0496   2
   6  23   0 83.1850 13.0118   2
  -6  23   0 89.6715 15.7759   1
   7 -23   0 219.115 20.2207   2
  -7  23   0 249.097 24.2084   1
   7  23   0 246.160 21.4530   2
   8 -23   0 11.1196 8.35488   2
   8  23   0 29.0684 11.0158   2
  -8  23   0 35.2484 11.6676   1
   9 -23   0 -5.3079 6.77898   2
  -9  23   0 -7.2129 7.57975   1
   9  23   0 3.13681 5.63417   2
  10 -23   0 -10.255 7.00995   2
  10  23   0 -0.0984 7.15005   2
 -10  23   0 7.43669 10.9070   1
  11 -23   0 39.4422 12.3247   2
  11  23   0 25.2895 10.2527   2
 -11  23   0 36.8529 14.9425   1
  12 -23   0 4.07988 10.4228   2
 -12  23   0 14.3726 11.9436   1
  12  23   0 16.3419 10.1839   2
   0 -24   0 89.9858 13.4076   2
   0  24   0 87.1910 12.4975   1
  -1 -24   0 2.65221 4.69498   2
   1 -24   0 -3.4776 4.33837   2
   1  24   0 6.72897 5.14587   1
  -1  24   0 0.54768 4.92604   1
   2 -24   0 49.5219 11.4195   2
   2  24   0 45.1772 9.38317   1
   2  24   0 26.4168 8.16294   2
  -2  24   0 24.7410 9.00613   1
   3 -24   0 -0.2639 5.15288   2
   3  24   0 6.73230 4.84992   2
  -3  24   0 -1.0895 5.44534   1
   3  24   0 -3.6953 4.36153   1
   4 -24   0 73.8416 13.1541   2
   4  24   0 77.6487 12.9477   2
  -4  24   0 94.2360 15.3070   1
   5 -24   0 770.293 42.9277   2
  -5  24   0 819.750 46.1506   1
   5  24   0 813.341 43.4463   2
   6 -24   0 51.3169 11.9584   2
   6  24   0 37.4130 10.0717   2
  -6  24   0 42.1948 11.7501   1
   7 -24   0 35.3813 11.6394   2
  -7  24   0 38.6596 13.5870   1
   7  24   0 32.1075 9.69496   2
   8 -24   0 79.9102 15.1984   2
  -8  24   0 76.4612 17.1467   1
   8  24   0 76.7709 14.1333   2
   9  24   0 -5.3856 8.14019   2
  10 -24   0 105.603 17.8313   2
  10  24   0 86.3849 16.9934   2
 -10  24   0 109.413 22.3405   1
  11 -24   0 3.07360 8.52139   2
  11  24   0 6.87592 8.37174   2
 -11  24   0 5.84163 10.7801   1
 -12  24   0 1.51355 11.8249   1
  12  24   0 11.3614 8.70250   2
   0 -25   0 5.02606 5.72811   2
   0  25   0 -3.1375 5.32930   1
  -1 -25   0 7.26786 5.24273   2
   1 -25   0 9.73918 7.09694   2
   1  25   0 1.35047 5.99273   1
  -1  25   0 2.07848 6.38387   1
   2 -25   0 15.8777 7.75062   2
  -2  25   0 16.0156 8.67798   1
   2  25   0 7.57296 5.52447   1
   2  25   0 13.3697 6.61269   2
   3 -25   0 -0.0186 5.56664   2
   3  25   0 7.04796 5.80263   2
   4 -25   0 134.200 16.9733   2
   4  25   0 139.665 16.7518   2
  -4  25   0 158.479 19.0791   1
   5 -25   0 67.0484 12.3361   2
  -5  25   0 59.0436 12.3254   1
   5  25   0 67.6633 12.5018   2
   6 -25   0 38.6526 12.6301   2
  -6  25   0 21.1471 9.27156   1
   7 -25   0 135.982 17.3214   2
   7  25   0 127.530 17.0516   2
  -7  25   0 167.325 22.8081   1
   8 -25   0 0.87744 10.2867   2
   8  25   0 3.07527 9.40214   2
  -8  25   0 2.61929 9.72676   1
   9 -25   0 4.24736 7.89365   2
   9  25   0 -5.7119 7.28744   2
  -9  25   0 -4.3991 8.22157   1
  10 -25   0 12.7062 10.1954   2
  10  25   0 11.4444 9.00470   2
 -10  25   0 5.40130 11.2448   1
 -11  25   0 14.3706 14.0217   1
  11  25   0 -1.7410 9.19117   2
   0 -26   0 554.268 35.5329   2
   0  26   0 712.012 50.0732   1
  -1 -26   0 72.6082 13.8501   2
   1 -26   0 32.5243 9.23552   2
  -1  26   0 53.8499 12.0923   1
   1  26   0 60.2700 11.7539   1
   1  26   0 32.0130 8.28956   2
   2 -26   0 68.0282 13.3181   2
   2  26   0 89.4873 13.7153   2
   2  26   0 80.1075 12.5207   1
  -2  26   0 67.1760 14.6786   1
   3 -26   0 6.58950 6.44828   2
   3  26   0 1.78267 5.90509   1
  -3  26   0 4.30773 7.51925   1
   3  26   0 9.35363 5.49331   2
   4 -26   0 37.2570 9.79166   2
   4  26   0 21.7401 7.35596   2
  -4  26   0 35.2120 11.8066   1
   5 -26   0 32.5599 11.1151   2
   5  26   0 14.0941 8.26733   2
  -5  26   0 34.1703 11.8132   1
   6 -26   0 49.3135 10.8403   2
   6  26   0 73.1725 13.7061   2
  -6  26   0 96.5625 19.6187   1
   7 -26   0 26.0077 11.0437   2
  -7  26   0 42.8768 12.7409   1
   7  26   0 52.3193 16.6983   2
   8 -26   0 4.15859 7.25505   2
  -8  26   0 10.6860 11.7005   1
   8  26   0 2.84796 5.98137   2
   9 -26   0 39.0363 12.9653   2
  -9  26   0 18.0580 12.9118   1
   9  26   0 38.5278 11.9537   2
  10 -26   0 98.1062 18.5184   2
 -10  26   0 118.982 25.7090   1
  10  26   0 107.705 19.2076   2
   0 -27   0 -0.7110 4.92776   2
   0  27   0 2.85674 6.91061   1
   1 -27   0 73.1232 14.4797   2
   1  27   0 92.3904 13.9884   2
  -1  27   0 71.1629 14.1841   1
   1  27   0 87.5220 14.2455   1
   2 -27   0 11.8817 8.44792   2
   2  27   0 14.2473 6.86471   1
  -2  27   0 2.92209 8.36219   1
   2  27   0 18.1701 6.41971   2
   3 -27   0 74.2598 14.4871   2
   3  27   0 81.8395 12.1461   1
  -3  27   0 94.5797 17.5540   1
   3  27   0 86.1036 13.9701   2
   4 -27   0 2.88896 6.45405   2
  -4  27   0 -2.6166 6.87134   1
   4  27   0 6.42383 6.13633   2
   5 -27   0 8.74594 7.66454   2
   5  27   0 2.20972 5.46455   2
  -5  27   0 -4.6131 9.30487   1
   6 -27   0 -0.2414 8.16588   2
  -6  27   0 7.78669 9.50618   1
   7 -27   0 11.0942 8.82496   2
  -7  27   0 -3.9188 9.71423   1
   7  27   0 -8.7698 5.53450   2
   8 -27   0 44.8142 12.9504   2
  -8  27   0 26.0512 13.5857   1
   8  27   0 40.0032 10.8443   2
   9 -27   0 51.5614 12.8901   2
   9  27   0 60.9123 13.5881   2
  -9  27   0 42.3352 15.2564   1
  10  27   0 5.88784 9.43105   2
   0 -28   0 128.697 17.8226   2
   0  28   0 131.565 17.4757   1
   1 -28   0 -1.2613 6.61008   2
   1  28   0 9.46138 7.79053   2
   1  28   0 8.47109 7.22687   1
  -1  28   0 16.2952 8.75950   1
   2 -28   0 120.713 16.9812   2
   2  28   0 101.544 15.8395   2
  -2  28   0 95.6278 17.7530   1
   3 -28   0 190.642 20.6082   2
   3  28   0 164.205 15.2092   1
  -3  28   0 125.499 19.7118   1
   3  28   0 154.191 18.3284   2
   4 -28   0 70.0267 15.5645   2
   4  28   0 66.3865 14.3158   2
  -4  28   0 40.7638 12.6495   1
   5 -28   0 -4.2539 7.79206   2
  -5  28   0 7.44128 9.95284   1
   5  28   0 -2.8821 5.48870   2
   6 -28   0 8.94124 8.22929   2
   6  28   0 24.9142 9.36003   2
   7 -28   0 62.3436 14.4844   2
  -7  28   0 80.8136 19.7312   1
   7  28   0 55.3046 13.3114   2
   8 -28   0 -0.2312 7.87737   2
   8  28   0 -8.7991 6.86654   2
  -8  28   0 -2.4788 10.4907   1
  -9  28   0 -7.1113 10.4028   1
   9  28   0 22.8486 8.16993   2
   0 -29   0 -0.9664 6.58772   2
   0  29   0 -0.7429 7.38585   1
   1 -29   0 5.57602 6.37237   2
  -1  29   0 22.1620 10.0722   1
   1  29   0 7.70998 7.88406   1
   1  29   0 16.4728 10.6383   2
   2 -29   0 659.812 50.7794   2
  -2  29   0 597.760 38.2157   1
   2  29   0 620.454 48.5170   2
   3 -29   0 13.7094 9.51790   2
   3  29   0 4.45933 7.44046   1
   3  29   0 33.8428 10.8287   2
  -3  29   0 -2.2584 9.14260   1
   4 -29   0 104.580 16.9339   2
  -4  29   0 108.468 20.1518   1
   4  29   0 114.409 17.5406   2
   5 -29   0 -5.4128 6.12245   2
   5  29   0 2.85102 7.17270   2
  -5  29   0 -6.5370 11.0909   1
   6 -29   0 17.9532 9.98305   2
   6  29   0 7.85871 7.95528   2
  -6  29   0 0.09646 11.1337   1
   7 -29   0 35.1925 12.4640   2
  -7  29   0 35.0753 15.3669   1
   7  29   0 35.2220 11.2582   2
   8  29   0 0.50053 7.41099   2
  -8  29   0 -4.4418 11.9502   1
   0 -30   0 64.5071 13.8521   2
   0  30   0 75.0244 14.2337   2
   0  30   0 87.5463 17.1724   1
   1 -30   0 26.6801 9.47106   2
   1  30   0 13.6607 9.09519   2
  -1  30   0 25.5451 11.4017   1
   2 -30   0 129.641 19.8632   2
   2  30   0 105.219 15.9678   1
  -2  30   0 110.826 19.6499   1
   2  30   0 145.181 19.7209   2
   3 -30   0 263.986 25.2601   2
  -3  30   0 287.703 27.6988   1
   3  30   0 267.740 25.9697   2
   4 -30   0 37.8322 13.3099   2
   4  30   0 28.9961 10.9315   2
  -4  30   0 33.6616 12.5544   1
   5 -30   0 -0.2316 7.41712   2
   5  30   0 5.77410 7.15077   2
  -5  30   0 9.43602 10.7001   1
   6 -30   0 10.4258 11.3997   2
  -6  30   0 17.5301 11.7175   1
   6  30   0 19.1808 11.1132   2
   7  30   0 5.91377 9.30287   2
  -7  30   0 12.6975 13.6388   1
   0  31   0 -1.8520 7.86656   2
   0  31   0 12.4099 9.58166   1
   1 -31   0 122.558 19.4812   2
   1  31   0 93.8333 18.8409   1
   1  31   0 114.758 18.7132   2
  -1  31   0 85.2121 16.3009   1
   2 -31   0 33.6675 12.7574   2
   2  31   0 21.4545 9.33248   1
   2  31   0 21.4629 9.78162   2
  -2  31   0 22.1654 11.2940   1
   3 -31   0 -1.1076 8.44296   2
  -3  31   0 16.4521 12.3859   1
   3  31   0 7.94115 7.35070   2
   4 -31   0 4.60201 7.92800   2
   4  31   0 3.50254 7.96301   2
  -4  31   0 -15.200 9.11733   1
  -5  31   0 22.4675 11.8961   1
   5  31   0 53.5056 13.8377   2
   6  31   0 15.1904 10.4422   2
  -6  31   0 1.76324 11.2446   1
   0  32   0 1.21312 8.81291   2
   1 -32   0 190.216 22.7574   2
   1  32   0 216.280 25.9068   1
  -1  32   0 234.166 26.5145   1
   1  32   0 242.797 25.7627   2
   2 -32   0 70.6312 17.4857   2
   2  32   0 55.9951 14.1544   2
  -2  32   0 66.9244 16.6421   1
   2  32   0 106.352 19.5538   1
   3  32   0 0.18092 8.86702   2
  -3  32   0 8.38511 11.5591   1
  -4  32   0 132.080 23.7242   1
   4  32   0 79.8137 17.1138   2
   0  33   0 6.78257 8.53562   2
   1  33   0 4.29420 11.2067   1
  -1  33   0 7.15105 7.91145   2
   1  33   0 18.4362 9.64454   2
 -17   0   1 4.94476 12.2081   1
  17   0  -1 24.6381 9.86321   2
  16   0  -1 -1.1338 5.75763   2
  15   0  -1 74.5125 14.7847   2
 -15   0   1 71.1863 14.6058   1
  14   0  -1 4.85996 6.28113   2
 -14   0   1 -0.6684 6.56517   1
  13   0  -1 84.9256 12.2090   2
 -12   0   1 10.2240 5.76530   1
  12   0  -1 -2.3411 3.69041   2
  11   0  -1 97.4561 11.5908   2
 -11   0   1 130.798 11.8940   1
  10   0  -1 5.90883 3.11106   2
 -10   0   1 3.00972 3.95605   1
   9   0  -1 425.980 23.2018   2
  -9   0   1 440.741 21.9691   1
   8   0  -1 -1.6213 1.49060   2
  -8   0   1 -0.0371 2.25335   1
  -7   0   1 -0.4480 1.54772   1
   7   0  -1 1.16769 1.83493   2
   7   0  -1 3.39951 4.15538   1
   6   0  -1 -0.9669 1.18611   2
  -6   0   1 -3.9061 1.44404   1
   6   0  -1 -3.1458 1.78999   1
   5   0  -1 835.213 31.8924   1
  -5   0   1 816.034 31.6727   1
   5   0  -1 842.739 32.3776   2
  -4   0   1 0.04690 1.05689   2
   4   0  -1 -0.6878 1.07367   2
  -4   0   1 0.05166 1.09866   1
   4   0  -1 0.82106 1.19447   1
  -3   0   1 920.437 32.5759   1
  -3   0   1 915.481 32.7968   2
   3   0  -1 899.553 32.4729   1
   3   0  -1 934.161 32.9360   2
   2   0  -1 1.44203 0.79189   1
   2   0  -1 -0.5104 0.63722   2
  -2   0   1 -0.0321 0.53083   2
  -2   0   1 -0.6748 0.65997   1
  -1   0  -1 399.659 13.8321   1
   1   0   1 381.218 13.7912   2
  -1   0  -1 380.781 14.3643   2
  -2   0  -1 2.32459 0.95542   1
  -2   0  -1 0.38083 0.85690   2
   2   0   1 -0.2934 0.56721   2
  -2   0  -1 2.19308 1.12910   1
  -3   0  -1 762.964 28.0399   1
  -3   0  -1 777.710 27.7283   1
  -3   0  -1 756.547 28.1920   2
   3   0   1 757.797 28.2011   2
  -4   0  -1 2.00439 1.35866   2
  -4   0  -1 0.51766 1.31019   1
   4   0   1 0.95924 0.94149   2
  -4   0  -1 5.37192 1.95697   1
  -5   0  -1 48.1470 4.78059   1
   5   0   1 52.0349 5.31390   2
  -5   0  -1 43.8002 4.72591   1
   6   0   1 1.86610 2.24460   2
  -6   0  -1 -0.9774 1.85425   1
  -6   0  -1 0.08935 1.51845   1
   7   0   1 6.80925 2.76473   2
  -7   0  -1 3.11818 2.11642   1
  -8   0  -1 -1.2976 2.57754   1
   8   0   1 -1.3835 1.98612   2
   9   0   1 352.342 20.3651   2
  -9   0  -1 342.093 19.2395   1
  10   0   1 -1.3806 2.45889   2
 -10   0  -1 -0.8932 3.08410   1
 -11   0  -1 8.07230 5.15509   1
  11   0   1 1.41954 5.14981   2
  12   0   1 -1.8860 4.19191   2
 -12   0  -1 3.76270 4.35018   1
  13   0   1 283.195 21.8689   2
 -14   0  -1 -2.5232 6.21717   1
  14   0   1 -6.2063 5.27868   2
 -15   0  -1 25.8088 9.35235   1
  15   0   1 2.42048 6.31361   2
  16   0   1 0.38308 7.61161   2
 -16   0  -1 -8.0626 9.13467   1
  17   0   1 62.4727 15.1160   2
 -17   0  -1 78.5845 16.3608   1
  17  -1  -1 19.4457 9.71892   2
  17   1  -1 10.9440 8.40834   2
  16  -1  -1 13.2865 7.69783   2
 -16  -1   1 6.36606 9.07076   1
  16   1  -1 10.6837 7.34248   2
 -16   1   1 -2.4249 8.46096   1
  15  -1  -1 38.0394 11.7005   2
 -15  -1   1 69.6445 14.1442   1
  15   1  -1 46.3318 12.5103   2
 -15   1   1 66.1871 11.4618   1
  14  -1  -1 10.7627 6.19587   2
 -14  -1   1 8.15314 6.91260   1
 -14   1   1 11.7012 6.54643   1
  14   1  -1 2.92901 5.49439   2
  13  -1  -1 504.422 30.6129   2
 -13   1   1 563.312 34.3290   1
  13   1  -1 502.104 30.5715   2
 -12  -1   1 27.8891 7.10378   1
  12  -1  -1 18.4384 5.74080   2
  12   1  -1 17.7659 7.52599   2
 -12   1   1 24.9308 6.86120   1
  11  -1  -1 226.937 17.2790   2
 -11  -1   1 222.544 15.4104   1
 -11   1   1 229.944 16.4606   1
  11   1  -1 243.667 17.7832   2
 -10  -1   1 439.846 21.9792   1
  10  -1  -1 380.068 23.2261   2
 -10   1   1 418.343 22.5390   1
  10   1  -1 416.193 23.4144   2
  -9  -1   1 429.742 24.6334   1
   9  -1  -1 424.668 23.5513   2
  -9   1   1 471.670 23.2532   1
   9   1  -1 450.329 23.8007   2
   8  -1  -1 17.5718 4.50094   2
  -8  -1   1 16.5219 3.81729   1
  -8   1   1 10.0365 3.42572   1
   8   1  -1 8.37714 3.11395   2
   7  -1  -1 118.414 9.32327   2
  -7  -1   1 114.745 8.56902   1
   7   1  -1 116.066 9.35522   2
  -7   1   1 128.067 9.53757   1
   7   1  -1 123.967 8.92210   1
  -6  -1   1 612.783 25.3193   1
   6  -1  -1 632.819 26.8358   2
   6  -1  -1 593.798 26.2906   1
   6   1  -1 700.046 27.5451   2
   6   1  -1 633.285 25.7320   1
  -6   1   1 622.257 26.5889   1
   5  -1  -1 26.1459 4.01090   1
   5  -1  -1 24.4275 3.79185   2
  -5  -1   1 23.3616 3.47820   1
   5   1  -1 27.5919 3.84767   2
   5   1  -1 25.9313 3.74183   1
  -5   1   1 24.3229 3.90568   1
   4  -1  -1 3.15162 1.84309   2
  -4  -1   1 0.47643 1.07067   2
  -4  -1   1 2.98708 1.49729   1
   4  -1  -1 5.03421 2.07427   1
  -4   1   1 -0.6226 0.81839   1
  -4   1   1 2.33261 1.42255   2
   4   1  -1 3.35692 1.81240   2
   3  -1  -1 214.209 10.1625   1
  -3  -1   1 212.982 9.20257   1
  -3  -1   1 209.534 9.92842   2
   3  -1  -1 208.246 9.90636   2
  -3   1   1 217.767 9.95771   2
   3   1  -1 223.920 9.33480   1
   3   1  -1 222.320 10.1208   2
  -3   1   1 235.547 10.5104   1
  -2  -1   1 24.4822 1.86156   1
   2  -1  -1 22.5012 2.17227   2
   2  -1  -1 22.4208 2.44209   1
  -2  -1   1 21.7528 2.14119   2
   2   1  -1 19.0715 1.74648   1
  -2   1   1 23.8994 2.41774   1
   2   1  -1 22.1671 2.18218   2
   1  -1  -1 9346.79 314.009   3
  -1  -1  -1 868.444 27.5696   1
  -1  -1  -1 819.605 28.1015   2
   1  -1   1 783.730 28.0417   2
   1   1   1 833.440 28.1268   2
   2  -1   1 83.9085 4.82840   2
  -2  -1  -1 85.1869 4.84638   2
  -2  -1  -1 91.5373 4.33282   1
   2  -1   1 90.5342 5.35578   1
   2   1   1 80.9719 4.76854   2
  -2   1  -1 84.1702 5.04412   1
  -2   1  -1 90.3447 5.33975   1
   2   1   1 89.9352 4.40265   1
  -2   1  -1 81.6210 4.77763   2
  -3  -1  -1 4188.81 136.811   1
  -3  -1  -1 4249.63 136.518   1
   3  -1   1 4324.76 138.332   1
  -3  -1  -1 4094.76 137.646   2
   3  -1   1 4233.08 137.793   2
  -3   1  -1 4112.97 138.014   1
  -3   1  -1 3986.43 137.475   2
   3   1   1 4076.38 137.639   2
   4  -1   1 107.586 7.02801   2
  -4  -1  -1 101.285 6.17317   1
  -4  -1  -1 103.614 6.94486   2
   4  -1   1 98.7185 7.18135   1
  -4  -1  -1 108.654 6.53873   1
  -4   1  -1 97.9624 6.66291   1
  -4   1  -1 118.740 7.55728   1
  -4   1  -1 98.1707 6.70284   2
   4   1   1 120.366 7.33240   2
  -5  -1  -1 1237.19 44.4920   1
   5  -1   1 1262.67 45.9002   2
  -5  -1  -1 1213.78 43.9363   1
  -5   1  -1 1231.37 45.7598   1
   5   1   1 1248.35 45.8693   2
  -5   1  -1 1202.88 44.9230   1
   6  -1   1 248.352 13.8436   2
  -6  -1  -1 227.503 11.9202   1
  -6  -1  -1 228.860 12.4074   1
   6   1   1 244.812 13.7146   2
  -6   1  -1 255.559 13.8034   1
  -6   1  -1 226.592 12.6871   1
  -7  -1  -1 130.484 9.41094   1
  -7  -1  -1 128.916 8.89091   1
   7  -1   1 143.982 10.4797   2
  -7   1  -1 118.081 9.89776   1
   7   1   1 139.141 10.3360   2
   8  -1   1 183.937 13.2420   2
  -8  -1  -1 195.595 12.3773   1
  -8   1  -1 199.298 13.4488   1
   8   1   1 194.618 13.6361   2
  -9  -1  -1 26.9111 5.37755   1
   9  -1   1 16.8102 5.05847   2
  -9   1  -1 27.1353 5.58339   1
   9   1   1 17.2319 5.08189   2
 -10  -1  -1 81.6300 9.17961   1
  10  -1   1 84.8716 9.98559   2
 -10   1  -1 83.6622 9.70239   1
  10   1   1 88.3697 10.3247   2
 -11  -1  -1 -1.4289 3.86439   1
  11  -1   1 4.79148 4.28427   2
 -11   1  -1 3.26033 4.49052   1
  11   1   1 -2.8780 2.74213   2
 -12  -1  -1 61.9323 15.3518   1
  12  -1   1 40.2044 10.0772   2
 -12   1  -1 70.0373 11.3665   1
  12   1   1 38.9072 9.25873   2
  13  -1   1 99.9799 13.6575   2
  13   1   1 115.722 13.8631   2
  14  -1   1 27.0475 9.47612   2
 -14  -1  -1 44.9085 9.82284   1
  14   1   1 67.1572 14.3079   2
 -14   1  -1 44.5539 11.2737   1
  15  -1   1 22.3573 8.97502   2
 -15  -1  -1 27.3364 10.5255   1
  15   1   1 17.6433 9.25158   2
  16  -1   1 55.3490 13.3327   2
 -16  -1  -1 43.5985 10.5666   1
  16   1   1 42.5523 12.0138   2
 -16   1  -1 48.1132 12.7860   1
  17  -1   1 90.4525 18.6347   2
 -17   1  -1 94.4125 26.5808   1
  17   1   1 65.9469 16.1220   2
  17  -2  -1 58.8008 13.3955   2
  17   2  -1 44.7256 13.3625   2
 -17   2   1 69.3328 16.3328   1
 -16  -2   1 26.5017 10.9066   1
  16  -2  -1 40.6920 10.7823   2
  16   2  -1 34.4647 9.49055   2
 -16   2   1 42.5781 11.9520   1
 -15  -2   1 45.9174 9.64541   1
  15  -2  -1 41.7241 10.8793   2
 -15   2   1 40.6451 12.1869   1
  15   2  -1 42.3825 12.2778   2
 -14  -2   1 12.5391 6.87835   1
  14  -2  -1 17.1744 8.55901   2
 -14   2   1 14.8600 6.93828   1
  14   2  -1 -1.1731 4.90376   2
 -13  -2   1 100.303 13.3793   1
  13  -2  -1 84.9830 12.5329   2
 -13   2   1 91.1557 12.4040   1
  13   2  -1 97.3331 13.2682   2
  12  -2  -1 585.465 32.3075   2
  12   2  -1 624.927 33.2463   2
 -12   2   1 592.822 31.4902   1
  11  -2  -1 9.46148 5.18907   2
 -11  -2   1 8.20394 3.78438   1
  11   2  -1 11.0446 5.11210   2
 -11   2   1 15.0080 5.53767   1
  10  -2  -1 1705.58 68.6885   2
 -10  -2   1 1797.44 67.2457   1
  10   2  -1 1747.59 68.8666   2
 -10   2   1 1761.25 68.1716   1
   9  -2  -1 457.027 24.1385   2
  -9  -2   1 454.227 21.3755   1
  -9   2   1 430.084 23.2492   1
   9   2  -1 440.877 23.5685   2
  -8  -2   1 21.9558 4.48102   1
  -8  -2   1 25.0827 4.70280   1
   8  -2  -1 17.3839 4.51631   2
   8   2  -1 18.7632 4.92240   2
  -8   2   1 18.7723 4.95899   1
   7  -2  -1 42.2005 5.36922   2
  -7  -2   1 37.1167 4.66556   1
   7   2  -1 36.6891 5.50206   2
  -7   2   1 36.9935 5.64376   1
   7   2  -1 46.6989 5.10172   1
   6  -2  -1 4.71121 2.16440   2
  -6  -2   1 1.31017 1.37863   1
   6   2  -1 5.83586 2.77771   2
   6   2  -1 2.96668 1.92378   1
  -6   2   1 0.27191 1.82410   1
   5  -2  -1 345.003 16.5808   1
  -5  -2   1 318.456 14.3457   1
   5  -2  -1 350.212 16.3379   2
  -5   2   1 349.623 16.7402   1
   5   2  -1 346.353 16.2933   2
   5   2  -1 366.555 14.8229   1
  -4  -2   1 95.1919 6.60672   2
  -4  -2   1 94.8389 5.47593   1
   4   2  -1 101.004 6.76679   2
   4   2  -1 99.7749 5.61599   1
  -4   2   1 102.367 7.11580   1
  -4   2   1 108.354 6.72885   2
   3  -2  -1 4571.32 145.652   2
   3  -2  -1 4211.68 146.009   1
  -3  -2   1 4323.24 143.597   1
  -3  -2   1 4425.27 145.655   2
   3   2  -1 4353.41 143.668   1
  -3   2   1 4431.42 146.352   1
  -3   2   1 4543.52 145.483   2
  -2  -2   1 1610.32 55.4316   2
  -2  -2   1 1579.46 53.7048   1
   2  -2  -1 1698.07 55.4254   2
   2  -2  -1 1662.85 56.1650   1
   2   2  -1 1583.27 53.7135   1
   2   2  -1 1695.92 55.5755   2
  -2   2   1 1655.46 56.1679   1
  -2   2   1 1657.04 55.3085   2
   1  -2  -1 2.73745 0.75104   2
  -1  -2   1 2.79282 0.74466   2
   1  -2  -1 2.44785 0.87812   1
   1   2  -1 3.51785 0.74656   1
  -1   2   1 4.53688 0.96387   2
   1   2  -1 1.45837 0.55379   2
  -1   2   1 3.07291 1.01936   1
  -1  -2  -1 50.7019 2.31588   1
   1  -2   1 53.5199 3.65373   1
  -1  -2  -1 48.5418 3.01361   2
   1  -2   1 45.6132 2.99184   2
   1   2   1 45.1279 2.92152   2
   1   2   1 50.7613 2.51477   1
  -1   2  -1 48.6415 3.41160   1
  -1   2  -1 48.6505 3.02622   2
   2  -2   1 2432.08 82.3092   2
   2  -2   1 2368.13 83.0894   1
  -2  -2  -1 2595.23 82.5196   2
  -2  -2  -1 2554.18 80.6967   1
  -2   2  -1 2338.02 82.1261   2
  -2   2  -1 2438.90 83.2380   1
   2   2   1 2544.30 80.7351   1
  -3  -2  -1 515.760 17.9688   1
   3  -2   1 494.107 19.6611   2
  -3  -2  -1 515.286 21.2625   2
   3  -2   1 459.154 20.1254   1
  -3  -2  -1 496.892 18.1782   1
  -3   2  -1 485.387 20.3346   1
  -4  -2  -1 305.694 12.8342   1
   4  -2   1 311.834 14.4664   2
  -4  -2  -1 312.523 12.6932   1
   4  -2   1 306.499 14.8968   1
  -4   2  -1 305.306 14.1811   2
   4   2   1 315.421 14.4377   2
  -4   2  -1 299.503 14.8483   1
   5  -2   1 29.6831 4.66033   1
  -5  -2  -1 40.8307 3.71453   1
   5  -2   1 37.6993 4.64021   2
  -5  -2  -1 36.0218 3.75609   1
   5   2   1 48.4019 4.84306   2
  -5   2  -1 34.8592 4.88245   1
   6  -2   1 686.760 29.6319   2
  -6  -2  -1 712.371 27.7485   1
  -6   2  -1 711.401 30.1346   1
   6   2   1 714.033 29.9251   2
  -7  -2  -1 189.505 10.8502   1
   7  -2   1 161.077 11.6759   2
  -7  -2  -1 175.903 10.3592   1
   7   2   1 181.349 12.2902   2
  -8  -2  -1 1313.88 48.4530   1
   8  -2   1 1251.56 51.0419   2
  -8   2  -1 1213.97 50.5845   1
   8   2   1 1345.23 51.5598   2
   9  -2   1 110.540 10.9165   2
  -9  -2  -1 119.850 9.48027   1
   9   2   1 112.891 10.5831   2
  -9   2  -1 113.633 10.9189   1
 -10  -2  -1 82.5974 8.73784   1
 -10   2  -1 72.5774 9.79423   1
  10   2   1 58.1565 8.90996   2
 -11  -2  -1 22.9732 6.04631   1
  11  -2   1 24.2535 7.38019   2
  11   2   1 24.7311 7.30541   2
 -11   2  -1 16.7884 6.40152   1
  12  -2   1 74.3908 14.0576   2
 -12   2  -1 73.0625 11.5380   1
  12   2   1 71.2952 11.6198   2
 -13  -2  -1 13.3296 5.78826   1
  13  -2   1 16.8292 8.05099   2
  13   2   1 3.05128 4.97160   2
 -13   2  -1 7.34699 6.79872   1
 -14  -2  -1 8.05299 6.40066   1
  14  -2   1 10.3719 7.12209   2
 -14   2  -1 0.68495 6.94970   1
  14   2   1 -2.1626 5.01250   2
  15  -2   1 23.9488 8.42325   2
 -15  -2  -1 52.2890 11.2152   1
 -15   2  -1 53.1204 11.8203   1
  15   2   1 43.4803 10.7577   2
 -16  -2  -1 -6.9966 9.61836   1
  16  -2   1 12.8195 9.06167   2
  16   2   1 1.49271 6.69261   2
 -16   2  -1 8.07903 9.72489   1
  17  -2   1 63.1303 14.5990   2
 -17   2  -1 108.895 22.5912   1
  17   2   1 25.7504 10.7066   2
  17  -3  -1 3.11301 8.25321   2
  17   3  -1 3.95827 8.80854   2
 -17   3   1 1.70289 9.99716   1
  16  -3  -1 91.2108 16.0003   2
 -16  -3   1 73.7427 13.2618   1
  16   3  -1 67.0126 14.2936   2
 -16   3   1 67.7282 15.8618   1
  15  -3  -1 210.807 20.9665   2
 -15  -3   1 202.581 16.9234   1
 -15   3   1 230.189 21.4943   1
  15   3  -1 220.180 21.4653   2
 -14  -3   1 17.4813 6.74294   1
  14  -3  -1 28.9492 9.20146   2
  14   3  -1 18.9209 8.06019   2
 -14   3   1 14.9149 9.89468   1
  13  -3  -1 347.669 24.7779   2
 -13  -3   1 336.241 20.3400   1
  13   3  -1 389.521 25.3756   2
 -13   3   1 355.452 24.3263   1
 -12  -3   1 5.48270 4.89470   1
  12  -3  -1 6.17746 3.66450   2
  12   3  -1 0.16466 4.17783   2
 -12   3   1 6.60385 5.75997   1
 -11  -3   1 2.96614 3.36182   1
  11  -3  -1 3.38776 3.79329   2
  11   3  -1 -2.4330 3.32110   2
 -11   3   1 -0.2332 3.70533   1
  10  -3  -1 300.814 19.9580   2
 -10  -3   1 316.487 17.0260   1
 -10   3   1 347.952 20.6169   1
  10   3  -1 342.599 20.5527   2
  -9  -3   1 76.8386 7.37777   1
   9  -3  -1 90.5205 9.93591   2
  -9   3   1 78.3950 9.11090   1
   9   3  -1 72.7529 8.74817   2
  -8  -3   1 105.043 8.02280   1
   8  -3  -1 113.810 9.63387   2
  -8  -3   1 99.9708 7.54759   1
   8   3  -1 109.771 9.78977   2
  -8   3   1 111.806 10.4102   1
   7  -3  -1 26.6603 4.37582   2
  -7  -3   1 22.8340 4.46230   1
  -7  -3   1 20.2642 3.81911   1
   7   3  -1 17.5594 4.18880   2
  -7   3   1 24.6512 5.36750   1
  -6  -3   1 410.222 16.8232   1
   6  -3  -1 417.076 19.6310   2
  -6   3   1 412.117 20.2430   1
   6   3  -1 395.338 16.9844   1
   6   3  -1 388.953 19.3366   2
  -5  -3   1 913.568 32.9740   1
   5  -3  -1 897.494 36.4190   1
   5  -3  -1 932.330 35.9267   2
   5   3  -1 951.873 33.3408   1
   5   3  -1 960.846 36.1633   2
  -5   3   1 942.627 36.9392   1
   4  -3  -1 476.353 20.3465   1
  -4  -3   1 465.417 16.9009   1
   4   3  -1 463.164 19.4992   2
  -4   3   1 447.674 20.2349   1
   4   3  -1 460.532 17.0081   1
  -3  -3   1 2688.41 90.9648   1
  -3  -3   1 2826.36 94.5258   2
   3  -3  -1 2863.41 93.8507   2
   3  -3  -1 2754.29 94.7821   1
   3   3  -1 2701.21 91.0414   1
  -3   3   1 2829.88 93.7758   2
   3   3  -1 2896.56 94.1136   2
  -3   3   1 2799.96 95.0054   1
   2  -3  -1 -0.1640 1.00355   1
  -2  -3   1 2.30284 1.10767   2
  -2  -3   1 2.23575 0.45134   1
   2  -3  -1 0.87205 0.93097   2
   2   3  -1 2.77100 1.28018   2
  -2   3   1 1.58572 1.09511   1
  -2   3   1 2.75821 1.13519   2
   2   3  -1 1.19466 0.40205   1
   1  -3  -1 6.88926 1.71634   1
   1  -3  -1 5.30504 1.23809   2
  -1  -3   1 3.63318 0.97729   2
   1   3  -1 6.46972 0.95706   1
   1   3  -1 6.80965 1.45579   2
  -1   3   1 5.47157 1.35370   2
   1   3  -1 4.40804 1.26578   2
  -1   3   1 6.66146 1.66776   1
   0  -3   1 82.1260 4.39877   2
   0  -3  -1 82.3641 4.34225   2
   0  -3  -1 80.9654 4.25311   1
   0   3  -1 84.7317 4.41229   1
   0   3   1 89.0239 4.33954   1
   0   3   1 82.6846 4.29259   2
   0   3  -1 74.1724 4.23634   2
   0   3  -1 81.8754 4.51978   1
  -1  -3  -1 1276.16 44.4415   2
   1  -3   1 1292.04 44.5137   2
  -1  -3  -1 1341.28 43.2249   1
   1  -3   1 1245.63 45.2202   1
   1   3   1 1327.11 44.5389   2
  -1   3  -1 1295.59 45.3991   1
  -1   3  -1 1349.84 44.5420   2
   1   3   1 1323.61 43.1379   1
  -2  -3  -1 133.827 5.22660   1
   2  -3   1 125.533 6.93402   2
   2  -3   1 135.370 7.88912   1
  -2  -3  -1 138.411 7.06485   2
   2   3   1 135.514 7.04521   2
   2   3   1 144.637 5.28261   1
  -2   3  -1 135.907 7.01182   2
   3  -3   1 10.3933 3.20072   1
  -3  -3  -1 0.67466 1.04024   2
   3  -3   1 0.73680 1.16055   2
  -3  -3  -1 1.63069 0.65540   1
  -3  -3  -1 1.61871 0.87440   1
  -3   3  -1 1.69042 1.48153   2
  -3   3  -1 1.33149 1.38068   1
   3   3   1 0.44642 1.10900   2
   4  -3   1 335.391 16.9454   1
  -4  -3  -1 383.226 14.1284   1
  -4  -3  -1 354.286 14.1600   1
  -4   3  -1 366.867 16.3351   2
   4   3   1 381.492 16.6505   2
  -4   3  -1 372.214 17.4782   1
  -5  -3  -1 43.2310 3.55185   1
   5  -3   1 27.6150 4.23505   2
  -5  -3  -1 34.2331 3.38638   1
   5   3   1 36.2584 4.51815   2
  -5   3  -1 38.1262 5.16484   1
  -6  -3  -1 42.2416 4.34077   1
   6  -3   1 57.4520 6.12896   2
  -6  -3  -1 46.6109 4.42898   1
   6   3   1 42.2239 5.47773   2
  -6   3  -1 50.3674 6.52401   1
   7  -3   1 257.757 15.4482   2
  -7  -3  -1 266.654 13.1923   1
  -7  -3  -1 261.622 12.8519   1
  -7   3  -1 250.013 15.8057   1
   7   3   1 259.041 15.4219   2
  -8  -3  -1 43.6095 5.73603   1
  -8  -3  -1 47.1773 5.58883   1
   8  -3   1 52.5745 7.45825   2
  -8   3  -1 30.0119 6.48853   1
   8   3   1 41.1385 6.56357   2
  -9  -3  -1 53.9283 6.59845   1
   9  -3   1 43.6560 7.37903   2
  -9   3  -1 40.8252 7.82511   1
   9   3   1 53.5201 7.61955   2
  10  -3   1 -1.9371 2.99447   2
 -10  -3  -1 7.12799 3.36073   1
 -10   3  -1 4.56789 4.37286   1
  10   3   1 8.77565 4.29408   2
 -11  -3  -1 72.3778 9.14621   1
  11  -3   1 64.2856 9.84196   2
 -11   3  -1 51.7275 9.72041   1
  11   3   1 74.6733 10.1200   2
  12  -3   1 17.8308 7.73838   2
 -12  -3  -1 24.0283 6.34425   1
 -12   3  -1 29.0265 8.40303   1
  12   3   1 34.3573 9.50068   2
 -13  -3  -1 80.8730 11.2582   1
  13  -3   1 87.4781 13.7124   2
 -13   3  -1 95.5944 13.9389   1
  13   3   1 95.0730 13.5928   2
  14  -3   1 7.03661 7.81951   2
 -14  -3  -1 6.74679 6.81332   1
  14   3   1 14.4762 8.93417   2
 -14   3  -1 10.8140 7.44169   1
 -15  -3  -1 -6.9231 6.75663   1
  15  -3   1 -6.5470 5.49545   2
 -15   3  -1 -2.0035 7.85237   1
  15   3   1 -4.4458 5.45477   2
  16  -3   1 20.5906 11.0984   2
 -16  -3  -1 14.9366 10.1401   1
  16   3   1 16.8181 8.44903   2
 -16   3  -1 12.0771 11.0761   1
  17  -3   1 7.32469 9.41424   2
  17   3   1 8.13807 10.0482   2
 -17   3  -1 20.3636 12.9454   1
  17  -4  -1 22.6764 10.7083   2
 -17   4   1 1.94579 13.2692   1
  17   4  -1 20.2054 8.71645   2
  16  -4  -1 7.54260 7.98854   2
 -16   4   1 1.26539 8.92244   1
  16   4  -1 -4.1800 5.71134   2
 -15  -4   1 55.3902 9.86271   1
  15  -4  -1 91.5104 14.9676   2
  15   4  -1 32.9200 10.0936   2
  14  -4  -1 196.301 18.2673   2
 -14  -4   1 150.259 13.7691   1
 -14   4   1 198.361 19.3120   1
  14   4  -1 166.325 17.6878   2
  13  -4  -1 5.00432 5.34107   2
 -13  -4   1 8.26905 4.66619   1
 -13   4   1 6.77849 5.85647   1
  13   4  -1 -4.4782 4.56002   2
  12  -4  -1 459.389 27.0755   2
 -12  -4   1 396.512 24.3312   1
  12   4  -1 422.833 26.3169   2
 -12   4   1 461.278 27.0970   1
 -11  -4   1 96.1722 8.73540   1
  11   4  -1 95.9257 13.8006   2
 -11   4   1 89.7252 11.5854   1
 -10  -4   1 31.8148 5.54993   1
  10  -4  -1 32.5951 8.02609   2
 -10   4   1 39.1906 8.26107   1
  10   4  -1 23.6505 6.54026   2
  -9  -4   1 474.512 21.1361   1
   9  -4  -1 483.912 25.3161   2
  -9   4   1 484.550 25.7902   1
   9   4  -1 487.902 25.4842   2
  -8  -4   1 454.408 19.9954   1
   8  -4  -1 515.349 24.4182   2
  -8   4   1 466.574 24.7783   1
   8   4  -1 474.878 23.8210   2
  -7  -4   1 -1.5281 1.61715   1
   7  -4  -1 12.5775 3.43804   2
  -7   4   1 -0.5199 2.36601   1
   7   4  -1 5.55811 2.18797   2
  -6  -4   1 12.1344 2.53295   1
   6  -4  -1 12.1152 3.23584   2
  -6  -4   1 15.6491 2.82581   1
   6   4  -1 19.2113 4.79450   2
  -5  -4   1 318.335 12.5253   1
   5  -4  -1 333.712 15.9865   2
  -5  -4   1 316.539 12.3522   1
  -5   4   1 314.391 16.7070   1
   5   4  -1 329.987 16.0280   2
  -4  -4   1 2.41050 1.88718   2
   4  -4  -1 3.03607 2.05362   1
   4  -4  -1 2.85947 1.44553   2
  -4   4   1 1.22520 1.64737   1
   4   4  -1 -0.6315 1.02518   2
  -4   4   1 -0.8104 1.17648   2
   3  -4  -1 1.27695 1.68873   1
   3  -4  -1 2.60143 1.38933   2
  -3  -4   1 1.81885 1.19759   2
   3   4  -1 0.98486 1.07862   2
  -3   4   1 1.90540 1.36241   2
  -3   4   1 3.25553 1.63642   1
   2  -4  -1 2390.18 82.6122   1
  -2  -4   1 2394.38 81.6723   2
   2  -4  -1 2453.46 81.5579   2
  -2   4   1 2556.30 81.6601   2
  -2   4   1 2376.27 82.7253   1
   2   4  -1 2397.51 78.7549   1
   1  -4  -1 113.503 6.03407   2
   1  -4  -1 106.372 6.43159   1
  -1  -4   1 114.471 6.16799   2
  -1   4   1 108.947 5.86783   2
   1   4  -1 124.008 5.28406   1
  -1   4   1 119.243 6.61866   1
   1   4  -1 115.095 5.37470   1
   1   4  -1 115.828 6.23987   2
   0  -4   1 3.46821 1.11539   1
   0  -4  -1 3.69202 1.04036   1
   0  -4   1 2.44612 0.94770   2
   0  -4  -1 2.85660 1.16209   2
   0   4  -1 5.87035 1.36404   2
   0   4   1 1.88712 1.00307   2
   0   4  -1 3.79660 1.33950   1
   0   4   1 7.13491 1.49724   1
   1  -4   1 867.563 31.1390   2
  -1  -4  -1 867.833 29.7606   1
   1  -4   1 873.757 31.9903   1
   1   4   1 899.729 31.1928   2
  -1   4  -1 846.451 31.9561   1
   1   4   1 892.083 29.7122   1
  -1   4  -1 871.761 31.0741   2
   1   4   1 876.479 31.1956   2
  -2  -4  -1 131.534 5.27896   1
   2  -4   1 136.731 7.41324   2
  -2  -4  -1 139.465 7.45076   2
  -2   4  -1 128.007 7.18328   2
  -2   4  -1 139.168 8.34504   1
   2   4   1 143.556 5.27168   1
  -3  -4  -1 87.5865 3.80252   1
  -3  -4  -1 87.8446 6.16394   2
   3  -4   1 92.4414 7.19333   1
   3   4   1 96.7286 6.29736   2
  -3   4  -1 92.7086 7.14025   1
  -4  -4  -1 561.404 19.0151   1
  -4  -4  -1 517.805 19.0828   1
   4  -4   1 549.044 23.8222   1
  -4   4  -1 517.639 23.9947   2
  -4   4  -1 539.415 23.8475   1
   4   4   1 534.504 22.4576   2
  -5  -4  -1 382.171 14.5915   1
  -5  -4  -1 376.633 14.7886   1
  -5   4  -1 369.322 19.0001   1
   6  -4   1 53.2827 6.40432   2
  -6  -4  -1 60.2749 4.55196   1
  -6  -4  -1 60.8924 4.67118   1
   6   4   1 57.7127 6.17949   2
  -6   4  -1 56.8297 7.14303   1
   7  -4   1 1100.76 44.1635   2
  -7  -4  -1 1084.29 39.4190   1
  -7  -4  -1 1112.80 39.9690   1
  -7   4  -1 1081.71 45.0189   1
  -8  -4  -1 14.9764 3.81478   1
   8  -4   1 37.9980 6.49360   2
  -8  -4  -1 17.0660 3.97841   1
   8   4   1 20.8814 5.28249   2
  -8   4  -1 14.6080 4.94936   1
   9  -4   1 143.702 12.3313   2
  -9  -4  -1 133.682 9.41641   1
  -9   4  -1 121.255 12.2317   1
   9   4   1 146.985 12.3499   2
 -10  -4  -1 91.4658 8.23467   1
  10  -4   1 85.0949 10.1848   2
  10   4   1 99.6095 10.7193   2
 -10   4  -1 70.2407 10.1036   1
  11  -4   1 249.625 19.1920   2
 -11  -4  -1 263.929 15.5141   1
  11   4   1 253.981 18.5547   2
 -11   4  -1 271.194 19.5960   1
  12  -4   1 108.428 14.0961   2
 -12  -4  -1 95.0948 10.6515   1
 -12   4  -1 84.7501 12.6943   1
  12   4   1 119.502 13.9212   2
  13  -4   1 117.629 15.2249   2
 -13  -4  -1 123.026 11.9672   1
 -13   4  -1 120.142 14.5444   1
  13   4   1 128.968 15.2869   2
 -14  -4  -1 6.97473 5.93193   1
  14  -4   1 15.0981 7.61846   2
 -14   4  -1 18.0569 8.52342   1
  14   4   1 13.4301 7.39447   2
  15  -4   1 132.505 17.1017   2
 -15  -4  -1 93.2598 13.5267   1
  15   4   1 105.815 16.2762   2
 -15   4  -1 135.836 23.6909   1
  16  -4   1 46.3561 12.7699   2
 -16   4  -1 58.9173 11.8466   1
  16   4   1 78.2045 17.5274   2
  17  -4   1 17.0603 9.81923   2
  17   4   1 -3.5169 8.76153   2
 -17   4  -1 3.52754 13.4898   1
  17  -5  -1 14.8796 11.5896   2
  17   5  -1 3.26085 9.68226   2
 -17   5   1 16.2590 11.4381   1
  16  -5  -1 61.5282 13.2752   2
  16   5  -1 81.0264 15.5415   2
 -16   5   1 96.8098 19.0689   1
  15  -5  -1 -11.444 5.28646   2
  15   5  -1 2.22488 6.21902   2
  14  -5  -1 81.6225 13.2997   2
 -14   5   1 79.5427 15.0250   1
  14   5  -1 93.9688 13.7373   2
  13  -5  -1 7.61514 6.64083   2
 -13  -5   1 16.8455 5.46728   1
  13   5  -1 8.25180 5.79783   2
  12  -5  -1 383.120 24.0604   2
 -12  -5   1 334.697 17.6484   1
 -12   5   1 372.669 24.9632   1
  12   5  -1 364.886 23.9807   2
 -11  -5   1 -1.6311 2.66141   1
 -11  -5   1 0.67966 5.11110   1
  11  -5  -1 3.05395 3.82010   2
  11   5  -1 6.12532 4.38431   2
 -11   5   1 14.6677 5.38274   1
 -10  -5   1 100.531 8.54059   1
  10  -5  -1 79.4243 9.93494   2
  10   5  -1 79.4754 9.69053   2
 -10   5   1 93.4869 11.4251   1
   9  -5  -1 431.231 23.0661   2
  -9  -5   1 398.381 17.5736   1
   9   5  -1 407.109 22.7227   2
  -9   5   1 378.997 22.8142   1
  -8  -5   1 325.607 14.6962   1
   8  -5  -1 399.835 20.3950   2
  -8  -5   1 338.215 14.6789   1
  -8   5   1 337.664 20.5546   1
   8   5  -1 349.710 19.5706   2
  -7  -5   1 2.98863 1.76420   1
   7  -5  -1 3.54299 2.56998   2
  -7  -5   1 5.36942 1.92927   1
  -7   5   1 4.21320 3.29722   1
   7   5  -1 5.19184 3.01907   2
   6  -5  -1 1408.50 52.6824   2
  -6  -5   1 1366.95 47.2241   1
  -6  -5   1 1433.69 47.2358   1
   6   5  -1 1388.28 52.7189   2
  -6   5   1 1393.30 54.2780   1
  -5  -5   1 629.117 22.2468   1
  -5  -5   1 673.388 22.2982   1
   5  -5  -1 651.966 27.7586   2
  -5   5   1 660.549 28.8945   1
   4  -5  -1 10.9623 3.71786   1
   4  -5  -1 12.0356 2.84112   2
  -4   5   1 8.53144 2.06960   1
   4   5  -1 9.98796 2.86846   2
  -4   5   1 8.42132 2.21754   2
   3  -5  -1 341.608 16.5204   1
  -3  -5   1 344.698 15.5360   2
   3  -5  -1 360.523 15.5207   2
  -3   5   1 361.218 15.4494   2
  -3   5   1 340.559 16.6229   1
   2  -5  -1 0.15178 1.60754   1
   2  -5  -1 3.13033 1.51091   2
   2   5  -1 2.89737 1.51556   2
  -2   5   1 2.62939 1.49947   2
   2   5  -1 2.84182 0.69863   1
   2   5  -1 2.56326 1.24395   2
  -2   5   1 2.70038 1.52999   1
   2   5  -1 6.26904 1.20598   1
   1  -5  -1 16.6368 2.48296   2
  -1  -5   1 14.8083 2.41929   2
   1  -5  -1 18.3179 3.05035   1
  -1   5   1 20.9807 3.02793   1
   1   5  -1 19.7970 2.15626   1
   1   5  -1 17.1947 2.06933   1
   1   5  -1 16.6017 2.54965   2
  -1   5   1 19.4073 2.47525   2
   0  -5  -1 224.232 10.2683   2
   0  -5   1 216.389 10.2359   2
   0  -5  -1 222.567 10.0528   1
   0  -5   1 229.686 10.3457   1
   0   5  -1 211.376 10.0527   2
   0   5   1 233.701 10.0798   1
   0   5  -1 223.407 10.3070   1
   0   5   1 235.219 10.2357   2
  -1  -5  -1 6.47790 1.66317   2
   1  -5   1 4.52382 1.82008   1
  -1  -5  -1 3.97587 1.20051   1
   1  -5   1 1.97594 1.13602   2
  -1   5  -1 6.96771 2.21039   1
   1   5   1 4.74010 1.55484   2
  -1   5  -1 3.68654 1.49453   2
   1   5   1 4.12681 1.20597   1
   2  -5   1 23.8373 4.11255   1
   2  -5   1 22.9748 3.13851   2
  -2  -5  -1 23.5960 1.82816   1
  -2   5  -1 33.8664 4.35846   1
   2   5   1 23.9316 2.88970   2
  -2   5  -1 23.3072 3.16187   2
   2   5   1 27.4649 1.81009   1
  -3  -5  -1 856.354 28.3574   1
   3  -5   1 839.193 32.4423   2
  -3  -5  -1 839.278 32.4511   2
   3  -5   1 831.709 33.9109   1
  -3   5  -1 890.046 34.3345   1
   3   5   1 903.046 32.6880   2
  -4  -5  -1 72.7211 3.22444   1
  -4  -5  -1 71.6010 3.31139   1
   4  -5   1 62.1196 5.73755   2
  -4   5  -1 74.2068 7.04107   1
   4   5   1 64.9355 5.76788   2
  -5  -5  -1 383.795 15.1073   1
   5  -5   1 409.713 19.2872   2
  -5  -5  -1 431.164 15.1245   1
  -5   5  -1 438.536 21.4574   1
   5   5   1 418.248 19.4558   2
  -6  -5  -1 2017.28 68.9772   1
   6  -5   1 2061.40 74.3558   2
  -6  -5  -1 2147.39 68.8631   1
   6   5   1 1929.25 73.8094   2
  -6   5  -1 2103.74 76.2609   1
  -7  -5  -1 476.286 18.7645   1
  -7  -5  -1 482.122 19.0511   1
   7  -5   1 481.890 23.7087   2
  -7   5  -1 474.581 24.8182   1
   7   5   1 471.134 23.3612   2
  -8  -5  -1 561.985 22.3139   1
   8  -5   1 545.287 27.1983   2
   8   5   1 548.658 27.0321   2
  -8   5  -1 551.460 28.5180   1
   9  -5   1 259.930 17.5304   2
  -9  -5  -1 239.007 12.5803   1
  -9  -5  -1 257.398 12.9114   1
   9   5   1 235.831 16.4944   2
  -9   5  -1 253.241 17.9551   1
 -10  -5  -1 2.91201 3.52421   1
  10  -5   1 1.82626 3.70336   2
 -10   5  -1 5.00729 4.36907   1
  10   5   1 -0.7646 3.30520   2
 -11  -5  -1 0.25195 3.20192   1
  11  -5   1 8.99831 4.89110   2
  11   5   1 3.03071 3.53828   2
 -11   5  -1 4.56795 4.41244   1
  12  -5   1 74.4411 12.2210   2
 -12  -5  -1 77.4653 9.00426   1
  12   5   1 69.0529 11.2988   2
 -12   5  -1 72.3442 12.1830   1
  13  -5   1 25.1176 8.12847   2
 -13   5  -1 44.0803 10.6717   1
  13   5   1 40.7842 9.29725   2
  14  -5   1 139.073 17.1624   2
 -14   5  -1 166.926 19.5538   1
  14   5   1 193.055 19.1717   2
  15  -5   1 80.8619 15.3568   2
 -15  -5  -1 100.549 17.2519   1
  15   5   1 98.7570 16.0058   2
  16  -5   1 55.5991 12.6563   2
  16   5   1 53.2613 13.7288   2
 -16   5  -1 50.3731 13.7962   1
  17  -5   1 49.2842 14.4308   2
 -17   5  -1 52.2397 15.6961   1
  17   5   1 25.3230 10.9563   2
  17  -6  -1 267.089 33.8061   2
 -17   6   1 251.863 26.6638   1
  17   6  -1 238.088 24.4760   2
  16  -6  -1 18.7253 8.29673   2
  16   6  -1 19.6908 8.79181   2
 -16   6   1 36.5635 12.4838   1
  15  -6  -1 14.3565 8.89666   2
 -15   6   1 13.9882 9.66341   1
  15   6  -1 24.7695 9.33766   2
 -14  -6   1 2.80031 4.78793   1
  14  -6  -1 -3.1297 5.10741   2
  14   6  -1 -2.8108 5.72400   2
 -14   6   1 -2.8148 6.71614   1
 -13  -6   1 6.50151 4.13703   1
  13  -6  -1 1.68654 4.61667   2
  13   6  -1 -3.0841 3.91898   2
 -13   6   1 11.3735 7.13263   1
 -12  -6   1 3.76777 3.45340   1
 -12  -6   1 -1.0848 4.51861   1
  12  -6  -1 1.40069 3.93662   2
  12   6  -1 6.74376 4.97337   2
 -12   6   1 7.09566 6.42472   1
 -11  -6   1 1291.11 48.6147   1
 -11  -6   1 1303.88 47.2863   1
  11  -6  -1 1301.16 56.0094   2
  11   6  -1 1340.39 56.4697   2
 -11   6   1 1331.92 57.5335   1
  10  -6  -1 66.1929 9.14814   2
 -10  -6   1 87.7104 9.61457   1
 -10   6   1 88.3791 11.0284   1
  10   6  -1 63.2515 9.46651   2
  -9  -6   1 37.1703 4.33412   1
  -9  -6   1 40.8267 4.47282   1
   9  -6  -1 39.6255 7.16853   2
   9   6  -1 44.6421 7.07909   2
  -9   6   1 32.7910 8.08899   1
  -8  -6   1 35.3541 3.75066   1
  -8  -6   1 29.9132 3.63051   1
   8  -6  -1 44.0423 6.21127   2
  -8   6   1 41.5517 7.73654   1
   8   6  -1 34.8002 6.36811   2
   7  -6  -1 1257.77 48.3045   2
  -7  -6   1 1247.70 41.1767   1
  -7  -6   1 1165.51 41.0981   1
   7   6  -1 1206.57 48.1735   2
  -7   6   1 1221.00 50.2024   1
   6  -6  -1 265.369 15.0249   2
  -6   6   1 268.265 16.4815   1
   6   6  -1 270.083 15.1758   2
   5  -6  -1 1248.05 46.6920   2
   5   6  -1 1219.10 46.8022   2
  -5   6   1 1245.95 49.2687   1
   4  -6  -1 639.104 26.0539   2
   4   6  -1 626.272 26.0858   2
  -4   6   1 632.629 27.6822   1
  -3  -6   1 26.3938 3.80104   2
   3  -6  -1 22.7997 3.30426   2
   3  -6  -1 23.8550 4.51818   1
   3   6  -1 26.7879 3.65145   2
  -3   6   1 23.5992 4.22693   1
  -3   6   1 32.7524 3.78317   2
   2  -6  -1 1.76320 1.40958   2
   2  -6  -1 -1.1378 1.40475   1
   2   6  -1 1.95022 0.87935   1
  -2   6   1 5.99812 2.00734   2
   2   6  -1 4.05835 1.10942   1
  -2   6   1 3.13519 1.93835   1
   2   6  -1 1.39390 1.28598   2
   2   6  -1 2.38376 1.46883   2
   1  -6  -1 5664.51 195.480   1
   1  -6  -1 5966.65 195.084   2
   1   6  -1 6282.95 193.920   1
   1   6  -1 6032.54 193.987   1
  -1   6   1 5677.19 195.523   1
  -1   6   1 5948.76 194.910   2
   0  -6   1 2.67187 1.40501   2
   0  -6   1 1.33829 1.43802   1
   0  -6  -1 2.63056 1.33887   1
   0   6  -1 3.80235 1.61648   1
   0   6   1 2.25201 1.32428   2
   0   6  -1 2.56552 1.47637   2
   0   6   1 2.10516 1.16626   1
   1  -6   1 3728.08 130.269   1
   1  -6   1 3925.44 129.626   2
  -1  -6  -1 4033.20 129.731   2
  -1  -6  -1 4053.44 128.105   1
  -1   6  -1 3788.17 130.416   1
   1   6   1 4028.50 127.937   1
  -1   6  -1 3651.78 130.922   2
   2  -6   1 0.95902 1.47549   1
  -2  -6  -1 0.35979 0.81822   1
   2  -6   1 1.34204 1.32479   2
  -2   6  -1 4.01923 1.87775   1
  -2   6  -1 -0.9295 0.94201   2
   2   6   1 0.72317 0.63258   1
   2   6   1 -1.3303 1.12593   2
   2   6   1 0.53226 0.83147   2
  -3  -6  -1 282.641 9.90188   1
  -3  -6  -1 289.123 13.9629   2
  -3   6  -1 275.792 13.5143   2
   3   6   1 291.001 13.9358   2
  -3   6  -1 285.551 15.2607   1
   4  -6   1 75.9153 6.67238   2
  -4   6  -1 83.8539 7.84616   1
   4   6   1 84.0749 6.79421   2
   5  -6   1 -0.4077 1.47321   2
   5   6   1 -0.0991 1.48208   2
  -5   6  -1 0.04248 2.03080   1
  -6  -6  -1 43.9908 2.94438   1
   6  -6   1 44.9605 6.12783   2
  -6  -6  -1 46.5494 3.13064   1
  -6   6  -1 46.9141 6.93886   1
   6   6   1 47.2274 5.98279   2
  -7  -6  -1 2211.10 73.6206   1
   7  -6   1 2190.20 80.5452   2
  -7  -6  -1 2141.42 73.2953   1
   7   6   1 2194.31 80.5111   2
  -7   6  -1 2287.82 83.0945   1
  -8  -6  -1 451.962 18.0651   1
  -8  -6  -1 460.571 18.0692   1
   8  -6   1 458.679 23.9590   2
  -8   6  -1 458.921 25.4427   1
  -9  -6  -1 207.136 10.5687   1
  -9  -6  -1 218.758 10.8069   1
   9  -6   1 245.884 16.6206   2
  -9   6  -1 211.752 16.6243   1
   9   6   1 212.219 15.6233   2
  10  -6   1 0.96407 3.04664   2
  10   6   1 2.38218 4.50334   2
 -10   6  -1 3.39432 3.92388   1
  11  -6   1 425.857 25.7667   2
 -11  -6  -1 396.130 18.6732   1
 -11  -6  -1 408.577 18.6736   1
 -11   6  -1 444.810 26.9621   1
  11   6   1 424.184 25.5322   2
  12  -6   1 10.4047 6.46696   2
 -12  -6  -1 5.60546 3.75006   1
 -12  -6  -1 -4.8159 5.18182   1
  12   6   1 9.67752 4.79302   2
 -12   6  -1 11.5003 6.18046   1
  13  -6   1 -4.7536 4.86162   2
 -13  -6  -1 -4.1480 3.94237   1
  13   6   1 2.54773 5.30061   2
 -13   6  -1 5.35856 6.66347   1
  14  -6   1 40.3370 10.2161   2
 -14  -6  -1 39.2424 6.79256   1
  14   6   1 40.1518 9.91292   2
 -14   6  -1 49.6595 12.2813   1
  15  -6   1 181.835 20.3994   2
  15   6   1 169.053 20.1799   2
 -15   6  -1 150.351 24.9862   1
  16  -6   1 17.8130 9.36966   2
 -16   6  -1 -0.5873 10.3030   1
  16   6   1 2.00537 8.60996   2
  17  -6   1 28.2721 11.6343   2
 -17   6  -1 50.8063 16.4207   1
  17   6   1 73.3950 15.7142   2
  17   7  -1 -7.4768 7.66954   2
 -17   7   1 3.89451 10.3690   1
  16  -7  -1 12.2889 7.98246   2
  16   7  -1 19.3097 9.17835   2
  15  -7  -1 6.57152 6.18461   2
 -15   7   1 -5.2030 7.49368   1
  15   7  -1 -4.1344 5.19557   2
  14  -7  -1 102.903 15.3964   2
  14   7  -1 115.104 15.8661   2
 -14   7   1 136.488 17.6323   1
 -13  -7   1 5.07466 2.97239   1
  13  -7  -1 7.49097 6.02382   2
 -13   7   1 -1.7712 5.81723   1
  13   7  -1 5.45358 5.72604   2
  12  -7  -1 269.137 20.4975   2
 -12  -7   1 254.340 11.7811   1
  12   7  -1 304.547 21.4076   2
  11  -7  -1 5.27472 4.80689   2
 -11  -7   1 4.80001 2.68797   1
 -11  -7   1 5.06937 2.37085   1
 -11   7   1 6.71920 5.48950   1
  11   7  -1 7.64113 4.54604   2
 -10  -7   1 82.2568 5.26029   1
 -10  -7   1 96.7274 5.44239   1
  10  -7  -1 95.0648 10.8825   2
  10   7  -1 98.5766 10.9840   2
 -10   7   1 83.2456 11.6708   1
   9  -7  -1 148.530 12.1938   2
  -9  -7   1 115.403 5.77304   1
  -9  -7   1 125.281 5.90212   1
  -9   7   1 142.588 13.5191   1
   9   7  -1 134.648 12.0355   2
   8  -7  -1 826.386 37.4324   2
   8   7  -1 879.151 38.0470   2
  -8   7   1 888.264 40.1144   1
   7  -7  -1 49.2714 6.69233   2
   7   7  -1 37.8811 6.06537   2
  -7   7   1 18.0741 5.25768   1
   6  -7  -1 6.80020 3.11152   2
  -6   7   1 3.50639 3.01511   1
   6   7  -1 8.76215 2.89313   2
   5  -7  -1 43.4612 5.56819   2
   5   7  -1 42.4995 5.46515   2
  -5   7   1 34.2426 5.50566   1
   4  -7  -1 405.950 18.6058   2
  -4   7   1 393.831 20.2096   1
   4   7  -1 396.104 18.6549   2
   3  -7  -1 21.8942 3.39840   2
  -3   7   1 26.4881 4.68260   1
  -3   7   1 19.5681 3.59914   2
   3   7  -1 24.8792 1.57614   1
   3   7  -1 21.7266 3.49417   2
   3   7  -1 21.5877 1.62848   1
   2  -7  -1 3769.37 124.768   2
   2  -7  -1 3589.89 125.740   1
   2   7  -1 3582.34 124.929   2
   2   7  -1 3920.19 121.870   1
   2   7  -1 3653.34 121.843   1
   2   7  -1 3671.15 124.922   2
  -2   7   1 3781.28 124.566   2
   1  -7  -1 325.157 16.6929   1
   1  -7  -1 353.884 15.2505   2
  -1  -7   1 327.836 15.2152   2
  -1  -7   1 339.134 14.2369   1
   1   7  -1 343.906 14.2153   1
  -1   7   1 327.692 15.4306   1
  -1   7   1 333.158 14.8655   2
   1   7  -1 338.333 15.2571   2
   0  -7   1 944.286 34.7862   1
   0  -7   1 931.548 35.0080   2
   0  -7  -1 951.486 34.9158   2
   0  -7  -1 950.375 34.4729   1
   0   7  -1 888.095 34.4841   2
   0   7   1 935.601 34.5788   2
   0   7   1 930.967 34.2981   1
   0   7  -1 963.635 34.9080   1
  -1  -7  -1 478.973 19.3780   2
   1  -7   1 418.526 19.4943   1
   1  -7   1 462.158 19.2947   2
  -1  -7  -1 452.609 17.7343   1
  -1   7  -1 444.458 18.8267   2
  -1   7  -1 440.860 19.7296   1
   1   7   1 450.338 19.0132   2
   1   7   1 462.808 17.6930   1
  -2  -7  -1 83.0232 4.51528   1
   2  -7   1 71.7889 5.95015   2
   2  -7   1 64.5035 6.65444   1
   2   7   1 83.1158 6.36451   2
   2   7   1 73.9649 5.96244   2
  -2   7  -1 80.4896 6.98460   1
  -2   7  -1 69.0761 5.74143   2
   2   7   1 79.4293 4.28554   1
   3  -7   1 124.863 8.34344   2
  -3  -7  -1 117.697 4.93943   1
   3   7   1 131.340 8.46427   2
  -3   7  -1 125.502 9.51177   1
   3   7   1 111.797 4.76767   1
   4  -7   1 131.679 30.0915   3
  -4   7  -1 206.816 31.4698   3
   5  -7   1 35.3749 5.23056   2
   5   7   1 38.0483 5.28934   2
  -5   7  -1 38.3552 6.58540   1
   6  -7   1 1047.54 41.3506   2
   6   7   1 1005.73 40.9321   2
  -6   7  -1 978.061 43.0209   1
   7  -7   1 29.1433 5.61736   2
  -7  -7  -1 26.3727 1.94834   1
   7   7   1 24.7055 4.94560   2
  -7   7  -1 31.0996 7.40610   1
  -8  -7  -1 168.918 8.29190   1
  -8  -7  -1 183.601 7.50257   1
   8  -7   1 176.330 13.7529   2
  -8   7  -1 173.473 14.5637   1
   8   7   1 173.315 13.2658   2
   9  -7   1 190.792 14.9266   2
  -9  -7  -1 180.656 8.22333   1
  -9  -7  -1 175.419 8.11841   1
   9   7   1 167.457 13.8448   2
  -9   7  -1 178.754 15.3259   1
 -10  -7  -1 18.9061 3.35815   1
  10  -7   1 17.1936 6.04079   2
 -10  -7  -1 16.6911 2.94641   1
  10   7   1 7.61403 4.18430   2
 -10   7  -1 4.87617 4.45899   1
  11  -7   1 208.910 17.3281   2
 -11  -7  -1 197.447 9.85268   1
 -11  -7  -1 182.644 9.92804   1
 -11   7  -1 212.710 18.3367   1
  11   7   1 223.365 17.6878   2
  12  -7   1 391.905 26.7791   2
 -12  -7  -1 409.412 17.0193   1
  12   7   1 412.281 26.5830   2
 -12   7  -1 457.980 28.4773   1
 -13  -7  -1 8.33546 3.64544   1
  13  -7   1 13.3840 6.88774   2
 -13   7  -1 18.7664 7.66560   1
  13   7   1 3.25648 4.91074   2
  14  -7   1 21.4334 9.50271   2
 -14   7  -1 14.1359 8.98751   1
  14   7   1 17.1234 8.54156   2
  15  -7   1 82.1201 21.7784   2
 -15   7  -1 68.3873 17.5653   1
  15   7   1 113.424 28.4972   2
  16  -7   1 126.064 18.0899   2
  16   7   1 122.132 19.0530   2
  17  -7   1 -5.9116 9.26092   2
 -17   7  -1 -9.9252 13.7161   1
  17   7   1 -0.4438 8.83190   2
  17   8  -1 9.91874 8.27593   2
  16  -8  -1 24.0974 10.5715   2
  16   8  -1 16.9673 10.3002   2
  15  -8  -1 1.20678 7.28140   2
 -15   8   1 -16.231 7.22618   1
  15   8  -1 0.68838 6.21697   2
  14  -8  -1 7.90932 6.29544   2
 -14   8   1 21.5490 9.35503   1
  14   8  -1 2.59956 6.14786   2
  13  -8  -1 247.984 21.1992   2
  13   8  -1 262.355 20.8228   2
 -13   8   1 240.821 22.3825   1
  12  -8  -1 32.8289 9.21120   2
 -12   8   1 26.7301 9.33801   1
  12   8  -1 22.3052 6.37966   2
  11  -8  -1 1.78353 4.52075   2
  11   8  -1 1.29821 3.70121   2
 -11   8   1 4.87853 5.41583   1
  10  -8  -1 41.0854 7.80339   2
  10   8  -1 58.4011 8.76085   2
 -10   8   1 45.8659 9.98255   1
   9  -8  -1 3.44095 2.94388   2
  -9   8   1 3.96881 4.10013   1
   9   8  -1 5.58701 3.91185   2
   8  -8  -1 178.386 13.5463   2
  -8   8   1 178.321 15.3551   1
   8   8  -1 174.997 13.3796   2
   7  -8  -1 1806.83 68.4769   2
  -7   8   1 1853.93 71.4263   1
   7   8  -1 1793.32 68.4214   2
   6  -8  -1 76.6678 7.54928   2
   6   8  -1 75.1488 7.72021   2
  -6   8   1 93.0225 9.64704   1
   5  -8  -1 3.60785 1.82781   2
  -5   8   1 4.98038 2.67057   1
   5   8  -1 6.22667 2.56499   2
   4  -8  -1 705.662 29.3783   2
   4   8  -1 667.468 29.1101   2
  -4   8   1 741.264 31.7456   1
   3  -8  -1 1751.16 61.7563   2
  -3   8   1 1685.82 63.5004   1
   3   8  -1 1774.75 56.8493   1
   3   8  -1 1632.24 56.8734   1
   3   8  -1 1752.66 62.0845   2
   2  -8  -1 52.6122 5.12161   2
   2  -8  -1 53.7420 5.84574   1
  -2   8   1 74.8190 5.83362   2
   2   8  -1 57.2715 4.17621   1
  -2   8   1 59.3550 6.14672   1
   2   8  -1 56.9626 5.48556   2
   2   8  -1 67.6227 4.35130   1
   1  -8  -1 1078.51 38.3553   2
   1  -8  -1 1016.94 38.5995   1
  -1  -8   1 1000.89 36.9504   1
  -1  -8   1 1019.76 38.4175   2
   1   8  -1 969.770 37.9417   2
   1   8  -1 1037.00 36.9957   1
  -1   8   1 1004.62 38.5655   1
  -1   8   1 1019.27 37.8873   2
   0  -8  -1 186.111 10.2423   2
   0  -8   1 178.939 10.2683   2
   0  -8  -1 180.935 9.92951   1
   0   8   1 162.767 9.67269   2
   0   8  -1 192.848 10.2390   1
   0   8   1 190.825 9.89253   1
   0   8  -1 165.148 9.74024   2
   1  -8   1 1232.05 45.1436   2
   1  -8   1 1176.81 45.6015   1
  -1  -8  -1 1263.80 43.5569   1
  -1  -8  -1 1300.03 45.4475   2
  -1   8  -1 1164.29 45.6011   1
   1   8   1 1212.16 44.8296   2
   1   8   1 1264.93 43.4176   1
  -1   8  -1 1197.06 44.6995   2
   2  -8   1 2.08204 1.83426   2
  -2  -8  -1 0.97653 1.20892   1
   2  -8   1 -2.0372 1.97358   1
   2   8   1 1.69809 1.13576   1
  -2   8  -1 2.63164 2.12708   1
   2   8   1 0.98007 0.94978   2
  -3  -8  -1 635.659 22.2058   1
   3  -8   1 641.768 26.7336   2
  -3   8  -1 632.929 28.4023   1
   3   8   1 635.477 22.0261   1
   4  -8   1 27.5191 4.58275   2
   4   8   1 26.1466 4.17341   2
  -4   8  -1 23.8943 5.73744   1
   5  -8   1 343.685 18.1896   2
  -5   8  -1 364.245 20.3569   1
   5   8   1 347.988 18.1653   2
   6  -8   1 2.35871 2.55683   2
  -6   8  -1 3.45395 3.11319   1
   6   8   1 4.75739 2.32190   2
   7  -8   1 5.42363 2.83813   2
  -7   8  -1 5.25569 3.25023   1
   7   8   1 5.05132 2.86712   2
   8  -8   1 313.732 19.4807   2
  -8   8  -1 349.474 21.9315   1
   8   8   1 322.642 19.5235   2
   9  -8   1 184.025 15.0010   2
   9   8   1 174.056 14.1594   2
  -9   8  -1 176.142 15.8666   1
  10  -8   1 -0.8485 3.73052   2
  10   8   1 3.42688 4.97016   2
 -10   8  -1 -2.0043 4.27502   1
  11  -8   1 85.2135 12.0989   2
  11   8   1 99.9504 12.1318   2
 -11   8  -1 85.7828 13.0967   1
  12  -8   1 176.980 17.3741   2
 -12   8  -1 174.533 18.0023   1
  12   8   1 160.425 16.3355   2
  13  -8   1 8.18730 6.25681   2
 -13   8  -1 13.1078 7.60510   1
  13   8   1 19.4031 8.21116   2
  14  -8   1 113.941 16.0480   2
  14   8   1 78.6602 14.3717   2
 -14   8  -1 106.705 17.8499   1
  15  -8   1 5.35306 8.58005   2
 -15   8  -1 12.9836 10.5445   1
  15   8   1 13.1021 7.87830   2
  16  -8   1 27.3968 9.79725   2
  16   8   1 10.6565 9.41563   2
  17  -8   1 6.72224 9.50337   2
 -17   8  -1 -0.3317 13.7480   1
  17   8   1 0.59372 8.37671   2
 -17   9   1 19.6668 14.8940   1
  17   9  -1 13.7164 10.0148   2
  16  -9  -1 -3.8701 7.43350   2
 -16   9   1 -0.3312 12.8715   1
  16   9  -1 -5.7396 6.90854   2
  15  -9  -1 71.8777 22.3831   2
 -15   9   1 80.2368 16.6285   1
  15   9  -1 42.9215 13.6979   2
  14  -9  -1 19.2937 7.39905   2
  14   9  -1 14.5317 7.65777   2
 -14   9   1 19.9569 9.48631   1
  13  -9  -1 9.33081 7.12799   2
  13   9  -1 4.29796 4.70746   2
 -13   9   1 16.4216 7.83747   1
  12  -9  -1 298.866 22.3648   2
 -12   9   1 295.389 23.7600   1
  12   9  -1 259.500 20.8643   2
  11  -9  -1 13.6013 5.95864   2
  11   9  -1 13.9569 5.28108   2
  10  -9  -1 -2.2421 3.36218   2
  10   9  -1 0.49952 5.15753   2
 -10   9   1 2.12258 4.21015   1
   9  -9  -1 11.9675 5.45085   2
  -9   9   1 13.6005 5.87255   1
   9   9  -1 11.4282 4.39036   2
   8  -9  -1 1053.79 44.8502   2
  -8   9   1 1073.84 47.8374   1
   8   9  -1 1032.06 44.6503   2
   7  -9  -1 26.9639 5.50901   2
   7   9  -1 24.2220 6.04020   2
  -7   9   1 21.4576 5.96422   1
   6  -9  -1 53.3546 6.59144   2
  -6   9   1 65.8499 8.68093   1
   6   9  -1 59.6684 7.24893   2
   5  -9  -1 66.0322 6.86962   2
   5   9  -1 80.8230 7.60946   2
  -5   9   1 80.8838 8.88774   1
   4  -9  -1 298.747 16.1182   2
   4   9  -1 316.890 16.6476   2
  -4   9   1 314.296 18.2014   1
   3  -9  -1 303.800 17.0225   2
   3   9  -1 227.621 15.7116   2
   3   9  -1 260.383 10.8559   1
   3   9  -1 298.156 10.9826   1
   2  -9  -1 576.263 24.7291   2
  -2  -9   1 558.765 24.7351   2
  -2   9   1 593.037 25.8938   1
   2   9  -1 546.575 24.8315   2
   2   9  -1 614.918 22.3446   1
   2   9  -1 593.796 22.2986   1
   1  -9  -1 539.220 22.8728   2
   1  -9  -1 533.757 23.2051   1
  -1  -9   1 499.356 21.5037   1
  -1  -9   1 518.934 22.9586   2
  -1   9   1 553.389 23.4088   1
   1   9  -1 551.365 21.7158   1
   0  -9  -1 158.322 10.0004   2
   0  -9   1 165.778 10.1626   2
   0  -9   1 159.975 9.83708   1
   0  -9  -1 165.091 9.71398   1
   0   9  -1 150.781 9.54704   1
   0   9   1 173.822 9.69799   1
  -1  -9  -1 289.294 13.0858   1
   1  -9   1 264.521 14.0180   2
  -1  -9  -1 280.424 14.3122   2
   1  -9   1 253.860 14.4201   1
   1   9   1 276.507 12.6658   1
  -1   9  -1 283.486 14.7651   1
  -2  -9  -1 1619.52 55.2909   1
   2  -9   1 1563.87 58.2961   2
   2   9   1 1652.77 58.7601   2
  -2   9  -1 1557.91 59.7500   1
   2   9   1 1631.83 55.1038   1
   3  -9   1 205.423 12.3323   2
  -3  -9  -1 222.621 9.14546   1
   3   9   1 226.641 12.7871   2
  -3   9  -1 210.888 14.0962   1
   3   9   1 206.996 8.78745   1
   4  -9   1 4.63420 2.76530   2
   4   9   1 4.82752 2.06245   2
  -4   9  -1 9.53757 3.77312   1
   5  -9   1 79.0728 7.98490   2
  -5   9  -1 99.2617 9.87704   1
   6  -9   1 169.925 12.2726   2
   6   9   1 180.056 12.5297   2
  -6   9  -1 178.909 14.2100   1
   7  -9   1 187.217 13.5400   2
   7   9   1 170.850 12.9706   2
  -7   9  -1 191.193 15.6427   1
   8  -9   1 8.06352 4.06152   2
   8   9   1 7.94814 4.27944   2
  -8   9  -1 1.78192 3.28743   1
   9  -9   1 5.00422 3.59173   2
  -9   9  -1 -3.5620 4.16608   1
   9   9   1 0.14537 3.61182   2
  10  -9   1 78.1101 10.5728   2
  10   9   1 94.5899 11.6396   2
 -10   9  -1 88.7606 13.3339   1
  11  -9   1 0.76918 3.80376   2
 -11   9  -1 12.2009 7.00944   1
  11   9   1 3.89597 3.41272   2
  12  -9   1 282.813 21.5797   2
  12   9   1 247.147 20.6059   2
 -12   9  -1 254.738 21.3661   1
  13  -9   1 79.7705 12.5677   2
 -13   9  -1 94.3072 16.1809   1
  13   9   1 74.9715 12.5854   2
  14  -9   1 72.1983 14.3410   2
  14   9   1 28.6581 10.2973   2
 -14   9  -1 43.4577 12.3252   1
  15  -9   1 1.30297 6.80471   2
  15   9   1 1.10036 6.29016   2
 -15   9  -1 -1.8789 8.91475   1
  16  -9   1 -1.0049 7.01137   2
  16   9   1 11.3452 8.87875   2
  16 -10  -1 15.0586 7.89479   2
  16  10  -1 8.46494 8.40888   2
  15 -10  -1 -1.8722 7.78089   2
 -15  10   1 -14.626 8.47879   1
  15  10  -1 6.57410 6.19915   2
  14 -10  -1 213.439 20.3743   2
 -14  10   1 216.730 22.7330   1
  14  10  -1 140.793 18.1042   2
  13 -10  -1 56.6702 12.6611   2
 -13  10   1 55.1088 13.4962   1
  13  10  -1 55.3685 11.4044   2
  12 -10  -1 135.327 15.1962   2
 -12  10   1 155.326 18.4996   1
  12  10  -1 152.523 15.3520   2
  11 -10  -1 32.0769 8.66619   2
  11  10  -1 19.7203 7.00582   2
 -11  10   1 26.8060 8.32336   1
  10 -10  -1 137.624 14.5631   2
 -10  10   1 159.845 15.4816   1
  10  10  -1 161.188 14.5751   2
   9 -10  -1 1201.14 49.4439   2
  -9  10   1 1132.04 51.5659   1
   9  10  -1 1032.27 47.7411   2
   8 -10  -1 77.6699 9.24437   2
  -8  10   1 67.0117 10.2849   1
   8  10  -1 65.7515 8.62772   2
   7 -10  -1 74.9249 8.18687   2
  -7  10   1 79.5514 10.1587   1
   7  10  -1 85.2006 8.97508   2
   6 -10  -1 116.710 9.89693   2
  -6  10   1 103.568 11.0471   1
   6  10  -1 99.2706 9.40788   2
   5 -10  -1 511.972 24.3182   2
  -5  10   1 507.896 26.5330   1
   5  10  -1 517.785 24.7344   2
   4 -10  -1 598.526 26.3411   2
   4  10  -1 574.388 19.5244   1
  -4  10   1 588.036 28.3353   1
   3 -10  -1 1043.86 40.8086   2
   3  10  -1 1020.32 36.1750   1
   3  10  -1 1063.23 36.1386   1
  -3  10   1 1017.72 42.4200   1
   3  10  -1 1037.88 41.1787   2
  -2 -10   1 530.197 24.1122   2
  -2  10   1 540.124 24.9497   1
   2  10  -1 539.719 21.4781   1
   2  10  -1 558.907 21.5171   1
  -1 -10   1 1291.58 49.8764   2
  -1 -10   1 1276.63 49.8072   1
   1 -10  -1 1359.26 49.8346   2
  -1  10   1 1374.39 50.3010   1
   1  10  -1 1356.98 48.3614   1
   0 -10   1 383.247 18.4545   1
   0 -10   1 394.174 18.9948   2
   0 -10  -1 393.333 18.3270   1
   0 -10  -1 423.609 19.2655   2
   0  10  -1 400.038 18.6010   1
   0  10   1 387.154 18.0802   1
  -1 -10  -1 2.05432 1.54589   2
   1 -10   1 2.02328 2.25868   2
   1  10   1 3.55006 1.74710   1
  -1  10  -1 2.16974 1.84773   1
   2 -10   1 478.960 21.5959   2
  -2 -10  -1 462.195 18.6521   1
   2  10   1 471.612 18.4333   1
   2  10   1 413.633 20.8726   2
  -2  10  -1 454.248 22.6865   1
   3 -10   1 246.455 14.4515   2
  -3 -10  -1 258.085 10.9933   1
  -3  10  -1 278.977 16.5272   1
   3  10   1 259.625 14.7088   2
   3  10   1 239.605 10.5779   1
   4 -10   1 767.331 33.6158   2
   4  10   1 799.150 27.1634   1
   4  10   1 834.826 26.6876   1
   4  10   1 799.779 33.8148   2
  -4  10  -1 784.833 36.0496   1
   5 -10   1 10.1270 4.07351   2
   5  10   1 15.8933 4.46362   2
  -5  10  -1 11.8262 4.95425   1
   6 -10   1 184.726 13.0359   2
   6  10   1 167.092 12.4630   2
  -6  10  -1 174.189 14.5397   1
   7 -10   1 41.5655 6.95626   2
  -7  10  -1 24.6508 6.29728   1
   7  10   1 25.5305 5.88102   2
   8 -10   1 5.30722 3.46148   2
   8  10   1 10.1927 4.16078   2
  -8  10  -1 8.52458 5.08416   1
   9 -10   1 1319.69 55.9224   2
   9  10   1 1282.11 55.2419   2
  -9  10  -1 1372.66 59.3593   1
  10 -10   1 39.1791 9.31290   2
 -10  10  -1 23.7552 7.84430   1
  10  10   1 57.0018 9.44117   2
  11 -10   1 71.9812 11.9546   2
 -11  10  -1 91.4059 13.3973   1
  11  10   1 71.0920 10.8072   2
  12 -10   1 7.47502 5.79464   2
  12  10   1 14.7707 6.94432   2
 -12  10  -1 8.36166 6.95431   1
  13 -10   1 64.1880 14.6910   2
  13  10   1 55.9829 11.4001   2
 -13  10  -1 56.1285 12.8842   1
  14 -10   1 52.8977 13.4348   2
  14  10   1 51.3702 12.2065   2
 -14  10  -1 51.8701 13.0856   1
  15 -10   1 113.412 18.3256   2
  15  10   1 86.4090 15.2565   2
 -15  10  -1 115.601 21.1131   1
  16 -10   1 5.46467 9.19378   2
  16  10   1 10.6397 8.29708   2
  16 -11  -1 97.7878 18.3083   2
  16  11  -1 131.022 17.8329   2
  15 -11  -1 76.0145 15.3557   2
  15  11  -1 80.6806 14.5742   2
 -15  11   1 58.1456 13.4122   1
  14 -11  -1 97.5039 15.5188   2
 -14  11   1 172.338 20.4343   1
  14  11  -1 92.6113 15.9354   2
  13 -11  -1 88.6461 13.5243   2
 -13  11   1 72.1482 16.1840   1
  13  11  -1 73.1079 13.5079   2
  12 -11  -1 11.8501 7.07986   2
 -12  11   1 25.6026 9.45533   1
  12  11  -1 28.7893 8.60459   2
  11 -11  -1 50.2594 10.4848   2
 -11  11   1 87.9265 13.7023   1
  11  11  -1 84.0995 11.6971   2
  10 -11  -1 851.671 40.2587   2
  10  11  -1 731.258 38.4977   2
 -10  11   1 892.858 59.2261   1
   9 -11  -1 14.9228 5.18019   2
   9  11  -1 10.9676 4.29526   2
  -9  11   1 16.9840 6.52836   1
   8 -11  -1 229.964 15.8640   2
  -8  11   1 180.809 16.3478   1
   8  11  -1 197.243 15.2134   2
   7 -11  -1 5.61010 3.47720   2
   7  11  -1 1.53075 1.87512   2
  -7  11   1 2.53866 3.77805   1
   6 -11  -1 28.8001 5.75707   2
  -6  11   1 23.7083 6.74920   1
   6  11  -1 28.0944 5.72935   2
   5 -11  -1 325.984 17.7979   2
  -5  11   1 289.187 19.1476   1
   5  11  -1 301.321 17.6528   2
   4 -11  -1 3191.79 108.039   2
   4  11  -1 2934.86 100.248   1
   4  11  -1 3101.72 108.246   2
   4  11  -1 3055.26 100.221   1
  -4  11   1 3076.71 110.573   1
   3 -11  -1 1484.62 56.9265   2
  -3  11   1 1534.20 59.0994   1
   3  11  -1 1518.46 57.6387   2
   3  11  -1 1543.08 52.3255   1
   3  11  -1 1523.17 52.4503   1
   2 -11  -1 42.1153 5.71915   2
  -2 -11   1 37.3832 5.64370   2
   2  11  -1 40.4429 4.47484   1
  -2  11   1 50.0706 6.20133   1
   2  11  -1 47.8064 4.56626   1
  -1 -11   1 2282.57 83.7485   1
  -1 -11   1 2544.31 86.2854   2
   1 -11  -1 2456.58 85.7150   2
  -1  11   1 2420.80 85.8724   1
   1  11  -1 2388.27 83.8357   1
   0 -11  -1 1737.04 61.2193   2
   0 -11   1 1522.99 59.7233   1
   0 -11  -1 1614.61 59.7931   1
   0 -11   1 1650.77 60.9482   2
   0  11  -1 1674.07 60.4019   1
   0  11   1 1698.93 59.9657   1
  -1 -11  -1 69.0311 7.00795   2
  -1 -11  -1 82.7289 6.73541   1
   1 -11   1 72.8234 7.21912   2
   1  11   1 73.4971 6.16099   1
  -1  11  -1 64.7453 7.04981   1
   2 -11   1 1301.42 49.0478   2
  -2 -11  -1 1276.04 45.6412   1
   2  11   1 1245.85 48.8305   2
   2  11   1 1279.87 45.2423   1
  -2  11  -1 1238.90 49.9640   1
  -3 -11  -1 69.2201 4.96800   1
   3 -11   1 67.7931 7.31471   2
   3  11   1 66.1565 4.64939   1
   3  11   1 67.7105 6.93638   2
  -3  11  -1 71.2738 8.19728   1
   4 -11   1 28.6621 5.38662   2
   4  11   1 30.2480 2.45858   1
  -4  11  -1 40.1225 6.92206   1
   4  11   1 26.4451 2.30469   1
   4  11   1 36.4328 5.48723   2
   5 -11   1 0.69271 1.77977   2
   5  11   1 -0.6624 1.70897   2
  -5  11  -1 -4.3062 2.01244   1
   6 -11   1 20.2587 5.33582   2
  -6  11  -1 23.7279 6.86912   1
   7 -11   1 41.5257 6.89566   2
  -7  11  -1 36.2477 8.58554   1
   7  11   1 43.2714 6.76266   2
   8 -11   1 722.628 34.9796   2
  -8  11  -1 741.024 38.3511   1
   8  11   1 710.412 34.4690   2
   9 -11   1 95.3798 11.3743   2
  -9  11  -1 89.7581 12.4831   1
   9  11   1 103.830 11.3664   2
  10 -11   1 253.314 19.1347   2
  10  11   1 210.208 17.3837   2
 -10  11  -1 216.322 19.9990   1
  11 -11   1 1.83605 4.67484   2
  11  11   1 7.23703 5.63118   2
 -11  11  -1 1.61625 5.99356   1
  12 -11   1 41.6654 10.7006   2
 -12  11  -1 65.2385 13.6495   1
  12  11   1 67.0431 11.8090   2
  13 -11   1 3.53001 5.64434   2
  13  11   1 12.4855 7.46841   2
 -13  11  -1 7.91293 7.92999   1
  14 -11   1 140.449 18.1310   2
 -14  11  -1 152.027 20.8723   1
  14  11   1 112.933 16.2487   2
  15 -11   1 -20.043 6.15757   2
  15  11   1 2.30257 6.39459   2
 -15  11  -1 7.07724 9.44015   1
  16 -11   1 57.0633 15.0786   2
  16  11   1 80.6996 17.8444   2
  16 -12  -1 21.3398 10.1864   2
 -16  12   1 3.84357 11.0660   1
  16  12  -1 15.5320 9.99784   2
  15 -12  -1 135.517 18.7374   2
  15  12  -1 124.220 17.4715   2
 -15  12   1 129.201 21.0710   1
  14 -12  -1 37.8769 10.2552   2
 -14  12   1 11.7024 9.35354   1
  14  12  -1 18.6950 8.92098   2
  13 -12  -1 25.2476 7.70486   2
  13  12  -1 38.3070 11.1663   2
 -13  12   1 23.9006 11.1522   1
  12 -12  -1 69.4246 11.5678   2
 -12  12   1 42.8502 9.69688   1
  12  12  -1 56.8999 10.6817   2
  11 -12  -1 35.7700 9.75316   2
 -11  12   1 34.0761 9.58756   1
  11  12  -1 40.2981 9.74765   2
  10 -12  -1 320.320 22.0731   2
  10  12  -1 359.102 23.3055   2
 -10  12   1 333.112 25.4582   1
   9 -12  -1 468.408 27.4290   2
   9  12  -1 526.618 33.6339   2
  -9  12   1 511.484 30.8327   1
   8 -12  -1 308.648 20.0311   2
  -8  12   1 338.651 23.1738   1
   8  12  -1 298.629 19.8403   2
   7 -12  -1 65.5808 8.58908   2
  -7  12   1 88.7604 11.1722   1
   7  12  -1 63.4524 8.46720   2
   6 -12  -1 163.971 12.7193   2
  -6  12   1 204.067 16.3439   1
   6  12  -1 178.005 13.5226   2
   5 -12  -1 155.566 12.0376   2
  -5  12   1 177.754 14.4660   1
   4 -12  -1 18.5925 4.93420   2
   4  12  -1 20.6325 2.43766   1
   4  12  -1 18.1520 4.58367   2
  -4  12   1 16.5052 4.30124   1
   4  12  -1 20.3967 2.45618   1
   3 -12  -1 1537.61 58.6715   2
   3  12  -1 1563.43 53.9127   1
   3  12  -1 1517.18 53.6206   1
  -3  12   1 1601.14 60.9905   1
   3  12  -1 1525.74 59.0555   2
   2 -12  -1 50.5096 6.54771   2
  -2 -12   1 61.9956 7.08347   2
  -2  12   1 54.7245 6.86559   1
   2  12  -1 67.8885 5.57979   1
   2  12  -1 61.9545 5.58239   1
   1 -12  -1 259.193 14.7599   2
   1  12  -1 222.556 12.6912   1
   1  12  -1 251.466 13.3336   1
  -1  12   1 239.551 16.3515   1
   0 -12   1 2316.27 82.5758   2
   0 -12  -1 2332.50 82.4883   2
   0  12  -1 2303.63 81.7169   1
   0  12   1 2211.62 80.8928   1
  -1 -12  -1 172.360 10.5797   1
   1 -12   1 177.159 11.9896   2
  -1 -12  -1 162.442 11.3405   2
   1  12   1 170.119 10.3108   1
  -1  12  -1 158.787 13.4311   1
   2 -12   1 624.491 27.6364   2
  -2 -12  -1 582.932 25.9732   1
   2  12   1 612.565 27.5333   2
  -2  12  -1 579.762 28.0568   1
   2  12   1 603.934 24.0107   1
  -3 -12  -1 110.913 6.91745   1
   3 -12   1 119.475 9.86870   2
  -3  12  -1 110.664 10.3210   1
   3  12   1 93.4859 8.84778   2
   3  12   1 108.571 6.51522   1
   4 -12   1 530.941 25.3900   2
  -4  12  -1 547.334 27.8424   1
   4  12   1 486.367 18.4369   1
   4  12   1 516.445 18.6289   1
   4  12   1 497.342 24.8880   2
   5 -12   1 426.805 22.6583   2
  -5  12  -1 438.870 25.2863   1
   6 -12   1 44.3521 7.31411   2
   6  12   1 39.4214 6.66219   2
  -6  12  -1 51.5815 8.54191   1
   7 -12   1 85.5134 10.2943   2
  -7  12  -1 89.0400 12.4168   1
   7  12   1 129.051 11.4124   2
   8 -12   1 0.18113 3.50361   2
  -8  12  -1 -1.1763 3.41686   1
   8  12   1 0.81957 2.69780   2
   9 -12   1 405.021 25.2256   2
   9  12   1 374.721 24.5405   2
  -9  12  -1 343.088 26.0352   1
  10 -12   1 492.530 29.7073   2
  10  12   1 545.761 30.1473   2
 -10  12  -1 512.530 32.6719   1
  11 -12   1 39.1294 8.55326   2
 -11  12  -1 29.1861 9.10344   1
  11  12   1 49.5892 11.0722   2
  12 -12   1 2.72503 5.24369   2
  12  12   1 -3.7827 4.38416   2
 -12  12  -1 0.04436 5.72207   1
  13 -12   1 80.7688 13.9751   2
 -13  12  -1 86.7796 17.6504   1
  13  12   1 73.6565 13.7252   2
  14 -12   1 22.0406 9.16279   2
 -14  12  -1 11.6917 8.97848   1
  14  12   1 8.73306 8.72993   2
  15 -12   1 50.9524 13.9223   2
 -15  12  -1 21.0335 16.2591   1
  15  12   1 82.0931 15.4815   2
  16 -12   1 43.1062 13.1757   2
 -16  12  -1 47.2919 17.2179   1
  16  12   1 48.0295 12.4795   2
  16 -13  -1 -2.8691 15.6927   2
  16  13  -1 -15.987 7.28741   2
 -16  13   1 -1.1382 10.4597   1
  15 -13  -1 -3.9963 7.02965   2
  15  13  -1 8.72163 8.92411   2
  14 -13  -1 246.250 23.3141   2
 -14  13   1 231.723 25.2009   1
  14  13  -1 224.724 25.6909   2
  13 -13  -1 14.1012 6.97061   2
 -13  13   1 7.71427 8.85149   1
  13  13  -1 10.8974 7.02461   2
  12 -13  -1 1.08119 5.68517   2
  12  13  -1 -3.0455 4.52341   2
 -12  13   1 -9.6332 5.88748   1
  11 -13  -1 15.4579 6.76285   2
  11  13  -1 3.54860 5.31182   2
 -11  13   1 14.6123 8.93763   1
  10 -13  -1 472.030 28.6939   2
  10  13  -1 493.539 29.2316   2
 -10  13   1 527.307 32.8421   1
   9 -13  -1 46.5437 10.0465   2
   9  13  -1 29.7991 7.99030   2
  -9  13   1 31.5251 8.46956   1
   8 -13  -1 130.202 12.9187   2
   8  13  -1 146.530 13.3192   2
  -8  13   1 137.441 15.4446   1
   7 -13  -1 12.2538 4.29704   2
   7  13  -1 3.93601 3.46815   2
  -7  13   1 11.7111 4.85521   1
   6 -13  -1 86.7092 9.27845   2
   6  13  -1 90.3441 9.46316   2
  -6  13   1 88.5133 10.6155   1
   5 -13  -1 43.5212 7.14112   2
   5  13  -1 41.9804 6.92915   2
  -5  13   1 42.0146 8.31666   1
   4 -13  -1 527.395 25.3062   2
   4  13  -1 498.743 18.8021   1
   4  13  -1 531.134 25.7768   2
   4  13  -1 499.876 18.9853   1
  -4  13   1 469.042 26.5545   1
   3 -13  -1 76.3085 7.88384   2
   3  13  -1 63.7922 7.48637   2
   3  13  -1 63.2995 5.36805   1
  -3  13   1 66.1526 8.05601   1
   3  13  -1 69.2233 5.40424   1
  -2 -13   1 17.2941 4.23475   2
   2 -13  -1 20.9786 4.85453   2
   2  13  -1 18.1119 3.84759   1
   2  13  -1 15.4344 4.10219   1
  -2  13   1 22.9839 4.74085   1
   1 -13  -1 318.007 17.6677   2
  -1 -13   1 305.527 17.5233   2
   1  13  -1 294.371 18.3461   1
  -1  13   1 321.109 17.6274   1
   1  13  -1 320.375 16.3488   1
   0 -13   1 118.590 10.0436   2
   0 -13  -1 121.344 9.90268   2
   0  13  -1 114.151 9.32422   1
   0  13   1 112.271 9.14071   1
  -1 -13  -1 202.425 13.1760   2
  -1 -13  -1 174.530 11.6320   1
   1 -13   1 207.499 13.6496   2
  -1  13  -1 198.075 13.3908   1
   1  13   1 195.354 11.5095   1
  -2 -13  -1 36.5442 5.78748   2
   2 -13   1 36.6227 6.02483   2
  -2 -13  -1 33.6894 5.11357   1
   2  13   1 45.9563 4.72715   1
   2  13   1 50.5215 6.27569   2
  -2  13  -1 42.2495 6.47184   1
  -3 -13  -1 12.2702 3.00218   1
   3 -13   1 20.0269 5.37511   2
  -3  13  -1 19.6530 5.20146   1
   3  13   1 13.8217 2.93249   1
   3  13   1 15.6025 4.09752   2
   4 -13   1 404.217 21.7390   2
   4  13   1 380.746 15.5319   1
  -4  13  -1 424.599 24.3074   1
   4  13   1 410.175 15.7522   1
   4  13   1 442.165 22.4986   2
   5 -13   1 33.3809 6.06184   2
   5  13   1 36.7020 6.43376   2
  -5  13  -1 24.0829 6.67955   1
   6 -13   1 8.63720 3.95112   2
   6  13   1 23.9735 5.98296   2
  -6  13  -1 9.94263 5.07840   1
   7 -13   1 3.17337 3.43538   2
  -7  13  -1 0.41220 4.95858   1
   7  13   1 4.90922 3.67535   2
   8 -13   1 46.9382 8.32856   2
  -8  13  -1 33.8860 8.16065   1
   8  13   1 39.2281 8.64397   2
   9 -13   1 95.3932 12.5610   2
   9  13   1 77.7847 10.2613   2
  -9  13  -1 96.5264 13.5655   1
  10 -13   1 14.4285 6.04384   2
  10  13   1 20.4285 6.82883   2
 -10  13  -1 18.7104 6.58303   1
  11 -13   1 -0.3095 4.80928   2
  11  13   1 12.5903 6.11990   2
 -11  13  -1 7.75418 6.40106   1
  12 -13   1 67.7711 11.1253   2
  12  13   1 37.5625 9.16942   2
 -12  13  -1 51.7598 13.3799   1
  13 -13   1 28.7897 9.76068   2
  13  13   1 20.2560 8.43254   2
 -13  13  -1 16.2402 11.0521   1
  14 -13   1 23.6900 10.0475   2
  14  13   1 29.6933 10.0754   2
 -14  13  -1 19.1662 11.1970   1
  15 -13   1 2.54418 8.93504   2
 -15  13  -1 -5.5306 9.53461   1
  15  13   1 3.69694 7.87106   2
  16 -13   1 18.6943 12.1251   2
 -16  13  -1 29.8713 16.7591   1
  16  13   1 35.7334 11.5335   2
  16 -14  -1 21.8459 16.4206   2
  16  14  -1 10.6631 9.55172   2
 -16  14   1 -3.2385 11.2178   1
  15 -14  -1 124.214 19.1097   2
  15  14  -1 121.297 18.4286   2
  14 -14  -1 -1.0448 7.07094   2
 -14  14   1 15.6016 11.1895   1
  14  14  -1 3.21554 6.55046   2
  13 -14  -1 44.7790 11.9968   2
  13  14  -1 31.7118 9.35861   2
 -13  14   1 23.6617 10.8017   1
  12 -14  -1 21.1741 9.11993   2
 -12  14   1 17.7064 9.28570   1
  12  14  -1 24.2843 8.34393   2
  11 -14  -1 138.747 15.8223   2
  11  14  -1 161.945 16.5896   2
 -11  14   1 180.678 19.3848   1
  10 -14  -1 124.944 14.3652   2
  10  14  -1 150.590 15.3198   2
 -10  14   1 130.986 16.2957   1
   9 -14  -1 84.3321 11.3878   2
  -9  14   1 65.5703 12.4305   1
   9  14  -1 97.2869 11.4229   2
   8 -14  -1 95.2876 11.6461   2
  -8  14   1 108.197 13.6567   1
   8  14  -1 96.9323 11.0882   2
   7 -14  -1 3.73451 3.30088   2
   7  14  -1 15.2745 5.56059   2
  -7  14   1 4.88460 4.72946   1
   6 -14  -1 4.68815 3.59484   2
  -6  14   1 2.01499 4.74784   1
   6  14  -1 0.42326 2.87484   2
   5 -14  -1 1063.58 44.6557   2
  -5  14   1 1032.33 47.5442   1
   5  14  -1 1033.72 44.7650   2
   4 -14  -1 548.060 26.8901   2
   4  14  -1 517.486 20.2686   1
   4  14  -1 532.987 26.9890   2
  -4  14   1 522.968 28.3660   1
   4  14  -1 540.636 20.5686   1
   3 -14  -1 93.4838 9.12481   2
   3  14  -1 95.7635 9.51006   2
  -3  14   1 79.5268 9.46932   1
   3  14  -1 98.4697 7.09093   1
   2 -14  -1 637.549 29.1219   2
  -2 -14   1 647.495 29.6756   2
   2  14  -1 588.439 25.7366   1
  -2  14   1 628.110 29.8376   1
   2  14  -1 623.739 26.1637   1
  -1 -14   1 606.655 28.6410   2
   1 -14  -1 632.743 28.6157   2
   1  14  -1 581.563 26.4287   1
  -1  14   1 603.177 28.1909   1
   0 -14   1 1329.05 53.5147   2
   0 -14  -1 1365.27 53.3895   2
   0  14  -1 1347.06 52.5645   1
   0  14   1 1370.84 52.4809   1
   1 -14   1 40.8113 6.49216   2
  -1 -14  -1 36.6707 6.13104   2
   1  14   1 45.4828 5.53488   1
  -1  14  -1 34.6975 6.32439   1
   2 -14   1 17.4807 4.90231   2
  -2 -14  -1 19.8618 5.14834   2
  -2 -14  -1 19.7298 4.41843   1
   2  14   1 21.7461 3.90718   1
   2  14   1 15.6780 3.89991   2
  -2  14  -1 17.3721 4.76581   1
   3 -14   1 2.46277 2.10578   2
  -3  14  -1 -3.4853 2.16372   1
   3  14   1 0.60008 1.83074   1
   3  14   1 -1.7350 1.80036   2
   4 -14   1 128.344 11.3965   2
  -4  14  -1 142.985 13.4310   1
   4  14   1 139.264 7.29607   1
   4  14   1 164.282 12.6927   2
   4  14   1 124.747 7.09649   1
   5 -14   1 27.0862 6.30197   2
   5  14   1 26.4889 6.64185   2
  -5  14  -1 23.2820 6.78212   1
   6 -14   1 5.60020 3.86339   2
  -6  14  -1 0.79957 3.54109   1
   6  14   1 5.76803 3.48780   2
   7 -14   1 2.07123 4.10231   2
  -7  14  -1 -7.4328 3.68247   1
   7  14   1 -2.6602 2.63348   2
   9 -14   1 21.7661 6.15844   2
  -9  14  -1 23.9885 8.72151   1
   9  14   1 10.9919 5.05595   2
  10 -14   1 481.288 29.3222   2
 -10  14  -1 498.848 32.2868   1
  10  14   1 427.894 27.8704   2
  11 -14   1 30.6145 8.73655   2
 -11  14  -1 31.6435 10.9234   1
  11  14   1 18.2973 6.91001   2
  12 -14   1 -7.0975 5.90745   2
  12  14   1 -0.4848 5.58375   2
 -12  14  -1 -0.0556 7.26625   1
  13 -14   1 -4.5852 6.72151   2
 -13  14  -1 16.5663 9.18168   1
  13  14   1 8.28446 6.65262   2
  14 -14   1 86.0382 16.9540   2
 -14  14  -1 77.9234 17.6600   1
  14  14   1 102.110 16.5529   2
  15 -14   1 -11.044 7.69949   2
  15  14   1 3.09175 9.33984   2
  15 -15  -1 20.8814 11.6226   2
 -15  15   1 97.2959 20.8494   1
  15  15  -1 41.8294 12.1480   2
  14 -15  -1 4.51020 7.39279   2
  14  15  -1 3.02745 6.77510   2
  13 -15  -1 139.203 17.7831   2
 -13  15   1 166.074 22.6868   1
  13  15  -1 155.528 17.7590   2
  12 -15  -1 37.4229 9.79215   2
  12  15  -1 50.4014 11.4295   2
 -12  15   1 52.2150 13.5356   1
  11 -15  -1 109.079 13.6078   2
 -11  15   1 112.231 16.9063   1
  11  15  -1 70.5220 12.2722   2
  10 -15  -1 152.421 15.8943   2
 -10  15   1 143.758 17.6597   1
  10  15  -1 163.105 15.7636   2
   9 -15  -1 190.333 16.6657   2
  -9  15   1 213.415 20.3923   1
   9  15  -1 202.648 17.3157   2
   8 -15  -1 -3.9944 3.28354   2
   8  15  -1 -3.1705 3.36198   2
  -8  15   1 3.34830 4.86729   1
   7 -15  -1 39.5959 9.09428   2
  -7  15   1 48.0737 10.9506   1
   7  15  -1 37.3554 7.47766   2
   6 -15  -1 536.555 28.1756   2
   6  15  -1 520.922 28.1861   2
  -6  15   1 539.899 31.1026   1
   5 -15  -1 91.3829 9.93370   2
   5  15  -1 92.4982 9.92182   2
  -5  15   1 89.7804 11.5291   1
   4 -15  -1 22.4163 5.93873   2
  -4  15   1 20.4135 5.66178   1
   4  15  -1 25.0626 3.99220   1
   4  15  -1 28.6512 6.86036   2
   4  15  -1 22.0798 3.65856   1
   3 -15  -1 2110.17 78.5351   2
  -3  15   1 2111.56 80.3118   1
   3  15  -1 2051.47 72.8139   1
   3  15  -1 2099.64 73.1950   1
  -2 -15   1 1169.10 47.5672   2
   2 -15  -1 1155.13 47.1968   2
   2  15  -1 1136.12 43.5961   1
  -2  15   1 1095.15 47.3451   1
   1 -15  -1 384.030 21.1676   2
  -1 -15   1 401.913 21.7289   2
  -1  15   1 386.799 21.0384   1
   0 -15   1 472.853 24.5302   2
   0 -15  -1 460.556 23.8190   2
   0  15  -1 471.478 23.5043   1
   0  15   1 460.743 22.9191   1
   1 -15   1 1.05417 2.34428   2
  -1 -15  -1 3.07501 2.82379   2
  -1  15  -1 2.60722 2.99203   1
   1  15   1 6.88466 2.93409   1
   2 -15   1 216.408 14.9653   2
  -2 -15  -1 220.314 15.0101   2
   2  15   1 202.249 11.8385   1
  -2  15  -1 199.184 14.9745   1
   2  15   1 217.614 15.0705   2
   3 -15   1 10.2049 3.84560   2
   3  15   1 5.86019 2.41233   1
   3  15   1 2.98760 2.58395   1
   3  15   1 3.87946 2.53990   2
  -3  15  -1 8.57638 4.26829   1
   4 -15   1 11.0775 4.83940   2
   4  15   1 22.5881 5.76289   2
   4  15   1 30.3939 3.90067   1
  -4  15  -1 11.2674 5.08879   1
   4  15   1 15.3367 3.05395   1
   5 -15   1 36.9368 7.44330   2
   5  15   1 35.9682 7.03128   2
  -5  15  -1 24.3315 7.78154   1
   6 -15   1 1.76141 3.17141   2
   6  15   1 8.49171 4.08531   2
  -6  15  -1 0.91244 3.73126   1
   7 -15   1 87.4498 10.7403   2
  -7  15  -1 71.5164 12.3750   1
   7  15   1 92.7343 10.8181   2
   8 -15   1 3.85946 4.87823   2
  -8  15  -1 -3.7071 3.92551   1
   8  15   1 2.62205 3.01840   2
   9 -15   1 23.1068 6.67264   2
   9  15   1 22.6527 7.63230   2
  -9  15  -1 16.9368 6.50173   1
  10 -15   1 -0.4367 4.73255   2
  10  15   1 8.15895 4.85831   2
 -10  15  -1 6.64321 6.52164   1
  11 -15   1 110.689 14.1327   2
  11  15   1 93.2818 13.4993   2
 -11  15  -1 95.4537 17.3804   1
  12 -15   1 159.443 18.1873   2
 -12  15  -1 144.446 21.0304   1
  12  15   1 136.054 16.7545   2
  13 -15   1 16.3308 8.31806   2
 -13  15  -1 9.58701 9.53430   1
  13  15   1 17.3871 8.63013   2
  14 -15   1 27.8578 11.1487   2
 -14  15  -1 16.1409 13.2549   1
  14  15   1 7.84345 7.39367   2
  15 -15   1 7.03179 9.55637   2
 -15  15  -1 46.7791 14.9082   1
  15  15   1 20.4157 11.8321   2
  15 -16  -1 15.3279 11.0334   2
  15  16  -1 34.9604 12.5154   2
 -15  16   1 55.3692 13.0995   1
  14 -16  -1 92.3949 17.5877   2
  14  16  -1 105.159 16.6323   2
 -14  16   1 130.717 21.8997   1
  13 -16  -1 17.3155 8.47228   2
 -13  16   1 8.08050 10.0943   1
  13  16  -1 26.6511 11.1499   2
  12 -16  -1 356.288 27.0315   2
 -12  16   1 372.925 31.0092   1
  12  16  -1 373.714 27.5655   2
  11 -16  -1 8.06204 6.90238   2
  11  16  -1 6.93004 5.31055   2
 -11  16   1 7.87075 8.15384   1
  10 -16  -1 210.942 18.8300   2
  10  16  -1 240.312 19.5241   2
 -10  16   1 195.583 20.2658   1
   9 -16  -1 36.2750 9.66650   2
  -9  16   1 47.8650 11.9326   1
   9  16  -1 34.9369 8.70143   2
   8 -16  -1 272.592 20.1033   2
  -8  16   1 254.758 21.8020   1
   8  16  -1 286.783 20.6752   2
   7 -16  -1 18.4852 5.01891   2
   7  16  -1 28.6701 10.1939   2
   6 -16  -1 82.2725 10.3320   2
   6  16  -1 73.6707 9.60943   2
  -6  16   1 94.0582 13.0194   1
   5 -16  -1 45.4725 7.75920   2
   5  16  -1 56.0658 3.53930   1
  -5  16   1 62.8457 9.82436   1
   5  16  -1 65.4077 9.10511   2
   5  16  -1 59.7438 3.59178   1
   4 -16  -1 343.841 20.5444   2
   4  16  -1 327.184 14.7650   1
  -4  16   1 323.590 21.6233   1
   4  16  -1 328.849 20.7608   2
   3 -16  -1 679.317 32.3622   2
   3  16  -1 685.680 32.8380   2
  -3  16   1 693.181 33.7861   1
   3  16  -1 684.657 27.7771   1
   3  16  -1 627.998 27.0737   1
   2 -16  -1 929.119 41.1488   2
  -2 -16   1 911.090 41.2187   2
  -2  16   1 958.113 41.8635   1
   2  16  -1 959.200 37.8712   1
  -1 -16   1 1.59039 3.11846   2
   1 -16  -1 -1.3586 2.63865   2
   1  16  -1 4.18401 2.88952   1
  -1  16   1 4.63121 2.72155   1
   0 -16  -1 136.537 11.9794   2
   0 -16   1 137.474 12.1567   2
   0  16   1 152.116 11.5320   1
   0  16  -1 136.974 11.4989   1
  -1 -16  -1 24.1558 6.23529   2
   1 -16   1 14.3014 4.99868   2
  -1  16  -1 24.9465 6.39866   1
   1  16   1 29.3913 5.05808   1
  -2 -16  -1 1670.76 64.0594   2
   2 -16   1 1642.69 64.1174   2
   2  16   1 1620.00 59.3857   1
  -2  16  -1 1536.28 64.4191   1
   3 -16   1 69.0211 9.11570   2
   3  16   1 62.3778 8.52413   2
   3  16   1 78.8800 9.99276   1
   3  16   1 68.9771 6.60196   1
  -3  16  -1 60.7654 9.31287   1
   4 -16   1 874.819 39.4161   2
   4  16   1 865.169 31.6597   1
   4  16   1 829.390 31.4541   1
  -4  16  -1 835.137 41.3855   1
   5 -16   1 85.7773 10.1462   2
   5  16   1 69.4634 8.96393   2
   5  16   1 66.2311 3.59589   1
   5  16   1 68.4544 3.59629   1
  -5  16  -1 67.5121 10.7743   1
   6 -16   1 112.732 12.3229   2
   6  16   1 113.806 11.8777   2
  -6  16  -1 114.068 14.3945   1
   7 -16   1 5.94315 4.86536   2
   7  16   1 1.28827 3.12630   2
  -7  16  -1 15.3553 7.87715   1
   8 -16   1 154.332 14.7836   2
   8  16   1 156.752 14.9827   2
  -8  16  -1 177.473 19.1700   1
   9 -16   1 68.9278 11.3347   2
   9  16   1 83.5903 11.5603   2
  -9  16  -1 66.9800 13.6696   1
  10 -16   1 6.85582 6.44300   2
 -10  16  -1 12.6933 7.32250   1
  10  16   1 19.7739 7.42288   2
  11 -16   1 5.36560 4.77653   2
  11  16   1 -0.6787 4.45338   2
 -11  16  -1 8.71174 7.11362   1
  12 -16   1 89.7334 15.1746   2
 -12  16  -1 47.6234 14.7322   1
  12  16   1 83.7026 14.0884   2
  13 -16   1 5.93879 15.0139   2
 -13  16  -1 0.73509 9.53091   1
  13  16   1 -1.9213 7.41111   2
  14 -16   1 40.4628 12.7531   2
  14  16   1 42.2201 12.3388   2
 -14  16  -1 98.5907 21.0535   1
  15 -16   1 20.9469 11.0248   2
  15  16   1 41.7742 13.0809   2
 -15  16  -1 24.1694 13.7436   1
  15 -17  -1 9.38804 10.5452   2
  15  17  -1 8.81285 9.20750   2
 -15  17   1 14.6759 12.0150   1
  14 -17  -1 15.9848 10.3139   2
 -14  17   1 -2.0355 10.5908   1
  14  17  -1 6.76850 7.62206   2
  13 -17  -1 27.2612 12.5581   2
 -13  17   1 43.1949 16.9275   1
  13  17  -1 23.5299 9.63909   2
  12 -17  -1 3.52769 7.04998   2
  12  17  -1 5.24413 5.52510   2
 -12  17   1 0.09768 7.18874   1
  11 -17  -1 2.69451 6.01997   2
 -11  17   1 8.10706 8.50166   1
  11  17  -1 4.88214 5.57685   2
  10 -17  -1 54.7813 11.2105   2
  10  17  -1 43.4177 10.5668   2
 -10  17   1 80.1313 15.3232   1
   9 -17  -1 21.7910 6.64112   2
  -9  17   1 18.0584 9.01248   1
   9  17  -1 22.8349 7.42790   2
   8 -17  -1 50.2464 10.3195   2
   8  17  -1 48.8841 9.93999   2
  -8  17   1 34.6537 10.4391   1
   7 -17  -1 235.125 18.6010   2
   7  17  -1 231.223 18.3800   2
  -7  17   1 264.121 22.1006   1
   6 -17  -1 2.01060 3.34639   2
   6  17  -1 -0.9210 3.39504   2
  -6  17   1 -2.1847 3.38020   1
   5 -17  -1 39.5111 7.64408   2
  -5  17   1 29.5488 7.25019   1
   5  17  -1 32.6795 3.33881   1
   5  17  -1 29.4884 8.00356   2
   5  17  -1 30.1294 3.45081   1
   4 -17  -1 31.9523 6.53592   2
   4  17  -1 33.1285 5.11939   1
   4  17  -1 37.0862 7.20990   2
   4  17  -1 33.4595 4.72573   1
  -4  17   1 37.6625 8.75518   1
   3 -17  -1 42.8888 7.83639   2
   3  17  -1 50.5130 7.54523   2
  -3  17   1 46.0035 8.07961   1
   2 -17  -1 140.862 12.4135   2
  -2 -17   1 178.244 14.4003   2
  -2  17   1 155.477 13.5727   1
   1 -17  -1 52.3875 8.07559   2
  -1 -17   1 57.2753 8.62811   2
   1  17  -1 52.9991 7.29722   1
  -1  17   1 69.5109 8.82607   1
   0 -17  -1 16.2237 5.16915   2
   0 -17   1 33.7564 7.49561   2
   0  17   1 33.5449 6.20255   1
   0  17  -1 34.2535 6.35405   1
   1 -17   1 1323.72 53.5099   2
  -1 -17  -1 1286.02 52.9208   2
  -1  17  -1 1216.10 52.3679   1
   1  17   1 1243.61 49.6652   1
   2 -17   1 62.9520 8.57819   2
  -2 -17  -1 77.1109 9.62886   2
   2  17   1 60.0909 11.4698   1
  -2  17  -1 81.4465 10.1136   1
   2  17   1 73.6659 9.44145   2
   3 -17   1 77.8998 9.85188   2
  -3  17  -1 93.8148 10.8947   1
   3  17   1 56.1602 8.77981   2
   3  17   1 60.4279 7.04922   1
   4 -17   1 31.0666 7.38188   2
  -4  17  -1 20.8693 6.20531   1
   4  17   1 23.4140 4.06390   1
   4  17   1 19.5887 5.69686   2
   5 -17   1 5.20054 3.58191   2
   5  17   1 10.4496 1.84611   1
   5  17   1 8.41297 3.67147   2
   5  17   1 7.47949 1.74294   1
  -5  17  -1 11.7345 5.60327   1
   6 -17   1 186.143 17.2537   2
  -6  17  -1 204.911 19.5494   1
   6  17   1 213.031 17.1126   2
   7 -17   1 202.063 17.3642   2
  -7  17  -1 204.438 19.9783   1
   7  17   1 166.427 15.0168   2
   8 -17   1 384.660 26.2319   2
  -8  17  -1 438.748 30.5464   1
   8  17   1 464.113 27.8068   2
   9 -17   1 29.8324 8.01429   2
   9  17   1 33.9383 8.73824   2
  -9  17  -1 66.1832 12.8432   1
  10 -17   1 9.51127 4.99602   2
  10  17   1 1.59965 5.14138   2
 -10  17  -1 6.70574 6.66016   1
  11 -17   1 526.358 33.6782   2
  11  17   1 510.767 32.6169   2
 -11  17  -1 512.071 36.8620   1
  12 -17   1 205.422 21.8331   2
  12  17   1 187.099 19.5358   2
 -12  17  -1 180.974 23.3558   1
  13 -17   1 43.9039 11.5458   2
 -13  17  -1 25.8993 16.2005   1
  13  17   1 46.0906 12.6459   2
  14 -17   1 56.2710 14.5892   2
  14  17   1 42.1379 11.0058   2
 -14  17  -1 38.4328 15.2359   1
  15 -17   1 11.9839 12.0367   2
  15  17   1 21.8149 11.3578   2
 -15  17  -1 6.37556 12.0632   1
  14 -18  -1 13.8656 10.0057   2
  14  18  -1 19.7390 10.5769   2
 -14  18   1 26.1648 13.0358   1
  13 -18  -1 -2.6747 6.52660   2
 -13  18   1 -3.7797 8.02899   1
  13  18  -1 -1.7721 6.41761   2
  12 -18  -1 13.2601 7.29512   2
  12  18  -1 29.4419 9.74450   2
 -12  18   1 37.3190 11.9922   1
  11 -18  -1 17.8724 7.08323   2
  11  18  -1 35.1633 10.6781   2
 -11  18   1 35.2880 10.6644   1
  10 -18  -1 25.1099 7.49686   2
 -10  18   1 31.9579 11.6343   1
  10  18  -1 9.56462 6.66746   2
   9 -18  -1 168.464 16.3482   2
  -9  18   1 137.801 18.0900   1
   9  18  -1 151.395 15.9656   2
   8 -18  -1 198.347 17.6877   2
  -8  18   1 176.175 20.3802   1
   8  18  -1 222.253 18.4676   2
   7 -18  -1 75.9343 11.0274   2
  -7  18   1 53.2012 13.1190   1
   7  18  -1 49.5012 9.30843   2
   6 -18  -1 644.564 34.5453   2
   6  18  -1 660.525 34.3933   2
  -6  18   1 609.325 36.7709   1
  -5  18   1 405.745 26.4668   1
   5  18  -1 403.378 15.5829   1
   5  18  -1 395.291 24.4240   2
   5  18  -1 378.297 15.3942   1
   4 -18  -1 -1.6951 3.01258   2
  -4  18   1 7.54757 3.94355   1
   4  18  -1 2.34741 3.98799   2
   4  18  -1 -0.5307 2.90587   1
   3 -18  -1 159.270 14.0369   2
   3  18  -1 163.674 13.8645   2
  -3  18   1 159.465 14.7807   1
   2 -18  -1 1042.95 45.4775   2
  -2 -18   1 1055.92 46.0967   2
  -2  18   1 983.063 45.5819   1
   2  18  -1 1021.16 41.7706   1
   1 -18  -1 18.0802 5.86195   2
  -1 -18   1 11.9707 4.67191   2
   1  18  -1 18.9193 5.45581   1
  -1  18   1 16.8367 4.60047   1
   0 -18  -1 47.8100 8.34448   2
   0 -18   1 56.8273 9.10966   2
   0  18   1 58.1598 7.87079   1
   0  18  -1 37.9192 7.18116   1
   1 -18   1 129.871 12.6438   2
  -1 -18  -1 105.348 11.1336   2
  -1  18  -1 111.954 11.7191   1
   1  18   1 118.206 10.3415   1
   2 -18   1 119.378 12.3401   2
  -2 -18  -1 121.901 11.8996   2
  -2  18  -1 120.372 12.6830   1
   2  18   1 111.757 11.6373   2
   2  18   1 125.208 10.2007   1
   3 -18   1 9.77570 4.52702   2
  -3  18  -1 8.31031 4.02758   1
   3  18   1 0.99275 3.15289   2
   4 -18   1 18.0355 5.60256   2
   4  18   1 18.0736 6.46315   2
   4  18   1 9.32336 3.80917   1
  -4  18  -1 8.60083 5.47944   1
   5 -18   1 5.75267 4.74805   2
  -5  18  -1 10.0280 5.64601   1
   5  18   1 8.99985 3.28877   2
   5  18   1 6.96589 2.11824   1
   5  18   1 8.44849 2.18643   1
   6 -18   1 125.532 13.9828   2
   6  18   1 112.575 12.8666   2
  -6  18  -1 112.542 14.8499   1
   7 -18   1 228.225 19.0518   2
  -7  18  -1 213.606 20.9127   1
   7  18   1 259.559 19.3688   2
   8 -18   1 125.663 14.3635   2
  -8  18  -1 122.333 17.3059   1
   8  18   1 99.3663 12.7730   2
   9 -18   1 93.1708 14.3918   2
  -9  18  -1 93.8562 15.8884   1
   9  18   1 100.236 13.9559   2
  10 -18   1 405.118 28.4827   2
 -10  18  -1 434.786 33.3000   1
  10  18   1 438.014 29.1745   2
  11 -18   1 18.7566 8.97487   2
 -11  18  -1 21.9499 11.1220   1
  11  18   1 35.1222 9.52513   2
  12 -18   1 22.4916 9.85562   2
 -12  18  -1 22.3107 10.7950   1
  12  18   1 21.6105 8.59906   2
  13 -18   1 46.5891 13.7342   2
  13  18   1 57.9549 14.2119   2
 -13  18  -1 74.9340 17.9303   1
  14 -18   1 -6.4117 8.09966   2
  14  18   1 15.3397 9.14436   2
 -14  18  -1 -4.7624 9.59953   1
  14 -19  -1 2.72557 10.0396   2
 -14  19   1 -13.587 10.2024   1
  14  19  -1 4.27941 9.09660   2
  13 -19  -1 5.55881 7.90748   2
  13  19  -1 0.06349 7.71967   2
 -13  19   1 2.08836 9.49290   1
  12 -19  -1 180.373 25.4959   2
  12  19  -1 139.806 25.2107   2
 -12  19   1 165.298 33.8475   1
  11 -19  -1 -5.0232 6.08982   2
  11  19  -1 -0.7482 6.09216   2
 -11  19   1 4.37689 9.78556   1
  10 -19  -1 -0.6050 5.80021   2
 -10  19   1 1.29061 6.52816   1
  10  19  -1 1.79258 5.09945   2
   9 -19  -1 -0.0813 5.19483   2
   9  19  -1 -4.3534 4.57554   2
  -9  19   1 9.90994 7.07642   1
   8 -19  -1 353.018 24.6699   2
   8  19  -1 344.848 24.6561   2
  -8  19   1 383.469 29.1002   1
   7 -19  -1 83.3687 12.1914   2
  -7  19   1 95.9830 14.0025   1
   7  19  -1 77.2277 11.2154   2
   6 -19  -1 35.1818 8.89740   2
  -6  19   1 35.1383 9.92167   1
   6  19  -1 43.8890 10.3134   2
   5 -19  -1 233.338 18.1086   2
   5  19  -1 206.904 10.0314   1
  -5  19   1 210.050 24.4737   1
   5  19  -1 198.390 9.84464   1
   5  19  -1 215.113 17.4709   2
   4 -19  -1 106.354 11.8229   2
   4  19  -1 84.8706 8.11580   1
  -4  19   1 91.9473 12.5448   1
   4  19  -1 119.550 12.7522   2
   3 -19  -1 46.3067 8.93601   2
   3  19  -1 47.6648 8.17929   2
  -3  19   1 44.0257 9.15703   1
   2 -19  -1 172.793 15.1705   2
  -2 -19   1 178.978 15.0015   2
   2  19  -1 164.045 12.3763   1
  -2  19   1 173.331 15.3357   1
  -1 -19   1 486.587 27.1223   2
   1 -19  -1 438.141 25.7190   2
   1  19  -1 455.426 24.1426   1
   0 -19  -1 2.40559 3.72365   2
   0 -19   1 2.10432 4.00245   2
  -1 -19  -1 47.8445 7.98856   2
   1 -19   1 51.9946 8.82640   2
   1  19   1 38.2072 7.15907   1
   2 -19   1 -0.4352 3.46512   2
  -2  19  -1 1.05980 3.85323   1
   2  19   1 0.03729 2.80754   2
   2  19   1 2.70885 2.82251   1
   3 -19   1 20.4359 6.74680   2
   3  19   1 16.0674 5.59613   2
  -3  19  -1 24.1381 7.70187   1
   4 -19   1 91.6193 12.6366   2
   4  19   1 95.6341 8.07659   1
   4  19   1 105.123 8.63223   1
  -4  19  -1 108.150 12.9639   1
   4  19   1 105.943 11.8017   2
   5 -19   1 13.1792 6.95280   2
   5  19   1 12.9276 2.80988   1
   5  19   1 9.29994 4.54819   2
  -5  19  -1 9.79879 8.16006   1
   5  19   1 12.8957 2.53090   1
   6 -19   1 54.5849 10.1796   2
   6  19   1 50.8857 9.58020   2
  -6  19  -1 57.5216 12.1996   1
   7 -19   1 14.0405 6.85040   2
   7  19   1 2.24461 4.42468   2
  -7  19  -1 9.77227 6.41483   1
   8 -19   1 3.09588 6.36503   2
   8  19   1 16.8541 6.92100   2
  -8  19  -1 -0.7190 6.85130   1
   9 -19   1 -3.1328 3.96548   2
  -9  19  -1 4.28002 6.95240   1
   9  19   1 8.19475 5.21171   2
  10 -19   1 15.2126 8.69544   2
 -10  19  -1 2.38576 8.89090   1
  10  19   1 13.7594 6.64276   2
  11 -19   1 75.0383 15.1860   2
 -11  19  -1 86.1226 19.5324   1
  11  19   1 96.2622 15.2069   2
  12 -19   1 13.3898 7.89669   2
  12  19   1 -10.750 5.62863   2
 -12  19  -1 7.03649 10.8718   1
  13 -19   1 9.64472 9.02731   2
  13  19   1 2.77863 8.42028   2
 -13  19  -1 3.57493 12.0537   1
  14 -19   1 53.5459 13.6089   2
 -14  19  -1 68.3891 18.4308   1
  14  19   1 48.8672 13.2469   2
  14 -20  -1 17.5159 11.6160   2
 -14  20   1 10.7943 12.4569   1
  14  20  -1 7.80269 9.28256   2
  13 -20  -1 -4.4111 7.03535   2
 -13  20   1 -6.1857 10.0407   1
  13  20  -1 4.08283 7.01303   2
  12 -20  -1 6.78165 8.25547   2
 -12  20   1 -1.6877 9.09701   1
  12  20  -1 2.87226 6.53227   2
  11 -20  -1 163.476 18.8208   2
  11  20  -1 196.516 20.6111   2
 -11  20   1 176.484 23.8471   1
  10 -20  -1 136.807 16.5577   2
 -10  20   1 124.209 20.5084   1
  10  20  -1 131.352 16.3920   2
   9 -20  -1 10.9045 6.81448   2
   9  20  -1 14.4801 8.11253   2
  -9  20   1 20.0522 9.32680   1
   8 -20  -1 -3.4603 6.22720   2
  -8  20   1 12.0817 8.25838   1
   8  20  -1 3.55103 4.74924   2
   7 -20  -1 469.301 29.5439   2
   7  20  -1 500.917 30.5014   2
  -7  20   1 523.235 34.0845   1
   6 -20  -1 114.678 13.6247   2
   6  20  -1 67.9894 10.8413   2
  -6  20   1 119.646 15.8505   1
   5 -20  -1 435.490 27.5615   2
  -5  20   1 528.068 32.1643   1
   5  20  -1 503.774 29.1861   2
   4 -20  -1 232.916 18.6552   2
  -4  20   1 212.905 19.2061   1
   4  20  -1 247.607 13.5795   1
   4  20  -1 287.723 20.2954   2
   3 -20  -1 96.1966 13.7865   2
  -3  20   1 104.558 12.1537   1
   3  20  -1 98.2219 15.2275   2
   2 -20  -1 145.523 14.1907   2
  -2 -20   1 139.512 13.9676   2
  -2  20   1 183.259 15.7322   1
   2  20  -1 157.196 12.2656   1
  -1 -20   1 823.873 40.2600   2
   1 -20  -1 805.781 39.5073   2
   1  20  -1 841.290 37.5307   1
   0 -20  -1 170.346 15.1860   2
   0 -20   1 173.120 15.8156   2
   0  20  -1 186.562 17.5548   1
   0  20   1 198.979 15.1461   1
  -1 -20  -1 889.685 42.1398   2
   1 -20   1 884.390 42.7433   2
   1  20   1 905.032 39.2974   1
   2 -20   1 15.0843 6.05782   2
  -2  20  -1 24.1414 7.10633   1
   2  20   1 23.2628 5.35219   1
   2  20   1 19.1234 6.60521   2
   3 -20   1 1.53116 3.59372   2
  -3  20  -1 2.23990 3.94450   1
   3  20   1 0.89680 4.12270   2
   4 -20   1 26.8500 7.36505   2
   4  20   1 40.4290 5.63507   1
  -4  20  -1 22.5434 7.68056   1
   4  20   1 32.1819 7.46833   2
   5 -20   1 5.08554 3.94414   2
   5  20   1 1.48717 2.42483   1
  -5  20  -1 -1.3359 5.43364   1
   5  20   1 10.1080 6.14155   2
   6 -20   1 215.557 19.2623   2
  -6  20  -1 247.966 21.9859   1
   6  20   1 253.396 19.8252   2
   7 -20   1 169.625 16.9996   2
   7  20   1 152.844 15.7013   2
  -7  20  -1 123.005 17.2220   1
   8 -20   1 12.5905 6.36355   2
  -8  20  -1 2.02120 7.54023   1
   8  20   1 6.23091 7.15576   2
   9 -20   1 230.848 20.8206   2
   9  20   1 216.297 20.1431   2
  -9  20  -1 208.796 24.0982   1
  10 -20   1 2.70830 6.13276   2
 -10  20  -1 -4.6228 8.41280   1
  10  20   1 -0.6390 6.83924   2
  11 -20   1 253.209 23.9071   2
  11  20   1 209.840 21.5259   2
 -11  20  -1 283.646 27.3284   1
  12 -20   1 6.02865 8.44785   2
 -12  20  -1 -14.871 8.55475   1
  12  20   1 -8.6763 6.42551   2
  13 -20   1 20.3793 9.10379   2
  13  20   1 29.2065 11.8230   2
 -13  20  -1 31.4396 13.3921   1
  13 -21  -1 12.4646 9.40945   2
 -13  21   1 -4.1459 10.3571   1
  13  21  -1 22.4092 9.58733   2
  12 -21  -1 29.7226 10.9089   2
  12  21  -1 15.6240 8.01670   2
 -12  21   1 35.9138 13.8573   1
  11 -21  -1 73.2626 20.2551   2
  11  21  -1 73.9443 20.1235   2
  10 -21  -1 -4.4011 5.71322   2
  10  21  -1 7.07190 7.11143   2
 -10  21   1 7.48835 8.50311   1
   9 -21  -1 21.4456 8.67646   2
  -9  21   1 25.8586 10.6608   1
   9  21  -1 38.0778 9.49016   2
   8 -21  -1 310.678 23.7323   2
   8  21  -1 353.193 25.8723   2
  -8  21   1 350.634 29.0553   1
   7 -21  -1 138.216 15.4524   2
  -7  21   1 166.645 18.6561   1
   7  21  -1 135.900 15.3377   2
   6 -21  -1 95.0807 13.0215   2
   6  21  -1 69.3910 11.7330   2
  -6  21   1 92.2181 14.4935   1
   5 -21  -1 4.27768 4.79092   2
   5  21  -1 8.13415 3.74811   1
   5  21  -1 13.7902 6.04526   2
  -5  21   1 2.34740 5.87816   1
   4 -21  -1 34.2280 8.67659   2
   4  21  -1 24.9037 4.75404   1
   4  21  -1 46.6611 10.4892   2
  -4  21   1 28.8656 7.68971   1
   3 -21  -1 580.604 32.3734   2
  -3  21   1 560.402 33.0596   1
   3  21  -1 616.712 33.0732   2
   2 -21  -1 3.76812 4.99892   2
  -2 -21   1 4.52591 4.37205   2
   2  21  -1 6.38579 5.21148   2
   2  21  -1 7.28116 4.09617   1
  -2  21   1 -1.5846 3.72559   1
  -1 -21   1 1000.20 47.0530   2
   1 -21  -1 989.999 46.9714   2
   1  21  -1 1020.56 44.0259   1
  -1  21   1 976.943 45.3486   1
   0 -21  -1 93.3260 12.5756   2
   0 -21   1 83.3022 11.8204   2
   0  21  -1 104.510 11.4966   1
   0  21   1 87.3181 11.1068   1
  -1 -21  -1 7.23332 4.49917   2
   1 -21   1 6.75025 4.71155   2
   1  21   1 4.85705 4.32072   1
  -1  21  -1 9.64814 5.19872   1
   2 -21   1 90.1998 12.0248   2
   2  21   1 80.2227 9.06872   1
  -2  21  -1 67.5163 11.2720   1
   2  21   1 84.7154 11.3389   2
   3 -21   1 178.855 16.9810   2
   3  21   1 191.980 16.6145   2
  -3  21  -1 178.967 17.7256   1
   4 -21   1 26.3156 8.90955   2
   4  21   1 17.4578 5.86555   2
   4  21   1 15.6355 4.27105   1
  -4  21  -1 22.7195 7.87261   1
   5 -21   1 30.8900 9.62190   2
   5  21   1 25.5591 5.11966   1
  -5  21  -1 18.9312 8.34833   1
   5  21   1 24.6299 7.63901   2
   6 -21   1 187.131 17.8410   2
  -6  21  -1 194.745 20.4764   1
   6  21   1 199.524 18.4883   2
   7 -21   1 31.1017 10.5259   2
   7  21   1 43.1102 9.90349   2
  -7  21  -1 44.1287 13.4083   1
   8 -21   1 8.20594 8.32034   2
   8  21   1 24.1637 9.39489   2
  -8  21  -1 16.0603 9.76552   1
   9 -21   1 -3.7492 7.07337   2
   9  21   1 0.76148 6.38741   2
  -9  21  -1 -2.3037 6.55951   1
  10 -21   1 28.4749 9.97796   2
  10  21   1 55.8155 12.5847   2
 -10  21  -1 35.6602 13.9936   1
  11 -21   1 19.7638 10.1204   2
  11  21   1 27.4202 8.12570   2
 -11  21  -1 58.0670 16.5252   1
  12 -21   1 -0.5755 8.63064   2
  12  21   1 17.1639 10.1257   2
 -12  21  -1 12.6586 11.1165   1
  13 -21   1 13.8171 8.88166   2
 -13  21  -1 -1.1532 11.8659   1
  13  21   1 9.12434 9.48932   2
  13 -22  -1 33.6643 11.6493   2
  13  22  -1 41.5073 14.5954   2
 -13  22   1 35.4061 16.0175   1
  12 -22  -1 -1.1717 7.45984   2
  12  22  -1 11.6070 8.36423   2
 -12  22   1 25.9067 15.1289   1
  11 -22  -1 10.0232 8.72264   2
 -11  22   1 16.0669 11.6787   1
  11  22  -1 15.2969 8.43420   2
  10 -22  -1 -7.3716 5.60914   2
  10  22  -1 13.2906 7.71665   2
 -10  22   1 -3.8382 9.56144   1
   9 -22  -1 43.5270 9.64302   2
  -9  22   1 51.9675 14.2338   1
   9  22  -1 50.3275 11.3045   2
   8 -22  -1 33.0376 9.85283   2
  -8  22   1 21.9140 9.94718   1
   8  22  -1 51.0624 12.2846   2
   7 -22  -1 99.8424 13.6612   2
  -7  22   1 85.0860 15.4570   1
   7  22  -1 108.866 14.6593   2
   6 -22  -1 56.8372 10.6809   2
  -6  22   1 58.8740 12.7511   1
   6  22  -1 53.7883 10.1400   2
   5 -22  -1 87.5542 12.5602   2
   5  22  -1 115.680 13.6673   2
  -5  22   1 99.0450 14.9052   1
   4 -22  -1 153.894 16.0965   2
   4  22  -1 155.172 15.9706   2
  -4  22   1 191.441 18.3866   1
   3 -22  -1 264.057 20.5383   2
   3  22  -1 254.035 16.1707   1
   3  22  -1 253.013 19.7731   2
  -3  22   1 264.453 31.4202   1
   2 -22  -1 318.211 22.4431   2
  -2 -22   1 328.027 23.2039   2
   2  22  -1 300.890 21.9671   2
   2  22  -1 287.888 18.3859   1
  -2  22   1 273.046 21.1007   1
   1 -22  -1 2.44669 3.95763   2
  -1 -22   1 -1.0526 3.54288   2
  -1  22   1 2.04160 4.93810   1
   1  22  -1 7.00092 4.32958   1
   0 -22  -1 33.3111 8.43301   2
   0 -22   1 27.4833 7.33120   2
   0  22  -1 46.9338 9.67259   1
   1 -22   1 85.6256 12.1152   2
  -1 -22  -1 71.6929 11.1669   2
   1  22   1 102.032 11.5070   1
  -1  22  -1 117.199 13.2603   1
   2 -22   1 312.348 22.4516   2
  -2  22  -1 250.484 21.0828   1
   2  22   1 270.515 21.0516   2
   2  22   1 284.494 17.8279   1
   3 -22   1 11.1371 6.13456   2
  -3  22  -1 7.34157 5.39958   1
   3  22   1 17.6895 5.16633   1
   3  22   1 9.41959 5.23360   2
   4 -22   1 95.9826 13.2578   2
   4  22   1 86.1751 8.62654   1
   4  22   1 92.8082 12.4984   2
  -4  22  -1 113.918 15.0548   1
   5 -22   1 65.8252 11.2590   2
   5  22   1 76.6454 12.1957   2
  -5  22  -1 38.6774 9.79868   1
   6 -22   1 -2.8321 4.76167   2
  -6  22  -1 -4.5504 5.72035   1
   6  22   1 -2.5637 4.31188   2
   7 -22   1 98.5836 14.3191   2
   7  22   1 73.6627 12.8712   2
  -7  22  -1 99.0190 16.3437   1
   8 -22   1 6.23204 6.12512   2
   8  22   1 5.12891 6.32434   2
  -8  22  -1 18.5531 10.7096   1
   9 -22   1 58.1918 12.1998   2
   9  22   1 96.6830 14.8088   2
  -9  22  -1 59.9346 16.0825   1
  10 -22   1 115.458 19.6648   2
 -10  22  -1 122.567 23.3410   1
  10  22   1 113.658 17.6251   2
  11 -22   1 12.3721 9.41950   2
  11  22   1 -3.8477 6.17544   2
 -11  22  -1 6.20701 11.6432   1
  12 -22   1 39.4423 12.0847   2
  12  22   1 35.0742 11.1364   2
 -12  22  -1 38.2350 16.2866   1
 -13  22  -1 139.220 25.9753   1
  13  22   1 184.795 22.0822   2
  12 -23  -1 10.4216 10.0027   2
  12  23  -1 14.9277 9.33602   2
 -12  23   1 10.6844 11.0628   1
  11 -23  -1 -12.364 7.62587   2
  11  23  -1 -2.2420 7.22336   2
 -11  23   1 -0.1118 10.2704   1
  10 -23  -1 41.1946 12.5907   2
  10  23  -1 91.7985 15.3787   2
 -10  23   1 61.8877 16.4754   1
   9 -23  -1 38.9732 11.2293   2
  -9  23   1 67.7024 16.7683   1
   9  23  -1 40.0749 10.8806   2
   8 -23  -1 162.220 17.6804   2
   8  23  -1 161.223 18.0155   2
  -8  23   1 173.261 21.4349   1
   7 -23  -1 9.45414 7.05391   2
   7  23  -1 -1.0636 5.02829   2
  -7  23   1 0.03600 7.06009   1
   6 -23  -1 0.11629 4.03452   2
  -6  23   1 15.8399 9.17826   1
   6  23  -1 -3.6513 4.05884   2
   5 -23  -1 160.476 17.3620   2
  -5  23   1 183.570 19.9720   1
   5  23  -1 175.667 17.0860   2
   5  23  -1 179.887 13.0080   1
   4 -23  -1 70.5619 11.8410   2
   4  23  -1 51.6702 10.4620   2
  -4  23   1 66.9749 14.4913   1
   3 -23  -1 -1.9049 4.08656   2
   3  23  -1 -3.1337 4.38405   2
  -3  23   1 7.19686 5.63913   1
   3  23  -1 4.41470 4.31608   1
   2 -23  -1 4.13669 5.31239   2
  -2  23   1 5.30976 5.27951   1
   2  23  -1 0.84411 4.08517   1
   2  23  -1 -5.0185 3.38421   2
  -1 -23   1 9.30789 6.77195   2
   1 -23  -1 4.02768 3.97010   2
   1  23  -1 4.52787 5.10739   1
  -1  23   1 15.9629 7.38999   1
   0 -23   1 40.4619 10.1907   2
   0 -23  -1 48.4051 9.48077   2
   0  23   1 20.8479 6.90998   1
   0  23  -1 32.0349 8.75072   1
   1 -23   1 369.723 25.8250   2
  -1 -23  -1 407.850 25.9678   2
   1  23   1 371.937 22.9631   1
  -1  23  -1 362.166 24.9065   1
   2 -23   1 29.8868 8.54670   2
   2  23   1 48.0329 9.27827   2
   2  23   1 32.3442 6.85768   1
   3 -23   1 161.356 17.0466   2
   3  23   1 161.176 16.1655   2
  -3  23  -1 175.949 18.3545   1
   3  23   1 165.526 12.7472   1
   4 -23   1 81.6937 13.1768   2
   4  23   1 86.1114 13.2939   2
  -4  23  -1 75.8250 14.7809   1
   5 -23   1 230.367 21.0926   2
   5  23   1 206.015 19.2224   2
  -5  23  -1 256.325 23.2707   1
   5  23   1 208.918 10.9214   1
   6 -23   1 45.6986 9.40346   2
   6  23   1 54.8012 12.6775   2
  -6  23  -1 35.7479 10.3036   1
   7 -23   1 65.6282 13.2460   2
  -7  23  -1 44.9892 11.8020   1
   7  23   1 66.2724 11.6506   2
   8 -23   1 78.5363 14.6355   2
  -8  23  -1 54.2193 15.0205   1
   8  23   1 53.8877 12.1428   2
   9 -23   1 -4.6318 5.95099   2
  -9  23  -1 21.4646 8.60947   1
   9  23   1 -2.9419 5.84407   2
  10 -23   1 58.3610 14.6245   2
  10  23   1 31.5842 10.1039   2
 -10  23  -1 49.8006 15.7218   1
  11 -23   1 -7.7642 7.25628   2
  11  23   1 -0.7812 7.72947   2
 -11  23  -1 4.19273 10.6583   1
  12 -23   1 6.85300 10.4595   2
 -12  23  -1 -6.5222 11.2538   1
  12  23   1 1.22953 8.60879   2
  12 -24  -1 14.9118 9.98668   2
 -12  24   1 -13.611 10.1160   1
  12  24  -1 8.04164 8.73677   2
  11 -24  -1 8.29899 8.46689   2
 -11  24   1 27.8011 12.5914   1
  11  24  -1 11.4760 9.28045   2
  10 -24  -1 29.7336 11.1979   2
  10  24  -1 63.2551 15.0702   2
 -10  24   1 45.9981 14.5022   1
   9 -24  -1 110.213 18.0153   2
  -9  24   1 91.3814 35.1064   1
   8 -24  -1 63.3628 13.2739   2
   8  24  -1 51.3345 13.3014   2
  -8  24   1 93.4026 18.1735   1
   7 -24  -1 4.63270 6.00781   2
  -7  24   1 8.66982 9.03823   1
   7  24  -1 2.88855 5.17428   2
   6 -24  -1 31.9121 10.4824   2
   6  24  -1 16.1785 7.27639   2
  -6  24   1 10.3504 7.65924   1
   5 -24  -1 141.156 15.9893   2
   5  24  -1 134.899 15.6925   2
  -5  24   1 143.061 19.1034   1
   4 -24  -1 -1.6982 5.66598   2
   4  24  -1 4.25271 4.48623   2
  -4  24   1 6.04742 6.33769   1
   4  24  -1 8.63602 5.79795   1
   3 -24  -1 438.682 29.0287   2
   3  24  -1 491.408 25.1128   1
  -3  24   1 443.100 30.4579   1
   3  24  -1 444.347 29.6406   2
   2 -24  -1 23.2468 7.40569   2
  -2  24   1 17.4075 8.47023   1
   2  24  -1 22.9521 7.76340   2
   2  24  -1 25.4179 6.92342   1
  -1 -24   1 6.60906 5.68141   2
   1 -24  -1 6.47038 4.44187   2
  -1  24   1 2.83787 5.17605   1
   1  24  -1 4.06056 4.73876   1
   0 -24   1 106.049 14.3389   2
   0 -24  -1 86.9834 13.2354   2
   0  24  -1 93.5292 13.1076   1
   0  24   1 108.767 12.9768   1
  -1 -24  -1 67.2342 11.4310   2
   1 -24   1 111.902 14.4624   2
  -1  24  -1 82.5184 13.1185   1
   1  24   1 95.2599 12.1786   1
   2 -24   1 -1.5452 4.63039   2
   2  24   1 8.74526 5.53315   1
  -2  24  -1 4.39220 5.41882   1
   2  24   1 0.90159 4.82123   2
   3 -24   1 144.693 16.7950   2
   3  24   1 134.926 15.7377   2
   3  24   1 116.906 12.6343   1
  -3  24  -1 176.945 20.4415   1
   4 -24   1 421.959 28.8227   2
   4  24   1 400.694 27.8108   2
  -4  24  -1 409.694 30.1294   1
   5 -24   1 14.2252 7.98586   2
  -5  24  -1 21.9397 9.30850   1
   5  24   1 13.8969 7.02735   2
   6 -24   1 6.45158 6.42590   2
  -6  24  -1 4.78842 6.94536   1
   6  24   1 4.06885 4.82041   2
   7 -24   1 108.552 16.2648   2
  -7  24  -1 130.095 20.9647   1
   7  24   1 132.383 16.2816   2
   8 -24   1 28.5830 9.68241   2
  -8  24  -1 59.0243 14.5981   1
   8  24   1 61.0924 13.4704   2
   9 -24   1 142.016 21.9153   2
   9  24   1 131.317 21.2128   2
  -9  24  -1 163.050 37.2245   1
  10 -24   1 112.753 18.5757   2
  10  24   1 86.5949 16.7385   2
 -10  24  -1 88.2989 20.5657   1
  11 -24   1 -7.3638 7.75983   2
  11  24   1 3.03189 7.88648   2
 -11  24  -1 5.15371 11.5522   1
 -12  24  -1 40.6137 18.1787   1
  12  24   1 15.1982 10.9900   2
  11 -25  -1 101.584 19.5048   2
 -11  25   1 37.9024 16.8613   1
  11  25  -1 79.1676 17.0242   2
  10 -25  -1 53.8211 12.6438   2
 -10  25   1 26.6754 12.8276   1
  10  25  -1 52.5783 13.0072   2
   9 -25  -1 3.14394 7.75748   2
   9  25  -1 14.1321 7.57785   2
  -9  25   1 0.99573 9.76272   1
   8 -25  -1 52.4647 14.4090   2
   8  25  -1 47.4154 14.4023   2
  -8  25   1 52.8282 15.2698   1
   7 -25  -1 19.3218 7.57885   2
   7  25  -1 6.09572 6.68314   2
  -7  25   1 2.69864 8.89182   1
   6 -25  -1 307.184 24.6882   2
  -6  25   1 304.505 27.7884   1
   6  25  -1 296.111 24.6404   2
   5 -25  -1 -3.3149 5.97515   2
   5  25  -1 9.28399 6.69954   2
  -5  25   1 13.4987 7.75624   1
   4 -25  -1 0.09542 5.47106   2
  -4  25   1 -3.9697 6.55085   1
   4  25  -1 6.86860 5.57538   2
   3 -25  -1 221.454 20.3489   2
   3  25  -1 234.939 21.1725   2
   2 -25  -1 37.9819 10.2146   2
   2  25  -1 74.1908 10.9909   1
   2  25  -1 31.7672 9.89062   2
  -2  25   1 54.6068 11.1920   1
   1 -25  -1 397.717 26.9858   2
  -1 -25   1 358.251 26.0858   2
  -1  25   1 332.054 24.3501   1
   1  25  -1 355.290 24.0764   1
   0 -25  -1 34.7043 8.59447   2
   0 -25   1 59.7306 12.8123   2
   0  25  -1 39.4387 10.0321   1
   0  25   1 45.3419 10.2009   1
   1 -25   1 40.5869 9.34514   2
  -1 -25  -1 39.3603 9.95230   2
   1  25   1 43.5370 9.68088   1
  -1  25  -1 32.1358 9.51152   1
   2 -25   1 13.6756 6.85833   2
  -2  25  -1 16.2072 8.62632   1
   2  25   1 7.72999 5.63853   2
   2  25   1 31.3772 7.83642   1
   3 -25   1 0.51973 5.23600   2
   3  25   1 4.72217 5.92891   2
   4 -25   1 100.610 14.0122   2
   4  25   1 85.2028 13.3332   2
  -4  25  -1 47.2580 11.6846   1
   5 -25   1 10.7066 7.80231   2
  -5  25  -1 16.4017 8.25669   1
   5  25   1 -2.1599 4.53913   2
   5  25   1 8.90556 4.75990   1
   6 -25   1 -2.7865 6.19855   2
   6  25   1 7.33828 6.16138   2
  -6  25  -1 4.24540 7.86769   1
   7 -25   1 4.53102 6.57803   2
  -7  25  -1 17.0027 10.0382   1
   7  25   1 -3.3105 5.04567   2
  -8  25  -1 -3.0909 9.38195   1
   9 -25   1 191.157 22.3507   2
   9  25   1 184.609 20.8015   2
  -9  25  -1 184.443 25.7610   1
  10 -25   1 1.12712 8.42030   2
  10  25   1 -4.7780 7.08107   2
 -10  25  -1 3.21636 10.9508   1
  11 -25   1 69.9107 25.0008   2
  11  25   1 62.1962 15.5767   2
 -11  25  -1 64.0938 19.5155   1
  11 -26  -1 28.8882 12.9432   2
  11  26  -1 29.9638 13.1690   2
 -11  26   1 30.9418 15.2427   1
  10 -26  -1 103.430 19.5566   2
 -10  26   1 120.563 25.4691   1
  10  26  -1 124.044 20.1988   2
   9 -26  -1 11.8281 10.4573   2
   9  26  -1 34.3441 12.2193   2
  -9  26   1 39.9982 13.7275   1
   8 -26  -1 30.6054 11.2306   2
  -8  26   1 27.9646 13.1570   1
   8  26  -1 28.9389 11.4243   2
   7 -26  -1 196.275 21.0418   2
  -7  26   1 206.770 25.0900   1
   7  26  -1 188.826 21.5586   2
   6 -26  -1 1.57163 5.68392   2
  -6  26   1 3.83907 8.05256   1
   6  26  -1 3.18265 5.72037   2
   5 -26  -1 292.783 24.0034   2
  -5  26   1 304.875 27.3262   1
   5  26  -1 266.889 23.6490   2
   4 -26  -1 11.7780 6.60532   2
  -4  26   1 -6.5186 6.99706   1
   4  26  -1 -2.2968 6.02610   2
   3 -26  -1 22.9494 7.83029   2
  -3  26   1 29.6256 9.34567   1
   3  26  -1 27.3920 8.83879   2
   3  26  -1 49.7910 10.5722   1
   2 -26  -1 5.72560 6.89778   2
  -2  26   1 16.8885 8.77564   1
   2  26  -1 8.85357 6.33791   2
   2  26  -1 10.3139 6.74474   1
  -1 -26   1 0.89575 5.64718   2
   1 -26  -1 2.73506 6.25541   2
  -1  26   1 -0.4409 6.05051   1
   1  26  -1 5.28316 6.60863   1
   0 -26   1 189.915 19.4586   2
   0 -26  -1 198.159 19.3455   2
   0  26  -1 183.985 19.0138   1
   1 -26   1 2.24918 4.73286   2
  -1 -26  -1 9.95345 6.80528   2
  -1  26  -1 3.76536 7.03180   1
   1  26   1 3.37867 4.89812   2
   1  26   1 2.34434 5.77477   1
   2 -26   1 31.9153 8.39107   2
   2  26   1 29.0602 8.35738   1
  -2  26  -1 17.7921 9.10840   1
   2  26   1 37.0664 9.12590   2
   3 -26   1 8.76933 7.43732   2
  -3  26  -1 22.3882 8.33772   1
   3  26   1 2.67526 6.05212   1
   3  26   1 7.33178 6.09112   2
   4 -26   1 3.24843 6.22695   2
  -4  26  -1 -7.7970 6.35370   1
   4  26   1 0.20189 6.77327   2
   5 -26   1 95.6349 15.3554   2
   5  26   1 135.831 15.9039   2
  -5  26  -1 89.1475 18.4704   1
   6 -26   1 -1.2471 6.26477   2
  -6  26  -1 -15.821 7.48731   1
   6  26   1 -8.2636 5.66455   2
   7 -26   1 22.7707 13.4187   2
  -7  26  -1 32.6300 10.9835   1
   7  26   1 29.3815 14.2110   2
   8 -26   1 5.03545 8.26116   2
   8  26   1 3.11900 6.01769   2
  -8  26  -1 11.1205 10.1143   1
   9 -26   1 36.7403 11.6123   2
   9  26   1 34.7423 12.5253   2
  -9  26  -1 35.6069 13.3303   1
  10 -26   1 63.4610 16.9745   2
  10  26   1 75.0524 16.0182   2
 -10  26  -1 81.2631 20.9341   1
  10 -27  -1 238.746 25.6786   2
  10  27  -1 195.010 24.5280   2
   9 -27  -1 14.4871 10.5347   2
   9  27  -1 35.8922 11.6843   2
  -9  27   1 45.3420 14.6444   1
   8 -27  -1 100.130 18.4793   2
  -8  27   1 84.5210 21.4478   1
   8  27  -1 72.0655 16.3105   2
   7 -27  -1 20.6813 11.3983   2
   7  27  -1 36.3309 12.0159   2
  -7  27   1 0.98193 15.2741   1
   6 -27  -1 16.4827 10.5553   2
  -6  27   1 19.0204 10.7458   1
   6  27  -1 -0.6385 8.73081   2
   5 -27  -1 76.1974 14.7462   2
   5  27  -1 62.9558 13.1359   2
  -5  27   1 67.7111 15.3015   1
   4 -27  -1 -3.8955 5.97985   2
  -4  27   1 -11.616 6.70463   1
   4  27  -1 6.54834 6.33868   2
   3 -27  -1 5.57810 7.13908   2
  -3  27   1 35.8458 10.9994   1
   3  27  -1 15.1672 6.60575   1
   3  27  -1 19.3813 7.77995   2
   2 -27  -1 91.1980 12.8572   2
   2  27  -1 48.9852 12.1061   2
   2  27  -1 57.6020 12.2433   1
  -2  27   1 87.9240 15.1782   1
  -1 -27   1 9.91986 8.72401   2
   1 -27  -1 4.11581 6.08990   2
   1  27  -1 8.70220 7.47839   1
  -1  27   1 24.5896 9.47533   1
   1  27  -1 4.82248 6.95681   2
   0 -27   1 1.05214 6.21304   2
   0 -27  -1 11.3323 7.91517   2
   0  27  -1 -9.7087 6.30675   1
   0  27   1 5.89736 6.84816   1
   1 -27   1 -14.302 4.33761   2
   1  27   1 4.98179 6.52390   1
   1  27   1 0.24973 6.07554   2
  -1  27  -1 -6.3431 5.63869   1
   2 -27   1 178.596 20.0138   2
   2  27   1 185.163 19.5463   2
  -2  27  -1 205.325 21.7402   1
   2  27   1 206.526 17.6170   1
   3 -27   1 -3.5809 5.09070   2
   3  27   1 -8.4790 6.09114   1
   3  27   1 -2.9827 5.14561   2
  -3  27  -1 9.60177 9.17791   1
   4 -27   1 -0.8766 5.93758   2
   4  27   1 -3.9646 4.94197   2
  -4  27  -1 -4.6914 6.52521   1
   5 -27   1 16.3560 8.46892   2
  -5  27  -1 -1.2414 9.53540   1
   5  27   1 22.5363 9.74579   2
   6 -27   1 36.0412 15.3301   2
   6  27   1 -0.0822 7.66314   2
  -6  27  -1 7.39294 10.7602   1
   7 -27   1 5.64707 7.95061   2
  -7  27  -1 -5.5293 8.90108   1
   7  27   1 4.82840 6.54935   2
   8 -27   1 141.068 20.2042   2
  -8  27  -1 162.024 26.3254   1
   8  27   1 129.171 19.3023   2
   9 -27   1 19.2554 9.79965   2
  -9  27  -1 -8.0120 11.3801   1
   9  27   1 0.29821 8.61838   2
  10  27   1 -2.2881 8.74400   2
   9 -28  -1 33.7841 11.8119   2
  -9  28   1 44.2667 15.2816   1
   9  28  -1 45.7669 13.2965   2
   8 -28  -1 113.742 19.8090   2
  -8  28   1 117.371 23.2515   1
   8  28  -1 118.268 18.6116   2
   7 -28  -1 -1.8875 7.52350   2
   7  28  -1 12.1029 8.04643   2
  -7  28   1 -8.4021 10.2820   1
   6 -28  -1 39.2032 11.3219   2
   6  28  -1 19.2742 9.54005   2
   5 -28  -1 -10.956 13.4792   2
  -5  28   1 10.4706 9.22707   1
   5  28  -1 20.4543 9.20643   2
   4 -28  -1 23.7647 10.2144   2
   4  28  -1 44.6077 12.4304   2
  -4  28   1 20.0677 10.3555   1
   3 -28  -1 236.481 22.4881   2
   3  28  -1 270.478 23.6503   2
   3  28  -1 257.175 20.5877   1
  -3  28   1 244.770 23.6770   1
   2 -28  -1 77.2159 14.2086   2
   2  28  -1 103.857 15.6331   2
  -2  28   1 97.4812 17.2440   1
   1 -28  -1 16.0435 8.29458   2
   1  28  -1 28.6550 10.0386   2
  -1  28   1 13.3318 8.29341   1
   1  28  -1 15.0315 7.92737   1
   0 -28  -1 67.9428 13.9909   2
   0 -28   1 72.1092 14.3802   2
   0  28   1 59.3761 11.7777   1
   0  28  -1 60.7171 13.8490   1
   1 -28   1 307.886 26.9084   2
   1  28   1 347.570 27.7333   2
   1  28   1 357.872 24.3015   1
  -1  28  -1 303.516 26.7817   1
   2 -28   1 242.358 23.2685   2
   2  28   1 217.544 21.8855   2
  -2  28  -1 192.613 22.7130   1
   3 -28   1 21.2440 8.94919   2
   3  28   1 25.6986 8.51945   2
   3  28   1 20.8492 7.92276   1
  -3  28  -1 39.6448 11.3571   1
   4 -28   1 2.94296 6.25402   2
  -4  28  -1 0.38190 8.70794   1
   4  28   1 15.8961 7.85914   2
   5 -28   1 11.8521 8.15564   2
  -5  28  -1 -2.9733 9.78480   1
   5  28   1 10.4487 7.32463   2
   6 -28   1 -3.3704 7.13537   2
   6  28   1 -10.911 6.21629   2
  -6  28  -1 7.46890 12.8132   1
   7 -28   1 44.8462 13.4706   2
   7  28   1 43.7839 13.3279   2
  -7  28  -1 29.7551 14.1180   1
   8 -28   1 29.7508 11.7181   2
   8  28   1 15.6408 10.4348   2
  -8  28  -1 30.2866 13.4464   1
   9  28   1 39.3684 11.8592   2
  -9  28  -1 46.6106 16.8220   1
   8 -29  -1 35.3029 13.6469   2
  -8  29   1 27.7369 15.1645   1
   8  29  -1 67.2931 14.9103   2
   7 -29  -1 0.33298 9.50554   2
  -7  29   1 3.40008 12.0008   1
   7  29  -1 3.79037 9.00170   2
   6 -29  -1 52.6912 15.5432   2
   6  29  -1 80.2523 16.9615   2
  -6  29   1 39.5292 13.5379   1
   5 -29  -1 5.39016 8.02627   2
   5  29  -1 17.7928 9.79302   2
  -5  29   1 5.63168 12.4882   1
   4 -29  -1 125.320 18.3238   2
   4  29  -1 84.3947 17.2141   2
  -4  29   1 74.3553 15.8704   1
   3 -29  -1 140.112 20.9482   2
   3  29  -1 133.107 18.3289   2
  -3  29   1 102.503 19.7792   1
   3  29  -1 159.946 17.0092   1
   2 -29  -1 13.1223 11.9047   2
  -2  29   1 21.3950 10.1394   1
   2  29  -1 12.6814 14.7342   2
   1 -29  -1 -0.8171 6.32089   2
   1  29  -1 5.20028 7.19780   2
   1  29  -1 0.87446 7.61615   1
  -1  29   1 -7.4060 6.94929   1
   0 -29  -1 19.7378 9.16742   2
   0 -29   1 27.3420 9.01527   2
   0  29   1 36.8725 10.6257   1
   0  29  -1 20.9415 8.76008   1
   1 -29   1 191.114 22.7362   2
   1  29   1 181.076 19.0715   1
  -1  29  -1 167.550 20.3184   1
   1  29   1 165.083 20.4361   2
  -2  29  -1 20.0586 10.2277   1
   2  29   1 3.95260 8.24552   2
   3 -29   1 6.44796 7.83287   2
   3  29   1 -0.2280 6.42672   1
  -3  29  -1 -12.530 8.23272   1
   3  29   1 4.79986 6.34347   2
   4 -29   1 -2.2265 7.11921   2
  -4  29  -1 6.95400 9.45419   1
   4  29   1 19.4518 8.70412   2
   5 -29   1 6.11360 8.27456   2
   5  29   1 -11.091 5.95278   2
   6 -29   1 12.0234 9.90790   2
  -6  29  -1 -8.9471 9.69865   1
   6  29   1 -7.3694 6.55867   2
   7 -29   1 12.4321 11.1077   2
  -7  29  -1 37.6478 16.7557   1
   7  29   1 5.57034 7.67837   2
   8  29   1 35.9175 11.8536   2
  -8  29  -1 65.5374 20.3356   1
   7 -30  -1 58.2198 16.6567   2
  -7  30   1 76.3894 18.1667   1
   7  30  -1 51.6344 12.1981   2
   6 -30  -1 59.0390 13.3550   2
   6  30  -1 66.8030 16.3052   2
  -6  30   1 64.3788 17.5483   1
   5 -30  -1 9.63193 8.50319   2
   5  30  -1 -2.0215 8.01960   2
  -5  30   1 10.5928 10.5994   1
   4 -30  -1 32.1286 11.6196   2
   4  30  -1 39.3399 11.3546   2
  -4  30   1 26.9501 14.5739   1
   3 -30  -1 -5.1111 7.33444   2
  -3  30   1 8.55527 8.60444   1
   3  30  -1 0.16404 5.92386   2
   2 -30  -1 125.778 18.3397   2
   2  30  -1 180.011 18.6171   1
   2  30  -1 135.251 19.6226   2
  -2  30   1 162.046 21.2209   1
   1 -30  -1 21.6325 8.98230   2
  -1  30   1 13.0257 9.66775   1
   1  30  -1 15.7430 9.18083   2
   0 -30   1 14.4778 9.16357   2
   0 -30  -1 9.20430 7.34640   2
   0  30  -1 20.3086 9.15631   1
   0  30   1 7.24806 6.56334   2
   0  30   1 6.61771 8.23218   1
   1 -30   1 105.006 19.9816   2
  -1  30  -1 131.952 19.7596   1
   1  30   1 156.927 19.0256   2
   2 -30   1 52.6322 13.2523   2
   2  30   1 68.1307 14.9027   2
   2  30   1 82.5681 14.7584   1
  -2  30  -1 92.6828 17.8633   1
   3 -30   1 125.270 18.6767   2
   3  30   1 109.905 17.6360   2
  -3  30  -1 62.3160 15.1508   1
   4 -30   1 103.614 19.1675   2
   4  30   1 127.727 18.7844   2
   5 -30   1 33.2524 10.6949   2
  -5  30  -1 16.9834 12.4394   1
   5  30   1 21.3401 10.0658   2
   6 -30   1 15.1619 10.4117   2
  -6  30  -1 -25.461 9.10144   1
   6  30   1 6.92884 8.27848   2
   7  30   1 15.1544 9.17153   2
  -7  30  -1 5.69531 13.8389   1
   6 -31  -1 16.1248 10.1730   2
  -6  31   1 11.4070 12.4698   1
   6  31  -1 -14.806 6.62534   2
   5 -31  -1 20.0841 11.9452   2
   5  31  -1 20.5340 10.0343   2
  -5  31   1 23.6998 13.3056   1
   4 -31  -1 8.18506 9.93690   2
   4  31  -1 13.7100 8.85303   2
  -4  31   1 5.58353 9.07402   1
   3 -31  -1 8.38683 10.2103   2
  -3  31   1 35.7728 11.9001   1
   3  31  -1 24.2926 10.0939   2
   2 -31  -1 19.7497 9.70006   2
  -2  31   1 5.00645 10.5983   1
   2  31  -1 44.1149 14.2281   2
   2  31  -1 11.3321 8.71273   1
   1 -31  -1 20.1150 9.73054   2
   1  31  -1 36.5675 14.5522   1
   1  31  -1 29.4413 9.44406   2
  -1  31   1 18.3168 10.1461   1
   0 -31   1 63.2257 16.2439   2
   0  31  -1 61.2298 13.4601   1
   0  31  -1 103.205 17.7042   2
   0  31   1 41.6893 11.7048   2
   0  31   1 56.9531 13.7961   1
   1 -31   1 23.5641 9.00340   2
   1  31   1 35.4641 11.9652   2
   1  31   1 16.5286 11.1356   1
  -1  31  -1 12.5405 11.0687   1
   2 -31   1 140.841 20.6388   2
   2  31   1 122.603 19.3505   2
  -2  31  -1 117.311 21.1916   1
   2  31   1 103.794 18.1215   1
   3 -31   1 26.1165 10.7837   2
   3  31   1 24.8134 12.1742   2
  -3  31  -1 33.1412 16.7051   1
   4 -31   1 35.5350 11.6393   2
  -4  31  -1 30.7787 12.0432   1
   4  31   1 39.2473 11.9466   2
   5 -31   1 -16.206 7.15815   2
  -5  31  -1 0.18028 12.0804   1
   5  31   1 -0.7492 7.45995   2
   6 -31   1 107.759 27.9820   2
   6  31   1 60.0239 13.5624   2
  -6  31  -1 58.5748 18.8301   1
   4 -32  -1 34.2671 17.7505   2
  -4  32   1 64.4698 17.6152   1
   4  32  -1 58.6666 14.2450   2
   3 -32  -1 -12.468 11.2095   2
   3  32  -1 8.52955 9.71746   2
  -3  32   1 -6.7891 9.82612   1
   2 -32  -1 12.5476 9.78328   2
  -2  32   1 6.90174 10.9780   1
   2  32  -1 -0.3076 10.5723   1
   2  32  -1 9.65293 8.10753   2
   1 -32  -1 52.7273 14.2760   2
  -1  32   1 33.5712 12.4504   1
   1  32  -1 85.5248 16.9664   2
   0  32   1 -5.9656 8.32724   2
   0  32  -1 -1.5027 9.14330   2
   1 -32   1 28.1629 10.1423   2
   1  32   1 18.0559 10.5851   1
   1  32   1 16.9469 9.13269   2
  -1  32  -1 12.5326 10.4286   1
   2 -32   1 4.52319 9.19683   2
  -2  32  -1 -0.4178 12.3107   1
   2  32   1 9.00036 8.00924   2
   3 -32   1 11.4410 9.65308   2
  -3  32  -1 7.67822 11.4341   1
   3  32   1 30.4971 11.2863   2
   4 -32   1 -13.732 8.07132   2
  -4  32  -1 -2.8347 10.9333   1
   4  32   1 -8.6967 7.47513   2
   1  33  -1 -1.9981 9.06737   2
   1  33  -1 -0.5927 10.7948   1
  -1  33   1 2.68421 8.42711   2
   0  33  -1 15.7583 11.1977   2
   0  33   1 23.3137 10.1658   2
   1 -33   1 0.47261 10.4733   2
   1  33   1 24.8898 12.0370   1
   1  33   1 1.57679 8.47367   2
  17   0  -2 -2.6568 7.19594   2
 -17   0   2 -6.4001 11.5710   1
 -16   0   2 19.2284 10.3189   1
  16   0  -2 12.7562 7.55103   2
  15   0  -2 8.79670 5.77095   2
 -15   0   2 -5.0966 6.53053   1
  14   0  -2 7.38075 5.87803   2
 -14   0   2 12.2914 7.00192   1
  13   0  -2 4.19677 4.62692   2
 -12   0   2 76.9759 10.7239   1
  12   0  -2 75.3961 10.3989   2
  11   0  -2 4.31540 3.60311   2
 -11   0   2 8.10636 4.38948   1
  10   0  -2 1783.55 70.5850   2
 -10   0   2 1851.72 68.9076   1
   9   0  -2 -0.0862 2.04355   2
  -9   0   2 0.24157 2.58823   1
  -8   0   2 175.229 11.7783   1
   8   0  -2 167.478 12.0927   2
  -7   0   2 3.76418 2.05207   1
   7   0  -2 0.88162 1.23995   2
   6   0  -2 288.399 14.6275   2
  -6   0   2 257.229 13.7806   1
   6   0  -2 279.811 14.1811   1
   5   0  -2 0.14035 2.00622   1
  -5   0   2 0.16515 1.18982   1
   5   0  -2 1.01127 1.07456   2
  -4   0   2 2849.03 97.4716   1
  -4   0   2 2913.51 97.8534   2
   4   0  -2 2942.92 97.6046   1
   3   0  -2 0.61045 0.92713   2
  -3   0   2 10.6538 2.02700   1
   3   0  -2 -0.1536 0.87205   1
   2   0  -2 578.430 21.0792   1
  -2   0   2 598.789 20.9684   2
   2   0  -2 609.425 21.0086   2
  -2   0   2 567.662 21.1023   1
  -1   0   2 0.23201 0.45920   1
  -1   0   2 0.22635 0.28652   2
   0   0  -2 -0.7039 1.58848   3
   1   0   2 -0.2942 0.45937   1
   1   0   2 0.33468 0.45519   2
  -1   0  -2 0.87850 0.52670   2
  -1   0  -2 1.05866 0.68842   1
  -2   0  -2 1458.26 48.4006   1
   2   0   2 1465.02 48.5042   1
  -2   0  -2 1376.21 48.2784   2
   2   0   2 1377.12 48.3436   2
   3   0   2 1.21044 1.02137   2
  -3   0  -2 0.67171 0.97823   1
  -3   0  -2 0.72740 0.93388   2
  -3   0  -2 -0.7317 1.09481   1
  -4   0  -2 309.247 14.4450   2
   4   0   2 314.667 14.5829   2
  -4   0  -2 318.182 14.1207   1
  -4   0  -2 317.844 14.5194   1
  -5   0  -2 1.31127 1.61852   1
   5   0   2 -0.9072 0.92340   2
  -5   0  -2 1.95954 1.62762   1
  -6   0  -2 1089.15 41.9124   1
   6   0   2 1149.33 43.0421   2
  -6   0  -2 1052.66 40.8600   1
  -7   0  -2 -0.0698 2.41552   1
   7   0   2 -0.9034 1.95407   2
  -8   0  -2 371.130 21.6993   1
   8   0   2 371.739 20.4733   2
   9   0   2 0.87861 2.66281   2
  -9   0  -2 0.61662 3.02337   1
 -10   0  -2 168.569 13.5825   1
  10   0   2 192.170 15.1308   2
 -11   0  -2 2.15496 3.84109   1
  11   0   2 -4.5200 3.64736   2
  12   0   2 53.7552 10.1581   2
  13   0   2 -2.4349 3.79785   2
  14   0   2 78.9984 13.6584   2
 -14   0  -2 95.2260 14.7950   1
  15   0   2 -5.7072 5.87206   2
 -15   0  -2 3.61405 7.80724   1
  16   0   2 -8.1465 6.87927   2
 -16   0  -2 -15.259 9.94408   1
 -17   0  -2 1.38176 13.0007   1
  17   0   2 12.5170 10.1814   2
  17  -1  -2 27.0977 11.3494   2
 -17  -1   2 6.02909 17.0947   1
  17   1  -2 17.5465 8.14654   2
 -16  -1   2 3.65884 8.50972   1
  16  -1  -2 12.5195 7.93765   2
 -16   1   2 2.61807 9.07204   1
  16   1  -2 -1.6884 6.91792   2
  15  -1  -2 137.540 16.3292   2
 -15  -1   2 157.288 16.6358   1
  15   1  -2 146.148 17.1881   2
 -15   1   2 164.325 17.1629   1
  14  -1  -2 37.7516 10.8693   2
 -14  -1   2 32.5322 9.83102   1
  14   1  -2 15.3244 7.28838   2
 -14   1   2 40.7595 10.4183   1
  13  -1  -2 392.157 26.2027   2
 -13   1   2 423.310 26.0105   1
  13   1  -2 420.941 26.7695   2
 -12  -1   2 0.75312 3.93664   1
  12  -1  -2 2.68488 4.02603   2
  12   1  -2 2.98226 3.81552   2
 -12   1   2 -3.3676 4.39416   1
 -11  -1   2 659.602 30.1288   1
  11  -1  -2 612.339 32.0520   2
  11   1  -2 637.359 32.4478   2
 -11   1   2 627.717 30.9638   1
  10  -1  -2 7.69676 3.45095   2
 -10  -1   2 8.74304 3.95734   1
  10   1  -2 8.93391 3.53700   2
 -10   1   2 10.6020 4.59341   1
   9  -1  -2 169.033 12.6300   2
  -9  -1   2 172.410 13.3661   1
   9   1  -2 176.370 12.8627   2
  -9   1   2 144.340 11.8595   1
   8  -1  -2 232.806 14.4612   2
  -8  -1   2 219.960 12.8920   1
  -8   1   2 200.693 13.4975   1
   8   1  -2 223.466 14.1121   2
   7  -1  -2 119.678 9.17930   2
  -7  -1   2 114.193 8.41744   1
   7   1  -2 108.900 8.53029   1
  -7   1   2 125.944 9.36808   1
   7   1  -2 125.483 9.30730   2
   6  -1  -2 -0.6806 1.13705   2
  -6  -1   2 1.43447 1.77550   1
   6  -1  -2 -0.8362 2.03038   1
   6   1  -2 -2.1404 1.68850   1
   6   1  -2 -1.7928 1.27694   2
  -6   1   2 0.39682 1.52165   1
   5  -1  -2 1460.20 50.9475   2
  -5  -1   2 1396.93 49.5833   1
   5  -1  -2 1358.80 50.6529   1
  -5   1   2 1400.21 50.8389   1
   5   1  -2 1381.83 49.5661   1
   5   1  -2 1431.17 51.0121   2
  -4  -1   2 97.0538 6.08567   1
   4  -1  -2 108.169 6.77797   2
   4  -1  -2 104.105 7.01467   1
  -4   1   2 120.593 7.18127   1
   4   1  -2 110.051 6.87783   2
   4   1  -2 106.046 6.28702   1
  -4   1   2 107.969 6.71006   2
  -3  -1   2 60.4722 4.32519   2
  -3  -1   2 61.7689 4.00145   1
   3  -1  -2 56.9036 4.56657   1
   3  -1  -2 69.3452 4.47488   2
   3   1  -2 60.1381 3.92750   1
  -3   1   2 59.0129 4.64233   1
   3   1  -2 64.7726 4.38270   2
  -3   1   2 58.3939 4.23669   2
  -2  -1   2 4.52408 1.14655   1
  -2  -1   2 7.01967 1.36745   2
   2  -1  -2 4.82257 1.50485   1
   2  -1  -2 8.07566 1.39590   2
  -2   1   2 10.1821 1.74643   1
   2   1  -2 5.85723 1.25662   1
  -2   1   2 7.27085 1.33848   2
   2   1  -2 6.02256 1.20593   2
  -1  -1   2 3448.57 115.265   1
   1  -1  -2 3435.03 115.859   1
  -1  -1   2 3538.05 115.097   2
  -1   1   2 3918.16 114.981   2
  -1   1   2 3432.27 115.842   1
   1   1  -2 3532.93 115.828   1
   1   1  -2 3470.68 115.078   2
   0  -1  -2 72.2316 3.76426   1
   0  -1   2 84.2283 3.99960   1
   0  -1   2 83.2953 3.41210   2
   0   1   2 86.9557 3.49647   2
   0   1  -2 70.3755 5.08369   1
  -1  -1  -2 543.100 19.1897   2
   1  -1   2 535.890 19.2161   2
  -1  -1  -2 561.386 19.1722   1
   1  -1   2 524.798 19.7774   1
  -1   1  -2 534.519 19.1890   2
   1   1   2 573.151 19.2720   2
   1   1   2 569.347 19.1835   1
  -1   1  -2 522.233 19.7269   1
  -2  -1  -2 109.672 5.79314   2
   2  -1   2 107.598 5.78230   2
   2  -1   2 105.362 6.08826   1
  -2  -1  -2 113.505 5.44332   1
   2   1   2 108.830 5.41132   1
   2   1   2 114.820 5.84907   2
  -2   1  -2 96.7253 5.56612   2
  -2   1  -2 109.312 6.11923   1
  -3  -1  -2 38.0459 4.44011   2
   3  -1   2 51.6067 4.22443   2
  -3  -1  -2 45.8888 3.58441   1
   3   1   2 53.2743 3.93301   1
   3   1   2 54.6076 4.29765   2
  -3   1  -2 55.4850 4.74709   1
   4  -1   2 17.7730 3.07425   2
  -4  -1  -2 20.4520 3.01527   1
  -4  -1  -2 20.4646 3.21262   2
  -4  -1  -2 21.4398 2.99401   1
   4   1   2 22.3842 3.28415   2
  -4   1  -2 23.8866 3.67644   1
  -4   1  -2 21.1158 3.90920   1
  -4   1  -2 22.0199 3.26886   2
   5  -1   2 1104.96 40.8636   2
  -5  -1  -2 1035.27 40.7216   1
  -5  -1  -2 1052.89 39.5050   1
   5   1   2 1088.16 40.7575   2
  -5   1  -2 1084.10 40.1852   1
  -5   1  -2 1049.47 40.7022   1
   6  -1   2 173.299 11.4951   2
  -6  -1  -2 172.675 9.92599   1
  -6  -1  -2 184.344 10.7084   1
   6   1   2 164.764 11.1790   2
  -6   1  -2 163.564 11.1229   1
  -7  -1  -2 16.8841 4.06173   1
   7  -1   2 11.3706 3.67404   2
   7   1   2 10.9718 3.52014   2
  -7   1  -2 11.8092 4.18566   1
   8  -1   2 296.450 17.9424   2
  -8  -1  -2 292.975 16.3933   1
  -8   1  -2 291.946 17.3245   1
   8   1   2 328.236 18.4526   2
  -9  -1  -2 5.47866 3.90767   1
   9  -1   2 0.89764 2.58588   2
  -9   1  -2 6.60153 3.12568   1
   9   1   2 4.81551 3.57197   2
  10  -1   2 19.9721 4.83494   2
 -10  -1  -2 16.8819 5.83654   1
 -10   1  -2 25.6174 6.32009   1
  10   1   2 6.65240 4.07789   2
 -11  -1  -2 212.283 15.3381   1
  11  -1   2 225.178 17.7536   2
 -11   1  -2 215.561 16.8296   1
  11   1   2 227.440 17.7693   2
  12  -1   2 111.161 13.1698   2
  12   1   2 66.9050 11.2328   2
 -12   1  -2 96.9614 12.4233   1
 -13  -1  -2 4.90176 7.07736   1
  13  -1   2 13.2981 7.44623   2
  13   1   2 7.26769 6.52709   2
 -14  -1  -2 8.66401 7.53231   1
  14  -1   2 -0.6991 4.90757   2
 -14   1  -2 1.72122 6.97060   1
  14   1   2 -2.7732 4.97242   2
  15  -1   2 13.5490 8.70728   2
 -15  -1  -2 72.7267 14.6655   1
 -15   1  -2 19.7116 10.5788   1
  15   1   2 32.1384 10.3619   2
  16  -1   2 -1.2475 7.42765   2
 -16  -1  -2 -10.636 9.96643   1
 -16   1  -2 -3.3524 9.58107   1
  16   1   2 5.21472 8.19742   2
  17  -1   2 2.34281 9.77950   2
 -17   1  -2 -5.3689 12.6400   1
  17   1   2 -2.0774 8.31223   2
  17  -2  -2 13.0265 10.1575   2
 -17   2   2 42.9807 15.0854   1
  17   2  -2 24.9650 9.04605   2
 -16  -2   2 67.4005 13.5397   1
  16  -2  -2 93.1190 16.3778   2
 -16   2   2 124.418 17.8308   1
  16   2  -2 79.2041 15.8893   2
 -15  -2   2 42.1320 9.29484   1
  15  -2  -2 61.1143 12.2567   2
 -15   2   2 71.6609 15.1508   1
  15   2  -2 31.3439 9.57638   2
 -14  -2   2 3.06631 5.81857   1
  14  -2  -2 2.81347 5.69303   2
 -14   2   2 22.1706 7.32718   1
  14   2  -2 2.46139 5.60728   2
  13  -2  -2 20.2636 6.09927   2
 -13  -2   2 16.5887 9.94294   1
 -13   2   2 30.8199 8.02545   1
  13   2  -2 21.8838 6.59500   2
  12  -2  -2 85.1922 11.4891   2
 -12   2   2 85.5664 11.6209   1
  12   2  -2 74.7869 10.7045   2
  11  -2  -2 8.76533 3.84623   2
 -11  -2   2 14.9940 4.62728   1
  11   2  -2 17.3830 5.18650   2
 -11   2   2 12.9048 5.29322   1
 -10  -2   2 43.9313 8.98805   1
  10  -2  -2 35.8140 7.04331   2
 -10   2   2 41.6016 7.78719   1
  10   2  -2 39.2799 6.83061   2
  -9  -2   2 45.3782 6.39505   1
   9  -2  -2 43.4864 6.45922   2
  -9   2   2 53.9738 7.80620   1
   9   2  -2 50.9176 6.79017   2
  -8  -2   2 13.3633 3.43889   1
   8  -2  -2 12.5422 3.17174   2
  -8   2   2 12.8965 3.90565   1
   8   2  -2 15.7808 3.98336   1
   8   2  -2 15.9412 4.10417   2
  -7  -2   2 1.18161 1.60708   1
   7  -2  -2 4.23172 2.55588   2
  -7   2   2 2.38261 2.29007   1
   7   2  -2 3.25869 1.72184   2
   7   2  -2 2.95342 2.10791   1
  -6  -2   2 31.5404 3.78538   1
   6  -2  -2 34.3675 4.77744   2
   6   2  -2 28.5105 4.10910   1
  -6   2   2 25.1259 4.64745   1
   6   2  -2 26.4091 4.28201   2
   5  -2  -2 123.262 8.17320   2
  -5  -2   2 128.881 7.13221   1
   5  -2  -2 111.459 8.28905   1
   5   2  -2 118.153 6.97724   1
  -5   2   2 122.299 8.56608   1
   4  -2  -2 74.4323 5.41941   2
   4  -2  -2 81.0896 6.74827   1
  -4  -2   2 72.2032 4.64540   1
  -4  -2   2 63.5436 5.25587   2
  -4   2   2 79.5815 6.11953   1
   4   2  -2 63.8476 5.22401   2
   4   2  -2 64.2213 4.47212   1
  -4   2   2 74.1617 5.29072   2
  -3  -2   2 0.45671 0.95333   2
   3  -2  -2 1.55090 1.41794   1
   3  -2  -2 5.97632 1.55085   2
  -3  -2   2 1.50687 0.91361   1
  -3   2   2 2.13196 1.67030   1
  -3   2   2 1.46413 1.24837   2
   3   2  -2 1.69714 1.03005   2
   3   2  -2 2.24770 1.02865   1
  -2  -2   2 99.2091 5.28849   2
   2  -2  -2 108.036 5.22931   2
   2  -2  -2 95.6145 5.82129   1
  -2  -2   2 97.9918 4.48475   1
  -2   2   2 112.458 5.31194   2
   2   2  -2 103.930 5.33488   2
   2   2  -2 90.4252 4.39528   1
  -2   2   2 97.5488 5.88998   1
  -1  -2   2 1.03190 0.53973   1
   1  -2  -2 1.86763 1.02461   1
   1  -2  -2 1.00488 0.58692   2
   1   2  -2 0.44489 0.43936   2
   1   2  -2 -0.0764 0.50386   2
   1   2  -2 1.40937 0.68490   1
  -1   2   2 0.69100 0.49829   2
  -1   2   2 0.87411 0.78436   1
   0  -2   2 22.7303 2.04268   1
   0  -2   2 22.2571 1.79527   2
   0  -2  -2 20.5914 1.57609   2
   0  -2  -2 22.6891 1.93646   1
   0   2   2 23.5047 1.66619   2
   0   2  -2 21.0324 2.02024   1
   0   2  -2 20.8199 1.71550   2
   0   2   2 22.3913 1.92249   1
   1  -2   2 138.769 6.44914   2
  -1  -2  -2 148.172 6.44549   2
  -1  -2  -2 152.662 6.07705   1
   1  -2   2 146.973 7.15499   1
  -1   2  -2 134.429 6.95393   1
   1   2   2 149.495 6.05113   1
   1   2   2 146.829 6.38687   2
  -1   2  -2 132.292 6.30875   2
   2  -2   2 795.803 29.8799   2
  -2  -2  -2 828.092 29.9358   2
  -2  -2  -2 892.622 28.9229   1
  -2   2  -2 801.823 30.9799   1
  -2   2  -2 787.231 29.7565   2
   2   2   2 902.846 28.9892   1
   2   2   2 851.988 29.9914   2
  -3  -2  -2 36.0942 2.99956   1
  -3  -2  -2 31.7702 3.53078   2
   3  -2   2 31.6758 3.40545   2
   3   2   2 37.4704 3.63758   2
  -3   2  -2 36.7765 4.05311   1
   3   2   2 34.8145 2.89375   1
  -3   2  -2 39.6144 4.14558   1
  -3   2  -2 32.8112 3.48894   2
  -4  -2  -2 3.16096 1.48768   1
   4  -2   2 1.39009 1.55361   2
  -4  -2  -2 3.48127 1.93981   2
  -4  -2  -2 3.87872 1.37161   1
   4   2   2 5.37226 2.08355   2
  -4   2  -2 4.85994 2.29573   1
  -4   2  -2 3.35970 1.59060   2
  -4   2  -2 1.46546 1.83338   1
  -5  -2  -2 201.867 10.2348   1
  -5  -2  -2 192.487 9.80962   1
  -5   2  -2 193.917 11.8673   1
  -5   2  -2 183.468 11.2817   1
   5   2   2 209.149 11.6042   2
  -6  -2  -2 1762.83 62.1886   1
   6  -2   2 1758.44 64.4440   2
  -6  -2  -2 1727.16 61.4557   1
   6   2   2 1776.62 64.4262   2
  -6   2  -2 1769.45 64.8395   1
  -7  -2  -2 314.446 16.0300   1
  -7  -2  -2 330.996 15.6026   1
   7  -2   2 323.727 17.9152   2
   7   2   2 328.681 17.9426   2
  -7   2  -2 327.637 18.1448   1
   8  -2   2 387.695 21.2479   2
  -8  -2  -2 380.038 19.0444   1
  -8   2  -2 393.085 21.3299   1
   8   2   2 409.722 21.5656   2
   9  -2   2 39.5077 7.12903   2
  -9  -2  -2 29.2214 6.13485   1
  -9   2  -2 26.6761 6.05628   1
   9   2   2 23.2402 6.56659   2
  10  -2   2 207.691 16.3752   2
 -10  -2  -2 242.279 15.4809   1
 -10   2  -2 246.730 17.1969   1
  10   2   2 233.538 17.1378   2
  11  -2   2 129.403 13.7636   2
 -11  -2  -2 119.598 10.9865   1
 -11   2  -2 118.631 12.7983   1
  11   2   2 114.543 12.5537   2
  12  -2   2 28.5165 7.62922   2
  12   2   2 25.3408 8.06095   2
 -12   2  -2 23.9025 7.54926   1
 -13  -2  -2 14.4128 6.86939   1
  13  -2   2 8.14421 5.83216   2
  13   2   2 8.12140 5.59980   2
 -13   2  -2 13.7486 7.23186   1
  14  -2   2 34.8221 11.2420   2
 -14  -2  -2 38.4089 10.2981   1
  14   2   2 24.8528 9.51651   2
 -14   2  -2 32.0948 9.80865   1
  15  -2   2 0.89198 7.20377   2
 -15  -2  -2 -5.3023 7.86816   1
  15   2   2 5.05841 6.64545   2
 -15   2  -2 4.14584 7.62398   1
  16  -2   2 3.08324 7.45040   2
 -16  -2  -2 21.2481 11.8646   1
  16   2   2 19.5099 9.53516   2
 -16   2  -2 30.9346 10.7906   1
  17  -2   2 12.7051 10.0492   2
 -17   2  -2 4.83464 12.6256   1
  17   2   2 9.82218 9.33160   2
  17  -3  -2 87.6378 17.8231   2
  17   3  -2 96.5785 16.6056   2
 -17   3   2 102.165 20.2418   1
  16  -3  -2 58.3451 14.0154   2
 -16  -3   2 97.2364 16.2094   1
  16   3  -2 95.9999 16.1006   2
 -16   3   2 137.164 19.4727   1
 -15  -3   2 -0.9099 6.12574   1
  15  -3  -2 3.20459 5.74433   2
  15   3  -2 3.87501 6.14550   2
 -15   3   2 3.63768 7.95640   1
 -14  -3   2 98.9460 12.1744   1
  14  -3  -2 115.372 14.9533   2
  14   3  -2 68.0884 13.1292   2
 -14   3   2 110.513 15.7315   1
 -13  -3   2 27.3178 7.74381   1
  13  -3  -2 31.5832 8.09785   2
  13   3  -2 24.1945 7.96006   2
 -13   3   2 37.3885 9.48957   1
 -12  -3   2 85.4420 9.52060   1
  12  -3  -2 82.2326 10.8840   2
  12   3  -2 71.7129 10.8491   2
 -12   3   2 90.9052 12.1054   1
  11  -3  -2 84.3643 10.4328   2
 -11  -3   2 80.9898 8.89830   1
  11   3  -2 103.760 11.2295   2
 -11   3   2 79.5278 10.6955   1
 -10  -3   2 62.0050 7.40614   1
  10  -3  -2 48.4375 8.14236   2
 -10   3   2 71.5138 9.12653   1
  10   3  -2 72.1910 8.75968   2
  -9  -3   2 23.9224 4.65879   1
   9  -3  -2 14.0552 4.66621   2
  -9   3   2 30.0182 6.37798   1
   9   3  -2 24.1285 5.86130   2
   8  -3  -2 0.87814 2.06622   2
  -8  -3   2 -1.3753 1.94575   1
  -8   3   2 0.53519 3.01068   1
   8   3  -2 -2.8191 2.26002   1
   8   3  -2 -2.0789 1.46006   2
   7  -3  -2 114.199 9.30655   2
  -7  -3   2 126.597 8.04502   1
   7   3  -2 127.939 8.67141   1
   7   3  -2 148.275 10.3313   2
  -7   3   2 124.702 10.1544   1
   6  -3  -2 2242.72 80.7558   2
  -6  -3   2 2267.67 77.7081   1
  -6   3   2 2334.00 81.8227   1
   6   3  -2 2310.55 80.9805   2
   6   3  -2 2279.43 77.8031   1
   5  -3  -2 621.037 26.6397   1
  -5  -3   2 600.131 23.2591   1
   5  -3  -2 642.524 25.9488   2
   5   3  -2 627.974 23.4432   1
  -5   3   2 648.432 26.9608   1
   5   3  -2 667.351 26.2553   2
  -4  -3   2 2891.78 99.1655   2
  -4  -3   2 2926.86 96.4781   1
   4  -3  -2 2976.69 99.1005   2
   4  -3  -2 2963.43 100.270   1
   4   3  -2 2910.71 96.5620   1
   4   3  -2 2953.75 99.2556   2
  -4   3   2 2903.18 98.8239   2
  -4   3   2 2901.94 100.219   1
  -3  -3   2 1453.23 49.3001   1
  -3  -3   2 1452.04 51.6288   2
   3  -3  -2 1563.12 51.6073   2
   3  -3  -2 1491.20 52.7115   1
   3   3  -2 1418.71 49.2954   1
   3   3  -2 1555.96 51.9113   2
  -3   3   2 1476.72 51.3968   2
   2  -3  -2 1081.64 36.2550   2
  -2  -3   2 1040.14 36.4356   2
   2  -3  -2 1028.86 37.3612   1
  -2  -3   2 1005.10 34.6834   1
   2   3  -2 965.754 34.6447   1
  -2   3   2 1125.46 36.3102   2
   2   3  -2 1058.02 36.4882   2
  -2   3   2 1027.74 37.3281   1
   1  -3  -2 1761.96 56.3573   2
  -1  -3   2 1605.69 56.5247   2
   1  -3  -2 1680.91 57.2801   1
  -1  -3   2 1743.33 56.0167   1
   1   3  -2 1634.45 55.8402   1
  -1   3   2 1805.15 56.4057   2
   1   3  -2 1621.15 56.5651   2
  -1   3   2 1630.68 57.1520   1
   0  -3   2 125.843 6.02666   2
   0  -3  -2 137.091 5.97322   2
   0  -3  -2 131.136 6.13270   1
   0  -3   2 117.521 6.10726   1
   0   3  -2 130.636 6.27600   1
   0   3   2 135.510 5.92678   2
   0   3  -2 117.982 5.85917   2
   0   3   2 132.095 6.05965   1
  -1  -3  -2 506.365 19.1240   2
   1  -3   2 498.317 19.2285   2
   1  -3   2 513.742 20.0137   1
  -1  -3  -2 559.346 18.5289   1
   1   3   2 538.634 18.4471   1
   1   3   2 528.577 19.1756   2
  -1   3  -2 499.477 19.1552   2
  -1   3  -2 522.508 20.0453   1
  -2  -3  -2 1.53333 0.71726   1
   2  -3   2 0.28273 0.83329   2
  -2  -3  -2 1.72003 1.03276   2
  -2   3  -2 2.38011 1.38809   1
  -2   3  -2 -0.0791 1.01982   1
   2   3   2 1.77736 0.80453   1
   2   3   2 0.63363 0.70783   2
  -2   3  -2 1.33839 1.26673   2
  -3  -3  -2 6.30276 1.99703   2
   3  -3   2 2.97429 1.14941   2
  -3  -3  -2 6.52664 1.36286   1
   3   3   2 6.79234 1.30510   1
  -3   3  -2 5.60141 2.01516   1
  -3   3  -2 4.69621 1.84905   1
  -3   3  -2 4.04799 1.58016   2
   3   3   2 5.35706 1.56442   2
  -4  -3  -2 187.532 8.15262   1
   4  -3   2 174.035 9.84386   2
  -4  -3  -2 163.692 8.15046   1
  -4  -3  -2 172.797 9.85670   2
  -4   3  -2 174.467 10.2849   1
  -4   3  -2 157.920 10.3380   1
  -4   3  -2 155.423 9.38113   2
   4   3   2 170.147 9.72834   2
  -5  -3  -2 62.3013 4.70515   1
   5  -3   2 69.3132 9.31423   2
  -5  -3  -2 66.8683 4.81957   1
   5   3   2 55.5514 6.76809   2
  -5   3  -2 67.0061 6.63804   1
  -6  -3  -2 795.988 30.9786   1
  -6  -3  -2 815.409 30.6491   1
   6  -3   2 833.146 34.0392   2
   6   3   2 812.049 33.6113   2
  -6   3  -2 851.749 37.7897   1
   7  -3   2 2862.06 101.750   2
  -7  -3  -2 2833.65 98.0345   1
  -7  -3  -2 2843.04 97.4309   1
   7   3   2 2865.88 101.650   2
  -7   3  -2 2916.98 102.503   1
  -8  -3  -2 130.605 9.49742   1
  -8  -3  -2 133.525 9.26634   1
   8  -3   2 130.692 11.3059   2
   8   3   2 128.551 11.2305   2
  -8   3  -2 139.387 12.0692   1
  -9  -3  -2 83.2638 8.11532   1
   9  -3   2 87.8477 9.92237   2
   9   3   2 92.7778 10.0511   2
  -9   3  -2 82.2067 10.3361   1
  10  -3   2 318.246 20.4178   2
 -10   3  -2 313.749 20.4035   1
  10   3   2 315.775 20.4473   2
  11  -3   2 46.2080 9.32909   2
 -11  -3  -2 68.0295 8.79039   1
  11   3   2 57.9612 9.85746   2
 -11   3  -2 55.3771 10.3569   1
 -12  -3  -2 266.326 18.6724   1
  12  -3   2 259.892 20.2785   2
 -12   3  -2 258.725 19.8057   1
  12   3   2 242.453 19.6651   2
  13  -3   2 53.3314 11.1768   2
 -13  -3  -2 56.4945 10.3029   1
 -13   3  -2 92.8899 13.9425   1
  13   3   2 78.8484 12.5875   2
  14  -3   2 8.71196 6.45001   2
 -14  -3  -2 22.1531 7.36762   1
 -14   3  -2 1.45159 6.57111   1
  14   3   2 4.68742 6.07438   2
  15  -3   2 34.6952 11.5066   2
 -15  -3  -2 30.5165 9.57742   1
  15   3   2 26.2105 9.52259   2
 -15   3  -2 12.6342 9.74430   1
  16  -3   2 92.0345 17.6977   2
  16   3   2 98.5567 17.1175   2
 -16   3  -2 96.1340 18.8010   1
  17  -3   2 18.5433 10.5256   2
 -17   3  -2 20.1304 12.7983   1
  17   3   2 29.9941 9.57041   2
  17  -4  -2 -5.0579 9.47876   2
  17   4  -2 6.19223 8.25694   2
 -17   4   2 -11.834 11.1252   1
  16  -4  -2 -0.9276 7.39759   2
 -16   4   2 4.63064 9.22490   1
  16   4  -2 14.6005 7.15679   2
 -15  -4   2 35.6770 8.36682   1
  15  -4  -2 26.3071 9.32642   2
  15   4  -2 27.5161 9.16227   2
  14  -4  -2 19.0488 7.84445   2
 -14  -4   2 19.5096 6.65709   1
 -14   4   2 25.4537 8.81045   1
  14   4  -2 13.0967 6.31705   2
 -13  -4   2 202.333 14.0068   1
  13  -4  -2 236.922 19.5675   2
  13   4  -2 207.302 18.2406   2
 -13   4   2 221.429 19.0527   1
  12  -4  -2 10.0295 4.25358   2
 -12  -4   2 10.1432 6.43370   1
 -12   4   2 16.1261 6.76191   1
  12   4  -2 15.7855 5.77278   2
 -11  -4   2 116.211 9.38202   1
  11  -4  -2 95.3593 12.0165   2
 -11   4   2 139.098 13.8306   1
  11   4  -2 150.563 15.7613   2
  10  -4  -2 428.841 24.7652   2
 -10  -4   2 465.437 20.7990   1
  10   4  -2 452.936 24.8558   2
 -10   4   2 444.734 25.3173   1
   9  -4  -2 36.6497 6.35817   2
  -9  -4   2 28.6795 5.11988   1
  -9   4   2 34.0953 7.51059   1
   9   4  -2 20.5946 4.87117   2
  -8  -4   2 174.627 10.0709   1
   8  -4  -2 181.802 12.7984   2
   8   4  -2 159.796 12.0637   2
  -8   4   2 185.749 13.9104   1
   7  -4  -2 248.902 14.4186   2
  -7  -4   2 223.927 11.1633   1
   7   4  -2 228.397 11.5626   1
  -7   4   2 258.190 15.6705   1
   7   4  -2 245.565 14.4795   2
   6  -4  -2 1738.06 61.6370   2
  -6  -4   2 1598.58 57.1937   1
   6   4  -2 1686.45 57.6162   1
   6   4  -2 1711.55 61.6083   2
   5  -4  -2 149.906 9.26444   2
  -5  -4   2 142.115 6.72856   1
   5   4  -2 135.478 6.78003   1
   5   4  -2 148.647 9.33921   2
  -5   4   2 143.726 9.90594   1
  -4  -4   2 191.660 7.67992   1
   4  -4  -2 203.101 10.3545   2
   4  -4  -2 191.747 11.2196   1
   4   4  -2 184.870 10.2730   2
   4   4  -2 188.452 7.82737   1
  -4   4   2 189.820 10.1193   2
  -3  -4   2 8049.14 259.032   1
   3  -4  -2 8289.90 263.791   1
   3  -4  -2 8228.20 262.100   2
  -3   4   2 8085.79 263.658   1
   3   4  -2 7432.76 258.978   1
   2  -4  -2 9159.19 301.149   1
  -2  -4   2 8574.30 299.832   2
  -2  -4   2 9999.99 298.025   1
   2  -4  -2 9475.75 299.824   2
  -2   4   2 9011.51 301.054   1
   2   4  -2 9278.48 300.140   2
  -2   4   2 9503.07 299.783   2
   2   4  -2 8696.76 297.718   1
  -1  -4   2 838.625 29.0833   1
  -1  -4   2 793.322 29.8882   2
   1  -4  -2 881.804 29.7584   2
   1  -4  -2 818.305 30.4179   1
   1   4  -2 814.215 29.9152   2
  -1   4   2 825.834 30.4547   1
  -1   4   2 913.212 29.8183   2
   1   4  -2 827.337 29.0028   1
   0  -4   2 975.773 35.2432   2
   0  -4  -2 1040.61 35.2676   1
   0  -4  -2 1072.05 35.2859   2
   0  -4   2 998.369 35.4365   1
   0   4  -2 951.286 35.1011   2
   0   4  -2 966.275 35.3151   1
   0   4   2 1023.87 35.1763   1
   0   4   2 1043.46 35.1613   2
  -1  -4  -2 1011.61 33.8719   1
  -1   4  -2 930.961 34.7021   2
  -1   4  -2 1001.15 35.8235   1
   1   4   2 1011.74 34.8641   2
   1   4   2 954.569 34.7451   2
   1   4   2 1017.65 33.7927   1
  -2  -4  -2 202.861 8.01946   1
  -2  -4  -2 210.967 9.85151   2
   2  -4   2 205.058 9.83506   2
  -2   4  -2 185.309 9.43320   2
  -2   4  -2 209.078 10.7440   1
   2   4   2 196.164 9.61222   2
   2   4   2 203.954 7.95889   1
  -3  -4  -2 0.61763 0.70906   1
   3  -4   2 0.66347 0.87256   2
  -3  -4  -2 1.07691 1.31961   2
  -3   4  -2 0.45393 1.20646   2
   3   4   2 2.19967 1.30204   2
   3   4   2 1.78649 0.78644   1
  -3   4  -2 2.04572 1.51868   1
  -3   4  -2 0.96193 1.82474   1
   4  -4   2 888.640 34.2095   2
  -4  -4  -2 948.783 31.1072   1
  -4  -4  -2 881.950 31.2601   1
  -4   4  -2 848.317 35.5501   1
  -4   4  -2 879.360 34.9335   1
   5  -4   2 907.859 36.2561   2
  -5  -4  -2 956.645 32.7584   1
  -5  -4  -2 900.260 32.8778   1
   5   4   2 976.125 36.6601   2
  -5   4  -2 863.787 37.3270   1
  -6  -4  -2 41.3603 4.15096   1
  -6  -4  -2 37.2912 3.80829   1
   6  -4   2 44.0547 5.78557   2
  -6   4  -2 33.8076 6.00614   1
  -7  -4  -2 412.602 18.1570   1
   7  -4   2 444.791 21.8970   2
  -7  -4  -2 386.872 19.4234   1
  -7   4  -2 444.299 22.7130   1
  -8  -4  -2 3603.86 121.318   1
  -8  -4  -2 3518.33 121.379   1
   8  -4   2 3537.07 126.081   2
  -8   4  -2 3641.61 127.438   1
  -9  -4  -2 80.8452 9.44635   1
  -9  -4  -2 106.975 8.37847   1
   9  -4   2 104.143 10.5968   2
  -9   4  -2 107.024 11.4714   1
   9   4   2 115.129 10.9534   2
 -10  -4  -2 3.67532 3.32779   1
  10  -4   2 8.33345 4.23029   2
  10   4   2 3.31425 4.31198   2
 -10   4  -2 2.10309 4.12608   1
  11  -4   2 90.1984 11.7027   2
  11   4   2 113.293 12.6642   2
 -11   4  -2 111.853 13.1827   1
  12  -4   2 181.677 17.3078   2
 -12  -4  -2 182.916 14.0283   1
  12   4   2 188.891 17.2579   2
 -12   4  -2 207.954 17.8092   1
 -13  -4  -2 27.5484 7.20317   1
  13  -4   2 32.4527 9.01132   2
 -13   4  -2 31.7847 11.4477   1
  13   4   2 52.8019 12.6450   2
  14  -4   2 164.408 18.1648   2
 -14  -4  -2 168.032 15.0892   1
 -14   4  -2 171.171 18.8081   1
  14   4   2 176.720 18.6740   2
  15  -4   2 15.4426 8.45628   2
 -15  -4  -2 -7.4983 7.07032   1
 -15   4  -2 -12.483 7.78532   1
  15   4   2 0.46010 7.07155   2
  16  -4   2 1.26986 8.04678   2
  16   4   2 21.4838 10.4915   2
 -16   4  -2 8.30719 10.5760   1
  17  -4   2 21.6168 11.3277   2
 -17   4  -2 2.66128 11.6512   1
  17   4   2 16.7660 8.98172   2
  17  -5  -2 27.9366 12.3171   2
 -17   5   2 40.2578 12.7277   1
  17   5  -2 18.7199 8.81031   2
  16  -5  -2 40.1678 12.6348   2
 -16   5   2 18.9351 10.9694   1
  16   5  -2 18.2991 8.97150   2
  15  -5  -2 98.9347 15.0545   2
  15   5  -2 146.904 17.7822   2
  14  -5  -2 163.870 17.5285   2
 -14   5   2 165.845 17.8751   1
  14   5  -2 178.236 17.6451   2
  13  -5  -2 347.300 24.3176   2
 -13  -5   2 337.225 17.9122   1
 -13   5   2 325.482 27.8212   1
  13   5  -2 335.207 23.7517   2
  12  -5  -2 238.634 18.5910   2
 -12  -5   2 225.700 13.2615   1
 -12   5   2 190.154 17.7502   1
  12   5  -2 208.912 16.9935   2
  11  -5  -2 6.88000 6.93826   2
 -11  -5   2 10.3553 4.65272   1
 -11  -5   2 7.26416 5.67303   1
  11   5  -2 23.6547 9.04673   2
 -11   5   2 21.3087 6.88468   1
 -10  -5   2 62.2848 7.28470   1
  10  -5  -2 73.4280 9.74356   2
 -10  -5   2 73.2436 8.38795   1
 -10   5   2 79.6178 10.1378   1
  10   5  -2 68.8254 8.59835   2
  -9  -5   2 2.91047 2.46191   1
   9  -5  -2 7.83238 4.39735   2
  -9   5   2 8.07286 4.35240   1
   9   5  -2 1.52636 2.57067   2
  -8  -5   2 701.727 26.5397   1
  -8  -5   2 674.446 26.2531   1
   8  -5  -2 734.177 32.0681   2
   8   5  -2 685.002 31.6184   2
  -8   5   2 722.996 33.2570   1
   7  -5  -2 30.9568 5.22327   2
  -7  -5   2 28.1075 3.36212   1
  -7  -5   2 21.2406 3.11810   1
  -7   5   2 21.9467 5.31701   1
   7   5  -2 34.1224 5.41308   2
  -6  -5   2 1028.66 36.0076   1
   6  -5  -2 1023.56 40.7340   2
  -6   5   2 1003.57 42.2749   1
   6   5  -2 1119.42 41.6158   2
   6   5  -2 1055.89 36.3895   1
  -5  -5   2 716.369 25.7983   1
   5  -5  -2 768.481 30.3925   2
   5   5  -2 757.065 26.0984   1
  -5   5   2 798.872 32.3558   1
  -4  -5   2 1070.60 35.9658   1
  -4  -5   2 1142.08 41.1083   2
   4  -5  -2 1127.29 40.4498   2
  -4   5   2 1090.97 41.9853   1
  -4   5   2 1081.01 40.1861   2
   4   5  -2 1039.88 36.0717   1
   4   5  -2 1087.66 40.6051   2
  -3  -5   2 2009.97 60.7570   1
   3  -5  -2 1851.49 65.6922   1
   3  -5  -2 1958.36 64.3186   2
  -3  -5   2 1718.13 64.1194   2
  -3   5   2 1861.17 63.9880   2
   3   5  -2 1758.12 60.5832   1
  -3   5   2 1799.98 65.5769   1
  -2  -5   2 6060.26 185.459   1
   2  -5  -2 5870.66 187.481   2
   2   5  -2 5588.60 185.159   1
  -2   5   2 5854.79 187.423   2
  -2   5   2 5606.28 188.753   1
   2   5  -2 5544.44 187.700   2
   2   5  -2 5396.24 187.660   2
   1  -5  -2 1455.88 48.4540   2
  -1  -5   2 1430.72 47.6787   1
   1  -5  -2 1361.10 49.0822   1
  -1   5   2 1466.21 48.3939   2
   1   5  -2 1320.43 48.4571   2
  -1   5   2 1385.26 49.1166   1
   1   5  -2 1368.23 47.4985   1
   0  -5  -2 3.14587 1.21149   1
   0  -5  -2 2.79734 1.24615   2
   0  -5   2 3.00807 1.28480   2
   0   5  -2 7.73192 1.85430   1
   0   5  -2 -0.3129 0.89959   2
   0   5  -2 1.16370 1.13500   1
   0   5   2 0.59931 0.98860   2
  -1  -5  -2 1583.71 50.1541   1
   1  -5   2 1509.63 51.4426   2
   1   5   2 1427.12 51.1052   2
   1   5   2 1508.22 49.8842   1
  -1   5  -2 1462.09 51.9918   1
   1   5   2 1483.73 51.1205   2
  -1   5  -2 1414.61 51.0306   2
  -1   5  -2 1406.49 52.4157   1
   2  -5   2 4.17358 1.48138   2
  -2  -5  -2 2.10351 0.97628   1
  -2  -5  -2 1.12020 1.00576   2
   2   5   2 3.55842 0.91471   1
  -2   5  -2 8.87486 2.76234   1
  -2   5  -2 2.03768 1.40047   2
  -2   5  -2 11.8561 3.19667   1
   2   5   2 3.15767 1.48873   2
   3  -5   2 198.118 10.8740   2
   3  -5   2 206.153 12.2057   1
  -3  -5  -2 213.145 8.28526   1
  -3  -5  -2 202.290 10.8802   2
   3   5   2 231.385 8.35170   1
  -3   5  -2 206.045 11.7384   1
  -3   5  -2 223.437 12.5413   1
   3   5   2 208.723 10.9091   2
  -3   5  -2 191.435 10.6572   2
  -4  -5  -2 25.5392 2.25294   1
   4  -5   2 24.3413 3.70846   2
   4   5   2 25.1736 3.58116   2
   4   5   2 24.7993 2.30991   1
  -4   5  -2 27.6815 4.72549   1
  -5  -5  -2 11.2866 2.03105   1
   5  -5   2 17.8090 4.13393   2
  -5  -5  -2 10.5944 2.07363   1
   5   5   2 11.7590 2.84417   2
  -6  -5  -2 577.456 21.8859   1
   6  -5   2 563.275 26.0033   2
  -6  -5  -2 582.093 21.5934   1
   6   5   2 597.966 26.2278   2
  -6   5  -2 558.903 27.4498   1
  -7  -5  -2 437.997 18.2541   1
  -7  -5  -2 457.847 18.0444   1
   7  -5   2 430.566 22.3900   2
  -7   5  -2 455.590 23.9391   1
   7   5   2 426.036 22.1729   2
   8  -5   2 363.337 20.5287   2
  -8  -5  -2 353.176 16.1095   1
  -8   5  -2 340.355 21.3643   1
   8   5   2 359.066 20.1173   2
  -9  -5  -2 309.376 15.0535   1
   9  -5   2 295.508 19.2409   2
  -9  -5  -2 298.412 14.8478   1
   9   5   2 295.183 19.0135   2
  -9   5  -2 351.430 21.0445   1
  10  -5   2 75.9423 9.90719   2
 -10  -5  -2 75.6263 8.09064   1
 -10   5  -2 56.6366 10.1868   1
  10   5   2 92.5174 10.6706   2
 -11  -5  -2 105.572 9.07940   1
  11  -5   2 108.063 12.2700   2
  11   5   2 106.028 11.9215   2
 -11   5  -2 97.1071 13.0614   1
  12  -5   2 59.4975 11.2763   2
 -12  -5  -2 61.5344 8.46651   1
 -12   5  -2 60.4533 10.9932   1
  12   5   2 71.1736 11.3520   2
  13  -5   2 150.675 17.0211   2
 -13  -5  -2 165.990 15.5585   1
 -13   5  -2 155.188 17.0091   1
  13   5   2 174.890 17.3272   2
  14  -5   2 3.23491 5.42251   2
  14   5   2 5.07144 6.66296   2
 -14   5  -2 3.29169 7.28676   1
  15  -5   2 -1.5219 7.38841   2
 -15   5  -2 -6.5634 8.10937   1
  15   5   2 -6.0990 6.78456   2
  16  -5   2 23.6189 11.1562   2
  16   5   2 14.7005 9.26068   2
 -16   5  -2 9.14334 10.6392   1
  17  -5   2 -20.599 7.36760   2
 -17   5  -2 9.91710 13.0155   1
  17   5   2 5.00279 8.65769   2
  17  -6  -2 23.0145 11.4273   2
 -17   6   2 51.9938 15.3918   1
  17   6  -2 43.2538 12.6027   2
  16  -6  -2 -6.3939 6.87260   2
  16   6  -2 10.2450 8.15383   2
 -16   6   2 10.5693 10.2616   1
  15  -6  -2 -3.4651 6.80637   2
 -15   6   2 -2.1156 7.97535   1
  15   6  -2 -2.4171 5.76842   2
 -14  -6   2 6.69308 4.88660   1
  14  -6  -2 11.0727 7.55985   2
  14   6  -2 9.02344 6.09087   2
 -14   6   2 0.35593 7.99034   1
  13  -6  -2 30.0392 8.47511   2
 -13  -6   2 29.6729 5.34993   1
  13   6  -2 19.5305 7.14580   2
 -13   6   2 20.3443 7.80308   1
 -12  -6   2 68.9827 9.03263   1
 -12  -6   2 70.6172 7.65956   1
  12  -6  -2 99.9100 12.0691   2
 -12   6   2 86.9105 13.1629   1
  12   6  -2 88.8550 11.3395   2
 -11  -6   2 9.04299 4.51303   1
  11  -6  -2 10.5691 5.11354   2
 -11  -6   2 7.02793 3.57447   1
 -11   6   2 4.19134 4.26902   1
  11   6  -2 2.15707 3.66934   2
  10  -6  -2 9.15187 4.96746   2
 -10   6   2 9.39834 4.37338   1
  -9  -6   2 163.300 8.46364   1
  -9  -6   2 161.771 8.46529   1
   9  -6  -2 137.415 12.4845   2
   9   6  -2 171.971 13.5025   2
  -9   6   2 151.267 13.9929   1
  -8  -6   2 145.551 7.18923   1
   8  -6  -2 143.635 11.1570   2
  -8  -6   2 130.635 6.87131   1
  -8   6   2 125.699 11.9362   1
   8   6  -2 147.263 11.4276   2
   7  -6  -2 878.448 36.8972   2
  -7  -6   2 874.720 30.5880   1
  -7  -6   2 908.326 30.6350   1
  -7   6   2 912.302 39.1806   1
   7   6  -2 851.782 36.8367   2
  -6  -6   2 472.175 16.4187   1
   6  -6  -2 464.568 21.9457   2
  -6   6   2 470.450 23.7241   1
   6   6  -2 476.925 22.4059   2
   5  -6  -2 99.1375 9.19209   2
  -5   6   2 95.8988 10.0584   1
   5   6  -2 95.3379 7.74506   2
   4  -6  -2 737.874 28.9058   2
   4   6  -2 724.037 29.0530   2
  -4   6   2 711.990 30.5421   1
   3  -6  -2 563.794 22.2800   2
   3  -6  -2 553.256 23.7353   1
  -3  -6   2 546.558 22.4808   2
   3   6  -2 505.736 18.5305   1
  -3   6   2 533.464 23.5315   1
  -3   6   2 568.967 22.1846   2
   3   6  -2 545.854 22.4755   2
   2  -6  -2 328.736 15.8162   1
   2  -6  -2 355.280 14.9140   2
  -2   6   2 315.335 15.5557   1
  -2   6   2 334.056 14.5977   2
   2   6  -2 319.278 14.9052   2
   2   6  -2 363.940 13.3747   1
   2   6  -2 330.847 12.7309   1
   2   6  -2 326.787 14.9768   2
   1  -6  -2 1428.30 48.8014   2
   1  -6  -2 1376.39 49.5130   1
  -1  -6   2 1316.29 49.0030   2
  -1   6   2 1435.92 48.7653   2
   1   6  -2 1382.76 47.8810   1
   1   6  -2 1425.22 48.5062   1
  -1   6   2 1371.07 49.4069   1
   0  -6  -2 621.202 23.3660   1
   0  -6  -2 633.129 23.5644   2
   0  -6   2 570.724 23.4015   2
   0   6  -2 605.138 23.9635   1
   0   6   2 623.425 23.1653   1
   0   6   2 617.807 23.2718   2
   0   6  -2 612.504 23.5847   1
   0   6  -2 560.353 24.5095   2
  -1  -6  -2 939.427 31.3667   1
   1  -6   2 885.381 32.6262   2
  -1  -6  -2 890.208 32.4737   2
  -1   6  -2 797.281 31.9839   2
  -1   6  -2 851.849 33.5832   1
   1   6   2 886.083 30.9967   1
   2  -6   2 591.064 23.8088   2
  -2  -6  -2 600.597 21.3442   1
   2   6   2 565.637 23.4559   2
   2   6   2 603.573 21.1969   1
  -2   6  -2 589.987 23.6080   2
  -2   6  -2 604.772 24.8038   1
  -2   6  -2 616.678 25.6075   1
   2   6   2 585.357 23.6308   2
   3  -6   2 77.7828 6.30336   2
  -3  -6  -2 85.8314 4.08907   1
  -3  -6  -2 79.9124 6.40233   2
   3  -6   2 96.3351 8.95859   1
  -3   6  -2 80.5713 7.97387   1
   3   6   2 84.5937 3.95800   1
  -3   6  -2 72.3098 6.19359   2
  -3   6  -2 71.0318 7.14769   1
  -4  -6  -2 1548.82 52.6642   1
   4  -6   2 1569.54 57.7756   2
   4   6   2 1611.42 57.8380   2
   4   6   2 1616.37 52.8063   1
  -4   6  -2 1622.48 60.1979   1
  -5  -6  -2 92.9669 4.55787   1
  -5  -6  -2 104.686 5.06067   1
  -5   6  -2 105.173 9.58352   1
   5   6   2 88.2141 7.72217   2
  -6  -6  -2 0.90219 1.16594   1
   6  -6   2 1.44333 2.05859   2
  -6  -6  -2 0.77867 1.18680   1
  -6   6  -2 2.24461 2.50207   1
   6   6   2 3.05942 1.76226   2
   7  -6   2 173.025 12.2739   2
  -7  -6  -2 154.721 7.55758   1
  -7  -6  -2 149.590 7.71353   1
   7   6   2 149.546 11.5939   2
  -7   6  -2 148.187 13.0069   1
  -8  -6  -2 177.822 9.16098   1
   8  -6   2 177.337 13.4586   2
   8   6   2 160.410 12.8428   2
  -8   6  -2 179.754 14.2615   1
   9  -6   2 21.3200 6.09605   2
  -9  -6  -2 34.3512 4.49973   1
   9   6   2 28.7660 6.80593   2
  -9   6  -2 28.2659 6.86751   1
 -10  -6  -2 66.0044 7.19300   1
  10  -6   2 80.6973 9.94527   2
  10   6   2 76.5429 9.71655   2
 -10   6  -2 71.6623 11.1274   1
 -11  -6  -2 553.306 22.7688   1
 -11  -6  -2 456.581 21.8389   1
  11  -6   2 519.956 29.5300   2
  11   6   2 546.098 29.7172   2
 -11   6  -2 538.946 30.6609   1
 -12  -6  -2 242.614 16.4501   1
  12  -6   2 301.232 21.8938   2
 -12  -6  -2 284.519 15.2983   1
  12   6   2 306.003 21.8926   2
 -12   6  -2 334.498 33.1408   1
 -13  -6  -2 25.0286 5.56125   1
  13  -6   2 22.2228 9.24123   2
  13   6   2 25.3947 9.00523   2
 -13   6  -2 18.5250 8.58302   1
 -14  -6  -2 99.2159 11.2586   1
  14  -6   2 113.952 16.3114   2
  14   6   2 108.627 15.4069   2
 -14   6  -2 136.331 16.8763   1
  15  -6   2 9.44700 11.4366   2
  16  -6   2 0.23459 8.10036   2
 -16   6  -2 -4.9124 10.9766   1
  16   6   2 4.41913 7.42732   2
  17  -6   2 35.7036 13.2234   2
 -17   6  -2 32.5988 15.7844   1
  17   6   2 49.3398 12.4575   2
  17  -7  -2 71.0896 16.5923   2
 -17   7   2 52.0949 13.5706   1
  17   7  -2 58.7911 20.7807   2
  16  -7  -2 15.1166 9.05781   2
  16   7  -2 4.98141 6.93102   2
  15  -7  -2 -8.2275 5.63008   2
  15   7  -2 0.86794 5.32433   2
 -15   7   2 8.75124 9.57228   1
  14  -7  -2 -5.5008 5.27642   2
  14   7  -2 2.31239 6.37153   2
 -14   7   2 0.56477 6.22807   1
 -13  -7   2 63.0734 5.57233   1
  13  -7  -2 38.7930 9.96892   2
 -13   7   2 42.0621 10.4722   1
  13   7  -2 45.4972 10.0623   2
 -12  -7   2 37.7127 6.39851   1
 -12  -7   2 46.8670 5.39377   1
  12  -7  -2 52.0791 9.52157   2
  12   7  -2 59.8222 9.79489   2
 -12   7   2 55.5986 14.9030   1
 -11  -7   2 46.5995 5.10789   1
 -11  -7   2 36.9799 4.43852   1
  11  -7  -2 47.3753 8.69633   2
  11   7  -2 49.9051 8.67234   2
 -11   7   2 33.2906 8.55398   1
 -10  -7   2 5.85826 2.05434   1
  10  -7  -2 2.57734 3.73452   2
 -10  -7   2 3.67646 2.04212   1
 -10   7   2 3.36530 3.73374   1
  10   7  -2 4.94531 3.43119   2
  -9  -7   2 556.921 19.8806   1
   9  -7  -2 560.795 28.2048   2
  -9  -7   2 541.698 19.7501   1
  -9   7   2 558.045 30.0483   1
   9   7  -2 576.200 28.4460   2
  -8  -7   2 182.409 8.15099   1
  -8  -7   2 219.055 8.74767   1
   8  -7  -2 223.198 14.9153   2
  -8   7   2 234.541 16.4787   1
   8   7  -2 225.550 14.8292   2
   7  -7  -2 105.990 9.37462   2
  -7   7   2 116.455 11.0048   1
   7   7  -2 101.271 9.24164   2
   6  -7  -2 552.139 25.1229   2
   6   7  -2 555.923 25.3446   2
  -6   7   2 540.970 26.9108   1
   5  -7  -2 2978.75 102.380   2
   5   7  -2 2999.53 102.849   2
  -5   7   2 2872.72 104.605   1
   4  -7  -2 88.5023 7.00713   2
   4   7  -2 93.2705 7.35615   2
  -4   7   2 80.7033 7.86157   1
   3  -7  -2 344.888 16.0985   2
   3   7  -2 358.678 16.6967   2
  -3   7   2 370.918 17.9304   1
   3   7  -2 340.796 12.7559   1
   3   7  -2 354.999 13.1218   1
  -3   7   2 357.102 16.1771   2
   2  -7  -2 14.7780 3.31565   1
   2  -7  -2 20.2419 3.22755   2
   2   7  -2 21.7835 2.49023   1
   2   7  -2 23.5273 3.63768   2
  -2   7   2 18.7908 3.17495   2
   2   7  -2 15.0241 2.92526   2
   2   7  -2 20.0434 2.49571   1
  -2   7   2 17.6457 3.64109   1
   1  -7  -2 34.3431 4.35924   1
  -1  -7   2 43.4585 4.44342   2
   1  -7  -2 35.0692 3.89842   2
   1   7  -2 37.9816 4.11835   2
   1   7  -2 38.3581 3.56345   1
  -1   7   2 40.5858 4.32829   1
  -1   7   2 41.6477 4.02522   2
   1   7  -2 39.6604 3.90712   1
   0  -7  -2 608.359 22.9380   1
   0  -7  -2 593.162 23.0957   2
   0  -7   2 538.543 22.9408   2
   0   7   2 591.800 22.6342   1
   0   7  -2 532.981 22.6141   2
   0   7  -2 568.134 23.3151   1
   0   7  -2 585.632 23.0007   1
   0   7   2 564.101 22.6540   2
  -1  -7  -2 341.947 14.2592   1
   1  -7   2 356.768 15.7528   2
  -1  -7  -2 344.805 15.3787   2
   1   7   2 345.732 14.1015   1
   1   7   2 338.409 15.3290   2
  -1   7  -2 353.757 16.5419   1
  -1   7  -2 326.816 15.1651   2
  -1   7  -2 311.385 15.5471   1
   2  -7   2 338.018 15.3869   2
  -2  -7  -2 340.653 12.9495   1
   2  -7   2 311.255 16.2206   1
   2   7   2 318.214 12.5645   1
   2   7   2 308.220 14.8731   2
   2   7   2 339.686 15.2209   2
  -2   7  -2 292.839 16.1238   1
  -2   7  -2 298.737 14.5971   2
  -3  -7  -2 381.621 14.3804   1
   3  -7   2 384.210 18.0299   2
  -3   7  -2 387.577 19.7714   1
   3   7   2 376.863 17.7850   2
   3   7   2 413.083 14.2889   1
  -4  -7  -2 27.1767 1.98837   1
   4  -7   2 24.1780 3.98233   2
   4   7   2 25.5312 4.18438   2
   4   7   2 28.0785 1.88235   1
  -4   7  -2 31.3938 5.25945   1
  -5  -7  -2 2044.93 63.1391   1
  -5   7  -2 1816.41 70.7698   1
   5   7   2 1745.39 67.9137   2
  -6  -7  -2 196.499 7.76788   1
   6  -7   2 193.814 13.0985   2
   6   7   2 205.920 13.1456   2
  -6   7  -2 220.820 15.5359   1
  -7  -7  -2 313.078 11.8451   1
  -7  -7  -2 305.778 11.9838   1
   7  -7   2 320.725 18.6142   2
  -7   7  -2 315.396 19.6502   1
   7   7   2 301.663 17.8664   2
   8  -7   2 4.15903 3.13315   2
  -8  -7  -2 -0.6814 1.64619   1
  -8   7  -2 8.23553 3.58197   1
   8   7   2 7.22504 3.85807   2
  -9  -7  -2 31.5969 3.90660   1
   9  -7   2 43.3034 7.59888   2
  -9  -7  -2 36.5185 4.47637   1
  -9   7  -2 45.1131 8.76545   1
   9   7   2 26.5402 6.84301   2
 -10  -7  -2 85.5290 6.16179   1
 -10  -7  -2 60.5110 5.87589   1
  10  -7   2 80.8442 11.2560   2
 -10   7  -2 75.7739 11.8653   1
  10   7   2 78.9147 10.4859   2
 -11  -7  -2 75.6909 6.29737   1
 -11  -7  -2 61.0755 6.82953   1
  11  -7   2 73.4425 10.9467   2
  11   7   2 67.7528 10.6024   2
 -11   7  -2 88.7594 12.8168   1
  12  -7   2 7.61451 5.05455   2
 -12  -7  -2 9.69173 3.63025   1
  12   7   2 1.82663 5.10288   2
 -12   7  -2 7.76499 6.27933   1
  13  -7   2 -0.8588 4.69606   2
 -13  -7  -2 -2.1993 3.88854   1
  13   7   2 4.81322 5.15143   2
 -13   7  -2 0.77715 7.44839   1
  14  -7   2 5.38429 6.85718   2
  14   7   2 36.0436 10.0802   2
 -14   7  -2 19.1294 8.57026   1
  15  -7   2 2.03874 7.13297   2
  15   7   2 0.39599 6.40098   2
  16   7   2 2.11315 7.98355   2
  17  -7   2 3.93523 10.0813   2
  17   7   2 3.70233 9.75627   2
  17  -8  -2 -12.028 8.29868   2
  16  -8  -2 11.5943 9.11640   2
  16   8  -2 -0.3752 7.07889   2
  15  -8  -2 14.3092 7.87832   2
 -15   8   2 -10.503 7.30162   1
  15   8  -2 2.61533 5.79652   2
  14  -8  -2 3.93121 5.80739   2
  14   8  -2 4.13209 5.75603   2
 -14   8   2 17.9073 8.65245   1
  13  -8  -2 31.1619 9.19396   2
 -13   8   2 19.5591 9.07301   1
  13   8  -2 37.9824 10.1374   2
  12  -8  -2 -1.8612 3.94846   2
 -12   8   2 -3.0959 5.51257   1
  12   8  -2 2.34983 4.31942   2
  11  -8  -2 191.057 16.5569   2
 -11   8   2 232.248 19.2866   1
  11   8  -2 218.916 17.4318   2
  10  -8  -2 0.42281 3.70875   2
  10   8  -2 1.24816 3.21305   2
 -10   8   2 0.96364 3.52916   1
   9  -8  -2 20.2861 5.32973   2
  -9   8   2 14.4364 6.03894   1
   9   8  -2 15.9756 4.56559   2
   8  -8  -2 142.288 11.9905   2
  -8   8   2 139.895 13.3627   1
   8   8  -2 125.939 11.4396   2
   7  -8  -2 -1.0967 1.63050   2
  -7   8   2 -1.6678 2.46744   1
   7   8  -2 -0.4506 1.85251   2
   6  -8  -2 7.72847 2.71684   2
  -6   8   2 5.52528 3.27472   1
   6   8  -2 8.60829 3.24877   2
   5  -8  -2 44.1947 5.42841   2
   5   8  -2 40.4903 5.49122   2
  -5   8   2 47.1204 6.83543   1
  -4   8   2 487.634 23.6511   1
   4   8  -2 468.393 21.7292   2
   3  -8  -2 18.9017 3.50699   2
   3   8  -2 21.9561 2.18538   1
   3   8  -2 21.9030 3.89432   2
  -3   8   2 15.8381 3.78418   1
   3   8  -2 23.4979 2.31119   1
   2  -8  -2 32.9060 3.98268   2
   2  -8  -2 32.9810 4.88197   1
  -2  -8   2 31.5042 3.97209   2
   2   8  -2 36.6219 3.32525   1
  -2   8   2 29.6406 4.02621   2
  -2   8   2 28.6327 4.39566   1
   2   8  -2 30.3281 3.29261   1
  -1  -8   2 926.465 35.5921   2
   1  -8  -2 943.862 35.1679   2
   1  -8  -2 936.132 35.7529   1
  -1   8   2 925.616 34.8715   2
   1   8  -2 928.128 34.4751   1
   1   8  -2 942.547 34.1691   1
  -1   8   2 899.968 35.4417   1
   0  -8  -2 1959.34 66.3152   1
   0  -8  -2 1935.85 64.8391   2
   0  -8   2 1813.13 64.7661   2
   0   8   2 1808.20 64.0449   2
   0   8   2 1870.24 63.9974   1
   0   8  -2 1786.16 64.7009   1
   0   8  -2 1794.60 64.3415   1
   0   8  -2 1702.77 64.0311   2
  -1  -8  -2 379.001 16.4498   2
   1  -8   2 335.372 16.1604   2
   1  -8   2 323.576 16.6209   1
  -1  -8  -2 346.400 14.9607   1
   1   8   2 355.511 16.1343   2
   1   8   2 369.995 14.9704   1
  -1   8  -2 335.006 16.3299   1
  -1   8  -2 330.021 15.8024   2
  -1   8  -2 343.049 17.0578   1
   2  -8   2 13.9529 3.52045   2
  -2  -8  -2 15.4819 2.61194   1
  -2   8  -2 18.9210 3.86708   1
   2   8   2 12.2768 2.09615   1
   2   8   2 14.9410 2.84487   2
  -3  -8  -2 1041.51 36.0097   1
   3  -8   2 1060.39 40.5012   2
  -3   8  -2 1075.27 43.0390   1
   3   8   2 1027.94 35.7043   1
  -4  -8  -2 987.741 31.3032   1
   4  -8   2 923.483 37.1706   2
   4   8   2 947.437 31.0431   1
  -4   8  -2 871.696 38.9861   1
   4   8   2 890.425 36.7417   2
   5  -8   2 3.30170 2.50890   2
  -5   8  -2 1.57397 2.77812   1
   5   8   2 -1.2274 1.24547   2
   6  -8   2 278.730 16.7250   2
  -6   8  -2 294.449 18.9700   1
   6   8   2 283.254 16.4224   2
   7  -8   2 130.594 11.6262   2
  -7   8  -2 156.706 13.6119   1
   7   8   2 156.623 12.0084   2
   8  -8   2 45.3493 7.46199   2
   8   8   2 71.7086 8.55460   2
  -8   8  -2 43.4691 9.28575   1
   9  -8   2 217.702 16.7297   2
   9   8   2 223.709 16.0867   2
  -9   8  -2 231.634 18.2323   1
  10  -8   2 404.209 26.7797   2
  10   8   2 408.994 26.4087   2
 -10   8  -2 406.587 26.8883   1
  11  -8   2 261.002 20.0148   2
  11   8   2 224.003 18.1634   2
 -11   8  -2 229.849 25.2996   1
  12  -8   2 122.662 14.9895   2
 -12   8  -2 105.323 15.0826   1
  12   8   2 142.206 14.7026   2
  13  -8   2 78.2759 13.4695   2
  13   8   2 61.6138 11.7168   2
 -13   8  -2 87.5013 15.2128   1
  14  -8   2 4.22824 7.28816   2
  14   8   2 1.85836 5.40426   2
 -14   8  -2 29.2418 10.0116   1
  15  -8   2 1.88411 7.67318   2
 -15   8  -2 -7.1149 9.32139   1
  15   8   2 7.01570 6.34063   2
  16  -8   2 64.9588 15.2305   2
  16   8   2 51.7249 14.1212   2
  17  -9  -2 36.9382 13.7135   2
 -17   9   2 39.7974 25.4137   1
  16  -9  -2 22.3734 11.3501   2
  16   9  -2 33.4819 11.1773   2
 -16   9   2 42.9799 17.5373   1
  15  -9  -2 27.6351 10.6691   2
  15   9  -2 41.6064 9.54323   2
 -15   9   2 34.7246 12.5921   1
  14  -9  -2 626.038 36.7942   2
 -14   9   2 582.218 36.6357   1
  14   9  -2 558.856 35.0163   2
  13  -9  -2 64.3577 12.0479   2
 -13   9   2 36.9481 10.1385   1
  13   9  -2 72.4879 12.5284   2
  12  -9  -2 55.9807 9.86386   2
 -12   9   2 49.3856 11.3844   1
  12   9  -2 61.8321 10.0372   2
  11  -9  -2 68.3214 9.60673   2
  11   9  -2 60.4761 9.84428   2
 -11   9   2 54.3584 15.5862   1
 -10   9   2 92.5976 12.3476   1
  10   9  -2 71.0731 9.92667   2
   9  -9  -2 -0.8816 3.20758   2
   9   9  -2 5.02399 3.39499   2
  -9   9   2 4.19438 4.79384   1
   8  -9  -2 266.153 17.3129   2
  -8   9   2 256.889 18.8059   1
   8   9  -2 299.101 17.8981   2
   7  -9  -2 33.5357 5.62868   2
   7   9  -2 25.5476 5.84844   2
  -7   9   2 17.5370 5.43740   1
   6  -9  -2 613.935 28.0436   2
  -6   9   2 623.141 30.4788   1
   5  -9  -2 268.568 15.1697   2
  -5   9   2 277.735 17.3001   1
   5   9  -2 274.102 15.6531   2
   4  -9  -2 2887.04 98.0450   2
   4   9  -2 2800.33 91.4238   1
   4   9  -2 2833.57 98.4517   2
  -4   9   2 2847.58 100.577   1
   4   9  -2 2689.22 91.2075   1
   3  -9  -2 1636.10 57.3285   2
   3   9  -2 1553.77 52.7668   1
   3   9  -2 1551.84 60.7451   2
   3   9  -2 1521.94 53.0604   1
   2  -9  -2 4064.53 134.044   2
  -2  -9   2 3894.51 134.335   2
   2   9  -2 3965.69 131.576   1
   2   9  -2 3934.00 131.133   1
  -2   9   2 3935.70 135.187   1
   1  -9  -2 40.1347 5.25414   1
   1  -9  -2 52.6873 5.36565   2
  -1  -9   2 52.4258 5.41754   2
  -1   9   2 43.8484 5.12232   1
   1   9  -2 52.2083 4.87327   1
   1   9  -2 46.3720 4.72160   1
   0  -9  -2 428.587 18.7257   1
   0  -9  -2 428.219 19.1172   2
   0  -9   2 398.745 19.0365   2
   0   9   2 429.502 18.5603   1
   0   9  -2 407.770 18.6752   1
   0   9  -2 423.961 19.3132   1
   1  -9   2 401.530 18.7534   2
  -1  -9  -2 422.086 17.5440   1
  -1  -9  -2 434.959 19.0170   2
   1  -9   2 374.076 19.0961   1
  -1   9  -2 382.018 18.7044   1
  -1   9  -2 406.183 19.5341   1
   1   9   2 420.351 17.2640   1
  -2  -9  -2 436.593 17.1836   1
   2  -9   2 396.305 19.3121   2
   2   9   2 415.471 19.5050   2
   2   9   2 430.242 16.7879   1
  -2   9  -2 413.293 20.8311   1
   3  -9   2 181.447 11.2387   2
  -3  -9  -2 174.340 8.08054   1
  -3   9  -2 180.954 12.7962   1
   3   9   2 174.752 7.87306   1
  -4  -9  -2 1056.92 35.3174   1
   4  -9   2 1008.44 41.5243   2
  -4   9  -2 1034.31 44.2020   1
   4   9   2 1085.49 35.2172   1
   4   9   2 1082.68 41.8666   2
   5  -9   2 162.683 11.6059   2
  -5   9  -2 154.201 12.8459   1
   5   9   2 151.350 10.9891   2
   6  -9   2 137.524 11.2556   2
   6   9   2 161.300 11.7436   2
  -6   9  -2 154.331 13.4599   1
   7  -9   2 644.772 30.3589   2
  -7   9  -2 621.382 32.6493   1
   8  -9   2 22.1256 6.34778   2
   8   9   2 26.9654 6.68003   2
  -8   9  -2 16.3298 4.98561   1
   9  -9   2 358.755 22.1435   2
  -9   9  -2 348.707 23.8440   1
   9   9   2 338.845 21.4615   2
  10  -9   2 17.3569 5.99046   2
  10   9   2 25.2576 6.50349   2
 -10   9  -2 27.2530 9.31441   1
  11  -9   2 9.37185 5.95964   2
  11   9   2 1.25077 3.87873   2
 -11   9  -2 -1.5178 6.00042   1
  12  -9   2 132.638 15.1213   2
  12   9   2 117.282 13.8207   2
 -12   9  -2 112.754 15.0281   1
  13  -9   2 25.5025 8.08093   2
 -13   9  -2 37.0185 9.84069   1
  13   9   2 7.10717 6.43285   2
  14  -9   2 -6.5048 5.62673   2
  14   9   2 -6.6559 4.98556   2
 -14   9  -2 -1.1756 8.30080   1
  15  -9   2 66.1469 15.7663   2
  15   9   2 110.203 16.8158   2
 -15   9  -2 109.231 20.7272   1
  16  -9   2 8.63498 8.89776   2
  16   9   2 1.73258 8.10529   2
  17 -10  -2 -4.2659 9.28452   2
  16 -10  -2 -1.3039 6.65651   2
 -16  10   2 11.1354 11.6313   1
  16  10  -2 -2.5779 7.66140   2
  15 -10  -2 -6.3412 7.71315   2
  15  10  -2 1.09097 5.73555   2
 -15  10   2 21.4787 10.1547   1
  14 -10  -2 -2.1230 6.47757   2
 -14  10   2 2.18989 7.77826   1
  14  10  -2 2.82391 5.00917   2
  13 -10  -2 308.497 23.3632   2
 -13  10   2 270.295 24.0239   1
  13  10  -2 269.472 22.5753   2
  12 -10  -2 10.2105 5.39169   2
  12  10  -2 20.9259 8.00603   2
 -12  10   2 11.9824 7.98547   1
  11 -10  -2 -1.3484 3.97335   2
  11  10  -2 2.00957 3.34031   2
 -11  10   2 2.99661 5.30797   1
 -10  10   2 18.4424 7.62560   1
  10  10  -2 9.33968 4.24367   2
   9 -10  -2 46.8335 7.83389   2
   9  10  -2 54.6037 8.48034   2
  -9  10   2 48.9395 10.0551   1
   8 -10  -2 -2.0407 2.55758   2
  -8  10   2 -2.7629 2.90462   1
   8  10  -2 -0.2252 2.47581   2
   7 -10  -2 224.755 15.1635   2
   7  10  -2 218.969 15.1412   2
  -7  10   2 217.289 16.4592   1
   6 -10  -2 46.5203 6.23010   2
   6  10  -2 44.8914 6.37720   2
  -6  10   2 46.1781 7.82898   1
   5 -10  -2 180.407 12.0310   2
   5  10  -2 171.059 12.0770   2
  -5  10   2 175.062 13.7073   1
   4 -10  -2 485.148 22.6618   2
   4  10  -2 482.140 17.1036   1
   4  10  -2 508.487 23.4911   2
   4  10  -2 480.041 17.2786   1
  -4  10   2 493.671 24.8148   1
   3 -10  -2 856.269 34.3738   2
  -3  10   2 873.161 36.2952   1
   3  10  -2 836.477 30.1964   1
   3  10  -2 836.246 30.5330   1
  -2 -10   2 77.6817 6.87807   2
   2 -10  -2 80.6656 7.23266   2
   2  10  -2 82.6178 5.85313   1
  -2  10   2 65.8159 6.91279   1
   2  10  -2 72.8250 5.55114   1
  -1 -10   2 2361.98 85.6061   2
   1 -10  -2 2508.12 84.9003   2
   1  10  -2 2441.30 83.2790   1
  -1  10   2 2367.92 84.8327   1
   1  10  -2 2392.59 83.5867   1
   0 -10   2 8.77515 2.69133   2
   0 -10  -2 9.29815 3.09694   1
   0 -10  -2 12.1684 3.17019   2
   0  10  -2 5.44106 2.48091   1
   0  10  -2 5.17488 2.36250   1
   0  10   2 8.31971 2.59881   1
  -1 -10  -2 59.1542 5.98146   2
  -1 -10  -2 70.8530 6.59249   1
  -1  10  -2 70.9363 6.89667   1
   1  10   2 56.2013 5.12397   1
  -2 -10  -2 262.429 11.9927   1
   2 -10   2 240.509 13.8769   2
   2  10   2 249.062 14.0189   2
   2  10   2 245.840 11.4138   1
  -3 -10  -2 650.778 24.3589   1
   3 -10   2 649.223 28.5561   2
  -3  10  -2 649.774 30.5088   1
   3  10   2 683.407 24.1244   1
  -4 -10  -2 370.765 13.4614   1
   4 -10   2 356.457 18.9390   2
   4  10   2 373.068 13.2475   1
   4  10   2 318.979 18.1904   2
  -4  10  -2 390.960 21.5826   1
   5 -10   2 254.808 15.8481   2
   5  10   2 268.691 15.7839   2
  -5  10  -2 260.419 17.7698   1
   6 -10   2 513.595 25.9482   2
   6  10   2 520.039 25.7660   2
  -6  10  -2 540.495 28.8145   1
   7 -10   2 5.22749 2.75660   2
   7  10   2 9.58850 3.53996   2
  -7  10  -2 7.28614 4.20378   1
   8 -10   2 242.843 16.8309   2
   8  10   2 232.449 16.3244   2
  -8  10  -2 202.042 17.7998   1
   9 -10   2 27.7760 6.94623   2
  -9  10  -2 34.4806 9.16668   1
   9  10   2 44.8535 7.79954   2
  10 -10   2 114.984 13.0332   2
  10  10   2 139.433 13.7044   2
 -10  10  -2 148.486 20.3459   1
  11 -10   2 21.1043 7.97471   2
  11  10   2 14.4396 5.43310   2
 -11  10  -2 6.36265 5.52601   1
  12 -10   2 -5.9137 4.39119   2
  12  10   2 0.99819 4.33391   2
 -12  10  -2 -6.7134 5.70939   1
  13 -10   2 11.4565 6.80388   2
  13  10   2 10.1125 6.23132   2
 -13  10  -2 21.2946 9.86430   1
  14 -10   2 17.6605 7.56003   2
  14  10   2 7.85828 7.34286   2
 -14  10  -2 21.4286 10.0466   1
  15 -10   2 4.38131 6.98485   2
  15  10   2 10.6593 6.97772   2
 -15  10  -2 10.7948 10.6289   1
  16 -10   2 -3.1456 8.37982   2
  16  10   2 5.98582 7.75192   2
  16 -11  -2 4.49612 8.73904   2
 -16  11   2 -6.2185 11.7467   1
  16  11  -2 4.47739 8.14782   2
  15 -11  -2 96.2322 16.2916   2
  15  11  -2 95.4643 15.2583   2
 -15  11   2 110.192 18.6192   1
  14 -11  -2 0.73669 6.79935   2
  14  11  -2 8.41688 8.16753   2
 -14  11   2 16.7279 8.41396   1
  13 -11  -2 66.2809 12.5893   2
  13  11  -2 13.4234 6.60895   2
 -13  11   2 26.7478 9.38275   1
  12 -11  -2 6.47306 5.44643   2
  12  11  -2 4.98218 5.22219   2
 -12  11   2 1.31783 5.38141   1
  11 -11  -2 13.8407 5.11304   2
  11  11  -2 5.88763 5.07315   2
 -11  11   2 12.4532 6.52364   1
  10 -11  -2 160.684 14.0668   2
  10  11  -2 140.602 13.5768   2
   9 -11  -2 13.1329 4.93262   2
  -9  11   2 12.7760 6.81623   1
   9  11  -2 17.5034 6.56489   2
   8 -11  -2 396.074 22.2936   2
  -8  11   2 385.474 24.5142   1
   8  11  -2 347.454 21.4923   2
   7 -11  -2 -0.6187 2.81366   2
  -7  11   2 0.99623 3.50444   1
   7  11  -2 2.69873 2.70015   2
   6 -11  -2 156.680 11.9039   2
   6  11  -2 134.687 11.3097   2
  -6  11   2 143.953 13.1416   1
   5 -11  -2 557.654 26.8212   2
   5  11  -2 573.427 27.3932   2
  -5  11   2 619.011 29.9961   1
   4 -11  -2 11.3870 3.28556   2
   4  11  -2 8.35652 1.72116   1
   4  11  -2 9.73092 3.47416   2
  -4  11   2 6.98222 3.88215   1
   4  11  -2 11.6733 1.86531   1
   3 -11  -2 220.213 13.1117   2
   3  11  -2 206.791 10.1798   1
   3  11  -2 210.268 13.3488   2
  -3  11   2 221.511 14.2564   1
   3  11  -2 215.543 10.0188   1
  -2 -11   2 77.2372 7.26882   2
   2 -11  -2 68.4082 6.74268   2
  -2  11   2 67.0591 6.91495   1
   2  11  -2 67.3025 6.13167   1
   2  11  -2 66.4143 5.57272   1
   1 -11  -2 13.9370 3.32110   2
  -1 -11   2 17.1222 4.33539   2
  -1  11   2 13.0313 3.57016   1
   1  11  -2 12.7394 3.41126   1
   1  11  -2 13.2558 3.31173   1
   0 -11  -2 78.2626 7.29076   1
   0 -11  -2 80.3816 7.41214   2
   0 -11   2 96.7067 8.20214   2
   0  11   2 84.4997 7.27424   1
   0  11  -2 95.3909 7.77614   1
   1 -11   2 28.7931 4.73270   2
  -1 -11  -2 22.1589 4.13795   1
  -1 -11  -2 28.6204 4.41740   2
   1  11   2 24.2247 3.75742   1
  -1  11  -2 23.6412 5.16400   1
   2 -11   2 37.8146 5.35122   2
  -2 -11  -2 17.5507 3.81781   1
  -2  11  -2 26.7402 6.07690   1
   2  11   2 23.9004 3.32052   1
   2  11   2 36.3619 4.93040   2
  -3 -11  -2 1.58834 1.66947   1
   3 -11   2 2.45484 2.12743   2
   3  11   2 2.59520 1.58931   1
  -3  11  -2 -2.6481 1.84142   1
   3  11   2 -0.4955 1.34407   2
  -4 -11  -2 122.436 5.81409   1
   4 -11   2 120.149 10.0252   2
   4  11   2 122.629 5.63371   1
   4  11   2 130.750 10.1627   2
  -4  11  -2 97.8396 10.8441   1
   5 -11   2 1155.84 47.4018   2
  -5  11  -2 1183.13 50.6209   1
   5  11   2 1182.73 47.4310   2
   6 -11   2 226.157 15.5977   2
   6  11   2 218.219 15.0051   2
  -6  11  -2 234.085 17.7725   1
   7 -11   2 434.728 24.1483   2
   7  11   2 404.279 23.3233   2
  -7  11  -2 476.477 27.1168   1
   8 -11   2 21.5565 6.28992   2
   8  11   2 25.6356 6.60991   2
  -8  11  -2 8.45148 5.62736   1
   9 -11   2 327.884 25.2366   2
   9  11   2 284.822 22.3615   2
  -9  11  -2 318.623 23.5304   1
  10 -11   2 372.174 24.6481   2
 -10  11  -2 418.049 28.0465   1
  10  11   2 355.669 23.4994   2
  11 -11   2 5.18126 5.43700   2
 -11  11  -2 4.12378 5.54977   1
  11  11   2 2.01627 3.99876   2
  12 -11   2 4.62186 5.78804   2
  12  11   2 1.58866 5.14901   2
 -12  11  -2 3.47997 6.50069   1
  13 -11   2 -9.1785 5.30584   2
 -13  11  -2 -8.7747 7.03919   1
  13  11   2 2.83599 5.93307   2
  14 -11   2 24.9464 10.6965   2
 -14  11  -2 40.4009 12.3420   1
  14  11   2 33.0788 10.8712   2
  15 -11   2 7.17031 9.24455   2
  15  11   2 -3.0695 7.44457   2
 -15  11  -2 3.43962 9.95179   1
  16 -11   2 41.4076 13.0769   2
  16  11   2 41.5485 13.7682   2
  16 -12  -2 40.8279 13.7269   2
 -16  12   2 10.9371 11.0846   1
  16  12  -2 11.4000 9.12565   2
  15 -12  -2 99.3465 16.8541   2
  15  12  -2 74.2888 14.9855   2
 -15  12   2 97.1808 18.9880   1
  14 -12  -2 12.6569 9.13128   2
  14  12  -2 4.91576 6.15237   2
 -14  12   2 8.83540 8.90100   1
  13 -12  -2 167.483 18.6903   2
 -13  12   2 168.214 20.3690   1
  13  12  -2 167.197 18.1233   2
  12 -12  -2 170.802 17.0513   2
  12  12  -2 123.529 14.6176   2
 -12  12   2 172.144 18.5885   1
  11 -12  -2 263.833 20.1525   2
 -11  12   2 293.397 23.0018   1
  11  12  -2 200.289 18.1956   2
  10 -12  -2 141.706 13.8254   2
  10  12  -2 121.342 12.4208   2
 -10  12   2 128.149 16.1377   1
   9 -12  -2 4.11433 3.50631   2
   9  12  -2 -0.2769 2.64384   2
  -9  12   2 0.04451 3.87923   1
   8 -12  -2 6.52294 4.24128   2
   8  12  -2 10.0592 5.00668   2
  -8  12   2 10.5866 5.16294   1
   7 -12  -2 94.9943 9.96786   2
  -7  12   2 121.779 12.8880   1
   7  12  -2 92.8168 10.1163   2
   6 -12  -2 60.7918 7.88695   2
   6  12  -2 60.4710 7.94134   2
  -6  12   2 51.7584 9.16180   1
   5 -12  -2 666.990 30.2006   2
  -5  12   2 636.100 32.4030   1
   5  12  -2 674.374 30.8398   2
   4 -12  -2 10.1607 3.60992   2
  -4  12   2 8.90929 3.63065   1
   4  12  -2 20.9247 5.52565   2
   4  12  -2 6.45802 1.73108   1
   4  12  -2 15.1043 2.40321   1
   3 -12  -2 440.222 21.8954   2
   3  12  -2 451.415 18.3379   1
   3  12  -2 460.110 18.7218   1
   3  12  -2 467.989 22.8558   2
  -3  12   2 434.784 23.3133   1
  -2 -12   2 426.664 20.7999   2
   2 -12  -2 392.038 19.9469   2
   2  12  -2 379.553 17.9020   1
   2  12  -2 410.619 17.8202   1
  -2  12   2 400.526 20.8353   1
  -1 -12   2 1262.60 49.9542   2
   1 -12  -2 1345.76 49.9070   2
   1  12  -2 1293.78 48.3711   1
   1  12  -2 1251.48 47.7255   1
   0 -12  -2 799.043 33.3580   2
   0 -12   2 765.428 33.5626   2
   0  12   2 788.598 32.4304   1
   0  12  -2 826.025 33.6122   1
  -1 -12  -2 427.889 20.1044   1
  -1 -12  -2 475.339 22.0876   2
   1 -12   2 431.681 21.7598   2
   1  12   2 466.276 20.1193   1
  -1  12  -2 444.547 22.5000   1
  -2 -12  -2 93.6079 7.03947   1
   2 -12   2 102.674 8.92505   2
   2  12   2 85.6605 7.89854   2
   2  12   2 99.3183 6.86523   1
  -2  12  -2 87.2489 8.78857   1
   3 -12   2 78.5012 8.09143   2
  -3 -12  -2 79.6318 6.04284   1
   3  12   2 91.6612 8.39178   2
   3  12   2 83.6778 5.62428   1
  -3  12  -2 80.6427 9.29965   1
   4 -12   2 26.8670 5.80111   2
  -4 -12  -2 30.9624 3.15215   1
  -4  12  -2 33.3501 7.76547   1
   4  12   2 27.3265 2.78067   1
   4  12   2 25.5165 4.82151   2
   5 -12   2 227.785 15.5772   2
   5  12   2 244.236 15.7441   2
  -5  12  -2 235.933 17.8095   1
   6 -12   2 1356.32 54.8729   2
   6  12   2 1358.93 54.8078   2
  -6  12  -2 1337.56 58.1798   1
   7 -12   2 402.094 23.4653   2
   7  12   2 414.362 23.5878   2
  -7  12  -2 408.759 26.5205   1
   8 -12   2 19.8025 6.16340   2
  -8  12  -2 25.9656 7.39236   1
   8  12   2 20.3079 5.70587   2
   9 -12   2 247.847 19.3509   2
   9  12   2 256.118 18.5562   2
  10 -12   2 3.84173 3.90378   2
  10  12   2 7.02095 3.94978   2
 -10  12  -2 -3.8000 5.22133   1
  11 -12   2 -2.0810 5.18380   2
 -11  12  -2 3.65954 5.57747   1
  11  12   2 -0.1933 4.17316   2
  12 -12   2 5.50630 4.90695   2
 -12  12  -2 -8.9437 5.59116   1
  12  12   2 3.31811 5.69810   2
  13 -12   2 1.40833 6.60124   2
 -13  12  -2 2.46806 8.91581   1
  13  12   2 13.7876 8.45128   2
  14 -12   2 63.3543 19.1868   2
 -14  12  -2 112.984 19.5936   1
  14  12   2 69.8081 18.1967   2
  15 -12   2 15.9032 8.57459   2
  15  12   2 18.9223 9.02932   2
  16 -12   2 4.88157 9.34691   2
 -16  12  -2 -12.879 13.2970   1
  16  12   2 18.0292 9.89210   2
  16 -13  -2 12.2398 11.4824   2
  16  13  -2 10.6961 9.80289   2
 -16  13   2 -6.7718 14.2287   1
  15 -13  -2 77.8683 16.6350   2
  15  13  -2 83.9665 16.0420   2
  14 -13  -2 194.056 21.2808   2
 -14  13   2 181.639 22.2788   1
  14  13  -2 172.882 19.3438   2
  13 -13  -2 547.728 34.4109   2
 -13  13   2 502.641 35.3902   1
  13  13  -2 566.060 33.8703   2
  12 -13  -2 21.4512 7.36399   2
  12  13  -2 26.2315 8.17863   2
 -12  13   2 23.9799 10.3043   1
  11 -13  -2 179.686 16.6151   2
  11  13  -2 194.581 17.5018   2
 -11  13   2 232.282 21.9749   1
  10 -13  -2 152.917 14.6416   2
 -10  13   2 133.943 16.7818   1
  10  13  -2 135.959 14.0997   2
   9  13  -2 234.213 17.7471   2
  -9  13   2 255.939 27.3853   1
   8 -13  -2 119.842 11.3893   2
   8  13  -2 108.799 11.7452   2
  -8  13   2 125.185 14.4725   1
   7 -13  -2 217.184 15.3505   2
  -7  13   2 187.169 16.5384   1
   7  13  -2 203.895 15.3599   2
   6 -13  -2 13.7248 4.75321   2
   6  13  -2 7.03494 3.52232   2
  -6  13   2 22.8395 6.01851   1
   5 -13  -2 185.113 13.5498   2
  -5  13   2 207.881 16.1036   1
   5  13  -2 181.280 13.6942   2
   4 -13  -2 31.1846 5.31663   2
   4  13  -2 31.4122 5.79059   2
   4  13  -2 44.8396 3.67660   1
   4  13  -2 34.4955 3.61629   1
  -4  13   2 33.4344 7.54833   1
   3 -13  -2 504.466 23.3334   2
   3  13  -2 430.176 18.9500   1
   3  13  -2 445.255 23.1177   2
   3  13  -2 435.864 19.0031   1
  -3  13   2 478.798 24.4024   1
  -2 -13   2 437.020 22.3374   2
   2 -13  -2 436.984 21.8219   2
   2  13  -2 438.310 19.8485   1
  -2  13   2 443.360 22.7071   1
   2  13  -2 432.621 19.4395   1
   1 -13  -2 3713.99 130.995   2
  -1 -13   2 3816.96 131.904   2
  -1  13   2 3836.13 131.288   1
   1  13  -2 3774.16 129.751   1
   0 -13   2 593.019 28.9377   2
   0 -13  -2 691.532 29.6521   2
   0  13  -2 641.356 31.4242   1
   0  13   2 676.748 28.4807   1
  -1 -13  -2 104.695 9.56175   1
   1 -13   2 101.390 8.77437   2
  -1 -13  -2 84.8032 8.26015   2
   1  13   2 89.8754 7.20401   1
  -1  13  -2 98.2201 9.24644   1
  -2 -13  -2 1.78226 2.40595   1
   2 -13   2 2.62422 2.57573   2
  -2  13  -2 8.21344 4.06788   1
   2  13   2 1.92545 1.88972   2
   2  13   2 5.28616 2.06874   1
   3 -13   2 224.016 15.0671   2
  -3 -13  -2 221.966 11.5720   1
   3  13   2 259.271 15.5695   2
  -3  13  -2 204.847 15.8557   1
   3  13   2 236.628 11.3419   1
   4 -13   2 659.192 30.9796   2
   4  13   2 653.829 24.0759   1
  -4  13  -2 623.456 32.8543   1
   4  13   2 704.793 31.3665   2
   5 -13   2 858.394 38.1117   2
   5  13   2 851.381 38.0157   2
  -5  13  -2 849.445 41.1430   1
   6 -13   2 17.1495 5.75637   2
   6  13   2 18.7490 5.85111   2
  -6  13  -2 22.1283 7.73076   1
   7 -13   2 364.396 22.3899   2
   7  13   2 358.256 22.0801   2
  -7  13  -2 384.770 25.4901   1
   8 -13   2 13.5316 5.45677   2
  -8  13  -2 12.0695 5.83170   1
   8  13   2 30.5666 7.41005   2
   9 -13   2 352.411 23.5295   2
   9  13   2 370.494 23.4009   2
  -9  13  -2 355.046 26.1160   1
  10 -13   2 1.84041 4.72704   2
  10  13   2 7.31636 5.57443   2
 -10  13  -2 -1.3541 5.19236   1
  11 -13   2 109.911 14.8722   2
  11  13   2 114.949 14.1085   2
 -11  13  -2 130.654 17.0546   1
  12 -13   2 23.1378 8.76253   2
 -12  13  -2 1.61532 6.48136   1
  12  13   2 13.1831 7.09500   2
  13 -13   2 239.492 23.1399   2
  13  13   2 242.894 21.6763   2
 -13  13  -2 238.583 25.2701   1
  14 -13   2 -0.7872 7.43139   2
 -14  13  -2 5.86752 8.55641   1
  14  13   2 -4.5467 6.54457   2
  15 -13   2 114.878 19.6129   2
 -15  13  -2 117.650 23.5565   1
  15  13   2 89.1026 17.3780   2
  16 -13   2 -13.505 9.03916   2
  16 -14  -2 13.1265 10.0739   2
  16  14  -2 -0.4036 8.15915   2
 -16  14   2 -15.129 9.59032   1
  15 -14  -2 7.70990 8.96294   2
  15  14  -2 4.08544 8.83434   2
  14 -14  -2 15.9427 15.4382   2
  14  14  -2 13.9469 10.0917   2
 -14  14   2 30.5517 12.8468   1
  13 -14  -2 -2.4189 6.03832   2
 -13  14   2 13.8108 8.59033   1
  13  14  -2 0.46470 5.27835   2
  12 -14  -2 47.6577 12.6483   2
  12  14  -2 56.0270 10.6360   2
 -12  14   2 41.3296 11.3131   1
  11 -14  -2 12.8851 6.87138   2
 -11  14   2 21.6632 8.73502   1
  11  14  -2 17.6937 8.16289   2
  10 -14  -2 223.708 17.5393   2
  10  14  -2 218.259 18.0122   2
 -10  14   2 169.653 18.4695   1
   9 -14  -2 266.499 19.4636   2
   9  14  -2 276.993 20.0560   2
  -9  14   2 265.593 21.9866   1
   8 -14  -2 138.805 13.1167   2
  -8  14   2 126.909 14.8340   1
   8  14  -2 111.111 12.0597   2
   7 -14  -2 213.676 16.1939   2
   7  14  -2 224.322 16.7180   2
  -7  14   2 256.671 19.8567   1
   6 -14  -2 202.753 15.0206   2
   6  14  -2 205.738 15.3811   2
  -6  14   2 190.130 17.0845   1
   5 -14  -2 86.6729 9.70483   2
   5  14  -2 85.0834 3.67824   1
  -5  14   2 99.6000 12.0303   1
   5  14  -2 93.1141 9.91881   2
   4 -14  -2 3.24413 2.71411   2
   4  14  -2 8.06803 3.93439   2
   4  14  -2 1.71746 1.76342   1
  -4  14   2 3.97018 3.42138   1
   4  14  -2 0.82724 1.77221   1
   3 -14  -2 583.039 27.0170   2
  -3  14   2 543.802 28.0207   1
   3  14  -2 560.303 23.1788   1
   3  14  -2 537.013 27.1746   2
   2 -14  -2 456.522 23.3381   2
  -2 -14   2 490.449 24.1119   2
  -2  14   2 469.934 24.2807   1
   2  14  -2 468.267 20.7877   1
   2  14  -2 447.883 20.9484   1
  -1 -14   2 172.671 12.6950   2
   1 -14  -2 179.158 13.0716   2
  -1  14   2 192.628 13.0149   1
   1  14  -2 174.956 11.8630   1
   0 -14   2 1303.61 49.9058   2
   0 -14  -2 1207.59 48.7470   2
   0  14   2 1205.94 47.7545   1
   0  14  -2 1164.49 48.1739   1
  -1 -14  -2 0.35077 2.01486   2
   1 -14   2 -1.1926 1.74250   2
  -1  14  -2 -0.3457 2.51093   1
   1  14   2 -0.5589 1.48248   1
  -2 -14  -2 178.297 11.4729   1
   2 -14   2 201.888 13.9298   2
   2  14   2 192.592 11.0521   1
  -2  14  -2 197.347 14.7930   1
  -3 -14  -2 97.4619 7.52205   1
   3 -14   2 102.063 10.0416   2
   3  14   2 97.1476 9.61555   2
  -3  14  -2 96.0412 10.7995   1
   3  14   2 101.504 6.91996   1
   4 -14   2 75.7750 8.97285   2
   4  14   2 70.3703 8.41133   2
  -4  14  -2 67.9417 9.67985   1
   4  14   2 67.1774 4.92880   1
   5 -14   2 52.9214 7.72967   2
   5  14   2 54.9410 7.75270   2
  -5  14  -2 58.5767 9.77859   1
  -6  14  -2 390.942 25.6350   1
   6  14   2 368.337 22.2946   2
   7 -14   2 156.425 13.6643   2
   7  14   2 127.242 12.6375   2
  -7  14  -2 114.671 14.6937   1
   8 -14   2 67.3261 10.6332   2
   8  14   2 80.3955 11.1938   2
  -8  14  -2 78.8771 16.0557   1
   9 -14   2 2.05781 5.08220   2
   9  14   2 3.49529 4.17179   2
  -9  14  -2 10.1018 5.69632   1
  10 -14   2 55.3638 11.2964   2
 -10  14  -2 63.8128 13.7654   1
  10  14   2 64.8771 10.4898   2
  11 -14   2 37.5369 9.78364   2
 -11  14  -2 29.9559 10.0779   1
  11  14   2 21.7134 8.66699   2
  12 -14   2 27.4165 9.82665   2
 -12  14  -2 25.7205 10.8332   1
  12  14   2 25.3207 8.22978   2
  13 -14   2 15.0806 8.33028   2
  13  14   2 12.0404 7.23787   2
 -13  14  -2 0.00323 8.19538   1
  14 -14   2 85.9145 18.5358   2
 -14  14  -2 128.790 24.2559   1
  14  14   2 104.154 19.3234   2
  15 -14   2 -0.2077 9.45185   2
  15  14   2 3.10118 8.50190   2
 -15  14  -2 10.8366 12.4605   1
  15 -15  -2 94.2777 18.1027   2
 -15  15   2 70.6346 17.1189   1
  15  15  -2 100.389 17.1156   2
  14 -15  -2 63.8167 12.0255   2
  14  15  -2 89.1548 15.8819   2
 -14  15   2 50.2746 16.5102   1
  13 -15  -2 17.4251 9.62558   2
 -13  15   2 24.5927 11.0310   1
  13  15  -2 25.7769 9.86121   2
  12 -15  -2 3.70336 5.94852   2
  12  15  -2 4.94383 5.26930   2
 -12  15   2 0.70620 7.02176   1
  11 -15  -2 316.012 23.5226   2
 -11  15   2 329.092 27.0884   1
  11  15  -2 300.743 23.3582   2
  10 -15  -2 148.268 15.5030   2
 -10  15   2 137.515 16.5028   1
  10  15  -2 117.319 13.9863   2
   9 -15  -2 73.7379 10.2694   2
  -9  15   2 88.6863 13.5674   1
   9  15  -2 52.6080 9.90209   2
  -8  15   2 167.785 17.9270   1
   8  15  -2 205.538 16.3023   2
   7 -15  -2 2.59442 2.69926   2
   7  15  -2 0.42908 2.50948   2
  -7  15   2 -2.7998 3.81083   1
   6 -15  -2 14.7549 5.29679   2
   6  15  -2 13.7872 5.53708   2
  -6  15   2 19.6786 6.44043   1
   5 -15  -2 438.027 23.0147   2
   5  15  -2 403.127 22.9781   2
   5  15  -2 398.494 14.5039   1
  -5  15   2 383.001 24.5264   1
   5  15  -2 375.298 14.2637   1
   4 -15  -2 8.26210 4.34330   2
   4  15  -2 4.95562 2.32817   1
   4  15  -2 5.67405 3.95950   2
  -4  15   2 7.62530 3.83705   1
   4  15  -2 4.43672 2.36649   1
   3 -15  -2 244.461 15.8183   2
   3  15  -2 249.215 16.3653   2
   3  15  -2 223.146 12.1910   1
   3  15  -2 230.993 12.5339   1
  -3  15   2 206.585 15.6792   1
  -2 -15   2 6.42873 3.02073   2
   2 -15  -2 3.11701 2.54612   2
  -2  15   2 -0.3400 2.62725   1
   2  15  -2 3.34978 2.37195   1
  -1 -15   2 417.593 22.6973   2
   1 -15  -2 429.612 22.6677   2
  -1  15   2 420.133 22.0634   1
   1  15  -2 397.575 23.2129   1
   0 -15   2 67.0442 8.26166   2
   0 -15  -2 69.8000 8.38908   2
   0  15   2 55.8540 6.99630   1
   0  15  -2 67.4974 7.63246   1
  -1 -15  -2 1004.81 41.7371   2
   1 -15   2 996.528 42.2571   2
   1  15   2 965.491 39.6823   1
  -1  15  -2 940.163 41.7478   1
   2 -15   2 18.4987 4.70776   2
   2  15   2 20.0714 4.01924   1
   2  15   2 28.2394 5.71957   2
  -2  15  -2 19.6193 6.19983   1
   3 -15   2 0.46229 2.46069   2
   3  15   2 0.59169 2.00708   1
   3  15   2 -0.0251 2.01639   2
  -3  15  -2 3.17658 2.46110   1
   4 -15   2 102.352 10.1960   2
   4  15   2 105.884 6.51463   1
   4  15   2 109.844 6.92271   1
  -4  15  -2 104.871 12.5552   1
   4  15   2 119.477 11.1692   2
   5 -15   2 15.7644 5.42209   2
   5  15   2 17.8711 5.18597   2
   5  15   2 13.1883 1.77115   1
  -5  15  -2 16.5250 6.97565   1
   5  15   2 13.2216 2.61813   1
   6 -15   2 8.41589 4.35003   2
   6  15   2 6.75742 4.47179   2
  -6  15  -2 2.47572 4.45366   1
   7 -15   2 73.2440 10.1772   2
   7  15   2 77.7438 9.62917   2
  -7  15  -2 75.8669 13.1316   1
   8 -15   2 9.36771 6.31448   2
  -8  15  -2 0.92883 3.99349   1
   8  15   2 3.57840 4.08797   2
   9 -15   2 30.0015 8.87649   2
  -9  15  -2 30.0358 9.66228   1
   9  15   2 22.7267 6.31650   2
  10 -15   2 6.26906 6.10847   2
 -10  15  -2 2.10464 6.84446   1
  10  15   2 -1.3308 3.98474   2
  11 -15   2 85.6490 13.8888   2
 -11  15  -2 58.7404 14.4821   1
  11  15   2 38.4781 8.58123   2
  12 -15   2 18.1603 8.62928   2
  12  15   2 7.40971 8.03215   2
 -12  15  -2 5.40032 7.92962   1
  13 -15   2 13.5860 9.14400   2
  13  15   2 15.1110 6.86137   2
 -13  15  -2 -8.8044 7.77651   1
  14 -15   2 121.622 19.0378   2
  14  15   2 86.9161 17.0234   2
 -14  15  -2 105.129 21.3098   1
  15 -15   2 14.7333 10.9345   2
  15  15   2 15.7686 11.2848   2
 -15  15  -2 16.2776 12.4822   1
  15 -16  -2 30.3151 12.3445   2
 -15  16   2 57.2608 15.4603   1
  15  16  -2 44.2573 12.6249   2
  14 -16  -2 -3.1863 7.93572   2
  14  16  -2 -8.1872 5.55960   2
 -14  16   2 -1.7326 8.82643   1
  13 -16  -2 3.93938 7.74305   2
 -13  16   2 11.9982 9.83043   1
  13  16  -2 1.56182 7.19784   2
  12 -16  -2 89.5570 15.9137   2
 -12  16   2 94.8515 18.3200   1
  12  16  -2 114.476 15.5524   2
  11 -16  -2 86.7741 14.5553   2
 -11  16   2 106.587 18.1051   1
  11  16  -2 114.499 14.7314   2
  10 -16  -2 36.0706 9.77781   2
 -10  16   2 30.6150 10.6598   1
  10  16  -2 41.2936 10.3204   2
   9 -16  -2 12.2329 5.32341   2
  -9  16   2 11.2340 6.77599   1
   9  16  -2 21.1354 7.38971   2
   8 -16  -2 53.5254 9.57246   2
  -8  16   2 52.5841 11.1212   1
   8  16  -2 55.9668 9.80750   2
   7 -16  -2 41.6334 8.07759   2
   7  16  -2 44.1251 8.72977   2
  -7  16   2 48.8904 13.1211   1
   6 -16  -2 5.86197 3.88633   2
  -6  16   2 5.06001 4.72463   1
   6  16  -2 3.52071 3.26227   2
   5 -16  -2 3.52670 3.54100   2
   5  16  -2 1.61786 1.64633   1
   5  16  -2 3.09089 3.13804   2
   5  16  -2 -1.1748 1.45325   1
  -5  16   2 -1.4151 3.31938   1
   4 -16  -2 143.369 12.7012   2
   4  16  -2 159.979 13.5900   2
  -4  16   2 172.798 14.8334   1
   3 -16  -2 889.578 37.9826   2
  -3  16   2 823.817 38.5109   1
   3  16  -2 783.433 32.1141   1
   3  16  -2 811.990 32.7969   1
   3  16  -2 816.270 37.9121   2
   2 -16  -2 1193.79 49.3905   2
  -2 -16   2 1261.75 50.1174   2
   2  16  -2 1140.33 45.7823   1
  -2  16   2 1142.03 49.6785   1
  -1 -16   2 221.626 15.8242   2
   1 -16  -2 225.862 15.6046   2
   1  16  -2 205.919 13.9240   1
  -1  16   2 225.252 15.2030   1
   0 -16   2 403.682 23.8012   2
   0 -16  -2 481.747 24.6184   2
   0  16   2 468.572 23.0845   1
   0  16  -2 450.566 23.6494   1
  -1 -16  -2 52.5206 7.10092   2
   1 -16   2 40.3330 6.95708   2
   1  16   2 51.9894 6.41051   1
  -1  16  -2 44.3878 7.71091   1
   2 -16   2 82.0260 9.60564   2
   2  16   2 68.7031 8.68703   2
   2  16   2 73.6982 7.08142   1
  -2  16  -2 76.5777 10.1972   1
   3 -16   2 454.988 24.5606   2
  -3  16  -2 418.621 25.7360   1
   3  16   2 446.410 24.5893   2
   4 -16   2 3.98219 3.98712   2
   4  16   2 1.97271 2.43393   1
  -4  16  -2 9.41613 5.11240   1
   4  16   2 4.03739 3.02220   2
   4  16   2 4.44232 2.28536   1
   5 -16   2 444.101 25.0774   2
   5  16   2 458.122 25.3089   2
   5  16   2 427.441 15.5586   1
  -5  16  -2 408.943 27.1317   1
   5  16   2 426.083 15.4720   1
   6 -16   2 94.1178 11.3803   2
   6  16   2 105.238 11.5557   2
  -6  16  -2 83.7942 13.3792   1
   7 -16   2 -6.5807 2.91578   2
  -7  16  -2 0.28729 4.58717   1
   7  16   2 0.76260 2.81082   2
   8 -16   2 169.346 16.2627   2
  -8  16  -2 148.221 17.9109   1
   8  16   2 166.267 15.3278   2
   9 -16   2 14.3234 6.35682   2
   9  16   2 17.3528 5.41730   2
  -9  16  -2 4.04203 6.48145   1
  10 -16   2 356.110 26.0363   2
  10  16   2 374.633 25.5497   2
 -10  16  -2 369.632 29.3688   1
  11 -16   2 243.262 22.2953   2
 -11  16  -2 246.846 24.7649   1
  11  16   2 242.632 21.0372   2
  12 -16   2 1.66002 7.47251   2
  12  16   2 1.59227 6.20353   2
 -12  16  -2 0.78863 9.03424   1
  13 -16   2 61.9291 15.6678   2
  13  16   2 58.2160 12.7436   2
 -13  16  -2 55.1886 15.5114   1
  14 -16   2 3.08503 8.15185   2
 -14  16  -2 25.4157 14.4243   1
  14  16   2 11.6392 8.98510   2
  15 -16   2 4.01396 9.60771   2
  15  16   2 -0.9618 7.66668   2
 -15  16  -2 -13.314 11.5455   1
  15 -17  -2 112.412 18.5851   2
 -15  17   2 72.1110 17.5327   1
  15  17  -2 108.888 17.6685   2
  14 -17  -2 -12.552 7.17332   2
  14  17  -2 6.71268 6.66545   2
 -14  17   2 4.01614 10.7358   1
  13 -17  -2 89.6760 21.3811   2
 -13  17   2 73.0614 17.5009   1
  13  17  -2 101.943 15.9421   2
  12 -17  -2 49.6507 11.5571   2
  12  17  -2 80.1576 14.4827   2
 -12  17   2 98.0792 18.8849   1
  11 -17  -2 4.61700 5.66196   2
 -11  17   2 23.9467 9.58913   1
  11  17  -2 -1.6456 5.10404   2
  10 -17  -2 58.6199 11.7053   2
 -10  17   2 70.4186 15.5925   1
  10  17  -2 58.4413 12.4078   2
   9 -17  -2 91.9906 13.0569   2
   9  17  -2 107.035 13.7535   2
  -9  17   2 126.487 17.0117   1
   8 -17  -2 75.8859 10.4479   2
   8  17  -2 84.2106 11.7810   2
  -8  17   2 93.3088 14.0702   1
   7 -17  -2 54.2628 9.02025   2
   7  17  -2 31.9480 8.62512   2
  -7  17   2 39.0755 9.03946   1
   6 -17  -2 254.274 18.7938   2
  -6  17   2 290.985 21.8781   1
   6  17  -2 300.655 20.4219   2
   5 -17  -2 383.878 22.9547   2
   5  17  -2 406.597 15.6962   1
   5  17  -2 375.919 15.4106   1
  -5  17   2 435.061 26.3138   1
   5  17  -2 395.006 23.7424   2
   4 -17  -2 344.333 21.2910   2
  -4  17   2 386.118 24.0871   1
   4  17  -2 342.943 16.1609   1
   4  17  -2 366.413 16.7258   1
   3 -17  -2 1071.12 45.7613   2
   3  17  -2 997.818 45.8165   2
  -3  17   2 1038.04 46.7033   1
   3  17  -2 1081.91 49.2693   1
   2 -17  -2 16.5729 6.08266   2
  -2 -17   2 18.6377 5.66685   2
  -2  17   2 15.0103 4.99849   1
   2  17  -2 9.66119 3.53502   1
   1 -17  -2 910.616 40.2060   2
  -1 -17   2 891.290 40.3635   2
   1  17  -2 898.573 38.1009   1
  -1  17   2 847.461 38.9642   1
   0 -17  -2 144.862 12.5261   2
   0 -17   2 160.443 13.3793   2
   0  17   2 151.136 11.8712   1
   0  17  -2 124.671 11.6327   1
  -1 -17  -2 117.617 11.2896   2
   1 -17   2 91.1568 10.5936   2
   1  17   2 98.8770 9.26327   1
  -1  17  -2 83.7699 9.86914   1
   2 -17   2 226.656 16.9903   2
  -2  17  -2 263.493 18.5493   1
   2  17   2 259.094 17.6601   2
   3 -17   2 158.071 13.8207   2
  -3 -17  -2 154.740 13.5484   1
  -3  17  -2 118.271 13.4608   1
   3  17   2 131.410 12.6119   2
   4 -17   2 134.632 12.9510   2
   4  17   2 107.317 11.4778   2
   4  17   2 117.669 10.3148   1
   4  17   2 118.815 7.76527   1
  -4  17  -2 155.522 14.8500   1
   5 -17   2 25.5934 7.46769   2
   5  17   2 38.5468 7.31779   2
   5  17   2 14.7034 2.69020   1
  -5  17  -2 17.8654 7.87556   1
   5  17   2 16.5993 2.93917   1
   6  17   2 51.6257 10.6197   2
   7 -17   2 267.075 20.1755   2
   7  17   2 284.935 20.2644   2
  -7  17  -2 256.041 23.1214   1
   8 -17   2 23.3794 8.25975   2
  -8  17  -2 19.7290 8.46926   1
   8  17   2 17.2869 6.95876   2
   9 -17   2 70.3817 12.3037   2
  -9  17  -2 52.8995 12.1796   1
   9  17   2 80.9016 12.0176   2
  10 -17   2 22.9332 8.40186   2
 -10  17  -2 32.8983 11.7584   1
  10  17   2 28.2890 10.2901   2
  11 -17   2 2.11205 6.11974   2
  11  17   2 6.75200 7.56372   2
 -11  17  -2 9.44691 7.28861   1
  12 -17   2 30.4658 10.4734   2
  12  17   2 0.80518 5.20988   2
 -12  17  -2 9.96190 9.91380   1
  13 -17   2 28.9177 11.6791   2
 -13  17  -2 48.7635 13.8712   1
  13  17   2 34.9958 10.9938   2
  14 -17   2 23.5972 12.0516   2
  14  17   2 29.7450 10.3956   2
 -14  17  -2 22.2877 12.6870   1
  15 -18  -2 7.65764 9.65757   2
 -15  18   2 32.8922 13.5347   1
  14 -18  -2 16.6237 10.7460   2
 -14  18   2 14.0652 11.6091   1
  14  18  -2 9.06633 8.01284   2
  13 -18  -2 2.36389 7.07484   2
  13  18  -2 -2.2738 6.24408   2
 -13  18   2 0.25541 8.33606   1
  12 -18  -2 17.5405 9.09742   2
 -12  18   2 27.1427 11.6995   1
  12  18  -2 11.9147 6.74884   2
  11 -18  -2 25.4059 8.95063   2
 -11  18   2 44.9692 12.5776   1
  11  18  -2 15.1776 7.30228   2
  10 -18  -2 140.865 16.4893   2
 -10  18   2 138.126 20.2408   1
  10  18  -2 115.002 15.5768   2
   9 -18  -2 26.0152 7.36421   2
   9  18  -2 18.5882 7.42561   2
  -9  18   2 31.7753 10.5489   1
   8 -18  -2 262.411 19.7788   2
  -8  18   2 265.995 23.7308   1
   8  18  -2 244.471 20.1642   2
   7 -18  -2 88.4400 11.2087   2
  -7  18   2 110.464 14.4368   1
   7  18  -2 95.2957 12.1326   2
   6 -18  -2 5.51382 8.58076   2
   6  18  -2 1.15989 3.21485   2
  -6  18   2 0.32598 4.97647   1
   5 -18  -2 24.1170 6.59725   2
   5  18  -2 19.1491 3.35276   1
  -5  18   2 24.9191 6.99339   1
   5  18  -2 17.5275 3.07768   1
   5  18  -2 14.9567 4.78126   2
   4 -18  -2 104.437 10.6838   2
   4  18  -2 106.752 11.4116   2
   4  18  -2 88.3041 7.98894   1
  -4  18   2 104.289 11.9442   1
   3 -18  -2 5.41285 3.74504   2
   3  18  -2 -0.5743 2.48149   2
  -3  18   2 6.70333 4.18623   1
  -2 -18   2 793.157 38.4142   2
   2 -18  -2 859.249 38.8062   2
  -2  18   2 798.501 38.5980   1
   2  18  -2 814.416 35.1127   1
  -1 -18   2 762.713 36.8541   2
   1 -18  -2 763.828 36.3287   2
  -1  18   2 780.123 35.8518   1
   1  18  -2 741.751 34.3047   1
   0 -18   2 458.523 25.9524   2
   0 -18  -2 447.906 25.2298   2
   0  18   2 478.176 24.3107   1
   0  18  -2 431.669 24.4396   1
  -1 -18  -2 12.9451 4.78788   2
   1 -18   2 0.21565 3.04014   2
  -1  18  -2 4.35903 3.72818   1
   1  18   2 7.79799 3.72269   1
   2 -18   2 171.800 14.8998   2
   2  18   2 191.925 15.2637   2
   2  18   2 191.408 12.7127   1
  -2  18  -2 187.292 15.9396   1
   3 -18   2 35.1119 8.13377   2
   3  18   2 47.0445 8.00660   2
  -3  18  -2 43.4887 9.06417   1
   4 -18   2 296.891 20.7934   2
   4  18   2 308.518 15.1018   1
   4  18   2 354.532 21.9624   2
  -4  18  -2 315.130 23.0424   1
   5 -18   2 4.54193 4.29873   2
  -5  18  -2 19.0970 6.78231   1
   5  18   2 9.39546 2.26021   1
   5  18   2 6.54546 3.79679   2
   5  18   2 6.05535 1.92891   1
   6 -18   2 9.32734 5.98256   2
  -6  18  -2 11.9145 6.43968   1
   6  18   2 18.0084 6.46173   2
   7 -18   2 136.186 15.1518   2
   7  18   2 149.065 14.9802   2
  -7  18  -2 126.706 16.5628   1
   8 -18   2 362.152 25.4028   2
   8  18   2 367.556 24.7950   2
  -8  18  -2 325.215 27.7261   1
   9 -18   2 113.158 15.1144   2
  -9  18  -2 116.051 17.4769   1
   9  18   2 109.895 14.1925   2
  10 -18   2 45.2422 11.9375   2
 -10  18  -2 51.3663 13.5666   1
  10  18   2 66.2591 11.5624   2
  11 -18   2 98.0112 15.6497   2
  11  18   2 140.138 15.8120   2
 -11  18  -2 93.2765 19.4302   1
  12 -18   2 10.2723 12.4878   2
  12  18   2 53.1078 17.5436   2
 -12  18  -2 29.2112 12.5868   1
  13 -18   2 -2.1752 6.65114   2
 -13  18  -2 -4.3228 8.81516   1
  13  18   2 -3.3937 5.47857   2
  14 -18   2 89.5796 18.4594   2
  14  18   2 78.0254 15.7880   2
 -14  18  -2 71.4383 18.1181   1
  14 -19  -2 7.87809 10.3040   2
 -14  19   2 30.8229 15.3752   1
  14  19  -2 0.58198 8.26624   2
  13 -19  -2 -2.6329 6.98820   2
  13  19  -2 -3.2345 6.56298   2
 -13  19   2 -8.0973 8.53867   1
  12 -19  -2 25.0612 9.32489   2
  12  19  -2 19.1142 14.0090   2
 -12  19   2 -6.1898 10.4643   1
  11 -19  -2 255.935 23.4205   2
  11  19  -2 302.505 24.2930   2
 -11  19   2 313.121 29.1096   1
  10 -19  -2 13.3286 6.46238   2
  10  19  -2 25.6892 8.05622   2
 -10  19   2 17.2764 9.04397   1
   9 -19  -2 135.151 15.9283   2
   9  19  -2 124.440 14.8955   2
  -9  19   2 139.656 19.3476   1
   8 -19  -2 288.217 21.3578   2
   8  19  -2 271.691 21.8931   2
  -8  19   2 306.238 25.8274   1
   7 -19  -2 29.4075 7.56334   2
  -7  19   2 28.4470 8.15028   1
   7  19  -2 29.5307 8.15696   2
   6 -19  -2 12.7803 4.67544   2
   6  19  -2 0.19733 3.54655   2
  -6  19   2 1.66597 4.66106   1
   5 -19  -2 1.64874 4.29452   2
   5  19  -2 -3.8997 2.18786   1
  -5  19   2 9.11032 6.69390   1
   5  19  -2 2.13168 4.31533   2
   4 -19  -2 60.1495 9.08295   2
   4  19  -2 36.2059 6.43689   1
   4  19  -2 44.4381 10.2135   2
  -4  19   2 43.8394 9.15415   1
   3 -19  -2 31.0969 8.39306   2
   3  19  -2 17.2501 5.36287   2
  -3  19   2 43.3006 8.65520   1
   2 -19  -2 394.958 24.6419   2
  -2 -19   2 437.592 25.7424   2
  -2  19   2 481.353 26.6775   1
   2  19  -2 416.378 22.1994   1
  -1 -19   2 19.5830 6.62548   2
   1 -19  -2 17.4322 6.18594   2
   1  19  -2 8.78180 4.57407   1
   0 -19   2 16.9566 6.20732   2
   0 -19  -2 12.3297 5.19705   2
   0  19   2 21.9890 6.38142   1
   1 -19   2 991.269 46.1010   2
  -1 -19  -2 1049.97 45.7522   2
  -1  19  -2 975.319 46.3937   1
   1  19   2 1024.47 42.7099   1
   2 -19   2 9.36383 4.42910   2
   2  19   2 13.7512 4.46833   2
   2  19   2 19.8649 4.71448   1
  -2  19  -2 18.9765 6.46379   1
   3 -19   2 7.39180 5.67444   2
   3  19   2 -0.0596 2.16743   2
  -3  19  -2 7.97323 5.40102   1
   4  19   2 33.7037 5.80410   1
   4  19   2 34.4993 8.92310   2
  -4  19  -2 24.7911 6.43100   1
   4  19   2 37.9986 5.25229   1
   5 -19   2 300.481 21.7937   2
   5  19   2 320.578 13.1854   1
   5  19   2 336.469 22.2701   2
  -5  19  -2 324.992 24.8701   1
   5  19   2 319.379 13.4863   1
   6 -19   2 57.8993 12.2747   2
   6  19   2 96.4946 12.3734   2
  -6  19  -2 123.402 15.3488   1
   7 -19   2 85.7243 13.2400   2
  -7  19  -2 98.7773 16.0286   1
   7  19   2 66.3552 11.1379   2
   8 -19   2 429.784 28.6742   2
   8  19   2 410.103 27.7574   2
  -8  19  -2 517.815 34.6338   1
   9 -19   2 85.4124 14.3579   2
  -9  19  -2 101.757 17.8014   1
   9  19   2 83.5209 13.5735   2
  10 -19   2 21.4404 8.02584   2
  10  19   2 15.4179 7.05987   2
 -10  19  -2 19.3749 10.1348   1
  11 -19   2 1.59687 9.33906   2
  11  19   2 2.76130 5.46823   2
 -11  19  -2 -4.3059 7.98659   1
  12 -19   2 21.0185 10.2881   2
 -12  19  -2 25.8309 12.5564   1
  12  19   2 10.7679 7.88321   2
  13 -19   2 40.9514 13.2853   2
  13  19   2 24.2015 9.87154   2
 -13  19  -2 15.2477 13.7111   1
  14 -19   2 15.6140 8.58158   2
  14  19   2 1.00084 8.00187   2
 -14  19  -2 42.3351 17.4275   1
  14 -20  -2 6.56329 7.54570   2
 -14  20   2 -3.0222 10.6197   1
  14  20  -2 9.24753 8.34931   2
  13 -20  -2 -2.6977 7.66639   2
  13  20  -2 -0.4511 6.89677   2
 -13  20   2 14.6953 10.7559   1
  12 -20  -2 118.715 17.4814   2
  12  20  -2 138.202 18.2325   2
 -12  20   2 133.244 22.2457   1
  11 -20  -2 2.54720 6.60420   2
 -11  20   2 15.8233 9.70885   1
  11  20  -2 9.98655 7.00979   2
  10 -20  -2 0.18262 6.11268   2
  10  20  -2 -4.5124 4.92327   2
 -10  20   2 -3.3064 7.00386   1
   9 -20  -2 6.81499 6.83880   2
   9  20  -2 6.13105 5.79373   2
  -9  20   2 19.6594 9.38419   1
   8 -20  -2 318.799 24.1151   2
   8  20  -2 396.310 26.2448   2
  -8  20   2 328.853 28.2272   1
   7 -20  -2 39.0388 9.12740   2
   7  20  -2 71.3853 11.0538   2
  -7  20   2 83.7632 14.4243   1
   6 -20  -2 133.027 13.9291   2
   6  20  -2 145.722 14.8441   2
  -6  20   2 142.326 17.1002   1
   5 -20  -2 56.8645 9.88865   2
   5  20  -2 59.8232 9.82342   2
  -5  20   2 56.2511 11.6898   1
   4 -20  -2 52.2323 8.78858   2
   4  20  -2 48.2267 8.87450   2
   4  20  -2 32.2515 6.34727   1
  -4  20   2 53.2388 10.8595   1
   3 -20  -2 74.5065 10.3331   2
   3  20  -2 73.0828 12.9621   2
  -3  20   2 61.5309 9.98896   1
   2 -20  -2 497.080 28.8887   2
  -2 -20   2 522.754 29.9078   2
  -2  20   2 518.007 29.1652   1
   2  20  -2 524.467 25.7888   1
   1 -20  -2 3.55679 4.50645   2
  -1 -20   2 3.76383 4.34569   2
   1  20  -2 0.88609 3.44564   1
   0 -20  -2 601.799 32.1523   2
   0 -20   2 576.787 32.1872   2
   0  20   2 627.315 30.5126   1
  -1 -20  -2 44.4384 9.82759   2
   1 -20   2 53.7268 9.48715   2
  -1  20  -2 44.3733 14.3118   1
   1  20   2 47.8303 7.85797   1
   2 -20   2 602.209 36.8232   2
   2  20   2 623.998 33.2917   2
  -2  20  -2 645.921 34.4175   1
   2  20   2 644.183 29.1078   1
   3 -20   2 60.3736 10.9110   2
   3  20   2 98.3561 14.6411   2
  -3  20  -2 69.4750 11.2123   1
   4 -20   2 220.140 18.2766   2
   4  20   2 226.744 18.4111   2
   4  20   2 262.013 13.5028   1
   5 -20   2 96.7413 13.3241   2
  -5  20  -2 84.4699 14.8530   1
   5  20   2 115.563 9.61722   1
   5  20   2 144.988 14.6638   2
   6 -20   2 583.447 34.6250   2
  -6  20  -2 676.682 39.1668   1
   6  20   2 641.503 34.9577   2
   7 -20   2 2.41440 6.13055   2
  -7  20  -2 3.65897 6.35153   1
   7  20   2 4.80588 4.21143   2
   8 -20   2 10.8001 6.51176   2
   8  20   2 8.08483 6.05446   2
  -8  20  -2 6.28402 7.36896   1
   9 -20   2 16.1051 7.75173   2
   9  20   2 0.66348 4.90348   2
  -9  20  -2 9.71984 8.19577   1
  10 -20   2 74.2842 15.0010   2
  10  20   2 113.159 14.7489   2
 -10  20  -2 51.8179 15.2115   1
  11 -20   2 36.5391 12.6994   2
 -11  20  -2 36.5505 12.6608   1
  11  20   2 59.5447 13.8643   2
  12 -20   2 39.6542 10.0165   2
  12  20   2 45.7298 12.9246   2
 -12  20  -2 66.1086 15.4619   1
  13 -20   2 50.9626 13.9098   2
 -13  20  -2 27.8768 14.3576   1
  13  20   2 47.4364 12.4679   2
  13 -21  -2 6.21864 8.57911   2
  13  21  -2 -0.9814 8.06838   2
 -13  21   2 1.01670 10.6978   1
 -12  21   2 61.6010 18.3080   1
  12  21  -2 46.1641 12.1491   2
  11 -21  -2 48.0382 12.6806   2
 -11  21   2 50.7274 23.9904   1
  10 -21  -2 49.7686 11.8777   2
 -10  21   2 60.1010 16.6060   1
  10  21  -2 80.9452 14.2652   2
   9 -21  -2 275.451 23.3142   2
   9  21  -2 303.102 24.3217   2
  -9  21   2 275.253 27.0913   1
   8 -21  -2 3.96475 5.16282   2
   8  21  -2 6.93174 5.67719   2
  -8  21   2 23.7440 9.83834   1
   7 -21  -2 11.2608 6.04058   2
   7  21  -2 22.3999 8.35461   2
  -7  21   2 39.1052 11.8062   1
   6 -21  -2 181.340 17.1348   2
  -6  21   2 143.850 17.6633   1
   6  21  -2 151.821 15.7585   2
   5 -21  -2 65.6797 10.4126   2
   5  21  -2 59.9059 10.5605   2
  -5  21   2 64.7409 12.6874   1
   4 -21  -2 -5.1857 3.07310   2
   4  21  -2 2.11164 3.97637   2
   4  21  -2 10.2095 3.77446   1
  -4  21   2 -0.9978 4.02535   1
   3 -21  -2 40.7612 8.39180   2
  -3  21   2 41.4240 9.77971   1
   3  21  -2 41.3924 8.41270   2
   2 -21  -2 263.555 19.3389   2
  -2 -21   2 239.940 19.5802   2
  -2  21   2 262.392 19.8499   1
   2  21  -2 249.134 16.3311   1
  -1 -21   2 0.37310 4.77079   2
   1 -21  -2 1.40680 4.38849   2
   1  21  -2 7.04836 4.88763   1
  -1  21   2 1.95646 5.11402   1
   0 -21  -2 105.080 13.2848   2
   0 -21   2 105.051 12.0645   2
   0  21   2 118.459 11.9044   1
   0  21  -2 105.211 11.6104   1
   1 -21   2 1007.01 46.9460   2
  -1 -21  -2 959.591 45.9183   2
  -1  21  -2 978.460 45.9148   1
   1  21   2 988.306 42.8092   1
   2 -21   2 243.143 19.1254   2
   2  21   2 218.506 18.0236   2
  -2  21  -2 227.894 19.3999   1
   2  21   2 260.114 16.1140   1
   3 -21   2 74.7188 11.5645   2
   3  21   2 65.9778 10.6353   2
  -3  21  -2 67.2808 11.8788   1
   4 -21   2 6.18644 5.36414   2
  -4  21  -2 -6.5828 4.16372   1
   4  21   2 9.77989 4.74885   2
   4  21   2 1.14052 2.79344   1
   5 -21   2 436.303 28.6088   2
   5  21   2 416.788 18.1568   1
  -5  21  -2 477.376 31.7999   1
   5  21   2 492.205 28.6404   2
   6 -21   2 -0.7853 4.86382   2
   6  21   2 5.16815 4.16942   2
  -6  21  -2 -3.5561 4.85518   1
   7 -21   2 24.9020 8.87418   2
  -7  21  -2 25.5416 10.8102   1
   7  21   2 22.5753 7.99868   2
   8 -21   2 109.850 15.7287   2
  -8  21  -2 94.6665 17.7231   1
   8  21   2 162.478 17.2030   2
   9 -21   2 58.2180 12.4676   2
  -9  21  -2 68.6147 16.5101   1
   9  21   2 99.9492 14.1223   2
  10 -21   2 24.9610 9.58876   2
  10  21   2 28.4447 11.0545   2
 -10  21  -2 25.9023 12.7111   1
  11 -21   2 5.77291 8.04229   2
  11  21   2 -0.6877 7.80421   2
 -11  21  -2 -0.8544 9.92461   1
  12 -21   2 164.874 20.7595   2
 -12  21  -2 111.995 22.6501   1
  12  21   2 88.1745 16.1699   2
  13 -21   2 -16.534 7.57869   2
  13  21   2 -1.8650 7.63282   2
 -13  21  -2 -7.3489 10.8490   1
  13 -22  -2 20.0740 11.1488   2
  13  22  -2 5.43598 9.11562   2
 -13  22   2 -18.591 9.56827   1
  12 -22  -2 20.5264 10.3620   2
 -12  22   2 32.1316 14.5283   1
  12  22  -2 60.7104 15.1483   2
  11 -22  -2 -0.0067 7.26200   2
  11  22  -2 -7.0478 5.78609   2
 -11  22   2 10.4646 10.5353   1
  10 -22  -2 13.6583 9.00184   2
 -10  22   2 8.95230 9.44041   1
  10  22  -2 9.59586 8.62364   2
   9 -22  -2 129.521 18.0059   2
   9  22  -2 166.582 19.0122   2
  -9  22   2 179.966 22.9021   1
   8 -22  -2 31.6752 9.53091   2
  -8  22   2 33.3514 9.97266   1
   8  22  -2 22.8527 8.59472   2
   7 -22  -2 5.20763 6.14520   2
   7  22  -2 -2.1887 4.40313   2
  -7  22   2 1.28736 5.79246   1
   6 -22  -2 28.9223 8.14458   2
   6  22  -2 19.4973 7.94932   2
  -6  22   2 20.8246 7.98681   1
   5 -22  -2 70.7169 11.3370   2
   5  22  -2 68.5086 11.8765   2
  -5  22   2 82.9414 13.8410   1
   4 -22  -2 157.062 15.1541   2
  -4  22   2 148.455 16.4094   1
   4  22  -2 162.406 16.1449   2
   4  22  -2 138.698 11.8045   1
   3 -22  -2 308.754 22.4192   2
   3  22  -2 313.224 22.7330   2
   3  22  -2 320.611 18.4763   1
  -2 -22   2 281.253 21.4438   2
   2 -22  -2 255.846 19.6791   2
   2  22  -2 306.371 22.3382   2
   2  22  -2 324.077 19.3827   1
  -2  22   2 283.806 21.2651   1
   1 -22  -2 33.0721 8.93246   2
  -1 -22   2 31.9721 9.18956   2
  -1  22   2 31.3953 8.52303   1
   1  22  -2 41.8192 8.79779   1
   0 -22   2 211.551 18.0890   2
   0 -22  -2 190.272 17.1432   2
   0  22   2 193.885 16.3627   1
   0  22  -2 212.093 17.3337   1
  -1 -22  -2 483.330 29.1172   2
   1 -22   2 491.074 29.7538   2
  -1  22  -2 450.597 28.1922   1
   1  22   2 545.761 27.6182   1
   2 -22   2 141.604 15.5688   2
  -2  22  -2 157.070 16.4987   1
   2  22   2 130.557 12.2184   1
   2  22   2 169.577 16.0182   2
   3 -22   2 6.64868 6.01443   2
   3  22   2 11.7355 4.71975   1
  -3  22  -2 8.73652 5.32226   1
   3  22   2 3.22332 5.10341   2
   4 -22   2 159.031 17.2083   2
   4  22   2 124.935 14.6651   2
   4  22   2 130.207 10.4461   1
  -4  22  -2 140.786 17.1245   1
   5 -22   2 25.3489 9.09882   2
  -5  22  -2 12.1389 8.08455   1
   5  22   2 12.8417 5.74961   2
   6 -22   2 1.22309 5.47540   2
   6  22   2 2.69826 5.82506   2
  -6  22  -2 13.7339 7.52649   1
   7 -22   2 17.7105 8.13340   2
  -7  22  -2 24.1337 8.76574   1
   7  22   2 12.8525 8.23293   2
   8 -22   2 -3.0548 5.76733   2
   8  22   2 1.86632 5.62112   2
  -8  22  -2 -8.4195 8.55258   1
   9 -22   2 55.0514 12.9772   2
  -9  22  -2 75.6660 17.7228   1
   9  22   2 45.6680 10.8548   2
  10  22   2 3.13774 10.0136   2
  11 -22   2 95.8973 18.2499   2
 -11  22  -2 103.159 20.8355   1
  11  22   2 44.0652 13.1194   2
  12 -22   2 30.1056 11.3354   2
 -12  22  -2 -1.7300 11.2217   1
  12  22   2 6.61280 8.19088   2
  12 -23  -2 11.1269 9.83609   2
 -12  23   2 11.9446 10.1626   1
  12  23  -2 0.26976 8.92150   2
  11 -23  -2 43.7047 11.8246   2
  11  23  -2 53.6239 12.7991   2
 -11  23   2 64.6107 17.0193   1
  10 -23  -2 140.140 28.6861   2
 -10  23   2 170.281 29.3902   1
  10  23  -2 157.039 19.8474   2
   9 -23  -2 2.05973 6.88696   2
  -9  23   2 1.26132 8.09547   1
   9  23  -2 -0.2867 5.37774   2
   8 -23  -2 -3.0226 6.21827   2
   8  23  -2 4.64210 6.13616   2
  -8  23   2 2.39134 6.86708   1
   7 -23  -2 2.32056 5.69070   2
   7  23  -2 -2.9238 4.57304   2
  -7  23   2 -3.8890 6.08548   1
   6 -23  -2 477.733 29.9097   2
  -6  23   2 467.820 32.8707   1
   6  23  -2 414.163 28.9375   2
   5 -23  -2 -3.3159 5.23783   2
   5  23  -2 2.51901 4.93285   2
  -5  23   2 -5.1292 5.28318   1
   4 -23  -2 323.679 23.3197   2
   4  23  -2 336.386 19.2709   1
  -4  23   2 375.374 27.3280   1
   4  23  -2 348.045 25.1300   2
   3 -23  -2 434.579 28.1189   2
   3  23  -2 451.530 23.7831   1
  -3  23   2 444.690 28.9744   1
   3  23  -2 471.337 29.2895   2
  -2 -23   2 38.1389 9.68809   2
   2 -23  -2 21.0240 6.26180   2
   2  23  -2 37.0353 9.65339   2
  -2  23   2 38.0004 9.38575   1
   2  23  -2 27.6608 7.84674   1
  -1 -23   2 9.36691 5.90646   2
   1 -23  -2 0.27242 3.66078   2
   1  23  -2 3.07764 4.15861   1
  -1  23   2 -5.5666 3.94973   1
   0 -23  -2 140.176 14.4915   2
   0 -23   2 123.105 14.9463   2
   0  23  -2 147.657 14.9540   1
   0  23   2 139.955 14.0430   1
   1 -23   2 73.7041 12.4944   2
  -1 -23  -2 72.6308 10.4525   2
  -1  23  -2 56.5845 12.0278   1
   1  23   2 55.6707 9.87799   1
   2 -23   2 0.04099 4.73388   2
  -2  23  -2 12.2032 9.03335   1
   2  23   2 2.88951 3.64967   1
   2  23   2 -1.7454 3.87537   2
   3 -23   2 238.330 20.5893   2
   3  23   2 236.033 18.8537   2
  -3  23  -2 211.303 20.8419   1
   3  23   2 211.139 14.7642   1
   4 -23   2 5.20637 6.48603   2
  -4  23  -2 8.28558 6.83972   1
   4  23   2 9.76647 6.26034   2
   5 -23   2 13.9143 7.18509   2
   5  23   2 7.00181 3.13770   1
   5  23   2 4.31213 4.87932   2
  -5  23  -2 0.93672 6.38816   1
   6 -23   2 78.4640 14.0454   2
   6  23   2 53.5222 11.1013   2
  -6  23  -2 80.8626 15.3949   1
   7 -23   2 8.78044 7.33940   2
   7  23   2 13.2398 6.93169   2
  -7  23  -2 -6.3503 8.07907   1
   8 -23   2 7.47654 7.87329   2
  -8  23  -2 3.04908 8.97702   1
   8  23   2 14.7206 7.43276   2
   9 -23   2 4.74397 7.51947   2
   9  23   2 17.8206 9.45088   2
  -9  23  -2 17.6261 10.9748   1
  10 -23   2 40.9312 11.3314   2
  10  23   2 31.8714 9.87107   2
 -10  23  -2 12.7244 11.5144   1
  11 -23   2 66.8060 14.5905   2
 -11  23  -2 45.6871 16.6308   1
  11  23   2 56.5501 14.6149   2
  12 -23   2 2.69093 8.96893   2
 -12  23  -2 -6.3145 10.2370   1
  12  23   2 -13.419 7.11374   2
  12 -24  -2 11.8864 11.8159   2
 -12  24   2 33.3674 13.9780   1
  12  24  -2 28.9234 10.6882   2
  11 -24  -2 26.4414 11.4980   2
  11  24  -2 17.1999 9.50710   2
 -11  24   2 24.6693 14.2790   1
  10 -24  -2 -0.9967 6.75553   2
  10  24  -2 16.4669 8.52934   2
 -10  24   2 -0.6808 10.5653   1
   9 -24  -2 22.8661 10.6294   2
   9  24  -2 14.1808 11.2403   2
  -9  24   2 5.90468 11.5588   1
   8 -24  -2 3.34922 7.18242   2
  -8  24   2 2.40237 8.28528   1
   8  24  -2 0.17955 5.35883   2
   7 -24  -2 -0.3085 6.06017   2
   7  24  -2 -0.2818 4.90437   2
  -7  24   2 -3.1718 7.08051   1
   6 -24  -2 5.02356 5.38319   2
  -6  24   2 11.2236 8.41405   1
   6  24  -2 8.11128 5.95320   2
   5 -24  -2 171.742 18.3433   2
   5  24  -2 209.664 19.8100   2
  -5  24   2 158.329 19.8557   1
   4 -24  -2 99.0304 14.0382   2
   4  24  -2 94.1112 10.0703   1
   4  24  -2 81.7959 13.2407   2
  -4  24   2 90.7333 15.5002   1
   3 -24  -2 38.0694 10.1287   2
   3  24  -2 36.4880 8.04873   1
  -3  24   2 39.6481 10.1507   1
   3  24  -2 20.1398 7.73861   2
   2 -24  -2 135.015 15.4891   2
  -2  24   2 132.483 15.6712   1
   2  24  -2 116.846 14.2508   2
   2  24  -2 127.502 13.7878   1
  -1 -24   2 4.28959 5.29817   2
   1 -24  -2 6.99689 4.89754   2
  -1  24   2 3.58738 5.05325   1
   1  24  -2 14.2322 6.79629   1
   0 -24   2 32.6326 8.07015   2
   0 -24  -2 45.5935 8.70320   2
   0  24  -2 29.6530 8.56771   1
   0  24   2 58.2585 10.6245   1
  -1 -24  -2 69.8831 11.6324   2
   1 -24   2 59.6221 11.9179   2
   1  24   2 33.1808 8.53285   2
  -1  24  -2 73.2183 17.2091   1
   1  24   2 61.6929 10.4409   1
   2 -24   2 6.43195 6.47886   2
  -2  24  -2 14.2312 7.34757   1
   2  24   2 -3.4555 4.68988   1
   2  24   2 6.41408 4.26463   2
   3 -24   2 198.221 19.7264   2
  -3  24  -2 219.064 27.5074   1
   3  24   2 195.871 18.1789   2
   3  24   2 204.190 19.2078   1
   4 -24   2 7.26335 5.81952   2
   4  24   2 4.16548 5.14370   2
  -4  24  -2 0.45746 6.23727   1
   5 -24   2 41.6187 10.5903   2
  -5  24  -2 20.0999 9.08190   1
   5  24   2 59.1845 11.6166   2
   6 -24   2 73.1397 13.5980   2
   6  24   2 48.7078 10.5665   2
  -6  24  -2 63.3129 15.4242   1
   7 -24   2 35.0514 9.86432   2
  -7  24  -2 41.1878 14.0548   1
   7  24   2 24.4188 7.78404   2
   8 -24   2 39.5021 11.2200   2
  -8  24  -2 26.9675 10.5396   1
   8  24   2 29.5256 9.34450   2
   9 -24   2 97.4728 16.9302   2
   9  24   2 68.7805 13.8399   2
  -9  24  -2 96.6427 20.4527   1
  10 -24   2 104.666 19.1321   2
  10  24   2 131.633 18.8164   2
 -10  24  -2 104.051 20.9783   1
  11 -24   2 26.5690 10.1001   2
  11  24   2 28.9730 10.9696   2
 -11  24  -2 38.2471 14.2096   1
  11 -25  -2 9.89521 9.16032   2
 -11  25   2 10.7753 12.9851   1
  11  25  -2 12.3371 10.4728   2
  10 -25  -2 8.22619 9.59186   2
 -10  25   2 18.9501 14.2341   1
  10  25  -2 28.0331 11.5580   2
   9 -25  -2 9.45907 8.12538   2
  -9  25   2 8.02282 9.81714   1
   9  25  -2 -0.2621 6.69999   2
   8 -25  -2 225.016 22.7656   2
   8  25  -2 244.845 24.0462   2
  -8  25   2 242.130 27.1528   1
   7 -25  -2 58.6029 13.3494   2
  -7  25   2 68.6719 14.5881   1
   7  25  -2 75.7125 13.9595   2
   6 -25  -2 20.6144 9.17591   2
  -6  25   2 35.5838 11.6914   1
   6  25  -2 22.7559 7.69780   2
   5 -25  -2 5.39506 6.94750   2
   5  25  -2 6.03779 5.27774   2
  -5  25   2 10.0184 7.15538   1
   4 -25  -2 267.779 22.8010   2
  -4  25   2 247.708 34.3405   1
   4  25  -2 279.188 23.4862   2
   3 -25  -2 7.39279 4.87611   2
   3  25  -2 27.9131 9.91934   1
   3  25  -2 4.56092 5.59714   2
   2 -25  -2 90.3327 13.7128   2
  -2  25   2 78.6704 13.6951   1
   2  25  -2 89.7824 12.5078   1
   2  25  -2 84.4507 13.3890   2
   1 -25  -2 205.866 19.3698   2
  -1 -25   2 221.439 20.3235   2
   1  25  -2 203.926 18.5179   1
  -1  25   2 176.725 17.5334   1
   0 -25  -2 30.4162 7.60655   2
   0 -25   2 33.6402 10.3645   2
   0  25   2 30.5257 9.15837   1
   0  25  -2 55.3923 11.7747   1
   1 -25   2 -1.4493 5.43437   2
  -1 -25  -2 -1.5002 3.71107   2
   1  25   2 2.27830 5.39690   2
  -1  25  -2 1.09266 5.32129   1
   1  25   2 -1.7265 4.78722   1
   2 -25   2 173.720 18.2354   2
  -2  25  -2 163.564 18.4662   1
   2  25   2 138.426 14.2060   1
   2  25   2 181.006 17.9074   2
   3 -25   2 74.9539 15.1130   2
   3  25   2 56.9090 11.5744   2
   4 -25   2 81.4015 14.3523   2
  -4  25  -2 45.8224 12.2046   1
   4  25   2 60.6561 12.1431   2
   5 -25   2 12.3352 8.29028   2
  -5  25  -2 12.0221 10.4989   1
   5  25   2 19.8838 8.55717   2
   6 -25   2 154.885 18.9453   2
  -6  25  -2 163.627 22.7078   1
   6  25   2 157.003 18.1695   2
   7 -25   2 274.999 24.1081   2
  -7  25  -2 255.266 26.9310   1
   7  25   2 239.069 21.8790   2
   8 -25   2 4.70721 7.25248   2
   8  25   2 -4.8334 6.68758   2
   9 -25   2 -3.0305 7.52505   2
  -9  25  -2 16.7453 10.3132   1
   9  25   2 7.18375 8.27656   2
  10 -25   2 280.718 25.5010   2
  10  25   2 198.235 22.7489   2
 -10  25  -2 178.403 27.0439   1
  11 -25   2 0.96192 8.86166   2
  11  25   2 -12.851 7.64896   2
 -11  25  -2 17.0574 13.2777   1
  11 -26  -2 72.6589 15.6111   2
 -11  26   2 56.8353 16.8330   1
  11  26  -2 101.534 19.3254   2
  10 -26  -2 12.3592 9.28718   2
 -10  26   2 13.0412 12.1409   1
  10  26  -2 14.7775 9.07167   2
   9 -26  -2 35.2238 12.5682   2
  -9  26   2 35.1095 12.7498   1
   9  26  -2 19.3535 11.2384   2
   8 -26  -2 12.5666 8.24249   2
  -8  26   2 6.90344 8.86006   1
   8  26  -2 10.1581 6.86093   2
   7 -26  -2 2.80429 7.48536   2
   7  26  -2 11.3551 7.49468   2
  -7  26   2 7.60650 11.1110   1
   6 -26  -2 182.517 20.4954   2
  -6  26   2 216.525 24.5069   1
   6  26  -2 197.947 20.5382   2
   5 -26  -2 9.35462 6.85986   2
  -5  26   2 3.55027 7.99171   1
   5  26  -2 1.21608 5.55818   2
   4 -26  -2 57.5807 13.4679   2
  -4  26   2 27.5165 10.6085   1
   4  26  -2 67.1811 12.8179   2
   3 -26  -2 157.246 18.0336   2
   3  26  -2 156.033 18.0577   2
  -3  26   2 165.599 18.6605   1
   3  26  -2 135.231 14.1858   1
   2 -26  -2 164.995 17.8858   2
   2  26  -2 175.985 17.0171   1
   2  26  -2 157.697 17.9946   2
  -2  26   2 156.280 18.3649   1
  -1 -26   2 13.8745 7.50672   2
   1 -26  -2 10.8799 6.96820   2
  -1  26   2 22.7666 8.57922   1
   1  26  -2 20.0194 7.42727   1
   0 -26   2 419.377 29.5885   2
   0 -26  -2 463.228 29.4466   2
   0  26  -2 381.507 27.4216   1
   1 -26   2 5.16689 6.50931   2
   1  26   2 -3.6463 4.60722   2
  -1  26  -2 3.00305 6.68061   1
   1  26   2 6.13788 6.11379   1
   2 -26   2 2.04475 6.19366   2
   2  26   2 3.83762 5.01869   2
   2  26   2 -3.5367 5.39110   1
  -2  26  -2 4.46097 7.28183   1
   3 -26   2 226.405 22.0344   2
  -3  26  -2 242.098 22.6952   1
   3  26   2 211.163 20.6641   2
   3  26   2 190.714 19.0118   1
   4 -26   2 5.60631 6.89432   2
   4  26   2 -1.5879 5.18414   2
  -4  26  -2 -1.3444 7.65449   1
   5 -26   2 -6.2205 5.36193   2
   5  26   2 13.8825 6.88196   2
  -5  26  -2 6.01838 9.12109   1
   6 -26   2 108.647 17.0560   2
   6  26   2 115.555 16.9418   2
  -6  26  -2 125.979 20.7309   1
   7 -26   2 19.5929 13.3040   2
  -7  26  -2 34.3630 12.8765   1
   8 -26   2 42.2890 12.2112   2
   8  26   2 45.7892 10.5146   2
  -8  26  -2 45.1996 14.6475   1
   9 -26   2 122.357 19.0576   2
  -9  26  -2 118.761 24.0172   1
   9  26   2 103.696 18.0314   2
  10 -26   2 68.0680 14.0505   2
  10  26   2 34.6589 11.9196   2
 -10  26  -2 34.7489 15.5842   1
  10 -27  -2 4.90132 10.6056   2
  10  27  -2 8.20799 10.6154   2
   9 -27  -2 84.8895 17.3166   2
  -9  27   2 124.220 23.6871   1
   9  27  -2 101.599 18.7428   2
   8 -27  -2 102.557 17.9774   2
   8  27  -2 118.973 17.8764   2
  -8  27   2 75.9166 17.7041   1
   7 -27  -2 75.3149 15.3461   2
   7  27  -2 84.8838 14.6900   2
  -7  27   2 24.6893 17.5276   1
   6 -27  -2 6.82703 7.87365   2
  -6  27   2 10.7146 11.3027   1
   6  27  -2 2.82220 7.85812   2
   5 -27  -2 -5.7201 6.33370   2
   5  27  -2 6.57554 6.84228   2
  -5  27   2 5.02862 8.43305   1
   4 -27  -2 34.1373 9.34301   2
   4  27  -2 62.0016 12.5525   2
  -4  27   2 23.9232 10.5471   1
   3 -27  -2 45.9431 12.7973   2
   3  27  -2 62.2066 11.8408   1
   3  27  -2 37.0346 10.4587   2
  -3  27   2 49.1241 13.0379   1
   2 -27  -2 26.6860 10.0930   2
   2  27  -2 18.0759 7.45345   1
  -2  27   2 26.6340 8.86947   1
   2  27  -2 22.9085 10.2403   2
   1 -27  -2 470.191 32.1735   2
  -1 -27   2 491.265 33.3732   2
  -1  27   2 544.916 32.6979   1
   0 -27   2 13.1812 7.89437   2
   0 -27  -2 20.4021 7.12119   2
   0  27   2 30.2939 8.95385   1
   0  27  -2 41.5915 11.3565   1
   1 -27   2 0.30882 5.00743   2
  -1  27  -2 0.22715 7.09847   1
   1  27   2 6.89651 6.13308   2
   1  27   2 -1.3561 6.03510   1
   2 -27   2 73.9937 14.9580   2
  -2  27  -2 40.3395 11.1605   1
   2  27   2 86.5348 14.1198   2
   2  27   2 66.8203 11.8618   1
   3 -27   2 12.3422 7.43301   2
  -3  27  -2 0.57055 8.01708   1
   3  27   2 13.4667 6.49137   1
   3  27   2 16.0878 7.41295   2
   4 -27   2 28.3033 10.8040   2
  -4  27  -2 26.9853 11.4521   1
   4  27   2 33.9934 9.66686   2
   5 -27   2 110.343 18.0234   2
  -5  27  -2 128.761 21.2875   1
   5  27   2 117.813 16.9301   2
   6 -27   2 29.0731 9.98240   2
   6  27   2 6.52669 10.1566   2
  -6  27  -2 27.1187 13.5398   1
   7 -27   2 -0.6897 7.46194   2
   7  27   2 -12.095 4.99134   2
  -7  27  -2 -22.689 8.14600   1
   8 -27   2 22.1252 9.84789   2
  -8  27  -2 29.5755 13.7220   1
   8  27   2 17.9675 9.03460   2
   9 -27   2 -5.0299 7.85139   2
  -9  27  -2 15.3720 13.0570   1
   9  27   2 3.93402 8.39661   2
   9 -28  -2 8.40029 9.52292   2
   9  28  -2 39.7863 13.5600   2
  -9  28   2 52.2496 16.6286   1
   8 -28  -2 45.5751 12.1986   2
  -8  28   2 35.6429 15.0327   1
   8  28  -2 58.8004 15.3055   2
   7 -28  -2 273.355 25.6547   2
  -7  28   2 247.552 27.9504   1
   7  28  -2 305.515 26.7616   2
   6 -28  -2 -4.5015 7.39340   2
  -6  28   2 -9.9487 13.9169   1
   6  28  -2 4.56525 7.76106   2
  -5  28   2 0.85773 7.62043   1
   5  28  -2 11.1794 8.64535   2
   4 -28  -2 51.3441 12.7790   2
  -4  28   2 72.8443 16.2897   1
   4  28  -2 77.5000 13.7744   2
   3 -28  -2 36.8444 11.0368   2
   3  28  -2 46.5640 11.0465   2
  -3  28   2 46.9581 11.0364   1
   2 -28  -2 -8.7057 6.38374   2
   2  28  -2 5.28447 6.13693   2
  -2  28   2 -7.6732 6.77217   1
  -1 -28   2 -10.350 5.32651   2
   1 -28  -2 7.22131 7.21818   2
  -1  28   2 -8.3493 6.66211   1
   1  28  -2 -2.0320 7.19571   1
   1  28  -2 -6.4701 4.87211   2
   0 -28   2 8.31309 7.13011   2
   0 -28  -2 6.14101 6.24852   2
   0  28   2 13.1838 7.32904   1
   0  28  -2 2.73398 8.39751   1
   1 -28   2 14.7818 8.86164   2
   1  28   2 15.7890 7.64114   1
   1  28   2 5.77140 7.02929   2
  -1  28  -2 -10.052 7.98835   1
   2 -28   2 29.9586 10.2368   2
  -2  28  -2 40.1866 10.9158   1
   2  28   2 31.7782 9.41899   2
   3 -28   2 128.657 18.6558   2
  -3  28  -2 112.995 19.4419   1
   3  28   2 151.419 14.2291   1
   3  28   2 105.674 16.0771   2
   4 -28   2 -3.6487 7.61594   2
  -4  28  -2 -3.9157 8.45326   1
   4  28   2 8.27709 7.30265   2
   5 -28   2 10.4137 10.6746   2
   5  28   2 15.5168 8.39750   2
  -5  28  -2 20.9990 11.6518   1
   6 -28   2 83.9470 17.2324   2
  -6  28  -2 58.8958 15.0018   1
   6  28   2 97.0254 15.7971   2
   7 -28   2 102.306 18.6390   2
   7  28   2 125.654 18.2461   2
  -7  28  -2 123.343 25.3661   1
   8 -28   2 0.86770 8.60967   2
   8  28   2 9.14325 8.62801   2
  -8  28  -2 9.54379 12.4064   1
   9 -28   2 6.45706 8.58797   2
   9  28   2 16.5113 10.4578   2
  -9  28  -2 10.2666 12.2434   1
   8 -29  -2 122.892 21.1416   2
   8  29  -2 156.214 20.6540   2
  -8  29   2 143.759 25.8795   1
   7 -29  -2 1.81132 7.81948   2
   7  29  -2 7.28906 8.71953   2
  -7  29   2 18.4747 11.1142   1
   6 -29  -2 -9.0143 8.30686   2
  -6  29   2 -10.469 9.52918   1
   6  29  -2 6.66274 7.95214   2
   5 -29  -2 23.3775 9.83199   2
   5  29  -2 48.2342 14.0869   2
  -5  29   2 38.0052 13.8337   1
   4 -29  -2 13.6162 8.37771   2
  -4  29   2 -4.3127 8.63266   1
   4  29  -2 -2.2861 7.83756   2
   3 -29  -2 24.9248 12.0771   2
   3  29  -2 24.0281 9.50586   1
  -3  29   2 -8.2045 7.42566   1
   3  29  -2 22.3171 11.4795   2
   2 -29  -2 0.39850 8.09760   2
  -2  29   2 8.54237 8.99212   1
   1 -29  -2 -5.8374 7.07724   2
   1  29  -2 4.02438 8.05426   2
  -1  29   2 -3.9222 7.29735   1
   1  29  -2 15.1425 8.85083   1
   0 -29   2 60.0164 15.7813   2
   0 -29  -2 93.0938 16.1321   2
   0  29   2 92.1018 15.4421   2
   0  29  -2 51.9342 12.2359   1
   0  29   2 76.1355 14.6428   1
   1 -29   2 0.91058 9.20703   2
   1  29   2 -0.3613 6.00678   2
  -1  29  -2 -3.9668 7.55205   1
   1  29   2 -17.849 6.39624   1
   2 -29   2 82.3180 23.7088   2
  -2  29  -2 120.407 20.0637   1
   2  29   2 103.686 25.0950   2
   3 -29   2 27.0714 11.7986   2
  -3  29  -2 26.9336 11.1591   1
   3  29   2 14.0264 9.23218   2
   3  29   2 19.9412 8.57195   1
   4 -29   2 37.8466 13.4439   2
  -4  29  -2 44.9730 15.4072   1
   4  29   2 52.6015 12.2552   2
   5 -29   2 65.6813 13.8419   2
   5  29   2 60.7422 12.5083   2
  -5  29  -2 70.8331 20.0599   1
   6 -29   2 31.3248 12.0438   2
   6  29   2 31.1505 11.0001   2
  -6  29  -2 29.7265 13.4479   1
   7 -29   2 17.8615 11.9334   2
   7  29   2 35.7247 12.2183   2
  -7  29  -2 56.4120 17.3281   1
   8 -29   2 -16.996 8.93118   2
   8  29   2 -2.1898 7.23106   2
  -8  29  -2 10.2395 12.7582   1
   7 -30  -2 -2.5461 8.13365   2
  -7  30   2 1.06653 10.1225   1
   7  30  -2 -6.9320 7.19367   2
   6 -30  -2 1.05696 9.47511   2
  -6  30   2 14.0057 12.6040   1
   6  30  -2 1.35328 7.36584   2
   5 -30  -2 2.70238 7.56228   2
  -5  30   2 37.6268 12.1549   1
   5  30  -2 1.53839 8.46962   2
   4 -30  -2 4.18956 7.78027   2
  -4  30   2 9.80066 10.1934   1
   4  30  -2 7.57202 7.81724   2
   3 -30  -2 35.1812 11.4678   2
   3  30  -2 39.7873 10.9851   2
  -3  30   2 50.4613 13.8584   1
   2 -30  -2 124.178 18.4638   2
  -2  30   2 113.646 19.4412   1
   2  30  -2 128.885 19.7799   2
   2  30  -2 129.782 19.2512   1
   1 -30  -2 72.6238 15.1017   2
   1  30  -2 67.6424 18.4220   1
   1  30  -2 45.1581 12.3462   2
  -1  30   2 83.9504 16.3981   1
   0 -30   2 6.20351 7.10441   2
   0  30  -2 5.22930 8.91579   1
   0  30   2 -4.7431 7.14839   2
   0  30   2 -5.5988 8.05453   1
   1 -30   2 163.275 21.0053   2
   1  30   2 130.264 19.1280   2
  -1  30  -2 163.449 21.8134   1
   2 -30   2 22.5488 10.4961   2
   2  30   2 78.4972 14.7934   2
   2  30   2 25.7069 8.96858   1
  -2  30  -2 32.4295 13.0192   1
   3 -30   2 12.0901 9.53512   2
  -3  30  -2 3.27751 9.51019   1
   3  30   2 2.05763 6.98838   2
   4 -30   2 -1.0662 9.16193   2
  -4  30  -2 18.5046 18.6794   1
   4  30   2 7.00520 9.07869   2
   5 -30   2 5.25940 9.66236   2
  -5  30  -2 6.78495 9.62526   1
   5  30   2 -2.5862 7.44196   2
   6 -30   2 4.89737 10.1191   2
   6  30   2 43.8553 11.6499   2
  -6  30  -2 1.91203 11.2013   1
   7 -30   2 0.77982 8.77602   2
   7  30   2 -4.2718 8.08377   2
  -7  30  -2 1.90104 13.6990   1
   6 -31  -2 46.5446 13.9543   2
   6  31  -2 31.9835 10.5605   2
  -6  31   2 71.4890 18.4683   1
   5 -31  -2 43.1817 14.6684   2
  -5  31   2 36.9282 14.9793   1
   5  31  -2 54.1730 14.3024   2
   4 -31  -2 67.0875 14.9983   2
  -4  31   2 101.144 20.7326   1
   4  31  -2 116.097 18.9636   2
   3 -31  -2 31.7055 12.7706   2
   3  31  -2 60.2798 15.6471   2
  -3  31   2 49.0499 14.8010   1
   2 -31  -2 42.3937 11.9834   2
   2  31  -2 43.9846 12.9097   2
  -2  31   2 23.9754 12.1756   1
   2  31  -2 60.2340 12.8860   1
   1 -31  -2 7.88762 7.24638   2
  -1  31   2 3.28228 9.23011   1
   1  31  -2 -14.021 14.5809   1
   1  31  -2 10.9380 9.43982   2
   0 -31   2 6.55026 9.97074   2
   0  31   2 16.0143 9.14888   2
   0  31  -2 11.5062 8.43794   2
   0  31   2 10.0209 9.20441   1
   0  31  -2 21.5790 10.4448   1
   1 -31   2 23.6559 11.1877   2
   1  31   2 34.3082 12.1574   2
   1  31   2 34.7427 11.4148   1
  -1  31  -2 33.9759 11.6974   1
   2 -31   2 -3.3784 8.97205   2
   2  31   2 -5.2134 6.93623   2
   2  31   2 -9.8367 8.11145   1
  -2  31  -2 -12.913 8.85045   1
   3 -31   2 24.4598 10.6553   2
   3  31   2 8.18867 8.89393   2
   4 -31   2 2.14496 8.25708   2
   4  31   2 0.09117 8.95681   2
  -4  31  -2 -7.6272 9.58403   1
   5 -31   2 9.56524 9.36344   2
  -5  31  -2 14.9157 13.4743   1
   5  31   2 2.05796 8.08571   2
   4 -32  -2 13.8495 9.92133   2
   4  32  -2 -9.7417 8.03143   2
  -4  32   2 7.36209 10.4685   1
   3 -32  -2 28.9874 13.2104   2
   3  32  -2 46.5927 12.0256   2
  -3  32   2 29.2145 12.6370   1
   2 -32  -2 13.0852 9.62256   2
   2  32  -2 0.28575 8.43483   2
  -2  32   2 10.8540 10.4145   1
   1 -32  -2 22.1077 9.12944   2
  -1  32   2 33.2452 13.8101   1
   1  32  -2 10.2397 8.29428   2
  -1  32   2 25.5515 12.5303   2
   0  32  -2 5.01811 7.86565   2
   0  32   2 -1.0959 8.63949   2
   0  32  -2 8.82988 12.5835   1
   1 -32   2 23.6436 11.2892   2
  -1  32  -2 25.2778 12.4328   1
   1  32   2 12.4266 10.3738   2
   1  32   2 -16.425 9.54667   1
   2 -32   2 9.00558 9.36989   2
   2  32   2 5.48064 8.03083   2
   3 -32   2 -1.7162 9.16738   2
   3  32   2 14.0697 9.56305   2
  -3  32  -2 0.23491 11.0122   1
   4 -32   2 56.3557 14.8616   2
  -4  32  -2 75.4511 17.5457   1
   4  32   2 69.1048 15.4500   2
   1  33  -2 15.0752 11.7094   1
   0  33   2 -5.7123 8.00349   2
   0  33  -2 -2.2719 9.40127   2
 -17   0   3 4.59783 11.6042   1
  17   0  -3 8.04528 8.51442   2
  16   0  -3 -2.2000 10.5604   2
 -16   0   3 6.45519 8.30200   1
  15   0  -3 108.938 15.9914   2
 -15   0   3 98.5305 14.3000   1
 -14   0   3 4.34184 5.70260   1
  14   0  -3 4.29325 5.03815   2
 -13   0   3 67.8602 15.6770   1
  13   0  -3 78.8123 10.9360   2
  12   0  -3 -1.9569 3.20407   2
 -12   0   3 3.42577 4.66072   1
  11   0  -3 248.042 17.8005   2
 -11   0   3 235.788 16.6839   1
  10   0  -3 2.09025 2.36436   2
 -10   0   3 3.06067 3.44738   1
  -9   0   3 15.9835 4.48674   1
   9   0  -3 16.8986 4.90033   2
   8   0  -3 -1.2029 1.48880   2
  -8   0   3 1.62236 2.20732   1
   7   0  -3 1.99616 2.52318   2
  -7   0   3 4.10789 2.32036   1
   6   0  -3 -0.7302 1.92863   1
  -6   0   3 -1.5673 1.49148   1
  -5   0   3 591.469 23.6598   1
   5   0  -3 588.819 23.9800   2
  -5   0   3 576.404 23.7849   2
  -4   0   3 1.31408 1.28517   2
   4   0  -3 -0.0633 0.81383   2
   4   0  -3 -0.0063 1.22041   1
  -4   0   3 1.59527 1.27009   1
  -3   0   3 578.887 21.1369   2
   3   0  -3 594.939 21.2590   2
   3   0  -3 511.571 21.0997   1
  -3   0   3 574.851 21.4598   1
   2   0  -3 -0.1540 0.80475   1
  -2   0   3 -0.3340 0.48719   2
   2   0  -3 0.03791 0.56000   2
  -2   0   3 -0.1307 0.68311   1
   1   0  -3 344.643 13.3184   1
  -1   0   3 327.451 13.2169   1
   1   0  -3 366.211 12.0061   2
  -1   0   3 354.409 11.9284   2
   0   0   3 0.65544 0.57781   2
   0   0   3 1.40549 0.82120   1
   0   0  -3 0.13810 0.50126   1
   0   0  -3 0.06451 0.29630   2
   1   0   3 73.6830 3.84200   2
  -1   0  -3 74.0854 3.81624   2
  -1   0  -3 72.8398 4.33454   1
   1   0   3 76.0115 4.41855   1
  -2   0  -3 0.20099 0.74592   2
   2   0   3 0.26686 0.68383   2
  -2   0  -3 3.45984 1.31373   1
   2   0   3 -0.0738 0.90817   1
  -3   0  -3 90.1489 6.13337   2
   3   0   3 95.6134 6.12994   1
  -3   0  -3 90.0545 5.96723   1
   3   0   3 93.4446 5.95928   2
  -4   0  -3 1.40957 1.40360   1
   4   0   3 -0.3529 0.96236   2
  -4   0  -3 -0.0473 1.03788   2
   5   0   3 375.493 17.6973   2
  -5   0  -3 367.155 17.3860   1
  -5   0  -3 360.330 16.7590   1
  -6   0  -3 -0.8908 2.14810   1
  -6   0  -3 -1.2625 2.05001   1
   6   0   3 2.87180 1.90810   2
  -7   0  -3 2251.02 82.0552   1
   7   0   3 2332.87 83.1185   2
   8   0   3 -0.9491 2.08127   2
  -8   0  -3 0.68521 2.29088   1
   9   0   3 167.428 13.8220   2
  -9   0  -3 170.221 12.9718   1
  10   0   3 -1.7097 3.26999   2
 -10   0  -3 3.99549 3.83019   1
  11   0   3 87.3273 11.5349   2
 -11   0  -3 102.609 11.5131   1
 -12   0  -3 -8.3251 4.18163   1
  12   0   3 3.22211 4.55595   2
  13   0   3 29.5191 8.35956   2
 -14   0  -3 -3.2528 7.63124   1
  14   0   3 -1.1079 4.89755   2
 -15   0  -3 69.4025 13.5459   1
  15   0   3 56.3602 12.3861   2
  16   0   3 1.15296 8.52574   2
 -16   0  -3 -6.9533 9.50279   1
  17   0   3 2.81412 9.60363   2
 -17   0  -3 -0.1791 16.3009   1
 -17  -1   3 124.999 22.8197   1
  17  -1  -3 83.8323 17.0119   2
 -17   1   3 111.745 26.4683   1
  17   1  -3 113.924 17.2403   2
  16  -1  -3 118.059 24.1238   2
 -16  -1   3 121.185 17.6597   1
  16   1  -3 112.931 22.2869   2
 -16   1   3 145.893 18.4508   1
 -15  -1   3 174.298 17.0653   1
  15  -1  -3 151.869 18.3785   2
 -15   1   3 189.137 18.3921   1
  15   1  -3 160.047 18.6611   2
 -14  -1   3 91.8854 13.1271   1
  14  -1  -3 105.622 13.8543   2
 -14   1   3 118.061 14.1116   1
  14   1  -3 70.3699 11.9507   2
  13  -1  -3 76.8324 10.9412   2
  13   1  -3 67.7523 10.5019   2
 -13   1   3 63.5309 11.2002   1
 -12  -1   3 189.281 14.4554   1
  12  -1  -3 175.848 15.2639   2
  12   1  -3 181.061 15.3710   2
 -12   1   3 160.541 14.7918   1
  11  -1  -3 89.8240 10.4963   2
 -11  -1   3 76.6844 9.14665   1
 -11   1   3 78.8774 9.83381   1
  11   1  -3 68.9607 9.32105   2
 -10  -1   3 274.380 16.7845   1
  10  -1  -3 286.812 18.3284   2
  10   1  -3 311.059 18.8028   2
 -10   1   3 263.062 17.3344   1
   9  -1  -3 290.474 18.0943   2
  -9  -1   3 323.778 19.1532   1
   9   1  -3 318.343 18.7376   2
  -9   1   3 301.309 17.7680   1
   8  -1  -3 46.6394 6.43648   2
  -8  -1   3 42.2007 5.73947   1
   8   1  -3 36.3788 5.49282   2
  -8   1   3 54.0154 6.86598   1
  -7  -1   3 120.698 8.72343   1
   7  -1  -3 128.549 9.59210   2
  -7   1   3 115.983 9.25013   1
   7   1  -3 115.915 9.09428   2
   7   1  -3 122.986 8.89968   1
  -6  -1   3 56.9563 5.52140   1
   6  -1  -3 55.0510 6.18759   1
  -6   1   3 58.8341 6.08573   1
   6   1  -3 61.7001 7.11099   2
   6   1  -3 53.5634 5.31699   1
  -5  -1   3 60.8400 5.46051   2
   5  -1  -3 66.3156 6.04880   1
  -5  -1   3 67.1140 5.45631   1
   5  -1  -3 63.8936 5.52357   2
   5   1  -3 65.8164 5.58427   2
  -5   1   3 51.6456 5.08652   2
  -5   1   3 57.6035 5.81427   1
   5   1  -3 68.7763 5.46411   1
   4  -1  -3 553.407 22.1885   1
  -4  -1   3 531.653 21.0244   1
  -4  -1   3 531.487 21.4993   2
   4  -1  -3 575.101 21.7338   2
  -4   1   3 513.690 21.8343   1
   4   1  -3 569.078 21.8116   2
  -4   1   3 562.984 21.5921   2
   4   1  -3 534.761 21.0182   1
  -3  -1   3 33.1012 2.98131   1
   3  -1  -3 30.2197 3.47754   1
   3  -1  -3 36.2659 3.00044   2
   3   1  -3 31.1004 2.81930   1
  -3   1   3 32.9916 3.51178   1
  -3   1   3 31.5179 2.93572   2
   3   1  -3 26.6983 2.87408   2
  -2  -1   3 295.879 11.7212   1
   2  -1  -3 306.043 12.4936   1
   2  -1  -3 305.389 11.3709   2
  -2  -1   3 295.681 11.4761   2
   2   1  -3 282.022 11.6157   1
  -2   1   3 276.266 12.1743   1
  -2   1   3 309.152 11.3651   2
   2   1  -3 297.147 11.4725   2
  -1  -1   3 307.748 12.7079   1
   1  -1  -3 366.322 11.7642   2
   1  -1  -3 332.401 13.2547   1
  -1  -1   3 337.402 12.0250   2
   1   1  -3 310.247 12.7172   1
  -1   1   3 390.905 11.8214   2
   1   1  -3 326.523 11.9790   2
  -1   1   3 338.789 13.2659   1
   0  -1   3 1.06336 0.52231   2
   0  -1  -3 0.42394 0.62969   1
   0  -1  -3 0.83787 0.35114   2
   0  -1   3 -0.2303 0.55190   1
   0   1  -3 0.93349 0.81518   1
   0   1  -3 1.24396 0.50555   2
   0   1   3 1.04654 0.39702   2
   0   1   3 0.04228 0.53317   1
   1  -1   3 560.276 20.3699   2
  -1  -1  -3 602.414 20.3908   2
   1  -1   3 577.921 21.3855   1
  -1  -1  -3 574.568 20.7775   1
   1   1   3 591.296 20.3749   2
  -1   1  -3 557.027 21.2549   1
  -1   1  -3 546.065 20.2730   2
   1   1   3 600.538 20.8478   1
  -2  -1  -3 103.642 5.86758   2
   2  -1   3 117.655 6.59998   1
   2  -1   3 99.8043 5.80986   2
  -2  -1  -3 116.923 6.00622   1
  -2   1  -3 109.669 6.42351   1
   2   1   3 112.193 5.96728   2
  -2   1  -3 109.671 5.88806   2
   2   1   3 116.017 5.98359   1
  -3  -1  -3 1816.40 65.0512   2
  -3  -1  -3 1932.45 64.4402   1
   3  -1   3 1984.54 65.7704   1
   3  -1   3 1914.09 65.1316   2
   3   1   3 1884.65 65.0511   2
  -3   1  -3 1802.94 64.7645   2
   3   1   3 1909.61 64.4810   1
  -3   1  -3 1882.06 65.2914   1
  -4  -1  -3 39.4159 4.10162   1
  -4  -1  -3 26.2520 3.72416   2
   4  -1   3 32.5922 3.94012   2
  -4  -1  -3 35.5456 3.97254   1
  -4   1  -3 37.2937 4.62129   1
  -4   1  -3 31.2505 3.81325   2
   4   1   3 34.7158 3.66314   1
   4   1   3 31.9905 3.83761   2
  -4   1  -3 27.1343 4.10777   1
  -5  -1  -3 122.061 8.32553   1
   5  -1   3 131.713 9.27321   2
  -5  -1  -3 125.809 7.90594   1
  -5   1  -3 123.229 8.65308   1
  -5   1  -3 126.925 9.07015   1
   5   1   3 127.519 8.94896   2
  -6  -1  -3 635.168 26.8973   1
  -6  -1  -3 639.238 26.1610   1
   6  -1   3 643.660 28.0298   2
  -6   1  -3 637.597 28.0374   1
   6   1   3 654.943 27.9292   2
  -7  -1  -3 724.749 31.1223   1
   7  -1   3 773.072 32.9597   2
   8  -1   3 262.524 16.5590   2
  -8  -1  -3 255.725 15.2085   1
   8   1   3 254.625 16.3648   2
  -8   1  -3 243.853 15.7536   1
   9  -1   3 66.8271 9.05944   2
  -9  -1  -3 63.9771 8.04633   1
   9   1   3 59.5905 8.66519   2
  -9   1  -3 65.5670 8.41025   1
 -10  -1  -3 58.8837 8.44093   1
  10  -1   3 41.7159 7.80333   2
  10   1   3 42.9079 8.13256   2
 -10   1  -3 38.0177 8.32471   1
 -11  -1  -3 495.894 26.7412   1
  11  -1   3 526.074 29.5077   2
  11   1   3 543.018 29.8628   2
 -11   1  -3 542.197 28.4668   1
  12  -1   3 107.268 13.6284   2
  12   1   3 101.415 12.8247   2
 -12   1  -3 117.300 13.3632   1
 -13  -1  -3 10.2003 6.38995   1
  13  -1   3 3.78492 5.23514   2
  13   1   3 17.0799 6.62063   2
 -14  -1  -3 2.42357 7.65823   1
  14  -1   3 3.61537 5.23746   2
 -14   1  -3 5.53556 6.99435   1
  14   1   3 -3.7786 5.08843   2
  15  -1   3 21.1528 8.56375   2
 -15  -1  -3 16.2286 10.5094   1
  15   1   3 18.0333 7.73614   2
 -15   1  -3 20.3147 10.0730   1
  16  -1   3 186.937 22.2884   2
  16   1   3 162.830 20.8405   2
 -16   1  -3 195.490 22.9790   1
  17  -1   3 -2.3188 8.47104   2
 -17   1  -3 -9.0643 14.5358   1
  17   1   3 2.19351 8.85741   2
  17  -2  -3 103.577 19.1488   2
 -17   2   3 126.416 22.0728   1
  17   2  -3 120.661 17.4765   2
  16  -2  -3 69.8773 19.3584   2
 -16  -2   3 48.4204 11.6269   1
 -16   2   3 59.2608 13.5261   1
  16   2  -3 40.1540 12.3525   2
 -15  -2   3 4.40316 6.40019   1
  15  -2  -3 -2.6052 5.90782   2
  15   2  -3 15.6486 8.68710   2
 -15   2   3 9.75860 7.82303   1
  14  -2  -3 21.1374 7.25768   2
 -14  -2   3 14.5591 6.88369   1
 -14   2   3 20.4911 7.66949   1
  14   2  -3 24.3672 8.12300   2
  13  -2  -3 289.685 21.4702   2
  13   2  -3 341.789 22.7546   2
 -13   2   3 320.525 22.0461   1
  12  -2  -3 2.66080 4.01968   2
  12   2  -3 -3.2458 3.70335   2
 -12   2   3 5.90245 5.16166   1
  11  -2  -3 131.558 12.7716   2
 -11  -2   3 117.609 10.7556   1
  11   2  -3 125.948 12.7333   2
 -11   2   3 134.036 12.5040   1
  10  -2  -3 45.7213 6.89813   2
 -10  -2   3 33.0800 7.41386   1
 -10   2   3 28.8647 6.82888   1
  10   2  -3 47.1393 7.41212   2
   9  -2  -3 799.830 35.8873   2
  -9  -2   3 848.530 33.6505   1
  -9   2   3 768.930 35.3383   1
   9   2  -3 805.934 35.8752   2
   8  -2  -3 50.1243 6.42104   2
  -8  -2   3 55.5252 5.75720   1
   8   2  -3 43.7016 5.90834   2
  -8   2   3 44.2631 6.18755   1
   8   2  -3 46.8136 6.21610   1
  -7  -2   3 791.150 30.9732   1
   7  -2  -3 786.644 32.9103   2
   7   2  -3 757.151 30.8030   1
   7   2  -3 806.496 33.1578   2
  -7   2   3 796.182 33.5462   1
  -6  -2   3 153.004 9.02732   1
   6  -2  -3 146.751 11.1734   2
  -6   2   3 163.150 10.8089   1
   6   2  -3 166.472 10.2607   2
   6   2  -3 155.651 8.96529   1
   5  -2  -3 1416.59 53.3176   1
   5  -2  -3 1469.72 52.7724   2
  -5  -2   3 1428.22 51.0597   1
  -5   2   3 1450.34 53.4880   1
   5   2  -3 1555.06 53.1811   2
   5   2  -3 1425.74 51.1416   1
  -5   2   3 1535.18 53.2392   2
   4  -2  -3 0.58216 1.00999   2
  -4  -2   3 2.80262 1.57546   2
   4  -2  -3 4.80733 2.04378   1
  -4  -2   3 3.28682 1.28129   1
  -4   2   3 2.13329 1.30696   2
   4   2  -3 1.54201 1.23965   1
   4   2  -3 1.08163 1.20571   2
  -4   2   3 -0.4643 1.43845   1
   3  -2  -3 6303.87 199.494   2
  -3  -2   3 6152.67 198.596   1
   3  -2  -3 6020.67 200.553   1
  -3  -2   3 6154.46 199.595   2
  -3   2   3 6050.41 200.592   1
   3   2  -3 5920.15 198.506   1
  -3   2   3 6091.96 199.289   2
   3   2  -3 6053.50 199.547   2
  -2  -2   3 2894.17 100.707   1
  -2  -2   3 3018.14 101.150   2
   2  -2  -3 3083.72 102.365   1
   2  -2  -3 3293.41 100.995   2
   2   2  -3 2966.32 100.766   1
   2   2  -3 3043.63 101.164   2
  -2   2   3 3004.26 102.365   1
  -2   2   3 3245.62 100.971   2
   1  -2  -3 19.3151 2.32975   1
  -1  -2   3 15.4514 1.82992   1
  -1  -2   3 16.6119 1.72418   2
   1  -2  -3 20.5123 1.54173   2
  -1   2   3 20.5773 1.57911   2
  -1   2   3 15.0094 2.15858   1
   1   2  -3 16.9980 1.83759   1
   1   2  -3 16.3047 1.64899   2
   0  -2  -3 1840.50 59.1404   1
   0  -2   3 1735.73 58.3078   2
   0  -2   3 1669.14 59.1246   1
   0   2   3 1814.58 59.0922   1
   0   2   3 1821.37 58.0043   2
   0   2   3 1776.92 57.9824   2
   0   2  -3 1691.04 58.1953   2
   0   2  -3 1734.30 59.1835   1
   1  -2   3 8.04844 1.57276   2
  -1  -2  -3 8.38407 1.39451   2
  -1  -2  -3 7.45264 1.51394   1
   1  -2   3 11.7451 2.45023   1
   1   2   3 8.90245 1.55642   1
  -1   2  -3 6.04460 1.67552   1
   1   2   3 10.2996 1.57380   2
  -1   2  -3 10.8079 1.59193   2
  -2  -2  -3 996.008 33.2765   1
   2  -2   3 928.107 33.8755   2
  -2  -2  -3 923.524 33.7478   2
   2  -2   3 953.802 34.8924   1
  -2   2  -3 930.575 34.6553   1
   2   2   3 946.532 33.7854   2
   2   2   3 1019.78 33.3635   1
  -2   2  -3 926.815 33.7145   2
  -3  -2  -3 79.6281 5.55126   2
  -3  -2  -3 77.5325 4.96354   1
   3  -2   3 80.6866 5.66415   2
  -3   2  -3 77.8562 6.92592   1
   3   2   3 84.3364 5.74218   2
  -3   2  -3 72.7421 5.30501   2
   3   2   3 85.9113 5.12417   1
  -3   2  -3 84.5441 6.52834   1
   4  -2   3 195.160 10.6731   2
  -4  -2  -3 200.435 9.61846   1
  -4  -2  -3 176.143 10.4001   2
   4   2   3 207.295 10.7848   2
  -4   2  -3 190.085 10.8665   1
  -4   2  -3 186.134 13.8031   2
  -4   2  -3 186.085 11.3551   1
   4   2   3 203.578 9.76711   1
  -5  -2  -3 14.7108 3.18974   1
  -5  -2  -3 16.1602 2.92996   1
  -5   2  -3 12.5946 3.26371   1
   5   2   3 21.4089 5.12336   2
  -6  -2  -3 84.5381 6.95505   1
  -6  -2  -3 92.2071 6.95365   1
   6   2   3 89.2918 7.90160   2
  -6   2  -3 92.8980 8.40579   1
   7  -2   3 292.090 16.9791   2
  -7  -2  -3 300.984 14.7739   1
  -7  -2  -3 277.583 14.9949   1
   7   2   3 279.185 16.3409   2
  -7   2  -3 279.676 16.8868   1
  -8  -2  -3 522.112 24.4942   1
  -8   2  -3 539.844 26.7419   1
   8   2   3 568.849 27.0761   2
   9  -2   3 12.8067 5.08022   2
  -9  -2  -3 12.7733 5.40147   1
   9   2   3 10.7864 4.24685   2
  -9   2  -3 16.0106 5.39299   1
  10  -2   3 313.761 20.0510   2
 -10  -2  -3 258.044 16.5474   1
  10   2   3 289.995 19.3112   2
 -10   2  -3 277.114 19.0000   1
 -11  -2  -3 39.7003 8.28176   1
  11  -2   3 53.4166 10.7163   2
 -11   2  -3 56.7601 9.38249   1
  11   2   3 34.5784 8.46216   2
  12  -2   3 186.720 17.3566   2
  12   2   3 204.414 17.5383   2
 -12   2  -3 171.403 16.4578   1
 -13  -2  -3 34.2123 8.05504   1
  13  -2   3 23.7869 6.94967   2
  13   2   3 31.6971 9.30866   2
 -13   2  -3 21.5819 8.59261   1
 -14  -2  -3 4.49146 7.33849   1
  14  -2   3 6.73019 6.45388   2
  14   2   3 -1.9472 5.43338   2
  15  -2   3 132.067 18.6316   2
 -15  -2  -3 174.580 17.7465   1
 -15   2  -3 139.548 18.5872   1
  15   2   3 143.056 18.6091   2
  16  -2   3 12.9277 9.86188   2
 -16  -2  -3 1.35530 11.5937   1
  16   2   3 18.7255 8.79849   2
 -16   2  -3 22.4722 10.5776   1
  17  -2   3 9.32098 8.68133   2
 -17   2  -3 -2.8491 13.2360   1
  17   2   3 -14.887 7.42853   2
  17  -3  -3 25.3964 11.0659   2
 -17   3   3 11.6973 10.8351   1
  17   3  -3 23.1261 9.07855   2
 -16  -3   3 91.0326 16.5370   1
  16  -3  -3 93.1484 18.7366   2
 -16   3   3 100.484 18.4143   1
  16   3  -3 76.4923 14.4526   2
  15  -3  -3 279.062 23.8082   2
 -15  -3   3 280.323 19.0372   1
  15   3  -3 273.767 22.7035   2
 -15   3   3 288.643 23.3181   1
 -14  -3   3 185.745 15.8906   1
  14  -3  -3 217.886 20.1208   2
 -14   3   3 183.312 18.1392   1
  14   3  -3 248.215 19.9347   2
 -13  -3   3 210.064 15.9142   1
  13  -3  -3 229.133 18.7588   2
  13   3  -3 232.494 18.7178   2
 -13   3   3 276.236 20.5264   1
  12  -3  -3 13.1787 3.85761   2
 -12  -3   3 11.1216 5.06457   1
  12   3  -3 5.30743 4.73332   2
 -12   3   3 14.0016 6.17028   1
 -11  -3   3 199.589 13.0031   1
  11  -3  -3 184.558 15.1741   2
 -11   3   3 185.517 15.2871   1
  11   3  -3 154.136 14.3651   2
  10  -3  -3 464.899 24.7186   2
 -10  -3   3 450.631 21.3957   1
 -10   3   3 428.774 24.1144   1
  10   3  -3 436.800 24.2737   2
  -9  -3   3 79.4249 7.55914   1
   9  -3  -3 126.607 10.7100   2
  -9   3   3 92.8493 9.89449   1
   9   3  -3 92.7277 9.52151   2
   9   3  -3 92.0288 8.47048   1
   8  -3  -3 302.293 16.7308   2
  -8  -3   3 267.866 13.8821   1
  -8   3   3 253.552 16.4515   1
   8   3  -3 258.637 13.9475   1
  -7  -3   3 1.61956 1.81099   1
   7  -3  -3 1.76124 1.61670   2
  -7   3   3 2.17389 2.09261   1
   7   3  -3 -0.8035 1.46173   2
   6  -3  -3 273.001 14.0462   2
  -6  -3   3 241.300 11.7803   1
   6   3  -3 243.157 11.7510   1
   6   3  -3 256.715 13.8699   2
  -6   3   3 250.806 14.5735   1
   5  -3  -3 355.411 17.4517   1
   5  -3  -3 356.373 16.4115   2
  -5  -3   3 343.277 14.5393   1
   5   3  -3 344.459 14.6144   1
   5   3  -3 366.832 16.7176   2
  -5   3   3 373.464 17.7496   1
  -4  -3   3 3328.38 110.165   1
  -4  -3   3 3380.79 112.490   2
   4  -3  -3 3456.62 112.312   2
   4  -3  -3 3317.82 113.585   1
   4   3  -3 3151.08 110.095   1
   4   3  -3 3344.88 112.457   2
  -4   3   3 3367.90 113.724   1
  -4   3   3 3395.18 112.094   2
  -3  -3   3 218.591 10.2505   2
   3  -3  -3 227.853 10.1126   2
   3  -3  -3 214.576 12.6271   1
  -3  -3   3 218.933 9.00828   1
   3   3  -3 219.112 10.2958   2
   3   3  -3 214.891 8.91960   1
  -3   3   3 208.373 11.0501   1
  -3   3   3 215.016 9.98508   2
  -2  -3   3 4.79044 1.17179   1
   2  -3  -3 2.92360 1.04266   2
   2  -3  -3 4.43865 2.06452   1
  -2  -3   3 1.61186 0.85831   2
  -2   3   3 2.02373 1.50973   1
   2   3  -3 3.09978 1.21025   2
   2   3  -3 3.69961 1.00882   1
  -2   3   3 3.27668 1.07854   2
   1  -3  -3 1776.99 59.8032   1
  -1  -3   3 1683.08 58.6794   1
  -1  -3   3 1727.37 58.8093   2
   1  -3  -3 1862.93 58.4304   2
   1   3  -3 1616.87 58.5218   1
  -1   3   3 1873.66 58.4222   2
  -1   3   3 1761.26 59.7063   1
   1   3  -3 1719.35 58.7707   2
   0  -3   3 16.9171 2.28155   1
   0  -3  -3 16.9929 1.84487   2
   0  -3   3 15.9850 1.98539   2
   0  -3  -3 22.4646 2.44583   1
   0   3  -3 18.5664 2.40423   1
   0   3   3 17.0784 2.13408   1
   0   3   3 18.3084 1.87686   2
   0   3  -3 14.7468 1.88643   2
  -1  -3  -3 165.000 7.31692   1
   1  -3   3 152.451 7.54158   2
  -1  -3  -3 167.012 7.50524   2
   1   3   3 175.143 7.55929   2
  -1   3  -3 161.375 8.41638   1
  -1   3  -3 134.393 7.23014   2
   1   3   3 176.741 7.38884   1
  -2  -3  -3 18.6862 2.42314   2
   2  -3   3 17.3713 2.57791   2
   2  -3   3 21.8531 3.16964   1
  -2  -3  -3 17.0908 2.13789   1
  -2   3  -3 18.0044 2.46236   2
   2   3   3 19.2441 2.46952   2
  -2   3  -3 19.9053 3.11788   1
   2   3   3 22.1461 2.17801   1
   3  -3   3 900.459 33.7259   2
  -3  -3  -3 926.680 33.7879   2
  -3  -3  -3 967.398 32.1670   1
   3   3   3 910.920 33.7134   2
   3   3   3 954.087 32.1662   1
  -3   3  -3 863.675 34.3432   1
  -3   3  -3 849.681 33.3605   2
  -3   3  -3 903.686 35.3987   1
   4  -3   3 344.450 16.0673   2
  -4  -3  -3 355.750 14.2952   1
   4   3   3 343.479 14.3287   1
  -4   3  -3 336.801 17.1695   1
  -4   3  -3 330.484 16.5217   1
   4   3   3 355.742 16.1671   2
  -5  -3  -3 619.636 24.3854   1
  -5  -3  -3 622.633 24.9067   1
   5  -3   3 651.813 27.0930   2
  -5   3  -3 650.102 28.2706   1
   5   3   3 657.115 27.5780   2
   6  -3   3 698.074 29.4245   2
  -6  -3  -3 650.151 26.7257   1
  -6  -3  -3 679.901 27.6856   1
   6   3   3 690.125 29.2953   2
  -6   3  -3 658.520 30.3375   1
  -7  -3  -3 -0.8774 2.31291   1
  -7  -3  -3 -2.0772 1.77312   1
   7  -3   3 12.1711 3.95815   2
   7   3   3 1.72938 1.53493   2
  -7   3  -3 5.32037 3.23199   1
  -8  -3  -3 22.8491 4.79500   1
   8  -3   3 19.0790 5.36971   2
  -8   3  -3 11.2575 4.80279   1
   8   3   3 22.4603 6.07270   2
  -9  -3  -3 1077.23 42.3397   1
   9  -3   3 1057.01 45.7142   2
  -9   3  -3 1075.01 46.2166   1
   9   3   3 1050.95 45.4592   2
 -10  -3  -3 32.2809 6.37159   1
  10  -3   3 40.5089 8.03643   2
 -10   3  -3 52.8170 8.40579   1
  10   3   3 36.9036 7.49554   2
  11  -3   3 350.925 22.8055   2
 -11  -3  -3 342.297 19.5615   1
 -11   3  -3 361.303 23.6301   1
  11   3   3 344.497 22.3985   2
 -12  -3  -3 7.64496 6.19687   1
  12  -3   3 1.84315 4.10737   2
  12   3   3 7.39691 5.91683   2
 -12   3  -3 3.59349 5.84127   1
 -13  -3  -3 7.16896 5.87356   1
  13  -3   3 6.83555 5.50451   2
 -13   3  -3 3.86149 6.39110   1
  13   3   3 -0.5871 4.70063   2
 -14  -3  -3 89.8264 13.5945   1
  14  -3   3 100.684 14.7815   2
  14   3   3 104.630 15.4875   2
 -14   3  -3 90.4183 14.4051   1
  15  -3   3 2.51104 7.82802   2
 -15  -3  -3 -0.3254 8.09372   1
 -15   3  -3 4.15931 8.95944   1
  15   3   3 3.30178 7.25203   2
  16  -3   3 -6.2315 6.98538   2
  16   3   3 12.2964 8.41674   2
 -16   3  -3 -3.3755 10.5786   1
  17  -3   3 14.1473 9.95757   2
 -17   3  -3 0.95313 14.3995   1
  17   3   3 22.3859 11.3463   2
  17  -4  -3 1.35167 8.89318   2
 -17   4   3 6.75234 11.8926   1
  17   4  -3 3.59853 7.95040   2
  16  -4  -3 33.8047 10.4087   2
  16   4  -3 16.0495 8.84019   2
 -16   4   3 19.4476 10.9005   1
  15  -4  -3 21.3672 9.11472   2
 -15  -4   3 13.3505 6.85417   1
  15   4  -3 11.9714 8.63713   2
 -14  -4   3 153.696 13.2583   1
  14  -4  -3 140.305 16.6355   2
  14   4  -3 181.422 17.4133   2
 -14   4   3 160.900 17.4729   1
  13  -4  -3 35.1965 8.22110   2
 -13  -4   3 24.1434 5.93300   1
  13   4  -3 15.1676 6.10814   2
 -13   4   3 53.6836 10.9665   1
  12  -4  -3 31.9620 7.95391   2
 -12  -4   3 14.9099 7.38733   1
 -12   4   3 19.1014 6.40132   1
  12   4  -3 9.38545 5.12230   2
 -11  -4   3 9.79842 3.74854   1
  11  -4  -3 7.14844 4.61511   2
  11   4  -3 6.72279 3.83612   2
 -11   4   3 8.00937 4.58879   1
  10  -4  -3 20.6252 5.48487   2
 -10  -4   3 10.9828 3.55298   1
 -10   4   3 24.8269 6.12186   1
  10   4  -3 24.2046 7.03653   2
   9  -4  -3 21.5335 6.03614   2
  -9  -4   3 10.6665 3.56693   1
   9   4  -3 5.60664 3.04861   2
  -9   4   3 24.3192 5.61474   1
   9   4  -3 16.3701 3.96875   1
  -8  -4   3 15.3354 3.63759   1
   8  -4  -3 24.3098 4.67390   2
   8   4  -3 20.6625 4.78892   2
  -8   4   3 19.5089 5.94294   1
   7  -4  -3 251.223 14.2509   2
  -7  -4   3 228.873 11.3541   1
   7   4  -3 220.065 11.4221   1
  -7   4   3 252.471 15.4805   1
   7   4  -3 236.940 14.1401   2
   6  -4  -3 304.798 15.7665   2
  -6  -4   3 310.781 13.1446   1
   6   4  -3 303.538 13.2927   1
   6   4  -3 308.678 15.9466   2
   5  -4  -3 211.714 11.4444   2
  -5  -4   3 198.794 9.00197   1
   5   4  -3 226.456 11.8002   2
   5   4  -3 199.053 9.16557   1
  -5   4   3 195.602 12.2562   1
   4  -4  -3 197.408 10.3605   2
  -4  -4   3 198.668 8.43997   1
   4  -4  -3 203.699 11.8240   1
  -4  -4   3 188.610 10.4234   2
  -4   4   3 204.584 10.5048   2
  -4   4   3 213.696 11.8677   1
   4   4  -3 211.047 10.7849   2
   4   4  -3 191.150 8.38655   1
   3  -4  -3 275.324 11.7571   2
  -3  -4   3 248.764 9.90248   1
   3  -4  -3 250.878 12.8434   1
  -3  -4   3 234.150 12.4640   2
  -3   4   3 256.099 12.9028   1
   3   4  -3 270.327 12.0195   2
   3   4  -3 241.299 9.88686   1
  -3   4   3 251.625 11.4409   2
   2  -4  -3 356.079 13.7742   2
  -2  -4   3 337.348 12.8299   1
   2  -4  -3 329.640 14.9223   1
  -2   4   3 346.892 13.6875   2
  -2   4   3 351.863 15.2067   1
   2   4  -3 324.908 13.9961   2
   2   4  -3 327.190 12.7100   1
   2   4  -3 319.176 13.9171   2
   1  -4  -3 182.532 9.24166   1
   1  -4  -3 202.854 8.48425   2
  -1  -4   3 188.208 8.45675   1
  -1  -4   3 182.294 8.68090   2
   1   4  -3 186.172 8.33328   1
   1   4  -3 166.608 8.47007   2
  -1   4   3 201.845 8.43964   2
  -1   4   3 185.566 9.27741   1
   0  -4  -3 444.687 16.2370   2
   0  -4   3 402.134 16.3364   2
   0  -4   3 406.814 16.7843   1
   0  -4  -3 450.231 16.7303   1
   0   4   3 448.199 16.6306   1
   0   4  -3 412.818 16.7560   1
   0   4   3 436.357 16.1453   2
   0   4  -3 385.910 16.1378   2
   1  -4   3 1450.47 52.8415   2
  -1  -4  -3 1509.36 52.7156   2
  -1  -4  -3 1645.48 52.4055   1
   1  -4   3 1536.95 54.0220   1
   1   4   3 1572.61 52.7581   2
  -1   4  -3 1466.95 52.6965   2
   1   4   3 1580.13 52.7931   2
   1   4   3 1573.42 52.1777   1
   2  -4   3 475.306 19.1365   2
  -2  -4  -3 512.710 17.7619   1
  -2  -4  -3 442.936 18.7660   2
   2   4   3 481.208 18.9696   2
  -2   4  -3 437.998 20.4916   2
  -2   4  -3 483.429 20.8545   1
   2   4   3 500.063 17.6383   1
  -2   4  -3 470.508 20.1927   1
  -3  -4  -3 2.09579 1.05914   1
   3  -4   3 3.77168 1.78463   2
  -3  -4  -3 0.02769 1.27106   2
   3   4   3 4.10235 1.76217   2
  -3   4  -3 -0.1904 1.50716   1
  -3   4  -3 2.59502 1.69461   2
   3   4   3 2.48684 1.05732   1
  -3   4  -3 5.32197 2.17931   1
   4  -4   3 39.4856 4.37672   2
  -4  -4  -3 33.3441 3.11048   1
   4   4   3 31.0001 3.96080   2
   4   4   3 27.9223 2.90124   1
  -4   4  -3 36.0865 5.07691   1
   5  -4   3 34.0078 4.70441   2
  -5  -4  -3 35.9041 3.54554   1
  -5  -4  -3 30.2183 3.50774   1
  -5   4  -3 31.4070 5.04636   1
   5   4   3 40.8076 4.90788   2
   6  -4   3 489.615 23.0922   2
  -6  -4  -3 482.347 19.6123   1
  -6  -4  -3 474.050 19.9137   1
  -6   4  -3 496.952 24.3818   1
   6   4   3 479.354 22.8187   2
  -7  -4  -3 30.6128 4.56645   1
   7  -4   3 26.8787 5.43413   2
  -7  -4  -3 33.3425 4.46059   1
  -7   4  -3 28.3613 6.33617   1
   7   4   3 31.1048 5.39356   2
   8  -4   3 26.3197 6.44450   2
  -8  -4  -3 23.2116 4.46875   1
   8   4   3 18.6370 4.43245   2
  -8   4  -3 17.8896 4.63274   1
  -9  -4  -3 118.732 9.26271   1
   9  -4   3 118.480 11.4986   2
  -9   4  -3 119.951 12.3006   1
   9   4   3 127.381 11.6889   2
  10  -4   3 303.002 20.1373   2
 -10  -4  -3 291.725 16.2892   1
  10   4   3 285.006 19.2385   2
 -10   4  -3 267.970 19.5454   1
 -11  -4  -3 552.631 25.6941   1
  11  -4   3 550.091 30.6788   2
 -11   4  -3 550.291 30.7582   1
  11   4   3 543.435 30.2797   2
 -12  -4  -3 12.0645 5.11952   1
  12  -4   3 -1.8669 4.30857   2
  12   4   3 -1.4463 4.52967   2
 -12   4  -3 12.8680 6.47633   1
 -13  -4  -3 131.716 12.6484   1
  13  -4   3 103.134 14.2745   2
  13   4   3 98.9711 14.0245   2
 -13   4  -3 109.775 16.8910   1
  14  -4   3 14.0665 7.62374   2
 -14  -4  -3 38.0573 9.20002   1
 -14   4  -3 56.9502 12.0159   1
  14   4   3 12.5664 7.85849   2
 -15  -4  -3 -8.8616 7.01391   1
  15  -4   3 -3.3716 10.2166   2
  15   4   3 -1.6202 7.81312   2
 -15   4  -3 -3.9601 8.73351   1
  16  -4   3 2.84390 9.38706   2
  16   4   3 18.4768 9.77016   2
 -16   4  -3 37.0246 12.6959   1
  17  -4   3 21.0436 9.84536   2
  17   4   3 20.9178 11.4237   2
 -17   4  -3 4.27983 12.0860   1
  17  -5  -3 -0.3292 8.66980   2
  17   5  -3 2.63346 10.6742   2
 -17   5   3 1.53206 10.0448   1
  16  -5  -3 155.505 19.4948   2
  16   5  -3 157.536 19.4336   2
 -16   5   3 170.969 21.6631   1
  15  -5  -3 119.762 16.3246   2
 -15   5   3 124.137 20.8743   1
  15   5  -3 118.855 15.2535   2
  14  -5  -3 105.966 14.6083   2
  14   5  -3 119.911 14.9525   2
 -14   5   3 106.408 15.1987   1
 -13  -5   3 80.9845 9.57228   1
  13  -5  -3 95.4282 12.7391   2
 -13   5   3 102.300 15.6477   1
  13   5  -3 96.8608 12.6105   2
 -12  -5   3 12.4400 4.50141   1
  12  -5  -3 18.5419 6.96063   2
  12   5  -3 9.08212 4.70012   2
 -12   5   3 13.7442 6.75484   1
  11  -5  -3 16.6996 4.38587   2
 -11   5   3 14.2058 6.68923   1
  11   5  -3 13.4299 7.05723   2
 -10  -5   3 51.0556 5.98430   1
  10  -5  -3 70.6650 8.56936   2
 -10   5   3 60.9178 9.63041   1
  10   5  -3 66.7618 8.69040   2
   9  -5  -3 39.9303 6.51828   2
  -9  -5   3 49.2934 5.25249   1
   9   5  -3 60.0799 7.85090   2
  -9   5   3 46.2733 8.07187   1
  -8  -5   3 53.2182 4.96497   1
   8  -5  -3 67.9783 7.36532   2
  -8   5   3 67.5158 8.69659   1
   8   5  -3 70.3448 7.71343   2
   8   5  -3 52.9192 5.47606   1
   7  -5  -3 871.713 35.4785   2
  -7  -5   3 844.430 30.7673   1
   7   5  -3 813.387 30.9656   1
   7   5  -3 897.173 36.0234   2
  -7   5   3 843.561 36.9951   1
  -6  -5   3 492.658 19.0877   1
   6  -5  -3 536.014 23.3127   2
   6   5  -3 540.531 23.5918   2
   6   5  -3 505.337 19.3749   1
  -6   5   3 510.477 24.8085   1
   5  -5  -3 2161.43 73.8455   2
  -5  -5   3 2058.56 69.4984   1
  -5   5   3 2108.64 75.7803   1
   5   5  -3 2064.38 69.7287   1
   4  -5  -3 1812.32 62.2322   2
  -4  -5   3 1841.82 62.7832   2
  -4  -5   3 1762.09 58.6725   1
  -4   5   3 1731.39 64.0092   1
  -4   5   3 1805.24 62.1797   2
   4   5  -3 1764.49 62.5503   2
   4   5  -3 1679.74 58.6898   1
   3  -5  -3 1724.39 61.2928   1
  -3  -5   3 1639.21 59.5582   2
   3  -5  -3 1737.42 59.3306   2
  -3  -5   3 1757.27 56.9310   1
  -3   5   3 1706.62 61.2333   1
   3   5  -3 1723.02 59.8059   2
  -3   5   3 1763.12 59.3099   2
   3   5  -3 1625.27 56.7477   1
   2  -5  -3 569.960 20.9364   2
  -2  -5   3 552.446 19.7441   1
   2  -5  -3 504.616 22.0937   1
  -2   5   3 508.601 21.9744   1
  -2   5   3 565.692 20.8727   2
   2   5  -3 517.585 19.4545   1
   2   5  -3 533.241 21.2128   2
   2   5  -3 555.072 21.3617   2
  -1  -5   3 1019.93 37.2597   1
   1  -5  -3 1115.17 37.5686   2
  -1  -5   3 1028.61 37.9406   2
   1  -5  -3 1071.93 38.6483   1
  -1   5   3 1125.13 37.5849   2
   1   5  -3 1021.90 37.7874   2
   1   5  -3 1069.54 37.2525   1
  -1   5   3 1071.91 38.5846   1
   0  -5   3 3568.94 122.019   1
   0  -5   3 3554.18 121.621   2
   0  -5  -3 3836.85 121.805   1
   0  -5  -3 3845.02 121.523   2
   0   5   3 3665.91 121.489   1
   0   5  -3 3402.15 121.298   2
   0   5  -3 3603.30 121.936   1
   0   5   3 3857.39 121.471   2
  -1  -5  -3 396.061 15.0282   1
   1  -5   3 384.453 16.6706   1
   1  -5   3 361.432 15.7110   2
   1   5   3 375.989 15.5724   2
  -1   5  -3 386.888 17.3733   1
  -1   5  -3 372.693 16.6186   1
  -1   5  -3 349.047 15.3580   2
   1   5   3 377.947 15.5741   2
   1   5   3 394.355 14.9160   1
  -2  -5  -3 4.52076 1.60066   2
   2  -5   3 4.00786 1.85143   2
  -2  -5  -3 3.48418 1.20931   1
  -2   5  -3 4.49058 2.03799   1
   2   5   3 3.41403 1.42051   2
  -2   5  -3 5.37818 1.68170   2
   2   5   3 4.46528 1.23598   1
  -2   5  -3 8.70003 2.92977   1
   3  -5   3 7.46772 2.17868   2
  -3  -5  -3 7.71717 1.68342   1
  -3  -5  -3 4.46357 1.75390   2
   3   5   3 7.82926 1.52103   1
  -3   5  -3 5.37081 2.13399   2
  -3   5  -3 2.71739 2.11097   1
  -3   5  -3 2.58001 1.70490   1
   3   5   3 4.71566 1.76878   2
  -4  -5  -3 35.3304 2.93334   1
   4  -5   3 29.6326 4.19064   2
   4   5   3 30.5388 4.10144   2
  -4   5  -3 26.2743 4.96669   1
   4   5   3 34.8823 2.98391   1
  -5  -5  -3 542.106 20.6143   1
  -5  -5  -3 534.850 20.1279   1
   5  -5   3 548.104 24.1143   2
  -5   5  -3 515.100 25.4925   1
  -6  -5  -3 55.0339 4.66102   1
   6  -5   3 56.2054 6.40209   2
  -6  -5  -3 58.9949 4.69553   1
  -6   5  -3 55.9796 7.66371   1
   6   5   3 75.4865 7.24978   2
  -7  -5  -3 1139.12 40.2570   1
  -7  -5  -3 1106.40 40.6104   1
   7  -5   3 1060.05 44.8931   2
   7   5   3 1116.38 45.1532   2
  -7   5  -3 1142.07 47.1223   1
  -8  -5  -3 183.645 10.4372   1
   8  -5   3 158.714 13.0156   2
   8   5   3 171.645 13.1338   2
  -8   5  -3 163.970 14.3940   1
   9  -5   3 1.22484 2.07515   2
  -9  -5  -3 4.30164 2.83592   1
   9   5   3 1.05333 2.69313   2
  -9   5  -3 2.53288 3.28336   1
  10  -5   3 410.207 24.5463   2
 -10  -5  -3 434.515 20.9262   1
  10   5   3 403.419 23.9357   2
 -10   5  -3 390.272 24.8444   1
  11  -5   3 55.4748 9.76787   2
 -11  -5  -3 66.0817 8.01384   1
 -11   5  -3 70.4664 11.9743   1
  11   5   3 29.3477 8.17038   2
  12  -5   3 191.181 17.6326   2
 -12   5  -3 163.686 17.2299   1
  12   5   3 148.435 15.1104   2
  13  -5   3 402.121 27.6826   2
 -13  -5  -3 388.880 21.0666   1
  13   5   3 397.693 26.7922   2
 -13   5  -3 402.623 27.1779   1
  14  -5   3 7.07596 6.51286   2
  14   5   3 -4.6222 5.10098   2
 -14   5  -3 5.98472 7.94810   1
  15  -5   3 50.6705 16.6418   2
 -15   5  -3 107.646 20.1436   1
  15   5   3 119.601 24.1661   2
  16  -5   3 51.3248 12.8787   2
 -16   5  -3 37.2443 11.9640   1
  16   5   3 51.5370 13.8732   2
  17  -5   3 27.9938 11.3320   2
  17   5   3 17.2334 9.59147   2
 -17   5  -3 9.37253 13.3518   1
  17  -6  -3 -18.247 7.80914   2
 -17   6   3 -14.242 9.83944   1
  17   6  -3 16.7248 8.16721   2
  16  -6  -3 18.7373 9.88830   2
 -16   6   3 53.6765 21.4012   1
  16   6  -3 1.46163 6.97537   2
  15  -6  -3 3.76872 7.13322   2
  15   6  -3 6.51393 5.39796   2
 -15   6   3 1.07697 8.32564   1
 -14  -6   3 85.2858 9.58982   1
  14  -6  -3 122.433 15.4618   2
 -14   6   3 104.589 15.6675   1
  14   6  -3 82.2622 14.1046   2
  13  -6  -3 85.9998 12.4365   2
 -13  -6   3 90.5571 8.37903   1
  13   6  -3 69.7246 10.9856   2
 -13   6   3 105.631 14.2469   1
  12  -6  -3 6.26920 4.88388   2
 -12  -6   3 4.76696 5.00112   1
 -12  -6   3 7.87947 3.60672   1
 -12   6   3 8.58972 5.99154   1
  12   6  -3 9.61169 5.24651   2
  11  -6  -3 237.050 24.6519   2
 -11  -6   3 263.206 13.2981   1
 -11  -6   3 259.442 13.9010   1
  11   6  -3 270.979 21.7334   2
 -11   6   3 291.376 20.3110   1
  10  -6  -3 134.676 12.0938   2
  10   6  -3 108.335 10.9923   2
 -10   6   3 120.854 12.8907   1
  -9  -6   3 687.704 26.4255   1
  -9  -6   3 721.701 26.5740   1
   9  -6  -3 739.571 33.4515   2
   9   6  -3 689.439 33.0865   2
  -9   6   3 721.873 34.9403   1
  -8  -6   3 1.33161 1.52311   1
  -8  -6   3 3.05241 1.67665   1
   8  -6  -3 0.92879 2.05225   2
   8   6  -3 1.10673 2.55931   2
  -8   6   3 4.06377 3.49808   1
   7  -6  -3 264.717 15.6491   2
  -7  -6   3 277.573 11.3866   1
   7   6  -3 279.959 11.8834   1
  -7   6   3 299.484 18.1489   1
   7   6  -3 294.912 16.6035   2
   6  -6  -3 1651.71 60.3595   2
  -6  -6   3 1652.39 54.5738   1
   6   6  -3 1606.86 60.4865   2
   6   6  -3 1648.21 54.8852   1
  -6   6   3 1627.87 62.5606   1
  -5  -6   3 217.247 9.23693   1
   5  -6  -3 214.459 12.6247   2
   5   6  -3 226.916 8.77535   1
   5   6  -3 228.118 12.7555   2
  -5   6   3 224.214 14.2014   1
  -4  -6   3 742.738 24.4332   1
   4  -6  -3 722.542 28.2276   2
   4   6  -3 712.874 28.5784   2
  -4   6   3 726.303 30.3574   2
  -4   6   3 709.078 30.0933   1
   4   6  -3 655.177 24.2492   1
   3  -6  -3 61.9462 5.13663   2
  -3  -6   3 53.1793 3.30544   1
   3  -6  -3 48.8297 5.76828   1
   3   6  -3 51.1717 4.90585   2
  -3   6   3 46.1243 4.55705   2
   3   6  -3 49.1068 4.74986   2
  -3   6   3 56.5940 5.78289   1
   3   6  -3 47.6488 3.11640   1
  -2  -6   3 3739.12 118.957   1
   2  -6  -3 3634.85 122.047   1
   2  -6  -3 3785.28 120.518   2
   2   6  -3 3513.91 118.602   1
  -2   6   3 3567.55 121.914   1
  -2   6   3 3639.10 123.000   2
   2   6  -3 3524.93 120.812   2
   2   6  -3 3438.95 120.755   2
   1  -6  -3 1685.28 56.2002   2
  -1  -6   3 1562.17 56.4896   2
  -1  -6   3 1602.51 55.7474   1
   1  -6  -3 1669.08 57.3213   1
   1   6  -3 1540.09 55.4914   1
  -1   6   3 1623.25 56.9346   1
  -1   6   3 1664.07 56.0689   2
   0  -6   3 64.0265 4.96655   1
   0  -6  -3 59.8501 4.60117   2
   0  -6  -3 60.7059 4.92061   1
   0  -6   3 62.9160 4.84077   2
   0   6   3 56.3527 4.47159   2
   0   6   3 70.8093 4.96155   1
   0   6  -3 50.8890 4.54309   1
   0   6  -3 50.9056 4.93955   1
  -1  -6  -3 471.252 17.6439   1
   1  -6   3 435.367 18.5437   2
  -1   6  -3 428.069 18.2304   2
   1   6   3 435.371 18.3108   2
  -1   6  -3 436.457 19.2168   1
   1   6   3 457.482 17.3909   1
   2  -6   3 6.44668 2.23828   2
  -2  -6  -3 12.1571 2.44492   2
  -2  -6  -3 5.24138 1.53902   1
  -2   6  -3 10.5796 2.83010   2
   2   6   3 5.57821 2.02649   2
  -2   6  -3 2.20954 2.05463   1
   2   6   3 7.12484 1.52694   1
   2   6   3 6.52665 2.29913   2
  -2   6  -3 2.60913 1.91917   1
  -3  -6  -3 152.560 7.00079   1
  -3  -6  -3 159.089 10.5789   2
   3  -6   3 138.535 8.93991   2
  -3   6  -3 133.081 10.0719   1
   3   6   3 160.577 6.97920   1
   3   6   3 153.803 9.06045   2
   4  -6   3 4.09446 3.81862   2
  -4  -6  -3 3.16143 1.25596   1
  -4   6  -3 4.64941 3.07766   1
   4   6   3 3.21712 1.59653   2
   4   6   3 6.66314 1.43415   1
  -5  -6  -3 106.542 5.65822   1
  -5  -6  -3 110.342 5.93758   1
   5  -6   3 105.598 8.59615   2
  -5   6  -3 105.241 10.0154   1
  -6  -6  -3 236.073 10.5301   1
  -6  -6  -3 232.713 10.8166   1
   6  -6   3 257.012 15.0287   2
  -6   6  -3 265.330 16.9208   1
   6   6   3 248.386 14.6120   2
  -7  -6  -3 2.81617 1.86888   1
  -7  -6  -3 4.93583 2.06243   1
   7  -6   3 6.01356 2.76433   2
  -7   6  -3 5.87951 3.51989   1
   7   6   3 -0.0066 1.95705   2
  -8  -6  -3 392.494 16.9173   1
   8  -6   3 393.596 21.7125   2
   8   6   3 367.356 21.2196   2
  -8   6  -3 384.656 22.9522   1
  -9  -6  -3 16.1645 4.06610   1
   9  -6   3 11.1862 4.41086   2
  -9  -6  -3 21.7804 4.56374   1
  -9   6  -3 28.3932 7.35134   1
   9   6   3 25.4395 6.55492   2
 -10  -6  -3 11.0858 4.32042   1
  10  -6   3 7.44074 3.71355   2
  10   6   3 3.94757 2.94325   2
 -10   6  -3 18.2185 7.03702   1
 -11  -6  -3 4.84951 4.91718   1
 -11  -6  -3 10.3964 4.08367   1
  11  -6   3 0.63820 4.35120   2
 -11   6  -3 6.49507 5.26829   1
  11   6   3 11.1159 5.37738   2
  12  -6   3 25.3467 8.86675   2
 -12  -6  -3 18.8721 5.02669   1
  12   6   3 30.2157 8.09988   2
 -12   6  -3 12.2660 7.42201   1
  13  -6   3 7.41081 7.03455   2
 -13  -6  -3 12.3903 5.34681   1
 -13   6  -3 11.1692 7.97304   1
  13   6   3 6.72295 6.02474   2
  14  -6   3 21.2714 9.31803   2
 -14  -6  -3 19.1676 6.61820   1
  14   6   3 37.4084 10.9374   2
 -14   6  -3 25.3246 9.76014   1
  15  -6   3 0.29136 8.81704   2
  15   6   3 4.79825 8.08810   2
  16  -6   3 35.0651 11.5976   2
 -16   6  -3 52.5958 16.3501   1
  16   6   3 51.3593 11.7895   2
  17  -7  -3 20.8771 10.1156   2
  17   7  -3 10.3939 8.73761   2
 -17   7   3 9.70459 11.4608   1
  16  -7  -3 86.2550 16.1933   2
  16   7  -3 77.1179 15.4044   2
  15  -7  -3 -9.4026 5.95231   2
 -15   7   3 3.79129 7.79150   1
  15   7  -3 4.27361 6.62488   2
  14  -7  -3 232.963 21.3106   2
 -14   7   3 268.309 23.0917   1
  14   7  -3 296.163 22.6366   2
  13  -7  -3 -2.1897 4.22814   2
 -13  -7   3 -0.6560 3.06657   1
  13   7  -3 -0.3428 5.14209   2
 -13   7   3 5.58321 5.90999   1
  12  -7  -3 494.837 29.3106   2
 -12  -7   3 482.507 19.4326   1
 -12   7   3 481.421 34.0662   1
  12   7  -3 577.589 30.6416   2
 -11  -7   3 56.3694 5.86128   1
 -11  -7   3 67.5042 5.27989   1
  11  -7  -3 75.9263 10.7376   2
 -11   7   3 72.2487 11.6496   1
  11   7  -3 73.7403 10.0503   2
  10  -7  -3 539.873 27.8068   2
 -10  -7   3 474.486 19.8977   1
 -10  -7   3 513.641 19.2469   1
 -10   7   3 517.356 29.1823   1
  10   7  -3 557.417 28.2285   2
  -9  -7   3 5.00251 1.89173   1
  -9  -7   3 4.37089 1.84801   1
   9  -7  -3 9.22193 4.08164   2
  -9   7   3 7.00772 4.55286   1
   9   7  -3 6.45310 3.29712   2
  -8  -7   3 600.471 21.5898   1
  -8  -7   3 623.762 21.7574   1
   8  -7  -3 652.115 29.6962   2
   8   7  -3 630.824 29.4164   2
  -8   7   3 615.031 31.0449   1
  -7  -7   3 436.799 15.3661   1
   7  -7  -3 458.824 22.2754   2
  -7   7   3 444.990 24.2245   1
   6  -7  -3 2974.58 105.297   2
   6   7  -3 3023.28 105.770   2
  -6   7   3 3059.04 108.223   1
   5  -7  -3 67.5953 6.09838   2
   5   7  -3 54.1420 5.58367   2
   5   7  -3 48.5815 2.56219   1
  -5   7   3 46.4541 6.50808   1
   4  -7  -3 11.9323 3.15996   2
  -4  -7   3 13.2724 1.64999   1
   4   7  -3 13.1122 1.58861   1
   4   7  -3 6.59988 2.08937   2
  -4   7   3 13.8405 4.13067   1
  -3  -7   3 233.201 9.31200   1
   3  -7  -3 229.878 11.5625   2
  -3   7   3 207.787 11.2989   2
   3   7  -3 215.977 11.8468   2
  -3   7   3 223.216 12.8943   1
   3   7  -3 208.985 8.96501   1
   3   7  -3 210.673 13.9639   2
   2  -7  -3 6573.25 218.848   1
  -2  -7   3 6455.02 217.644   2
  -2  -7   3 6651.10 215.406   1
   2  -7  -3 6763.54 217.222   2
  -2   7   3 6779.79 217.097   2
  -2   7   3 6436.77 218.635   1
   2   7  -3 6771.45 215.277   1
   2   7  -3 6295.48 217.427   2
   1  -7  -3 33.8615 4.38925   1
  -1  -7   3 37.7407 4.12610   2
   1  -7  -3 38.2489 3.89816   2
  -1   7   3 38.9539 4.02789   2
  -1   7   3 40.6479 4.41315   1
   1   7  -3 35.9320 3.72066   1
   1   7  -3 30.9812 3.61355   2
   1   7  -3 45.4456 4.50737   1
   0  -7   3 3.37366 1.35624   2
   0  -7  -3 -1.0534 0.81989   2
   0  -7  -3 -0.3658 1.26320   1
   0   7   3 1.32340 0.88439   1
   0   7  -3 -0.5601 1.32803   2
   0   7  -3 0.61089 0.89404   1
   0   7   3 2.07066 1.30449   2
  -1  -7  -3 38.2943 3.71674   1
  -1  -7  -3 38.8781 3.91476   2
   1  -7   3 32.3854 3.92162   2
   1   7   3 34.7942 3.91483   2
   1   7   3 32.9215 3.30146   1
  -1   7  -3 30.4569 3.92539   2
  -1   7  -3 36.3467 4.58683   1
   1   7   3 28.3230 3.73943   2
  -1   7  -3 33.6613 4.65983   1
   2  -7   3 105.290 7.28282   2
  -2  -7  -3 101.031 5.74188   1
   2   7   3 97.3657 6.97944   2
  -2   7  -3 97.4617 7.04908   2
   2   7   3 82.4712 6.57498   2
   2   7   3 103.674 5.60789   1
  -2   7  -3 96.5819 8.19591   1
  -2   7  -3 92.5074 8.85075   1
  -3  -7  -3 95.8598 5.34306   1
   3  -7   3 115.920 8.06413   2
   3   7   3 100.473 7.34408   2
   3   7   3 100.239 5.14721   1
  -3   7  -3 85.1713 8.39206   1
  -4  -7  -3 245.929 9.87378   1
   4  -7   3 233.662 13.4687   2
   4   7   3 245.440 13.4709   2
  -4   7  -3 237.882 15.2577   1
   4   7   3 243.494 9.75341   1
   5  -7   3 0.82477 1.55234   2
  -5  -7  -3 -0.4380 1.12759   1
   5   7   3 -0.0283 1.30428   2
  -5   7  -3 -2.3407 2.51356   1
   6  -7   3 6.90067 2.77077   2
  -6  -7  -3 3.41636 1.55202   1
  -6  -7  -3 4.23850 1.37355   1
   6   7   3 10.4638 3.44846   2
  -6   7  -3 6.69488 3.58637   1
   7  -7   3 340.454 19.3060   2
  -7  -7  -3 322.037 13.0932   1
  -7  -7  -3 329.256 13.3521   1
  -7   7  -3 347.720 20.9293   1
   7   7   3 304.744 18.2836   2
  -8  -7  -3 30.8596 3.75695   1
  -8  -7  -3 23.2509 3.59939   1
   8  -7   3 15.6265 5.48969   2
   8   7   3 21.6852 6.43193   2
  -8   7  -3 28.8734 7.25873   1
   9  -7   3 7.66644 4.76417   2
  -9   7  -3 7.89495 5.08791   1
   9   7   3 4.97684 4.09620   2
  10  -7   3 20.1503 7.06238   2
 -10  -7  -3 19.0596 4.10991   1
 -10   7  -3 25.2235 8.09314   1
  11  -7   3 -1.2022 3.83228   2
 -11   7  -3 -2.9779 4.23101   1
  11   7   3 1.30241 2.99686   2
 -12  -7  -3 17.0765 4.30465   1
  12  -7   3 16.0216 6.79493   2
 -12   7  -3 19.1340 7.50646   1
  12   7   3 12.5364 6.35720   2
 -13  -7  -3 6.96960 4.11437   1
  13  -7   3 12.4453 7.11963   2
 -13   7  -3 10.4797 7.58218   1
  13   7   3 9.91956 6.56538   2
  14  -7   3 94.2573 15.5837   2
 -14   7  -3 91.7308 17.0031   1
  14   7   3 111.045 15.3938   2
  15  -7   3 37.8471 11.6863   2
  15   7   3 37.6769 11.5581   2
  16  -7   3 1.55845 8.11868   2
  16   7   3 4.33920 9.05960   2
 -16   7  -3 20.2564 13.9357   1
  17  -8  -3 31.4956 12.0108   2
 -17   8   3 45.6446 19.5659   1
  16  -8  -3 5.86173 7.32645   2
  16   8  -3 9.27539 7.20462   2
  15  -8  -3 43.9661 11.9589   2
  15   8  -3 46.3871 10.2576   2
 -15   8   3 19.7987 10.0079   1
  14  -8  -3 15.9684 7.76753   2
 -14   8   3 32.9906 10.2104   1
  14   8  -3 29.9799 7.61723   2
  13  -8  -3 12.7547 7.44238   2
  13   8  -3 23.0710 7.67309   2
 -13   8   3 15.9116 8.23745   1
  12  -8  -3 28.8970 7.42843   2
 -12   8   3 15.5450 7.37418   1
  12   8  -3 14.9527 6.28029   2
  11  -8  -3 878.220 41.5281   2
  11   8  -3 854.927 40.8828   2
 -11   8   3 853.958 42.8761   1
  10  -8  -3 96.4479 10.8734   2
  10   8  -3 111.585 11.2202   2
 -10   8   3 103.578 12.5624   1
   9  -8  -3 337.857 20.2175   2
  -9   8   3 324.018 21.9604   1
   9   8  -3 347.317 20.2552   2
   8  -8  -3 16.1400 4.84901   2
   8   8  -3 8.88210 3.65611   2
  -8   8   3 20.8290 5.83831   1
   7  -8  -3 94.0052 8.42537   2
  -7   8   3 75.8263 9.68530   1
   7   8  -3 63.1735 7.34477   2
   6  -8  -3 1254.64 47.8207   2
   6   8  -3 1192.61 47.9262   2
  -6   8   3 1234.90 50.5047   1
   5  -8  -3 271.456 14.9698   2
   5   8  -3 305.358 15.8395   2
  -5   8   3 279.426 17.0269   1
   4  -8  -3 227.603 12.4158   2
   4   8  -3 232.846 9.07727   1
   4   8  -3 205.586 8.51532   1
  -4   8   3 232.834 14.4645   1
   3  -8  -3 1141.41 42.1280   2
   3   8  -3 1066.14 38.6429   1
  -3   8   3 1111.21 43.9988   1
   3   8  -3 1158.25 39.5479   1
   3   8  -3 1167.70 42.9904   2
  -2  -8   3 318.118 15.8221   2
   2  -8  -3 339.167 17.0133   1
   2  -8  -3 331.671 15.5127   2
   2   8  -3 329.070 13.9966   1
  -2   8   3 332.550 16.6910   1
   2   8  -3 357.926 14.9341   1
  -2   8   3 333.699 15.4957   2
   1  -8  -3 162.413 9.37752   2
   1  -8  -3 146.089 9.76742   1
  -1  -8   3 160.841 9.71732   2
  -1   8   3 175.660 9.96868   1
   1   8  -3 168.225 9.02768   1
   1   8  -3 163.701 9.48961   2
  -1   8   3 165.228 9.37966   2
   1   8  -3 170.140 9.66989   1
   0  -8  -3 96.8772 7.58212   1
   0  -8   3 94.1542 6.88485   2
   0  -8  -3 91.6396 6.57965   2
   0   8  -3 78.2140 6.25100   2
   0   8   3 85.5516 6.22713   1
   0   8  -3 68.9411 6.48088   1
   0   8   3 85.3034 6.30465   2
   0   8  -3 99.4330 7.01037   1
  -1  -8  -3 1431.47 51.5265   2
   1  -8   3 1398.36 51.7699   2
  -1  -8  -3 1499.31 50.5274   1
  -1   8  -3 1370.37 53.0334   1
   1   8   3 1442.56 51.4581   2
  -1   8  -3 1379.97 52.2636   1
   1   8   3 1456.98 50.0675   1
  -2  -8  -3 53.4526 4.43514   1
   2  -8   3 60.4009 5.51072   2
  -2   8  -3 49.2093 6.30009   1
   2   8   3 50.5121 3.90999   1
   2   8   3 54.8808 5.37065   2
  -3  -8  -3 295.380 12.2942   1
  -3   8  -3 262.959 20.1821   1
   3   8   3 310.092 12.1624   1
   3   8   3 317.171 15.5588   2
  -4  -8  -3 178.366 7.89204   1
   4  -8   3 175.145 11.5867   2
   4   8   3 176.919 11.2985   2
   4   8   3 199.174 7.85470   1
  -4   8  -3 170.809 13.0642   1
   5  -8   3 3.87744 2.38806   2
  -5  -8  -3 7.82698 1.52453   1
   5   8   3 8.18806 1.54347   1
   5   8   3 12.0978 3.31058   2
  -5   8  -3 -1.0129 2.45331   1
   6  -8   3 130.847 10.3904   2
  -6  -8  -3 113.290 5.14030   1
   6   8   3 116.100 9.75254   2
  -6   8  -3 116.975 11.7179   1
  -7  -8  -3 107.093 5.23322   1
  -7  -8  -3 116.794 5.24007   1
   7  -8   3 106.469 10.2369   2
  -7   8  -3 118.528 12.0150   1
   7   8   3 102.473 9.70016   2
  -8  -8  -3 341.232 12.7967   1
   8  -8   3 321.393 20.2560   2
  -8  -8  -3 321.558 12.5860   1
   8   8   3 329.303 19.9898   2
  -8   8  -3 370.314 23.1849   1
  -9  -8  -3 179.743 8.16043   1
   9  -8   3 192.409 15.4675   2
  -9  -8  -3 194.996 8.31854   1
  -9   8  -3 188.698 16.6421   1
   9   8   3 190.376 15.1049   2
 -10  -8  -3 40.6532 4.05723   1
 -10  -8  -3 36.1271 4.13194   1
  10  -8   3 41.7237 10.2748   2
  10   8   3 43.3462 7.82528   2
 -10   8  -3 25.1964 7.05610   1
  11  -8   3 2.17877 4.39138   2
 -11  -8  -3 0.19561 2.44141   1
 -11  -8  -3 0.03143 2.12005   1
 -11   8  -3 2.12297 6.79538   1
  11   8   3 -2.1074 3.42477   2
  12  -8   3 13.6630 6.86705   2
 -12   8  -3 -1.8193 5.58934   1
  12   8   3 3.45928 4.40648   2
  13  -8   3 194.063 19.2178   2
 -13   8  -3 207.032 20.5202   1
  13   8   3 180.674 17.9418   2
  14  -8   3 65.0061 14.9644   2
 -14   8  -3 79.4827 16.8396   1
  14   8   3 70.8111 15.4651   2
  15  -8   3 150.462 19.0543   2
  15   8   3 130.418 18.4499   2
 -15   8  -3 175.198 33.2964   1
  16  -8   3 0.47147 8.80489   2
  16   8   3 -2.3579 7.32471   2
  17  -9  -3 2.69004 10.6335   2
  16  -9  -3 30.6098 11.2765   2
  16   9  -3 27.9323 9.89240   2
 -16   9   3 30.1965 13.7081   1
  15  -9  -3 -5.4472 6.53242   2
 -15   9   3 -4.1897 7.80264   1
  15   9  -3 24.2327 8.29922   2
  14  -9  -3 15.3774 8.88353   2
 -14   9   3 6.66972 7.65050   1
  14   9  -3 3.32631 5.82666   2
  13  -9  -3 -0.4315 5.86894   2
  13   9  -3 1.98115 4.96680   2
 -13   9   3 9.39045 7.60644   1
  12  -9  -3 305.643 22.0421   2
 -12   9   3 264.927 22.7389   1
  12   9  -3 281.198 21.0986   2
  11  -9  -3 87.0252 11.0215   2
  11   9  -3 77.2841 9.84883   2
 -11   9   3 46.6138 13.9773   1
  10  -9  -3 138.946 13.0722   2
  10   9  -3 148.595 13.5498   2
 -10   9   3 135.218 14.9368   1
   9  -9  -3 111.456 11.3549   2
   9   9  -3 123.337 11.5233   2
  -9   9   3 110.134 12.7878   1
   8  -9  -3 -3.8896 2.52526   2
  -8   9   3 5.00126 3.70127   1
   8   9  -3 8.46888 2.99622   2
   7  -9  -3 7.45414 2.92062   2
  -7   9   3 -1.3608 2.48407   1
   7   9  -3 2.04723 1.93835   2
   6  -9  -3 5.80917 3.18501   2
  -6   9   3 3.48010 2.56966   1
   6   9  -3 2.07240 1.99283   2
   5  -9  -3 14.2700 4.17717   2
   5   9  -3 23.1574 3.92921   2
  -5   9   3 12.1801 4.27801   1
   4  -9  -3 167.852 10.5582   2
  -4   9   3 174.330 12.5622   1
   4   9  -3 165.247 7.21661   1
   4   9  -3 147.434 6.73014   1
   4   9  -3 168.094 10.9751   2
   3  -9  -3 716.685 29.0564   2
   3   9  -3 689.402 25.6826   1
   3   9  -3 676.022 26.2422   1
  -3   9   3 821.276 37.4249   1
   2  -9  -3 183.160 10.1202   2
  -2  -9   3 151.123 10.0255   2
  -2   9   3 138.744 10.1157   1
   2   9  -3 153.977 8.38259   1
   2   9  -3 159.916 8.92192   1
  -1  -9   3 414.011 19.6824   2
   1  -9  -3 427.602 19.9795   1
   1  -9  -3 453.783 19.6855   2
   1   9  -3 440.581 19.4074   1
  -1   9   3 426.059 19.7707   1
   1   9  -3 429.005 20.2195   1
  -1   9   3 483.287 21.7434   2
   0  -9  -3 36.8951 4.48484   2
   0  -9   3 35.6749 4.49738   2
   0  -9  -3 40.7899 5.04191   1
   0   9   3 37.9090 4.41318   1
   0   9   3 37.9902 5.57455   2
   0   9  -3 49.1427 5.42861   1
   0   9  -3 41.2423 4.87936   1
   1  -9   3 88.1635 7.30389   2
  -1  -9  -3 100.097 7.35097   2
  -1  -9  -3 91.9056 6.87655   1
  -1   9  -3 93.2699 8.12374   1
   1   9   3 106.361 6.68157   1
  -2  -9  -3 708.659 26.2163   1
   2  -9   3 619.165 29.1378   2
   2   9   3 709.696 28.6519   2
  -2   9  -3 672.729 30.2424   1
   2   9   3 706.522 25.7453   1
  -3  -9  -3 248.477 10.9906   1
   3  -9   3 250.978 14.2564   2
   3   9   3 250.230 10.7299   1
  -3   9  -3 250.486 15.9869   1
   3   9   3 264.739 14.1891   2
  -4  -9  -3 43.8698 3.32171   1
   4  -9   3 43.8719 5.61720   2
  -4   9  -3 41.6678 7.04526   1
   4   9   3 54.7560 5.97856   2
   4   9   3 40.1300 2.92983   1
  -5  -9  -3 32.9494 2.48941   1
   5  -9   3 32.0549 5.53091   2
   5   9   3 31.6084 5.17279   2
   5   9   3 29.4604 2.10547   1
  -5   9  -3 20.3762 5.62824   1
   6  -9   3 1.63315 2.27138   2
   6   9   3 2.51089 2.23044   2
  -6   9  -3 4.70261 3.72507   1
   7  -9   3 492.473 25.6641   2
   7   9   3 483.108 25.1664   2
  -7   9  -3 514.796 28.4213   1
   8  -9   3 292.312 18.9736   2
   8   9   3 265.585 18.0004   2
  -8   9  -3 284.975 20.5243   1
   9  -9   3 922.730 42.5733   2
  -9   9  -3 944.289 45.2075   1
   9   9   3 896.189 41.7694   2
  10  -9   3 10.2020 6.09551   2
  10   9   3 11.0619 4.56614   2
 -10   9  -3 2.13923 5.37708   1
  11  -9   3 45.2443 9.50010   2
 -11   9  -3 42.1697 10.7139   1
  11   9   3 46.2287 9.37313   2
  12  -9   3 67.1163 12.7752   2
 -12   9  -3 69.7504 13.5033   1
  12   9   3 91.0448 12.4266   2
  13  -9   3 54.2182 12.5595   2
  13   9   3 91.2751 13.3166   2
 -13   9  -3 45.6875 11.7293   1
  14  -9   3 175.307 19.8283   2
 -14   9  -3 164.692 20.5863   1
  14   9   3 190.726 19.2578   2
  15  -9   3 167.868 20.3257   2
 -15   9  -3 176.969 23.2788   1
  15   9   3 109.247 18.0486   2
  16  -9   3 -3.2058 7.98366   2
  16   9   3 -7.7018 6.72927   2
  17 -10  -3 52.7393 15.0888   2
  16 -10  -3 90.4832 17.1102   2
 -16  10   3 105.720 19.4878   1
  16  10  -3 75.0787 17.1378   2
  15 -10  -3 4.14383 8.85711   2
  15  10  -3 7.25790 15.4833   2
 -15  10   3 -9.4458 7.25403   1
  14 -10  -3 13.5493 8.61431   2
  14  10  -3 16.8666 7.35573   2
 -14  10   3 3.79456 7.82476   1
  13 -10  -3 277.603 23.2762   2
 -13  10   3 301.940 24.7929   1
  13  10  -3 318.542 23.6872   2
  12 -10  -3 7.87620 5.31934   2
  12  10  -3 26.3548 8.00504   2
 -12  10   3 29.7464 10.2130   1
  11 -10  -3 1.55367 4.58767   2
  11  10  -3 9.67773 4.77018   2
 -11  10   3 0.24700 4.90815   1
  10 -10  -3 43.2377 9.95233   2
  10  10  -3 63.0142 15.0963   2
 -10  10   3 35.9635 9.24012   1
   9 -10  -3 60.3803 8.05832   2
   9  10  -3 44.4224 7.64420   2
  -9  10   3 39.8872 9.34987   1
   8 -10  -3 93.0315 9.43925   2
   8  10  -3 97.7991 10.1010   2
  -8  10   3 94.7601 11.7880   1
   7 -10  -3 400.123 21.3765   2
  -7  10   3 369.224 22.7862   1
   7  10  -3 395.377 21.5328   2
   6 -10  -3 197.876 13.2111   2
   6  10  -3 189.642 13.2164   2
  -6  10   3 207.584 15.6398   1
   5 -10  -3 69.9997 6.84101   2
  -5  10   3 85.8508 9.47322   1
   5  10  -3 65.2137 7.06876   2
   4 -10  -3 124.082 9.26843   2
   4  10  -3 134.629 6.33908   1
   4  10  -3 139.564 6.75661   1
   4  10  -3 140.650 10.4046   2
  -4  10   3 149.628 11.8701   1
   3 -10  -3 1760.95 62.3594   2
   3  10  -3 1682.52 62.9015   2
   3  10  -3 1657.21 58.2747   1
   3  10  -3 1746.47 59.1142   1
  -3  10   3 1696.79 64.1803   1
   2 -10  -3 198.884 11.4083   2
  -2 -10   3 193.673 11.9642   2
  -2  10   3 172.689 11.6976   1
   2  10  -3 182.684 9.85225   1
   2  10  -3 208.645 10.6612   1
   1 -10  -3 77.5434 6.68406   2
  -1 -10   3 66.7034 7.73936   2
   1  10  -3 61.4858 5.80338   1
  -1  10   3 62.1168 6.36807   1
   1  10  -3 57.4951 5.78303   1
   0 -10  -3 1041.35 39.7638   2
   0 -10  -3 1058.42 39.6261   1
   0 -10   3 1024.47 40.8604   2
   0  10   3 1035.17 39.0812   1
   0  10  -3 1028.83 40.4027   1
   0  10  -3 987.297 39.3948   1
  -1 -10  -3 20.0279 4.30691   2
   1 -10   3 26.8373 4.33814   2
  -1 -10  -3 21.2989 4.05773   1
   1  10   3 21.6745 3.40121   1
  -1  10  -3 16.9206 4.47372   1
   2 -10   3 45.9128 5.68555   2
  -2 -10  -3 46.6493 4.69387   1
  -2  10  -3 41.7606 6.23936   1
   2  10   3 56.9341 4.56917   1
   2  10   3 43.9668 5.22216   2
  -3 -10  -3 95.0542 5.94757   1
   3 -10   3 106.716 8.33580   2
   3  10   3 89.1494 5.53024   1
  -3  10  -3 88.7012 9.09342   1
   3  10   3 84.8962 7.58052   2
   4 -10   3 308.806 16.9546   2
  -4 -10  -3 298.029 12.0866   1
   4  10   3 286.396 16.4858   2
  -4  10  -3 295.414 18.9497   1
   4  10   3 310.900 11.8731   1
   5 -10   3 1.53117 2.47780   2
  -5  10  -3 4.23759 3.25556   1
   5  10   3 4.37725 1.05563   1
   5  10   3 5.53063 2.93539   2
   6 -10   3 101.781 9.72463   2
   6  10   3 73.7915 8.45711   2
  -6  10  -3 80.0713 10.1633   1
   7 -10   3 473.473 24.9014   2
  -7  10  -3 428.362 26.2424   1
   8 -10   3 291.710 18.7311   2
  -8  10  -3 256.837 19.9235   1
   8  10   3 241.566 17.1563   2
   9 -10   3 47.1021 10.1736   2
  -9  10  -3 31.5659 8.72332   1
   9  10   3 52.7387 8.13474   2
  10 -10   3 96.2143 12.6398   2
 -10  10  -3 98.4622 15.1107   1
  10  10   3 96.2949 11.4953   2
  11 -10   3 3.09014 4.65304   2
 -11  10  -3 -3.5551 4.88208   1
  11  10   3 7.83451 5.22968   2
  12 -10   3 29.4070 8.71151   2
  12  10   3 38.9729 9.75605   2
 -12  10  -3 20.1560 9.37256   1
  13 -10   3 0.71574 6.59467   2
 -13  10  -3 -1.2864 8.23296   1
  13  10   3 3.81197 6.22094   2
  14 -10   3 -12.512 5.42889   2
  14  10   3 -10.970 4.88523   2
 -14  10  -3 -2.3755 7.56946   1
  15 -10   3 92.2590 17.0651   2
 -15  10  -3 57.9769 14.7450   1
  15  10   3 60.2690 15.0455   2
  16 -10   3 11.4412 10.0833   2
  16  10   3 11.6443 8.90229   2
  16 -11  -3 16.1481 10.2932   2
  16  11  -3 33.8427 10.9032   2
 -16  11   3 47.0991 22.9011   1
  15 -11  -3 74.2918 14.4556   2
 -15  11   3 46.9869 13.7865   1
  15  11  -3 67.1648 13.8479   2
  14 -11  -3 382.535 28.6238   2
 -14  11   3 407.269 29.5598   1
  14  11  -3 369.488 27.4247   2
  13 -11  -3 305.485 24.0300   2
  13  11  -3 347.935 25.1443   2
 -13  11   3 340.284 27.3905   1
  12 -11  -3 18.4161 6.90764   2
  12  11  -3 16.6638 7.30579   2
 -12  11   3 20.0809 7.96850   1
  11 -11  -3 153.779 14.9309   2
  11  11  -3 172.626 15.2838   2
 -11  11   3 130.209 16.3354   1
  10 -11  -3 8.82170 5.55199   2
 -10  11   3 4.00690 7.63261   1
  10  11  -3 13.2153 5.53318   2
   9 -11  -3 116.922 11.5359   2
   9  11  -3 142.101 12.6520   2
  -9  11   3 127.465 14.2745   1
   8 -11  -3 54.3150 7.77783   2
  -8  11   3 60.1520 9.81665   1
   8  11  -3 38.5540 6.79778   2
   7 -11  -3 85.5684 9.35760   2
  -7  11   3 106.396 12.1405   1
   7  11  -3 89.1921 9.56855   2
   6 -11  -3 1094.74 45.0964   2
   6  11  -3 1090.49 45.5696   2
  -6  11   3 1151.04 48.8459   1
   5 -11  -3 41.9535 5.66061   2
  -5  11   3 31.2262 6.69075   1
   5  11  -3 39.0353 5.38231   2
   4 -11  -3 2384.24 83.9206   2
   4  11  -3 2266.51 77.7012   1
   4  11  -3 2339.76 78.2450   1
  -4  11   3 2367.75 86.5837   1
   3 -11  -3 201.772 12.0468   2
   3  11  -3 182.694 12.2364   2
   3  11  -3 194.212 9.92130   1
  -3  11   3 175.083 12.7687   1
   3  11  -3 189.555 9.46452   1
  -2 -11   3 18.2041 4.64545   2
   2 -11  -3 4.51097 2.67310   2
  -2  11   3 13.8020 3.40415   1
   2  11  -3 3.76596 2.02476   1
   2  11  -3 8.26043 2.48996   1
  -1 -11   3 294.375 16.0241   2
   1 -11  -3 299.408 15.6013   2
   1  11  -3 276.048 14.4727   1
  -1  11   3 300.373 15.9358   1
   1  11  -3 300.217 15.3506   1
   0 -11   3 2.78265 2.08573   2
   0 -11  -3 8.09579 3.16248   1
   0 -11  -3 4.12342 1.73336   2
   0  11  -3 5.69218 2.77320   1
   0  11   3 1.99817 1.77774   1
  -1 -11  -3 4.67485 2.67591   2
   1 -11   3 0.05888 1.76078   2
  -1 -11  -3 3.62026 2.43049   1
   1  11   3 5.22508 2.21259   1
   2 -11   3 490.119 23.3909   2
  -2  11  -3 496.397 25.1464   1
   2  11   3 502.040 23.4092   2
   2  11   3 510.870 20.5357   1
  -3 -11  -3 3.51361 1.90264   1
   3 -11   3 1.28635 1.65375   2
   3  11   3 -0.3539 1.29131   2
  -3  11  -3 -0.1989 2.03351   1
   3  11   3 2.12340 1.55188   1
  -4 -11  -3 253.355 10.9641   1
   4 -11   3 245.368 15.4129   2
   4  11   3 246.184 15.2195   2
  -4  11  -3 251.225 17.6264   1
   4  11   3 265.926 10.6462   1
   5 -11   3 122.011 10.4853   2
   5  11   3 114.810 9.96304   2
  -5  11  -3 102.981 11.5360   1
   6 -11   3 532.987 27.2717   2
   6  11   3 553.156 27.0849   2
  -6  11  -3 547.605 30.1209   1
   7 -11   3 -1.6193 2.54917   2
   7  11   3 2.93874 2.98387   2
  -7  11  -3 -0.8297 3.11492   1
   8 -11   3 581.182 31.1163   2
  -8  11  -3 681.498 35.5212   1
   8  11   3 599.159 30.9327   2
   9 -11   3 4.62301 4.89537   2
   9  11   3 3.38420 7.97270   2
  -9  11  -3 8.78061 5.85071   1
  10 -11   3 14.5299 6.50122   2
  10  11   3 4.18041 4.68732   2
 -10  11  -3 4.04564 6.17701   1
  11 -11   3 191.675 18.2326   2
 -11  11  -3 228.408 21.3276   1
  11  11   3 201.254 18.0018   2
  12 -11   3 35.7930 10.0602   2
  12  11   3 34.8155 9.32295   2
 -12  11  -3 37.9524 11.0203   1
  13 -11   3 142.512 18.8614   2
  13  11   3 164.631 17.4166   2
 -13  11  -3 190.178 21.7612   1
  14 -11   3 -1.1084 9.37104   2
 -14  11  -3 5.32276 10.2047   1
  14  11   3 -8.5124 7.21920   2
  15 -11   3 11.9376 8.95795   2
 -15  11  -3 -3.3626 9.48942   1
  15  11   3 0.73419 7.26925   2
  16 -11   3 10.2171 9.22956   2
  16  11   3 -2.2417 7.46739   2
  16 -12  -3 -2.3974 8.33773   2
 -16  12   3 5.81909 11.0398   1
  16  12  -3 19.4469 8.92796   2
  15 -12  -3 -1.5850 6.45555   2
 -15  12   3 -4.4074 7.80775   1
  15  12  -3 9.80110 7.16611   2
  14 -12  -3 13.4936 8.29832   2
 -14  12   3 14.8865 7.91516   1
  14  12  -3 14.9731 8.35536   2
  13 -12  -3 77.6818 13.6957   2
  13  12  -3 72.3939 12.1695   2
 -13  12   3 106.169 17.2696   1
  12 -12  -3 4.28413 4.96196   2
 -12  12   3 4.03157 5.31645   1
  12  12  -3 0.79251 4.94388   2
  11 -12  -3 7.12320 4.77089   2
  11  12  -3 5.57309 4.72629   2
 -11  12   3 -0.5001 4.60390   1
  10 -12  -3 18.6876 4.65687   2
 -10  12   3 6.17869 6.08695   1
  10  12  -3 15.2754 5.04048   2
   9 -12  -3 22.7352 6.07361   2
   9  12  -3 24.8166 5.92884   2
  -9  12   3 36.4195 9.38774   1
   8 -12  -3 31.0201 6.72045   2
  -8  12   3 32.0018 8.42961   1
   8  12  -3 19.9110 4.93679   2
   7 -12  -3 72.8120 8.33976   2
  -7  12   3 72.6536 10.3457   1
   7  12  -3 48.1770 7.78093   2
   6 -12  -3 580.577 28.5072   2
  -6  12   3 593.184 31.4545   1
   6  12  -3 621.404 29.4122   2
   5 -12  -3 13.1780 3.66440   2
  -5  12   3 1.95336 3.07477   1
   5  12  -3 7.51580 2.96529   2
   5  12  -3 10.2756 1.30741   1
   4 -12  -3 377.298 19.2090   2
   4  12  -3 368.724 14.8888   1
   4  12  -3 357.046 19.6091   2
  -4  12   3 334.265 20.3992   1
   4  12  -3 347.519 14.2888   1
   3 -12  -3 36.1805 5.28459   2
  -3  12   3 36.2692 6.28177   1
   3  12  -3 32.1342 5.30568   2
   3  12  -3 27.8050 3.94660   1
   3  12  -3 32.8637 3.99431   1
   2 -12  -3 614.824 26.8496   2
  -2 -12   3 587.241 27.2111   2
   2  12  -3 575.110 24.3708   1
   2  12  -3 632.654 25.4263   1
  -2  12   3 585.541 27.5511   1
  -1 -12   3 2.87880 2.08520   2
   1 -12  -3 3.33160 2.11038   2
   1  12  -3 4.94590 2.78412   1
   1  12  -3 6.18297 2.67610   1
   0 -12  -3 391.504 18.9297   2
   0 -12   3 333.165 18.3914   2
   0  12  -3 333.795 18.4559   1
   0  12   3 353.355 17.4913   1
  -1 -12  -3 433.561 19.4988   1
   1 -12   3 399.718 20.5966   2
  -1 -12  -3 403.977 20.3293   2
   1  12   3 409.048 18.7930   1
  -1  12  -3 413.941 21.6232   1
  -2 -12  -3 0.77924 2.04481   1
   2 -12   3 2.21484 2.00245   2
   2  12   3 -0.0356 1.41744   1
   2  12   3 -0.8679 1.50179   2
  -2  12  -3 -0.7616 2.06261   1
  -3 -12  -3 34.0481 4.27454   1
   3 -12   3 36.8006 5.85607   2
   3  12   3 38.2955 3.75296   1
   3  12   3 39.2317 5.69166   2
  -3  12  -3 31.5139 6.95708   1
   4 -12   3 26.4120 4.91567   2
  -4 -12  -3 23.8401 3.24304   1
   4  12   3 18.5898 2.71971   1
   4  12   3 22.0198 5.44422   2
  -4  12  -3 32.7943 7.69724   1
   5 -12   3 35.1428 6.16579   2
   5  12   3 23.2961 5.78291   2
  -5  12  -3 22.4315 5.73537   1
   6 -12   3 29.7993 6.65269   2
  -6  12  -3 43.7320 9.96537   1
   6  12   3 48.5083 7.40996   2
   7 -12   3 15.0443 5.36950   2
   7  12   3 15.2903 4.79686   2
  -7  12  -3 27.4961 8.39812   1
   8 -12   3 97.6258 11.3655   2
  -8  12  -3 107.233 13.4840   1
   8  12   3 99.5366 10.7983   2
   9 -12   3 203.323 17.1641   2
  -9  12  -3 178.358 18.7577   1
   9  12   3 210.481 16.5813   2
  10 -12   3 484.367 29.3424   2
 -10  12  -3 500.997 33.2200   1
  10  12   3 521.914 29.7429   2
  11 -12   3 16.3853 6.85230   2
  11  12   3 13.9579 5.72722   2
 -11  12  -3 3.89385 5.07973   1
  12 -12   3 60.2155 12.4255   2
  12  12   3 71.3804 12.1058   2
 -12  12  -3 41.6413 11.3711   1
  13 -12   3 7.07854 5.83379   2
 -13  12  -3 9.10122 8.05268   1
  13  12   3 8.06898 6.26719   2
  14 -12   3 79.7799 16.3357   2
  14  12   3 87.6111 15.3305   2
 -14  12  -3 57.1358 14.6024   1
  15 -12   3 10.8028 9.49306   2
  15  12   3 -4.0994 6.17133   2
 -15  12  -3 5.28886 10.8257   1
  16 -12   3 -0.8785 10.3469   2
  16  12   3 2.39134 10.3750   2
  16 -13  -3 13.1416 9.77819   2
  16  13  -3 25.8026 13.8398   2
  15 -13  -3 16.6951 10.0890   2
  15  13  -3 7.66025 6.96878   2
  14 -13  -3 -3.9912 6.00715   2
  14  13  -3 -3.8131 6.01422   2
 -14  13   3 -5.6927 6.81003   1
  13 -13  -3 2.88270 7.69777   2
  13  13  -3 9.12310 6.10055   2
 -13  13   3 0.97871 7.03496   1
  12 -13  -3 92.0528 13.7464   2
 -12  13   3 95.1021 16.9919   1
  12  13  -3 98.7279 13.8250   2
  11 -13  -3 62.3552 11.0237   2
 -11  13   3 69.3667 14.0492   1
  11  13  -3 43.3066 9.89362   2
  10 -13  -3 161.001 15.0579   2
 -10  13   3 113.476 16.4164   1
  10  13  -3 151.576 14.2026   2
   9 -13  -3 222.701 18.0118   2
   9  13  -3 236.698 17.9619   2
   8 -13  -3 63.3980 9.16075   2
  -8  13   3 70.3653 11.4504   1
   8  13  -3 73.7356 9.24706   2
   7 -13  -3 100.558 10.5662   2
  -7  13   3 124.008 13.2158   1
   7  13  -3 103.356 10.6019   2
   6 -13  -3 155.446 12.6549   2
  -6  13   3 147.415 13.8440   1
   6  13  -3 133.410 12.1152   2
   5 -13  -3 87.6793 8.80444   2
   5  13  -3 76.9657 8.10361   2
   5  13  -3 79.5353 4.06982   1
   5  13  -3 83.6698 4.19314   1
  -5  13   3 112.509 11.5748   1
   4 -13  -3 9.05985 3.37700   2
   4  13  -3 8.70433 3.63504   2
   4  13  -3 6.46131 1.78997   1
  -4  13   3 -1.9925 2.28386   1
   4  13  -3 7.97468 2.23956   1
   3 -13  -3 7.86162 3.11777   2
   3  13  -3 6.97140 2.87899   1
   3  13  -3 5.61803 2.61417   1
  -3  13   3 4.92584 2.83630   1
   3  13  -3 5.86037 2.92003   2
   2 -13  -3 12.3094 3.96944   2
  -2 -13   3 9.99382 3.54985   2
  -2  13   3 11.6979 3.56859   1
   2  13  -3 11.6215 3.10084   1
   2  13  -3 17.4792 3.83456   1
   1 -13  -3 123.744 9.99121   2
  -1 -13   3 144.025 11.1474   2
  -1  13   3 145.007 11.0601   1
   1  13  -3 137.444 10.1995   1
   0 -13   3 296.003 16.8338   2
   0 -13  -3 262.606 15.7750   2
   0  13   3 280.510 15.3565   1
   0  13  -3 282.892 16.7323   1
   1 -13   3 35.0726 5.59535   2
  -1 -13  -3 34.6047 5.66209   2
  -1  13  -3 33.9849 5.89419   1
   1  13   3 41.3956 4.89581   1
   2 -13   3 91.0368 8.81374   2
  -2 -13  -3 85.1029 7.45699   1
  -2  13  -3 69.2449 8.87200   1
   2  13   3 89.7605 6.77037   1
   2  13   3 84.6895 8.26084   2
   3 -13   3 184.024 13.4060   2
  -3 -13  -3 192.288 14.9730   1
   3  13   3 205.507 10.4968   1
  -3  13  -3 204.875 15.7426   1
   3  13   3 225.907 14.4587   2
  -4 -13  -3 1323.77 46.6290   1
   4 -13   3 1391.28 54.0691   2
   4  13   3 1322.50 53.1322   2
   4  13   3 1310.14 46.0984   1
  -4  13  -3 1327.34 56.5908   1
   5 -13   3 103.970 10.2452   2
  -5  13  -3 88.1308 11.8518   1
   5  13   3 112.495 10.4297   2
   5  13   3 109.170 4.67811   1
   6 -13   3 1075.06 46.9530   2
   6  13   3 1127.40 47.1197   2
  -6  13  -3 1070.53 50.2508   1
   7 -13   3 0.91396 4.22397   2
  -7  13  -3 24.1319 7.07432   1
   7  13   3 2.60112 2.96136   2
   8 -13   3 9.59475 5.60610   2
  -8  13  -3 12.6532 5.11919   1
   8  13   3 8.88273 3.93567   2
   9 -13   3 198.137 17.4473   2
   9  13   3 187.597 16.0014   2
  -9  13  -3 173.372 18.6377   1
  10 -13   3 34.2407 8.52708   2
 -10  13  -3 58.9545 14.2981   1
  10  13   3 59.3052 10.3447   2
  11 -13   3 0.65002 6.55726   2
 -11  13  -3 -7.6280 4.98188   1
  11  13   3 -4.5448 4.09345   2
  12 -13   3 116.027 16.4599   2
 -12  13  -3 106.896 17.9870   1
  12  13   3 132.268 14.9652   2
  13 -13   3 33.3451 11.2802   2
 -13  13  -3 33.0325 11.0947   1
  13  13   3 19.6422 8.97208   2
  14 -13   3 21.9798 10.7121   2
  14  13   3 9.45203 8.00632   2
 -14  13  -3 10.6808 11.8437   1
  15 -13   3 6.29607 9.51196   2
  15  13   3 18.2329 10.5458   2
  16 -14  -3 5.39873 9.02622   2
 -16  14   3 4.67983 10.8852   1
  15 -14  -3 29.7858 10.8608   2
  15  14  -3 41.1771 12.9150   2
  14 -14  -3 48.5681 11.6492   2
 -14  14   3 42.5480 12.3267   1
  13 -14  -3 12.9072 7.10666   2
  13  14  -3 -0.6556 5.22369   2
 -13  14   3 11.1115 8.36104   1
  12 -14  -3 121.673 16.3041   2
 -12  14   3 136.335 18.7270   1
  12  14  -3 171.743 17.2557   2
  11 -14  -3 1061.78 49.5634   2
  11  14  -3 985.172 48.2658   2
 -11  14   3 1024.72 52.7655   1
  10 -14  -3 16.2326 5.55223   2
  10  14  -3 4.35664 3.53282   2
 -10  14   3 3.13417 6.28979   1
   9 -14  -3 88.5592 11.1323   2
  -9  14   3 85.1984 13.2657   1
   9  14  -3 72.6564 10.7558   2
   8 -14  -3 393.955 23.9953   2
   8  14  -3 418.400 24.9192   2
  -8  14   3 425.826 27.6135   1
   7 -14  -3 7.35693 3.65663   2
  -7  14   3 -0.6048 3.74782   1
   7  14  -3 -2.4979 2.71692   2
   6 -14  -3 916.309 39.4699   2
  -6  14   3 899.635 42.7264   1
   6  14  -3 806.264 38.8840   2
   5 -14  -3 874.775 37.9084   2
   5  14  -3 861.695 38.5146   2
   5  14  -3 862.851 29.6415   1
   5  14  -3 815.913 29.2641   1
  -5  14   3 867.821 40.8477   1
   4 -14  -3 32.9129 6.13413   2
  -4  14   3 19.5259 5.49963   1
   4  14  -3 27.7016 5.57973   2
   4  14  -3 24.5200 3.97799   1
   4  14  -3 32.9459 4.13263   1
   3 -14  -3 72.8721 7.76778   2
   3  14  -3 77.2028 8.44057   2
   3  14  -3 59.0460 6.17259   1
   3  14  -3 78.8440 6.53001   1
  -3  14   3 74.0831 8.74598   1
   2 -14  -3 53.3849 6.71524   2
  -2 -14   3 67.6369 7.94136   2
   2  14  -3 63.1650 7.23383   1
   2  14  -3 52.6311 6.19961   1
  -2  14   3 52.8485 7.27467   1
   1 -14  -3 479.773 23.8279   2
  -1 -14   3 464.715 24.2448   2
[truncated: 2,141,989 more chars]
